# Supplementary material for: Degenerative Cervical Myelopathy induces sex-specific dysbiosis in mice
Source: Front Microbiol. 2023 Oct 20;14:1229783. doi: 10.3389/fmicb.2023.1229783 (PMC10623434; doi:10.3389/fmicb.2023.1229783)
Supplement: Supplementary file 1 [file Table_1.XLSX]

forward_reads	reverse_reads	label_Gender_Treatment_Block
S00H20001_S154_L001_R1_001.fastq.gz	S00H20001_S154_L001_R2_001.fastq.gz	MT1-PV1
S00H20002_S155_L001_R1_001.fastq.gz	S00H20002_S155_L001_R2_001.fastq.gz	MT1-PV2
S00H20003_S156_L001_R1_001.fastq.gz	S00H20003_S156_L001_R2_001.fastq.gz	MT1-PV3
S00H20004_S157_L001_R1_001.fastq.gz	S00H20004_S157_L001_R2_001.fastq.gz	MT1-PV4
S00H20005_S158_L001_R1_001.fastq.gz	S00H20005_S158_L001_R2_001.fastq.gz	MT1-PV5
S00H20006_S159_L001_R1_001.fastq.gz	S00H20006_S159_L001_R2_001.fastq.gz	MT1-PV6
S00H20007_S160_L001_R1_001.fastq.gz	S00H20007_S160_L001_R2_001.fastq.gz	MC1-PV7
S00H20008_S161_L001_R1_001.fastq.gz	S00H20008_S161_L001_R2_001.fastq.gz	MC1-PV8
S00H20009_S162_L001_R1_001.fastq.gz	S00H20009_S162_L001_R2_001.fastq.gz	MC1-PV9
S00H20010_S163_L001_R1_001.fastq.gz	S00H20010_S163_L001_R2_001.fastq.gz	MC1-PV10
S00H20011_S164_L001_R1_001.fastq.gz	S00H20011_S164_L001_R2_001.fastq.gz	MC1-PV11
S00H20012_S165_L001_R1_001.fastq.gz	S00H20012_S165_L001_R2_001.fastq.gz	MT2-PV12
S00H20013_S166_L001_R1_001.fastq.gz	S00H20013_S166_L001_R2_001.fastq.gz	MT2-PV13
S00H20014_S167_L001_R1_001.fastq.gz	S00H20014_S167_L001_R2_001.fastq.gz	MT2-PV14
S00H20015_S168_L001_R1_001.fastq.gz	S00H20015_S168_L001_R2_001.fastq.gz	MT2-PV15
S00H20016_S169_L001_R1_001.fastq.gz	S00H20016_S169_L001_R2_001.fastq.gz	MT2-PV16
S00H20017_S170_L001_R1_001.fastq.gz	S00H20017_S170_L001_R2_001.fastq.gz	MT2-PV17
S00H20018_S171_L001_R1_001.fastq.gz	S00H20018_S171_L001_R2_001.fastq.gz	MC2-PV18
S00H20019_S172_L001_R1_001.fastq.gz	S00H20019_S172_L001_R2_001.fastq.gz	MC2-PV19
S00H20020_S173_L001_R1_001.fastq.gz	S00H20020_S173_L001_R2_001.fastq.gz	MC2-PV20
S00H20021_S174_L001_R1_001.fastq.gz	S00H20021_S174_L001_R2_001.fastq.gz	MC2-PV21
S00H20022_S175_L001_R1_001.fastq.gz	S00H20022_S175_L001_R2_001.fastq.gz	MC2-PV22
S00H20023_S176_L001_R1_001.fastq.gz	S00H20023_S176_L001_R2_001.fastq.gz	MT3-PV23
S00H20024_S177_L001_R1_001.fastq.gz	S00H20024_S177_L001_R2_001.fastq.gz	MT3-PV24
S00H20025_S178_L001_R1_001.fastq.gz	S00H20025_S178_L001_R2_001.fastq.gz	MT3-PV25
S00H20026_S179_L001_R1_001.fastq.gz	S00H20026_S179_L001_R2_001.fastq.gz	MT3-PV26
S00H20027_S180_L001_R1_001.fastq.gz	S00H20027_S180_L001_R2_001.fastq.gz	MT3-PV27
S00H20028_S181_L001_R1_001.fastq.gz	S00H20028_S181_L001_R2_001.fastq.gz	MT3-PV28
S00H20029_S182_L001_R1_001.fastq.gz	S00H20029_S182_L001_R2_001.fastq.gz	MC3-PV29
S00H20030_S183_L001_R1_001.fastq.gz	S00H20030_S183_L001_R2_001.fastq.gz	MC3-PV30
S00H20031_S184_L001_R1_001.fastq.gz	S00H20031_S184_L001_R2_001.fastq.gz	MC3-PV31
S00H20032_S185_L001_R1_001.fastq.gz	S00H20032_S185_L001_R2_001.fastq.gz	MC3-PV32
S00H20033_S186_L001_R1_001.fastq.gz	S00H20033_S186_L001_R2_001.fastq.gz	MC3-PV33
S00HJ-0001_S244_L001_R1_001.fastq.gz	S00HJ-0001_S244_L001_R2_001.fastq.gz	FC1-PV34
S00HJ-0002_S245_L001_R1_001.fastq.gz	S00HJ-0002_S245_L001_R2_001.fastq.gz	FC1-PV35
S00HJ-0003_S246_L001_R1_001.fastq.gz	S00HJ-0003_S246_L001_R2_001.fastq.gz	FC1-PV36
S00HJ-0004_S247_L001_R1_001.fastq.gz	S00HJ-0004_S247_L001_R2_001.fastq.gz	FC1-PV37
S00HJ-0005_S248_L001_R1_001.fastq.gz	S00HJ-0005_S248_L001_R2_001.fastq.gz	FC1-PV38
S00HJ-0006_S249_L001_R1_001.fastq.gz	S00HJ-0006_S249_L001_R2_001.fastq.gz	FT1-PV39
S00HJ-0007_S250_L001_R1_001.fastq.gz	S00HJ-0007_S250_L001_R2_001.fastq.gz	FT1-PV40
S00HJ-0008_S251_L001_R1_001.fastq.gz	S00HJ-0008_S251_L001_R2_001.fastq.gz	FT1-PV41
S00HJ-0009_S252_L001_R1_001.fastq.gz	S00HJ-0009_S252_L001_R2_001.fastq.gz	FT1-PV42
S00HJ-0010_S253_L001_R1_001.fastq.gz	S00HJ-0010_S253_L001_R2_001.fastq.gz	FT1-PV43
S00HJ-0011_S254_L001_R1_001.fastq.gz	S00HJ-0011_S254_L001_R2_001.fastq.gz	FT1-PV44
S00HJ-0012_S255_L001_R1_001.fastq.gz	S00HJ-0012_S255_L001_R2_001.fastq.gz	FC2-PV45
S00HJ-0013_S256_L001_R1_001.fastq.gz	S00HJ-0013_S256_L001_R2_001.fastq.gz	FC2-PV46
S00HJ-0014_S257_L001_R1_001.fastq.gz	S00HJ-0014_S257_L001_R2_001.fastq.gz	FC2-PV47
S00HJ-0015_S258_L001_R1_001.fastq.gz	S00HJ-0015_S258_L001_R2_001.fastq.gz	FC2-PV48
S00HJ-0016_S259_L001_R1_001.fastq.gz	S00HJ-0016_S259_L001_R2_001.fastq.gz	FC2-PV49
S00HJ-0017_S260_L001_R1_001.fastq.gz	S00HJ-0017_S260_L001_R2_001.fastq.gz	FT2-PV50
S00HJ-0018_S261_L001_R1_001.fastq.gz	S00HJ-0018_S261_L001_R2_001.fastq.gz	FT2-PV51
S00HJ-0019_S262_L001_R1_001.fastq.gz	S00HJ-0019_S262_L001_R2_001.fastq.gz	FT2-PV52
S00HJ-0020_S263_L001_R1_001.fastq.gz	S00HJ-0020_S263_L001_R2_001.fastq.gz	FT2-PV53
S00HJ-0021_S264_L001_R1_001.fastq.gz	S00HJ-0021_S264_L001_R2_001.fastq.gz	FT2-PV54
S00HJ-0022_S265_L001_R1_001.fastq.gz	S00HJ-0022_S265_L001_R2_001.fastq.gz	FT2-PV55
S00HJ-0023_S266_L001_R1_001.fastq.gz	S00HJ-0023_S266_L001_R2_001.fastq.gz	FC3-PV56
S00HJ-0024_S267_L001_R1_001.fastq.gz	S00HJ-0024_S267_L001_R2_001.fastq.gz	FC3-PV57
S00HJ-0025_S268_L001_R1_001.fastq.gz	S00HJ-0025_S268_L001_R2_001.fastq.gz	FC3-PV58
S00HJ-0026_S269_L001_R1_001.fastq.gz	S00HJ-0026_S269_L001_R2_001.fastq.gz	FC3-PV59
S00HJ-0027_S270_L001_R1_001.fastq.gz	S00HJ-0027_S270_L001_R2_001.fastq.gz	FC3-PV60
S00HJ-0028_S271_L001_R1_001.fastq.gz	S00HJ-0028_S271_L001_R2_001.fastq.gz	FT3-PV61
S00HJ-0029_S272_L001_R1_001.fastq.gz	S00HJ-0029_S272_L001_R2_001.fastq.gz	FT3-PV62
S00HJ-0030_S277_L001_R1_001.fastq.gz	S00HJ-0030_S277_L001_R2_001.fastq.gz	FT3-PV63
S00HJ-0031_S278_L001_R1_001.fastq.gz	S00HJ-0031_S278_L001_R2_001.fastq.gz	FT3-PV64
S00HJ-0032_S273_L001_R1_001.fastq.gz	S00HJ-0032_S273_L001_R2_001.fastq.gz	FT3-PV65
S00HJ-0033_S276_L001_R1_001.fastq.gz	S00HJ-0033_S276_L001_R2_001.fastq.gz	FT3-PV66
