# Supplementary material for: Degenerative Cervical Myelopathy induces sex-specific dysbiosis in mice
Source: Front Microbiol. 2023 Oct 20;14:1229783. doi: 10.3389/fmicb.2023.1229783 (PMC10623434; doi:10.3389/fmicb.2023.1229783)
Supplement: Supplementary file 3 [file Table_3.XLSX]

## Sheet: Female-Ctrl_vs_Treatment-Zscore
ASV	FC1-PV34	FC1-PV35	FC1-PV36	FC1-PV37	FC1-PV38	FC2-PV45	FC2-PV46	FC2-PV47	FC2-PV48	FC2-PV49	FC3-PV56	FC3-PV57	FC3-PV58	FC3-PV59	FC3-PV60	FT1-PV39	FT1-PV40	FT1-PV41	FT1-PV42	FT1-PV43	FT1-PV44	FT2-PV50	FT2-PV51	FT2-PV52	FT2-PV53	FT2-PV54	FT2-PV55	FT3-PV61	FT3-PV62	FT3-PV63	FT3-PV64	FT3-PV65	FT3-PV66
d60593a75368eb2dd66ecbbec3313863	-0.663989	-0.765997	-1.40305	-1.31348	-1.54118	-0.402448	0.706657	0.278733	0.0813667	1.95517	-0.395918	-0.272465	-0.41167	1.32544	2.95561	0.407375	0.914258	0.856186	-0.191302	-1.41971	-0.756932	1.45822	-0.724495	-0.0118347	0.293179	-0.987992	-0.00407476	-0.733329	-0.0538613	0.708271	-0.420679	0.208974	0.324974
f80166d86a7f15b69b6ac97505299c3a	-0.466693	-1.01129	0.906051	-0.770753	-1.24515	-0.958449	-0.873665	0.121727	-0.543385	-1.07855	-0.651569	-0.224127	-1.23228	-0.555094	-0.253479	0.640463	1.43915	0.514666	2.13064	0.521411	2.22728	-0.755513	-1.17359	-0.168794	1.28531	-0.651794	-0.715889	-0.567047	0.122305	0.232841	1.22123	1.048	1.48604
7bacf637b0a935317e9de08fd1bcb72c	-0.303474	-0.442947	-0.38353	-0.413406	-0.3949	-0.448319	-0.448319	-0.448312	-0.448315	-0.448309	-0.315639	-0.275319	-0.448319	-0.448317	-0.448318	-0.363801	-0.448319	-0.448319	0.192392	3.2601	0.0518805	-0.448302	-0.448314	-0.448319	1.01167	3.63572	-0.37977	-0.383878	-0.448319	-0.448319	0.294919	0.352896	1.58182
c2c9d37c184935fe0f8a889e7105c241	-0.404155	-0.619602	0.0701433	2.13096	2.02379	-0.632073	-0.673236	2.53661	-0.572026	0.653684	-0.238352	-0.040961	3.20423	-0.517222	-0.489237	-0.430369	-0.69686	-0.63717	-0.673462	-0.248015	-0.33378	-0.649287	-0.145843	-0.610085	-0.248846	-0.477978	0.293093	-0.0922628	-0.367972	-0.606605	0.344354	-0.582945	-0.268519
b44aff2995f396f00ad579d8e6684335	0.352072	-0.720187	-0.0282159	-0.812863	-0.657051	1.10627	1.47723	-0.223226	-0.897206	-0.280713	0.442162	0.628006	-0.965837	-0.594002	-0.484144	0.149339	1.0465	2.1471	0.958359	-1.91776	0.344918	-0.771585	-0.7665	0.19279	0.0914536	-1.49994	-0.262585	-0.234331	2.51199	1.41651	-0.175184	-1.0905	-0.482883
fdbff060c0adc3184b21540df9bbbee1	-0.487469	-0.682298	2.04218	-0.422573	-0.0327734	-0.603462	-0.705762	-0.808414	-0.311186	0.104417	-0.521984	-0.545646	-0.799435	1.14071	-0.480449	0.867602	4.34621	0.49466	0.372638	-0.781921	0.0136929	0.114141	0.484153	-0.300049	0.312835	-0.407195	-0.371948	-0.0300826	-0.720198	0.000477091	-0.2438	-0.308631	-0.728442
1328ddadac3f2d08eb25e79a18f7e574	-0.330454	-0.330454	3.58555	-0.33044	-0.330454	-0.330453	-0.330454	-0.330437	-0.330444	-0.33043	-0.330454	2.36356	-0.330454	-0.33045	-0.330452	-0.330454	-0.330454	-0.330454	-0.330454	-0.330411	-0.330454	-0.330414	-0.330444	-0.330454	0.210511	-0.330444	-0.137666	-0.330454	-0.330454	-0.330454	3.23058	-0.330451	-0.330453
c2ad34addc26f871b36e062f6816d89f	-0.301671	-0.301671	2.86012	-0.301644	-0.301671	-0.301669	-0.301671	-0.301638	-0.301652	-0.301626	-0.301671	4.07813	-0.301671	-0.301663	-0.301667	-0.301671	-0.301671	-0.301671	-0.301671	-0.301591	-0.301671	-0.301596	-0.301651	-0.301671	-0.301671	-0.301652	-0.301671	-0.301671	-0.301671	-0.301671	2.11154	-0.301665	-0.301669
476a27c3796dfc1790e181f789663a33	2.28893	-0.472779	-0.472774	0.970169	-0.472779	-0.472779	-0.472779	-0.472771	-0.37573	-0.377061	2.98892	-0.472779	0.702672	1.08207	-0.150192	-0.472779	-0.472779	-0.472779	-0.472779	-0.47276	-0.472779	-0.472761	-0.472774	3.04792	-0.472779	-0.472775	-0.472779	-0.472779	-0.472779	0.696158	-0.472777	-0.472778	-0.472779
cb8b8a6ee6bcfa115f8b24a45fa1c12a	1.3159	-0.161458	-1.31925	-0.848855	-0.789512	2.63963	2.9217	-0.224469	-0.221369	-1.31921	0.852855	1.35187	-0.778069	-0.608385	-0.121636	-0.43541	0.222353	0.611567	0.88567	-0.678392	0.713794	-0.0841465	-0.802438	-0.743365	0.885818	-0.720789	-0.421513	-0.664789	0.0553119	-0.565632	-0.0349932	-0.586211	-0.326582
499f1c879aa937fd84ec658999d69c43	1.43388	0.363665	-1.02288	0.0359502	1.66489	-0.365974	-1.02291	0.136263	-1.02289	0.0228318	0.294746	0.838118	1.03208	-0.634881	-1.0229	-0.225657	-0.597162	-0.448315	-1.02291	1.36058	-1.02291	0.492157	1.17311	-1.02291	-1.02291	0.285106	1.0258	2.96905	-1.02291	-1.02291	-0.166772	-0.185664	-0.274765
405cffae21e3269ae7c795d56acdb42a	-0.497466	0.0307268	0.783666	0.0267577	-0.236781	-1.38557	-0.811172	-0.960691	1.79446	1.08925	-0.983876	-0.516385	-1.10035	0.204065	0.557546	-0.188478	2.30556	0.337016	2.16454	-0.22401	1.98066	-0.689951	-0.00121373	-0.811325	-0.153499	0.200733	-0.992818	-0.684788	-0.636453	-0.736811	-0.103644	1.26295	-1.02265
daae43be6cf06991f62a085ba8bff3b6	-1.28237	-1.16136	-0.137989	-0.715903	-0.749538	-0.660309	-0.0586688	0.08837	-0.0219256	1.07856	0.161853	0.92357	-1.19482	-1.2079	-0.679835	-0.222131	-0.395907	1.08485	-0.0604281	-1.38125	0.92129	1.56506	-0.274613	2.12985	-0.0558579	-1.09746	1.17113	-0.15459	0.238195	2.48572	-0.322577	-0.988192	0.975176
d27a7938be9be7fcde444b0d8a1e7f84	-0.624417	0.291175	-0.238228	1.8702	1.37537	-1.18627	-0.521127	0.10318	0.974273	1.02774	-0.972233	-1.10797	1.17742	2.969	0.669332	0.776391	-0.346553	-0.181264	-0.271598	-1.23981	-0.661102	0.387886	0.288998	-0.701143	-0.767091	-0.345491	1.29021	-0.681604	-0.651223	-1.19138	-1.10068	-0.373487	-0.0384913
1930d2ae4018583d606e705beea31bd1	-0.78647	-0.621964	3.20239	0.467134	0.578549	-0.613656	1.29505	0.72583	1.06987	0.561181	-0.693449	-0.715889	-1.20813	0.444909	0.612879	-0.112917	0.512286	1.67325	0.750104	-1.35051	0.962379	-0.0255433	-0.268592	0.315156	-0.308871	-1.34105	-0.440985	-1.18414	-0.56624	-0.154506	-0.739224	-0.795648	-1.24318
f72d0a81bead898b2fa029f7a11f28c7	1.15343	1.32537	-0.686065	-0.644707	-0.657418	1.00962	-0.089364	-0.554223	-0.686066	0.472936	0.280602	4.24438	-0.337454	-0.633121	0.415434	-0.686076	-0.686076	-0.686076	-0.171642	1.21289	-0.119958	-0.686035	-0.686065	-0.686076	-0.402749	0.488488	-0.0704921	-0.686076	-0.674929	-0.686076	-0.362513	0.620682	0.355417
72e530a4206f2e4804d502f4dfca8387	1.2149	0.306314	-0.919953	-0.900737	-1.72462	1.5755	1.84036	-0.638692	-0.548819	-0.97205	0.730199	0.411872	-0.801753	-0.172654	0.336245	-0.0374499	0.843812	1.57576	0.861332	-1.4679	0.435252	-0.132056	-0.94129	0.981603	0.255688	-1.36977	-0.866592	-0.772475	0.033272	2.14057	-0.583292	-0.649999	-0.0425913
0ebb2cf4a2017aeaefadf9ae5062eb62	-0.386981	-0.0999318	2.87019	-0.338047	-0.365114	0.194915	1.3333	-0.120854	-0.366326	0.975016	0.283159	-0.484309	-1.32841	-0.884954	-0.317416	-0.42292	0.4986	1.23369	1.21227	-0.691203	-0.778951	-0.14075	-0.666901	0.770662	-0.784259	-1.29168	-0.633423	-0.0354689	1.80895	1.72617	-0.721932	-1.44765	-0.599438
e4597f1dce864c29882fa64f616d1a6c	-0.353903	-0.67444	1.10345	-0.829122	0.240623	-0.651552	-1.0623	-0.494111	-0.556028	-0.776792	-0.359417	-0.749595	-1.57731	-0.906054	-0.354533	0.0356883	0.154561	0.0998542	2.84324	1.09934	1.76051	-0.81597	-1.20103	-0.200893	2.30757	0.762174	-0.10125	-0.787707	-0.217471	0.366418	0.806741	0.34011	0.7492
129500150cad877075ed12b0c9424282	-0.94515	-0.655437	2.00073	0.192593	-0.0718454	-0.831879	1.38654	-0.00855881	-1.18857	-0.718709	1.42112	1.44213	-1.1167	-0.885977	1.14956	-0.790881	-0.235142	1.2147	0.536787	-1.21792	1.09876	-0.291552	-1.24202	0.296276	0.591848	-1.03947	-0.270762	-0.7418	0.132593	2.16842	-0.581839	-0.819659	0.0218135
7d02f99e2ea00512b055a4e70f84c18b	0.475468	4.67516	-0.508284	-0.250909	-0.460055	-0.303883	-0.263267	-0.508258	-0.508289	-0.443945	-0.404151	-0.50833	-0.251993	-0.457914	-0.416597	0.274208	-0.50833	1.78988	-0.50833	-0.508152	-0.50833	0.724068	0.445287	0.901571	-0.50833	-0.48137	-0.32396	-0.151532	0.664691	0.245028	-0.394505	-0.508317	-0.508326
57d7db0d1473a71e4955463f11cbbfb7	1.19636	0.0709525	-0.0743353	-0.297826	-0.483088	1.99026	0.755428	-0.556133	-0.776679	-0.776642	1.57211	1.2316	-0.70714	-0.776694	-0.7767	-0.00170049	0.0863734	-0.776705	-0.776705	-0.776594	-0.221929	-0.776602	-0.0775586	0.179568	-0.374552	-0.776678	-0.776705	0.934602	1.43432	3.19642	-0.776694	-0.776697	-0.533636
26d6bdf4eb4f1daf826c5efa6f103407	-0.685739	-0.57955	0.389949	3.01411	-0.137599	0.547288	-0.899654	-0.471865	-0.632102	-0.693851	-0.870029	-0.555183	1.2811	-0.99007	-0.218736	2.79193	-0.216505	0.608931	-0.312891	-0.584411	0.845599	-0.165984	1.25293	1.11997	-0.591005	-0.993545	0.510603	-0.358665	-0.127763	0.148845	-0.633714	-0.888843	-0.903548
91c6bd1773aaec302882b43aff6babc4	1.39715	0.0591471	-0.201872	-0.769953	-0.769991	1.67937	0.977671	-0.769945	-0.769965	-0.769927	1.41417	1.2291	-0.769991	-0.634935	-0.769986	0.0697592	0.328965	0.251157	-0.769991	-0.769878	-0.769991	0.0410026	-0.769963	-0.0305828	-0.769991	-0.769964	-0.312129	1.2725	1.39219	3.06392	-0.447083	-0.769982	-0.769988
020f48a69f9bf40e54fbac885f94695a	-0.431782	1.77167	-0.431771	-0.431768	-0.431782	-0.431781	4.80886	-0.431765	-0.431772	-0.431759	0.0056475	-0.280643	-0.431782	-0.431778	-0.43178	-0.431782	0.592458	0.414785	-0.431782	-0.169091	0.457207	-0.431744	0.30902	-0.431782	-0.431782	-0.0991923	-0.431782	0.420083	0.836476	-0.431782	-0.431778	-0.431778	-0.43178
2eb2fe0471e37d54b5e1c47660220ad6	0.225854	-0.383385	-1.43668	-1.19068	-1.66011	0.839347	2.49993	-0.070149	-0.354368	-0.709555	0.129256	0.876841	-1.48446	-0.650947	-0.215342	0.343431	0.790207	2.06941	0.0851747	-1.09135	0.214885	0.43819	-0.733373	0.228091	-0.271724	-1.099	-0.609401	-0.253279	1.47501	1.70736	0.56347	-0.525624	0.252955
c1def48b42e159b33dd366fb124ea638	1.40659	-0.661259	-0.637856	-1.23791	-1.55863	0.90117	1.52008	-0.858474	-0.58731	-0.20647	-0.563848	-0.653692	-1.24194	-0.508473	-0.567678	0.659678	2.58518	1.56381	0.084058	-0.568812	2.03866	0.444488	-0.291996	-0.4716	0.164794	-1.05014	-1.00394	-0.402706	0.380066	0.908678	0.0451909	-0.13365	0.50395
5aaa7f98b6c0b334e8f67ec73b468d71	-0.731302	-0.685551	0.959937	3.33071	0.811913	0.0197435	-1.14105	0.538594	-0.544761	-0.12509	-0.79807	-0.607141	3.09882	-0.726939	-0.0642612	1.00275	-0.621485	-0.241926	-0.195863	-0.248673	0.902249	-0.436327	-0.0248546	0.158292	-0.410025	-0.883166	0.497644	-0.56585	-0.325397	-0.233701	-0.439683	-0.732253	-0.537282
761106f9ba9bdabce9e9b1417f097101	-0.560525	0.516874	-0.560501	-0.560494	-0.560525	-0.560523	1.9797	-0.560488	-0.560504	-0.560474	1.73237	1.62402	-0.560525	-0.560516	-0.560521	-0.560525	3.24926	1.82301	-0.560525	-0.560434	-0.560525	-0.56044	-0.560502	-0.326999	-0.560525	-0.560503	-0.560525	-0.0391736	-0.560525	0.261903	0.57485	0.935336	-0.560522
ed78bbc1db0ff176088ec1eeb30cde95	0.952387	-0.585801	-0.522884	-1.1175	-1.1283	1.08188	1.09579	-0.908191	-0.364814	1.72753	-0.192993	-0.394562	-0.77809	-1.21317	0.0787442	1.06491	1.0139	2.17599	0.20769	-1.18165	-0.0811666	-0.0674536	-0.9427	0.338048	0.440045	-1.33111	-0.317383	0.44875	2.08954	0.761421	-1.10761	-1.25445	0.0132
876295a7cd8394f70f60a6fb62837bdd	1.1861	-0.601507	-0.930043	-0.824494	-0.672712	1.1936	0.344383	-0.904584	-0.734817	1.12115	0.0580785	1.00053	-0.992373	-0.855685	-0.835118	0.932754	1.55994	1.27123	2.52705	0.538413	0.480735	-1.36864	-1.36883	-1.0181	1.22967	-0.554237	0.256355	-0.702344	-1.08622	-0.636357	-0.0139015	0.157341	0.24263
d04b16de2b3bfa84754a4eafcfaec69a	-0.437396	-0.437396	-0.437396	-0.437396	-0.437396	-0.437396	-0.437396	-0.437396	-0.437396	-0.437396	-0.437396	-0.437396	-0.437396	-0.437396	-0.437396	0.028758	-0.437396	-0.437396	-0.437396	-0.437206	-0.437396	2.03575	0.421316	0.890877	-0.437396	-0.437351	-0.437396	2.03863	3.05778	2.89892	-0.437377	-0.437382	-0.437391
9b4036adb487adfe4ca484346b5b9a7b	-0.70616	1.31234	-0.706148	0.5388	0.688859	-0.706159	-0.70616	-0.282159	2.82138	2.21372	-0.70616	-0.70616	-0.70616	-0.125327	-0.706158	-0.70616	-0.70616	0.0423797	-0.70616	0.231425	-0.70616	-0.169965	1.74626	-0.70616	-0.70616	0.208954	1.57447	0.729896	1.17983	-0.70616	-0.706155	-0.706156	-0.706159
2f806cc7ee628e7d22e255b5f881fd06	-0.580617	0.257108	-0.580592	-0.580584	0.696191	-0.242862	-0.206856	-0.580577	-0.350065	-0.271089	0.302505	0.23986	-0.465923	-0.580607	-0.580613	-0.429429	-0.425933	-0.580617	-0.254641	1.79237	-0.501832	-0.0641485	-0.580592	-0.580617	0.125139	3.87134	0.0160181	-0.18761	-0.580617	-0.580617	-0.44901	2.81485	0.120666
5292f29cab69c370997bcb039ef68d64	-0.620772	-0.312284	0.901796	-1.21998	-0.575506	-1.22018	-1.2202	-0.0662835	0.43576	-0.0882926	-0.271012	-0.0572622	1.27529	0.601751	-0.296941	3.05671	1.28062	1.94415	0.284676	-1.21954	0.106233	0.867187	0.976801	-0.585453	-1.2202	-0.222732	-0.322783	-1.2202	0.00649457	0.658147	-0.29172	-0.144086	-1.22018
2d3c374eb6cea127942bd0177b3bde09	1.25188	-0.563652	0.324871	-0.385507	-0.314543	0.0437919	0.0119745	-0.412578	-0.77197	-0.178395	-0.454416	0.159616	-0.772018	-0.655571	-0.484429	-0.772018	-0.772018	-0.772018	2.17848	1.16588	0.488328	-0.771826	-0.771966	-0.772018	3.66939	0.677495	1.10526	-0.772018	-0.772018	-0.772018	0.148103	-0.0537665	0.769696
7adfa4f0e342de54304e1c50112cd387	-0.255359	-0.0907255	-0.0787973	-0.370369	-0.709541	-0.259539	-0.201077	-0.991847	-0.459749	0.579419	-0.449422	0.147218	-0.533698	-0.399408	-0.0425364	0.683488	1.58097	2.73622	-0.755569	-0.991712	-0.673665	0.166265	-0.165319	1.11845	-0.685343	-0.866502	-0.64035	0.770159	0.69033	3.28528	-0.76046	-0.991922	-0.384882
3ccdc88a8737c3ac98bd0a40b1b93bf8	0.508932	-0.651947	-0.492986	-0.651895	-0.651947	-0.651943	-0.651947	-0.419888	-0.651911	-0.414332	-0.651947	-0.651947	-0.212865	-0.377935	0.157381	3.01519	1.12112	2.73749	-0.651947	-0.651791	-0.651947	1.70191	0.831337	0.597478	-0.651947	-0.65191	-0.531648	1.18687	0.250781	0.772	-0.651932	-0.651935	-0.651943
9c6688b479e664fa9d070647653e49ed	1.72985	2.75173	-0.749743	0.0652202	-0.749774	0.640512	-0.749774	-0.749725	0.21874	-0.749706	0.509977	-0.749774	-0.258488	-0.180965	-0.749769	-0.749774	-0.749774	0.459583	-0.749774	-0.749653	-0.749774	-0.749662	2.4828	-0.749774	-0.0588415	0.403949	0.586268	1.29437	1.76375	-0.355892	-0.573377	-0.232962	-0.749771
208a08b90e13b04d2ef2f584535a2d39	-0.307401	-0.294764	-0.520382	3.48861	1.36606	-0.404839	-0.459242	2.45808	-0.549565	-0.116702	-0.345034	-0.462368	2.52686	-0.549579	-0.502486	-0.54959	-0.54959	-0.54959	-0.54959	-0.293165	-0.54959	-0.54949	0.887159	-0.210225	-0.432197	-0.26495	-0.211258	-0.146713	-0.108145	-0.417359	-0.24962	-0.158456	-0.424877
35f3ce6a0ee2829e6ccb193be3c4338b	-0.286287	-0.19227	-0.339447	-0.420253	-0.345587	-0.27646	-0.232735	-0.321905	-0.420273	-0.420209	-0.221058	-0.420318	-0.420318	-0.420298	-0.420309	0.0198416	-0.203081	1.80595	-0.420318	-0.42012	-0.420318	0.55748	1.84811	-0.420318	-0.420318	-0.42027	4.62681	0.0652472	0.344527	-0.219351	-0.420298	-0.420303	-0.325537
33ea9f7df7a02a6f06fb9700ed440401	0.92466	0.144848	0.567409	0.24261	-1.03269	0.795088	0.0886797	-1.20443	-0.92458	-0.703914	0.630028	-1.24671	-1.13112	-2.106	-0.338054	-0.4353	0.384787	1.36765	0.713096	-1.19112	-0.118532	0.233642	-0.118032	1.37981	0.566554	-0.208735	-0.306966	0.798814	2.23083	2.05247	-0.35985	-1.3383	-0.356649
5858157a5f3c4bdbc235927eae7ff303	-0.127719	-0.244162	-0.236184	0.0592078	-0.189501	0.803499	-1.52486	0.010913	-0.138403	1.42258	-0.480034	-0.000596459	-0.919261	-0.490832	0.456259	-0.10154	-0.49331	-0.296326	3.22497	0.74924	2.60921	-1.5245	-0.962908	-0.756675	1.21074	-0.246913	-0.52911	-0.22056	-0.647923	-0.40275	0.367712	-0.786142	0.405869
ef3a40c4f26b5019887d73ceaaab84f2	-0.679385	1.49449	-0.679365	0.148568	0.763018	-0.679383	-0.679385	-0.13922	2.13407	2.08234	-0.679385	-0.679385	-0.679385	-0.679377	-0.679381	-0.679385	-0.679385	0.109349	-0.679385	0.499154	-0.679385	-0.679313	2.15355	-0.679385	-0.679385	0.293578	1.82302	0.769242	1.45643	-0.679385	-0.679377	-0.679379	-0.679383
596f70447030c8a5e3ddf2bd3eadafa5	-0.611306	-0.611306	2.75853	0.437038	-0.0461323	-0.611302	-0.611306	-0.487372	-0.611263	-0.611201	-0.373612	-0.342182	-0.611306	-0.611288	-0.611298	-0.611306	-0.611306	-0.611306	2.51694	0.62612	1.55655	-0.611132	-0.611259	-0.611306	2.31882	-0.0399772	1.25526	-0.611306	-0.611306	-0.611306	0.85098	-0.28647	0.258626
7421a0056850e30172e2c541c9215c11	-0.427779	-0.400828	0.369173	-0.401422	-0.664912	-0.451221	-0.467308	0.490629	-0.445573	-0.535328	-0.401401	-0.24014	-0.670974	-0.45234	0.576438	0.257302	1.6235	1.03617	0.181197	-0.45463	-0.564973	-0.474769	-0.627357	3.79346	-0.298237	-0.564287	-0.702372	-0.374577	2.53607	0.695741	-0.601453	-0.724382	-0.61342
b8455681fc92d051fdd023aa62417fb3	-0.255863	-0.283179	0.86662	-0.000316832	2.51792	0.000478137	-0.580351	-0.31472	-0.58033	-0.5803	-0.580351	-0.580351	-0.580351	0.0198603	2.45381	-0.580351	-0.580351	-0.580351	0.381569	1.10449	-0.32378	0.572553	-0.580328	-0.580351	0.454759	-0.580329	-0.580351	3.25199	-0.580351	-0.580351	-0.580342	-0.580344	-0.580349
df0e3d38eec730326754d8c17a8b8efe	-0.0714776	-0.233576	-0.537192	-0.537171	-0.537264	4.07704	1.12189	-0.537151	-0.537199	-0.537106	-0.313988	-0.537264	-0.537264	-0.537236	-0.537252	2.59141	-0.383153	1.21645	-0.537264	-0.536984	-0.537264	-0.537004	-0.469032	-0.330399	0.173439	-0.410349	0.205277	-0.0844261	0.313411	0.360764	-0.322631	-0.537243	0.617217
2bc5942b5fd0f8140d1eaf96be69ff40	-0.154069	-1.33172	0.162079	-0.53191	-0.329441	0.122537	0.61768	-0.378165	-0.643301	0.830291	-0.0314807	-1.03954	-1.36769	-0.979205	-0.250206	-0.559288	2.18589	3.46493	1.59581	-0.783761	0.562696	0.341347	-0.661059	-0.203084	1.00455	-0.911482	-0.471066	-0.336797	-0.511235	0.470443	0.275683	-0.435395	0.275959
6c8fd159b1fc28483e06cb2d2c7b1597	-0.199297	-0.0923586	-0.467729	-0.467722	-0.467753	0.0447718	-0.467753	-0.467716	-0.467732	-0.467702	-0.467753	-0.467753	-0.467753	-0.467744	-0.467749	-0.467753	-0.467753	-0.467753	-0.165453	1.27102	-0.467753	-0.467668	-0.46773	-0.467753	0.00963487	2.34268	0.609436	-0.467753	-0.467753	-0.467753	0.392307	3.75008	2.32745
0d29a1eb24f264423251f3b2a92f7914	-0.897647	-0.897647	0.956878	-0.897517	-0.897647	-0.897638	0.00511704	-0.89749	-0.897557	-0.897428	0.155408	1.05317	-0.566376	-0.897608	-0.0990606	-0.897647	0.386591	1.38846	1.12713	-0.897258	-0.897647	1.02722	-0.89755	-0.897647	1.56372	0.54616	0.758112	1.34286	2.5722	-0.897647	0.365587	-0.220895	1.10129
a7b2ebeb585c5a9437a670f13d3234db	-0.63405	2.43313	-0.72767	0.0223612	0.723199	0.0244024	-0.0118493	-1.08149	0.868665	1.71771	0.323292	0.050049	1.23552	2.80596	-0.918378	-0.644678	-0.595752	-0.688203	-1.08159	0.0113395	-1.08159	0.290513	-0.181672	-0.753521	-0.685213	0.642487	0.593266	-0.359881	-1.08159	-0.901954	-1.08157	0.782751	-0.0140106
3b464b2c3ef760585938966db87f55c3	-0.198811	-0.198811	-0.198678	-0.198639	-0.198811	5.50894	-0.198811	-0.198603	-0.198691	-0.198521	0.653193	-0.198811	-0.198811	-0.198759	-0.198787	-0.198811	-0.198811	-0.198811	-0.198811	-0.198811	-0.198811	-0.198811	-0.198811	-0.198811	-0.198811	-0.198811	-0.198811	-0.198811	-0.198811	-0.198811	-0.198811	-0.198811	-0.198811
09d3418ddd00d62455350795193f724f	0.784065	1.17507	-0.664834	-0.664808	-0.664924	-0.664916	-0.664924	-0.664783	-0.664843	-0.664729	0.151092	-0.664924	-0.664924	-0.664889	-0.664908	2.28672	1.20256	1.21659	-0.664924	-0.664575	-0.664924	2.63319	1.84809	0.313376	-0.664924	-0.66484	-0.664924	1.18582	0.51061	0.655043	-0.664889	-0.664897	-0.664915
54a43d2113c13203e813d22b17f3f370	-0.35345	-0.243049	-0.412815	-0.0163065	2.25394	-0.249364	-0.723714	-0.461747	0.755521	0.568743	-0.723714	-0.371953	0.0940906	-0.130103	0.22808	-0.723714	-0.723714	-0.723714	2.66385	-0.335392	2.4369	-0.723388	-0.723626	-0.723714	-0.131825	-0.529956	2.42183	-0.723714	-0.723714	-0.723714	-0.321528	0.0494215	0.0455502
811f358e4e89eecbd75298ffce878cba	-0.598243	-0.365864	0.603271	0.867269	1.22847	-0.942995	-0.942999	1.23576	2.00194	-0.180063	-0.942999	-0.154872	-0.445243	0.990765	0.469766	0.0605868	-0.942999	-0.942999	-0.942999	-0.942835	0.707794	2.21433	1.72372	0.513779	-0.942999	-0.942959	-0.52176	1.51508	-0.475831	-0.230897	-0.787005	-0.942986	-0.942994
a0814dbcfc36b32aa80e5af6bca83748	-0.475156	-0.484121	1.14699	-0.0362725	-0.259979	-0.680211	-0.680221	0.479821	-0.224716	0.228154	-0.0614436	0.14826	-0.680221	-0.433493	-0.680203	-0.680221	-0.680221	-0.680221	4.39881	0.215022	1.53784	-0.67986	-0.680124	-0.680221	0.926977	-0.348509	0.372849	-0.680221	-0.680221	-0.341353	0.409052	0.0187147	0.944722
cd3526e9ddf608ed31c4f3d648ca8034	0.311502	0.517151	0.199896	-0.592456	-0.528687	0.320798	0.399955	0.32892	-0.339961	-0.848096	3.48831	1.74793	-0.84843	-0.84837	-0.848403	-0.166812	-0.291274	0.0200415	1.89597	1.11033	-0.197155	-0.847882	-0.848282	-0.456215	0.599188	-0.462294	-0.84843	-0.84843	1.24289	0.183466	-0.848371	-0.848385	-0.848414
cdb79eecfa38ac58e99bfdef45fabfce	-0.316199	-0.316199	-0.316168	-0.316159	-0.316199	5.00326	-0.316199	-0.31615	1.34301	-0.316131	0.187329	-0.316199	1.33624	0.79254	-0.316194	-0.316199	-0.316199	-0.316199	-0.316199	-0.31609	-0.316199	-0.316095	-0.316171	-0.316199	-0.316199	-0.316172	-0.316199	-0.316199	-0.316199	-0.316199	-0.125469	-0.316191	-0.316196
b00c3432b2ba4ccb41e22cbf1f9e336d	-1.17632	0.768843	-0.284399	-0.121281	-1.17632	-1.17631	2.45188	1.0907	0.593322	-1.17621	-0.699279	-1.17632	0.163833	0.269903	1.37374	-0.0955402	0.391044	-1.17632	0.284679	-1.17612	0.681644	2.22123	0.719445	0.984656	-0.516947	-1.17627	0.789661	-1.17632	0.615962	-0.040141	-0.156083	-0.473797	-0.426575
edefa736f3fd701281f967fa8952b8f3	-0.415201	-0.415201	-0.415105	-0.415078	-0.415201	1.26538	-0.415201	-0.415052	0.961105	-0.414994	-0.415201	-0.415201	-0.415201	3.88165	-0.415184	-0.415201	2.41732	-0.415201	-0.415201	-0.414836	-0.415201	-0.414861	-0.415109	-0.415201	-0.415201	-0.415113	-0.415201	-0.415201	-0.415201	-0.415201	1.73583	0.947657	-0.415191
99d1110a747f2702d8c86c94633237e0	-0.394534	-0.394534	-0.394278	-0.394205	-0.394534	-0.39451	-0.394534	0.674815	-0.394304	-0.393984	-0.394534	-0.394534	-0.394534	-0.394434	-0.394489	-0.394534	-0.394534	-0.394534	-0.394534	-0.393457	-0.394534	-0.393531	-0.394264	-0.394534	0.704927	1.62091	-0.394534	-0.394534	-0.394534	-0.394534	4.30831	1.87321	1.46636
b7aa21bce8178648a994aa472efa61eb	1.91021	2.00155	-1.1062	-0.706116	0.733578	-2.01371	0.156404	-1.41098	-0.501423	-0.164237	1.00498	-0.724599	-1.03739	-0.989836	-0.682719	1.89069	-0.207865	1.39285	-0.296672	-0.674327	0.045015	0.165577	0.530731	0.216021	-1.09525	0.414462	-0.0627954	0.402381	1.14285	0.448479	-0.626493	0.863498	-1.01867
d409f0f157c2b27807fbae78d69bcc0d	-0.418834	-0.844893	-0.214266	1.0243	1.99491	2.50567	-0.299549	0.908515	0.928972	0.472627	-0.608827	-0.844893	-0.844893	0.510925	1.4908	-0.844893	-0.362891	-0.844893	-0.844893	-0.844772	-0.844893	0.758873	1.3515	-0.844893	0.676525	-0.844864	-0.844893	1.03857	0.915401	-0.844893	-0.844881	-0.844883	-0.844889
79930541b37f85bd77cce357cd63dbb4	1.42743	-0.438818	-0.438735	-0.43871	-0.438818	-0.43881	1.03774	-0.438688	-0.438743	-0.438637	-0.438818	-0.438818	-0.438818	-0.438786	-0.438803	2.7368	-0.438818	-0.438818	-0.438818	-0.438493	-0.438818	3.12125	2.11303	-0.438818	-0.438818	-0.43874	-0.438818	1.41073	-0.438818	-0.438818	-0.438786	-0.438793	-0.438809
bc560da189cc724070e0d261f6ab3004	0.841727	0.867216	-0.480362	-0.294018	0.342982	1.70162	-0.298555	-0.337289	-0.48037	-0.480274	2.06881	-0.354405	-0.312967	-0.480408	-0.480423	-0.149343	-0.390498	-0.480437	-0.480437	-0.48015	-0.480437	-0.48017	4.28153	-0.289911	-0.480437	-0.480368	-0.480437	0.468709	-0.480437	0.0207898	-0.480408	-0.480415	-0.480429
df1e3080300aed496c300246714bd838	-0.528027	-0.850519	-0.235346	-0.120624	0.81069	-0.850515	-0.23219	0.449201	1.77133	0.601004	0.596103	-0.364009	1.57098	-0.850503	-0.351092	-0.850519	-0.489462	-0.850519	-0.850519	-0.85036	-0.850519	-0.850371	-0.850479	0.504248	-0.850519	-0.334011	0.395916	2.84795	-0.850519	-0.366994	2.36694	0.720227	0.593033
e903adaeb0efbea42c9d5aa462c105da	-0.572634	-0.572634	-0.307849	-0.572584	-0.499924	-0.57263	-0.572634	-0.572574	-0.572599	-0.49185	-0.223263	-0.0195236	-0.572634	-0.572619	-0.572627	-0.572634	-0.572634	-0.408	2.52679	3.03211	1.29804	-0.572494	-0.572596	-0.572634	1.52142	1.91694	0.0445047	-0.572634	-0.572634	-0.572634	-0.0965987	1.03999	0.974283
cd6dbb569337fc7ba0542287c426baa1	0.312449	0.919407	-0.708722	-0.708709	-0.708769	0.455481	1.15808	-0.708696	-0.708727	-0.708667	1.83218	2.65297	-0.708769	-0.708751	-0.708761	0.969769	0.228257	0.440877	-0.708769	-0.708589	-0.708769	-0.0858986	-0.708724	0.0366486	-0.708769	-0.708726	-0.708769	0.525394	1.92004	2.1003	-0.708751	-0.708756	-0.708765
04611dabe3583caf155167674ef7e0e4	3.84343	1.96582	-0.40268	-0.402593	-0.40298	-0.0371009	-0.40298	-0.402511	-0.40271	-0.402328	1.7769	-0.40298	-0.40298	-0.402863	-0.402927	-0.40298	-0.40298	-0.40298	2.04549	-0.401889	-0.40298	-0.40195	-0.4027	-0.40298	1.28078	-0.402712	-0.40298	-0.40298	-0.40298	-0.40298	-0.402868	-0.402894	-0.40295
ca8316436bfd3aa62fc76e2ed5b8fca8	0.614418	-0.118077	-0.70248	-0.702433	-0.70264	-0.702625	1.60071	-0.702389	-0.702496	-0.702291	1.08638	0.978842	-0.70264	-0.702578	-0.702612	0.878622	0.62072	2.1997	-0.70264	-0.70202	-0.70264	-0.702063	-0.0466798	1.18281	-0.70264	-0.702491	-0.70264	0.973962	1.60698	2.47174	-0.702578	-0.702593	-0.702624
fe1613129b71ea6b0351addf25c8bdbf	0.782011	1.17882	-0.444653	-0.318987	1.19246	2.82783	-0.132291	-0.530364	-0.5304	-0.530331	2.09739	-0.385923	0.13692	-0.456514	-0.53044	-0.530449	-0.530449	-0.530449	-0.530449	-0.53024	-0.530449	-0.530255	3.24872	-0.329617	-0.530449	-0.530399	-0.435833	-0.0312717	-0.354064	-0.0885607	-0.530428	-0.530433	-0.530444
95fdd816723ca482a5caba10bea171c8	-0.353295	-0.435894	0.545068	0.151703	-0.32246	-0.414532	-0.511562	1.40197	-0.420472	-0.385742	-0.412592	-0.445796	0.0268945	-0.0922989	5.05467	-0.0636263	-0.511562	-0.511562	-0.357119	-0.382488	-0.511562	0.380083	-0.398357	0.0558797	-0.334495	-0.447161	0.782211	-0.18916	-0.0208978	-0.265804	-0.214517	-0.403343	0.00782499
5328bc3fa40912ff2a09f9a53ac20c93	0.286225	-0.370326	-0.370087	0.323916	-0.370326	-0.370304	-0.370326	-0.369953	-0.370111	-0.369809	-0.370326	-0.370326	0.0632362	-0.370233	-0.370284	-0.370326	1.91198	-0.370326	1.27686	-0.36938	4.66418	-0.369443	-0.370088	-0.370326	1.09809	-0.370097	-0.370326	-0.370326	-0.370326	-0.370326	-0.370231	-0.370253	-0.3703
a8c32a5a27d0d56118ecc368e6b0329a	-0.471807	-0.471807	-0.471726	-0.471702	-0.471807	-0.471799	-0.471807	-0.47168	-0.471734	-0.471631	-0.471807	0.481542	-0.471807	-0.471775	-0.471792	-0.471807	-0.471807	-0.471807	3.13734	1.99574	1.17757	-0.471506	-0.471726	-0.471807	3.01786	1.27837	-0.471807	-0.471807	-0.471807	-0.471807	0.371802	0.333934	-0.471798
0b7f1cb34b5d69f9a7e85a494eab0be4	-0.730919	-0.730919	-0.501407	-0.149155	0.724846	-0.730911	-0.730919	-0.730783	0.977163	-0.730729	-0.730919	-0.730919	-0.398975	0.218227	-0.187919	-0.730919	-0.730919	-0.730919	0.352124	1.62372	0.6504	-0.730606	-0.730835	-0.730919	1.11504	1.78456	0.441385	-0.730919	-0.730919	-0.730919	1.26243	3.07532	1.43713
f7428585b7cf8d65f206036a5852adab	2.09441	1.28684	-0.201467	-0.306212	2.15254	-0.510162	-0.510169	0.733438	-0.510103	1.72773	3.23297	1.10459	-0.510169	-0.0910615	-0.510156	-0.510169	-0.510169	-0.510169	-0.510169	-0.510169	-0.510169	-0.510169	-0.510169	-0.510169	-0.510169	-0.510169	-0.510169	-0.510169	-0.510169	-0.510169	-0.510169	-0.510169	-0.510169
d4b8175c2cc6c6722d5d45082d4fd64d	-0.359346	-0.359346	-0.359303	-0.359291	1.71594	-0.359342	-0.359346	-0.359279	2.91027	3.05899	-0.359346	-0.359346	-0.359346	-0.35933	2.73565	-0.359346	-0.359346	-0.359346	-0.359346	-0.359346	-0.359346	-0.359346	-0.359346	-0.359346	-0.359346	-0.359346	-0.359346	-0.359346	-0.359346	-0.359346	-0.359346	-0.359346	-0.359346
a6bfdb3176b2fc52c2e55ef46213f792	-0.735601	1.98524	0.0903842	-0.735452	-0.468727	0.805245	0.922168	-0.73542	-0.735497	-0.735349	-0.735601	-0.313616	0.592745	-0.00762172	-0.735581	1.02342	-0.735601	-0.735601	-0.735601	-0.735153	0.0282005	1.41856	2.71241	2.21064	-0.735601	-0.735494	0.538419	-0.735601	-0.735601	-0.735601	-0.392456	1.11282	-0.48948
f3e9d78daeea42d345080748e31ae3dd	0.108053	-1.00309	-1.00298	0.508029	0.759021	1.96918	0.692877	-1.00291	1.85583	0.481619	-1.00309	-0.0515041	1.279	0.791204	0.0446666	-1.00309	-1.00309	-1.00309	-1.00309	0.76383	-0.46687	1.74161	-1.00298	-1.00309	0.315456	-1.00298	-1.00309	0.814537	0.612719	-1.00309	-1.00305	0.65417	1.1693
7ba07e4c2fed4da2d0fffb31ebc6c4ae	1.25867	1.84535	-0.432821	-0.432799	-0.432897	4.47803	1.06165	-0.432778	-0.432829	-0.432731	0.303281	-0.432897	-0.432897	-0.432868	-0.432884	-0.432897	-0.432897	-0.432897	0.293406	-0.0798033	-0.432897	-0.432626	-0.432824	-0.432897	-0.432897	-0.432827	-0.16647	1.13149	-0.432897	-0.432897	-0.432868	-0.432875	-0.169997
0c0dccc9621a59b6d8a92b3d540e3597	-0.755559	-0.365078	1.82699	1.2774	-0.50469	-0.75555	-0.388322	1.32843	-0.121137	0.0441459	-0.755559	-0.755559	3.05956	-0.210122	2.30759	-0.755559	-0.755559	-0.755559	-0.755559	-0.185287	-0.755559	1.10002	-0.755463	0.385185	0.125553	-0.503115	0.766453	-0.755559	0.0256124	0.312837	-0.459895	-0.75553	-0.755549
8d16493f61b4859028a7a760a82751ce	-0.318705	-0.318705	-0.318496	-0.318435	-0.318705	4.17875	-0.318705	0.695806	-0.318517	1.2928	-0.318705	-0.318705	-0.318705	-0.318624	-0.318668	3.07226	-0.318705	-0.318705	-0.318705	-0.317929	-0.318705	-0.317976	-0.318508	-0.318705	-0.318705	-0.318516	-0.318705	-0.318705	-0.318705	-0.318705	-0.318626	-0.318645	-0.318684
938fbbe51af86d1d7ebd6817a0f0bd24	-0.751114	0.38738	-0.750994	-0.750959	0.202487	0.0696974	0.0814282	0.249429	-0.751006	-0.750853	-0.308055	1.19882	-0.230866	-0.751067	-0.751093	0.140366	1.73124	-0.751114	-0.751114	2.66569	-0.751114	-0.750682	-0.750998	-0.751114	2.18656	0.762479	-0.751114	-0.751114	-0.751114	-0.751114	0.579189	1.3218	1.73003
f4ad92074fc1b41b8ada1a77cc50d272	0.929803	2.00355	-0.57724	-0.328487	1.06318	3.27163	2.18193	-0.065913	1.19494	-0.31107	-0.48582	-0.577304	-0.322936	-0.125065	-0.161212	-0.577304	-0.577304	-0.577304	-0.577304	-0.577061	-0.577304	-0.577077	-0.577243	-0.577304	-0.577304	-0.577245	-0.577304	1.58367	-0.0374436	-0.577304	-0.577279	-0.577285	-0.577297
cfdf39cd6545fb6a7ddb747c3393c225	-0.460152	1.60951	-0.460078	-0.460057	-0.460152	-0.460145	-0.460152	-0.460036	-0.460086	-0.459991	-0.460152	-0.460152	-0.0744244	1.76363	-0.460139	1.87594	-0.460152	-0.460152	-0.460152	-0.459866	-0.460152	3.83745	-0.460081	1.48567	-0.460152	-0.460083	-0.460152	0.354867	0.650151	-0.460152	-0.460124	-0.46013	-0.460145
4ebcf74b2783b601ceaf1ca7a994420a	-0.769783	-0.769783	-0.116694	1.0269	-0.486289	-0.769779	-0.769783	2.76723	0.345794	0.57882	-0.769783	-0.769783	0.138261	-0.769765	3.00943	1.59245	-0.769783	-0.769783	-0.204996	-0.652897	0.497391	0.640219	-0.184784	0.110229	-0.281541	-0.660839	1.28331	-0.630918	-0.769783	-0.769783	-0.769765	0.331428	0.134855
707740d13076516032127f753473cfc3	0.54137	2.28161	1.74403	-0.515082	0.974494	-0.515227	1.11096	-0.515049	-0.515129	-0.514975	-0.515238	-0.515238	-0.515238	3.66627	0.47801	-0.515238	-0.515238	-0.515238	-0.515238	0.724389	-0.515238	-0.514812	0.843231	-0.515238	-0.515238	-0.515128	-0.515238	-0.515238	-0.515238	-0.515238	-0.515192	-0.515203	-0.515226
bf34422106e5974ddf75216e2c05273c	0.700802	1.06898	-1.03858	-0.447891	-0.235186	2.05349	0.583701	-0.231063	0.12221	-1.03842	0.702809	-1.03871	0.363064	2.17731	-1.03869	0.69405	0.613458	-1.03871	-1.03871	-1.0382	-1.03871	1.88172	0.453565	-1.03871	-1.03871	-0.575616	0.449056	1.24475	-1.03871	-1.03871	0.0385419	0.685436	0.120429
5284495840f983847ec0d0b741a9a471	-0.487535	3.19524	-0.487485	-0.487471	-0.124477	1.0892	-0.487535	-0.487457	1.34043	-0.12529	0.12365	-0.487535	-0.126225	3.59773	0.764774	-0.487535	-0.487535	-0.487535	-0.487535	-0.487346	-0.487535	-0.487359	0.194773	0.418647	-0.487535	-0.487489	-0.487535	-0.487535	-0.487535	-0.110862	-0.487516	-0.48752	-0.48753
610fec3c1f64661f446a6e8270f23d0c	-0.812132	-0.812132	-0.812066	0.521278	0.573058	1.50987	-0.812132	1.16444	0.871675	1.03413	-0.812132	0.0943287	0.552696	0.761729	1.9224	-0.812132	0.384875	-0.812132	-0.812132	-0.811878	2.2101	-0.811896	-0.812069	1.20838	-0.812132	-0.812071	1.72451	0.0841641	-0.812132	-0.812132	-0.812107	-0.812113	-0.812125
00edbd1ba8dcda99fa8c48ebbad76bc3	0.607116	0.428563	-0.0423748	-0.631049	-0.631193	-0.631182	-0.631193	-0.631019	-0.631093	-0.630951	0.19448	0.696133	-0.631193	-0.63115	-0.631173	-0.631193	0.795384	1.74959	-0.631193	-0.630761	-0.631193	-0.630792	-0.631085	0.356119	2.21244	-0.631089	0.929395	0.331049	3.55069	0.813407	-0.63115	-0.63116	-0.631181
f5bf7ef226b458f24103a3531394ec7d	1.13763	1.99854	-0.423591	-0.423549	-0.423736	1.43867	4.29976	-0.423509	-0.0302175	-0.423421	1.23993	0.242575	-0.423736	-0.42368	-0.423711	-0.423736	-0.423736	-0.423736	-0.423736	-0.423249	-0.423736	-0.42327	-0.423609	-0.423736	-0.423736	-0.423614	0.264242	-0.423736	-0.423736	-0.423736	-0.423685	-0.423697	-0.423722
acf76b1f22c9536ca982df6f9b0219da	1.51981	2.10335	-0.487797	0.105437	-0.487852	3.31339	-0.487852	-0.487766	-0.0918622	-0.487733	-0.487852	-0.487852	0.355074	-0.487831	-0.487843	-0.487852	-0.487852	-0.487852	-0.487852	-0.487641	-0.487852	-0.487656	2.87623	0.259793	-0.487852	-0.487801	-0.487852	0.501947	0.276636	-0.487852	-0.487831	-0.487836	-0.487846
1ece08fa5a366f1361e7ea04639f1c4f	-0.504704	-0.504704	-0.504658	0.780974	-0.504704	-0.504699	-0.504704	-0.417475	0.384063	-0.362892	-0.504704	-0.504704	-0.386954	0.96431	-0.504696	-0.504704	-0.504704	-0.504704	2.13119	1.96099	0.459412	-0.504541	-0.50466	-0.504704	2.92358	2.66598	-0.504704	-0.504704	-0.504704	-0.504704	-0.504686	-0.50469	-0.504699
1eeda6a9e8ebf5b66a6506ec39ce3f2a	0.0631411	0.12858	-1.19321	0.127794	1.15015	-1.1936	0.741261	-1.19297	0.239223	0.00670604	-0.222039	0.373885	-1.19364	-1.19347	-1.19357	1.88071	1.95105	1.66243	0.541007	-1.19199	-1.19364	0.559756	0.559949	-1.19364	1.61982	0.228833	1.06468	-0.0414504	-0.49255	-0.103934	-0.556167	0.450481	-1.1936
da47a7f676f9a37da03e64a99251fd78	-0.249722	-0.249722	-0.249722	-0.249722	-0.249722	-0.249722	-0.249722	-0.249722	-0.249722	-0.249722	-0.249722	-0.249722	-0.249722	-0.249722	-0.249722	-0.249722	-0.249722	-0.249722	-0.249722	-0.245807	-0.249722	-0.24601	-0.248714	-0.249722	-0.249722	-0.248757	4.1715	-0.249722	-0.249722	-0.249722	-0.249319	-0.249414	3.55957
9b5811da3588dc72c1fce3ea07d51eac	-0.908966	-0.908966	2.96177	0.56541	-0.113818	-0.908959	-0.908966	1.38591	0.419812	-0.545907	-0.908966	-0.908966	0.306462	1.71388	2.32671	-0.0669922	-0.908966	0.892265	-0.908966	0.23275	-0.331637	0.907322	-0.325792	-0.143545	-0.471018	-0.431408	0.858397	-0.908966	0.0376091	-0.280152	-0.908937	-0.808569	0.000165463
153c93e302c4700f4c3515546aa47a1f	0.48308	-0.619464	-0.619307	1.31054	3.06975	-0.61945	-0.619464	-0.619218	-0.619323	-0.619121	-0.102634	1.25197	1.51109	-0.619403	-0.619437	0.691105	-0.619464	-0.619464	-0.619464	-0.618859	-0.619464	-0.618901	-0.619313	-0.619464	-0.619464	0.480584	0.598729	2.46932	-0.619464	0.000165121	1.24267	-0.619418	-0.619448
e04cb8c96d35fee0e181a15fc4511d0c	0.263834	2.1684	-0.931926	-0.563373	0.146478	-0.133902	-0.932058	0.764113	-0.41251	-0.93177	-0.199268	-0.0983848	-0.588082	-0.427043	0.00578795	0.640045	-0.53064	0.320202	-0.932058	-0.931547	0.70653	1.13944	1.59117	3.51973	-0.932058	-0.931935	-0.00823412	-0.146329	-0.157244	0.406485	-0.019797	-0.932019	-0.932045
03a1f9f63e2fa6c7bdf27d33eba2b09d	-0.254038	1.04012	-0.19667	-0.24645	0.0308831	-0.249408	1.45282	-0.64919	-0.64925	-0.177875	-0.13005	0.0298483	1.38787	3.61344	-0.649316	-0.649332	-0.649332	-0.649332	-0.649332	-0.648984	-0.649332	-0.649008	-0.0839118	2.3931	-0.649332	-0.649248	-0.649332	0.639368	0.645061	0.494131	-0.649297	-0.649305	-0.649322
0df6c802966e8670279671824da4f10a	-0.623638	-0.623638	0.929114	0.173729	-0.623638	-0.623622	1.16248	4.12335	-0.623486	-0.623271	-0.623638	0.192522	-0.623638	-0.0726655	0.522285	-0.123651	-0.623638	-0.623638	0.546964	0.634055	0.093109	-0.623037	-0.0441422	2.20989	-0.623638	-0.623482	-0.203826	-0.623638	0.417379	-0.623638	0.0398955	-0.623588	-0.62362
6397b20a49248172fe4f03c91a114738	0.210738	0.196549	-0.908541	-0.885602	-0.864431	0.90813	1.19941	-0.57938	-0.471293	-0.578208	0.0131754	-0.405049	-1.30374	-0.541944	-0.336069	0.225236	1.72037	3.1677	1.32883	-1.24319	1.06492	1.15848	-0.391836	0.316273	0.473682	-1.5834	-0.394572	0.0794773	0.44025	0.278881	-0.809146	-0.992603	-0.493099
97fbd9fac072dc24ef7af2e143df17a1	-0.407427	-0.407427	-0.407333	-0.407305	-0.407427	-0.407418	-0.407427	-0.40728	-0.407342	-0.407222	-0.407427	-0.407427	-0.407427	1.96298	1.44199	-0.407427	-0.407427	-0.407427	2.5	-0.407063	-0.407427	-0.407089	-0.407336	2.61242	-0.407427	-0.407339	-0.407427	-0.407427	-0.407427	2.88895	-0.407391	-0.407399	-0.407417
98f7a3ab6c00ede77b927f2239576bac	-0.269361	-0.269361	-0.269361	-0.269361	-0.269361	-0.269361	-0.269361	-0.269361	-0.269361	-0.269361	-0.269361	-0.269361	-0.269361	-0.269361	-0.269361	3.98194	0.0140672	0.0690192	-0.269361	-0.269301	-0.269361	3.74635	-0.269346	-0.269361	-0.269361	-0.269347	-0.269361	-0.269361	-0.269361	-0.269361	-0.269355	-0.269357	-0.26936
4bd8c904977a197107f51a59ebac2fb9	0.0452871	-0.625822	-0.625669	-0.625625	-0.176774	-0.625808	-0.625822	-0.625583	-0.625685	3.74072	-0.0909133	0.0808732	-0.625822	-0.625763	-0.625795	0.787562	0.0263758	1.4813	0.441033	-0.625232	-0.625822	-0.625273	0.334163	1.38712	-0.625822	-0.62568	-0.625822	0.832726	1.12222	1.8767	-0.625763	-0.625777	-0.625806
634e293920d238dfa24961d096247760	-0.0660996	-0.154873	-0.0281802	-1.03722	-0.410777	-1.03742	-0.493938	-1.03718	-1.03729	-0.284653	-0.73054	-0.270431	-0.921997	-0.810264	-1.03741	0.051011	1.44388	-1.03744	2.01063	2.22323	0.251836	-0.360395	-0.255907	-0.040528	2.38628	1.87012	-0.539053	-0.246073	-0.387159	-0.00777294	0.152123	1.20375	0.639727
683282878b7ef2a87187bc3172b91f97	0.241989	0.29281	-0.644	0.334176	-0.644158	-0.644143	-0.644158	-0.643912	-0.644016	-0.643816	-0.644158	-0.179135	-0.644158	-0.644097	-0.64413	0.448261	0.327254	0.490719	1.57962	2.42734	3.25527	-0.643584	-0.644003	-0.644158	1.65133	1.24764	-0.644158	-0.644158	-0.644158	-0.644158	-0.644096	0.00139751	0.118538
1f6f400a4c40ce9f7cea0e7145938045	-0.720506	2.0396	-0.72006	-0.719932	-0.720506	1.99265	-0.720506	-0.71981	-0.720106	1.62278	0.200473	-0.720506	0.214932	1.36368	-0.0827401	1.41711	-0.720506	-0.720506	-0.720506	-0.718804	-0.720506	-0.718917	0.686286	-0.720506	-0.720506	-0.0218959	0.513025	-0.720506	0.742565	-0.720506	-0.720335	2.40518	0.590392
8fd618f97a48e4eb208b0445dbb10d8c	1.00314	1.0823	-0.513686	1.00711	1.66156	4.08969	-0.513945	-0.51354	-0.513712	-0.513382	-0.513945	-0.513945	-0.513945	-0.513845	-0.5139	1.65183	0.513556	-0.513945	0.342475	-0.512975	-0.513945	-0.513036	-0.5137	-0.513945	-0.513945	-0.51371	-0.513945	0.104009	-0.513945	-0.513945	-0.513847	0.360977	-0.513919
6b8307a0222360f36caf7065c78ff424	0.210738	0.196549	-0.908541	-0.885602	-0.864431	0.90813	1.19941	-0.57938	-0.471293	-0.578208	0.0131754	-0.405049	-1.30374	-0.541944	-0.336069	0.225236	1.72037	3.1677	1.32883	-1.24319	1.06492	1.15848	-0.391836	0.316273	0.473682	-1.5834	-0.394572	0.0794773	0.44025	0.278881	-0.809146	-0.992603	-0.493099
e15409a395527f26caea7d4aec5b9970	-0.125547	-0.928111	2.04572	0.52896	0.510896	0.290208	-0.928111	-0.927681	-0.927864	-0.927514	1.84237	1.40819	-0.928111	-0.928005	-0.928063	0.29865	1.41525	-0.928111	-0.928111	-0.927054	1.20344	-0.927127	-0.927846	0.641559	0.509092	-0.927856	-0.928111	0.78919	-0.928111	0.61941	0.767186	0.986236	1.11497
2fa0305cd3ff0c4007a78fec9a60cdf9	-0.452103	2.68568	-0.452068	-0.452058	-0.452103	-0.4521	-0.251443	-0.452048	-0.452071	-0.452026	-0.452103	-0.452103	-0.452103	-0.452089	-0.452097	-0.452103	-0.452103	0.529528	-0.452103	-0.451967	-0.452103	0.281377	3.32663	-0.452103	-0.452103	0.897188	-0.452103	1.78109	2.05209	-0.452103	-0.452089	-0.452093	-0.452099
0e6645acd71bc7e1dc285638b8c3b44b	-0.305537	-0.305537	0.872604	-0.305469	5.19374	-0.305532	-0.305537	0.419641	-0.30549	0.316091	-0.305537	-0.305537	-0.0137013	-0.0903779	1.24584	-0.305537	-0.305537	-0.305537	-0.305537	-0.305537	-0.305537	-0.305537	-0.305537	-0.305537	-0.305537	-0.305537	-0.305537	-0.305537	-0.305537	-0.305537	-0.305537	-0.305537	-0.305537
b301115074f6e3de36efa48b692c7f8b	1.35859	-0.450986	0.29199	-0.450746	-0.450986	1.59028	-0.450986	-0.450695	-0.450818	-0.450581	-0.450986	0.916283	-0.450986	-0.450914	-0.450953	0.83355	0.634105	-0.450986	-0.450986	-0.45027	-0.450986	4.33594	1.31167	-0.450986	-0.450986	-0.450813	-0.450986	-0.450986	-0.450986	-0.450986	-0.450914	-0.450931	-0.450967
54dcb911e3ab04e9d5b30c3912100b41	-0.605378	1.93002	-0.605322	-0.186151	1.45766	-0.605373	0.440995	0.413302	1.70086	-0.605256	0.607998	0.732648	-0.605378	1.73522	0.0269949	3.38793	-0.605378	-0.605378	-0.605378	-0.605163	-0.605378	-0.605178	-0.605324	-0.605378	-0.605378	-0.605327	-0.605378	-0.605378	-0.605378	-0.605378	0.177154	-0.317773	-0.605372
5a483930ae687501d239547148452dec	-0.45769	-0.45769	-0.457634	1.34971	1.63088	-0.457685	-0.45769	-0.457603	0.246196	-0.457569	-0.45769	-0.45769	-0.45769	0.14753	-0.0957206	-0.45769	-0.45769	-0.45769	-0.45769	-0.457475	-0.45769	-0.45749	-0.457636	-0.45769	-0.0593626	0.328234	0.871257	-0.45769	-0.45769	-0.45769	1.8109	4.2965	-0.457684
e61b52cd3ace83b9a3515c17c6438a87	-0.143351	-0.515348	0.761971	-0.515265	2.97889	0.0491248	-0.515348	-0.0653315	-0.51529	-0.515208	-0.515348	-0.515348	-0.515348	0.110752	2.01699	-0.515348	-0.515348	-0.515348	-0.515348	0.868746	-0.515348	1.22273	-0.515286	-0.515348	0.338007	-0.515288	-0.515348	3.19866	-0.515348	-0.515348	-0.515323	-0.515329	-0.515341
25f537c4856de1617e682de90caba215	-0.279738	-0.279738	-0.279674	0.220838	-0.279738	-0.279732	-0.279738	-0.279638	-0.27968	-0.279599	-0.279738	-0.279738	-0.279738	-0.279713	-0.279727	-0.279738	-0.279738	-0.279738	-0.279738	-0.27948	0.989226	5.30116	-0.279673	-0.279738	-0.279738	-0.279676	-0.279738	0.554804	-0.279738	-0.279738	-0.164362	0.650461	-0.279731
ce54b572b93affd7afe291853b517e21	2.45641	-0.337186	-0.336958	-0.336892	-0.337186	-0.337165	-0.337186	-0.33683	0.719096	-0.336691	-0.337186	-0.337186	-0.337186	-0.337098	-0.337146	-0.337186	2.8633	-0.337186	-0.337186	-0.336309	-0.337186	-0.336366	-0.336965	-0.337186	-0.337186	-0.336974	-0.337186	-0.337186	-0.337186	3.73576	-0.337098	-0.337119	-0.337162
b358d76cf51dad99d526470074e5f31c	-0.364529	-0.364529	-0.364448	1.63174	-0.364529	-0.364522	0.687366	-0.364403	1.55735	-0.364353	-0.364529	0.455718	0.822749	4.68695	-0.364515	-0.364529	-0.364529	-0.364529	-0.364529	-0.364529	-0.364529	-0.364529	-0.364529	-0.364529	-0.364529	-0.364529	-0.364529	-0.364529	-0.364529	-0.364529	-0.364529	-0.364529	-0.364529
881827d013845a8d4e929224f9fd24e1	4.24409	1.10204	-0.404481	-0.404456	-0.40457	1.51815	-0.40457	-0.404431	-0.40449	-0.404377	-0.40457	-0.40457	-0.40457	-0.404536	-0.404554	-0.40457	-0.40457	-0.40457	-0.40457	-0.40423	-0.40457	-0.404254	1.86417	-0.40457	-0.40457	-0.404488	-0.40457	-0.40457	0.805576	1.38789	-0.404536	-0.404544	-0.404561
6ad914e7f81c311b1d7c7921bb90c92e	0.210738	0.196549	-0.908541	-0.885602	-0.864431	0.90813	1.19941	-0.57938	-0.471293	-0.578208	0.0131754	-0.405049	-1.30374	-0.541944	-0.336069	0.225236	1.72037	3.1677	1.32883	-1.24319	1.06492	1.15848	-0.391836	0.316273	0.473682	-1.5834	-0.394572	0.0794773	0.44025	0.278881	-0.809146	-0.992603	-0.493099
ea9c1edfdf60a0a532f516b20689e41b	-1.05317	-1.05317	0.672269	-1.05276	-0.368644	-1.05314	1.08503	-1.05267	-1.05288	-1.05247	-0.113103	0.455435	-0.712591	-1.05305	-0.0314304	1.86607	2.23245	-1.05317	-1.05317	0.115552	0.721492	-1.052	-0.540408	0.253464	1.4046	-0.607718	0.662241	0.892254	1.6115	1.24806	0.156985	0.416137	0.162035
4ed1b5cf2300afb72f7fb97ec6ff2e9e	0.210738	0.196549	-0.908541	-0.885602	-0.864431	0.90813	1.19941	-0.57938	-0.471293	-0.578208	0.0131754	-0.405049	-1.30374	-0.541944	-0.336069	0.225236	1.72037	3.1677	1.32883	-1.24319	1.06492	1.15848	-0.391836	0.316273	0.473682	-1.5834	-0.394572	0.0794773	0.44025	0.278881	-0.809146	-0.992603	-0.493099
17e3b0c68a0c50a547dd9db57d609a89	0.135809	1.51504	-0.359201	-0.35918	-0.359275	3.61945	3.61693	-0.35916	-0.359209	-0.359114	-0.0564629	-0.359275	-0.359275	-0.359247	-0.359262	-0.359275	-0.359275	0.166017	-0.359275	-0.359006	-0.359275	-0.359022	-0.359207	-0.359275	-0.359275	-0.35921	-0.359275	0.343106	-0.359275	-0.359275	-0.359248	-0.359254	-0.359268
aa72cb690f877a365de8223b4466671b	-0.453487	0.0758961	-0.453392	-0.00402585	-0.453487	2.67686	2.64491	-0.453339	-0.453402	-0.453281	-0.16164	-0.453487	-0.272516	-0.45345	-0.45347	-0.453487	0.556443	0.400015	-0.453487	-0.453122	-0.453487	-0.453148	3.55119	-0.453487	-0.453487	-0.453399	-0.453487	0.251232	0.256896	-0.453487	-0.453451	-0.453459	-0.453477
3dfaa3fabdf04711351c97af550d2921	-0.456176	-0.456176	0.747282	1.25766	0.788874	-0.456157	-0.456176	2.53451	3.91953	-0.455743	0.398936	-0.456176	1.4025	-0.456099	-0.456141	-0.456176	-0.456176	-0.456176	0.352913	-0.455579	-0.456176	-0.455591	-0.456015	-0.456176	-0.456176	-0.456023	-0.456176	-0.456176	-0.456176	-0.456176	-0.456111	-0.456126	-0.456158
92b8a97dbdde7cd3517311bf75a93a25	1.03816	0.763508	2.05417	-0.793828	-0.210739	-0.794241	-0.794273	-0.793734	-0.793963	-0.793524	-0.794273	0.136182	-0.794273	-0.794139	-0.794213	0.760901	1.32659	2.34495	-0.794273	0.945711	-0.794273	-0.79303	-0.793938	-0.0985461	1.36945	-0.793951	-0.794273	0.656898	-0.794273	1.36397	-0.794139	0.693206	1.14821
3b0473ef9ba7bd7b0c6470c361915ebb	0.210738	0.196549	-0.908541	-0.885602	-0.864431	0.90813	1.19941	-0.57938	-0.471293	-0.578208	0.0131754	-0.405049	-1.30374	-0.541944	-0.336069	0.225236	1.72037	3.1677	1.32883	-1.24319	1.06492	1.15848	-0.391836	0.316273	0.473682	-1.5834	-0.394572	0.0794773	0.44025	0.278881	-0.809146	-0.992603	-0.493099
1dacfff5549a7d2494f6a935ea1fb7e8	0.740645	0.218947	-0.750717	-0.750658	-0.75092	1.3062	0.918446	-0.487908	-0.750738	-0.750478	0.719125	-0.75092	-0.112551	-0.193026	-0.750885	0.160512	-0.75092	-0.75092	-0.75092	-0.457819	-0.75092	-0.750188	0.8486	-0.226465	-0.41742	-0.750731	0.371553	1.43653	3.84364	-0.75092	0.35756	0.120927	1.36335
693c980645f0af912893409ceee83c7e	-0.33064	-0.33064	-0.330559	-0.330535	-0.33064	1.23605	-0.33064	-0.330513	-0.330567	-0.330463	-0.33064	-0.33064	1.10441	5.04461	-0.330626	-0.33064	-0.33064	0.708092	-0.33064	-0.330336	-0.33064	-0.330355	-0.330563	0.364122	-0.33064	-0.330566	-0.33064	-0.33064	-0.33064	0.468627	-0.330609	-0.330617	-0.330632
ee766857ab5fc018ac26632146bc90e1	-0.842328	-0.842328	0.858857	-0.842009	-0.842328	-0.842305	1.38707	1.22701	-0.842106	0.366443	-0.842328	-0.842328	0.621747	-0.842232	-0.842285	1.51891	1.11998	-0.842328	-0.842328	-0.841372	0.984126	-0.841439	0.323128	0.715115	2.31826	0.795793	0.830203	-0.842328	-0.842328	-0.842328	-0.842233	1.55278	0.539849
f23d98130c516c32690c5f724acf5d83	2.18618	-0.431565	-0.431501	-0.431482	-0.431565	-0.431559	-0.431565	-0.431464	-0.431507	-0.431425	0.42311	-0.431565	-0.431565	-0.43154	-0.431554	1.69344	2.81301	2.95627	-0.431565	-0.431314	-0.431565	-0.431332	-0.431503	-0.431565	-0.431565	-0.431505	-0.431565	-0.431565	-0.431565	1.57911	-0.43154	-0.431546	-0.431559
e1f3dca7a444e322745b21064cf6fbd2	-0.498712	-0.498712	0.214729	-0.498485	-0.498712	-0.498696	-0.498712	-0.498436	-0.498553	-0.498329	-0.498712	-0.498712	-0.498712	0.584477	0.116083	2.23962	2.74503	3.01027	-0.498712	-0.49802	-0.498712	-0.498068	-0.498538	1.56225	-0.498712	-0.498545	-0.498712	-0.498712	0.26551	1.22824	-0.498643	-0.498659	-0.498694
6aaac37f56d07ffcea4fe9ef1cd00d2f	0.960787	2.31044	0.829703	-0.669346	-0.669475	-0.669466	1.73352	1.28227	2.67599	-0.252864	0.354977	-0.669475	0.0227317	-0.669436	-0.669458	-0.669475	-0.669475	-0.669475	-0.669475	-0.669092	-0.669475	-0.669119	1.07796	-0.669475	-0.669475	-0.669383	-0.19648	1.79175	0.305105	-0.669475	-0.669437	-0.176931	-0.669465
a2059dc1d1825bb8a0a039915d189ef8	-0.440363	-0.440363	-0.440309	-0.440294	-0.440363	-0.440358	-0.440363	-0.440279	0.871515	-0.440247	-0.440363	-0.440363	-0.440363	0.408043	-0.440353	-0.440363	-0.440363	-0.440363	-0.440363	-0.440155	0.681381	-0.44017	-0.440311	-0.440363	-0.440363	1.53733	4.04419	-0.440363	-0.440363	-0.440363	0.299728	2.56834	0.597754
891ead276ce87c2a025c7cac865eac93	0.210738	0.196549	-0.908541	-0.885602	-0.864431	0.90813	1.19941	-0.57938	-0.471293	-0.578208	0.0131754	-0.405049	-1.30374	-0.541944	-0.336069	0.225236	1.72037	3.1677	1.32883	-1.24319	1.06492	1.15848	-0.391836	0.316273	0.473682	-1.5834	-0.394572	0.0794773	0.44025	0.278881	-0.809146	-0.992603	-0.493099
a927fa934cf9d977992764c4dcba0b7d	0.963692	-0.427128	-0.427017	-0.426985	-0.427128	3.0515	-0.427128	-0.426955	-0.427029	-0.426888	-0.427128	0.567537	-0.427128	-0.427085	-0.427109	-0.427128	-0.427128	2.62024	-0.427128	-0.426703	-0.427128	-0.426732	-0.427021	-0.427128	2.54054	-0.427025	-0.427128	-0.427128	-0.427128	1.787	-0.427085	-0.427095	-0.427116
8da18b476b64f6f053647455b6890f80	-1.06623	1.13697	0.876528	-1.06589	-1.06623	-0.113061	1.08218	0.791121	2.74981	-1.06565	0.662662	-1.06623	0.850942	1.3744	-0.319522	0.811042	0.0527151	-0.195153	0.0894059	-1.06522	0.360371	-0.300851	0.827623	-1.06623	-1.06623	-0.0444307	-1.06623	-1.06623	-1.06623	-1.06623	0.684485	1.29562	0.119941
ad235b65ccb597f05a96b06c0ad90eee	-0.298863	-0.298863	-0.298863	-0.298863	-0.298863	-0.298863	-0.298863	-0.298863	-0.298863	-0.298863	-0.298863	-0.298863	-0.298863	-0.298863	-0.298863	3.96987	3.24215	-0.298863	-0.298863	-0.296374	-0.298863	-0.296518	-0.298227	-0.298863	-0.298863	-0.298254	1.74726	-0.298863	-0.298863	-0.298863	-0.298609	-0.298669	-0.298794
84135a0b2ffd4bf0902d223d4ee001dc	0.757575	1.3436	-0.694685	-0.694591	-0.278743	-0.694982	0.930722	-0.694501	0.00744319	-0.694302	0.0534262	-0.212468	-0.407294	-0.694886	-0.694955	1.5742	0.817379	-0.695013	-0.695013	-0.693748	-0.695013	1.61658	1.90033	0.629824	-0.695013	-0.694707	-0.695013	0.685557	3.08809	-0.695013	-0.694886	-0.694916	-0.694979
405600e715167b5f59ca7a6438a970e2	-0.121565	0.918927	-0.83339	-0.83329	-0.833738	-0.833706	-0.121734	-0.833194	0.748261	-0.832982	0.311575	0.604822	3.46459	0.97501	-0.833678	0.410613	0.968981	-0.833738	-0.833738	1.15358	-0.833738	-0.832496	1.78634	-0.13782	-0.833738	0.0472557	-0.833738	0.929054	0.415806	-0.0494985	0.198315	-0.833636	-0.833703
3ee3085cd6f25c2449332df3675b9eee	-0.305744	-0.172869	0.268181	0.272218	-0.0918852	-0.517859	-0.517866	-0.517752	-0.517801	-0.517708	-0.517866	-0.517866	-0.517866	0.454254	-0.517853	-0.517866	-0.517866	-0.517866	-0.517866	-0.517584	-0.517866	0.790577	2.28106	0.519586	-0.517866	1.98051	4.05708	-0.25853	0.0505098	-0.292973	-0.231059	-0.517844	-0.517858
234166274fbb22e38900a26eb84ece58	1.67095	0.968173	0.310639	-0.637292	-0.299206	1.89477	1.27068	-0.637242	-0.637362	-0.637133	0.543749	0.0163615	-0.637523	-0.637454	-0.0253634	-0.637523	-0.637523	-0.637523	-0.637523	-0.636837	-0.637523	-0.636884	-0.637351	0.234071	-0.637523	-0.637358	-0.637523	1.12575	2.99317	2.04378	-0.637455	-0.637471	-0.637505
f5e65944985d39991cba3fab949a0150	-0.0226114	2.0206	1.45994	3.45255	-0.611965	1.28583	0.579605	-0.611613	-0.611763	-0.611476	0.217315	0.368179	-0.611965	-0.611878	-0.611925	0.389406	-0.611965	-0.611965	-0.611965	-0.611121	-0.611965	-0.611175	-0.611751	1.50407	-0.611965	-0.61176	-0.611965	0.522625	1.07035	-0.611965	-0.61188	-0.6119	-0.611942
c220411c349b8a75624ff17ef6fd3923	-0.447782	-0.447782	-0.447708	0.34321	-0.447782	-0.447775	-0.447782	1.37309	3.88423	-0.447622	-0.447782	-0.447782	1.40842	2.84814	-0.447769	0.331547	-0.0938063	-0.447782	-0.447782	-0.447506	-0.447782	-0.447524	-0.447712	0.279445	0.00375995	-0.447715	-0.447782	-0.0800386	-0.447782	-0.447782	-0.447754	-0.44776	-0.447774
f7799679d96d83cb801a28d2bea7e038	-0.185541	-0.185541	-0.185447	-0.185421	-0.185541	5.55847	-0.185541	-0.185395	-0.185457	-0.185338	-0.185541	-0.185541	-0.185541	-0.185505	-0.185524	-0.185541	-0.185541	-0.185541	-0.185541	-0.185212	-0.185541	-0.185229	-0.185456	-0.185541	-0.185541	0.191797	-0.185541	-0.185541	-0.185541	-0.185541	-0.185507	-0.185515	-0.185531
515ece14bce1a14e906c0282d86acb76	-0.351631	-0.351631	-0.351573	-0.351556	-0.351631	-0.351626	-0.351631	-0.35154	-0.351579	-0.351505	0.212976	-0.351631	-0.351631	-0.351608	-0.351621	-0.351631	-0.351631	-0.351631	-0.351631	-0.351396	-0.351631	-0.351413	-0.351572	-0.351631	-0.351631	2.3436	-0.351631	-0.351631	-0.351631	-0.351631	0.61974	3.77178	2.89661
8ac6eb8f6cb6cb09ec627e2a9cc972bd	1.4811	1.99371	-0.570917	-0.570884	-0.571031	0.75263	-0.571031	-0.570853	-0.570929	-0.570784	-0.571031	-0.571031	0.57007	-0.570987	1.32746	0.0694122	-0.571031	-0.571031	1.00724	3.74495	-0.571031	-0.570623	-0.570921	-0.571031	0.613751	0.705618	-0.571031	-0.571031	-0.571031	-0.571031	0.295342	-0.570997	-0.571019
f417c17862db401c41c77faea54cc3c3	-0.174255	-0.174255	-0.174255	-0.174255	-0.174255	-0.174255	-0.174255	-0.174255	-0.174255	-0.174255	-0.174255	-0.174255	-0.174255	-0.174255	-0.174255	-0.174255	5.57048	-0.174255	-0.174255	-0.172139	-0.174255	-0.172232	-0.173703	-0.174255	-0.174255	-0.173728	-0.174255	-0.174255	-0.174255	-0.174255	-0.174034	-0.174086	-0.174195
958d78a02bef69a795806f97adb117ea	0.962121	-0.316386	-0.31618	-0.31612	-0.316386	-0.316367	-0.316386	3.02223	-0.316201	-0.315938	-0.316386	-0.316386	-0.316386	-0.316306	-0.31635	-0.316386	-0.316386	-0.316386	-0.316386	-0.315605	-0.316386	4.26448	-0.316188	-0.316386	-0.316386	-0.316196	-0.316386	0.923791	-0.316386	-0.316386	-0.316307	-0.316326	-0.316365
e2bc41d7bb14564d77567a24bb117ee7	-0.423098	-0.423098	0.619629	-0.423016	3.95386	-0.423092	-0.423098	0.743156	-0.423041	1.68359	-0.423098	-0.423098	2.59795	0.377377	1.02484	-0.423098	-0.423098	-0.423098	-0.423098	-0.423098	-0.423098	-0.423098	-0.423098	-0.423098	-0.423098	-0.423098	-0.423098	-0.423098	-0.423098	-0.423098	-0.423098	-0.423098	-0.423098
d93a3ef54cd04d16c30a94e15287caf4	-0.534104	-0.534104	-0.534025	0.578786	0.5309	-0.534096	-0.534104	-0.533981	2.92048	-0.533933	-0.534104	-0.534104	1.32748	-0.534073	-0.53409	-0.534104	-0.534104	-0.534104	-0.534104	-0.5338	-0.534104	-0.533822	-0.534028	-0.534104	-0.534104	-0.534031	0.932113	2.63197	-0.534104	-0.534104	2.16775	1.22352	0.504332
0f2a5acc53e55f2c9f0c7409421dc5a0	-0.690218	1.02654	0.451482	2.2295	0.0721755	0.135072	0.518825	0.844963	1.37523	-0.689721	-0.690218	-0.690218	2.74844	1.98231	-0.0436919	0.0548823	-0.690218	-0.690218	-0.690218	-0.689372	-0.690218	-0.689425	1.51567	-0.690218	-0.690218	-0.690012	-0.690218	-0.690218	0.200223	-0.690218	-0.690132	-0.690152	-0.690195
096aa868afaffdd4bd938b9faa623a2a	-0.2994	-0.2994	-0.2994	-0.2994	-0.2994	-0.2994	-0.2994	-0.2994	-0.2994	-0.2994	-0.2994	-0.2994	-0.2994	-0.2994	-0.2994	3.15092	-0.2994	1.80882	-0.2994	-0.296122	-0.2994	-0.296318	-0.298566	-0.2994	-0.2994	4.0144	-0.2994	-0.2994	-0.2994	-0.2994	-0.299067	-0.299145	-0.299311
3c26b759c265509da510b6b648bae9c3	-0.41732	-0.41732	-0.417263	-0.417246	-0.41732	-0.417314	2.8823	1.34084	1.1195	3.53095	-0.41732	-0.41732	-0.41732	0.646457	1.74745	-0.41732	-0.41732	-0.41732	-0.41732	-0.41732	-0.41732	-0.41732	-0.41732	-0.41732	-0.41732	-0.41732	-0.41732	-0.41732	-0.41732	-0.41732	-0.41732	-0.41732	-0.41732
b9601452981d5393bd6c0ed100a35ff0	-0.248971	-0.248971	-0.248971	-0.248971	-0.248971	-0.248971	-0.248971	-0.248971	-0.248971	-0.248971	-0.248971	-0.248971	-0.248971	-0.248971	-0.248971	-0.248971	-0.248971	-0.248971	-0.248971	-0.245809	-0.248971	-0.245994	-0.248165	-0.248971	4.27731	3.43319	-0.248971	-0.248971	-0.248971	-0.248971	-0.248649	-0.248725	-0.248884
76b219eb7351347070ab7205275b9c02	-0.608601	-0.608601	1.4971	1.13674	-0.608601	1.0934	-0.608601	-0.608356	-0.60846	2.43961	-0.608601	-0.608601	-0.608601	-0.608541	1.74673	-0.608601	-0.608601	-0.608601	-0.608601	-0.608002	-0.608601	1.75297	-0.608451	2.07368	0.97673	-0.608457	1.18989	0.0895138	-0.608601	-0.608601	-0.608541	-0.608555	-0.608585
2616210b023c8ff2ff5ac0c1ae00b1bc	0.264578	0.0847338	0.820313	-0.705902	-0.706061	2.31859	0.802918	-0.705868	-0.147455	-0.705793	-0.0231522	-0.706061	-0.706061	-0.706013	-0.706039	0.209482	-0.144559	-0.706061	-0.706061	-0.705585	-0.706061	-0.204824	3.22522	0.981101	-0.706061	-0.705946	-0.706061	0.392341	0.57773	0.818643	2.02605	-0.706025	-0.706048
c3ff4c29778c6c86865687a4061a3382	-0.174623	-0.174623	-0.174623	-0.174623	-0.174623	-0.174623	-0.174623	-0.174623	-0.174623	-0.174623	-0.174623	-0.174623	-0.174623	-0.174623	-0.174623	-0.174623	-0.174623	-0.174623	-0.174623	-0.167451	-0.174623	-0.167744	-0.172745	-0.174623	-0.174623	5.57048	-0.174623	-0.174623	-0.174623	-0.174623	-0.173871	-0.174048	-0.17442
4115cd19d50e5a6b8550c3a1f9a6c75e	1.11643	-0.563485	-0.563286	0.48782	1.22223	-0.563467	-0.563485	-0.563174	4.2341	0.265663	-0.563485	-0.563485	0.400768	-0.563408	1.01377	0.79415	1.18898	-0.563485	-0.563485	-0.562732	-0.563485	-0.562782	-0.563295	-0.563485	-0.563485	0.129927	-0.563485	-0.563485	-0.563485	-0.563485	1.05041	-0.0733382	-0.563465
48d8be76001a9d251dc030b142483539	2.46263	2.76575	-0.343151	-0.343009	-0.343643	-0.343597	-0.343643	-0.342875	-0.343201	-0.342577	1.00675	-0.343643	-0.343643	-0.343452	-0.343557	-0.343643	-0.343643	-0.343643	-0.343643	-0.341869	-0.343643	-0.341957	-0.343185	-0.343643	-0.343643	-0.343205	-0.343643	3.72205	-0.343643	-0.343643	-0.34346	-0.343503	-0.343594
ce78414357068359ddae6a47b6592a08	0.321926	-0.104197	-0.0693758	-0.783327	-0.783675	0.632778	-0.783675	0.345828	1.42476	-0.783088	-0.11765	-0.783675	1.04796	0.471924	-0.783628	-0.783675	-0.783675	-0.783675	-0.783675	0.0862303	0.579178	3.1419	2.43447	-0.783675	-0.783675	-0.783425	-0.783675	0.503426	-0.783675	-0.479756	-0.31648	1.34252	0.508458
ece8f3889c05b3350152571f8dda9ab7	-0.470639	-0.470639	-0.47031	-0.470215	-0.470639	-0.470608	-0.470639	-0.470125	-0.470343	-0.469925	1.72175	2.84503	-0.470639	-0.470511	1.3256	-0.470639	-0.470639	-0.470639	1.97142	-0.469389	-0.470639	-0.46947	-0.470323	-0.470639	0.617021	-0.470336	-0.470639	-0.470639	-0.470639	2.90739	0.842802	-0.470542	-0.470605
5a84cbca09090824be95118781802f82	-0.494795	0.344512	-0.494503	-0.494419	-0.494795	-0.494767	-0.494795	-0.494339	-0.494532	-0.494162	0.308242	1.54967	-0.494795	-0.494681	-0.494743	-0.494795	-0.494795	-0.494795	-0.494795	1.85945	2.06724	-0.493721	-0.494505	-0.494795	-0.494795	1.78042	-0.494795	-0.494795	-0.494795	-0.494795	-0.494679	1.12465	3.33199
1e66289327edd690ec0ad509d4257101	1.8233	1.07799	-0.486257	-0.486163	-0.486583	-0.486552	-0.486583	-0.486074	2.99693	-0.485876	-0.486583	-0.486583	-0.486583	-0.486456	-0.486526	1.37594	-0.486583	-0.486583	-0.486583	-0.485336	-0.486583	-0.485418	-0.486268	-0.486583	-0.486583	1.04774	-0.486583	-0.486583	2.30562	2.01848	-0.486457	-0.486487	-0.486549
ecb3759e804e8c86d9fb0de817207fe9	-0.401554	2.61083	-0.401322	-0.401254	-0.401554	-0.401533	-0.401554	-0.401191	2.5723	-0.401049	-0.401554	-0.401554	-0.401554	0.749816	-0.401514	0.644132	-0.401554	-0.401554	-0.401554	-0.400673	0.688229	-0.40073	-0.401332	-0.401554	-0.401554	-0.401341	-0.401554	3.57288	-0.401554	-0.401554	-0.401466	-0.401487	-0.401531
8e6f1849d93723676dff6cb1962941a8	-0.463099	-0.463099	0.319303	-0.462925	0.129223	0.893784	-0.463099	-0.462888	-0.462978	-0.462805	0.644718	-0.463099	-0.463099	4.87031	0.34048	-0.0222946	-0.463099	-0.463099	-0.463099	-0.462584	-0.463099	0.632606	-0.46297	0.575751	-0.463099	0.374075	1.18653	-0.463099	-0.463099	-0.463099	-0.463047	-0.220908	-0.463085
1b5aa72a8971f998f5ca89390e6fefb7	-0.325905	-0.325905	-0.325638	-0.325561	-0.325905	-0.32588	-0.325905	1.06054	3.8347	-0.325325	-0.325905	-0.325905	-0.325905	-0.325801	-0.325858	-0.325905	-0.325905	-0.325905	-0.325905	-0.324879	-0.325905	-0.324947	-0.325646	-0.325905	-0.325905	3.44472	-0.325905	-0.325905	-0.325905	-0.325905	-0.325802	-0.325826	1.1075
9afd42dd378444442546f48115a951ec	-0.338512	3.24483	-0.338216	-0.33813	-0.338512	3.62459	-0.338512	-0.338049	-0.338246	-0.337868	2.0534	0.891805	-0.338512	-0.338397	-0.33846	-0.338512	-0.338512	-0.338512	-0.338512	-0.338512	-0.338512	-0.338512	-0.338512	-0.338512	-0.338512	-0.338512	-0.338512	-0.338512	-0.338512	-0.338512	-0.338512	-0.338512	-0.338512
4ae33466f29277f3cba0834c894ee4a4	5.57048	-0.17411	-0.173974	-0.173935	-0.17411	-0.174097	-0.17411	-0.173897	-0.173988	-0.173815	-0.17411	-0.17411	-0.17411	-0.174057	-0.174086	-0.17411	-0.17411	-0.17411	-0.17411	-0.17411	-0.17411	-0.17411	-0.17411	-0.17411	-0.17411	-0.17411	-0.17411	-0.17411	-0.17411	-0.17411	-0.17411	-0.17411	-0.17411
924668f542df9de35c2226e4a6cf09bd	0.100131	0.300985	-0.291844	-0.291831	-0.291887	-0.291883	0.398086	-0.291819	-0.291848	-0.291793	0.0642483	-0.291887	-0.291887	-0.29187	-0.291879	0.249114	-0.291887	-0.291887	-0.291887	-0.291719	-0.291887	5.38482	-0.291845	-0.291887	-0.291887	-0.291846	-0.291887	0.738348	0.0608254	-0.291887	-0.29187	-0.291874	-0.291882
e3811dd729c742150d8c1c5f6e40c5a9	-0.526354	-0.526354	-0.526354	-0.526354	-0.526354	-0.526354	-0.526354	-0.526354	-0.526354	-0.526354	-0.526354	-0.526354	-0.526354	-0.526354	-0.526354	-0.526354	-0.526354	-0.526354	0.611543	2.4342	2.30361	-0.526052	-0.526273	-0.526354	0.460632	1.44587	1.33909	-0.526354	-0.526354	-0.526354	-0.11243	1.35816	2.79145
b9ed1a2c86edb972db7742981e6901da	1.95205	1.93794	-0.744511	0.595028	1.72987	1.78466	-0.744881	-0.744303	0.484589	0.156659	1.83666	-0.0279282	0.730144	-0.744738	-0.744816	-0.744881	-0.744881	-0.744881	-0.744881	1.35152	-0.744881	-0.743581	-0.744529	-0.744881	-0.744881	-0.0271309	0.731624	-0.744881	-0.744881	-0.744881	-0.744741	0.914057	-0.744843
a6ccec9ec008fe4a2f332209583c4012	-0.541058	-0.541058	1.20273	0.424993	0.645447	-0.541029	-0.541058	-0.540571	-0.540778	1.86608	-0.541058	-0.541058	-0.541058	-0.540937	-0.541003	-0.541058	-0.541058	-0.541058	-0.541058	3.26559	1.41152	-0.539934	-0.540755	-0.541058	1.51636	2.02629	-0.541058	-0.541058	-0.541058	-0.541058	0.623854	-0.540965	-0.541025
b155d97b79acc3086ce118451afa0124	-0.468079	1.38675	0.633552	0.484566	-0.468079	-0.468062	-0.468079	0.324218	-0.467909	-0.467665	0.623354	-0.468079	3.41885	2.17349	2.6566	-0.468079	-0.468079	-0.468079	-0.468079	-0.468079	-0.468079	-0.468079	-0.468079	-0.468079	-0.468079	-0.468079	-0.468079	-0.468079	-0.468079	-0.468079	-0.468079	-0.468079	-0.468079
0dd0551c0dd279c12d8a31ad016f0a7b	0.154821	-0.655816	-0.655694	2.13699	-0.655816	-0.655804	-0.655816	1.66866	0.950228	-0.655552	-0.655816	-0.655816	0.915889	-0.655769	2.18899	-0.655816	-0.655816	-0.655816	1.33523	0.849397	-0.655816	-0.655383	-0.655699	-0.655816	0.211738	-0.0460188	2.29927	-0.655816	-0.655816	-0.655816	-0.655769	-0.65578	1.10586
a11124bead20d177c53e9a515457c0c0	-0.492637	0.225155	-0.492465	-0.492416	-0.492637	-0.492621	-0.492637	-0.492369	1.26926	-0.492264	-0.492637	-0.492637	1.2927	3.29659	-0.492607	2.67006	-0.492637	-0.492637	1.518	-0.491982	-0.492637	-0.492026	-0.492472	-0.492637	-0.492637	-0.492478	-0.492637	-0.492637	1.35077	-0.492637	0.690641	-0.492586	-0.492619
d38b6fe0cdccc979c0b8720e3d5f39f5	-0.174129	-0.174129	5.57048	-0.173805	-0.174129	-0.174106	-0.174129	-0.173736	-0.173903	-0.173583	-0.174129	-0.174129	-0.174129	-0.174032	-0.174085	-0.174129	-0.174129	-0.174129	-0.174129	-0.174129	-0.174129	-0.174129	-0.174129	-0.174129	-0.174129	-0.174129	-0.174129	-0.174129	-0.174129	-0.174129	-0.174129	-0.174129	-0.174129
3ab2e807caf3d5ad8b24c4e6220d6b21	-0.305233	-0.305233	-0.305233	-0.305233	-0.305233	-0.305233	-0.305233	-0.305233	-0.305233	-0.305233	-0.305233	-0.305233	-0.305233	-0.305233	-0.305233	-0.305233	-0.305233	-0.305233	-0.305233	2.52768	-0.305233	-0.304941	-0.305154	-0.305233	-0.305233	3.96443	-0.305233	-0.305233	-0.305233	-0.305233	-0.305202	2.66447	-0.305224
c5aad5ebe154556c8422b669638c0745	-0.533678	-0.533678	0.664409	-0.533424	-0.533678	-0.533659	-0.533678	-0.53337	1.43602	1.18314	0.521049	-0.533678	-0.533678	1.19095	-0.533643	-0.533678	-0.533678	-0.533678	-0.533678	-0.532923	-0.533678	3.7029	-0.533488	0.988289	-0.533678	-0.533496	-0.533678	1.46296	-0.533678	-0.533678	1.65674	-0.53362	-0.533658
a69c0a328e1b282389062478c5d49c3a	-1.13243	0.200399	0.128472	0.0671243	0.966576	-0.363037	2.96446	1.16783	-1.132	0.531127	0.141445	0.257966	0.0279948	1.21433	0.630413	-1.13243	-1.13243	1.58262	0.0910617	-0.617444	-1.13243	-1.13075	0.512731	0.912224	-0.35304	-1.132	0.656537	-0.564832	-1.13243	1.15251	-0.307779	-0.810394	-1.13238
969d4c97ed0f7d183e7530340867e86f	-0.174275	-0.174275	-0.173439	-0.173199	-0.174275	-0.174197	-0.174275	-0.172971	-0.173522	-0.17247	5.57048	-0.174275	-0.174275	-0.17395	-0.174128	-0.174275	-0.174275	-0.174275	-0.174275	-0.174275	-0.174275	-0.174275	-0.174275	-0.174275	-0.174275	-0.174275	-0.174275	-0.174275	-0.174275	-0.174275	-0.174275	-0.174275	-0.174275
dd3f1d27af1be908d3c3fd143339aa9c	-0.20772	-0.20772	-0.207523	-0.207467	-0.20772	-0.207701	-0.20772	-0.207413	-0.207543	-0.207293	-0.20772	-0.20772	-0.20772	5.44875	-0.207685	-0.20772	-0.20772	-0.20772	-0.20772	-0.207019	-0.20772	-0.207056	-0.207539	-0.20772	-0.20772	-0.207547	-0.20772	-0.20772	-0.20772	-0.20772	-0.207648	0.987337	-0.2077
bf7348b2028d96bee8686238f2bc5aa2	0.447835	2.44912	-0.718505	0.211123	0.676229	-0.719092	-0.719153	-0.718141	-0.71857	-0.71775	-0.719153	-0.719153	0.0907025	-0.718901	-0.719039	-0.719153	1.7127	-0.719153	1.72243	-0.716651	-0.719153	-0.716812	1.15972	1.18275	2.32985	-0.718546	0.445595	-0.719153	0.148771	-0.719153	1.0889	-0.71896	-0.0115385
fe9a3e2c5c45bec637506a2ae1eb243c	-0.54442	0.48753	-0.544287	-0.544249	-0.54442	-0.544408	-0.54442	-0.544212	-0.5443	-0.544132	-0.54442	-0.54442	-0.54442	-0.544368	-0.544397	1.30791	0.53194	-0.54442	-0.54442	-0.543873	-0.54442	3.15174	1.67085	0.829007	-0.54442	-0.544288	-0.54442	1.05478	1.94582	2.0847	-0.544365	-0.544378	-0.544405
97c1df5666160d3b6dd2bc9ac1c90af0	-0.400622	-0.400622	-0.400541	-0.400518	-0.400622	-0.400615	-0.400622	1.18205	-0.155971	-0.400446	-0.400622	-0.400622	0.750512	-0.400591	1.73454	-0.400622	-0.400622	-0.400622	-0.400622	-0.400309	0.288839	-0.400331	-0.400544	-0.400622	-0.400622	-0.00780525	-0.400622	-0.400622	-0.400622	-0.400622	4.444	1.7783	-0.400614
c803726dac1aad6846d209e915cea275	-0.445815	-0.445815	-0.445477	2.27976	-0.445815	-0.445784	-0.445815	-0.445287	-0.445511	-0.445083	-0.445815	-0.445815	-0.445815	-0.445684	-0.445756	-0.445815	-0.445815	-0.445815	-0.445815	-0.444481	-0.445815	-0.444571	-0.445479	2.55921	-0.445815	-0.445493	2.35797	1.84914	-0.445815	0.639321	-0.445681	-0.445713	2.34602
7f86fe47ae4b09efb9edc6826f727868	0.210738	0.196549	-0.908541	-0.885602	-0.864431	0.90813	1.19941	-0.57938	-0.471293	-0.578208	0.0131754	-0.405049	-1.30374	-0.541944	-0.336069	0.225236	1.72037	3.1677	1.32883	-1.24319	1.06492	1.15848	-0.391836	0.316273	0.473682	-1.5834	-0.394572	0.0794773	0.44025	0.278881	-0.809146	-0.992603	-0.493099
d3d0b6aba6f97f1ba77a412531587a84	-0.815604	-0.815604	1.68124	1.20235	0.349709	-0.815578	-0.815604	-0.815168	-0.815354	2.08935	0.556786	1.21148	-0.0908121	-0.815496	-0.815555	0.42635	0.53875	-0.815604	0.509973	-0.81454	2.0979	-0.814613	-0.815336	0.853162	0.91234	-0.815347	1.33998	-0.815604	0.998641	-0.815604	-0.815497	-0.815522	-0.815575
20ffb1eb28a74810e0c5fd95825aacb5	0.210738	0.196549	-0.908541	-0.885602	-0.864431	0.90813	1.19941	-0.57938	-0.471293	-0.578208	0.0131754	-0.405049	-1.30374	-0.541944	-0.336069	0.225236	1.72037	3.1677	1.32883	-1.24319	1.06492	1.15848	-0.391836	0.316273	0.473682	-1.5834	-0.394572	0.0794773	0.44025	0.278881	-0.809146	-0.992603	-0.493099
36d9f553b6f26520e7a6f8671cdde1f5	-0.414499	-0.414499	-0.414335	2.18638	-0.414499	-0.414483	-0.414499	-0.414242	3.09915	3.11521	-0.414499	-0.414499	0.295881	-0.414435	1.44468	-0.414499	-0.414499	-0.414499	-0.414499	-0.413934	1.04815	-0.41396	-0.414352	-0.414499	-0.414499	-0.414358	-0.414499	-0.414499	-0.414499	-0.414499	-0.41444	-0.414454	-0.414483
4e1bda045e6ba843353281138c649093	-0.445257	1.49303	-0.445002	-0.444929	-0.445257	0.899933	-0.445257	0.791542	0.254292	-0.444704	1.13986	-0.0714205	-0.445257	-0.445158	-0.445212	-0.445257	-0.445257	-0.445257	-0.445257	-0.444283	-0.445257	-0.444348	3.09097	-0.445257	-0.445257	-0.445021	-0.445257	3.52961	-0.445257	-0.445257	-0.445159	-0.445182	-0.44523
6f1cbae792de3e1162d3d7dffbe4bb20	-0.704868	-0.704868	-0.704522	-0.704423	0.469249	-0.704836	-0.704868	-0.704328	-0.704557	-0.704118	-0.704868	0.145716	0.451435	0.443479	0.688554	1.2763	-0.704868	2.28563	-0.704868	-0.703528	-0.704868	-0.703619	-0.704531	-0.704868	0.898149	-0.704544	1.04602	-0.704868	2.72238	1.4655	0.764727	-0.704765	1.43444
c67805e12dc927c5b3ba6b192381ecf7	-0.280432	-0.280432	-0.280281	-0.280237	-0.280432	-0.280418	-0.280432	2.57645	4.64619	1.18988	-0.280432	-0.280432	-0.280432	-0.280374	-0.280406	-0.280432	-0.280432	-0.280432	-0.280432	-0.280432	-0.280432	-0.280432	-0.280432	-0.280432	-0.280432	-0.280432	-0.280432	-0.280432	-0.280432	-0.280432	-0.280432	-0.280432	-0.280432
2a89717b521dc276ae1bd08090909dc4	1.11275	-0.448255	-0.447739	-0.44759	-0.448255	-0.448206	2.82781	-0.447449	1.32714	-0.447138	-0.448255	-0.448255	-0.448255	-0.448054	-0.448164	-0.448255	-0.448255	-0.448255	-0.448255	-0.446284	-0.448255	-0.446403	2.39201	-0.448255	-0.448255	-0.447774	-0.448255	2.09562	2.33939	-0.448255	-0.448055	-0.448102	-0.448201
9e31424bebb25a100572229efc973274	-0.174254	-0.174254	-0.174254	-0.174254	-0.174254	-0.174254	-0.174254	-0.174254	-0.174254	-0.174254	-0.174254	-0.174254	-0.174254	-0.174254	-0.174254	-0.174254	-0.174254	-0.174254	-0.174254	-0.171897	-0.174254	-0.172025	5.57048	-0.174254	-0.174254	-0.173675	-0.174254	-0.174254	-0.174254	-0.174254	-0.174013	-0.17407	-0.174189
6c921e3ae0af506f54295d074ca071bc	-0.36946	-0.36946	-0.369336	-0.3693	-0.36946	-0.369448	2.49543	-0.369267	-0.369349	-0.369191	3.04609	0.0185982	3.47486	-0.369412	0.853109	-0.36946	-0.36946	-0.36946	-0.36946	-0.369076	-0.36946	-0.369086	-0.369357	-0.36946	-0.36946	-0.369362	-0.36946	-0.36946	-0.36946	0.0853681	-0.369419	-0.369428	-0.369449
4eb53a520f214f1caa432f16967223c8	-0.334178	-0.334178	-0.333984	-0.333929	0.379473	-0.33416	-0.334178	-0.333876	-0.334004	-0.333761	-0.334178	-0.334178	-0.334178	-0.334103	-0.334144	-0.334178	-0.334178	-0.334178	-0.334178	-0.333361	-0.334178	-0.333418	0.863988	-0.334178	-0.334178	1.02801	0.727307	-0.334178	-0.334178	-0.334178	-0.334097	5.05801	0.962909
1e238cf69a93a1a2daa7c27cf7f252f1	-0.35136	-0.35136	-0.351248	-0.351215	3.78736	-0.35135	-0.35136	2.4953	-0.351259	-0.351116	-0.35136	-0.35136	-0.35136	-0.351317	-0.351341	-0.35136	-0.35136	-0.35136	-0.35136	-0.350932	-0.35136	-0.350961	1.61674	-0.35136	-0.35136	-0.351257	-0.35136	2.28836	-0.35136	-0.35136	-0.351317	-0.351328	-0.351349
12470c486f558c083c46b45408cae9c6	-0.712573	-0.712573	1.05782	2.88211	1.12359	-0.712525	-0.712573	1.93743	-0.712112	-0.711459	0.664065	-0.712573	0.63101	-0.712374	-0.712483	0.514822	-0.712573	-0.712573	-0.712573	-0.710628	-0.712573	1.68595	1.22635	-0.712573	-0.712573	0.99008	-0.712573	-0.712573	-0.712573	-0.712573	0.178509	0.562237	0.793621
943604f71971b419a2367b530186303f	-0.174807	-0.174807	-0.17165	-0.170785	-0.174807	5.57048	-0.174807	-0.169948	-0.171941	-0.1682	-0.174807	-0.174807	-0.174807	-0.173549	-0.174233	-0.174807	-0.174807	-0.174807	-0.174807	-0.174807	-0.174807	-0.174807	-0.174807	-0.174807	-0.174807	-0.174807	-0.174807	-0.174807	-0.174807	-0.174807	-0.174807	-0.174807	-0.174807
c6f5c4d8343f60687af5d72396766263	5.57048	-0.174198	-0.173688	-0.173541	-0.174198	-0.174151	-0.174198	-0.173402	-0.173739	-0.173094	-0.174198	-0.174198	-0.174198	-0.174	-0.174109	-0.174198	-0.174198	-0.174198	-0.174198	-0.174198	-0.174198	-0.174198	-0.174198	-0.174198	-0.174198	-0.174198	-0.174198	-0.174198	-0.174198	-0.174198	-0.174198	-0.174198	-0.174198
99ee92e36a3bfda54437f2370facd8c8	1.88361	2.91786	-0.593291	-0.593201	-0.593603	-0.593574	-0.593603	-0.593115	-0.593323	-0.592925	0.567684	-0.0602626	-0.593603	1.8929	-0.593548	-0.593603	-0.593603	-0.593603	-0.593603	-0.592413	-0.593603	1.95865	1.56939	0.212794	-0.593603	-0.593315	-0.593603	0.340413	0.532174	-0.593603	-0.593483	1.24018	-0.593571
e127450ed2ad1088a651c6a3f8a405b3	-0.394079	-0.394079	-0.393731	-0.39363	2.64296	-0.394046	-0.394079	-0.393535	-0.393766	-0.393324	-0.394079	-0.394079	1.26402	-0.393944	-0.394018	3.50251	-0.394079	1.44956	-0.394079	-0.392755	-0.394079	-0.392839	-0.393744	-0.394079	-0.394079	-0.393757	2.16903	-0.394079	-0.394079	-0.394079	-0.393945	-0.393977	-0.394043
ce72009c0c36b5ff547b9a0c89f669ce	-0.247785	-0.247785	-0.247785	-0.247785	-0.247785	-0.247785	-0.247785	-0.247785	-0.247785	-0.247785	-0.247785	-0.247785	-0.247785	-0.247785	-0.247785	-0.247785	5.33882	-0.247785	1.16789	-0.246819	-0.247785	-0.246881	-0.247541	-0.247785	0.0883172	-0.247551	0.588207	-0.247785	-0.247785	-0.247785	-0.247688	-0.247711	-0.247759
6a8118b17d1d40cf877db24449ceb616	1.19343	-0.57179	-0.571575	-0.571514	-0.57179	1.77524	-0.57179	-0.571455	-0.571597	0.704395	-0.57179	-0.57179	-0.57179	0.90107	-0.571752	3.02503	-0.57179	-0.57179	-0.57179	1.0425	-0.57179	2.6851	0.509834	0.536994	-0.57179	-0.57159	-0.57179	0.776147	-0.57179	-0.57179	-0.571707	-0.571726	-0.571768
2b33752353804e5616919765189fded9	-0.44165	-0.44165	-0.441351	3.71058	1.92862	-0.441622	-0.44165	1.56729	1.09045	-0.441001	-0.44165	-0.44165	0.541082	2.32397	0.319915	-0.44165	-0.44165	-0.44165	-0.44165	-0.44165	-0.44165	-0.44165	-0.44165	-0.44165	-0.44165	-0.44165	-0.44165	-0.44165	-0.44165	-0.44165	-0.44165	-0.44165	-0.44165
5d7e1a2b35c473c81f0df40903f56f7b	-0.360093	-0.360093	-0.359591	-0.359449	-0.360093	-0.360045	-0.360093	-0.359314	-0.359639	-0.359023	-0.360093	-0.360093	-0.360093	-0.359895	0.845175	-0.360093	-0.360093	-0.360093	-0.360093	-0.357832	4.35194	-0.357973	2.30137	-0.360093	-0.360093	1.05469	-0.360093	-0.360093	-0.360093	1.52088	-0.359864	-0.359918	-0.360031
e5d55481f7455ae8a4620451dc7ac39a	0.210738	0.196549	-0.908541	-0.885602	-0.864431	0.90813	1.19941	-0.57938	-0.471293	-0.578208	0.0131754	-0.405049	-1.30374	-0.541944	-0.336069	0.225236	1.72037	3.1677	1.32883	-1.24319	1.06492	1.15848	-0.391836	0.316273	0.473682	-1.5834	-0.394572	0.0794773	0.44025	0.278881	-0.809146	-0.992603	-0.493099
4feb426703234389503a7b994773d50c	-0.403845	-0.403845	-0.403845	-0.403845	-0.403845	-0.403845	-0.403845	-0.403845	-0.403845	-0.403845	-0.403845	-0.403845	-0.403845	-0.403845	-0.403845	-0.403845	-0.403845	-0.403845	0.975785	0.0878678	4.1519	-0.403514	-0.403756	-0.403845	0.196017	-0.0469699	2.66936	-0.403845	-0.403845	-0.403845	-0.403809	0.565263	1.49644
22907d450b79c927e4ffe34a2d09d2aa	-0.273825	-0.273825	-0.273483	-0.273385	-0.273825	-0.273793	-0.273825	-0.273292	-0.273517	-0.273089	-0.273825	-0.273825	-0.273825	1.06684	-0.273765	-0.273825	-0.273825	-0.273825	-0.273825	-0.272407	-0.273825	-0.272497	4.81823	2.32386	-0.273825	-0.273481	-0.273825	-0.273825	-0.273825	-0.273825	-0.273682	-0.273716	-0.273787
fab19e407fc7d0aa7929a7eae23d8b53	-0.174261	-0.174261	-0.174261	-0.174261	-0.174261	-0.174261	-0.174261	-0.174261	-0.174261	-0.174261	-0.174261	-0.174261	-0.174261	-0.174261	-0.174261	5.57048	-0.174261	-0.174261	-0.174261	-0.17206	-0.174261	-0.172174	-0.173694	-0.174261	-0.174261	-0.173718	-0.174261	-0.174261	-0.174261	-0.174261	-0.174034	-0.174087	-0.1742
ddb4dac009841c724d01963915728bcf	-0.307952	-0.307952	-0.307952	-0.307952	-0.307952	-0.307952	-0.307952	-0.307952	-0.307952	-0.307952	-0.307952	-0.307952	-0.307952	-0.307952	-0.307952	-0.307952	-0.307952	-0.307952	-0.307952	-0.307521	-0.307952	-0.307551	-0.307844	-0.307952	-0.307952	0.342037	4.56695	-0.307952	-0.307952	-0.307952	1.69933	2.32134	-0.30794
cbc6ec0ad878294861f06ed9fff333c0	-0.441545	-0.441545	0.964341	-0.441233	-0.441545	-0.441523	-0.441545	1.11339	3.51149	-0.44102	-0.441545	0.381269	-0.441545	-0.441451	1.20898	-0.441545	1.25662	-0.441545	-0.441545	-0.440639	-0.441545	-0.440696	3.04098	-0.441545	-0.441545	-0.441325	-0.441545	-0.441545	-0.441545	-0.441545	-0.441454	-0.441475	-0.44152
28d081981b2949443a52e354cbbb83e5	-0.243332	-0.243332	-0.243332	-0.243332	-0.243332	-0.243332	-0.243332	-0.243332	-0.243332	-0.243332	-0.243332	-0.243332	-0.243332	-0.243332	-0.243332	-0.243332	-0.243332	-0.243332	-0.243332	-0.2424	4.70133	-0.242462	-0.243097	-0.243332	-0.243332	-0.243106	-0.243332	-0.243332	-0.243332	-0.243332	-0.243238	2.83957	-0.243306
beb1407c19f7fa27ce3bbc0aa7f36157	-0.318093	-0.318093	-0.317602	-0.31746	1.39434	-0.318047	-0.318093	-0.317326	-0.317651	-0.31703	-0.318093	-0.318093	1.27917	-0.317902	-0.318006	-0.318093	-0.318093	-0.318093	-0.318093	-0.316222	-0.318093	-0.316332	-0.317616	-0.318093	-0.318093	-0.317636	-0.318093	4.70103	-0.318093	1.84148	-0.317902	-0.317947	-0.318041
fd54faa463e99098527833fc9d14c4da	-0.466769	-0.466769	-0.466606	-0.466558	-0.466769	-0.466754	0.14815	-0.466513	0.493238	-0.466414	-0.466769	-0.466769	0.288344	-0.466706	-0.466741	-0.466769	-0.466769	-0.466769	-0.466769	-0.466123	0.440634	-0.466169	-0.466608	-0.466769	-0.466769	2.29374	1.16233	0.677171	-0.466769	-0.466769	-0.466705	1.63649	4.0598
337fe99fc52f0e102994ed721dddf577	-0.45379	-0.45379	-0.453619	-0.453569	-0.45379	-0.453774	-0.45379	-0.453522	2.54363	-0.453418	-0.45379	-0.45379	1.26776	1.31967	0.662773	-0.45379	-0.45379	-0.45379	0.73641	-0.453134	-0.45379	-0.453179	-0.453625	-0.45379	-0.45379	1.63682	-0.45379	-0.45379	-0.45379	-0.45379	-0.453724	-0.453739	3.62888
959b9a53f413963f0de2b48bc4ceaece	-0.247267	-0.247267	-0.246633	-0.24645	4.45964	-0.247208	-0.247267	-0.246277	-0.246697	-0.245894	-0.247267	-0.247267	-0.247267	-0.247021	-0.247155	-0.247267	-0.247267	-0.247267	-0.247267	3.19695	-0.247267	-0.245053	-0.246665	-0.247267	-0.247267	-0.246691	-0.247267	-0.247267	-0.247267	-0.247267	-0.247026	-0.247083	-0.247202
3cec387e3e89982bf989b857f7c296d1	-0.174256	-0.174256	-0.174256	-0.174256	-0.174256	-0.174256	-0.174256	-0.174256	-0.174256	-0.174256	-0.174256	-0.174256	-0.174256	-0.174256	-0.174256	-0.174256	-0.174256	-0.174256	-0.174256	-0.172107	-0.174256	-0.172222	-0.173704	-0.174256	-0.174256	-0.173727	-0.174256	5.57048	-0.174256	-0.174256	-0.174035	-0.174087	-0.174197
ee6709e42adcaabd68929412c67480fd	-0.498271	-0.498271	-0.498114	-0.498069	-0.498271	-0.498256	-0.498271	1.15587	0.587948	2.16325	-0.498271	-0.498271	1.72478	2.44297	-0.498244	-0.498271	-0.498271	-0.498271	-0.498271	-0.497671	-0.498271	-0.497713	-0.49812	-0.498271	-0.498271	2.22939	-0.498271	-0.498271	-0.498271	-0.190995	-0.498211	2.34179	-0.498255
f09f257605135a6049b847768387fb33	-0.409231	-0.409231	-0.409124	-0.409093	-0.409231	-0.409221	-0.409231	-0.409064	-0.409134	-0.409001	-0.409231	-0.409231	-0.157504	-0.409189	-0.409212	-0.409231	0.361154	0.333488	-0.409231	-0.408765	-0.409231	1.9713	4.19632	2.38025	-0.409231	-0.409119	-0.409231	0.738472	-0.409231	-0.0700646	0.0666821	-0.409195	-0.409218
d6eda88bd8370a52076b0dafde12249a	0.867067	-0.676095	-0.675719	-0.67561	0.193083	-0.67606	1.94621	-0.675507	2.29188	-0.675278	-0.676095	0.698332	-0.676095	1.17938	2.43292	1.34619	-0.676095	-0.676095	-0.676095	-0.674672	-0.676095	-0.674765	0.742653	1.26462	-0.676095	0.789202	-0.676095	-0.676095	-0.676095	-0.676095	0.441249	-0.675986	-0.676057
efa934e07029e49f4b1959b33c677589	-0.549704	-0.549704	2.80414	2.67202	-0.549704	-0.549682	-0.549704	-0.549342	0.988517	-0.549201	-0.549704	-0.549704	-0.549704	0.902062	0.763323	-0.549704	-0.549704	-0.549704	-0.549704	-0.54883	2.04992	-0.548887	0.752933	1.2996	-0.549704	-0.549492	-0.549704	-0.549704	0.957408	-0.549704	-0.549616	-0.549636	-0.54968
ee0b07653ef54e892656c218fc5b2667	-0.534281	-0.534281	1.87221	-0.534083	-0.534281	-0.534267	-0.534281	-0.53404	0.775394	-0.533946	-0.534281	-0.534281	-0.534281	0.268283	-0.534254	-0.534281	-0.534281	-0.534281	2.35806	2.55174	-0.534281	-0.533725	-0.534131	-0.534281	-0.534281	2.10977	1.93912	-0.534281	-0.534281	-0.534281	-0.534221	0.126001	0.820596
fb9c71bd4976deb7963b33457413c55a	-0.393578	-0.393578	-0.393313	0.346265	-0.393578	-0.393553	-0.393578	-0.393165	-0.39334	-0.393004	-0.393578	-0.393578	3.61139	1.4158	0.434603	-0.393578	-0.393578	-0.393578	1.74556	-0.392582	-0.393578	-0.392646	-0.393326	-0.393578	-0.393578	-0.393336	-0.393578	-0.393578	-0.393578	-0.393578	3.06894	-0.393501	-0.393551
81f59f6a76c8682de1719c97b5b24173	-0.362412	-0.362412	-0.362106	-0.362017	3.29262	-0.362383	-0.362412	1.01466	-0.362137	1.13045	-0.362412	-0.362412	3.78534	-0.362293	-0.362358	0.92063	-0.362412	-0.362412	-0.362412	-0.361432	-0.362412	-0.361463	-0.362152	-0.362412	-0.362412	-0.362164	-0.362412	-0.362412	-0.362412	-0.362412	-0.362307	-0.362332	-0.362384
b5ad34d760628319baf398eac0c09823	0.210738	0.196549	-0.908541	-0.885602	-0.864431	0.90813	1.19941	-0.57938	-0.471293	-0.578208	0.0131754	-0.405049	-1.30374	-0.541944	-0.336069	0.225236	1.72037	3.1677	1.32883	-1.24319	1.06492	1.15848	-0.391836	0.316273	0.473682	-1.5834	-0.394572	0.0794773	0.44025	0.278881	-0.809146	-0.992603	-0.493099
950524da5744abc0ef286d09c7f75bc3	-0.213113	5.40222	-0.212146	-0.21187	-0.213113	-0.213022	-0.213113	-0.211606	-0.212242	-0.21103	-0.213113	-0.213113	-0.213113	-0.212736	-0.212942	-0.213113	-0.213113	-0.213113	-0.213113	-0.210022	-0.213113	-0.210069	-0.212272	-0.213113	-0.213113	1.18932	-0.213113	-0.213113	-0.213113	-0.213113	-0.212775	-0.212854	-0.213022
08faf2041b38f0c8f2faa68e7d5edd31	1.27304	4.11083	-0.331015	-0.330958	-0.33121	-0.331192	1.27171	-0.330905	-0.331035	-0.330786	-0.33121	-0.33121	-0.33121	-0.331134	-0.331176	-0.33121	-0.33121	-0.33121	-0.33121	-0.330496	-0.33121	2.9468	-0.331028	-0.33121	-0.33121	-0.331035	-0.33121	-0.33121	-0.33121	-0.33121	-0.331137	-0.331154	-0.33119
7edcf5ecdce390629d592a7f513444a8	-0.265937	-0.265937	-0.265642	1.88524	5.01717	-0.26591	-0.265937	-0.265475	-0.265672	-0.265295	-0.265937	-0.265937	1.07385	-0.265823	-0.265886	-0.265937	-0.265937	-0.265937	-0.265937	-0.265937	-0.265937	-0.265937	-0.265937	-0.265937	-0.265937	-0.265937	-0.265937	-0.265937	-0.265937	-0.265937	-0.265937	-0.265937	-0.265937
f1b5d72cafaaea7b61c531cb90452d9c	-0.492735	3.37866	-0.491798	1.43056	0.540901	-0.492647	-0.492735	-0.491273	-0.491892	-0.49071	-0.492735	-0.492735	-0.492735	-0.492371	-0.49257	0.976504	1.91624	0.436547	-0.492735	-0.489262	-0.492735	-0.489437	-0.491839	-0.492735	-0.492735	-0.491877	-0.492735	2.44776	-0.492735	1.17607	-0.492377	-0.492461	-0.492639
1f6b653f720ec1043596d00d1ae328bb	-0.46913	-0.46913	0.068319	-0.210498	-0.197923	-0.469113	0.0602868	-0.468845	-0.468966	-0.468734	-0.46913	0.11512	-0.46913	-0.46906	0.845134	0.0263654	-0.46913	-0.46913	-0.46913	-0.46842	-0.46913	4.90068	1.73364	0.164795	-0.106394	-0.468959	0.455724	-0.46913	0.254763	0.207978	-0.469059	-0.219509	-0.12515
ce0fd2cf90c42ae9233134dfbd75a46b	0.210738	0.196549	-0.908541	-0.885602	-0.864431	0.90813	1.19941	-0.57938	-0.471293	-0.578208	0.0131754	-0.405049	-1.30374	-0.541944	-0.336069	0.225236	1.72037	3.1677	1.32883	-1.24319	1.06492	1.15848	-0.391836	0.316273	0.473682	-1.5834	-0.394572	0.0794773	0.44025	0.278881	-0.809146	-0.992603	-0.493099
5eaeab6fa2a8efe96eac7a0712c65080	-0.371982	0.16417	-0.371787	-0.371732	-0.371982	-0.371964	-0.371982	-0.37168	-0.371806	-0.371567	-0.371982	-0.371982	-0.371982	-0.371906	-0.371947	2.52354	-0.371982	-0.371982	-0.371982	-0.371075	0.915661	4.30786	0.742965	-0.371982	-0.371982	-0.371763	-0.371982	-0.371982	-0.371982	-0.371982	-0.371891	1.38662	-0.371958
7b5b130650d5363701e3d6d7aefa0cc3	0.210738	0.196549	-0.908541	-0.885602	-0.864431	0.90813	1.19941	-0.57938	-0.471293	-0.578208	0.0131754	-0.405049	-1.30374	-0.541944	-0.336069	0.225236	1.72037	3.1677	1.32883	-1.24319	1.06492	1.15848	-0.391836	0.316273	0.473682	-1.5834	-0.394572	0.0794773	0.44025	0.278881	-0.809146	-0.992603	-0.493099
045acd620c390c80b3447bae8b6a039b	-0.274408	-0.274408	-0.27386	-0.273705	-0.274408	-0.274357	-0.274408	-0.273556	-0.273915	-0.273232	2.0293	-0.274408	-0.274408	-0.274194	-0.274311	-0.274408	-0.274408	-0.274408	-0.274408	-0.272181	-0.274408	-0.272309	4.89236	1.30112	-0.274408	-0.273863	-0.274408	-0.274408	-0.274408	-0.274408	-0.274181	-0.274235	-0.274347
a252c86ee882a495a76c18e7f3c63d18	0.210738	0.196549	-0.908541	-0.885602	-0.864431	0.90813	1.19941	-0.57938	-0.471293	-0.578208	0.0131754	-0.405049	-1.30374	-0.541944	-0.336069	0.225236	1.72037	3.1677	1.32883	-1.24319	1.06492	1.15848	-0.391836	0.316273	0.473682	-1.5834	-0.394572	0.0794773	0.44025	0.278881	-0.809146	-0.992603	-0.493099
6337b308d49ea78bc68f9100ca6c62b4	-0.248097	-0.248097	-0.245406	-0.244655	-0.248097	-0.24784	-0.248097	-0.243933	-0.245663	-0.242394	-0.248097	-0.248097	-0.248097	4.45978	-0.247614	-0.248097	-0.248097	3.19675	-0.248097	-0.242901	-0.248097	-0.242475	-0.246472	-0.248097	-0.248097	-0.246591	-0.248097	-0.248097	-0.248097	-0.248097	-0.247431	-0.247586	-0.247915
91a093473cad95da81d9ebb47d5ef0c5	-0.418806	-0.418806	-0.418633	-0.418584	1.25059	-0.41879	0.714119	-0.418537	0.262628	-0.418432	-0.418806	-0.418806	0.42372	-0.418739	-0.418775	-0.418806	-0.418806	-0.418806	-0.418806	-0.418139	-0.418806	-0.418185	-0.418638	-0.418806	-0.418806	-0.418645	3.78108	-0.418806	-0.418806	-0.418806	-0.0340112	3.20034	0.868909
a9b24370bdb02a8ee91855de7b8b2813	-0.175211	-0.175211	-0.175211	-0.175211	-0.175211	-0.175211	-0.175211	-0.175211	-0.175211	-0.175211	-0.175211	-0.175211	-0.175211	-0.175211	-0.175211	-0.175211	-0.175211	-0.175211	-0.175211	-0.162398	-0.175211	-0.162022	-0.171493	-0.175211	-0.175211	-0.17172	5.57046	-0.175211	-0.175211	-0.175211	-0.173702	-0.174054	-0.174801
721bbde09abf2f51fc7d8caeab5b22f1	0.210738	0.196549	-0.908541	-0.885602	-0.864431	0.90813	1.19941	-0.57938	-0.471293	-0.578208	0.0131754	-0.405049	-1.30374	-0.541944	-0.336069	0.225236	1.72037	3.1677	1.32883	-1.24319	1.06492	1.15848	-0.391836	0.316273	0.473682	-1.5834	-0.394572	0.0794773	0.44025	0.278881	-0.809146	-0.992603	-0.493099
c446deb131fcc44553f50d10c5f7e52b	-0.444923	2.33934	-0.444373	-0.444215	2.22164	3.12384	-0.444923	-0.444064	-0.444429	-0.44373	1.7167	1.03322	1.57407	-0.44471	-0.444827	-0.444923	-0.444923	-0.444923	-0.444923	-0.444923	-0.444923	-0.444923	-0.444923	-0.444923	-0.444923	-0.444923	-0.444923	-0.444923	-0.444923	-0.444923	-0.444923	-0.444923	-0.444923
a6b8bcc8499b4128678a3a671a0bd004	0.210738	0.196549	-0.908541	-0.885602	-0.864431	0.90813	1.19941	-0.57938	-0.471293	-0.578208	0.0131754	-0.405049	-1.30374	-0.541944	-0.336069	0.225236	1.72037	3.1677	1.32883	-1.24319	1.06492	1.15848	-0.391836	0.316273	0.473682	-1.5834	-0.394572	0.0794773	0.44025	0.278881	-0.809146	-0.992603	-0.493099
851bd80d021dcf4e9f3f11e95310927c	-0.439827	-0.439827	-0.439486	-0.439388	-0.439827	-0.439795	-0.439827	-0.439295	2.87221	1.46637	-0.439827	-0.439827	2.11665	-0.439695	0.824252	-0.439827	-0.439827	-0.439827	-0.439827	-0.438548	-0.439827	-0.438629	2.87915	-0.439827	-0.439827	-0.439516	-0.439827	-0.439827	-0.439827	-0.439827	-0.439698	1.71227	-0.439792
ee92daa238d9b91f85aef29b32ee15c0	-0.2459	-0.2459	-0.2459	-0.2459	-0.2459	-0.2459	-0.2459	-0.2459	-0.2459	-0.2459	-0.2459	-0.2459	-0.2459	-0.2459	-0.2459	-0.2459	-0.2459	-0.2459	-0.2459	-0.233571	-0.2459	-0.233744	-0.242542	4.60817	-0.2459	2.98413	-0.2459	-0.2459	-0.2459	-0.2459	-0.244548	-0.244865	-0.245534
924ab5cb47309a83e71d60320378d194	-0.411029	-0.411029	-0.410628	-0.410512	-0.411029	-0.410992	-0.411029	2.98651	-0.410669	-0.410159	-0.411029	-0.411029	1.71405	-0.410873	-0.410959	-0.411029	-0.411029	-0.411029	-0.411029	0.751367	-0.411029	-0.409594	3.54423	-0.411029	-0.411029	-0.410657	-0.411029	1.40892	-0.411029	-0.411029	-0.410874	0.688297	-0.410987
a80466eb93811bc792e1524c6afc316a	-0.45008	2.492	-0.449816	-0.44974	-0.45008	1.61326	-0.45008	-0.449667	-0.449842	-0.449507	-0.45008	-0.45008	-0.45008	-0.449977	-0.450033	2.27832	-0.45008	-0.45008	-0.45008	-0.449054	-0.45008	-0.449123	2.672	-0.45008	-0.45008	-0.449832	-0.45008	0.993432	2.09872	-0.45008	-0.449977	-0.450001	-0.450052
c926b3733b95b828aabf62bf8b70300a	-0.54518	1.38152	0.472155	-0.544918	-0.54518	-0.545161	0.449309	-0.544862	3.3187	1.71343	-0.54518	-0.54518	-0.54518	2.61145	-0.545145	-0.54518	0.505214	-0.54518	-0.54518	-0.544422	-0.54518	-0.54447	-0.544988	-0.54518	-0.54518	-0.544996	-0.54518	0.541186	1.17472	0.368836	-0.545104	-0.545122	-0.54516
226ab97195d19858d059fffaef17f5d7	-0.174121	-0.174121	-0.173938	-0.173886	5.57048	-0.174104	-0.174121	-0.173836	-0.173957	-0.173725	-0.174121	-0.174121	-0.174121	-0.17405	-0.174089	-0.174121	-0.174121	-0.174121	-0.174121	-0.174121	-0.174121	-0.174121	-0.174121	-0.174121	-0.174121	-0.174121	-0.174121	-0.174121	-0.174121	-0.174121	-0.174121	-0.174121	-0.174121
6499f775759ee97ec90a0572cd043472	-0.258551	-0.258551	-0.258551	-0.258551	-0.258551	-0.258551	-0.258551	-0.258551	-0.258551	-0.258551	-0.258551	-0.258551	-0.258551	-0.258551	-0.258551	5.1084	-0.258551	-0.258551	-0.258551	-0.2572	-0.258551	-0.257286	-0.258209	0.872972	-0.258551	-0.258223	-0.258551	-0.258551	-0.258551	1.7716	-0.258415	-0.258447	-0.258514
e438498696e4ce6da6b786e98f911a9e	-0.445453	-0.445453	-0.445082	-0.444975	-0.445453	-0.445418	-0.445453	-0.444874	-0.445119	-0.444652	-0.445453	1.68323	-0.445453	-0.445308	-0.445387	0.854736	2.8241	-0.445453	1.88503	-0.443951	-0.445453	-0.44405	-0.445074	-0.445453	2.67169	-0.445089	-0.445453	-0.445453	-0.445453	-0.445453	2.10183	-0.445337	-0.445412
cd2f42f12af82e310f2c16f0ebcee8b5	0.210738	0.196549	-0.908541	-0.885602	-0.864431	0.90813	1.19941	-0.57938	-0.471293	-0.578208	0.0131754	-0.405049	-1.30374	-0.541944	-0.336069	0.225236	1.72037	3.1677	1.32883	-1.24319	1.06492	1.15848	-0.391836	0.316273	0.473682	-1.5834	-0.394572	0.0794773	0.44025	0.278881	-0.809146	-0.992603	-0.493099
9cf3ece63fb5e5d8a14a81d6ec6f2b7b	-0.489165	-0.489165	3.45871	2.95721	1.00968	-0.489105	-0.489165	-0.48816	-0.488587	1.32486	-0.489165	-0.489165	0.301756	-0.488916	-0.489052	-0.489165	-0.489165	-0.489165	0.944792	-0.486935	-0.489165	-0.487035	-0.488585	-0.489165	0.574984	-0.488611	-0.489165	-0.489165	1.21059	-0.489165	-0.488933	-0.050411	-0.489103
df6d28dcdb6d93ca063daeb86dfc8e2d	-0.436049	-0.436049	-0.435749	-0.435663	-0.436049	-0.436021	-0.436049	-0.435581	3.09423	-0.4354	-0.436049	-0.436049	-0.436049	-0.435933	-0.435996	-0.436049	-0.436049	-0.436049	-0.436049	1.31969	-0.436049	-0.43495	-0.435753	-0.436049	0.972069	2.43281	2.64064	-0.436049	-0.436049	-0.436049	1.31037	-0.435958	-0.436017
55f2658f7b605509d87faed6518dd8f7	-0.294779	-0.294779	-0.294581	-0.294524	-0.294779	-0.294761	-0.294779	-0.29447	-0.294602	-0.294349	-0.294779	-0.294779	4.5514	-0.294703	1.44761	-0.294779	-0.294779	-0.294779	-0.294779	-0.294039	-0.294779	-0.294086	-0.294592	-0.294779	-0.0363746	-0.294599	-0.294779	-0.294779	-0.294779	-0.294779	2.58262	-0.294722	-0.294759
682dde043b6d08cf20021dc1e423446d	-0.351827	-0.351827	-0.351613	0.684165	0.106454	-0.351807	-0.351827	-0.351493	0.50834	-0.351363	-0.351827	0.0199749	-0.351827	-0.351744	-0.351789	-0.351827	-0.351827	-0.351827	-0.351827	-0.350989	-0.351827	1.93618	-0.351617	-0.351827	-0.351827	-0.351625	-0.351827	1.08066	-0.351827	-0.351827	-0.351743	4.80922	-0.351805
c6cc193827dee5c035291d0d1d14b625	-0.174439	-0.174439	-0.174439	-0.174439	-0.174439	-0.174439	-0.174439	-0.174439	-0.174439	-0.174439	-0.174439	-0.174439	-0.174439	-0.174439	-0.174439	-0.174439	-0.174439	-0.174439	5.57048	-0.170203	-0.174439	-0.170286	-0.173294	-0.174439	-0.174439	-0.173351	-0.174439	-0.174439	-0.174439	-0.174439	-0.173979	-0.174087	-0.174314
85781f76fdd51f1cea0eab36c8b76a12	0.210738	0.196549	-0.908541	-0.885602	-0.864431	0.90813	1.19941	-0.57938	-0.471293	-0.578208	0.0131754	-0.405049	-1.30374	-0.541944	-0.336069	0.225236	1.72037	3.1677	1.32883	-1.24319	1.06492	1.15848	-0.391836	0.316273	0.473682	-1.5834	-0.394572	0.0794773	0.44025	0.278881	-0.809146	-0.992603	-0.493099
bf5f9d8270688749d52cb3dfea76b096	-0.174217	-0.174217	-0.173627	-0.173457	-0.174217	-0.174162	-0.174217	-0.173296	-0.173686	-0.17294	5.57048	-0.174217	-0.174217	-0.173988	-0.174113	-0.174217	-0.174217	-0.174217	-0.174217	-0.174217	-0.174217	-0.174217	-0.174217	-0.174217	-0.174217	-0.174217	-0.174217	-0.174217	-0.174217	-0.174217	-0.174217	-0.174217	-0.174217
6d4ab2107d92228c6751838e7dbbe697	-0.239744	-0.239744	-0.239744	-0.239744	-0.239744	-0.239744	-0.239744	-0.239744	-0.239744	-0.239744	-0.239744	-0.239744	-0.239744	-0.239744	-0.239744	4.86175	-0.239744	-0.239744	-0.239744	-0.238018	-0.239744	-0.238126	-0.239306	-0.239744	-0.239744	-0.239324	-0.239744	-0.239744	-0.239744	-0.239744	-0.239569	2.56588	-0.239697
7409b7841b167aedd9fc7a7ff3923371	-0.466367	-0.466367	-0.466178	2.92576	-0.466367	-0.46635	-0.466367	-0.466071	-0.466197	-0.465956	-0.466367	-0.466367	-0.466367	0.83251	0.344313	-0.466367	-0.466367	-0.466367	1.2076	-0.465637	-0.466367	-0.465687	-0.466184	-0.466367	2.20793	0.273193	-0.466367	-0.466367	-0.466367	-0.466367	-0.466294	0.644943	3.22018
6cb43841db5cf96e8b37e2de4b9076bd	-0.174096	-0.174096	-0.174096	-0.174096	-0.174096	-0.174096	-0.174096	-0.174096	-0.174096	-0.174096	-0.174096	-0.174096	-0.174096	-0.174096	-0.174096	-0.174096	-0.174096	-0.174096	-0.174096	-0.173851	-0.174096	-0.173868	5.57048	-0.174096	-0.174096	-0.174037	-0.174096	-0.174096	-0.174096	-0.174096	-0.174071	-0.174077	-0.174089
bbaad0f397a1590db5c42bf1f40c8db9	2.56865	-0.301466	-0.301152	-0.301062	-0.301466	4.1658	-0.301466	-0.300976	-0.301184	-0.300785	2.30719	-0.301466	-0.301466	-0.301345	-0.301411	-0.301466	-0.301466	-0.301466	-0.301466	-0.301466	-0.301466	-0.301466	-0.301466	-0.301466	-0.301466	-0.301466	-0.301466	-0.301466	-0.301466	-0.301466	-0.301466	-0.301466	-0.301466
daf471369c8df7afa7849741660d855b	-0.285772	-0.285772	-0.285616	-0.285572	-0.285772	3.08305	-0.285772	-0.285529	-0.285632	-0.285434	-0.285772	-0.285772	1.16637	4.32262	-0.285744	-0.285772	-0.285772	-0.285772	-0.285772	-0.285772	-0.285772	-0.285772	-0.285772	-0.285772	-0.285772	-0.285772	-0.285772	-0.285772	-0.285772	-0.285772	-0.285772	-0.285772	-0.285772
b0393e75df8338f8224463cb1b34efbd	-0.335427	0.197967	3.44177	-0.335023	-0.335427	-0.335398	-0.335427	-0.334937	-0.335145	-0.334746	-0.335427	0.360528	-0.335427	-0.335306	-0.335372	-0.335427	-0.335427	-0.335427	-0.335427	-0.334247	-0.335427	-0.334319	-0.335128	0.209797	0.810115	-0.33514	-0.335427	-0.335427	4.03118	-0.335427	-0.335308	-0.335336	-0.335395
e2ca214f7055c2a6eedc54ac7689d169	0.210738	0.196549	-0.908541	-0.885602	-0.864431	0.90813	1.19941	-0.57938	-0.471293	-0.578208	0.0131754	-0.405049	-1.30374	-0.541944	-0.336069	0.225236	1.72037	3.1677	1.32883	-1.24319	1.06492	1.15848	-0.391836	0.316273	0.473682	-1.5834	-0.394572	0.0794773	0.44025	0.278881	-0.809146	-0.992603	-0.493099
81a2990f9cfa961fada745053a685388	-0.39655	-0.39655	-0.396085	1.44706	-0.39655	4.17216	-0.39655	-0.395824	2.03176	-0.395542	-0.39655	-0.39655	-0.39655	-0.396369	-0.396468	-0.39655	-0.39655	-0.39655	-0.39655	-0.394859	-0.39655	-0.39495	1.81715	-0.39655	-0.39655	-0.396134	0.430065	-0.39655	-0.39655	0.802119	-0.396376	-0.396417	-0.396503
46f09d7aa9bcac4a3e3e8574925eb57a	0.908302	-0.429765	-0.42906	-0.428858	-0.429765	-0.429699	-0.429765	-0.428666	-0.42913	-0.428245	0.828916	-0.429765	0.497779	-0.42949	-0.429641	1.3849	-0.429765	-0.429765	-0.429765	-0.426913	-0.429765	-0.427094	-0.429043	-0.429765	-0.429765	2.08564	-0.429765	-0.429765	-0.429765	-0.429765	1.26338	4.19333	-0.429688
27b0bca5c048a9dfade9558dcf685681	-0.299297	-0.299297	-0.299297	-0.299297	-0.299297	-0.299297	-0.299297	-0.299297	-0.299297	-0.299297	-0.299297	-0.299297	-0.299297	-0.299297	-0.299297	-0.299297	-0.299297	-0.299297	1.74772	-0.298286	-0.299297	-0.298353	-0.299042	-0.299297	3.87308	-0.299052	3.35544	-0.299297	-0.299297	-0.299297	-0.299195	-0.299219	-0.299269
466f240b16ae7967d70c0d1c09d52b3d	-0.245848	-0.245848	-0.245536	-0.245446	-0.245848	-0.245819	-0.245848	-0.245361	-0.245568	-0.245172	0.660144	-0.245848	-0.245848	5.25773	-0.245793	-0.245848	-0.245848	-0.245848	-0.245848	-0.2448	-0.245848	-0.244841	-0.245573	-0.245848	-0.245848	-0.245585	-0.245848	-0.245848	-0.245848	1.45251	-0.245738	-0.245763	-0.245818
325ce268c8bbe026198a5ca3dbaad5b9	-0.384433	2.95577	-0.383812	2.42068	1.59131	-0.384375	-0.384433	-0.383463	3.22877	-0.383086	-0.384433	-0.384433	-0.384433	-0.384193	-0.384324	-0.384433	-0.384433	-0.384433	0.560351	-0.38306	-0.384433	-0.383013	-0.384032	-0.384433	-0.384433	-0.384057	-0.384433	-0.384433	-0.384433	-0.384433	-0.38427	-0.384308	-0.384389
a1a4c2a01149dfc5c428026c5c6df27c	-0.374561	-0.374561	-0.374325	0.942422	1.70134	-0.374539	-0.374561	1.9747	4.19343	-0.374047	-0.374561	-0.374561	1.67491	-0.37447	-0.37452	-0.374561	-0.374561	-0.374561	-0.374561	-0.374561	-0.374561	-0.374561	-0.374561	-0.374561	-0.374561	-0.374561	-0.374561	-0.374561	-0.374561	-0.374561	-0.374561	-0.374561	-0.374561
0cd7b1cc6232d6896e37e6cff5489de7	-0.17415	-0.17415	-0.173843	-0.173755	-0.17415	-0.174122	-0.17415	-0.173671	-0.173875	-0.173484	-0.17415	-0.17415	5.57048	-0.174031	-0.174097	-0.17415	-0.17415	-0.17415	-0.17415	-0.17415	-0.17415	-0.17415	-0.17415	-0.17415	-0.17415	-0.17415	-0.17415	-0.17415	-0.17415	-0.17415	-0.17415	-0.17415	-0.17415
d06a285ea63bd5cc53a4b0e46d0cdd72	-0.174278	-0.174278	-0.174278	-0.174278	-0.174278	-0.174278	-0.174278	-0.174278	-0.174278	-0.174278	-0.174278	-0.174278	-0.174278	-0.174278	-0.174278	-0.174278	-0.174278	-0.174278	-0.174278	-0.171602	-0.174278	-0.171765	-0.173598	-0.174278	-0.174278	5.57048	-0.174278	-0.174278	-0.174278	-0.174278	-0.174007	-0.174071	-0.174205
2c545231aacaf1d8c6b3f8f8930d4363	1.47481	2.36824	-0.575416	-0.575169	-0.576273	-0.576193	-0.576273	-0.574935	1.81368	0.95427	-0.576273	-0.576273	1.55866	-0.575941	-0.576123	-0.576273	-0.576273	-0.576273	-0.576273	1.907	-0.576273	-0.573255	-0.575455	-0.576273	-0.576273	-0.57549	0.739516	-0.576273	-0.576273	-0.576273	-0.575947	2.18345	0.822131
cb1abf418422e26cfb437c2a36fa1ee9	-0.325917	-0.325917	-0.325727	-0.325672	-0.325917	-0.325899	-0.325917	-0.325619	-0.325746	4.53593	-0.325917	-0.325917	-0.325917	-0.325843	-0.325884	-0.325917	-0.325917	-0.325917	2.06697	-0.325189	1.53402	-0.325237	-0.325734	-0.325917	-0.325917	1.3119	-0.325917	-0.325917	-0.325917	-0.325917	-0.325844	-0.325861	-0.325897
294439019add4f19e8d5d95d40921207	-0.274066	-0.274066	0.219918	-0.273865	-0.274066	-0.274052	-0.274066	-0.273822	5.05166	0.757184	-0.274066	-0.274066	1.91861	-0.274006	-0.274039	-0.274066	-0.274066	-0.274066	-0.274066	-0.274066	-0.274066	-0.274066	-0.274066	-0.274066	-0.274066	-0.274066	-0.274066	-0.274066	-0.274066	-0.274066	-0.274066	-0.274066	-0.274066
aae626812acc320e71e44fd7ab0561b0	-0.291304	-0.291304	-0.291304	-0.291304	-0.291304	-0.291304	-0.291304	-0.291304	-0.291304	-0.291304	-0.291304	-0.291304	-0.291304	-0.291304	-0.291304	-0.291304	-0.291304	-0.291304	-0.291304	-0.289	3.79962	-0.289142	-0.290719	-0.291304	-0.291304	1.2737	-0.291304	-0.291304	-0.291304	-0.291304	-0.29107	-0.291125	3.66033
13016b09f7d9ec021bdf6b8eb3ebe1c2	-0.250539	-0.250539	-0.249597	-0.249328	-0.250539	-0.25045	-0.250539	-0.249072	3.79156	-0.248512	-0.250539	-0.250539	-0.250539	-0.250171	-0.250372	-0.250539	3.9605	-0.250539	-0.250539	-0.247475	-0.250539	-0.247526	-0.249707	-0.250539	-0.250539	-0.24975	-0.250539	-0.250539	-0.250539	-0.250539	-0.250204	-0.250283	-0.250448
10055b4de0b725f946f9dc5f3e8409df	-0.359455	-0.359455	-0.359227	0.868011	-0.359455	1.97636	-0.359455	-0.359099	-0.35925	-0.35896	-0.359455	-0.359455	-0.359455	0.527126	-0.359415	-0.359455	-0.359455	-0.359455	-0.359455	-0.358578	-0.359455	4.07481	2.61585	-0.359455	-0.359455	-0.359243	-0.359455	-0.359455	-0.359455	-0.359455	-0.359367	-0.359388	-0.359432
2a49df686e0bcc18304f6345ff23ec12	-0.288322	-0.288322	-0.288169	-0.288125	-0.288322	-0.288308	-0.288322	-0.288083	-0.288185	-0.287989	-0.288322	-0.288322	1.17818	-0.288263	4.07196	-0.288322	-0.288322	-0.288322	-0.288322	-0.287742	-0.288322	-0.28778	-0.288176	-0.288322	-0.288322	-0.288182	3.39687	-0.288322	-0.288322	-0.288322	-0.288264	-0.288278	-0.288307
179beb90602a37152b5bd7e022db905b	0.210738	0.196549	-0.908541	-0.885602	-0.864431	0.90813	1.19941	-0.57938	-0.471293	-0.578208	0.0131754	-0.405049	-1.30374	-0.541944	-0.336069	0.225236	1.72037	3.1677	1.32883	-1.24319	1.06492	1.15848	-0.391836	0.316273	0.473682	-1.5834	-0.394572	0.0794773	0.44025	0.278881	-0.809146	-0.992603	-0.493099
fca9a6cab4d479ef5a1201da4efb3d21	-0.174287	-0.174287	-0.173381	-0.173122	-0.174287	-0.174202	-0.174287	-0.172875	-0.173472	-0.172332	-0.174287	-0.174287	-0.174287	-0.173934	5.57048	-0.174287	-0.174287	-0.174287	-0.174287	-0.174287	-0.174287	-0.174287	-0.174287	-0.174287	-0.174287	-0.174287	-0.174287	-0.174287	-0.174287	-0.174287	-0.174287	-0.174287	-0.174287
6a80c4d47b44c692aeab74181c5fe012	-0.40077	-0.40077	-0.400568	1.05795	-0.40077	-0.400751	-0.40077	3.15013	-0.400589	2.53872	-0.40077	-0.40077	2.18392	2.2904	-0.400734	-0.40077	-0.40077	-0.40077	-0.40077	-0.40077	-0.40077	-0.40077	-0.40077	-0.40077	-0.40077	-0.40077	-0.40077	-0.40077	-0.40077	-0.40077	-0.40077	-0.40077	-0.40077
1e040db0048bb4067f6d355cb45648dd	-0.253888	-0.253888	-0.253448	-0.253322	1.30569	-0.253847	-0.253888	-0.253202	-0.253492	-0.252937	1.08993	-0.253888	-0.253888	-0.253717	-0.253811	-0.253888	-0.253888	-0.253888	-0.253888	-0.252186	-0.253888	-0.252286	-0.253454	-0.253888	-0.253888	-0.253472	5.2132	-0.253888	-0.253888	-0.253888	-0.253715	-0.253756	-0.253842
2cf0267a31dc6f1b8ee65c913b8f6e4d	-0.174305	-0.174305	-0.173342	-0.173066	5.57048	-0.174215	-0.174305	-0.172803	-0.173439	-0.172225	-0.174305	-0.174305	-0.174305	-0.173931	-0.174136	-0.174305	-0.174305	-0.174305	-0.174305	-0.174305	-0.174305	-0.174305	-0.174305	-0.174305	-0.174305	-0.174305	-0.174305	-0.174305	-0.174305	-0.174305	-0.174305	-0.174305	-0.174305
d925f54f2129619db22eb998d6021440	-0.382569	-0.382569	-0.382135	1.20802	1.54653	-0.382529	-0.382569	-0.38189	-0.382179	-0.381626	-0.382569	-0.382569	3.80811	-0.382401	-0.382493	-0.382569	-0.382569	-0.382569	-0.382569	-0.380976	-0.382569	-0.381067	2.76887	1.37386	-0.382569	-0.382179	-0.382569	-0.382569	-0.382569	-0.382569	-0.382407	-0.382445	-0.382526
eb1d7f519ae360e6e68a2f1520785e5e	-0.396399	3.1736	-0.394729	-0.394252	-0.396399	-0.396242	-0.396399	-0.393798	-0.394895	-0.392803	1.85375	-0.396399	1.50185	-0.395748	-0.396104	-0.396399	-0.396399	-0.396399	-0.396399	-0.39121	3.14848	-0.39126	-0.394976	-0.396399	1.3946	-0.39505	-0.396399	-0.396399	-0.396399	-0.396399	-0.395826	-0.39596	-0.396244
5331f57ab0f2e416cce5e856ca82bc07	-0.232076	-0.232076	-0.232076	-0.232076	-0.232076	-0.232076	-0.232076	-0.232076	-0.232076	-0.232076	-0.232076	-0.232076	-0.232076	-0.232076	-0.232076	-0.232076	-0.232076	-0.232076	-0.232076	-0.229049	5.09503	-0.229203	-0.231295	-0.232076	-0.232076	-0.231329	-0.232076	-0.232076	-0.232076	-0.232076	2.09157	-0.231837	-0.231992
85ad3838de9cd515fe87a67ecc1e8637	-0.174572	-0.174572	-0.174572	-0.174572	-0.174572	-0.174572	-0.174572	-0.174572	-0.174572	-0.174572	-0.174572	-0.174572	-0.174572	-0.174572	-0.174572	-0.174572	-0.174572	-0.174572	-0.174572	-0.168776	-0.174572	-0.168891	-0.173006	-0.174572	-0.174572	-0.173084	-0.174572	5.57048	-0.174572	-0.174572	-0.173942	-0.17409	-0.174402
885af48524af5ccac2ffcff5abf6c1f9	-0.300263	-0.300263	1.77698	-0.299913	-0.300263	-0.300238	-0.300263	-0.299839	-0.300019	3.57019	-0.300263	-0.300263	3.65951	-0.300158	-0.300215	-0.300263	-0.300263	-0.300263	-0.300263	-0.300263	-0.300263	-0.300263	-0.300263	-0.300263	-0.300263	-0.300263	-0.300263	-0.300263	-0.300263	-0.300263	-0.300263	-0.300263	-0.300263
43174239df6a1b8ca91b4b53216c3ded	0.210738	0.196549	-0.908541	-0.885602	-0.864431	0.90813	1.19941	-0.57938	-0.471293	-0.578208	0.0131754	-0.405049	-1.30374	-0.541944	-0.336069	0.225236	1.72037	3.1677	1.32883	-1.24319	1.06492	1.15848	-0.391836	0.316273	0.473682	-1.5834	-0.394572	0.0794773	0.44025	0.278881	-0.809146	-0.992603	-0.493099
c8e34bb10306cd8cc72e42eb1313b7c8	-0.174356	-0.174356	-0.173017	-0.172636	-0.174356	-0.17423	-0.174356	-0.172272	5.57048	-0.171476	-0.174356	-0.174356	-0.174356	-0.173834	-0.174119	-0.174356	-0.174356	-0.174356	-0.174356	-0.174356	-0.174356	-0.174356	-0.174356	-0.174356	-0.174356	-0.174356	-0.174356	-0.174356	-0.174356	-0.174356	-0.174356	-0.174356	-0.174356
fccded6877cd0c095e155d6ec5f09020	-0.23427	-0.23427	-0.234141	-0.234104	-0.23427	-0.234258	-0.23427	-0.234069	-0.234154	-0.233991	-0.23427	-0.23427	-0.23427	0.964494	-0.234247	-0.23427	-0.23427	-0.23427	-0.23427	-0.233758	-0.23427	-0.233793	-0.234141	-0.23427	0.679715	-0.234146	-0.23427	-0.23427	-0.23427	-0.23427	5.38166	-0.234231	-0.234256
cf401a47745da4870973ee837389d89b	-0.245313	-0.245313	-0.244426	4.59379	-0.245313	-0.24523	-0.245313	-0.243929	-0.244516	-0.243393	-0.245313	-0.245313	-0.245313	3.00567	-0.245157	-0.245313	-0.245313	-0.245313	-0.245313	-0.245313	-0.245313	-0.245313	-0.245313	-0.245313	-0.245313	-0.245313	-0.245313	-0.245313	-0.245313	-0.245313	-0.245313	-0.245313	-0.245313
e5ee1d85ad16f8c94333754ffe9430ff	-0.43067	-0.43067	-0.429953	-0.429748	-0.43067	-0.430602	-0.43067	-0.429554	0.517355	-0.429127	-0.43067	-0.43067	-0.43067	1.70783	-0.430543	-0.43067	-0.43067	-0.43067	-0.43067	3.46643	-0.43067	-0.427914	-0.429925	-0.43067	-0.43067	1.85441	-0.43067	-0.43067	-0.43067	-0.43067	-0.430373	2.2132	1.86058
341495ff6dc78a6fde5fcb6e81ba82df	0.210738	0.196549	-0.908541	-0.885602	-0.864431	0.90813	1.19941	-0.57938	-0.471293	-0.578208	0.0131754	-0.405049	-1.30374	-0.541944	-0.336069	0.225236	1.72037	3.1677	1.32883	-1.24319	1.06492	1.15848	-0.391836	0.316273	0.473682	-1.5834	-0.394572	0.0794773	0.44025	0.278881	-0.809146	-0.992603	-0.493099
d80a7337f5b24c90a8cc2dd4d9896e61	-0.174162	-0.174162	5.57048	-0.173631	-0.174162	-0.174124	-0.174162	-0.173518	-0.173792	-0.173268	-0.174162	-0.174162	-0.174162	-0.174003	-0.17409	-0.174162	-0.174162	-0.174162	-0.174162	-0.174162	-0.174162	-0.174162	-0.174162	-0.174162	-0.174162	-0.174162	-0.174162	-0.174162	-0.174162	-0.174162	-0.174162	-0.174162	-0.174162
9a28e6b1aaae69477039957bc8a1222f	-0.300795	-0.300795	-0.299985	-0.299753	1.83517	-0.300719	-0.300795	-0.299532	3.28708	-0.299045	-0.300795	-0.300795	-0.300795	-0.30048	-0.300652	-0.300795	-0.300795	-0.300795	-0.300795	-0.297839	-0.300795	-0.297981	-0.300029	-0.300795	-0.300795	-0.300063	-0.300795	-0.300795	-0.300795	-0.300795	-0.300489	3.88855	-0.300712
ae56f854ea8f4a95b7950e1c3a9c4051	0.572287	0.857607	-0.306567	5.11294	-0.306798	-0.306776	-0.306798	-0.306436	-0.30659	-0.306296	-0.306798	-0.306798	-0.306798	0.831618	-0.306757	-0.306798	-0.306798	-0.306798	-0.306798	-0.306002	-0.306798	-0.306038	-0.306591	-0.306798	-0.306798	-0.3066	-0.306798	1.21239	-0.306798	-0.306798	-0.306715	-0.306734	-0.306775
003a296ba4c55f34d62c224bda66f5a9	-0.355362	-0.355362	-0.355014	-0.354914	3.47347	-0.355329	-0.355362	-0.354819	-0.355049	-0.354607	-0.355362	-0.355362	-0.355362	-0.355227	2.53934	-0.355362	-0.355362	-0.355362	1.57794	-0.354045	-0.355362	-0.354129	-0.355029	-0.355362	-0.355362	2.70901	-0.355362	-0.355362	-0.355362	-0.355362	-0.355229	-0.35526	-0.355326
901c9973bde010c1a5c49023e63cc252	-0.250523	-0.250523	3.80889	-0.249429	-0.250523	-0.250443	-0.250523	-0.249197	-0.249757	-0.248687	-0.250523	-0.250523	-0.250523	-0.250192	-0.250373	-0.250523	-0.250523	-0.250523	-0.250523	-0.247576	-0.250523	-0.247675	-0.249743	3.9438	-0.250523	-0.24978	-0.250523	-0.250523	-0.250523	-0.250523	-0.25021	-0.250284	-0.250439
8d29ff878dedd515753578864b4df80c	0.210738	0.196549	-0.908541	-0.885602	-0.864431	0.90813	1.19941	-0.57938	-0.471293	-0.578208	0.0131754	-0.405049	-1.30374	-0.541944	-0.336069	0.225236	1.72037	3.1677	1.32883	-1.24319	1.06492	1.15848	-0.391836	0.316273	0.473682	-1.5834	-0.394572	0.0794773	0.44025	0.278881	-0.809146	-0.992603	-0.493099
de689038d335b0e895f90f08f59c3ab1	-0.380352	-0.380352	-0.380103	2.39366	2.22408	-0.380329	-0.380352	-0.379963	-0.380128	3.85858	-0.380352	-0.380352	0.958636	-0.380256	-0.380308	-0.380352	-0.380352	-0.380352	-0.380352	-0.379471	-0.380352	-0.379516	-0.380125	-0.380352	-0.380352	-0.380135	-0.380352	-0.380352	-0.380352	-0.380352	1.21161	-0.380283	-0.380328
84977ba94188c5d008f9861e3e14d0a5	-0.31574	-0.31574	-0.31574	-0.31574	-0.31574	-0.31574	-0.31574	-0.31574	-0.31574	-0.31574	-0.31574	-0.31574	-0.31574	-0.31574	-0.31574	0.700266	1.3475	-0.31574	-0.31574	-0.314452	-0.31574	4.43442	-0.315415	-0.31574	-0.31574	-0.315428	2.6721	-0.31574	-0.31574	-0.31574	-0.315611	-0.315641	-0.315706
805c0959b90cd47bb52d9f6571c5fb6a	-0.174516	-0.174516	-0.174516	-0.174516	-0.174516	-0.174516	-0.174516	-0.174516	-0.174516	-0.174516	-0.174516	-0.174516	-0.174516	-0.174516	-0.174516	-0.174516	-0.174516	-0.174516	-0.174516	-0.169356	-0.174516	-0.169476	-0.173129	-0.174516	-0.174516	-0.173198	-0.174516	-0.174516	-0.174516	5.57048	-0.173959	-0.17409	-0.174366
c7e785c8e289c83881a0d6d6c5038baa	-0.174121	-0.174121	-0.174121	-0.174121	-0.174121	-0.174121	-0.174121	-0.174121	-0.174121	-0.174121	-0.174121	-0.174121	-0.174121	-0.174121	-0.174121	-0.174121	-0.174121	-0.174121	-0.174121	-0.173573	-0.174121	-0.173611	-0.173984	-0.174121	-0.174121	-0.173989	-0.174121	-0.174121	-0.174121	-0.174121	-0.174066	5.57048	-0.174107
2333d54fd55eecf1e50005e26735d7e8	0.210738	0.196549	-0.908541	-0.885602	-0.864431	0.90813	1.19941	-0.57938	-0.471293	-0.578208	0.0131754	-0.405049	-1.30374	-0.541944	-0.336069	0.225236	1.72037	3.1677	1.32883	-1.24319	1.06492	1.15848	-0.391836	0.316273	0.473682	-1.5834	-0.394572	0.0794773	0.44025	0.278881	-0.809146	-0.992603	-0.493099
3cc2913d7687f4cdbb8354510c83ea9c	0.210738	0.196549	-0.908541	-0.885602	-0.864431	0.90813	1.19941	-0.57938	-0.471293	-0.578208	0.0131754	-0.405049	-1.30374	-0.541944	-0.336069	0.225236	1.72037	3.1677	1.32883	-1.24319	1.06492	1.15848	-0.391836	0.316273	0.473682	-1.5834	-0.394572	0.0794773	0.44025	0.278881	-0.809146	-0.992603	-0.493099
c5e5fd5c9af649aec207b86dee76d5f3	-0.174366	-0.174366	-0.173077	-0.172709	-0.174366	-0.174245	-0.174366	-0.172358	-0.173205	-0.17159	-0.174366	-0.174366	-0.174366	5.57048	-0.174139	-0.174366	-0.174366	-0.174366	-0.174366	-0.174366	-0.174366	-0.174366	-0.174366	-0.174366	-0.174366	-0.174366	-0.174366	-0.174366	-0.174366	-0.174366	-0.174366	-0.174366	-0.174366
4380abc163ecefa354d7002925971253	-0.421569	-0.421569	3.6073	-0.421008	2.59392	-0.421528	-0.421569	-0.420889	1.82243	-0.420624	-0.421569	-0.421569	1.24541	1.48513	-0.421493	-0.421569	-0.421569	-0.421569	-0.421569	-0.420323	-0.421569	-0.420335	-0.421227	-0.421569	-0.421569	-0.421245	-0.421569	0.622439	-0.421569	-0.421569	-0.421431	-0.421463	-0.421532
94ba5abb35d4c1be4aca9f587116e478	-0.245168	-0.245168	-0.244987	-0.244934	4.5984	-0.245151	-0.245168	-0.244885	-0.245005	-0.244774	-0.245168	-0.245168	-0.245168	-0.245098	-0.245136	-0.245168	-0.245168	-0.245168	-0.245168	-0.244488	-0.245168	-0.244531	2.99882	-0.245168	-0.245168	-0.245003	-0.245168	-0.245168	-0.245168	-0.245168	-0.245099	-0.245115	-0.24515
a5a7486c3e60ff3d6cc20e9e6359e7ea	-0.373515	-0.373515	-0.37323	-0.373148	-0.373515	-0.373489	-0.373515	-0.37307	2.30652	-0.372897	-0.373515	-0.373515	-0.373515	-0.373405	-0.373465	-0.373515	-0.373515	-0.373515	-0.373515	-0.372387	1.69336	-0.372463	-0.373231	-0.373515	-0.373515	-0.373243	-0.373515	-0.373515	-0.373515	-0.373515	0.211153	2.68608	3.55668
e6629192287fec42180fb889cfb7474a	0.595946	1.76972	-0.495696	-0.49552	-0.496307	-0.49625	-0.496307	-0.495352	0.825035	-0.494982	-0.496307	-0.496307	-0.496307	2.39846	1.45253	-0.496307	-0.496307	-0.496307	-0.496307	-0.494042	-0.496307	-0.494171	1.06548	-0.496307	-0.496307	-0.495752	-0.496307	3.59025	-0.496307	-0.496307	-0.496076	0.204493	0.000529465
e24e7b9b383a4e46a7761d21ddd703aa	-0.344113	-0.344113	-0.343847	1.88432	3.3379	-0.344089	-0.344113	-0.343697	-0.343874	-0.343535	-0.344113	-0.344113	-0.344113	3.51074	1.24481	-0.344113	-0.344113	-0.344113	-0.344113	-0.344113	-0.344113	-0.344113	-0.344113	-0.344113	-0.344113	-0.344113	-0.344113	-0.344113	-0.344113	-0.344113	-0.344113	-0.344113	-0.344113
a40989ab021cea8e78077a6ad97eb5ff	-0.175216	-0.175216	-0.170359	-0.169018	5.57047	-0.174748	-0.175216	-0.167723	-0.170814	-0.164995	-0.175216	-0.175216	-0.175216	-0.173289	-0.174338	-0.175216	-0.175216	-0.175216	-0.175216	-0.175216	-0.175216	-0.175216	-0.175216	-0.175216	-0.175216	-0.175216	-0.175216	-0.175216	-0.175216	-0.175216	-0.175216	-0.175216	-0.175216
a83afda041174fc9813bc1ea05dfe9f7	-0.174203	-0.174203	-0.174203	-0.174203	-0.174203	-0.174203	-0.174203	-0.174203	-0.174203	-0.174203	-0.174203	-0.174203	-0.174203	-0.174203	-0.174203	-0.174203	-0.174203	-0.174203	5.57048	-0.172695	-0.174203	-0.172776	-0.173816	-0.174203	-0.174203	-0.173832	-0.174203	-0.174203	-0.174203	-0.174203	-0.174048	-0.174085	-0.174161
e36be349dea51383ef7c2f26dd242def	-0.248511	-0.248511	-0.248511	-0.248511	-0.248511	-0.248511	-0.248511	-0.248511	-0.248511	-0.248511	-0.248511	-0.248511	-0.248511	-0.248511	-0.248511	-0.248511	-0.248511	-0.248511	-0.248511	-0.243819	-0.248511	-0.244056	-0.2473	-0.248511	-0.248511	-0.247352	-0.248511	-0.248511	-0.248511	-0.248511	-0.248027	3.34129	4.35054
3bac14d2805bf995afe9d316a5777b1e	-0.435918	-0.435918	1.07215	-0.435571	-0.435918	-0.435893	-0.435918	2.79309	-0.435676	-0.435334	-0.435918	-0.435918	-0.435918	-0.435814	0.260133	-0.435918	-0.435918	-0.435918	-0.435918	-0.434887	-0.435918	-0.434955	-0.435658	1.27508	-0.435918	-0.435669	-0.435918	0.941071	3.73738	1.25095	-0.435815	-0.435839	-0.43589
60a2e0a4d6760de56ad66a42a4093dc5	0.210738	0.196549	-0.908541	-0.885602	-0.864431	0.90813	1.19941	-0.57938	-0.471293	-0.578208	0.0131754	-0.405049	-1.30374	-0.541944	-0.336069	0.225236	1.72037	3.1677	1.32883	-1.24319	1.06492	1.15848	-0.391836	0.316273	0.473682	-1.5834	-0.394572	0.0794773	0.44025	0.278881	-0.809146	-0.992603	-0.493099
4cc5231ea86506b08cdeebfec868214f	-0.296445	-0.296445	-0.296445	-0.296445	-0.296445	-0.296445	-0.296445	-0.296445	-0.296445	-0.296445	-0.296445	-0.296445	-0.296445	-0.296445	-0.296445	-0.296445	-0.296445	-0.296445	-0.296445	-0.295496	-0.296445	-0.29556	1.96419	-0.296445	-0.296445	-0.296216	-0.296445	2.59287	-0.296445	4.33404	-0.29635	-0.296373	-0.29642
b2097d12843899152a99e4faeb92e3e6	-0.303737	-0.303737	-0.303154	-0.302987	-0.303737	3.86201	-0.303737	-0.302828	-0.303213	-0.302477	2.0823	-0.303737	-0.303737	-0.303511	-0.303635	-0.303737	-0.303737	-0.303737	-0.303737	-0.301779	-0.303737	3.16004	-0.303218	-0.303737	-0.303737	-0.303242	-0.303737	-0.303737	-0.303737	-0.303737	-0.303529	-0.303578	-0.303681
9d24a5958524b572f096d356fd33187c	-0.214717	-0.214717	-0.214603	-0.21457	-0.214717	5.47153	-0.214717	0.808492	-0.214615	-0.21447	-0.214717	-0.214717	0.160816	-0.214673	-0.214697	-0.214717	-0.214717	-0.214717	-0.214717	-0.214717	-0.214717	-0.214717	-0.214717	-0.214717	-0.214717	-0.214717	-0.214717	-0.214717	-0.214717	-0.214717	-0.214717	-0.214717	-0.214717
30598f0d14cb4af2c3150ebb17667b95	0.210738	0.196549	-0.908541	-0.885602	-0.864431	0.90813	1.19941	-0.57938	-0.471293	-0.578208	0.0131754	-0.405049	-1.30374	-0.541944	-0.336069	0.225236	1.72037	3.1677	1.32883	-1.24319	1.06492	1.15848	-0.391836	0.316273	0.473682	-1.5834	-0.394572	0.0794773	0.44025	0.278881	-0.809146	-0.992603	-0.493099
401e9cda8dd173db76e03cfe30f2274e	-0.174435	-0.174435	-0.174435	-0.174435	-0.174435	-0.174435	-0.174435	-0.174435	-0.174435	-0.174435	-0.174435	-0.174435	-0.174435	-0.174435	-0.174435	-0.174435	-0.174435	-0.174435	-0.174435	-0.17018	-0.174435	-0.170349	-0.173319	-0.174435	-0.174435	-0.17337	5.57048	-0.174435	-0.174435	-0.174435	-0.173988	-0.174093	-0.174314
23176b0d224a85cab9385a426000544f	-0.430298	-0.430298	-0.429832	-0.4297	-0.430298	-0.430254	-0.430298	-0.429573	-0.429878	-0.429298	1.43506	-0.430298	-0.430298	-0.430116	-0.430216	3.63352	-0.430298	-0.430298	-0.430298	-0.428323	3.03033	-0.428451	-0.429799	1.21806	-0.430298	0.589911	-0.430298	-0.430298	-0.430298	-0.430298	-0.430099	0.866978	0.405847
b664aba9c5e0e5cc58a311f8ff3d8b0c	-0.174905	-0.174905	-0.174905	-0.174905	-0.174905	-0.174905	-0.174905	-0.174905	-0.174905	-0.174905	-0.174905	-0.174905	-0.174905	-0.174905	-0.174905	-0.174905	-0.174905	-0.174905	-0.174905	-0.165448	-0.174905	-0.165305	-0.172217	-0.174905	-0.174905	-0.172372	-0.174905	5.57047	-0.174905	-0.174905	-0.173818	-0.174072	-0.17461
2f38713af6dbed30ebf9709d2d9aaa5e	0.210738	0.196549	-0.908541	-0.885602	-0.864431	0.90813	1.19941	-0.57938	-0.471293	-0.578208	0.0131754	-0.405049	-1.30374	-0.541944	-0.336069	0.225236	1.72037	3.1677	1.32883	-1.24319	1.06492	1.15848	-0.391836	0.316273	0.473682	-1.5834	-0.394572	0.0794773	0.44025	0.278881	-0.809146	-0.992603	-0.493099
e046e29a358f4e382dccc33ca22f61ad	-0.174272	-0.174272	-0.173451	-0.173216	5.57048	-0.174195	-0.174272	-0.172992	-0.173534	-0.172498	-0.174272	-0.174272	-0.174272	-0.173953	-0.174127	-0.174272	-0.174272	-0.174272	-0.174272	-0.174272	-0.174272	-0.174272	-0.174272	-0.174272	-0.174272	-0.174272	-0.174272	-0.174272	-0.174272	-0.174272	-0.174272	-0.174272	-0.174272
39f1b510d3d0f5a6d28609e5a26641a9	0.210738	0.196549	-0.908541	-0.885602	-0.864431	0.90813	1.19941	-0.57938	-0.471293	-0.578208	0.0131754	-0.405049	-1.30374	-0.541944	-0.336069	0.225236	1.72037	3.1677	1.32883	-1.24319	1.06492	1.15848	-0.391836	0.316273	0.473682	-1.5834	-0.394572	0.0794773	0.44025	0.278881	-0.809146	-0.992603	-0.493099
ac6339220d6d65fd32be30bd13317b2a	-0.174332	-0.174332	-0.174332	-0.174332	-0.174332	-0.174332	-0.174332	-0.174332	-0.174332	-0.174332	-0.174332	-0.174332	-0.174332	-0.174332	-0.174332	-0.174332	-0.174332	-0.174332	-0.174332	-0.171177	-0.174332	-0.171346	-0.173521	-0.174332	-0.174332	-0.173556	-0.174332	-0.174332	-0.174332	-0.174332	-0.174008	5.57048	-0.174245
4422afa5e085d3e4373b56dd5c28160d	-0.348008	-0.348008	-0.347517	-0.347377	-0.348008	-0.347962	-0.348008	-0.347244	2.04973	-0.346951	-0.348008	-0.348008	-0.348008	-0.347817	-0.347921	-0.348008	-0.348008	-0.348008	-0.348008	-0.346013	-0.348008	-0.346141	-0.347503	-0.348008	-0.348008	-0.347524	-0.348008	-0.348008	-0.348008	-0.348008	1.61709	3.94563	2.47166
20ac30224f0d6923615fbc03ac84563f	-0.174128	-0.174128	-0.174128	-0.174128	-0.174128	-0.174128	-0.174128	-0.174128	-0.174128	-0.174128	-0.174128	-0.174128	-0.174128	-0.174128	-0.174128	-0.174128	-0.174128	-0.174128	-0.174128	-0.17345	-0.174128	-0.173495	5.57048	-0.174128	-0.174128	-0.173964	-0.174128	-0.174128	-0.174128	-0.174128	-0.17406	-0.174076	-0.17411
731f05b0a2cd5a295eed1bf67823ec44	-0.218531	-0.218531	-0.218531	-0.218531	-0.218531	-0.218531	-0.218531	-0.218531	-0.218531	-0.218531	-0.218531	-0.218531	-0.218531	-0.218531	-0.218531	-0.218531	-0.218531	-0.218531	-0.218531	-0.216953	-0.218531	-0.217055	-0.218133	-0.218531	-0.218531	-0.218149	-0.218531	-0.218531	-0.218531	-0.218531	1.43584	5.33476	-0.218489
d946d324770eadf58b78632e2ba1cfd4	0.210738	0.196549	-0.908541	-0.885602	-0.864431	0.90813	1.19941	-0.57938	-0.471293	-0.578208	0.0131754	-0.405049	-1.30374	-0.541944	-0.336069	0.225236	1.72037	3.1677	1.32883	-1.24319	1.06492	1.15848	-0.391836	0.316273	0.473682	-1.5834	-0.394572	0.0794773	0.44025	0.278881	-0.809146	-0.992603	-0.493099
41968913d9ca2d9dfd73c99f7947bb01	-0.303837	-0.303837	-0.303525	-0.303434	-0.303837	-0.303808	-0.303837	-0.303349	3.19742	-0.303158	-0.303837	-0.303837	3.82686	2.08886	-0.303782	-0.303837	-0.303837	-0.303837	-0.303837	-0.303837	-0.303837	-0.303837	-0.303837	-0.303837	-0.303837	-0.303837	-0.303837	-0.303837	-0.303837	-0.303837	-0.303837	-0.303837	-0.303837
203720d95f187b349581dde6357d9132	-0.174256	-0.174256	-0.174256	-0.174256	-0.174256	-0.174256	-0.174256	-0.174256	-0.174256	-0.174256	-0.174256	-0.174256	-0.174256	-0.174256	-0.174256	-0.174256	-0.174256	-0.174256	-0.174256	-0.172018	-0.174256	-0.172147	-0.173684	-0.174256	-0.174256	-0.173708	-0.174256	-0.174256	-0.174256	-0.174256	5.57048	-0.174081	-0.174194
ac28c199405fa8466bdedf16d456edbc	-0.250188	-0.250188	-0.249156	-0.248862	-0.250188	-0.250091	-0.250188	-0.248582	-0.249258	-0.247972	4.08958	-0.250188	-0.250188	-0.249785	-0.250005	-0.250188	-0.250188	-0.250188	-0.250188	-0.246876	-0.250188	3.65264	-0.249281	-0.250188	-0.250188	-0.249329	-0.250188	-0.250188	-0.250188	-0.250188	-0.249823	-0.249908	-0.250089
531aa5958090e7b9ccce63177bb153cc	1.4018	-0.386426	-0.385783	-0.385599	-0.386426	-0.386366	-0.386426	-0.385424	2.48197	-0.385038	-0.386426	-0.386426	-0.386426	-0.386176	-0.386313	-0.386426	-0.386426	-0.386426	-0.386426	-0.383937	-0.386426	-0.384084	1.31535	-0.386426	-0.386426	-0.385818	-0.386426	3.86154	-0.386426	-0.386426	-0.386173	1.74923	-0.386358
c4170fd31c9aceb042c699e6c8b0f486	0.210738	0.196549	-0.908541	-0.885602	-0.864431	0.90813	1.19941	-0.57938	-0.471293	-0.578208	0.0131754	-0.405049	-1.30374	-0.541944	-0.336069	0.225236	1.72037	3.1677	1.32883	-1.24319	1.06492	1.15848	-0.391836	0.316273	0.473682	-1.5834	-0.394572	0.0794773	0.44025	0.278881	-0.809146	-0.992603	-0.493099
0e85b6110968eab4776c425a6a084aee	0.210738	0.196549	-0.908541	-0.885602	-0.864431	0.90813	1.19941	-0.57938	-0.471293	-0.578208	0.0131754	-0.405049	-1.30374	-0.541944	-0.336069	0.225236	1.72037	3.1677	1.32883	-1.24319	1.06492	1.15848	-0.391836	0.316273	0.473682	-1.5834	-0.394572	0.0794773	0.44025	0.278881	-0.809146	-0.992603	-0.493099
9e3b0ce9bb690b78f97f20c102089c55	1.37181	4.69719	-0.345443	-0.345331	1.04976	-0.345795	-0.345831	-0.345224	-0.345482	-0.344988	-0.345831	-0.345831	-0.345831	1.68816	-0.345763	-0.345831	-0.345831	-0.345831	-0.345831	-0.344604	-0.345831	-0.344637	0.870558	-0.345831	-0.345831	-0.345519	-0.345831	-0.345831	-0.345831	-0.345831	-0.3457	-0.34573	-0.345796
12691e42e5f8f917a8ca55e38670afdd	0.210738	0.196549	-0.908541	-0.885602	-0.864431	0.90813	1.19941	-0.57938	-0.471293	-0.578208	0.0131754	-0.405049	-1.30374	-0.541944	-0.336069	0.225236	1.72037	3.1677	1.32883	-1.24319	1.06492	1.15848	-0.391836	0.316273	0.473682	-1.5834	-0.394572	0.0794773	0.44025	0.278881	-0.809146	-0.992603	-0.493099
9746280e6ff0f4cda443483da574140f	-0.290327	-0.290327	-0.29007	-0.289996	-0.290327	-0.290303	-0.290327	2.12213	-0.290097	-0.28977	-0.290327	-0.290327	2.00766	-0.290228	-0.290282	-0.290327	-0.290327	-0.290327	4.57597	-0.289378	-0.290327	-0.289434	-0.290085	-0.290327	-0.290327	-0.290095	-0.290327	-0.290327	-0.290327	-0.290327	-0.290231	-0.290253	-0.290301
ff30b3d451a318cb5fcf4a87f83927ad	-0.242087	-0.242087	-0.242087	-0.242087	-0.242087	-0.242087	-0.242087	-0.242087	-0.242087	-0.242087	-0.242087	-0.242087	-0.242087	-0.242087	-0.242087	-0.242087	-0.242087	-0.242087	-0.242087	-0.236154	-0.242087	-0.236444	-0.240552	-0.242087	-0.242087	2.71285	-0.242087	-0.242087	-0.242087	-0.242087	4.7781	-0.241617	-0.241922
5e0ba474de1b721e3e60a2ee92fbe1c9	-0.306794	-0.306794	-0.306541	-0.306468	-0.306794	-0.30677	-0.306794	-0.306399	3.67137	3.2128	-0.306794	-0.306794	-0.306794	2.3186	-0.30675	-0.306794	-0.306794	-0.306794	-0.306794	-0.306794	-0.306794	-0.306794	-0.306794	-0.306794	-0.306794	-0.306794	-0.306794	-0.306794	-0.306794	-0.306794	-0.306794	-0.306794	-0.306794
982a74bbad780f1063c5024106a33c77	0.210738	0.196549	-0.908541	-0.885602	-0.864431	0.90813	1.19941	-0.57938	-0.471293	-0.578208	0.0131754	-0.405049	-1.30374	-0.541944	-0.336069	0.225236	1.72037	3.1677	1.32883	-1.24319	1.06492	1.15848	-0.391836	0.316273	0.473682	-1.5834	-0.394572	0.0794773	0.44025	0.278881	-0.809146	-0.992603	-0.493099
4db1f9668fcebff493189edcbc1bf58c	-0.341619	-0.341619	2.72299	-0.34127	-0.341619	-0.341594	-0.341619	-0.341196	-0.341376	-0.341032	-0.341619	-0.341619	-0.341619	-0.341514	-0.341572	-0.341619	-0.341619	-0.341619	3.3189	3.09961	-0.341619	-0.340636	-0.341354	-0.341619	-0.341619	-0.341364	-0.341619	-0.341619	-0.341619	-0.341619	-0.341513	-0.341538	0.761984
18812bd61aeb2cea2081498cfa9ee3c8	-0.174491	-0.174491	-0.174491	-0.174491	-0.174491	-0.174491	-0.174491	-0.174491	-0.174491	-0.174491	-0.174491	-0.174491	-0.174491	-0.174491	-0.174491	-0.174491	-0.174491	-0.174491	-0.174491	-0.16902	-0.174491	-0.169285	-0.173075	-0.174491	-0.174491	5.57048	-0.174491	-0.174491	-0.174491	-0.174491	-0.173925	-0.174058	-0.174339
c9a8c692374f350d7d810c60436e3f69	-0.278385	-0.278385	-0.278385	-0.278385	-0.278385	-0.278385	-0.278385	-0.278385	-0.278385	-0.278385	-0.278385	-0.278385	-0.278385	-0.278385	-0.278385	-0.278385	-0.278385	-0.278385	-0.278385	-0.274181	-0.278385	-0.274423	-0.277311	1.69904	-0.278385	4.85957	-0.278385	1.78284	-0.278385	-0.278385	-0.277956	-0.278057	-0.27827
7b28c20e72c6c95b3e604f0849245770	-0.304879	-0.304879	-0.304879	-0.304879	-0.304879	-0.304879	-0.304879	-0.304879	-0.304879	-0.304879	-0.304879	-0.304879	-0.304879	-0.304879	-0.304879	-0.304879	-0.304879	-0.304879	-0.304879	-0.303664	-0.304879	-0.303747	-0.304573	-0.304879	1.04638	1.54835	-0.304879	-0.304879	-0.304879	-0.304879	0.872299	0.0526443	5.01428
3883c3ab093249287e47ca21ff186ca4	2.55179	-0.331003	-0.329974	-0.32968	-0.331003	4.07951	-0.331003	-0.329399	0.663705	-0.328783	-0.331003	-0.331003	-0.331003	-0.330603	-0.330822	-0.331003	-0.331003	-0.331003	-0.331003	-0.327877	-0.331003	-0.327907	-0.330146	-0.331003	-0.331003	-0.330191	-0.331003	2.28873	-0.331003	-0.331003	-0.330658	-0.330739	-0.33091
2ef1e51ab1cf99a3c6417b05a060830e	-0.315422	-0.315422	-0.314817	-0.314643	1.89233	-0.315365	-0.315422	4.44751	-0.314878	-0.314111	-0.315422	-0.315422	-0.315422	-0.315187	-0.315315	-0.315422	0.438868	-0.315422	-0.315422	-0.313374	-0.315422	-0.313451	-0.314883	2.35937	-0.315422	-0.314908	-0.315422	-0.315422	-0.315422	-0.315422	-0.315206	-0.315256	-0.315363
d68891a5ba2504d90882e288aa250acf	-0.358615	-0.358615	-0.358213	-0.358097	-0.358615	-0.358577	-0.358615	-0.357987	-0.358253	-0.357745	-0.358615	-0.358615	2.18099	-0.358459	-0.358544	-0.358615	-0.358615	-0.358615	-0.358615	3.49824	-0.358615	-0.357132	-0.358215	-0.358615	-0.358615	2.07324	-0.358615	-0.358615	-0.358615	-0.358615	-0.358455	2.64223	-0.358572
04e96f8e3e9a8aaea0cf71feba8b0e16	-0.174819	-0.174819	-0.174819	-0.174819	-0.174819	-0.174819	-0.174819	-0.174819	-0.174819	-0.174819	-0.174819	-0.174819	-0.174819	-0.174819	-0.174819	-0.174819	-0.174819	-0.174819	5.57047	-0.166467	-0.174819	-0.166183	-0.17238	-0.174819	-0.174819	-0.172531	-0.174819	-0.174819	-0.174819	-0.174819	-0.173828	-0.174059	-0.174549
0eee29a6487936c4f7c726a62028f7d6	-0.174261	-0.174261	-0.174261	-0.174261	-0.174261	-0.174261	-0.174261	-0.174261	-0.174261	-0.174261	-0.174261	-0.174261	-0.174261	-0.174261	-0.174261	-0.174261	-0.174261	-0.174261	-0.174261	-0.172026	-0.174261	-0.172151	-0.173689	-0.174261	-0.174261	-0.173713	-0.174261	-0.174261	-0.174261	-0.174261	-0.174032	-0.174086	5.57048
f6b9f4774df15b2fdd3ba4af8805ff44	-0.440148	-0.440148	1.41038	-0.439658	-0.440148	-0.440112	-0.440148	-0.439555	-0.439806	0.915629	-0.440148	-0.440148	-0.440148	0.41245	-0.440081	-0.440148	-0.440148	-0.440148	-0.440148	-0.438677	3.49522	-0.438772	-0.439776	-0.440148	2.11133	-0.439791	-0.440148	-0.440148	-0.440148	-0.440148	0.42644	-0.440034	2.66716
039e067e246486e5d5cac2e0b2bbeca2	-0.174365	-0.174365	-0.172898	5.57048	-0.174365	-0.174227	-0.174365	-0.17208	-0.173044	-0.171206	-0.174365	-0.174365	-0.174365	-0.173793	-0.174106	-0.174365	-0.174365	-0.174365	-0.174365	-0.174365	-0.174365	-0.174365	-0.174365	-0.174365	-0.174365	-0.174365	-0.174365	-0.174365	-0.174365	-0.174365	-0.174365	-0.174365	-0.174365
538add871396bc31fee52b4c6e73542a	-0.247677	-0.247677	-0.247349	-0.247255	-0.247677	4.41369	-0.247677	-0.247165	-0.247382	-0.246967	-0.247677	-0.247677	-0.247677	-0.24755	-0.247619	-0.247677	-0.247677	-0.247677	-0.247677	-0.246442	-0.247677	-0.246512	3.25888	-0.247677	-0.247677	-0.247375	-0.247677	-0.247677	-0.247677	-0.247677	-0.247551	-0.247581	-0.247643
e9ba53901533347c901fadbda061b68f	-0.270995	-0.270995	-0.270995	-0.270995	-0.270995	-0.270995	-0.270995	-0.270995	-0.270995	-0.270995	-0.270995	-0.270995	-0.270995	-0.270995	-0.270995	-0.270995	-0.270995	-0.270995	-0.270995	-0.269755	3.51621	-0.269838	-0.270683	-0.270995	-0.270995	4.15	0.460692	-0.270995	-0.270995	-0.270995	-0.270871	-0.2709	-0.270962
65b43ef12cd01434a8f7c309eccd229b	-0.241928	-0.241928	-0.241928	-0.241928	-0.241928	-0.241928	-0.241928	-0.241928	-0.241928	-0.241928	-0.241928	-0.241928	-0.241928	-0.241928	-0.241928	-0.241928	-0.241928	-0.241928	-0.241928	-0.236703	-0.241928	-0.23696	-0.240577	-0.241928	-0.241928	-0.240636	-0.241928	-0.241928	-0.241928	-0.241928	2.70277	4.78402	-0.241783
28affdeffa89a42891c5ce1ee5d45774	-0.307341	-0.307341	-0.30664	-0.30644	-0.307341	-0.307275	-0.307341	-0.306249	-0.306709	-0.305832	3.21659	-0.307341	-0.307341	-0.307068	-0.307217	-0.307341	-0.307341	-0.307341	-0.307341	-0.304618	-0.307341	-0.304759	2.33399	3.65781	-0.307341	-0.30667	-0.307341	-0.307341	-0.307341	-0.307341	-0.307061	-0.307127	-0.307266
62669fe8cbcac323242a062e3c6a3386	-0.389426	-0.389426	-0.389045	-0.388937	-0.389426	-0.38939	-0.389426	-0.388834	-0.389083	-0.388608	-0.389426	0.968688	-0.389426	-0.389277	-0.389359	-0.389426	-0.389426	-0.389426	-0.389426	2.8067	-0.389426	-0.387907	1.22063	-0.389426	2.82997	-0.389032	-0.389426	-0.389426	-0.389426	-0.389426	-0.389263	3.07295	-0.389382
898eb92ef2d1ef893f7d0c383527b44d	-0.250026	-0.250026	-0.250026	-0.250026	-0.250026	-0.250026	-0.250026	-0.250026	-0.250026	-0.250026	-0.250026	-0.250026	-0.250026	-0.250026	-0.250026	-0.250026	-0.250026	-0.250026	-0.250026	-0.247983	-0.250026	-0.248109	4.05253	-0.250026	-0.250026	-0.249528	-0.250026	-0.250026	-0.250026	-0.250026	-0.249819	-0.249867	3.69344
a900b6678ce86851fb16bfafb87f3326	-0.175458	-0.175458	-0.169556	-0.167941	5.57046	-0.174884	-0.175458	-0.166377	-0.170098	-0.16312	-0.175458	-0.175458	-0.175458	-0.173103	-0.174384	-0.175458	-0.175458	-0.175458	-0.175458	-0.175458	-0.175458	-0.175458	-0.175458	-0.175458	-0.175458	-0.175458	-0.175458	-0.175458	-0.175458	-0.175458	-0.175458	-0.175458	-0.175458
1c281deaf71c6d702d1ddadfa953eac6	-0.428211	-0.428211	-0.427619	-0.427454	-0.428211	-0.428154	-0.428211	-0.427295	-0.427676	-0.426955	-0.428211	-0.428211	0.351387	-0.427978	-0.428105	-0.428211	-0.428211	-0.428211	-0.428211	-0.425407	1.30565	-0.425588	2.1411	-0.428211	-0.428211	2.03256	-0.428211	-0.428211	-0.428211	-0.428211	-0.427928	2.58646	3.13436
d60f301b7a949b89d4ab416fd6023373	-0.174142	-0.174142	-0.174142	-0.174142	-0.174142	-0.174142	-0.174142	-0.174142	-0.174142	-0.174142	-0.174142	-0.174142	-0.174142	-0.174142	-0.174142	-0.174142	-0.174142	-0.174142	-0.174142	5.57048	-0.174142	-0.172971	-0.173825	-0.174142	-0.174142	-0.173838	-0.174142	-0.174142	-0.174142	-0.174142	-0.174016	-0.174045	-0.174108
35b8c10c192360a7cdad628a185e99e5	2.82409	1.51576	-0.354372	-0.354256	-0.354776	-0.354739	-0.354776	-0.354146	-0.354413	-0.353902	-0.354776	-0.354776	-0.354776	-0.35462	-0.354705	2.50808	-0.354776	-0.354776	-0.354776	-0.353228	-0.354776	-0.353323	3.43383	-0.354776	-0.354776	-0.354399	-0.354776	-0.354776	-0.354776	-0.354776	-0.354619	-0.354656	-0.354734
223141ee97781bbede60bb494d599448	-0.174158	-0.174158	-0.17382	-0.173722	-0.174158	-0.174126	-0.174158	-0.173629	-0.173854	-0.173424	-0.174158	-0.174158	5.57048	-0.174027	-0.174098	-0.174158	-0.174158	-0.174158	-0.174158	-0.174158	-0.174158	-0.174158	-0.174158	-0.174158	-0.174158	-0.174158	-0.174158	-0.174158	-0.174158	-0.174158	-0.174158	-0.174158	-0.174158
f3028e6e91b09bef83702f3ed00265b1	-0.213248	-0.213248	-0.213248	-0.213248	-0.213248	-0.213248	-0.213248	-0.213248	-0.213248	-0.213248	-0.213248	-0.213248	-0.213248	-0.213248	-0.213248	-0.213248	-0.213248	-0.213248	-0.213248	5.49842	-0.213248	-0.212547	-0.213059	-0.213248	-0.213248	0.434658	-0.213248	-0.213248	-0.213248	-0.213248	-0.213173	-0.21319	0.463345
08eedcaf8f982611c4982038139f6271	-0.174221	-0.174221	-0.174221	-0.174221	-0.174221	-0.174221	-0.174221	-0.174221	-0.174221	-0.174221	-0.174221	-0.174221	-0.174221	-0.174221	-0.174221	-0.174221	-0.174221	-0.174221	-0.174221	-0.172429	-0.174221	-0.172539	-0.173766	-0.174221	-0.174221	-0.173785	-0.174221	-0.174221	-0.174221	-0.174221	-0.17404	5.57048	-0.174172
7abe1a64e992e6d4499bd5be03c9e807	0.210738	0.196549	-0.908541	-0.885602	-0.864431	0.90813	1.19941	-0.57938	-0.471293	-0.578208	0.0131754	-0.405049	-1.30374	-0.541944	-0.336069	0.225236	1.72037	3.1677	1.32883	-1.24319	1.06492	1.15848	-0.391836	0.316273	0.473682	-1.5834	-0.394572	0.0794773	0.44025	0.278881	-0.809146	-0.992603	-0.493099
eb780084d3c5b406ff6ff7a4734850ec	-0.272795	-0.272795	-0.27235	1.59114	-0.272795	-0.272753	-0.272795	-0.272102	-0.272394	-0.271836	-0.272795	-0.272795	-0.272795	-0.272621	-0.272716	-0.272795	-0.272795	-0.272795	-0.272795	-0.271032	4.95942	-0.271135	-0.272345	-0.272795	-0.272795	-0.272364	-0.272795	-0.272795	-0.272795	-0.272795	1.62599	-0.272657	-0.272746
1ec2a6a0674989729626ddfb269858eb	-0.28083	-0.28083	-0.279948	0.989823	5.25278	-0.280747	-0.28083	0.307086	-0.280037	-0.278921	0.275779	-0.28083	-0.28083	-0.280488	-0.280675	-0.28083	-0.28083	-0.28083	-0.28083	-0.278655	-0.28083	-0.278611	-0.280207	-0.28083	-0.28083	-0.280244	-0.28083	-0.28083	-0.28083	1.02749	-0.280578	-0.280636	-0.280761
be04d66c58de24bdbf386e040b202875	-0.247718	-0.247718	-0.247718	-0.247718	-0.247718	-0.247718	-0.247718	-0.247718	-0.247718	-0.247718	-0.247718	-0.247718	-0.247718	-0.247718	-0.247718	-0.247718	-0.247718	-0.247718	-0.247718	3.27725	-0.247718	-0.246464	-0.247379	-0.247718	4.39982	-0.247393	-0.247718	-0.247718	-0.247718	-0.247718	-0.247583	-0.247615	-0.247682
e9401f3db9527e1a57b19c9117442afc	-0.174364	-0.174364	-0.174364	-0.174364	-0.174364	-0.174364	-0.174364	-0.174364	-0.174364	-0.174364	-0.174364	-0.174364	-0.174364	-0.174364	-0.174364	-0.174364	-0.174364	-0.174364	-0.174364	-0.170944	-0.174364	-0.171087	-0.17347	-0.174364	-0.174364	-0.17351	-0.174364	5.57048	-0.174364	-0.174364	-0.174006	-0.17409	-0.174268
2af3987617c79b4197259eefcc6ca5ac	-0.175185	-0.175185	-0.175185	-0.175185	-0.175185	-0.175185	-0.175185	-0.175185	-0.175185	-0.175185	-0.175185	-0.175185	-0.175185	-0.175185	-0.175185	-0.175185	-0.175185	-0.175185	-0.175185	-0.162059	-0.175185	-0.161931	-0.171483	-0.175185	-0.175185	-0.171693	-0.175185	-0.175185	-0.175185	-0.175185	-0.173689	5.57046	-0.17478
50c77a7d7927650d7b1a093e9d2c62de	0.837383	-0.281841	-0.281175	-0.280991	-0.281841	-0.281777	-0.281841	-0.280813	-0.281237	-0.28044	-0.281841	-0.281841	-0.281841	-0.281577	-0.281721	-0.281841	-0.281841	-0.281841	-0.281841	-0.27842	-0.281841	-0.278613	3.85528	-0.281841	-0.281841	-0.281003	-0.281841	-0.281841	-0.281841	-0.281841	-0.281492	3.74964	-0.281747
eee617817ba722e01d2fc37a3819b87f	-0.298473	-0.298473	-0.298149	-0.298055	-0.298473	-0.298443	-0.298473	5.25812	0.493468	0.954269	-0.298473	-0.298473	0.098955	-0.298348	-0.298417	-0.298473	-0.298473	-0.298473	-0.298473	-0.297324	-0.298473	-0.297382	-0.298177	-0.298473	-0.298473	-0.29819	-0.298473	-0.298473	-0.298473	-0.298473	0.668119	0.58204	-0.298442
0fde62806e4413be1846e836dba2c786	-0.174448	-0.174448	-0.174448	-0.174448	-0.174448	-0.174448	-0.174448	-0.174448	-0.174448	-0.174448	-0.174448	-0.174448	-0.174448	-0.174448	-0.174448	5.57048	-0.174448	-0.174448	-0.174448	-0.170062	-0.174448	-0.170199	-0.173283	-0.174448	-0.174448	-0.173339	-0.174448	-0.174448	-0.174448	-0.174448	-0.173981	-0.174091	-0.174322
2ce88e05f1919882b01289628bd3d156	-0.174371	-0.174371	-0.174371	-0.174371	-0.174371	-0.174371	-0.174371	-0.174371	-0.174371	-0.174371	-0.174371	-0.174371	-0.174371	-0.174371	-0.174371	-0.174371	-0.174371	-0.174371	-0.174371	-0.170876	-0.174371	-0.171012	-0.173453	5.57048	-0.174371	-0.173495	-0.174371	-0.174371	-0.174371	-0.174371	-0.174004	-0.17409	-0.174272
501a3e687c65822914e1a727e5f43331	-0.174241	5.57048	-0.173549	-0.173351	-0.174241	-0.174176	-0.174241	-0.173162	-0.173619	-0.172746	-0.174241	-0.174241	-0.174241	-0.173972	-0.174119	-0.174241	-0.174241	-0.174241	-0.174241	-0.174241	-0.174241	-0.174241	-0.174241	-0.174241	-0.174241	-0.174241	-0.174241	-0.174241	-0.174241	-0.174241	-0.174241	-0.174241	-0.174241
975aa5c886989b5d915be8945a42cb54	-0.17454	-0.17454	-0.17454	-0.17454	-0.17454	-0.17454	-0.17454	-0.17454	-0.17454	-0.17454	-0.17454	-0.17454	-0.17454	-0.17454	-0.17454	-0.17454	-0.17454	-0.17454	-0.17454	-0.168872	-0.17454	-0.169088	-0.17305	-0.17454	-0.17454	-0.173118	-0.17454	-0.17454	-0.17454	-0.17454	-0.173943	5.57048	-0.174379
af140e3881d1c74ce8b17a5c8979dfa5	0.210738	0.196549	-0.908541	-0.885602	-0.864431	0.90813	1.19941	-0.57938	-0.471293	-0.578208	0.0131754	-0.405049	-1.30374	-0.541944	-0.336069	0.225236	1.72037	3.1677	1.32883	-1.24319	1.06492	1.15848	-0.391836	0.316273	0.473682	-1.5834	-0.394572	0.0794773	0.44025	0.278881	-0.809146	-0.992603	-0.493099
f3f57fb4feeef35aada1a409a3352520	0.210738	0.196549	-0.908541	-0.885602	-0.864431	0.90813	1.19941	-0.57938	-0.471293	-0.578208	0.0131754	-0.405049	-1.30374	-0.541944	-0.336069	0.225236	1.72037	3.1677	1.32883	-1.24319	1.06492	1.15848	-0.391836	0.316273	0.473682	-1.5834	-0.394572	0.0794773	0.44025	0.278881	-0.809146	-0.992603	-0.493099
d0cfe5af02d5f798c52362ab6ac73569	0.210738	0.196549	-0.908541	-0.885602	-0.864431	0.90813	1.19941	-0.57938	-0.471293	-0.578208	0.0131754	-0.405049	-1.30374	-0.541944	-0.336069	0.225236	1.72037	3.1677	1.32883	-1.24319	1.06492	1.15848	-0.391836	0.316273	0.473682	-1.5834	-0.394572	0.0794773	0.44025	0.278881	-0.809146	-0.992603	-0.493099
dedfcb3f28c623281052a961a5e2864c	0.210738	0.196549	-0.908541	-0.885602	-0.864431	0.90813	1.19941	-0.57938	-0.471293	-0.578208	0.0131754	-0.405049	-1.30374	-0.541944	-0.336069	0.225236	1.72037	3.1677	1.32883	-1.24319	1.06492	1.15848	-0.391836	0.316273	0.473682	-1.5834	-0.394572	0.0794773	0.44025	0.278881	-0.809146	-0.992603	-0.493099
f54447ae705d557e2c2b3777fbdd56f0	-0.404276	-0.404276	1.41379	3.0066	1.67905	-0.404206	-0.404276	-0.403103	2.60384	-0.402647	-0.404276	-0.404276	-0.404276	-0.403985	-0.404145	-0.404276	-0.404276	-0.404276	-0.404276	-0.401711	-0.404276	-0.401815	-0.403604	-0.404276	-0.404276	-0.403635	-0.404276	-0.404276	-0.404276	-0.404276	2.60654	-0.40407	-0.404204
6e77545756ddc39c81c925b6fb1c8b17	-0.233407	-0.233407	-0.233094	-0.233003	-0.233407	-0.233378	-0.233407	-0.232917	5.05963	-0.232727	-0.233407	-0.233407	-0.233407	-0.233286	-0.233352	-0.233407	-0.233407	-0.233407	-0.233407	-0.232232	-0.233407	-0.232303	-0.233108	-0.233407	-0.233407	2.17108	-0.233407	-0.233407	-0.233407	-0.233407	-0.233288	-0.233316	-0.233375
e07164dc4c344fb8e6717042190ef640	-0.249151	-0.249151	-0.249151	-0.249151	-0.249151	-0.249151	-0.249151	-0.249151	-0.249151	-0.249151	-0.249151	-0.249151	-0.249151	-0.249151	-0.249151	-0.249151	-0.249151	3.47705	-0.249151	-0.247133	-0.249151	-0.247245	-0.248634	4.24128	-0.249151	-0.248656	-0.249151	-0.249151	-0.249151	-0.249151	-0.248945	-0.248993	-0.249095
de6d4db1f82eeba7ec07206846619c2c	-0.370412	-0.370412	-0.370412	-0.370412	-0.370412	-0.370412	-0.370412	-0.370412	-0.370412	-0.370412	-0.370412	-0.370412	-0.370412	-0.370412	-0.370412	-0.370412	-0.370412	-0.370412	4.60686	1.1406	-0.370412	-0.368912	-0.370007	-0.370412	1.43069	0.12473	-0.370412	-0.370412	-0.370412	-0.370412	-0.37025	1.15346	1.54271
ebd96cb375290c7c8c509c9e8e3cbfbb	-0.174185	-0.174185	-0.17373	-0.173599	5.57048	-0.174143	-0.174185	-0.173474	-0.173776	-0.173198	-0.174185	-0.174185	-0.174185	-0.174009	-0.174106	-0.174185	-0.174185	-0.174185	-0.174185	-0.174185	-0.174185	-0.174185	-0.174185	-0.174185	-0.174185	-0.174185	-0.174185	-0.174185	-0.174185	-0.174185	-0.174185	-0.174185	-0.174185
094308f7cc2ee9d02683e9be4dec556f	-0.174395	-0.174395	-0.173032	-0.172647	-0.174395	5.57048	-0.174395	-0.172279	-0.173166	-0.171481	-0.174395	-0.174395	-0.174395	-0.173861	-0.174152	-0.174395	-0.174395	-0.174395	-0.174395	-0.174395	-0.174395	-0.174395	-0.174395	-0.174395	-0.174395	-0.174395	-0.174395	-0.174395	-0.174395	-0.174395	-0.174395	-0.174395	-0.174395
62dc76a09326c359be5946507e82e9fa	-0.24933	-0.24933	-0.24933	-0.24933	-0.24933	-0.24933	-0.24933	-0.24933	-0.24933	-0.24933	-0.24933	-0.24933	-0.24933	-0.24933	-0.24933	-0.24933	-0.24933	-0.24933	-0.24933	-0.239349	-0.24933	-0.239629	-0.246667	4.30156	-0.24933	3.40315	-0.24933	-0.24933	-0.24933	-0.24933	-0.248261	-0.248512	-0.249042
08ce27cee52afc14d82faaae7852a600	0.210738	0.196549	-0.908541	-0.885602	-0.864431	0.90813	1.19941	-0.57938	-0.471293	-0.578208	0.0131754	-0.405049	-1.30374	-0.541944	-0.336069	0.225236	1.72037	3.1677	1.32883	-1.24319	1.06492	1.15848	-0.391836	0.316273	0.473682	-1.5834	-0.394572	0.0794773	0.44025	0.278881	-0.809146	-0.992603	-0.493099
a6814253a38248cacced10ba5b2e3b1d	-0.174224	-0.174224	-0.173444	-0.17322	-0.174224	-0.174151	-0.174224	5.57048	-0.173522	-0.172537	-0.174224	-0.174224	-0.174224	-0.173921	-0.174087	-0.174224	-0.174224	-0.174224	-0.174224	-0.174224	-0.174224	-0.174224	-0.174224	-0.174224	-0.174224	-0.174224	-0.174224	-0.174224	-0.174224	-0.174224	-0.174224	-0.174224	-0.174224
181053a529759ddc7061f564ed875072	-0.174116	-0.174116	-0.173956	-0.173909	-0.174116	-0.174101	5.57048	-0.173866	-0.173972	-0.173769	-0.174116	-0.174116	-0.174116	-0.174054	-0.174087	-0.174116	-0.174116	-0.174116	-0.174116	-0.174116	-0.174116	-0.174116	-0.174116	-0.174116	-0.174116	-0.174116	-0.174116	-0.174116	-0.174116	-0.174116	-0.174116	-0.174116	-0.174116
f44404ea806c18f6b05b7cbb4f3e5fd2	-0.174373	-0.174373	-0.173122	-0.172764	-0.174373	-0.174256	-0.174373	-0.172423	-0.173248	-0.171671	-0.174373	-0.174373	5.57048	-0.173887	-0.174153	-0.174373	-0.174373	-0.174373	-0.174373	-0.174373	-0.174373	-0.174373	-0.174373	-0.174373	-0.174373	-0.174373	-0.174373	-0.174373	-0.174373	-0.174373	-0.174373	-0.174373	-0.174373
bf611493002f5918a68778bde2def567	-0.174435	-0.174435	-0.174435	-0.174435	-0.174435	-0.174435	-0.174435	-0.174435	-0.174435	-0.174435	-0.174435	-0.174435	-0.174435	-0.174435	-0.174435	-0.174435	-0.174435	-0.174435	-0.174435	-0.17018	-0.174435	-0.170349	-0.173319	-0.174435	-0.174435	-0.17337	5.57048	-0.174435	-0.174435	-0.174435	-0.173988	-0.174093	-0.174314
985d393fa821d0573e828676604e0bef	-0.174151	-0.174151	-0.174151	-0.174151	-0.174151	-0.174151	-0.174151	-0.174151	-0.174151	-0.174151	-0.174151	-0.174151	-0.174151	-0.174151	-0.174151	-0.174151	-0.174151	-0.174151	-0.174151	-0.173256	-0.174151	-0.173313	-0.173925	5.57048	-0.174151	-0.173934	-0.174151	-0.174151	-0.174151	-0.174151	-0.174061	-0.174082	-0.174127
dc39a8363a0619e382ad6bdf64622a08	-0.303763	-0.303763	-0.303763	-0.303763	-0.303763	-0.303763	-0.303763	-0.303763	-0.303763	-0.303763	-0.303763	-0.303763	-0.303763	-0.303763	-0.303763	-0.303763	-0.303763	-0.303763	1.61611	4.87359	-0.303763	-0.302434	-0.303404	-0.303763	1.53046	0.786974	-0.303763	-0.303763	-0.303763	-0.303763	-0.30362	-0.303653	-0.303724
df4d1c713c5dba30c53365d6a47af819	-0.174328	-0.174328	-0.174328	-0.174328	-0.174328	-0.174328	-0.174328	-0.174328	-0.174328	-0.174328	-0.174328	-0.174328	-0.174328	-0.174328	-0.174328	5.57048	-0.174328	-0.174328	-0.174328	-0.171339	-0.174328	-0.171472	-0.173549	-0.174328	-0.174328	-0.173584	-0.174328	-0.174328	-0.174328	-0.174328	-0.174016	-0.174089	-0.174244
2f92bd90292ec10b4f35c0700e75bb49	-0.174163	-0.174163	-0.174163	-0.174163	-0.174163	-0.174163	-0.174163	-0.174163	-0.174163	-0.174163	-0.174163	-0.174163	-0.174163	-0.174163	-0.174163	-0.174163	-0.174163	-0.174163	-0.174163	-0.173089	-0.174163	-0.17316	-0.173892	-0.174163	-0.174163	-0.173903	-0.174163	-0.174163	-0.174163	-0.174163	5.57048	-0.17408	-0.174134
ac23bd25b1cadc455e0fbffb7b8cf142	-0.248415	-0.248415	-0.248094	-0.248001	-0.248415	-0.248386	-0.248415	4.32327	3.37597	-0.247717	-0.248415	-0.248415	-0.248415	-0.248291	-0.248359	-0.248415	-0.248415	-0.248415	-0.248415	-0.248415	-0.248415	-0.248415	-0.248415	-0.248415	-0.248415	-0.248415	-0.248415	-0.248415	-0.248415	-0.248415	-0.248415	-0.248415	-0.248415
10818b56d1dcd6105071a8222d85a914	0.210738	0.196549	-0.908541	-0.885602	-0.864431	0.90813	1.19941	-0.57938	-0.471293	-0.578208	0.0131754	-0.405049	-1.30374	-0.541944	-0.336069	0.225236	1.72037	3.1677	1.32883	-1.24319	1.06492	1.15848	-0.391836	0.316273	0.473682	-1.5834	-0.394572	0.0794773	0.44025	0.278881	-0.809146	-0.992603	-0.493099
51111e66d97d8fd3f0bdf584d69c7835	-0.174138	5.57048	-0.173882	-0.173808	-0.174138	-0.174114	-0.174138	-0.173738	-0.173908	-0.173583	-0.174138	-0.174138	-0.174138	-0.174039	-0.174093	-0.174138	-0.174138	-0.174138	-0.174138	-0.174138	-0.174138	-0.174138	-0.174138	-0.174138	-0.174138	-0.174138	-0.174138	-0.174138	-0.174138	-0.174138	-0.174138	-0.174138	-0.174138
17cddb82ce2f004cd99f8fb8e90daae2	-0.247471	-0.247471	4.46103	-0.243477	-0.247471	-0.247177	-0.247471	3.19504	-0.244663	-0.240809	-0.247471	-0.247471	-0.247471	-0.246252	-0.246918	-0.247471	-0.247471	-0.247471	-0.247471	-0.247471	-0.247471	-0.247471	-0.247471	-0.247471	-0.247471	-0.247471	-0.247471	-0.247471	-0.247471	-0.247471	-0.247471	-0.247471	-0.247471
c90c84fcedcf16c61b02c306acafeeb5	-0.174114	-0.174114	-0.1739	-0.173839	-0.174114	-0.174094	-0.174114	-0.17378	-0.173922	5.57048	-0.174114	-0.174114	-0.174114	-0.174031	-0.174076	-0.174114	-0.174114	-0.174114	-0.174114	-0.174114	-0.174114	-0.174114	-0.174114	-0.174114	-0.174114	-0.174114	-0.174114	-0.174114	-0.174114	-0.174114	-0.174114	-0.174114	-0.174114
f0cddcaefcdf8e540c1afb9520f701b7	-0.248714	-0.248714	-0.248714	-0.248714	-0.248714	-0.248714	-0.248714	-0.248714	-0.248714	-0.248714	-0.248714	-0.248714	-0.248714	-0.248714	-0.248714	-0.248714	-0.248714	-0.248714	-0.248714	-0.247379	-0.248714	-0.247465	3.41446	-0.248714	-0.248714	-0.24839	-0.248714	4.29249	-0.248714	-0.248714	-0.248579	-0.248611	-0.248678
e2a021a1cdada63fc8bd0b277b205f48	0.210738	0.196549	-0.908541	-0.885602	-0.864431	0.90813	1.19941	-0.57938	-0.471293	-0.578208	0.0131754	-0.405049	-1.30374	-0.541944	-0.336069	0.225236	1.72037	3.1677	1.32883	-1.24319	1.06492	1.15848	-0.391836	0.316273	0.473682	-1.5834	-0.394572	0.0794773	0.44025	0.278881	-0.809146	-0.992603	-0.493099
d92d53b67f4b4a2516ca359494db4c24	0.210738	0.196549	-0.908541	-0.885602	-0.864431	0.90813	1.19941	-0.57938	-0.471293	-0.578208	0.0131754	-0.405049	-1.30374	-0.541944	-0.336069	0.225236	1.72037	3.1677	1.32883	-1.24319	1.06492	1.15848	-0.391836	0.316273	0.473682	-1.5834	-0.394572	0.0794773	0.44025	0.278881	-0.809146	-0.992603	-0.493099
646ce7e45794e2cacc0d6acf2cf3c6ed	0.210738	0.196549	-0.908541	-0.885602	-0.864431	0.90813	1.19941	-0.57938	-0.471293	-0.578208	0.0131754	-0.405049	-1.30374	-0.541944	-0.336069	0.225236	1.72037	3.1677	1.32883	-1.24319	1.06492	1.15848	-0.391836	0.316273	0.473682	-1.5834	-0.394572	0.0794773	0.44025	0.278881	-0.809146	-0.992603	-0.493099
97ab46e472f196f98d19d049cc6980c2	-0.174143	-0.174143	-0.173854	-0.17377	-0.174143	-0.174116	-0.174143	-0.173691	-0.173883	-0.173516	-0.174143	-0.174143	-0.174143	5.57048	-0.174092	-0.174143	-0.174143	-0.174143	-0.174143	-0.174143	-0.174143	-0.174143	-0.174143	-0.174143	-0.174143	-0.174143	-0.174143	-0.174143	-0.174143	-0.174143	-0.174143	-0.174143	-0.174143
c0edea80a4d623eb75e03daa3536a4dc	0.210738	0.196549	-0.908541	-0.885602	-0.864431	0.90813	1.19941	-0.57938	-0.471293	-0.578208	0.0131754	-0.405049	-1.30374	-0.541944	-0.336069	0.225236	1.72037	3.1677	1.32883	-1.24319	1.06492	1.15848	-0.391836	0.316273	0.473682	-1.5834	-0.394572	0.0794773	0.44025	0.278881	-0.809146	-0.992603	-0.493099
00cd2f68603124759047487807589f27	-0.374026	-0.374026	-0.373416	2.08246	1.07935	-0.373969	-0.374026	-0.373074	1.15174	-0.372705	-0.374026	-0.374026	-0.374026	-0.373789	-0.373919	-0.374026	-0.374026	-0.374026	-0.374026	-0.371727	-0.374026	-0.37186	4.15865	-0.374026	-0.374026	-0.373463	1.99174	-0.374026	-0.374026	-0.374026	-0.373791	-0.373847	-0.373963
5876eaf1edc6de9da146606ebb76ef0e	-0.17474	-0.17474	-0.17474	-0.17474	-0.17474	-0.17474	-0.17474	-0.17474	-0.17474	-0.17474	-0.17474	-0.17474	-0.17474	-0.17474	-0.17474	-0.17474	-0.17474	-0.17474	-0.17474	-0.167118	-0.17474	-0.167077	-0.172604	-0.17474	-0.17474	-0.172722	-0.17474	-0.17474	5.57048	-0.17474	-0.173877	-0.174079	-0.174506
80dd71f0135ba7b0b937f699b90d18d8	-0.245393	-0.245393	-0.244276	3.00781	-0.245393	-0.245288	-0.245393	-0.243651	-0.244389	-0.242979	-0.245393	4.59236	-0.245393	-0.244959	-0.245197	-0.245393	-0.245393	-0.245393	-0.245393	-0.245393	-0.245393	-0.245393	-0.245393	-0.245393	-0.245393	-0.245393	-0.245393	-0.245393	-0.245393	-0.245393	-0.245393	-0.245393	-0.245393
f77a4cf04f5adf93dc5755b529482012	-0.174198	-0.174198	-0.173556	-0.173372	-0.174198	-0.174138	-0.174198	5.57048	-0.173621	-0.172809	-0.174198	-0.174198	-0.174198	-0.173949	-0.174085	-0.174198	-0.174198	-0.174198	-0.174198	-0.174198	-0.174198	-0.174198	-0.174198	-0.174198	-0.174198	-0.174198	-0.174198	-0.174198	-0.174198	-0.174198	-0.174198	-0.174198	-0.174198
1b7d75fb86963bedb10092b550a0899f	0.210738	0.196549	-0.908541	-0.885602	-0.864431	0.90813	1.19941	-0.57938	-0.471293	-0.578208	0.0131754	-0.405049	-1.30374	-0.541944	-0.336069	0.225236	1.72037	3.1677	1.32883	-1.24319	1.06492	1.15848	-0.391836	0.316273	0.473682	-1.5834	-0.394572	0.0794773	0.44025	0.278881	-0.809146	-0.992603	-0.493099
d3d5f57b1c8aafeca61afdb1627d2990	-0.224151	-0.224151	-0.223715	-0.223589	-0.224151	-0.224111	-0.224151	-0.22347	5.25078	-0.223205	-0.224151	-0.224151	1.69499	-0.223982	-0.224075	-0.224151	-0.224151	-0.224151	-0.224151	-0.224151	-0.224151	-0.224151	-0.224151	-0.224151	-0.224151	-0.224151	-0.224151	-0.224151	-0.224151	-0.224151	-0.224151	-0.224151	-0.224151
b12e4aab4d4ca5f14d932ff0e2b7b2c4	-0.174206	-0.174206	-0.174206	-0.174206	-0.174206	-0.174206	-0.174206	-0.174206	-0.174206	-0.174206	-0.174206	-0.174206	-0.174206	-0.174206	-0.174206	-0.174206	-0.174206	5.57048	-0.174206	-0.172675	-0.174206	-0.172745	-0.173808	-0.174206	-0.174206	-0.173825	-0.174206	-0.174206	-0.174206	-0.174206	-0.174046	-0.174084	-0.174163
7215e6796de3e835c8879da79b1b708d	-0.174954	-0.174954	-0.174954	-0.174954	-0.174954	-0.174954	-0.174954	-0.174954	-0.174954	-0.174954	-0.174954	-0.174954	-0.174954	-0.174954	-0.174954	-0.174954	-0.174954	-0.174954	5.57047	-0.165221	-0.174954	-0.164711	-0.172035	-0.174954	-0.174954	-0.172229	-0.174954	-0.174954	-0.174954	-0.174954	-0.173764	-0.174041	-0.174629
d2be1254f5e7eb97bd42ec342d9cb11d	-0.174784	-0.174784	-0.174784	-0.174784	-0.174784	-0.174784	-0.174784	-0.174784	-0.174784	-0.174784	-0.174784	-0.174784	-0.174784	-0.174784	-0.174784	-0.174784	-0.174784	-0.174784	-0.174784	-0.166181	-0.174784	-0.166311	-0.172444	-0.174784	-0.174784	-0.172563	-0.174784	-0.174784	-0.174784	-0.174784	5.57047	-0.174063	-0.174529
15463e67c2a18d48fb5cd3e9009eb96c	0.210738	0.196549	-0.908541	-0.885602	-0.864431	0.90813	1.19941	-0.57938	-0.471293	-0.578208	0.0131754	-0.405049	-1.30374	-0.541944	-0.336069	0.225236	1.72037	3.1677	1.32883	-1.24319	1.06492	1.15848	-0.391836	0.316273	0.473682	-1.5834	-0.394572	0.0794773	0.44025	0.278881	-0.809146	-0.992603	-0.493099
649a8a7f2d1ff8fa3b25968d57bc9b9e	-0.247437	4.43919	-0.246442	-0.246157	-0.247437	-0.247344	-0.247437	-0.245885	3.22473	-0.245287	-0.247437	-0.247437	-0.247437	-0.24705	-0.247262	-0.247437	-0.247437	-0.247437	-0.247437	-0.247437	-0.247437	-0.247437	-0.247437	-0.247437	-0.247437	-0.247437	-0.247437	-0.247437	-0.247437	-0.247437	-0.247437	-0.247437	-0.247437
350fb0a153502ce2dd4fa0cf051d3fbb	-0.233046	-0.233046	2.15314	-0.232332	-0.233046	-0.232994	-0.233046	-0.232181	-0.232548	-0.231845	-0.233046	-0.233046	-0.233046	-0.232831	5.06774	-0.233046	-0.233046	-0.233046	-0.233046	-0.233046	-0.233046	-0.233046	-0.233046	-0.233046	-0.233046	-0.233046	-0.233046	-0.233046	-0.233046	-0.233046	-0.233046	-0.233046	-0.233046
13506518b825bfbd65794347af5958c6	-0.210349	-0.210349	-0.209925	-0.209804	1.0866	-0.210309	-0.210349	-0.209689	-0.209967	-0.209438	-0.210349	-0.210349	-0.210349	-0.210183	-0.210274	-0.210349	-0.210349	-0.210349	-0.210349	-0.208609	-0.210349	-0.208711	5.42685	-0.210349	-0.210349	-0.209924	-0.210349	-0.210349	-0.210349	-0.210349	-0.210172	-0.210214	-0.210301
57198189b430ee1f53f1fe1f16d3c67b	-0.245651	-0.245651	-0.244757	-0.2445	-0.245651	-0.245568	-0.245651	3.03768	-0.244847	-0.243717	4.57214	-0.245651	-0.245651	-0.245304	-0.245494	-0.245651	-0.245651	-0.245651	-0.245651	-0.245651	-0.245651	-0.245651	-0.245651	-0.245651	-0.245651	-0.245651	-0.245651	-0.245651	-0.245651	-0.245651	-0.245651	-0.245651	-0.245651
0f276b28ea3ba352f6fd667c1e298c38	-0.174651	-0.174651	-0.172214	-0.171528	-0.174651	-0.17442	-0.174651	-0.170871	-0.17245	-0.169456	-0.174651	5.57048	-0.174651	-0.173694	-0.174217	-0.174651	-0.174651	-0.174651	-0.174651	-0.174651	-0.174651	-0.174651	-0.174651	-0.174651	-0.174651	-0.174651	-0.174651	-0.174651	-0.174651	-0.174651	-0.174651	-0.174651	-0.174651
34e330f47d6b0b3a7742855c99c1730b	0.210738	0.196549	-0.908541	-0.885602	-0.864431	0.90813	1.19941	-0.57938	-0.471293	-0.578208	0.0131754	-0.405049	-1.30374	-0.541944	-0.336069	0.225236	1.72037	3.1677	1.32883	-1.24319	1.06492	1.15848	-0.391836	0.316273	0.473682	-1.5834	-0.394572	0.0794773	0.44025	0.278881	-0.809146	-0.992603	-0.493099
b72909635060381035aa822951ccee03	-0.258136	-0.258136	-0.258136	-0.258136	-0.258136	-0.258136	-0.258136	-0.258136	-0.258136	-0.258136	-0.258136	-0.258136	-0.258136	-0.258136	-0.258136	4.67421	-0.258136	-0.258136	-0.258136	0.219311	-0.258136	-0.255854	2.84718	-0.258136	-0.258136	-0.257543	-0.258136	-0.258136	-0.258136	-0.258136	-0.257889	-0.257947	-0.258069
8636ffaa66aa67a74fe045f74b831966	-0.207121	-0.207121	-0.207121	-0.207121	-0.207121	-0.207121	-0.207121	-0.207121	-0.207121	-0.207121	-0.207121	-0.207121	-0.207121	-0.207121	-0.207121	-0.207121	-0.207121	-0.207121	-0.207121	5.45335	-0.207121	-0.205966	-0.206809	-0.207121	0.965385	-0.206822	-0.207121	-0.207121	-0.207121	-0.207121	-0.206997	-0.207026	-0.207088
33f1cbce4b235f9a1a34da82a691f6bd	-0.174217	-0.174217	-0.174217	-0.174217	-0.174217	-0.174217	-0.174217	-0.174217	-0.174217	-0.174217	-0.174217	-0.174217	-0.174217	-0.174217	-0.174217	-0.174217	-0.174217	-0.174217	-0.174217	-0.17236	-0.174217	-0.172479	-0.173747	-0.174217	-0.174217	5.57048	-0.174217	-0.174217	-0.174217	-0.174217	-0.174029	-0.174073	-0.174166
5a5dc75a7fe8a314a2510fa53aba2bee	-0.243932	-0.243932	-0.243932	-0.243932	-0.243932	-0.243932	-0.243932	-0.243932	-0.243932	-0.243932	-0.243932	-0.243932	-0.243932	-0.243932	-0.243932	-0.243932	-0.243932	-0.243932	-0.243932	-0.240342	-0.243932	-0.240554	-0.243017	-0.243932	-0.243932	4.68027	-0.243932	-0.243932	-0.243932	-0.243932	-0.243567	-0.243652	2.87308
e1d34bfaee639f5be81d28b8b33c5e2f	-0.238464	2.46189	-0.237711	-0.237497	-0.238464	-0.238393	-0.238464	-0.237294	-0.237785	-0.236851	-0.238464	-0.238464	-0.238464	-0.238169	-0.238331	-0.238464	-0.238464	-0.238464	-0.238464	-0.235455	-0.238464	-0.235595	4.91756	-0.238464	-0.238464	-0.237718	-0.238464	-0.238464	-0.238464	-0.238464	-0.238152	-0.238225	-0.23838
57e11c3559fa2ef79a2702684229e4ba	-0.174473	-0.174473	-0.174473	-0.174473	-0.174473	-0.174473	-0.174473	-0.174473	-0.174473	-0.174473	-0.174473	-0.174473	-0.174473	-0.174473	-0.174473	-0.174473	-0.174473	-0.174473	-0.174473	-0.169771	-0.174473	-0.169942	-0.173234	-0.174473	-0.174473	-0.173291	5.57048	-0.174473	-0.174473	-0.174473	-0.173977	-0.174093	-0.174339
afb805c9b9630f46d285fd1895878286	-0.174169	-0.174169	-0.174169	-0.174169	-0.174169	-0.174169	-0.174169	-0.174169	-0.174169	-0.174169	-0.174169	-0.174169	-0.174169	-0.174169	-0.174169	-0.174169	-0.174169	-0.174169	-0.174169	-0.173063	-0.174169	-0.173131	-0.173888	-0.174169	-0.174169	-0.1739	-0.174169	-0.174169	5.57048	-0.174169	-0.174057	-0.174083	-0.174139
577803f3876eb718cf8784b21f5ad1de	0.210738	0.196549	-0.908541	-0.885602	-0.864431	0.90813	1.19941	-0.57938	-0.471293	-0.578208	0.0131754	-0.405049	-1.30374	-0.541944	-0.336069	0.225236	1.72037	3.1677	1.32883	-1.24319	1.06492	1.15848	-0.391836	0.316273	0.473682	-1.5834	-0.394572	0.0794773	0.44025	0.278881	-0.809146	-0.992603	-0.493099
0fa9b2ca1527c33928e33283f5f5fcc5	-0.174212	-0.174212	-0.173644	-0.17348	-0.174212	-0.174159	-0.174212	-0.173324	-0.173701	-0.172979	-0.174212	-0.174212	5.57048	-0.173992	-0.174112	-0.174212	-0.174212	-0.174212	-0.174212	-0.174212	-0.174212	-0.174212	-0.174212	-0.174212	-0.174212	-0.174212	-0.174212	-0.174212	-0.174212	-0.174212	-0.174212	-0.174212	-0.174212
2c064ac1dddc6cb98a5ca584a68647f8	0.210738	0.196549	-0.908541	-0.885602	-0.864431	0.90813	1.19941	-0.57938	-0.471293	-0.578208	0.0131754	-0.405049	-1.30374	-0.541944	-0.336069	0.225236	1.72037	3.1677	1.32883	-1.24319	1.06492	1.15848	-0.391836	0.316273	0.473682	-1.5834	-0.394572	0.0794773	0.44025	0.278881	-0.809146	-0.992603	-0.493099
c7b0d3319113d7e625681d06ac1b0764	-0.174147	-0.174147	-0.173813	-0.173717	-0.174147	-0.174116	-0.174147	-0.173625	5.57048	-0.173422	-0.174147	-0.174147	-0.174147	-0.174018	-0.174089	-0.174147	-0.174147	-0.174147	-0.174147	-0.174147	-0.174147	-0.174147	-0.174147	-0.174147	-0.174147	-0.174147	-0.174147	-0.174147	-0.174147	-0.174147	-0.174147	-0.174147	-0.174147
48e4c74cd6546cb69095ab16afdb69dc	-0.174376	-0.174376	-0.174376	-0.174376	-0.174376	-0.174376	-0.174376	-0.174376	-0.174376	-0.174376	-0.174376	-0.174376	-0.174376	-0.174376	-0.174376	-0.174376	-0.174376	-0.174376	-0.174376	-0.17041	-0.174376	-0.170629	-0.17336	-0.174376	-0.174376	5.57048	-0.174376	-0.174376	-0.174376	-0.174376	-0.17397	-0.174066	-0.174267
83350114f4d6e277159043a6babee33b	0.210738	0.196549	-0.908541	-0.885602	-0.864431	0.90813	1.19941	-0.57938	-0.471293	-0.578208	0.0131754	-0.405049	-1.30374	-0.541944	-0.336069	0.225236	1.72037	3.1677	1.32883	-1.24319	1.06492	1.15848	-0.391836	0.316273	0.473682	-1.5834	-0.394572	0.0794773	0.44025	0.278881	-0.809146	-0.992603	-0.493099
212a80f24d6b5b5282958baab371202b	0.210738	0.196549	-0.908541	-0.885602	-0.864431	0.90813	1.19941	-0.57938	-0.471293	-0.578208	0.0131754	-0.405049	-1.30374	-0.541944	-0.336069	0.225236	1.72037	3.1677	1.32883	-1.24319	1.06492	1.15848	-0.391836	0.316273	0.473682	-1.5834	-0.394572	0.0794773	0.44025	0.278881	-0.809146	-0.992603	-0.493099
185fd5fa18cb1cc8b0fa2bacf60af299	0.210738	0.196549	-0.908541	-0.885602	-0.864431	0.90813	1.19941	-0.57938	-0.471293	-0.578208	0.0131754	-0.405049	-1.30374	-0.541944	-0.336069	0.225236	1.72037	3.1677	1.32883	-1.24319	1.06492	1.15848	-0.391836	0.316273	0.473682	-1.5834	-0.394572	0.0794773	0.44025	0.278881	-0.809146	-0.992603	-0.493099
1970af775bfecdd2ca50180b69989ee0	-0.276789	-0.276789	-0.276213	-0.276047	-0.276789	-0.276735	3.61623	-0.275889	-0.276271	-0.27554	4.02505	-0.276789	-0.276789	-0.276565	-0.276688	-0.276789	-0.276789	-0.276789	-0.276789	-0.275444	0.654222	-0.275405	-0.276399	-0.276789	-0.276789	-0.276423	-0.276789	-0.276789	-0.276789	-0.276789	-0.276631	-0.276668	-0.276746
daf49f53bc72de756418574b24e87184	-0.235625	-0.235625	-0.234122	-0.233699	-0.235625	-0.235483	-0.235625	-0.233294	-0.234269	-0.232419	-0.235625	-0.235625	2.26429	-0.235035	-0.235357	-0.235625	-0.235625	5.01628	-0.235625	-0.231162	-0.235625	-0.231101	-0.234359	-0.235625	-0.235625	-0.234432	-0.235625	-0.235625	-0.235625	-0.235625	-0.235113	-0.235233	-0.235486
c3e8496b70f7341450e298f29c5fa4e5	-0.174433	-0.174433	-0.174433	-0.174433	-0.174433	-0.174433	-0.174433	-0.174433	-0.174433	-0.174433	-0.174433	-0.174433	-0.174433	-0.174433	-0.174433	-0.174433	-0.174433	-0.174433	-0.174433	-0.170015	-0.174433	-0.170208	-0.173281	-0.174433	-0.174433	-0.173333	-0.174433	-0.174433	-0.174433	-0.174433	5.57048	-0.17408	-0.174309
49542b70535b5b25483a9220abd05093	-0.174459	-0.174459	-0.172845	-0.172383	-0.174459	-0.174307	-0.174459	-0.171944	-0.173006	-0.17098	-0.174459	-0.174459	5.57048	-0.17383	-0.174174	-0.174459	-0.174459	-0.174459	-0.174459	-0.174459	-0.174459	-0.174459	-0.174459	-0.174459	-0.174459	-0.174459	-0.174459	-0.174459	-0.174459	-0.174459	-0.174459	-0.174459	-0.174459
ccc13ae080bffecaeebb933d99930076	0.210738	0.196549	-0.908541	-0.885602	-0.864431	0.90813	1.19941	-0.57938	-0.471293	-0.578208	0.0131754	-0.405049	-1.30374	-0.541944	-0.336069	0.225236	1.72037	3.1677	1.32883	-1.24319	1.06492	1.15848	-0.391836	0.316273	0.473682	-1.5834	-0.394572	0.0794773	0.44025	0.278881	-0.809146	-0.992603	-0.493099
ffac4ec15a9162aa65951455b9652aeb	0.210738	0.196549	-0.908541	-0.885602	-0.864431	0.90813	1.19941	-0.57938	-0.471293	-0.578208	0.0131754	-0.405049	-1.30374	-0.541944	-0.336069	0.225236	1.72037	3.1677	1.32883	-1.24319	1.06492	1.15848	-0.391836	0.316273	0.473682	-1.5834	-0.394572	0.0794773	0.44025	0.278881	-0.809146	-0.992603	-0.493099
c668b32936efe9013e931571d7c3b127	0.210738	0.196549	-0.908541	-0.885602	-0.864431	0.90813	1.19941	-0.57938	-0.471293	-0.578208	0.0131754	-0.405049	-1.30374	-0.541944	-0.336069	0.225236	1.72037	3.1677	1.32883	-1.24319	1.06492	1.15848	-0.391836	0.316273	0.473682	-1.5834	-0.394572	0.0794773	0.44025	0.278881	-0.809146	-0.992603	-0.493099
c2236727ffae6d3d4521989084fcbe7b	-0.17455	-0.17455	-0.172548	-0.171978	-0.17455	-0.174362	-0.17455	-0.171434	-0.172747	-0.170245	-0.17455	-0.17455	5.57048	-0.173769	-0.174196	-0.17455	-0.17455	-0.17455	-0.17455	-0.17455	-0.17455	-0.17455	-0.17455	-0.17455	-0.17455	-0.17455	-0.17455	-0.17455	-0.17455	-0.17455	-0.17455	-0.17455	-0.17455
b6bfaff2db0575a697de57b691bcdca6	-0.174906	-0.174906	-0.174906	-0.174906	-0.174906	-0.174906	-0.174906	-0.174906	-0.174906	-0.174906	-0.174906	-0.174906	-0.174906	-0.174906	-0.174906	-0.174906	-0.174906	-0.174906	-0.174906	-0.165477	-0.174906	-0.165288	-0.172207	5.57047	-0.174906	-0.172365	-0.174906	-0.174906	-0.174906	-0.174906	-0.173813	-0.174068	-0.174609
61db0bd527e07336202fd0ff4578c042	-0.174439	-0.174439	-0.174439	-0.174439	-0.174439	-0.174439	-0.174439	-0.174439	-0.174439	-0.174439	-0.174439	-0.174439	-0.174439	-0.174439	-0.174439	-0.174439	-0.174439	-0.174439	-0.174439	-0.16965	-0.174439	-0.169896	-0.173205	-0.174439	-0.174439	5.57048	-0.174439	-0.174439	-0.174439	-0.174439	-0.173946	-0.174062	-0.174306
f960402bc883112f67734dfdde3445b5	-0.174133	-0.174133	-0.173806	-0.173712	-0.174133	-0.174102	-0.174133	-0.173623	-0.173839	5.57048	-0.174133	-0.174133	-0.174133	-0.174006	-0.174076	-0.174133	-0.174133	-0.174133	-0.174133	-0.174133	-0.174133	-0.174133	-0.174133	-0.174133	-0.174133	-0.174133	-0.174133	-0.174133	-0.174133	-0.174133	-0.174133	-0.174133	-0.174133
1841ceeb252a3e471065c84c01175567	-0.249481	4.2	-0.248468	-0.248177	3.52623	-0.249386	-0.249481	-0.2479	-0.24857	-0.24729	-0.249481	-0.249481	-0.249481	-0.249087	-0.249303	-0.249481	-0.249481	-0.249481	-0.249481	-0.249481	-0.249481	-0.249481	-0.249481	-0.249481	-0.249481	-0.249481	-0.249481	-0.249481	-0.249481	-0.249481	-0.249481	-0.249481	-0.249481
4e0a65b0a2fab7bf0f307d360b679d87	-0.210304	-0.210304	-0.209755	-0.209599	-0.210304	-0.210252	-0.210304	-0.20945	-0.209809	-0.209126	-0.210304	-0.210304	1.08151	-0.210089	-0.210206	-0.210304	-0.210304	-0.210304	-0.210304	-0.208051	-0.210304	-0.208181	-0.209728	-0.210304	-0.210304	-0.209753	-0.210304	-0.210304	-0.210304	-0.210304	5.42802	-0.210128	-0.210242
992f0b2cc98ca40445e88a98a044838d	0.210738	0.196549	-0.908541	-0.885602	-0.864431	0.90813	1.19941	-0.57938	-0.471293	-0.578208	0.0131754	-0.405049	-1.30374	-0.541944	-0.336069	0.225236	1.72037	3.1677	1.32883	-1.24319	1.06492	1.15848	-0.391836	0.316273	0.473682	-1.5834	-0.394572	0.0794773	0.44025	0.278881	-0.809146	-0.992603	-0.493099
929c99dbf854b1a24d85a380e7b0af8f	0.210738	0.196549	-0.908541	-0.885602	-0.864431	0.90813	1.19941	-0.57938	-0.471293	-0.578208	0.0131754	-0.405049	-1.30374	-0.541944	-0.336069	0.225236	1.72037	3.1677	1.32883	-1.24319	1.06492	1.15848	-0.391836	0.316273	0.473682	-1.5834	-0.394572	0.0794773	0.44025	0.278881	-0.809146	-0.992603	-0.493099
759456dbbcad59cfb49ade008456f99e	0.210738	0.196549	-0.908541	-0.885602	-0.864431	0.90813	1.19941	-0.57938	-0.471293	-0.578208	0.0131754	-0.405049	-1.30374	-0.541944	-0.336069	0.225236	1.72037	3.1677	1.32883	-1.24319	1.06492	1.15848	-0.391836	0.316273	0.473682	-1.5834	-0.394572	0.0794773	0.44025	0.278881	-0.809146	-0.992603	-0.493099
a7ff44f020b98f586089e693c15762ac	0.210738	0.196549	-0.908541	-0.885602	-0.864431	0.90813	1.19941	-0.57938	-0.471293	-0.578208	0.0131754	-0.405049	-1.30374	-0.541944	-0.336069	0.225236	1.72037	3.1677	1.32883	-1.24319	1.06492	1.15848	-0.391836	0.316273	0.473682	-1.5834	-0.394572	0.0794773	0.44025	0.278881	-0.809146	-0.992603	-0.493099
273fa0191072af3d33e32271b35c8f18	-0.174322	-0.174322	-0.173287	-0.172991	5.57048	-0.174225	-0.174322	-0.172708	-0.173391	-0.172087	-0.174322	-0.174322	-0.174322	-0.17392	-0.17414	-0.174322	-0.174322	-0.174322	-0.174322	-0.174322	-0.174322	-0.174322	-0.174322	-0.174322	-0.174322	-0.174322	-0.174322	-0.174322	-0.174322	-0.174322	-0.174322	-0.174322	-0.174322
767a9761e9034bc6299ae0be816c4df2	-0.242266	-0.242266	-0.242266	-0.242266	-0.242266	-0.242266	-0.242266	-0.242266	-0.242266	-0.242266	-0.242266	-0.242266	-0.242266	-0.242266	-0.242266	-0.242266	-0.242266	-0.242266	-0.242266	5.04981	-0.242266	-0.240077	-0.241674	-0.242266	-0.242266	2.17685	-0.242266	-0.242266	-0.242266	-0.242266	-0.24203	0.0382392	-0.242203
2197e3c697e9c1427ae1c3277d3c71f9	0.210738	0.196549	-0.908541	-0.885602	-0.864431	0.90813	1.19941	-0.57938	-0.471293	-0.578208	0.0131754	-0.405049	-1.30374	-0.541944	-0.336069	0.225236	1.72037	3.1677	1.32883	-1.24319	1.06492	1.15848	-0.391836	0.316273	0.473682	-1.5834	-0.394572	0.0794773	0.44025	0.278881	-0.809146	-0.992603	-0.493099
270a745647e1f4f2daefddcae78b43c7	0.210738	0.196549	-0.908541	-0.885602	-0.864431	0.90813	1.19941	-0.57938	-0.471293	-0.578208	0.0131754	-0.405049	-1.30374	-0.541944	-0.336069	0.225236	1.72037	3.1677	1.32883	-1.24319	1.06492	1.15848	-0.391836	0.316273	0.473682	-1.5834	-0.394572	0.0794773	0.44025	0.278881	-0.809146	-0.992603	-0.493099
54d51ed7cab9675bab2ed4f9f471c484	-0.231778	-0.231778	-0.231267	-0.231121	2.07311	-0.23173	-0.231778	-0.230982	-0.231318	-0.230677	-0.231778	-0.231778	-0.231778	-0.231579	-0.231688	-0.231778	-0.231778	-0.231778	-0.231778	-0.229864	5.10304	-0.229957	-0.231283	-0.231778	-0.231778	-0.231304	-0.231778	-0.231778	-0.231778	-0.231778	-0.23158	-0.231626	-0.231725
11bc72b11af066726c613fcba7b0ea7a	-0.23551	-0.23551	-0.233109	-0.232457	-0.23551	-0.235275	-0.23551	2.23911	-0.233326	-0.230518	-0.23551	-0.23551	-0.23551	-0.234548	-0.23507	-0.23551	-0.23551	-0.23551	-0.23551	5.02818	-0.23551	-0.224626	-0.232486	-0.23551	-0.23551	-0.232649	-0.23551	-0.23551	-0.23551	-0.23551	-0.23429	-0.234576	-0.23518
3fef0aa05ca3465ee472eab252b85c36	-0.269883	-0.269883	-0.269331	-0.269177	0.612474	-0.26983	-0.269883	-0.269029	-0.269384	-0.268713	-0.269883	-0.269883	-0.269883	-0.269665	-0.269784	-0.269883	-0.269883	-0.269883	-0.269883	-0.267347	4.60849	-0.267491	-0.269234	-0.269883	-0.269883	-0.269262	-0.269883	-0.269883	-0.269883	-0.269883	-0.269624	2.86484	-0.269813
7376eb30d4a59d2e35c4a558fa824a08	-0.17425	-0.17425	-0.17352	-0.17331	-0.17425	-0.174182	-0.17425	-0.17311	-0.173594	-0.172668	-0.17425	-0.17425	5.57048	-0.173967	-0.174122	-0.17425	-0.17425	-0.17425	-0.17425	-0.17425	-0.17425	-0.17425	-0.17425	-0.17425	-0.17425	-0.17425	-0.17425	-0.17425	-0.17425	-0.17425	-0.17425	-0.17425	-0.17425
c0d5395792eadbf5f62e8ffb14fa0262	0.210738	0.196549	-0.908541	-0.885602	-0.864431	0.90813	1.19941	-0.57938	-0.471293	-0.578208	0.0131754	-0.405049	-1.30374	-0.541944	-0.336069	0.225236	1.72037	3.1677	1.32883	-1.24319	1.06492	1.15848	-0.391836	0.316273	0.473682	-1.5834	-0.394572	0.0794773	0.44025	0.278881	-0.809146	-0.992603	-0.493099
723174918a7beeccad69ef6fe13bc7e0	0.210738	0.196549	-0.908541	-0.885602	-0.864431	0.90813	1.19941	-0.57938	-0.471293	-0.578208	0.0131754	-0.405049	-1.30374	-0.541944	-0.336069	0.225236	1.72037	3.1677	1.32883	-1.24319	1.06492	1.15848	-0.391836	0.316273	0.473682	-1.5834	-0.394572	0.0794773	0.44025	0.278881	-0.809146	-0.992603	-0.493099
7236a8a675683498e1380f8131038144	0.210738	0.196549	-0.908541	-0.885602	-0.864431	0.90813	1.19941	-0.57938	-0.471293	-0.578208	0.0131754	-0.405049	-1.30374	-0.541944	-0.336069	0.225236	1.72037	3.1677	1.32883	-1.24319	1.06492	1.15848	-0.391836	0.316273	0.473682	-1.5834	-0.394572	0.0794773	0.44025	0.278881	-0.809146	-0.992603	-0.493099
a07dbd6b81597b810de81ac0ad6caf26	-0.241728	-0.241728	-0.241728	-0.241728	-0.241728	-0.241728	-0.241728	-0.241728	-0.241728	-0.241728	-0.241728	-0.241728	-0.241728	-0.241728	-0.241728	-0.241728	-0.241728	-0.241728	-0.241728	-0.235389	-0.241728	-0.235658	2.68343	-0.241728	-0.241728	-0.240147	-0.241728	-0.241728	-0.241728	-0.241728	-0.241065	4.7953	-0.241549
ee0cbf5dda05dd1c396eed829cd82b77	0.210738	0.196549	-0.908541	-0.885602	-0.864431	0.90813	1.19941	-0.57938	-0.471293	-0.578208	0.0131754	-0.405049	-1.30374	-0.541944	-0.336069	0.225236	1.72037	3.1677	1.32883	-1.24319	1.06492	1.15848	-0.391836	0.316273	0.473682	-1.5834	-0.394572	0.0794773	0.44025	0.278881	-0.809146	-0.992603	-0.493099
715a5706f5ea5356f6c4772dc98d6430	-0.227317	-0.227317	5.19471	-0.226481	-0.227317	-0.227256	-0.227317	-0.226304	-0.226734	-0.225911	-0.227317	-0.227317	-0.227317	-0.227065	1.84796	-0.227317	-0.227317	-0.227317	-0.227317	-0.227317	-0.227317	-0.227317	-0.227317	-0.227317	-0.227317	-0.227317	-0.227317	-0.227317	-0.227317	-0.227317	-0.227317	-0.227317	-0.227317
39f3508b5bae8a765f9c99f30699feca	-0.174221	-0.174221	-0.174221	-0.174221	-0.174221	-0.174221	-0.174221	-0.174221	-0.174221	-0.174221	-0.174221	-0.174221	-0.174221	-0.174221	-0.174221	-0.174221	-0.174221	-0.174221	-0.174221	-0.172497	-0.174221	-0.172593	-0.173779	5.57048	-0.174221	-0.173798	-0.174221	-0.174221	-0.174221	-0.174221	-0.174044	-0.174086	-0.174173
870360668c3977200e9e3c9e18f79721	-0.309826	-0.309826	-0.309826	-0.309826	-0.309826	-0.309826	-0.309826	-0.309826	-0.309826	-0.309826	-0.309826	-0.309826	-0.309826	-0.309826	-0.309826	-0.309826	-0.309826	-0.309826	-0.309826	-0.306188	-0.309826	-0.3064	-0.308898	-0.309826	-0.309826	-0.308937	3.42339	-0.309826	-0.309826	-0.309826	-0.309455	3.26575	2.59638
2747bd94a19fbfa82f1e90e326d2f100	-0.250736	-0.250736	-0.250736	-0.250736	-0.250736	-0.250736	-0.250736	-0.250736	-0.250736	-0.250736	-0.250736	-0.250736	-0.250736	-0.250736	-0.250736	-0.250736	-0.250736	-0.250736	-0.250736	-0.24272	-0.250736	-0.243032	-0.248632	-0.250736	-0.250736	3.92142	-0.250736	-0.250736	-0.250736	3.83186	-0.249893	-0.250091	-0.250509
7a6a394fe7285b50ee54b56f316a3944	0.210738	0.196549	-0.908541	-0.885602	-0.864431	0.90813	1.19941	-0.57938	-0.471293	-0.578208	0.0131754	-0.405049	-1.30374	-0.541944	-0.336069	0.225236	1.72037	3.1677	1.32883	-1.24319	1.06492	1.15848	-0.391836	0.316273	0.473682	-1.5834	-0.394572	0.0794773	0.44025	0.278881	-0.809146	-0.992603	-0.493099
b310236a69032ef47e5c274f5256115a	-0.224815	-0.224815	-0.224207	-0.224032	-0.224815	-0.224758	-0.224815	-0.223866	5.24009	-0.223498	-0.224815	-0.224815	-0.224815	-0.224579	1.72523	-0.224815	-0.224815	-0.224815	-0.224815	-0.224815	-0.224815	-0.224815	-0.224815	-0.224815	-0.224815	-0.224815	-0.224815	-0.224815	-0.224815	-0.224815	-0.224815	-0.224815	-0.224815
af26ba64d6f2fab3985dbc4fb2a8241f	0.210738	0.196549	-0.908541	-0.885602	-0.864431	0.90813	1.19941	-0.57938	-0.471293	-0.578208	0.0131754	-0.405049	-1.30374	-0.541944	-0.336069	0.225236	1.72037	3.1677	1.32883	-1.24319	1.06492	1.15848	-0.391836	0.316273	0.473682	-1.5834	-0.394572	0.0794773	0.44025	0.278881	-0.809146	-0.992603	-0.493099
c5ea6cd89423d721b5558072b4d30168	5.57048	-0.174192	-0.173707	-0.173568	-0.174192	-0.174147	-0.174192	-0.173435	-0.173756	-0.173142	-0.174192	-0.174192	-0.174192	-0.174004	-0.174107	-0.174192	-0.174192	-0.174192	-0.174192	-0.174192	-0.174192	-0.174192	-0.174192	-0.174192	-0.174192	-0.174192	-0.174192	-0.174192	-0.174192	-0.174192	-0.174192	-0.174192	-0.174192
68252dd090f920d475b31fc0a5541c5c	-0.25706	-0.25706	-0.256354	-0.25615	-0.25706	-0.256994	-0.25706	-0.255957	-0.256425	4.75869	-0.25706	-0.25706	0.245066	2.70449	-0.256936	-0.25706	-0.25706	-0.25706	-0.25706	-0.25706	-0.25706	-0.25706	-0.25706	-0.25706	-0.25706	-0.25706	-0.25706	-0.25706	-0.25706	-0.25706	-0.25706	-0.25706	-0.25706
c8738b09261f9ea1f3414e16667fac02	0.210738	0.196549	-0.908541	-0.885602	-0.864431	0.90813	1.19941	-0.57938	-0.471293	-0.578208	0.0131754	-0.405049	-1.30374	-0.541944	-0.336069	0.225236	1.72037	3.1677	1.32883	-1.24319	1.06492	1.15848	-0.391836	0.316273	0.473682	-1.5834	-0.394572	0.0794773	0.44025	0.278881	-0.809146	-0.992603	-0.493099
168e15c6144f4df6ed31083c220905b0	0.210738	0.196549	-0.908541	-0.885602	-0.864431	0.90813	1.19941	-0.57938	-0.471293	-0.578208	0.0131754	-0.405049	-1.30374	-0.541944	-0.336069	0.225236	1.72037	3.1677	1.32883	-1.24319	1.06492	1.15848	-0.391836	0.316273	0.473682	-1.5834	-0.394572	0.0794773	0.44025	0.278881	-0.809146	-0.992603	-0.493099
f0f49cfc0e017d94d79c5343ebb84b57	-0.174472	-0.174472	-0.174472	-0.174472	-0.174472	-0.174472	-0.174472	-0.174472	-0.174472	-0.174472	-0.174472	-0.174472	-0.174472	-0.174472	-0.174472	5.57048	-0.174472	-0.174472	-0.174472	-0.169814	-0.174472	-0.169947	-0.17323	-0.174472	-0.174472	-0.17329	-0.174472	-0.174472	-0.174472	-0.174472	-0.173974	-0.17409	-0.174337
88e2cc3c7ae430fd82f841fcac6d761d	-0.200448	-0.200448	-0.200448	-0.200448	-0.200448	-0.200448	-0.200448	-0.200448	-0.200448	-0.200448	-0.200448	-0.200448	-0.200448	-0.200448	-0.200448	-0.200448	-0.200448	-0.200448	-0.200448	-0.19868	5.50034	-0.198779	-0.199995	-0.200448	-0.200448	-0.200014	-0.200448	-0.200448	-0.200448	-0.200448	-0.200267	-0.20031	0.708904
d9374dca5cde3bdf56ac82fa527976be	-0.17428	-0.17428	-0.17428	-0.17428	-0.17428	-0.17428	-0.17428	-0.17428	-0.17428	-0.17428	-0.17428	-0.17428	-0.17428	-0.17428	-0.17428	-0.17428	-0.17428	-0.17428	-0.17428	-0.171763	-0.17428	-0.171907	-0.173637	-0.17428	-0.17428	-0.173664	-0.17428	-0.17428	-0.17428	-0.17428	-0.174023	5.57048	-0.174211
2bfd220284f4208a729f67f3f6f073c3	0.210738	0.196549	-0.908541	-0.885602	-0.864431	0.90813	1.19941	-0.57938	-0.471293	-0.578208	0.0131754	-0.405049	-1.30374	-0.541944	-0.336069	0.225236	1.72037	3.1677	1.32883	-1.24319	1.06492	1.15848	-0.391836	0.316273	0.473682	-1.5834	-0.394572	0.0794773	0.44025	0.278881	-0.809146	-0.992603	-0.493099
591e0bc14cb4e16f197d218b3021a5d2	0.210738	0.196549	-0.908541	-0.885602	-0.864431	0.90813	1.19941	-0.57938	-0.471293	-0.578208	0.0131754	-0.405049	-1.30374	-0.541944	-0.336069	0.225236	1.72037	3.1677	1.32883	-1.24319	1.06492	1.15848	-0.391836	0.316273	0.473682	-1.5834	-0.394572	0.0794773	0.44025	0.278881	-0.809146	-0.992603	-0.493099
b6c5f02e95eff5554988164b5a87e5ce	-0.175312	-0.175312	-0.170025	-0.168592	-0.175312	-0.174795	-0.175312	-0.167199	-0.170502	-0.164326	5.57046	-0.175312	-0.175312	-0.173193	-0.174344	-0.175312	-0.175312	-0.175312	-0.175312	-0.175312	-0.175312	-0.175312	-0.175312	-0.175312	-0.175312	-0.175312	-0.175312	-0.175312	-0.175312	-0.175312	-0.175312	-0.175312	-0.175312
b2de7f61a39f051d643c50d653a6fd07	-0.250324	-0.250324	-0.249355	1.1581	5.25439	-0.250233	-0.250324	-0.248813	-0.249453	-0.248229	-0.250324	-0.250324	-0.250324	-0.249948	-0.250153	-0.250324	-0.250324	-0.250324	-0.250324	-0.248053	-0.250324	-0.247986	-0.249665	-0.250324	1.08471	-0.249705	-0.250324	-0.250324	-0.250324	-0.250324	-0.250056	-0.250119	-0.250251
3f34184c1120683e594726e1d950a71f	0.210738	0.196549	-0.908541	-0.885602	-0.864431	0.90813	1.19941	-0.57938	-0.471293	-0.578208	0.0131754	-0.405049	-1.30374	-0.541944	-0.336069	0.225236	1.72037	3.1677	1.32883	-1.24319	1.06492	1.15848	-0.391836	0.316273	0.473682	-1.5834	-0.394572	0.0794773	0.44025	0.278881	-0.809146	-0.992603	-0.493099
ccef1ba90f0bd209d05f65ac396f2bc6	-0.214989	-0.214989	5.38057	-0.212871	1.27328	-0.214834	-0.214989	-0.212423	-0.213506	-0.211439	-0.214989	-0.214989	-0.214989	-0.214347	-0.214698	-0.214989	-0.214989	-0.214989	-0.214989	-0.214989	-0.214989	-0.214989	-0.214989	-0.214989	-0.214989	-0.214989	-0.214989	-0.214989	-0.214989	-0.214989	-0.214989	-0.214989	-0.214989
11dc5cbf6e90148bd7ef831dacdb2acf	-0.174468	-0.174468	-0.172788	-0.172315	-0.174468	5.57048	-0.174468	-0.171862	-0.17295	-0.170888	-0.174468	-0.174468	-0.174468	-0.173808	-0.174168	-0.174468	-0.174468	-0.174468	-0.174468	-0.174468	-0.174468	-0.174468	-0.174468	-0.174468	-0.174468	-0.174468	-0.174468	-0.174468	-0.174468	-0.174468	-0.174468	-0.174468	-0.174468
fb3376cd5dd7b9f4c866e17253a3e5db	-0.174385	-0.174385	-0.174385	-0.174385	-0.174385	-0.174385	-0.174385	-0.174385	-0.174385	-0.174385	-0.174385	-0.174385	-0.174385	-0.174385	-0.174385	-0.174385	-0.174385	-0.174385	-0.174385	-0.170726	-0.174385	-0.170863	-0.173422	5.57048	-0.174385	-0.173467	-0.174385	-0.174385	-0.174385	-0.174385	-0.173999	-0.17409	-0.174281
c19c906ba229e4d72bd09632ac4b6a9a	0.210738	0.196549	-0.908541	-0.885602	-0.864431	0.90813	1.19941	-0.57938	-0.471293	-0.578208	0.0131754	-0.405049	-1.30374	-0.541944	-0.336069	0.225236	1.72037	3.1677	1.32883	-1.24319	1.06492	1.15848	-0.391836	0.316273	0.473682	-1.5834	-0.394572	0.0794773	0.44025	0.278881	-0.809146	-0.992603	-0.493099
a92f4a553501103ffc108daf4c248191	-0.174376	-0.174376	-0.174376	-0.174376	-0.174376	-0.174376	-0.174376	-0.174376	-0.174376	-0.174376	-0.174376	-0.174376	-0.174376	-0.174376	-0.174376	5.57048	-0.174376	-0.174376	-0.174376	-0.170821	-0.174376	-0.170961	-0.173443	-0.174376	-0.174376	-0.173486	-0.174376	-0.174376	-0.174376	-0.174376	-0.174002	-0.17409	-0.174275
4afbf45f017f69e11e9987ce9b6181c6	0.210738	0.196549	-0.908541	-0.885602	-0.864431	0.90813	1.19941	-0.57938	-0.471293	-0.578208	0.0131754	-0.405049	-1.30374	-0.541944	-0.336069	0.225236	1.72037	3.1677	1.32883	-1.24319	1.06492	1.15848	-0.391836	0.316273	0.473682	-1.5834	-0.394572	0.0794773	0.44025	0.278881	-0.809146	-0.992603	-0.493099
621c47eba23ae9c542cbea58e92ff9b2	0.210738	0.196549	-0.908541	-0.885602	-0.864431	0.90813	1.19941	-0.57938	-0.471293	-0.578208	0.0131754	-0.405049	-1.30374	-0.541944	-0.336069	0.225236	1.72037	3.1677	1.32883	-1.24319	1.06492	1.15848	-0.391836	0.316273	0.473682	-1.5834	-0.394572	0.0794773	0.44025	0.278881	-0.809146	-0.992603	-0.493099
b3b9843bbbe0fbf712a588255088fd4c	0.210738	0.196549	-0.908541	-0.885602	-0.864431	0.90813	1.19941	-0.57938	-0.471293	-0.578208	0.0131754	-0.405049	-1.30374	-0.541944	-0.336069	0.225236	1.72037	3.1677	1.32883	-1.24319	1.06492	1.15848	-0.391836	0.316273	0.473682	-1.5834	-0.394572	0.0794773	0.44025	0.278881	-0.809146	-0.992603	-0.493099
5999c79b4a0c61c19a9cf4cc497f1514	0.210738	0.196549	-0.908541	-0.885602	-0.864431	0.90813	1.19941	-0.57938	-0.471293	-0.578208	0.0131754	-0.405049	-1.30374	-0.541944	-0.336069	0.225236	1.72037	3.1677	1.32883	-1.24319	1.06492	1.15848	-0.391836	0.316273	0.473682	-1.5834	-0.394572	0.0794773	0.44025	0.278881	-0.809146	-0.992603	-0.493099
8c65d91e013525d1c8606fab40e0a88b	3.36071	-0.248514	-0.247469	-0.24717	-0.248514	-0.248416	4.33532	-0.246885	-0.247573	-0.24626	-0.248514	-0.248514	-0.248514	-0.248107	-0.24833	-0.248514	-0.248514	-0.248514	-0.248514	-0.248514	-0.248514	-0.248514	-0.248514	-0.248514	-0.248514	-0.248514	-0.248514	-0.248514	-0.248514	-0.248514	-0.248514	-0.248514	-0.248514
f19611140d118d5020d742ff315e4397	-0.250353	-0.250353	-0.248765	-0.248311	-0.250353	-0.250204	-0.250353	-0.247879	3.87248	3.8813	-0.250353	-0.250353	-0.250353	-0.249734	-0.250073	-0.250353	-0.250353	-0.250353	-0.250353	-0.250353	-0.250353	-0.250353	-0.250353	-0.250353	-0.250353	-0.250353	-0.250353	-0.250353	-0.250353	-0.250353	-0.250353	-0.250353	-0.250353
601101d33cdf43a40bd674a50711af52	-0.215435	-0.215435	-0.214948	-0.21481	-0.215435	-0.215389	-0.215435	-0.214678	-0.214996	-0.214391	-0.215435	-0.215435	-0.215435	1.29539	-0.215349	-0.215435	-0.215435	5.37465	-0.215435	-0.213585	-0.215435	-0.213658	-0.21495	-0.215435	-0.215435	-0.214972	-0.215435	-0.215435	-0.215435	-0.215435	-0.215241	-0.215286	-0.215383
138e5b1843a98150acd5bdc436c26980	-0.174317	-0.174317	-0.174317	-0.174317	-0.174317	-0.174317	-0.174317	-0.174317	-0.174317	-0.174317	-0.174317	-0.174317	-0.174317	-0.174317	-0.174317	-0.174317	-0.174317	-0.174317	-0.174317	-0.171349	-0.174317	-0.171512	-0.173556	-0.174317	-0.174317	-0.173588	-0.174317	-0.174317	-0.174317	-0.174317	-0.174013	5.57048	-0.174235
3857abee7cf8afa0371da7cd837bdc47	0.210738	0.196549	-0.908541	-0.885602	-0.864431	0.90813	1.19941	-0.57938	-0.471293	-0.578208	0.0131754	-0.405049	-1.30374	-0.541944	-0.336069	0.225236	1.72037	3.1677	1.32883	-1.24319	1.06492	1.15848	-0.391836	0.316273	0.473682	-1.5834	-0.394572	0.0794773	0.44025	0.278881	-0.809146	-0.992603	-0.493099
f293a879a98fe3b07b716d96b4449827	-0.245645	-0.245645	-0.245645	-0.245645	-0.245645	-0.245645	-0.245645	-0.245645	-0.245645	-0.245645	-0.245645	-0.245645	-0.245645	-0.245645	-0.245645	-0.245645	-0.245645	-0.245645	-0.245645	-0.241316	-0.245645	-0.241552	-0.244534	-0.245645	-0.245645	3.02128	4.58327	-0.245645	-0.245645	-0.245645	-0.245201	-0.245305	-0.245525
37a0a427f45ea3b8299b4a41c10d02e6	-0.174324	-0.174324	-0.174324	-0.174324	-0.174324	-0.174324	-0.174324	-0.174324	-0.174324	-0.174324	-0.174324	-0.174324	-0.174324	-0.174324	-0.174324	-0.174324	-0.174324	-0.174324	-0.174324	-0.171266	-0.174324	-0.171431	-0.173539	-0.174324	-0.174324	-0.173572	-0.174324	-0.174324	-0.174324	-0.174324	-0.17401	5.57048	-0.17424
2cb9d327a68b996786813f0f2c1811c4	0.210738	0.196549	-0.908541	-0.885602	-0.864431	0.90813	1.19941	-0.57938	-0.471293	-0.578208	0.0131754	-0.405049	-1.30374	-0.541944	-0.336069	0.225236	1.72037	3.1677	1.32883	-1.24319	1.06492	1.15848	-0.391836	0.316273	0.473682	-1.5834	-0.394572	0.0794773	0.44025	0.278881	-0.809146	-0.992603	-0.493099
2d904743b5316716c9aa58e9e147c7fd	0.210738	0.196549	-0.908541	-0.885602	-0.864431	0.90813	1.19941	-0.57938	-0.471293	-0.578208	0.0131754	-0.405049	-1.30374	-0.541944	-0.336069	0.225236	1.72037	3.1677	1.32883	-1.24319	1.06492	1.15848	-0.391836	0.316273	0.473682	-1.5834	-0.394572	0.0794773	0.44025	0.278881	-0.809146	-0.992603	-0.493099
be3aa43db1c015630bf88961c7273719	-0.174357	-0.174357	-0.174357	-0.174357	-0.174357	-0.174357	-0.174357	-0.174357	-0.174357	-0.174357	-0.174357	-0.174357	-0.174357	-0.174357	-0.174357	-0.174357	-0.174357	-0.174357	-0.174357	-0.170646	-0.174357	-0.170855	-0.173407	-0.174357	-0.174357	5.57048	-0.174357	-0.174357	-0.174357	-0.174357	-0.173978	-0.174067	-0.174255
a966b1bdefa45573d6aec812fb89fe25	0.210738	0.196549	-0.908541	-0.885602	-0.864431	0.90813	1.19941	-0.57938	-0.471293	-0.578208	0.0131754	-0.405049	-1.30374	-0.541944	-0.336069	0.225236	1.72037	3.1677	1.32883	-1.24319	1.06492	1.15848	-0.391836	0.316273	0.473682	-1.5834	-0.394572	0.0794773	0.44025	0.278881	-0.809146	-0.992603	-0.493099
ef9fbed7d71657fefbd31b4b135fb9a4	-0.174218	-0.174218	-0.173505	5.57048	-0.174218	-0.174151	-0.174218	-0.173105	-0.173577	-0.172674	-0.174218	-0.174218	-0.174218	-0.173941	-0.174092	-0.174218	-0.174218	-0.174218	-0.174218	-0.174218	-0.174218	-0.174218	-0.174218	-0.174218	-0.174218	-0.174218	-0.174218	-0.174218	-0.174218	-0.174218	-0.174218	-0.174218	-0.174218
a852c47377398b0e55041874c9379de1	-0.174214	-0.174214	-0.17356	-0.173372	-0.174214	-0.174153	-0.174214	-0.173194	5.57048	-0.172799	-0.174214	-0.174214	-0.174214	-0.17396	-0.174099	-0.174214	-0.174214	-0.174214	-0.174214	-0.174214	-0.174214	-0.174214	-0.174214	-0.174214	-0.174214	-0.174214	-0.174214	-0.174214	-0.174214	-0.174214	-0.174214	-0.174214	-0.174214
2504f5cc45cc7487136b0513ac32d94a	-0.174527	-0.174527	-0.174527	-0.174527	-0.174527	-0.174527	-0.174527	-0.174527	-0.174527	-0.174527	-0.174527	-0.174527	-0.174527	-0.174527	-0.174527	-0.174527	-0.174527	-0.174527	-0.174527	-0.169258	-0.174527	-0.16936	-0.173103	-0.174527	-0.174527	-0.173174	-0.174527	-0.174527	5.57048	-0.174527	-0.173954	-0.174089	-0.174372
975d5aabbcbb53d18b84ee9a8024fcd8	0.210738	0.196549	-0.908541	-0.885602	-0.864431	0.90813	1.19941	-0.57938	-0.471293	-0.578208	0.0131754	-0.405049	-1.30374	-0.541944	-0.336069	0.225236	1.72037	3.1677	1.32883	-1.24319	1.06492	1.15848	-0.391836	0.316273	0.473682	-1.5834	-0.394572	0.0794773	0.44025	0.278881	-0.809146	-0.992603	-0.493099
eb2d0a3d13f0527fe3abdfd8568d787a	0.210738	0.196549	-0.908541	-0.885602	-0.864431	0.90813	1.19941	-0.57938	-0.471293	-0.578208	0.0131754	-0.405049	-1.30374	-0.541944	-0.336069	0.225236	1.72037	3.1677	1.32883	-1.24319	1.06492	1.15848	-0.391836	0.316273	0.473682	-1.5834	-0.394572	0.0794773	0.44025	0.278881	-0.809146	-0.992603	-0.493099
cbdc0f4fcc7b1e56aacc302c2b9b870c	-0.174305	-0.174305	-0.173342	-0.173066	5.57048	-0.174215	-0.174305	-0.172803	-0.173439	-0.172225	-0.174305	-0.174305	-0.174305	-0.173931	-0.174136	-0.174305	-0.174305	-0.174305	-0.174305	-0.174305	-0.174305	-0.174305	-0.174305	-0.174305	-0.174305	-0.174305	-0.174305	-0.174305	-0.174305	-0.174305	-0.174305	-0.174305	-0.174305
4972d09809df8afaa889c0c0c08aacc2	-0.174376	-0.174376	-0.174376	-0.174376	-0.174376	-0.174376	-0.174376	-0.174376	-0.174376	-0.174376	-0.174376	-0.174376	-0.174376	-0.174376	-0.174376	-0.174376	-0.174376	-0.174376	-0.174376	-0.17041	-0.174376	-0.170629	-0.17336	-0.174376	-0.174376	5.57048	-0.174376	-0.174376	-0.174376	-0.174376	-0.17397	-0.174066	-0.174267
3abae39e94cf51920aec2b9fb42b53a9	0.210738	0.196549	-0.908541	-0.885602	-0.864431	0.90813	1.19941	-0.57938	-0.471293	-0.578208	0.0131754	-0.405049	-1.30374	-0.541944	-0.336069	0.225236	1.72037	3.1677	1.32883	-1.24319	1.06492	1.15848	-0.391836	0.316273	0.473682	-1.5834	-0.394572	0.0794773	0.44025	0.278881	-0.809146	-0.992603	-0.493099
b92c7cfb137fee89c86d0a74209d501a	0.210738	0.196549	-0.908541	-0.885602	-0.864431	0.90813	1.19941	-0.57938	-0.471293	-0.578208	0.0131754	-0.405049	-1.30374	-0.541944	-0.336069	0.225236	1.72037	3.1677	1.32883	-1.24319	1.06492	1.15848	-0.391836	0.316273	0.473682	-1.5834	-0.394572	0.0794773	0.44025	0.278881	-0.809146	-0.992603	-0.493099
5d6d200a9ac1ce63fef95fdd57cd4039	0.210738	0.196549	-0.908541	-0.885602	-0.864431	0.90813	1.19941	-0.57938	-0.471293	-0.578208	0.0131754	-0.405049	-1.30374	-0.541944	-0.336069	0.225236	1.72037	3.1677	1.32883	-1.24319	1.06492	1.15848	-0.391836	0.316273	0.473682	-1.5834	-0.394572	0.0794773	0.44025	0.278881	-0.809146	-0.992603	-0.493099
62ae243ee000954dd16cbb9f968a1789	-0.174332	-0.174332	-0.174332	-0.174332	-0.174332	-0.174332	-0.174332	-0.174332	-0.174332	-0.174332	-0.174332	-0.174332	-0.174332	-0.174332	-0.174332	-0.174332	-0.174332	-0.174332	-0.174332	-0.171152	-0.174332	-0.171317	-0.173513	-0.174332	-0.174332	-0.173548	-0.174332	-0.174332	-0.174332	-0.174332	5.57048	-0.174081	-0.174244
7aed90fb085e16c3c98bfa68130096d0	0.210738	0.196549	-0.908541	-0.885602	-0.864431	0.90813	1.19941	-0.57938	-0.471293	-0.578208	0.0131754	-0.405049	-1.30374	-0.541944	-0.336069	0.225236	1.72037	3.1677	1.32883	-1.24319	1.06492	1.15848	-0.391836	0.316273	0.473682	-1.5834	-0.394572	0.0794773	0.44025	0.278881	-0.809146	-0.992603	-0.493099
36c15a424d4f137d2b3be97a5157848c	-0.174428	-0.174428	-0.172923	-0.172498	-0.174428	5.57048	-0.174428	-0.172092	-0.173069	-0.171215	-0.174428	-0.174428	-0.174428	-0.173837	-0.17416	-0.174428	-0.174428	-0.174428	-0.174428	-0.174428	-0.174428	-0.174428	-0.174428	-0.174428	-0.174428	-0.174428	-0.174428	-0.174428	-0.174428	-0.174428	-0.174428	-0.174428	-0.174428
0e15737671741c707e2fc53a6bf0ff68	-0.174299	-0.174299	-0.17331	-0.173027	-0.174299	-0.174207	-0.174299	-0.172757	-0.173409	-0.172165	-0.174299	-0.174299	-0.174299	5.57048	-0.174125	-0.174299	-0.174299	-0.174299	-0.174299	-0.174299	-0.174299	-0.174299	-0.174299	-0.174299	-0.174299	-0.174299	-0.174299	-0.174299	-0.174299	-0.174299	-0.174299	-0.174299	-0.174299
f9179900125d1297e45dfafee20029e8	-0.174529	-0.174529	-0.174529	-0.174529	-0.174529	-0.174529	-0.174529	-0.174529	-0.174529	-0.174529	-0.174529	-0.174529	-0.174529	-0.174529	-0.174529	-0.174529	-0.174529	-0.174529	-0.174529	-0.169271	5.57048	-0.169323	-0.173088	-0.174529	-0.174529	-0.173163	-0.174529	-0.174529	-0.174529	-0.174529	-0.173949	-0.174085	-0.174372
2cc48a1933a671b087ef58c7b186d55f	-0.174433	-0.174433	-0.174433	-0.174433	-0.174433	-0.174433	-0.174433	-0.174433	-0.174433	-0.174433	-0.174433	-0.174433	-0.174433	-0.174433	-0.174433	-0.174433	-0.174433	-0.174433	-0.174433	-0.170155	-0.174433	-0.17033	-0.173313	-0.174433	-0.174433	-0.173363	-0.174433	-0.174433	-0.174433	-0.174433	-0.173984	-0.174089	5.57048
1d1ef4cfd93e4312369311b3053b9acd	0.210738	0.196549	-0.908541	-0.885602	-0.864431	0.90813	1.19941	-0.57938	-0.471293	-0.578208	0.0131754	-0.405049	-1.30374	-0.541944	-0.336069	0.225236	1.72037	3.1677	1.32883	-1.24319	1.06492	1.15848	-0.391836	0.316273	0.473682	-1.5834	-0.394572	0.0794773	0.44025	0.278881	-0.809146	-0.992603	-0.493099
870c2e3e8ebeb830c2d64ee56078f58b	0.210738	0.196549	-0.908541	-0.885602	-0.864431	0.90813	1.19941	-0.57938	-0.471293	-0.578208	0.0131754	-0.405049	-1.30374	-0.541944	-0.336069	0.225236	1.72037	3.1677	1.32883	-1.24319	1.06492	1.15848	-0.391836	0.316273	0.473682	-1.5834	-0.394572	0.0794773	0.44025	0.278881	-0.809146	-0.992603	-0.493099
bf1050837664225effcd82c97043bb16	0.210738	0.196549	-0.908541	-0.885602	-0.864431	0.90813	1.19941	-0.57938	-0.471293	-0.578208	0.0131754	-0.405049	-1.30374	-0.541944	-0.336069	0.225236	1.72037	3.1677	1.32883	-1.24319	1.06492	1.15848	-0.391836	0.316273	0.473682	-1.5834	-0.394572	0.0794773	0.44025	0.278881	-0.809146	-0.992603	-0.493099
7fea1841eedf3c2a39675587f2b52691	0.210738	0.196549	-0.908541	-0.885602	-0.864431	0.90813	1.19941	-0.57938	-0.471293	-0.578208	0.0131754	-0.405049	-1.30374	-0.541944	-0.336069	0.225236	1.72037	3.1677	1.32883	-1.24319	1.06492	1.15848	-0.391836	0.316273	0.473682	-1.5834	-0.394572	0.0794773	0.44025	0.278881	-0.809146	-0.992603	-0.493099
a2cafeeff0065516ce0706c7aea99297	0.210738	0.196549	-0.908541	-0.885602	-0.864431	0.90813	1.19941	-0.57938	-0.471293	-0.578208	0.0131754	-0.405049	-1.30374	-0.541944	-0.336069	0.225236	1.72037	3.1677	1.32883	-1.24319	1.06492	1.15848	-0.391836	0.316273	0.473682	-1.5834	-0.394572	0.0794773	0.44025	0.278881	-0.809146	-0.992603	-0.493099
28f40d53329712ce4db640453b55ec03	-0.250357	-0.250357	-0.250357	-0.250357	-0.250357	-0.250357	-0.250357	-0.250357	-0.250357	-0.250357	-0.250357	-0.250357	-0.250357	-0.250357	-0.250357	-0.250357	-0.250357	-0.250357	-0.250357	-0.244764	-0.250357	-0.245049	-0.248914	-0.250357	-0.250357	4.03414	3.7134	-0.250357	-0.250357	-0.250357	-0.24978	-0.249916	-0.250202
e712cc5fb9e59d994d6d948fd323bf4b	0.210738	0.196549	-0.908541	-0.885602	-0.864431	0.90813	1.19941	-0.57938	-0.471293	-0.578208	0.0131754	-0.405049	-1.30374	-0.541944	-0.336069	0.225236	1.72037	3.1677	1.32883	-1.24319	1.06492	1.15848	-0.391836	0.316273	0.473682	-1.5834	-0.394572	0.0794773	0.44025	0.278881	-0.809146	-0.992603	-0.493099
c2cd6f99655915682fbe061583f8b578	0.210738	0.196549	-0.908541	-0.885602	-0.864431	0.90813	1.19941	-0.57938	-0.471293	-0.578208	0.0131754	-0.405049	-1.30374	-0.541944	-0.336069	0.225236	1.72037	3.1677	1.32883	-1.24319	1.06492	1.15848	-0.391836	0.316273	0.473682	-1.5834	-0.394572	0.0794773	0.44025	0.278881	-0.809146	-0.992603	-0.493099
7e4161552cf4b7361ff89f85623ef824	0.210738	0.196549	-0.908541	-0.885602	-0.864431	0.90813	1.19941	-0.57938	-0.471293	-0.578208	0.0131754	-0.405049	-1.30374	-0.541944	-0.336069	0.225236	1.72037	3.1677	1.32883	-1.24319	1.06492	1.15848	-0.391836	0.316273	0.473682	-1.5834	-0.394572	0.0794773	0.44025	0.278881	-0.809146	-0.992603	-0.493099
fadc3c33c9568f5fc68fb8b600a47488	0.210738	0.196549	-0.908541	-0.885602	-0.864431	0.90813	1.19941	-0.57938	-0.471293	-0.578208	0.0131754	-0.405049	-1.30374	-0.541944	-0.336069	0.225236	1.72037	3.1677	1.32883	-1.24319	1.06492	1.15848	-0.391836	0.316273	0.473682	-1.5834	-0.394572	0.0794773	0.44025	0.278881	-0.809146	-0.992603	-0.493099
a0a645b9aea648874c9c174b9dc0f0c6	-0.174213	-0.174213	-0.173639	-0.173474	-0.174213	-0.17416	5.57048	-0.173318	-0.173697	-0.172973	-0.174213	-0.174213	-0.174213	-0.17399	-0.174112	-0.174213	-0.174213	-0.174213	-0.174213	-0.174213	-0.174213	-0.174213	-0.174213	-0.174213	-0.174213	-0.174213	-0.174213	-0.174213	-0.174213	-0.174213	-0.174213	-0.174213	-0.174213
5f52cfbaaa24156ce4890b1e49443f86	-0.174254	-0.174254	-0.173356	5.57048	-0.174254	-0.17417	-0.174254	-0.172854	-0.173446	-0.172313	-0.174254	-0.174254	-0.174254	-0.173905	-0.174096	-0.174254	-0.174254	-0.174254	-0.174254	-0.174254	-0.174254	-0.174254	-0.174254	-0.174254	-0.174254	-0.174254	-0.174254	-0.174254	-0.174254	-0.174254	-0.174254	-0.174254	-0.174254
7981743db68fa04582bba9f07212e7db	0.210738	0.196549	-0.908541	-0.885602	-0.864431	0.90813	1.19941	-0.57938	-0.471293	-0.578208	0.0131754	-0.405049	-1.30374	-0.541944	-0.336069	0.225236	1.72037	3.1677	1.32883	-1.24319	1.06492	1.15848	-0.391836	0.316273	0.473682	-1.5834	-0.394572	0.0794773	0.44025	0.278881	-0.809146	-0.992603	-0.493099
d1f021eb2e803444c72c25a621768ce3	0.210738	0.196549	-0.908541	-0.885602	-0.864431	0.90813	1.19941	-0.57938	-0.471293	-0.578208	0.0131754	-0.405049	-1.30374	-0.541944	-0.336069	0.225236	1.72037	3.1677	1.32883	-1.24319	1.06492	1.15848	-0.391836	0.316273	0.473682	-1.5834	-0.394572	0.0794773	0.44025	0.278881	-0.809146	-0.992603	-0.493099
d292d06a804a30766f512339bb5194ab	0.210738	0.196549	-0.908541	-0.885602	-0.864431	0.90813	1.19941	-0.57938	-0.471293	-0.578208	0.0131754	-0.405049	-1.30374	-0.541944	-0.336069	0.225236	1.72037	3.1677	1.32883	-1.24319	1.06492	1.15848	-0.391836	0.316273	0.473682	-1.5834	-0.394572	0.0794773	0.44025	0.278881	-0.809146	-0.992603	-0.493099
927c12a91abda6c27958b4f6bf5974e8	0.210738	0.196549	-0.908541	-0.885602	-0.864431	0.90813	1.19941	-0.57938	-0.471293	-0.578208	0.0131754	-0.405049	-1.30374	-0.541944	-0.336069	0.225236	1.72037	3.1677	1.32883	-1.24319	1.06492	1.15848	-0.391836	0.316273	0.473682	-1.5834	-0.394572	0.0794773	0.44025	0.278881	-0.809146	-0.992603	-0.493099
48120f2d28136884787660eb4953652a	0.210738	0.196549	-0.908541	-0.885602	-0.864431	0.90813	1.19941	-0.57938	-0.471293	-0.578208	0.0131754	-0.405049	-1.30374	-0.541944	-0.336069	0.225236	1.72037	3.1677	1.32883	-1.24319	1.06492	1.15848	-0.391836	0.316273	0.473682	-1.5834	-0.394572	0.0794773	0.44025	0.278881	-0.809146	-0.992603	-0.493099
9f4373f8c06d8d3224c4a427ef0d8b24	0.210738	0.196549	-0.908541	-0.885602	-0.864431	0.90813	1.19941	-0.57938	-0.471293	-0.578208	0.0131754	-0.405049	-1.30374	-0.541944	-0.336069	0.225236	1.72037	3.1677	1.32883	-1.24319	1.06492	1.15848	-0.391836	0.316273	0.473682	-1.5834	-0.394572	0.0794773	0.44025	0.278881	-0.809146	-0.992603	-0.493099
e38fafccf9acf6b94169d30c7c1bca3e	0.210738	0.196549	-0.908541	-0.885602	-0.864431	0.90813	1.19941	-0.57938	-0.471293	-0.578208	0.0131754	-0.405049	-1.30374	-0.541944	-0.336069	0.225236	1.72037	3.1677	1.32883	-1.24319	1.06492	1.15848	-0.391836	0.316273	0.473682	-1.5834	-0.394572	0.0794773	0.44025	0.278881	-0.809146	-0.992603	-0.493099
04fc2a013ca103abb05f583df51dd717	3.18447	-0.247141	-0.245916	-0.245565	-0.247141	-0.247027	-0.247141	-0.245231	4.46875	-0.244497	-0.247141	-0.247141	-0.247141	-0.246665	-0.246926	-0.247141	-0.247141	-0.247141	-0.247141	-0.247141	-0.247141	-0.247141	-0.247141	-0.247141	-0.247141	-0.247141	-0.247141	-0.247141	-0.247141	-0.247141	-0.247141	-0.247141	-0.247141
617d3af4ff61eacd95d8f26ae96b7257	-0.174455	-0.174455	-0.174455	-0.174455	-0.174455	-0.174455	-0.174455	-0.174455	-0.174455	-0.174455	-0.174455	-0.174455	-0.174455	-0.174455	-0.174455	-0.174455	-0.174455	-0.174455	-0.174455	-0.169458	-0.174455	-0.169711	-0.173165	-0.174455	-0.174455	5.57048	-0.174455	-0.174455	-0.174455	-0.174455	-0.173939	-0.174061	-0.174316
6e0d2d907bbe9a89cd0c226980fff5f4	0.210738	0.196549	-0.908541	-0.885602	-0.864431	0.90813	1.19941	-0.57938	-0.471293	-0.578208	0.0131754	-0.405049	-1.30374	-0.541944	-0.336069	0.225236	1.72037	3.1677	1.32883	-1.24319	1.06492	1.15848	-0.391836	0.316273	0.473682	-1.5834	-0.394572	0.0794773	0.44025	0.278881	-0.809146	-0.992603	-0.493099
6eaa4126f1149270fce6d316338af7f1	0.210738	0.196549	-0.908541	-0.885602	-0.864431	0.90813	1.19941	-0.57938	-0.471293	-0.578208	0.0131754	-0.405049	-1.30374	-0.541944	-0.336069	0.225236	1.72037	3.1677	1.32883	-1.24319	1.06492	1.15848	-0.391836	0.316273	0.473682	-1.5834	-0.394572	0.0794773	0.44025	0.278881	-0.809146	-0.992603	-0.493099
5a3b300a6bda08a4580e96d24260bc99	0.210738	0.196549	-0.908541	-0.885602	-0.864431	0.90813	1.19941	-0.57938	-0.471293	-0.578208	0.0131754	-0.405049	-1.30374	-0.541944	-0.336069	0.225236	1.72037	3.1677	1.32883	-1.24319	1.06492	1.15848	-0.391836	0.316273	0.473682	-1.5834	-0.394572	0.0794773	0.44025	0.278881	-0.809146	-0.992603	-0.493099
df7a47202e79b632b7071c0fb5afa536	-0.272698	-0.272698	-0.271025	-0.270557	2.40519	-0.272538	-0.272698	-0.270108	-0.271185	-0.269148	-0.272698	-0.272698	-0.272698	-0.272038	-0.272398	4.80849	-0.272698	-0.272698	-0.272698	-0.266379	-0.272698	-0.266491	-0.270986	0.937406	-0.272698	-0.271072	-0.272698	-0.272698	-0.272698	-0.272698	-0.272009	-0.272171	-0.272512
f80f737063601f7f957b2581f9d5524e	-0.201421	-0.201421	-0.199905	-0.199472	-0.201421	-0.201279	-0.201421	-0.19906	-0.200055	5.49512	-0.201421	-0.201421	-0.201421	-0.20083	0.741013	-0.201421	-0.201421	-0.201421	-0.201421	-0.201421	-0.201421	-0.201421	-0.201421	-0.201421	-0.201421	-0.201421	-0.201421	-0.201421	-0.201421	-0.201421	-0.201421	-0.201421	-0.201421
282ec93dc2eaa71440c7bf5ad10ca5a5	-0.1743	-0.1743	5.57048	-0.172904	-0.1743	-0.174199	-0.1743	-0.172608	-0.173324	-0.171957	-0.1743	-0.1743	-0.1743	-0.173878	-0.174109	-0.1743	-0.1743	-0.1743	-0.1743	-0.1743	-0.1743	-0.1743	-0.1743	-0.1743	-0.1743	-0.1743	-0.1743	-0.1743	-0.1743	-0.1743	-0.1743	-0.1743	-0.1743
cd79ba6a70a2eadc9fa62c4aa54ff257	-0.174298	-0.174298	-0.174298	-0.174298	-0.174298	-0.174298	-0.174298	-0.174298	-0.174298	-0.174298	-0.174298	-0.174298	-0.174298	-0.174298	-0.174298	-0.174298	-0.174298	-0.174298	-0.174298	-0.171674	5.57048	-0.171784	-0.173612	-0.174298	-0.174298	-0.173643	-0.174298	-0.174298	-0.174298	-0.174298	-0.174023	-0.174087	-0.174224
6e5be229dd49e819c917d2ae8b72610b	0.210738	0.196549	-0.908541	-0.885602	-0.864431	0.90813	1.19941	-0.57938	-0.471293	-0.578208	0.0131754	-0.405049	-1.30374	-0.541944	-0.336069	0.225236	1.72037	3.1677	1.32883	-1.24319	1.06492	1.15848	-0.391836	0.316273	0.473682	-1.5834	-0.394572	0.0794773	0.44025	0.278881	-0.809146	-0.992603	-0.493099
32512f0513d84858036e30f9150103b1	0.210738	0.196549	-0.908541	-0.885602	-0.864431	0.90813	1.19941	-0.57938	-0.471293	-0.578208	0.0131754	-0.405049	-1.30374	-0.541944	-0.336069	0.225236	1.72037	3.1677	1.32883	-1.24319	1.06492	1.15848	-0.391836	0.316273	0.473682	-1.5834	-0.394572	0.0794773	0.44025	0.278881	-0.809146	-0.992603	-0.493099
e335f74033bc634af43ee6baa84fa247	0.210738	0.196549	-0.908541	-0.885602	-0.864431	0.90813	1.19941	-0.57938	-0.471293	-0.578208	0.0131754	-0.405049	-1.30374	-0.541944	-0.336069	0.225236	1.72037	3.1677	1.32883	-1.24319	1.06492	1.15848	-0.391836	0.316273	0.473682	-1.5834	-0.394572	0.0794773	0.44025	0.278881	-0.809146	-0.992603	-0.493099
dca5bc29c8ae92cee48c6ec73347a13b	-0.174312	-0.174312	5.57048	-0.172843	-0.174312	-0.174205	-0.174312	-0.172532	-0.173284	-0.171848	-0.174312	-0.174312	-0.174312	-0.173868	-0.174111	-0.174312	-0.174312	-0.174312	-0.174312	-0.174312	-0.174312	-0.174312	-0.174312	-0.174312	-0.174312	-0.174312	-0.174312	-0.174312	-0.174312	-0.174312	-0.174312	-0.174312	-0.174312
5f1f6453ad88dc836876671d27f97f58	-0.174574	-0.174574	-0.172033	5.57048	-0.174574	-0.174333	-0.174574	-0.170629	-0.172281	-0.169145	-0.174574	-0.174574	-0.174574	-0.173578	-0.174122	-0.174574	-0.174574	-0.174574	-0.174574	-0.174574	-0.174574	-0.174574	-0.174574	-0.174574	-0.174574	-0.174574	-0.174574	-0.174574	-0.174574	-0.174574	-0.174574	-0.174574	-0.174574
2fe93c7d6554d0f92c8b2ea2c36f2e2f	-0.174478	-0.174478	-0.172782	-0.172297	-0.174478	-0.174319	-0.174478	-0.171836	-0.172951	-0.170824	-0.174478	-0.174478	5.57048	-0.173817	-0.174179	-0.174478	-0.174478	-0.174478	-0.174478	-0.174478	-0.174478	-0.174478	-0.174478	-0.174478	-0.174478	-0.174478	-0.174478	-0.174478	-0.174478	-0.174478	-0.174478	-0.174478	-0.174478
e238c6f976254aa34d2106b20782549a	-0.249945	-0.249945	-0.249945	-0.249945	-0.249945	-0.249945	-0.249945	-0.249945	-0.249945	-0.249945	-0.249945	-0.249945	-0.249945	-0.249945	-0.249945	-0.249945	-0.249945	-0.249945	-0.249945	3.62355	-0.249945	-0.2447	-0.248518	-0.249945	-0.249945	-0.248581	4.11555	-0.249945	-0.249945	-0.249945	-0.249374	-0.249509	-0.249792
e91c619cb40c81228289adf178ee2b99	-0.243817	-0.243817	-0.243817	-0.243817	-0.243817	-0.243817	-0.243817	-0.243817	-0.243817	-0.243817	-0.243817	-0.243817	-0.243817	-0.243817	-0.243817	-0.243817	-0.243817	-0.243817	-0.243817	-0.238662	-0.243817	-0.238854	-0.24246	4.69538	-0.243817	-0.242523	-0.243817	-0.243817	-0.243817	2.84908	-0.243274	-0.243401	-0.243671
f9f1a44c550f1bf4e1814e3c92c83462	-0.174378	-0.174378	-0.174378	-0.174378	-0.174378	-0.174378	-0.174378	-0.174378	-0.174378	-0.174378	-0.174378	-0.174378	-0.174378	-0.174378	-0.174378	-0.174378	-0.174378	-0.174378	-0.174378	-0.170795	-0.174378	-0.17094	-0.173439	-0.174378	-0.174378	-0.173482	-0.174378	5.57048	-0.174378	-0.174378	-0.174002	-0.174091	-0.174277
e774282bc911c1a3ec080420be8978f2	-0.174378	-0.174378	-0.174378	-0.174378	-0.174378	-0.174378	-0.174378	-0.174378	-0.174378	-0.174378	-0.174378	-0.174378	-0.174378	-0.174378	-0.174378	-0.174378	-0.174378	-0.174378	-0.174378	-0.170795	-0.174378	-0.17094	-0.173439	-0.174378	-0.174378	-0.173482	-0.174378	5.57048	-0.174378	-0.174378	-0.174002	-0.174091	-0.174277
cf875aa5375131a1cd5c9fb01cca5f1e	-0.174471	-0.174471	-0.174471	-0.174471	-0.174471	-0.174471	-0.174471	-0.174471	-0.174471	-0.174471	-0.174471	-0.174471	-0.174471	-0.174471	-0.174471	-0.174471	-0.174471	-0.174471	-0.174471	-0.169629	-0.174471	-0.169839	-0.173208	-0.174471	-0.174471	-0.173264	-0.174471	-0.174471	-0.174471	-0.174471	-0.173965	5.57048	-0.174335
b1a9e986c2f78d9cc90b006f6f518d62	0.210738	0.196549	-0.908541	-0.885602	-0.864431	0.90813	1.19941	-0.57938	-0.471293	-0.578208	0.0131754	-0.405049	-1.30374	-0.541944	-0.336069	0.225236	1.72037	3.1677	1.32883	-1.24319	1.06492	1.15848	-0.391836	0.316273	0.473682	-1.5834	-0.394572	0.0794773	0.44025	0.278881	-0.809146	-0.992603	-0.493099
e997b84121104c0999ae87417d492b9a	0.210738	0.196549	-0.908541	-0.885602	-0.864431	0.90813	1.19941	-0.57938	-0.471293	-0.578208	0.0131754	-0.405049	-1.30374	-0.541944	-0.336069	0.225236	1.72037	3.1677	1.32883	-1.24319	1.06492	1.15848	-0.391836	0.316273	0.473682	-1.5834	-0.394572	0.0794773	0.44025	0.278881	-0.809146	-0.992603	-0.493099
d3afd2a72e2802c2cedb6df13114f976	0.210738	0.196549	-0.908541	-0.885602	-0.864431	0.90813	1.19941	-0.57938	-0.471293	-0.578208	0.0131754	-0.405049	-1.30374	-0.541944	-0.336069	0.225236	1.72037	3.1677	1.32883	-1.24319	1.06492	1.15848	-0.391836	0.316273	0.473682	-1.5834	-0.394572	0.0794773	0.44025	0.278881	-0.809146	-0.992603	-0.493099
98005329e6b42b505bd7d820ec280d8b	0.210738	0.196549	-0.908541	-0.885602	-0.864431	0.90813	1.19941	-0.57938	-0.471293	-0.578208	0.0131754	-0.405049	-1.30374	-0.541944	-0.336069	0.225236	1.72037	3.1677	1.32883	-1.24319	1.06492	1.15848	-0.391836	0.316273	0.473682	-1.5834	-0.394572	0.0794773	0.44025	0.278881	-0.809146	-0.992603	-0.493099
0647fbd07a248a73069f4c606a541fe5	0.210738	0.196549	-0.908541	-0.885602	-0.864431	0.90813	1.19941	-0.57938	-0.471293	-0.578208	0.0131754	-0.405049	-1.30374	-0.541944	-0.336069	0.225236	1.72037	3.1677	1.32883	-1.24319	1.06492	1.15848	-0.391836	0.316273	0.473682	-1.5834	-0.394572	0.0794773	0.44025	0.278881	-0.809146	-0.992603	-0.493099
721d5df1407b229122c16019796e71a5	-0.174187	-0.174187	-0.174187	-0.174187	-0.174187	-0.174187	-0.174187	-0.174187	-0.174187	-0.174187	-0.174187	-0.174187	-0.174187	-0.174187	-0.174187	-0.174187	-0.174187	-0.174187	-0.174187	-0.172142	-0.174187	5.57048	-0.173657	-0.174187	-0.174187	-0.173681	-0.174187	-0.174187	-0.174187	-0.174187	-0.173975	-0.174025	-0.17413
886820243e9f193f818f44ffafb72228	-0.174536	-0.174536	-0.174536	-0.174536	-0.174536	-0.174536	-0.174536	-0.174536	-0.174536	-0.174536	-0.174536	-0.174536	-0.174536	-0.174536	-0.174536	-0.174536	-0.174536	-0.174536	-0.174536	-0.168491	-0.174536	-0.168768	-0.172965	-0.174536	-0.174536	5.57048	-0.174536	-0.174536	-0.174536	-0.174536	-0.173907	-0.174055	-0.174366
d7c3ae890ec4975f6c3fb50e9470b940	-0.174433	-0.174433	-0.174433	-0.174433	-0.174433	-0.174433	-0.174433	-0.174433	-0.174433	-0.174433	-0.174433	-0.174433	-0.174433	-0.174433	-0.174433	-0.174433	-0.174433	-0.174433	-0.174433	-0.170155	-0.174433	-0.17033	-0.173313	-0.174433	-0.174433	-0.173363	-0.174433	-0.174433	-0.174433	-0.174433	-0.173984	-0.174089	5.57048
8508e9c3a3ee2d579b34ab097851d4c2	0.210738	0.196549	-0.908541	-0.885602	-0.864431	0.90813	1.19941	-0.57938	-0.471293	-0.578208	0.0131754	-0.405049	-1.30374	-0.541944	-0.336069	0.225236	1.72037	3.1677	1.32883	-1.24319	1.06492	1.15848	-0.391836	0.316273	0.473682	-1.5834	-0.394572	0.0794773	0.44025	0.278881	-0.809146	-0.992603	-0.493099
ff316fa5f91785b97b8a10e993cfb8e0	0.210738	0.196549	-0.908541	-0.885602	-0.864431	0.90813	1.19941	-0.57938	-0.471293	-0.578208	0.0131754	-0.405049	-1.30374	-0.541944	-0.336069	0.225236	1.72037	3.1677	1.32883	-1.24319	1.06492	1.15848	-0.391836	0.316273	0.473682	-1.5834	-0.394572	0.0794773	0.44025	0.278881	-0.809146	-0.992603	-0.493099
06f6e9cafb2386cbdd0d1fb2244e6305	0.210738	0.196549	-0.908541	-0.885602	-0.864431	0.90813	1.19941	-0.57938	-0.471293	-0.578208	0.0131754	-0.405049	-1.30374	-0.541944	-0.336069	0.225236	1.72037	3.1677	1.32883	-1.24319	1.06492	1.15848	-0.391836	0.316273	0.473682	-1.5834	-0.394572	0.0794773	0.44025	0.278881	-0.809146	-0.992603	-0.493099
922d33a2963d3e87a3d4df6b82371235	-0.247402	-0.247402	3.12188	-0.243573	-0.247402	-0.247112	-0.247402	-0.242775	-0.244679	-0.2411	-0.247402	-0.247402	-0.247402	-0.246208	-0.246858	-0.247402	-0.247402	-0.247402	-0.247402	-0.239553	-0.247402	4.51365	-0.245022	-0.247402	-0.247402	-0.245184	-0.247402	-0.247402	-0.247402	-0.247402	-0.246431	-0.246657	-0.247137
8707ff9eac05bc071993b6f346ec5baa	-0.174446	-0.174446	-0.172885	-0.17244	5.57048	-0.174299	-0.174446	-0.172016	-0.17304	-0.171088	-0.174446	-0.174446	-0.174446	-0.173837	-0.17417	-0.174446	-0.174446	-0.174446	-0.174446	-0.174446	-0.174446	-0.174446	-0.174446	-0.174446	-0.174446	-0.174446	-0.174446	-0.174446	-0.174446	-0.174446	-0.174446	-0.174446	-0.174446
2d01d21dc12ee96d173b6ab4e83f9a3b	-0.174446	-0.174446	-0.172885	-0.17244	5.57048	-0.174299	-0.174446	-0.172016	-0.17304	-0.171088	-0.174446	-0.174446	-0.174446	-0.173837	-0.17417	-0.174446	-0.174446	-0.174446	-0.174446	-0.174446	-0.174446	-0.174446	-0.174446	-0.174446	-0.174446	-0.174446	-0.174446	-0.174446	-0.174446	-0.174446	-0.174446	-0.174446	-0.174446
90efbf79b027835779101fc55504e842	-0.174446	-0.174446	-0.172885	-0.17244	5.57048	-0.174299	-0.174446	-0.172016	-0.17304	-0.171088	-0.174446	-0.174446	-0.174446	-0.173837	-0.17417	-0.174446	-0.174446	-0.174446	-0.174446	-0.174446	-0.174446	-0.174446	-0.174446	-0.174446	-0.174446	-0.174446	-0.174446	-0.174446	-0.174446	-0.174446	-0.174446	-0.174446	-0.174446
7986ebef50cc6268d450a21b9157d4c3	-0.174269	-0.174269	-0.17345	-0.173216	-0.174269	5.57048	-0.174269	-0.172993	-0.173531	-0.172505	-0.174269	-0.174269	-0.174269	-0.173949	-0.174124	-0.174269	-0.174269	-0.174269	-0.174269	-0.174269	-0.174269	-0.174269	-0.174269	-0.174269	-0.174269	-0.174269	-0.174269	-0.174269	-0.174269	-0.174269	-0.174269	-0.174269	-0.174269
4d89c52e289ffd7765ecbf867e6208f5	-0.174346	-0.174346	-0.173182	-0.17285	-0.174346	-0.174237	-0.174346	-0.172533	-0.173298	-0.171839	-0.174346	-0.174346	-0.174346	-0.173892	5.57048	-0.174346	-0.174346	-0.174346	-0.174346	-0.174346	-0.174346	-0.174346	-0.174346	-0.174346	-0.174346	-0.174346	-0.174346	-0.174346	-0.174346	-0.174346	-0.174346	-0.174346	-0.174346
d6d7bc9e140569ab63939a422ab65dd1	0.210738	0.196549	-0.908541	-0.885602	-0.864431	0.90813	1.19941	-0.57938	-0.471293	-0.578208	0.0131754	-0.405049	-1.30374	-0.541944	-0.336069	0.225236	1.72037	3.1677	1.32883	-1.24319	1.06492	1.15848	-0.391836	0.316273	0.473682	-1.5834	-0.394572	0.0794773	0.44025	0.278881	-0.809146	-0.992603	-0.493099
c7205100c08de2585db74f670a36edf9	0.210738	0.196549	-0.908541	-0.885602	-0.864431	0.90813	1.19941	-0.57938	-0.471293	-0.578208	0.0131754	-0.405049	-1.30374	-0.541944	-0.336069	0.225236	1.72037	3.1677	1.32883	-1.24319	1.06492	1.15848	-0.391836	0.316273	0.473682	-1.5834	-0.394572	0.0794773	0.44025	0.278881	-0.809146	-0.992603	-0.493099
4cca3c3fed7ee628fc7001d54a1c7209	0.210738	0.196549	-0.908541	-0.885602	-0.864431	0.90813	1.19941	-0.57938	-0.471293	-0.578208	0.0131754	-0.405049	-1.30374	-0.541944	-0.336069	0.225236	1.72037	3.1677	1.32883	-1.24319	1.06492	1.15848	-0.391836	0.316273	0.473682	-1.5834	-0.394572	0.0794773	0.44025	0.278881	-0.809146	-0.992603	-0.493099
002cd9ec484ab3bd016c693e139e18ee	-0.38697	-0.38697	-0.384902	-0.384319	-0.38697	-0.386774	-0.38697	-0.383762	-0.385102	-0.382561	-0.38697	-0.38697	-0.38697	2.32951	1.73693	-0.38697	-0.38697	-0.38697	-0.38697	-0.379668	-0.38697	3.8835	-0.384982	1.75979	-0.38697	-0.385084	-0.38697	1.09824	-0.38697	-0.38697	-0.38617	-0.386358	-0.386754
a9fa77fde69f69499b9e8a7567be8836	-0.174396	-0.174396	-0.174396	-0.174396	-0.174396	-0.174396	-0.174396	-0.174396	-0.174396	-0.174396	-0.174396	-0.174396	-0.174396	-0.174396	-0.174396	-0.174396	5.57048	-0.174396	-0.174396	-0.17065	-0.174396	-0.170734	-0.173388	-0.174396	-0.174396	-0.173438	-0.174396	-0.174396	-0.174396	-0.174396	-0.173991	-0.174086	-0.174287
75bd82a728427b9fe0161be3977a9dee	-0.174404	-0.174404	-0.174404	-0.174404	-0.174404	-0.174404	-0.174404	-0.174404	-0.174404	-0.174404	-0.174404	-0.174404	-0.174404	-0.174404	-0.174404	-0.174404	-0.174404	-0.174404	-0.174404	5.57048	-0.174404	-0.168463	-0.17278	-0.174404	-0.174404	-0.172855	-0.174404	-0.174404	-0.174404	-0.174404	-0.173753	-0.173906	-0.174228
a9241ac1841b7463ed03c02216f5e93d	0.210738	0.196549	-0.908541	-0.885602	-0.864431	0.90813	1.19941	-0.57938	-0.471293	-0.578208	0.0131754	-0.405049	-1.30374	-0.541944	-0.336069	0.225236	1.72037	3.1677	1.32883	-1.24319	1.06492	1.15848	-0.391836	0.316273	0.473682	-1.5834	-0.394572	0.0794773	0.44025	0.278881	-0.809146	-0.992603	-0.493099
dafe6190d631bddf88f41db442a220b1	0.210738	0.196549	-0.908541	-0.885602	-0.864431	0.90813	1.19941	-0.57938	-0.471293	-0.578208	0.0131754	-0.405049	-1.30374	-0.541944	-0.336069	0.225236	1.72037	3.1677	1.32883	-1.24319	1.06492	1.15848	-0.391836	0.316273	0.473682	-1.5834	-0.394572	0.0794773	0.44025	0.278881	-0.809146	-0.992603	-0.493099
7d713f58951c259d6c0f4158ce8e77e6	0.210738	0.196549	-0.908541	-0.885602	-0.864431	0.90813	1.19941	-0.57938	-0.471293	-0.578208	0.0131754	-0.405049	-1.30374	-0.541944	-0.336069	0.225236	1.72037	3.1677	1.32883	-1.24319	1.06492	1.15848	-0.391836	0.316273	0.473682	-1.5834	-0.394572	0.0794773	0.44025	0.278881	-0.809146	-0.992603	-0.493099
d7ef89fbe0b04fbcfcd1261bbba40170	-0.174385	-0.174385	-0.173012	-0.17262	-0.174385	-0.174256	-0.174385	-0.172247	-0.173148	-0.171431	-0.174385	-0.174385	-0.174385	5.57048	-0.174142	-0.174385	-0.174385	-0.174385	-0.174385	-0.174385	-0.174385	-0.174385	-0.174385	-0.174385	-0.174385	-0.174385	-0.174385	-0.174385	-0.174385	-0.174385	-0.174385	-0.174385	-0.174385
45ec8d8b3f3f833abb943a394602ca67	-0.174364	-0.174364	-0.174364	-0.174364	-0.174364	-0.174364	-0.174364	-0.174364	-0.174364	-0.174364	-0.174364	-0.174364	-0.174364	-0.174364	-0.174364	-0.174364	-0.174364	-0.174364	-0.174364	-0.170968	5.57048	-0.171079	-0.173464	-0.174364	-0.174364	-0.173507	-0.174364	-0.174364	-0.174364	-0.174364	-0.174003	-0.174088	-0.174267
264e289b9e0c6779eabf9772f7981d48	-0.174521	-0.174521	-0.174521	-0.174521	-0.174521	-0.174521	-0.174521	-0.174521	-0.174521	-0.174521	-0.174521	-0.174521	-0.174521	-0.174521	-0.174521	-0.174521	-0.174521	-0.174521	-0.174521	-0.169266	-0.174521	-0.169434	-0.173127	-0.174521	-0.174521	-0.173193	5.57048	-0.174521	-0.174521	-0.174521	-0.173962	-0.174093	-0.174371
31217980cfdf305668ba9c8482a34e81	-0.174451	-0.174451	-0.174451	-0.174451	-0.174451	-0.174451	-0.174451	-0.174451	-0.174451	-0.174451	-0.174451	-0.174451	-0.174451	-0.174451	-0.174451	-0.174451	-0.174451	-0.174451	-0.174451	-0.170023	-0.174451	-0.170168	-0.173278	-0.174451	-0.174451	-0.173333	-0.174451	5.57048	-0.174451	-0.174451	-0.173981	-0.174091	-0.174324
e5b617e2379689f07be2fbc9c491f0a8	-0.174418	-0.174418	-0.174418	-0.174418	-0.174418	-0.174418	-0.174418	-0.174418	-0.174418	-0.174418	-0.174418	-0.174418	-0.174418	-0.174418	-0.174418	-0.174418	-0.174418	-0.174418	-0.174418	-0.170389	-0.174418	-0.170518	-0.173349	-0.174418	-0.174418	-0.1734	-0.174418	-0.174418	5.57048	-0.174418	-0.173989	-0.17409	-0.174302
2f8ad4365632e4a05d8897ac4ee70b3a	-0.174464	-0.174464	-0.174464	-0.174464	-0.174464	-0.174464	-0.174464	-0.174464	-0.174464	-0.174464	-0.174464	-0.174464	-0.174464	-0.174464	-0.174464	-0.174464	-0.174464	-0.174464	-0.174464	-0.169899	-0.174464	-0.170032	-0.173248	-0.174464	-0.174464	-0.173306	-0.174464	-0.174464	-0.174464	5.57048	-0.173976	-0.17409	-0.174332
c982470b2a0c52e8606b0898f3616f42	-0.174907	-0.174907	-0.174907	-0.174907	-0.174907	-0.174907	-0.174907	-0.174907	-0.174907	-0.174907	-0.174907	-0.174907	-0.174907	-0.174907	-0.174907	-0.174907	-0.174907	-0.174907	-0.174907	-0.165226	-0.174907	-0.165213	-0.17221	-0.174907	-0.174907	-0.172357	-0.174907	-0.174907	-0.174907	-0.174907	-0.173818	-0.174073	5.57047
4963d4ed2df490e8bc8d22c472e42a12	0.210738	0.196549	-0.908541	-0.885602	-0.864431	0.90813	1.19941	-0.57938	-0.471293	-0.578208	0.0131754	-0.405049	-1.30374	-0.541944	-0.336069	0.225236	1.72037	3.1677	1.32883	-1.24319	1.06492	1.15848	-0.391836	0.316273	0.473682	-1.5834	-0.394572	0.0794773	0.44025	0.278881	-0.809146	-0.992603	-0.493099
021b898345f1a2b66c1e0da5f63a93c6	0.210738	0.196549	-0.908541	-0.885602	-0.864431	0.90813	1.19941	-0.57938	-0.471293	-0.578208	0.0131754	-0.405049	-1.30374	-0.541944	-0.336069	0.225236	1.72037	3.1677	1.32883	-1.24319	1.06492	1.15848	-0.391836	0.316273	0.473682	-1.5834	-0.394572	0.0794773	0.44025	0.278881	-0.809146	-0.992603	-0.493099
ad13382614cd54b5bfa93c7bada5cf17	0.210738	0.196549	-0.908541	-0.885602	-0.864431	0.90813	1.19941	-0.57938	-0.471293	-0.578208	0.0131754	-0.405049	-1.30374	-0.541944	-0.336069	0.225236	1.72037	3.1677	1.32883	-1.24319	1.06492	1.15848	-0.391836	0.316273	0.473682	-1.5834	-0.394572	0.0794773	0.44025	0.278881	-0.809146	-0.992603	-0.493099
fcc84f75257e928f79853e39bb2c6d23	0.210738	0.196549	-0.908541	-0.885602	-0.864431	0.90813	1.19941	-0.57938	-0.471293	-0.578208	0.0131754	-0.405049	-1.30374	-0.541944	-0.336069	0.225236	1.72037	3.1677	1.32883	-1.24319	1.06492	1.15848	-0.391836	0.316273	0.473682	-1.5834	-0.394572	0.0794773	0.44025	0.278881	-0.809146	-0.992603	-0.493099
e2994a610a5a32d42249d4c68abcdb48	-0.174308	-0.174308	-0.17332	-0.173039	-0.174308	5.57048	-0.174308	-0.172771	-0.173418	-0.172185	-0.174308	-0.174308	-0.174308	-0.173922	-0.174133	-0.174308	-0.174308	-0.174308	-0.174308	-0.174308	-0.174308	-0.174308	-0.174308	-0.174308	-0.174308	-0.174308	-0.174308	-0.174308	-0.174308	-0.174308	-0.174308	-0.174308	-0.174308
54e0174aa8565daf971f0e40d489b6c0	-0.174614	-0.174614	-0.172339	-0.171692	-0.174614	-0.1744	-0.174614	-0.171075	-0.172564	-0.169729	-0.174614	-0.174614	5.57048	-0.173726	-0.174211	-0.174614	-0.174614	-0.174614	-0.174614	-0.174614	-0.174614	-0.174614	-0.174614	-0.174614	-0.174614	-0.174614	-0.174614	-0.174614	-0.174614	-0.174614	-0.174614	-0.174614	-0.174614
c0f5347ba9bf78765148e77ea5e6da6c	-0.174472	-0.174472	-0.174472	-0.174472	-0.174472	-0.174472	-0.174472	-0.174472	-0.174472	-0.174472	-0.174472	-0.174472	-0.174472	-0.174472	-0.174472	5.57048	-0.174472	-0.174472	-0.174472	-0.169814	-0.174472	-0.169947	-0.17323	-0.174472	-0.174472	-0.17329	-0.174472	-0.174472	-0.174472	-0.174472	-0.173974	-0.17409	-0.174337
d2d480b667c0d25176b7ad8e933c0ae7	-0.174958	-0.174958	-0.174958	-0.174958	-0.174958	-0.174958	-0.174958	-0.174958	-0.174958	-0.174958	-0.174958	-0.174958	-0.174958	-0.174958	-0.174958	-0.174958	-0.174958	-0.174958	-0.174958	-0.163539	-0.174958	-0.16378	-0.171879	-0.174958	-0.174958	5.57046	-0.174958	-0.174958	-0.174958	-0.174958	-0.173721	-0.174011	-0.174624
f7a5bb26f18474e6c701f3da11ad9e22	-0.175345	-0.175345	-0.175345	-0.175345	-0.175345	-0.175345	-0.175345	-0.175345	-0.175345	-0.175345	-0.175345	-0.175345	-0.175345	-0.175345	-0.175345	-0.175345	-0.175345	-0.175345	-0.175345	-0.15917	-0.175345	-0.159134	-0.170833	-0.175345	-0.175345	5.57044	-0.175345	-0.175345	-0.175345	-0.175345	-0.173524	-0.17395	-0.174852
8cadcb7be6a644953d0ce8e8118a49d3	0.210738	0.196549	-0.908541	-0.885602	-0.864431	0.90813	1.19941	-0.57938	-0.471293	-0.578208	0.0131754	-0.405049	-1.30374	-0.541944	-0.336069	0.225236	1.72037	3.1677	1.32883	-1.24319	1.06492	1.15848	-0.391836	0.316273	0.473682	-1.5834	-0.394572	0.0794773	0.44025	0.278881	-0.809146	-0.992603	-0.493099
8e74f6f63a5f9a304aeb8284be71fd23	0.210738	0.196549	-0.908541	-0.885602	-0.864431	0.90813	1.19941	-0.57938	-0.471293	-0.578208	0.0131754	-0.405049	-1.30374	-0.541944	-0.336069	0.225236	1.72037	3.1677	1.32883	-1.24319	1.06492	1.15848	-0.391836	0.316273	0.473682	-1.5834	-0.394572	0.0794773	0.44025	0.278881	-0.809146	-0.992603	-0.493099
828956a5e920010c494db3c02fa609c3	0.210738	0.196549	-0.908541	-0.885602	-0.864431	0.90813	1.19941	-0.57938	-0.471293	-0.578208	0.0131754	-0.405049	-1.30374	-0.541944	-0.336069	0.225236	1.72037	3.1677	1.32883	-1.24319	1.06492	1.15848	-0.391836	0.316273	0.473682	-1.5834	-0.394572	0.0794773	0.44025	0.278881	-0.809146	-0.992603	-0.493099
23194d2b7c5d9dadd6ac2f254c6586d1	0.210738	0.196549	-0.908541	-0.885602	-0.864431	0.90813	1.19941	-0.57938	-0.471293	-0.578208	0.0131754	-0.405049	-1.30374	-0.541944	-0.336069	0.225236	1.72037	3.1677	1.32883	-1.24319	1.06492	1.15848	-0.391836	0.316273	0.473682	-1.5834	-0.394572	0.0794773	0.44025	0.278881	-0.809146	-0.992603	-0.493099
aa19b65fa066defdc12ae4b7f2f00066	0.210738	0.196549	-0.908541	-0.885602	-0.864431	0.90813	1.19941	-0.57938	-0.471293	-0.578208	0.0131754	-0.405049	-1.30374	-0.541944	-0.336069	0.225236	1.72037	3.1677	1.32883	-1.24319	1.06492	1.15848	-0.391836	0.316273	0.473682	-1.5834	-0.394572	0.0794773	0.44025	0.278881	-0.809146	-0.992603	-0.493099
cf3739440e97870cb08e8bae2d3d9a16	-0.174533	-0.174533	-0.1726	-0.172055	-0.174533	-0.17435	-0.174533	-0.171533	-0.172789	-0.170405	5.57048	-0.174533	-0.174533	-0.173775	-0.174189	-0.174533	-0.174533	-0.174533	-0.174533	-0.174533	-0.174533	-0.174533	-0.174533	-0.174533	-0.174533	-0.174533	-0.174533	-0.174533	-0.174533	-0.174533	-0.174533	-0.174533	-0.174533
b454c56ae7923cac07b03196d8b77304	-0.174653	-0.174653	-0.172212	-0.171518	-0.174653	-0.174423	-0.174653	-0.170857	-0.172453	-0.169415	-0.174653	-0.174653	5.57048	-0.173699	-0.174221	-0.174653	-0.174653	-0.174653	-0.174653	-0.174653	-0.174653	-0.174653	-0.174653	-0.174653	-0.174653	-0.174653	-0.174653	-0.174653	-0.174653	-0.174653	-0.174653	-0.174653	-0.174653
a75889212ce7bdd5044cac71248d0f91	-0.175613	-0.175613	-0.175613	-0.175613	-0.175613	-0.175613	-0.175613	-0.175613	-0.175613	-0.175613	-0.175613	-0.175613	-0.175613	-0.175613	-0.175613	-0.175613	-0.175613	-0.175613	-0.175613	-0.157838	-0.175613	-0.157092	-0.170362	-0.175613	-0.175613	-0.170697	-0.175613	-0.175613	-0.175613	-0.175613	-0.173477	5.57043	-0.175031
f32e2b5a7a86a1e46b785c45022a6e5f	0.210738	0.196549	-0.908541	-0.885602	-0.864431	0.90813	1.19941	-0.57938	-0.471293	-0.578208	0.0131754	-0.405049	-1.30374	-0.541944	-0.336069	0.225236	1.72037	3.1677	1.32883	-1.24319	1.06492	1.15848	-0.391836	0.316273	0.473682	-1.5834	-0.394572	0.0794773	0.44025	0.278881	-0.809146	-0.992603	-0.493099
cd8d2ddb88bbe44dfa61a34dfd244b0b	-0.250292	-0.250292	-0.247586	-0.246818	3.62361	-0.250036	-0.250292	-0.246085	-0.247852	-0.244491	-0.250292	-0.250292	-0.250292	-0.249234	4.1155	-0.250292	-0.250292	-0.250292	-0.250292	-0.250292	-0.250292	-0.250292	-0.250292	-0.250292	-0.250292	-0.250292	-0.250292	-0.250292	-0.250292	-0.250292	-0.250292	-0.250292	-0.250292
f5a5907f7e429d22c8dfc25f7001fe70	-0.174341	-0.174341	-0.173223	-0.172905	-0.174341	-0.174236	5.57048	-0.172602	-0.173333	-0.171944	-0.174341	-0.174341	-0.174341	-0.173904	-0.174143	-0.174341	-0.174341	-0.174341	-0.174341	-0.174341	-0.174341	-0.174341	-0.174341	-0.174341	-0.174341	-0.174341	-0.174341	-0.174341	-0.174341	-0.174341	-0.174341	-0.174341	-0.174341
945184b6386c192c0066e0a98a154780	-0.174486	-0.174486	-0.174486	-0.174486	-0.174486	-0.174486	-0.174486	-0.174486	-0.174486	-0.174486	-0.174486	-0.174486	-0.174486	-0.174486	-0.174486	-0.174486	-0.174486	-0.174486	-0.174486	-0.169122	-0.174486	-0.169287	5.57048	-0.174486	-0.174486	-0.173128	-0.174486	-0.174486	-0.174486	-0.174486	-0.173914	-0.174049	-0.174332
6b6e21f54d4fd2ef6ccb59bcab293951	-0.174486	-0.174486	-0.174486	-0.174486	-0.174486	-0.174486	-0.174486	-0.174486	-0.174486	-0.174486	-0.174486	-0.174486	-0.174486	-0.174486	-0.174486	-0.174486	-0.174486	-0.174486	-0.174486	-0.169122	-0.174486	-0.169287	5.57048	-0.174486	-0.174486	-0.173128	-0.174486	-0.174486	-0.174486	-0.174486	-0.173914	-0.174049	-0.174332
ef7a59a2c2a260e03e8e6df36b757be8	0.210738	0.196549	-0.908541	-0.885602	-0.864431	0.90813	1.19941	-0.57938	-0.471293	-0.578208	0.0131754	-0.405049	-1.30374	-0.541944	-0.336069	0.225236	1.72037	3.1677	1.32883	-1.24319	1.06492	1.15848	-0.391836	0.316273	0.473682	-1.5834	-0.394572	0.0794773	0.44025	0.278881	-0.809146	-0.992603	-0.493099
b6a66219872cf67ce4a39aa5c02b972f	0.210738	0.196549	-0.908541	-0.885602	-0.864431	0.90813	1.19941	-0.57938	-0.471293	-0.578208	0.0131754	-0.405049	-1.30374	-0.541944	-0.336069	0.225236	1.72037	3.1677	1.32883	-1.24319	1.06492	1.15848	-0.391836	0.316273	0.473682	-1.5834	-0.394572	0.0794773	0.44025	0.278881	-0.809146	-0.992603	-0.493099
8f688d262ead4266b13827f5099d967d	0.210738	0.196549	-0.908541	-0.885602	-0.864431	0.90813	1.19941	-0.57938	-0.471293	-0.578208	0.0131754	-0.405049	-1.30374	-0.541944	-0.336069	0.225236	1.72037	3.1677	1.32883	-1.24319	1.06492	1.15848	-0.391836	0.316273	0.473682	-1.5834	-0.394572	0.0794773	0.44025	0.278881	-0.809146	-0.992603	-0.493099
dc6238760f7fb47db3501252a3751840	0.210738	0.196549	-0.908541	-0.885602	-0.864431	0.90813	1.19941	-0.57938	-0.471293	-0.578208	0.0131754	-0.405049	-1.30374	-0.541944	-0.336069	0.225236	1.72037	3.1677	1.32883	-1.24319	1.06492	1.15848	-0.391836	0.316273	0.473682	-1.5834	-0.394572	0.0794773	0.44025	0.278881	-0.809146	-0.992603	-0.493099
434844bd94944aeac48633e9ac725097	-0.174492	-0.174492	-0.172639	-0.172114	-0.174492	-0.174317	-0.174492	-0.171612	-0.172821	-0.170521	-0.174492	-0.174492	-0.174492	5.57048	-0.174163	-0.174492	-0.174492	-0.174492	-0.174492	-0.174492	-0.174492	-0.174492	-0.174492	-0.174492	-0.174492	-0.174492	-0.174492	-0.174492	-0.174492	-0.174492	-0.174492	-0.174492	-0.174492
bfa3561ca0d31bca54be08e2d9f7937f	-0.17473	-0.17473	-0.17473	-0.17473	-0.17473	-0.17473	-0.17473	-0.17473	-0.17473	-0.17473	-0.17473	-0.17473	-0.17473	-0.17473	-0.17473	-0.17473	-0.17473	-0.17473	-0.17473	-0.16681	-0.17473	-0.167001	-0.172604	-0.17473	-0.17473	-0.172709	-0.17473	-0.17473	-0.17473	-0.17473	-0.173876	5.57047	-0.174499
6b58eab3efa3d8fc502c99815d19e932	-0.174636	-0.174636	-0.174636	-0.174636	-0.174636	-0.174636	-0.174636	-0.174636	-0.174636	-0.174636	-0.174636	-0.174636	-0.174636	-0.174636	-0.174636	-0.174636	-0.174636	-0.174636	-0.174636	-0.168002	-0.174636	-0.168153	-0.172852	-0.174636	-0.174636	-0.17294	-0.174636	-0.174636	-0.174636	-0.174636	-0.173919	-0.174087	5.57048
3a563acdbc1eb7299e21480164c40a3e	0.210738	0.196549	-0.908541	-0.885602	-0.864431	0.90813	1.19941	-0.57938	-0.471293	-0.578208	0.0131754	-0.405049	-1.30374	-0.541944	-0.336069	0.225236	1.72037	3.1677	1.32883	-1.24319	1.06492	1.15848	-0.391836	0.316273	0.473682	-1.5834	-0.394572	0.0794773	0.44025	0.278881	-0.809146	-0.992603	-0.493099
d9747990e7cb0898a3af5e27277b4ca4	0.210738	0.196549	-0.908541	-0.885602	-0.864431	0.90813	1.19941	-0.57938	-0.471293	-0.578208	0.0131754	-0.405049	-1.30374	-0.541944	-0.336069	0.225236	1.72037	3.1677	1.32883	-1.24319	1.06492	1.15848	-0.391836	0.316273	0.473682	-1.5834	-0.394572	0.0794773	0.44025	0.278881	-0.809146	-0.992603	-0.493099
8aeb82845cf39311d0c9a6a82b39a131	0.210738	0.196549	-0.908541	-0.885602	-0.864431	0.90813	1.19941	-0.57938	-0.471293	-0.578208	0.0131754	-0.405049	-1.30374	-0.541944	-0.336069	0.225236	1.72037	3.1677	1.32883	-1.24319	1.06492	1.15848	-0.391836	0.316273	0.473682	-1.5834	-0.394572	0.0794773	0.44025	0.278881	-0.809146	-0.992603	-0.493099
5bdc099119a8cc5ee2c471209aac49e6	0.210738	0.196549	-0.908541	-0.885602	-0.864431	0.90813	1.19941	-0.57938	-0.471293	-0.578208	0.0131754	-0.405049	-1.30374	-0.541944	-0.336069	0.225236	1.72037	3.1677	1.32883	-1.24319	1.06492	1.15848	-0.391836	0.316273	0.473682	-1.5834	-0.394572	0.0794773	0.44025	0.278881	-0.809146	-0.992603	-0.493099
303a7154d796227f169b54201738c2ac	0.210738	0.196549	-0.908541	-0.885602	-0.864431	0.90813	1.19941	-0.57938	-0.471293	-0.578208	0.0131754	-0.405049	-1.30374	-0.541944	-0.336069	0.225236	1.72037	3.1677	1.32883	-1.24319	1.06492	1.15848	-0.391836	0.316273	0.473682	-1.5834	-0.394572	0.0794773	0.44025	0.278881	-0.809146	-0.992603	-0.493099
79fad958b6026bccfe149cfd9beb3e25	0.210738	0.196549	-0.908541	-0.885602	-0.864431	0.90813	1.19941	-0.57938	-0.471293	-0.578208	0.0131754	-0.405049	-1.30374	-0.541944	-0.336069	0.225236	1.72037	3.1677	1.32883	-1.24319	1.06492	1.15848	-0.391836	0.316273	0.473682	-1.5834	-0.394572	0.0794773	0.44025	0.278881	-0.809146	-0.992603	-0.493099
3192f0892c08ec282493637f4fa28d60	0.210738	0.196549	-0.908541	-0.885602	-0.864431	0.90813	1.19941	-0.57938	-0.471293	-0.578208	0.0131754	-0.405049	-1.30374	-0.541944	-0.336069	0.225236	1.72037	3.1677	1.32883	-1.24319	1.06492	1.15848	-0.391836	0.316273	0.473682	-1.5834	-0.394572	0.0794773	0.44025	0.278881	-0.809146	-0.992603	-0.493099
1fdede6e21ed4658240619861d131770	0.210738	0.196549	-0.908541	-0.885602	-0.864431	0.90813	1.19941	-0.57938	-0.471293	-0.578208	0.0131754	-0.405049	-1.30374	-0.541944	-0.336069	0.225236	1.72037	3.1677	1.32883	-1.24319	1.06492	1.15848	-0.391836	0.316273	0.473682	-1.5834	-0.394572	0.0794773	0.44025	0.278881	-0.809146	-0.992603	-0.493099
727992952afbbf55406b97e29855c9c2	-0.175046	-0.175046	-0.170919	-0.169771	5.57047	-0.174651	-0.175046	-0.168666	-0.171311	-0.166319	-0.175046	-0.175046	-0.175046	-0.173415	-0.174304	-0.175046	-0.175046	-0.175046	-0.175046	-0.175046	-0.175046	-0.175046	-0.175046	-0.175046	-0.175046	-0.175046	-0.175046	-0.175046	-0.175046	-0.175046	-0.175046	-0.175046	-0.175046
c0821f48ff8be6cf43419845a77cb065	-0.174463	-0.174463	-0.172606	-0.17208	-0.174463	-0.174288	-0.174463	-0.171577	5.57048	-0.170485	-0.174463	-0.174463	-0.174463	-0.173736	-0.174133	-0.174463	-0.174463	-0.174463	-0.174463	-0.174463	-0.174463	-0.174463	-0.174463	-0.174463	-0.174463	-0.174463	-0.174463	-0.174463	-0.174463	-0.174463	-0.174463	-0.174463	-0.174463
9f3ae9f6096976f00cd7c13a4717ff1c	-0.174815	-0.174815	-0.171686	-0.170801	-0.174815	-0.174518	-0.174815	-0.169956	-0.171991	-0.168127	-0.174815	-0.174815	5.57048	-0.173588	-0.174258	-0.174815	-0.174815	-0.174815	-0.174815	-0.174815	-0.174815	-0.174815	-0.174815	-0.174815	-0.174815	-0.174815	-0.174815	-0.174815	-0.174815	-0.174815	-0.174815	-0.174815	-0.174815
f64f55b1af9b863086103dbf76e94e9f	-0.174609	-0.174609	-0.174609	-0.174609	-0.174609	-0.174609	-0.174609	-0.174609	-0.174609	-0.174609	-0.174609	-0.174609	-0.174609	-0.174609	-0.174609	5.57048	-0.174609	-0.174609	-0.174609	-0.168407	-0.174609	-0.168492	-0.172918	-0.174609	-0.174609	-0.173005	-0.174609	-0.174609	-0.174609	-0.174609	-0.173928	-0.174088	-0.174425
f417de6fd53eab7a2c4ac59db6a21d04	-0.174397	-0.174397	-0.174397	-0.174397	-0.174397	-0.174397	-0.174397	-0.174397	-0.174397	-0.174397	-0.174397	-0.174397	-0.174397	-0.174397	-0.174397	-0.174397	-0.174397	5.57048	-0.174397	-0.170689	-0.174397	-0.170716	-0.173377	-0.174397	-0.174397	-0.17343	-0.174397	-0.174397	-0.174397	-0.174397	-0.173986	-0.174082	-0.174285
324a68faea87d16c8e64abc6856e10e5	-0.174788	-0.174788	-0.174788	-0.174788	-0.174788	-0.174788	-0.174788	-0.174788	-0.174788	-0.174788	-0.174788	-0.174788	-0.174788	-0.174788	-0.174788	-0.174788	-0.174788	-0.174788	-0.174788	-0.166185	-0.174788	-0.166356	-0.172465	-0.174788	-0.174788	-0.172581	-0.174788	-0.174788	-0.174788	-0.174788	-0.173854	5.57047	-0.174536
9fac45309651b2907fa6715ab127400c	-0.174685	-0.174685	-0.174685	-0.174685	-0.174685	-0.174685	-0.174685	-0.174685	-0.174685	-0.174685	-0.174685	-0.174685	-0.174685	-0.174685	-0.174685	-0.174685	-0.174685	-0.174685	-0.174685	-0.167485	-0.174685	-0.167617	-0.172736	-0.174685	-0.174685	-0.172834	-0.174685	-0.174685	-0.174685	-0.174685	-0.173902	-0.174085	5.57048
e4ef1c7b616eb842c0ff7a327e83bd76	0.210738	0.196549	-0.908541	-0.885602	-0.864431	0.90813	1.19941	-0.57938	-0.471293	-0.578208	0.0131754	-0.405049	-1.30374	-0.541944	-0.336069	0.225236	1.72037	3.1677	1.32883	-1.24319	1.06492	1.15848	-0.391836	0.316273	0.473682	-1.5834	-0.394572	0.0794773	0.44025	0.278881	-0.809146	-0.992603	-0.493099
c977f14c76481a059ef7ba611bb8b1d0	0.210738	0.196549	-0.908541	-0.885602	-0.864431	0.90813	1.19941	-0.57938	-0.471293	-0.578208	0.0131754	-0.405049	-1.30374	-0.541944	-0.336069	0.225236	1.72037	3.1677	1.32883	-1.24319	1.06492	1.15848	-0.391836	0.316273	0.473682	-1.5834	-0.394572	0.0794773	0.44025	0.278881	-0.809146	-0.992603	-0.493099
a728a1dce17d5afb4677e6cc919c2391	0.210738	0.196549	-0.908541	-0.885602	-0.864431	0.90813	1.19941	-0.57938	-0.471293	-0.578208	0.0131754	-0.405049	-1.30374	-0.541944	-0.336069	0.225236	1.72037	3.1677	1.32883	-1.24319	1.06492	1.15848	-0.391836	0.316273	0.473682	-1.5834	-0.394572	0.0794773	0.44025	0.278881	-0.809146	-0.992603	-0.493099
b5e14e3e645b8ad4632155a1045bfaf3	5.57048	-0.174553	-0.172535	-0.171967	-0.174553	-0.174361	-0.174553	-0.171423	-0.17273	-0.170252	-0.174553	-0.174553	-0.174553	-0.17376	-0.174193	-0.174553	-0.174553	-0.174553	-0.174553	-0.174553	-0.174553	-0.174553	-0.174553	-0.174553	-0.174553	-0.174553	-0.174553	-0.174553	-0.174553	-0.174553	-0.174553	-0.174553	-0.174553
ef3ebf04da336dddf62deca97ecece22	-0.174563	-0.174563	5.57048	-0.171516	-0.174563	-0.174338	-0.174563	-0.170874	-0.172421	-0.169482	-0.174563	-0.174563	-0.174563	-0.173633	-0.174141	-0.174563	-0.174563	-0.174563	-0.174563	-0.174563	-0.174563	-0.174563	-0.174563	-0.174563	-0.174563	-0.174563	-0.174563	-0.174563	-0.174563	-0.174563	-0.174563	-0.174563	-0.174563
2eac818509611cc64e6d24fe7a4f3332	-0.174428	-0.174428	-0.172923	-0.172498	-0.174428	5.57048	-0.174428	-0.172092	-0.173069	-0.171215	-0.174428	-0.174428	-0.174428	-0.173837	-0.17416	-0.174428	-0.174428	-0.174428	-0.174428	-0.174428	-0.174428	-0.174428	-0.174428	-0.174428	-0.174428	-0.174428	-0.174428	-0.174428	-0.174428	-0.174428	-0.174428	-0.174428	-0.174428
7661a66746783ad3907e166a58622b98	-0.174389	-0.174389	-0.172544	-0.17202	-0.174389	-0.174215	-0.174389	-0.171521	-0.172725	5.57048	-0.174389	-0.174389	-0.174389	-0.173667	-0.174062	-0.174389	-0.174389	-0.174389	-0.174389	-0.174389	-0.174389	-0.174389	-0.174389	-0.174389	-0.174389	-0.174389	-0.174389	-0.174389	-0.174389	-0.174389	-0.174389	-0.174389	-0.174389
9fd4ed7cfada5a311820796110d9884b	-0.174529	-0.174529	-0.174529	-0.174529	-0.174529	-0.174529	-0.174529	-0.174529	-0.174529	-0.174529	-0.174529	-0.174529	-0.174529	-0.174529	-0.174529	-0.174529	-0.174529	-0.174529	-0.174529	-0.169271	5.57048	-0.169323	-0.173088	-0.174529	-0.174529	-0.173163	-0.174529	-0.174529	-0.174529	-0.174529	-0.173949	-0.174085	-0.174372
665cb74177133812fbd4fe51cf90d931	-0.174666	-0.174666	-0.174666	-0.174666	-0.174666	-0.174666	-0.174666	-0.174666	-0.174666	-0.174666	-0.174666	-0.174666	-0.174666	-0.174666	-0.174666	-0.174666	-0.174666	-0.174666	-0.174666	-0.16781	-0.174666	-0.167878	-0.172787	-0.174666	-0.174666	-0.172885	-0.174666	5.57048	-0.174666	-0.174666	-0.17391	-0.174087	-0.174462
667e2095050a61e299876d8b5b13a0fc	0.210738	0.196549	-0.908541	-0.885602	-0.864431	0.90813	1.19941	-0.57938	-0.471293	-0.578208	0.0131754	-0.405049	-1.30374	-0.541944	-0.336069	0.225236	1.72037	3.1677	1.32883	-1.24319	1.06492	1.15848	-0.391836	0.316273	0.473682	-1.5834	-0.394572	0.0794773	0.44025	0.278881	-0.809146	-0.992603	-0.493099
96c8455ed2f33c1986a1ac784cd55d64	0.210738	0.196549	-0.908541	-0.885602	-0.864431	0.90813	1.19941	-0.57938	-0.471293	-0.578208	0.0131754	-0.405049	-1.30374	-0.541944	-0.336069	0.225236	1.72037	3.1677	1.32883	-1.24319	1.06492	1.15848	-0.391836	0.316273	0.473682	-1.5834	-0.394572	0.0794773	0.44025	0.278881	-0.809146	-0.992603	-0.493099
c8ec4491101c29c4487f3740d33ec71d	0.210738	0.196549	-0.908541	-0.885602	-0.864431	0.90813	1.19941	-0.57938	-0.471293	-0.578208	0.0131754	-0.405049	-1.30374	-0.541944	-0.336069	0.225236	1.72037	3.1677	1.32883	-1.24319	1.06492	1.15848	-0.391836	0.316273	0.473682	-1.5834	-0.394572	0.0794773	0.44025	0.278881	-0.809146	-0.992603	-0.493099
201df4785ef1b6d15c59c8cc91490b25	0.210738	0.196549	-0.908541	-0.885602	-0.864431	0.90813	1.19941	-0.57938	-0.471293	-0.578208	0.0131754	-0.405049	-1.30374	-0.541944	-0.336069	0.225236	1.72037	3.1677	1.32883	-1.24319	1.06492	1.15848	-0.391836	0.316273	0.473682	-1.5834	-0.394572	0.0794773	0.44025	0.278881	-0.809146	-0.992603	-0.493099
439c0b1b24a1903e711a8a171cbbe830	0.210738	0.196549	-0.908541	-0.885602	-0.864431	0.90813	1.19941	-0.57938	-0.471293	-0.578208	0.0131754	-0.405049	-1.30374	-0.541944	-0.336069	0.225236	1.72037	3.1677	1.32883	-1.24319	1.06492	1.15848	-0.391836	0.316273	0.473682	-1.5834	-0.394572	0.0794773	0.44025	0.278881	-0.809146	-0.992603	-0.493099
4d12fb9fad850656baa3ffc3e0af5397	0.210738	0.196549	-0.908541	-0.885602	-0.864431	0.90813	1.19941	-0.57938	-0.471293	-0.578208	0.0131754	-0.405049	-1.30374	-0.541944	-0.336069	0.225236	1.72037	3.1677	1.32883	-1.24319	1.06492	1.15848	-0.391836	0.316273	0.473682	-1.5834	-0.394572	0.0794773	0.44025	0.278881	-0.809146	-0.992603	-0.493099
c22b16cc6108c04f29fea3b6d4c81571	0.210738	0.196549	-0.908541	-0.885602	-0.864431	0.90813	1.19941	-0.57938	-0.471293	-0.578208	0.0131754	-0.405049	-1.30374	-0.541944	-0.336069	0.225236	1.72037	3.1677	1.32883	-1.24319	1.06492	1.15848	-0.391836	0.316273	0.473682	-1.5834	-0.394572	0.0794773	0.44025	0.278881	-0.809146	-0.992603	-0.493099
04551d3323a786ff624839f426ede82d	0.210738	0.196549	-0.908541	-0.885602	-0.864431	0.90813	1.19941	-0.57938	-0.471293	-0.578208	0.0131754	-0.405049	-1.30374	-0.541944	-0.336069	0.225236	1.72037	3.1677	1.32883	-1.24319	1.06492	1.15848	-0.391836	0.316273	0.473682	-1.5834	-0.394572	0.0794773	0.44025	0.278881	-0.809146	-0.992603	-0.493099
06538b77450f85903962437f449fa60a	-0.175034	-0.175034	-0.170113	5.57047	-0.175034	-0.174559	-0.175034	-0.167448	-0.170572	-0.164697	-0.175034	-0.175034	-0.175034	-0.173079	-0.174143	-0.175034	-0.175034	-0.175034	-0.175034	-0.175034	-0.175034	-0.175034	-0.175034	-0.175034	-0.175034	-0.175034	-0.175034	-0.175034	-0.175034	-0.175034	-0.175034	-0.175034	-0.175034
a9f2ee7b6f737ab311f8ca55c3eeb594	-0.174984	-0.174984	-0.171131	-0.170048	-0.174984	-0.174617	-0.174984	-0.169011	-0.171503	-0.166781	-0.174984	-0.174984	5.57047	-0.173469	-0.174296	-0.174984	-0.174984	-0.174984	-0.174984	-0.174984	-0.174984	-0.174984	-0.174984	-0.174984	-0.174984	-0.174984	-0.174984	-0.174984	-0.174984	-0.174984	-0.174984	-0.174984	-0.174984
9e69a842548c7309737da8f376e5b8cd	-0.174742	-0.174742	-0.174742	-0.174742	-0.174742	-0.174742	-0.174742	-0.174742	-0.174742	-0.174742	-0.174742	-0.174742	-0.174742	-0.174742	-0.174742	-0.174742	-0.174742	-0.174742	-0.174742	-0.167068	-0.174742	-0.167057	-0.172604	-0.174742	-0.174742	-0.172721	-0.174742	-0.174742	-0.174742	5.57048	-0.173879	-0.174081	-0.174508
b03c6b1b9605b21f1ccef79b4aaaff0c	0.210738	0.196549	-0.908541	-0.885602	-0.864431	0.90813	1.19941	-0.57938	-0.471293	-0.578208	0.0131754	-0.405049	-1.30374	-0.541944	-0.336069	0.225236	1.72037	3.1677	1.32883	-1.24319	1.06492	1.15848	-0.391836	0.316273	0.473682	-1.5834	-0.394572	0.0794773	0.44025	0.278881	-0.809146	-0.992603	-0.493099
4c661a9c5d25fe43a4d3f1a29a100d7c	0.210738	0.196549	-0.908541	-0.885602	-0.864431	0.90813	1.19941	-0.57938	-0.471293	-0.578208	0.0131754	-0.405049	-1.30374	-0.541944	-0.336069	0.225236	1.72037	3.1677	1.32883	-1.24319	1.06492	1.15848	-0.391836	0.316273	0.473682	-1.5834	-0.394572	0.0794773	0.44025	0.278881	-0.809146	-0.992603	-0.493099
e3bd536c33ed1da1984d13a11ef1195a	0.210738	0.196549	-0.908541	-0.885602	-0.864431	0.90813	1.19941	-0.57938	-0.471293	-0.578208	0.0131754	-0.405049	-1.30374	-0.541944	-0.336069	0.225236	1.72037	3.1677	1.32883	-1.24319	1.06492	1.15848	-0.391836	0.316273	0.473682	-1.5834	-0.394572	0.0794773	0.44025	0.278881	-0.809146	-0.992603	-0.493099
7963654625b74816cd1eb1373a31352b	0.210738	0.196549	-0.908541	-0.885602	-0.864431	0.90813	1.19941	-0.57938	-0.471293	-0.578208	0.0131754	-0.405049	-1.30374	-0.541944	-0.336069	0.225236	1.72037	3.1677	1.32883	-1.24319	1.06492	1.15848	-0.391836	0.316273	0.473682	-1.5834	-0.394572	0.0794773	0.44025	0.278881	-0.809146	-0.992603	-0.493099
15e3ef42d4591929c8121f18c0634a53	-0.174519	-0.174519	-0.172616	-0.172083	-0.174519	5.57048	-0.174519	-0.171572	-0.172799	-0.170476	-0.174519	-0.174519	-0.174519	-0.17377	-0.174179	-0.174519	-0.174519	-0.174519	-0.174519	-0.174519	-0.174519	-0.174519	-0.174519	-0.174519	-0.174519	-0.174519	-0.174519	-0.174519	-0.174519	-0.174519	-0.174519	-0.174519	-0.174519
306546f5f068c3630323684d422f1e95	-0.175102	-0.175102	-0.170744	-0.169524	-0.175102	-0.174686	-0.175102	-0.168354	-0.171162	-0.16585	-0.175102	-0.175102	5.57047	-0.173385	-0.174321	-0.175102	-0.175102	-0.175102	-0.175102	-0.175102	-0.175102	-0.175102	-0.175102	-0.175102	-0.175102	-0.175102	-0.175102	-0.175102	-0.175102	-0.175102	-0.175102	-0.175102	-0.175102
e067beeaad3ae7f401b782ffbaafaf51	-0.174712	-0.174712	-0.171867	-0.171069	-0.174712	-0.174441	-0.174712	-0.170304	-0.172141	-0.168662	-0.174712	-0.174712	-0.174712	5.57048	-0.174203	-0.174712	-0.174712	-0.174712	-0.174712	-0.174712	-0.174712	-0.174712	-0.174712	-0.174712	-0.174712	-0.174712	-0.174712	-0.174712	-0.174712	-0.174712	-0.174712	-0.174712	-0.174712
5e50a007ea9a7f83275157c158916fcc	-0.174907	-0.174907	-0.174907	-0.174907	-0.174907	-0.174907	-0.174907	-0.174907	-0.174907	-0.174907	-0.174907	-0.174907	-0.174907	-0.174907	-0.174907	-0.174907	-0.174907	-0.174907	-0.174907	-0.165226	-0.174907	-0.165213	-0.17221	-0.174907	-0.174907	-0.172357	-0.174907	-0.174907	-0.174907	-0.174907	-0.173818	-0.174073	5.57047
68974596d1fc8b2e593d424cae776601	0.210738	0.196549	-0.908541	-0.885602	-0.864431	0.90813	1.19941	-0.57938	-0.471293	-0.578208	0.0131754	-0.405049	-1.30374	-0.541944	-0.336069	0.225236	1.72037	3.1677	1.32883	-1.24319	1.06492	1.15848	-0.391836	0.316273	0.473682	-1.5834	-0.394572	0.0794773	0.44025	0.278881	-0.809146	-0.992603	-0.493099
128663d8fbf501fb5f4812f214e4f1bc	0.210738	0.196549	-0.908541	-0.885602	-0.864431	0.90813	1.19941	-0.57938	-0.471293	-0.578208	0.0131754	-0.405049	-1.30374	-0.541944	-0.336069	0.225236	1.72037	3.1677	1.32883	-1.24319	1.06492	1.15848	-0.391836	0.316273	0.473682	-1.5834	-0.394572	0.0794773	0.44025	0.278881	-0.809146	-0.992603	-0.493099
3e9e6197d0866ceeaa0d19f676601a4a	0.210738	0.196549	-0.908541	-0.885602	-0.864431	0.90813	1.19941	-0.57938	-0.471293	-0.578208	0.0131754	-0.405049	-1.30374	-0.541944	-0.336069	0.225236	1.72037	3.1677	1.32883	-1.24319	1.06492	1.15848	-0.391836	0.316273	0.473682	-1.5834	-0.394572	0.0794773	0.44025	0.278881	-0.809146	-0.992603	-0.493099
db8a7d7766655569b1fd2f4b84e8322b	0.210738	0.196549	-0.908541	-0.885602	-0.864431	0.90813	1.19941	-0.57938	-0.471293	-0.578208	0.0131754	-0.405049	-1.30374	-0.541944	-0.336069	0.225236	1.72037	3.1677	1.32883	-1.24319	1.06492	1.15848	-0.391836	0.316273	0.473682	-1.5834	-0.394572	0.0794773	0.44025	0.278881	-0.809146	-0.992603	-0.493099
3835eeaff29ff3d2eb1d8a1f426f0472	0.210738	0.196549	-0.908541	-0.885602	-0.864431	0.90813	1.19941	-0.57938	-0.471293	-0.578208	0.0131754	-0.405049	-1.30374	-0.541944	-0.336069	0.225236	1.72037	3.1677	1.32883	-1.24319	1.06492	1.15848	-0.391836	0.316273	0.473682	-1.5834	-0.394572	0.0794773	0.44025	0.278881	-0.809146	-0.992603	-0.493099
8e716caa71c9521bdc8b1be06b373c1b	0.210738	0.196549	-0.908541	-0.885602	-0.864431	0.90813	1.19941	-0.57938	-0.471293	-0.578208	0.0131754	-0.405049	-1.30374	-0.541944	-0.336069	0.225236	1.72037	3.1677	1.32883	-1.24319	1.06492	1.15848	-0.391836	0.316273	0.473682	-1.5834	-0.394572	0.0794773	0.44025	0.278881	-0.809146	-0.992603	-0.493099
808938559d03ba4c5c3ff7e91845409b	0.210738	0.196549	-0.908541	-0.885602	-0.864431	0.90813	1.19941	-0.57938	-0.471293	-0.578208	0.0131754	-0.405049	-1.30374	-0.541944	-0.336069	0.225236	1.72037	3.1677	1.32883	-1.24319	1.06492	1.15848	-0.391836	0.316273	0.473682	-1.5834	-0.394572	0.0794773	0.44025	0.278881	-0.809146	-0.992603	-0.493099
04a9298a95d2797745929b6c51dec3d3	0.210738	0.196549	-0.908541	-0.885602	-0.864431	0.90813	1.19941	-0.57938	-0.471293	-0.578208	0.0131754	-0.405049	-1.30374	-0.541944	-0.336069	0.225236	1.72037	3.1677	1.32883	-1.24319	1.06492	1.15848	-0.391836	0.316273	0.473682	-1.5834	-0.394572	0.0794773	0.44025	0.278881	-0.809146	-0.992603	-0.493099
a6bed81ae136bbcaf60c91d83befaa68	0.210738	0.196549	-0.908541	-0.885602	-0.864431	0.90813	1.19941	-0.57938	-0.471293	-0.578208	0.0131754	-0.405049	-1.30374	-0.541944	-0.336069	0.225236	1.72037	3.1677	1.32883	-1.24319	1.06492	1.15848	-0.391836	0.316273	0.473682	-1.5834	-0.394572	0.0794773	0.44025	0.278881	-0.809146	-0.992603	-0.493099
60f93fed83d17d00026301844c347826	-0.174792	-0.174792	5.57048	-0.170305	-0.174792	-0.174457	-0.174792	-0.169364	-0.171622	-0.167349	-0.174792	-0.174792	-0.174792	-0.17341	-0.174164	-0.174792	-0.174792	-0.174792	-0.174792	-0.174792	-0.174792	-0.174792	-0.174792	-0.174792	-0.174792	-0.174792	-0.174792	-0.174792	-0.174792	-0.174792	-0.174792	-0.174792	-0.174792
992d322b433f658bf4fc71de519bdc43	-0.174721	-0.174721	-0.174721	-0.174721	-0.174721	-0.174721	-0.174721	-0.174721	-0.174721	-0.174721	-0.174721	-0.174721	-0.174721	-0.174721	-0.174721	-0.174721	-0.174721	-0.174721	5.57048	-0.167397	-0.174721	-0.167248	-0.172623	-0.174721	-0.174721	-0.172747	-0.174721	-0.174721	-0.174721	-0.174721	-0.173872	-0.17407	-0.17449
831d51ba8da1bd8f91a29fd2197c6f2e	-0.174385	-0.174385	-0.174385	-0.174385	-0.174385	-0.174385	-0.174385	-0.174385	-0.174385	-0.174385	-0.174385	-0.174385	-0.174385	-0.174385	-0.174385	-0.174385	-0.174385	-0.174385	-0.174385	-0.16882	-0.174385	5.57048	-0.17284	-0.174385	-0.174385	-0.172924	-0.174385	-0.174385	-0.174385	-0.174385	-0.173762	-0.173908	-0.174216
d2647cb08be6045bf52026c4b65cf711	-0.174825	-0.174825	-0.174825	-0.174825	-0.174825	-0.174825	-0.174825	-0.174825	-0.174825	-0.174825	-0.174825	-0.174825	-0.174825	-0.174825	-0.174825	-0.174825	-0.174825	-0.174825	-0.174825	-0.166288	-0.174825	-0.166151	-0.172395	-0.174825	5.57047	-0.172536	-0.174825	-0.174825	-0.174825	-0.174825	-0.173842	-0.174072	-0.174558
8a47d1c31ecaf4f32812c430bbb43980	-0.175058	-0.175058	-0.175058	-0.175058	-0.175058	-0.175058	-0.175058	-0.175058	-0.175058	-0.175058	-0.175058	-0.175058	-0.175058	-0.175058	-0.175058	-0.175058	-0.175058	-0.175058	-0.175058	-0.163863	-0.175058	-0.163686	-0.171873	-0.175058	-0.175058	-0.172057	5.57046	-0.175058	-0.175058	-0.175058	-0.173769	-0.17407	-0.174708
2d7ae0abe9c7db46286af839de074e5c	0.210738	0.196549	-0.908541	-0.885602	-0.864431	0.90813	1.19941	-0.57938	-0.471293	-0.578208	0.0131754	-0.405049	-1.30374	-0.541944	-0.336069	0.225236	1.72037	3.1677	1.32883	-1.24319	1.06492	1.15848	-0.391836	0.316273	0.473682	-1.5834	-0.394572	0.0794773	0.44025	0.278881	-0.809146	-0.992603	-0.493099
17637b706d212ed577834ef8b5ded2d1	0.210738	0.196549	-0.908541	-0.885602	-0.864431	0.90813	1.19941	-0.57938	-0.471293	-0.578208	0.0131754	-0.405049	-1.30374	-0.541944	-0.336069	0.225236	1.72037	3.1677	1.32883	-1.24319	1.06492	1.15848	-0.391836	0.316273	0.473682	-1.5834	-0.394572	0.0794773	0.44025	0.278881	-0.809146	-0.992603	-0.493099
65e2cb05bce0635c93137fd1dbb84367	0.210738	0.196549	-0.908541	-0.885602	-0.864431	0.90813	1.19941	-0.57938	-0.471293	-0.578208	0.0131754	-0.405049	-1.30374	-0.541944	-0.336069	0.225236	1.72037	3.1677	1.32883	-1.24319	1.06492	1.15848	-0.391836	0.316273	0.473682	-1.5834	-0.394572	0.0794773	0.44025	0.278881	-0.809146	-0.992603	-0.493099
2312fa68895be3d61975e48dda211263	0.210738	0.196549	-0.908541	-0.885602	-0.864431	0.90813	1.19941	-0.57938	-0.471293	-0.578208	0.0131754	-0.405049	-1.30374	-0.541944	-0.336069	0.225236	1.72037	3.1677	1.32883	-1.24319	1.06492	1.15848	-0.391836	0.316273	0.473682	-1.5834	-0.394572	0.0794773	0.44025	0.278881	-0.809146	-0.992603	-0.493099
fb2e82b4ca0ee01328fafc6994b9be9f	0.210738	0.196549	-0.908541	-0.885602	-0.864431	0.90813	1.19941	-0.57938	-0.471293	-0.578208	0.0131754	-0.405049	-1.30374	-0.541944	-0.336069	0.225236	1.72037	3.1677	1.32883	-1.24319	1.06492	1.15848	-0.391836	0.316273	0.473682	-1.5834	-0.394572	0.0794773	0.44025	0.278881	-0.809146	-0.992603	-0.493099
0570b4a067b34904d37cb5ddc848b221	0.210738	0.196549	-0.908541	-0.885602	-0.864431	0.90813	1.19941	-0.57938	-0.471293	-0.578208	0.0131754	-0.405049	-1.30374	-0.541944	-0.336069	0.225236	1.72037	3.1677	1.32883	-1.24319	1.06492	1.15848	-0.391836	0.316273	0.473682	-1.5834	-0.394572	0.0794773	0.44025	0.278881	-0.809146	-0.992603	-0.493099
dc2134ebeb26d11a284b3d8a077230fd	0.210738	0.196549	-0.908541	-0.885602	-0.864431	0.90813	1.19941	-0.57938	-0.471293	-0.578208	0.0131754	-0.405049	-1.30374	-0.541944	-0.336069	0.225236	1.72037	3.1677	1.32883	-1.24319	1.06492	1.15848	-0.391836	0.316273	0.473682	-1.5834	-0.394572	0.0794773	0.44025	0.278881	-0.809146	-0.992603	-0.493099
1979b52cc4cba7f03ca299ef8ab53e02	0.210738	0.196549	-0.908541	-0.885602	-0.864431	0.90813	1.19941	-0.57938	-0.471293	-0.578208	0.0131754	-0.405049	-1.30374	-0.541944	-0.336069	0.225236	1.72037	3.1677	1.32883	-1.24319	1.06492	1.15848	-0.391836	0.316273	0.473682	-1.5834	-0.394572	0.0794773	0.44025	0.278881	-0.809146	-0.992603	-0.493099
0567cf5d1457293b1fa286dd6d96ff63	-0.174942	-0.174942	-0.174942	-0.174942	-0.174942	-0.174942	-0.174942	-0.174942	-0.174942	-0.174942	-0.174942	-0.174942	-0.174942	-0.174942	-0.174942	-0.174942	-0.174942	-0.174942	-0.174942	-0.165172	-0.174942	-0.164882	-0.172106	-0.174942	5.57047	-0.172279	-0.174942	-0.174942	-0.174942	-0.174942	-0.173791	-0.17406	-0.174629
c1fb523690f4db6515ed0ab146d1ab8c	-0.175365	-0.175365	-0.175365	-0.175365	-0.175365	-0.175365	-0.175365	-0.175365	-0.175365	-0.175365	-0.175365	-0.175365	-0.175365	-0.175365	-0.175365	-0.175365	-0.175365	-0.175365	-0.175365	-0.160259	-0.175365	-0.159909	-0.171021	-0.175365	-0.175365	-0.17128	-0.175365	-0.175365	-0.175365	-0.175365	-0.173605	5.57045	-0.174887
b41f0d374a5326aa19b600f20cdcbbe9	-0.175365	-0.175365	-0.175365	-0.175365	-0.175365	-0.175365	-0.175365	-0.175365	-0.175365	-0.175365	-0.175365	-0.175365	-0.175365	-0.175365	-0.175365	-0.175365	-0.175365	-0.175365	-0.175365	-0.160259	-0.175365	-0.159909	-0.171021	-0.175365	-0.175365	-0.17128	-0.175365	-0.175365	-0.175365	-0.175365	-0.173605	5.57045	-0.174887
fcfc259df19c81f8b6701748baaaa360	0.210738	0.196549	-0.908541	-0.885602	-0.864431	0.90813	1.19941	-0.57938	-0.471293	-0.578208	0.0131754	-0.405049	-1.30374	-0.541944	-0.336069	0.225236	1.72037	3.1677	1.32883	-1.24319	1.06492	1.15848	-0.391836	0.316273	0.473682	-1.5834	-0.394572	0.0794773	0.44025	0.278881	-0.809146	-0.992603	-0.493099
7911816f5e81f650f769aba0d5c708cb	0.210738	0.196549	-0.908541	-0.885602	-0.864431	0.90813	1.19941	-0.57938	-0.471293	-0.578208	0.0131754	-0.405049	-1.30374	-0.541944	-0.336069	0.225236	1.72037	3.1677	1.32883	-1.24319	1.06492	1.15848	-0.391836	0.316273	0.473682	-1.5834	-0.394572	0.0794773	0.44025	0.278881	-0.809146	-0.992603	-0.493099
637b9b3f4d1cbb1a10c07817619cdf69	0.210738	0.196549	-0.908541	-0.885602	-0.864431	0.90813	1.19941	-0.57938	-0.471293	-0.578208	0.0131754	-0.405049	-1.30374	-0.541944	-0.336069	0.225236	1.72037	3.1677	1.32883	-1.24319	1.06492	1.15848	-0.391836	0.316273	0.473682	-1.5834	-0.394572	0.0794773	0.44025	0.278881	-0.809146	-0.992603	-0.493099
61fb5ca7cdf03302d8aa64792733a5eb	0.210738	0.196549	-0.908541	-0.885602	-0.864431	0.90813	1.19941	-0.57938	-0.471293	-0.578208	0.0131754	-0.405049	-1.30374	-0.541944	-0.336069	0.225236	1.72037	3.1677	1.32883	-1.24319	1.06492	1.15848	-0.391836	0.316273	0.473682	-1.5834	-0.394572	0.0794773	0.44025	0.278881	-0.809146	-0.992603	-0.493099
b45da9d1f0811cc7c44a73c54f23360a	0.210738	0.196549	-0.908541	-0.885602	-0.864431	0.90813	1.19941	-0.57938	-0.471293	-0.578208	0.0131754	-0.405049	-1.30374	-0.541944	-0.336069	0.225236	1.72037	3.1677	1.32883	-1.24319	1.06492	1.15848	-0.391836	0.316273	0.473682	-1.5834	-0.394572	0.0794773	0.44025	0.278881	-0.809146	-0.992603	-0.493099
a635be9ee7fc9b03ade2fd010b2bb1be	0.210738	0.196549	-0.908541	-0.885602	-0.864431	0.90813	1.19941	-0.57938	-0.471293	-0.578208	0.0131754	-0.405049	-1.30374	-0.541944	-0.336069	0.225236	1.72037	3.1677	1.32883	-1.24319	1.06492	1.15848	-0.391836	0.316273	0.473682	-1.5834	-0.394572	0.0794773	0.44025	0.278881	-0.809146	-0.992603	-0.493099
c621bde528e7450598a596f6faae8232	0.210738	0.196549	-0.908541	-0.885602	-0.864431	0.90813	1.19941	-0.57938	-0.471293	-0.578208	0.0131754	-0.405049	-1.30374	-0.541944	-0.336069	0.225236	1.72037	3.1677	1.32883	-1.24319	1.06492	1.15848	-0.391836	0.316273	0.473682	-1.5834	-0.394572	0.0794773	0.44025	0.278881	-0.809146	-0.992603	-0.493099
04ae20059ea631465916b06982741650	0.210738	0.196549	-0.908541	-0.885602	-0.864431	0.90813	1.19941	-0.57938	-0.471293	-0.578208	0.0131754	-0.405049	-1.30374	-0.541944	-0.336069	0.225236	1.72037	3.1677	1.32883	-1.24319	1.06492	1.15848	-0.391836	0.316273	0.473682	-1.5834	-0.394572	0.0794773	0.44025	0.278881	-0.809146	-0.992603	-0.493099
77bb9b2264b705375cb1f9b18ed3534a	5.57047	-0.175048	-0.170899	-0.169766	-0.175048	-0.174644	-0.175048	-0.168668	-0.171279	-0.166384	-0.175048	-0.175048	-0.175048	-0.173391	-0.174292	-0.175048	-0.175048	-0.175048	-0.175048	-0.175048	-0.175048	-0.175048	-0.175048	-0.175048	-0.175048	-0.175048	-0.175048	-0.175048	-0.175048	-0.175048	-0.175048	-0.175048	-0.175048
aba192ae2bf08782124fde94aa2c0290	-0.174954	-0.174954	-0.174954	-0.174954	-0.174954	-0.174954	-0.174954	-0.174954	-0.174954	-0.174954	-0.174954	-0.174954	-0.174954	-0.174954	-0.174954	-0.174954	-0.174954	-0.174954	5.57047	-0.165221	-0.174954	-0.164711	-0.172035	-0.174954	-0.174954	-0.172229	-0.174954	-0.174954	-0.174954	-0.174954	-0.173764	-0.174041	-0.174629
eaccf6ce0a3d37ad2ddbd0fe4b3d6fe9	-0.175103	-0.175103	-0.175103	-0.175103	-0.175103	-0.175103	-0.175103	-0.175103	-0.175103	-0.175103	-0.175103	-0.175103	-0.175103	-0.175103	-0.175103	-0.175103	-0.175103	-0.175103	-0.175103	-0.163676	-0.175103	-0.163126	-0.171697	-0.175103	5.57046	-0.171919	-0.175103	-0.175103	-0.175103	-0.175103	-0.173716	-0.174039	-0.174724
bd7231f6fd4d72d171b878cf1b6eb393	0.210738	0.196549	-0.908541	-0.885602	-0.864431	0.90813	1.19941	-0.57938	-0.471293	-0.578208	0.0131754	-0.405049	-1.30374	-0.541944	-0.336069	0.225236	1.72037	3.1677	1.32883	-1.24319	1.06492	1.15848	-0.391836	0.316273	0.473682	-1.5834	-0.394572	0.0794773	0.44025	0.278881	-0.809146	-0.992603	-0.493099
b2224d09fb56fffb7949a37935a5b572	0.210738	0.196549	-0.908541	-0.885602	-0.864431	0.90813	1.19941	-0.57938	-0.471293	-0.578208	0.0131754	-0.405049	-1.30374	-0.541944	-0.336069	0.225236	1.72037	3.1677	1.32883	-1.24319	1.06492	1.15848	-0.391836	0.316273	0.473682	-1.5834	-0.394572	0.0794773	0.44025	0.278881	-0.809146	-0.992603	-0.493099
eafcb26645225579ff00471d18e93b5b	0.210738	0.196549	-0.908541	-0.885602	-0.864431	0.90813	1.19941	-0.57938	-0.471293	-0.578208	0.0131754	-0.405049	-1.30374	-0.541944	-0.336069	0.225236	1.72037	3.1677	1.32883	-1.24319	1.06492	1.15848	-0.391836	0.316273	0.473682	-1.5834	-0.394572	0.0794773	0.44025	0.278881	-0.809146	-0.992603	-0.493099
9fc9295b222377c7bdb7e4e4db1e5e78	0.210738	0.196549	-0.908541	-0.885602	-0.864431	0.90813	1.19941	-0.57938	-0.471293	-0.578208	0.0131754	-0.405049	-1.30374	-0.541944	-0.336069	0.225236	1.72037	3.1677	1.32883	-1.24319	1.06492	1.15848	-0.391836	0.316273	0.473682	-1.5834	-0.394572	0.0794773	0.44025	0.278881	-0.809146	-0.992603	-0.493099
fc5b68c824f7bbc2a9f414fb6af8169e	0.210738	0.196549	-0.908541	-0.885602	-0.864431	0.90813	1.19941	-0.57938	-0.471293	-0.578208	0.0131754	-0.405049	-1.30374	-0.541944	-0.336069	0.225236	1.72037	3.1677	1.32883	-1.24319	1.06492	1.15848	-0.391836	0.316273	0.473682	-1.5834	-0.394572	0.0794773	0.44025	0.278881	-0.809146	-0.992603	-0.493099
1136907cd4d21a54cbfd697149b5503a	0.210738	0.196549	-0.908541	-0.885602	-0.864431	0.90813	1.19941	-0.57938	-0.471293	-0.578208	0.0131754	-0.405049	-1.30374	-0.541944	-0.336069	0.225236	1.72037	3.1677	1.32883	-1.24319	1.06492	1.15848	-0.391836	0.316273	0.473682	-1.5834	-0.394572	0.0794773	0.44025	0.278881	-0.809146	-0.992603	-0.493099
9b343774a9eba0f24861bbf2683faccb	0.210738	0.196549	-0.908541	-0.885602	-0.864431	0.90813	1.19941	-0.57938	-0.471293	-0.578208	0.0131754	-0.405049	-1.30374	-0.541944	-0.336069	0.225236	1.72037	3.1677	1.32883	-1.24319	1.06492	1.15848	-0.391836	0.316273	0.473682	-1.5834	-0.394572	0.0794773	0.44025	0.278881	-0.809146	-0.992603	-0.493099
fb75cf7155262f2e184aa0ce252eb045	0.210738	0.196549	-0.908541	-0.885602	-0.864431	0.90813	1.19941	-0.57938	-0.471293	-0.578208	0.0131754	-0.405049	-1.30374	-0.541944	-0.336069	0.225236	1.72037	3.1677	1.32883	-1.24319	1.06492	1.15848	-0.391836	0.316273	0.473682	-1.5834	-0.394572	0.0794773	0.44025	0.278881	-0.809146	-0.992603	-0.493099
b0fff0788c980929fc4bf71e985f57f0	0.210738	0.196549	-0.908541	-0.885602	-0.864431	0.90813	1.19941	-0.57938	-0.471293	-0.578208	0.0131754	-0.405049	-1.30374	-0.541944	-0.336069	0.225236	1.72037	3.1677	1.32883	-1.24319	1.06492	1.15848	-0.391836	0.316273	0.473682	-1.5834	-0.394572	0.0794773	0.44025	0.278881	-0.809146	-0.992603	-0.493099
a724c8f01abadc1581d8aa3227b27de1	0.210738	0.196549	-0.908541	-0.885602	-0.864431	0.90813	1.19941	-0.57938	-0.471293	-0.578208	0.0131754	-0.405049	-1.30374	-0.541944	-0.336069	0.225236	1.72037	3.1677	1.32883	-1.24319	1.06492	1.15848	-0.391836	0.316273	0.473682	-1.5834	-0.394572	0.0794773	0.44025	0.278881	-0.809146	-0.992603	-0.493099
00257344a745394a66444d38dbd49b6f	0.210738	0.196549	-0.908541	-0.885602	-0.864431	0.90813	1.19941	-0.57938	-0.471293	-0.578208	0.0131754	-0.405049	-1.30374	-0.541944	-0.336069	0.225236	1.72037	3.1677	1.32883	-1.24319	1.06492	1.15848	-0.391836	0.316273	0.473682	-1.5834	-0.394572	0.0794773	0.44025	0.278881	-0.809146	-0.992603	-0.493099
c218de2193699ad8f9ed221a3b6bf965	0.210738	0.196549	-0.908541	-0.885602	-0.864431	0.90813	1.19941	-0.57938	-0.471293	-0.578208	0.0131754	-0.405049	-1.30374	-0.541944	-0.336069	0.225236	1.72037	3.1677	1.32883	-1.24319	1.06492	1.15848	-0.391836	0.316273	0.473682	-1.5834	-0.394572	0.0794773	0.44025	0.278881	-0.809146	-0.992603	-0.493099
071adc1f6119b36a43480ff85d58b23a	0.210738	0.196549	-0.908541	-0.885602	-0.864431	0.90813	1.19941	-0.57938	-0.471293	-0.578208	0.0131754	-0.405049	-1.30374	-0.541944	-0.336069	0.225236	1.72037	3.1677	1.32883	-1.24319	1.06492	1.15848	-0.391836	0.316273	0.473682	-1.5834	-0.394572	0.0794773	0.44025	0.278881	-0.809146	-0.992603	-0.493099
12b0723a08d5cc4a3cfdfb2d45259f16	-0.175314	-0.175314	-0.168932	5.57046	-0.175314	-0.17469	-0.175314	-0.165518	-0.169508	-0.162048	-0.175314	-0.175314	-0.175314	-0.172756	-0.174145	-0.175314	-0.175314	-0.175314	-0.175314	-0.175314	-0.175314	-0.175314	-0.175314	-0.175314	-0.175314	-0.175314	-0.175314	-0.175314	-0.175314	-0.175314	-0.175314	-0.175314	-0.175314
b7b44dbfb9d929d06ccb3fbf43497406	-0.175009	-0.175009	-0.170964	-0.169873	-0.175009	5.57047	-0.175009	-0.16881	-0.171326	-0.166631	-0.175009	-0.175009	-0.175009	-0.173383	-0.174265	-0.175009	-0.175009	-0.175009	-0.175009	-0.175009	-0.175009	-0.175009	-0.175009	-0.175009	-0.175009	-0.175009	-0.175009	-0.175009	-0.175009	-0.175009	-0.175009	-0.175009	-0.175009
3f2528fd60a3c6bfdd9c72b69f0f91ae	-0.175138	-0.175138	-0.175138	-0.175138	-0.175138	-0.175138	-0.175138	-0.175138	-0.175138	-0.175138	-0.175138	-0.175138	-0.175138	-0.175138	-0.175138	-0.175138	-0.175138	-0.175138	-0.175138	5.57045	-0.175138	-0.156116	-0.16973	-0.175138	-0.175138	-0.170083	-0.175138	-0.175138	-0.175138	-0.175138	-0.172936	-0.173449	-0.174538
5bdcc4f398733446f6ff3136e5cdd613	-0.175461	-0.175461	-0.175461	-0.175461	-0.175461	-0.175461	-0.175461	-0.175461	-0.175461	-0.175461	-0.175461	-0.175461	-0.175461	-0.175461	-0.175461	-0.175461	-0.175461	-0.175461	-0.175461	-0.160383	-0.175461	-0.1592	-0.170769	5.57044	-0.175461	-0.171109	-0.175461	-0.175461	-0.175461	-0.175461	-0.173538	-0.173985	-0.174934
a771e9905f84b37f1573537c67ddafd7	-0.175732	-0.175732	-0.175732	-0.175732	-0.175732	-0.175732	-0.175732	-0.175732	-0.175732	-0.175732	-0.175732	-0.175732	-0.175732	-0.175732	-0.175732	-0.175732	-0.175732	-0.175732	-0.175732	-0.157653	-0.175732	-0.156298	-0.170134	-0.175732	-0.175732	-0.170534	5.57043	-0.175732	-0.175732	-0.175732	-0.173439	-0.173972	-0.175104
dbead69b046f515eb1d5435e649c2835	0.210738	0.196549	-0.908541	-0.885602	-0.864431	0.90813	1.19941	-0.57938	-0.471293	-0.578208	0.0131754	-0.405049	-1.30374	-0.541944	-0.336069	0.225236	1.72037	3.1677	1.32883	-1.24319	1.06492	1.15848	-0.391836	0.316273	0.473682	-1.5834	-0.394572	0.0794773	0.44025	0.278881	-0.809146	-0.992603	-0.493099
1de613c1c9c20705fdbb203f29385cb8	0.210738	0.196549	-0.908541	-0.885602	-0.864431	0.90813	1.19941	-0.57938	-0.471293	-0.578208	0.0131754	-0.405049	-1.30374	-0.541944	-0.336069	0.225236	1.72037	3.1677	1.32883	-1.24319	1.06492	1.15848	-0.391836	0.316273	0.473682	-1.5834	-0.394572	0.0794773	0.44025	0.278881	-0.809146	-0.992603	-0.493099
7e6862c14c957fb2c05ad5c7ae773ea2	0.210738	0.196549	-0.908541	-0.885602	-0.864431	0.90813	1.19941	-0.57938	-0.471293	-0.578208	0.0131754	-0.405049	-1.30374	-0.541944	-0.336069	0.225236	1.72037	3.1677	1.32883	-1.24319	1.06492	1.15848	-0.391836	0.316273	0.473682	-1.5834	-0.394572	0.0794773	0.44025	0.278881	-0.809146	-0.992603	-0.493099
64ae564a734f621d8ee45e0c99625627	0.210738	0.196549	-0.908541	-0.885602	-0.864431	0.90813	1.19941	-0.57938	-0.471293	-0.578208	0.0131754	-0.405049	-1.30374	-0.541944	-0.336069	0.225236	1.72037	3.1677	1.32883	-1.24319	1.06492	1.15848	-0.391836	0.316273	0.473682	-1.5834	-0.394572	0.0794773	0.44025	0.278881	-0.809146	-0.992603	-0.493099
2c220f369bb1e0a929da148e988603ef	0.210738	0.196549	-0.908541	-0.885602	-0.864431	0.90813	1.19941	-0.57938	-0.471293	-0.578208	0.0131754	-0.405049	-1.30374	-0.541944	-0.336069	0.225236	1.72037	3.1677	1.32883	-1.24319	1.06492	1.15848	-0.391836	0.316273	0.473682	-1.5834	-0.394572	0.0794773	0.44025	0.278881	-0.809146	-0.992603	-0.493099
bfc648495e4ef0c8b1c5801044a45734	0.210738	0.196549	-0.908541	-0.885602	-0.864431	0.90813	1.19941	-0.57938	-0.471293	-0.578208	0.0131754	-0.405049	-1.30374	-0.541944	-0.336069	0.225236	1.72037	3.1677	1.32883	-1.24319	1.06492	1.15848	-0.391836	0.316273	0.473682	-1.5834	-0.394572	0.0794773	0.44025	0.278881	-0.809146	-0.992603	-0.493099
75e6fb490b4b6e45ddb31a61a1596272	0.210738	0.196549	-0.908541	-0.885602	-0.864431	0.90813	1.19941	-0.57938	-0.471293	-0.578208	0.0131754	-0.405049	-1.30374	-0.541944	-0.336069	0.225236	1.72037	3.1677	1.32883	-1.24319	1.06492	1.15848	-0.391836	0.316273	0.473682	-1.5834	-0.394572	0.0794773	0.44025	0.278881	-0.809146	-0.992603	-0.493099
068007b294d42b2d0620a36a7541eb18	0.210738	0.196549	-0.908541	-0.885602	-0.864431	0.90813	1.19941	-0.57938	-0.471293	-0.578208	0.0131754	-0.405049	-1.30374	-0.541944	-0.336069	0.225236	1.72037	3.1677	1.32883	-1.24319	1.06492	1.15848	-0.391836	0.316273	0.473682	-1.5834	-0.394572	0.0794773	0.44025	0.278881	-0.809146	-0.992603	-0.493099
dfed1852efee42e6b21b9f8a308ca957	0.210738	0.196549	-0.908541	-0.885602	-0.864431	0.90813	1.19941	-0.57938	-0.471293	-0.578208	0.0131754	-0.405049	-1.30374	-0.541944	-0.336069	0.225236	1.72037	3.1677	1.32883	-1.24319	1.06492	1.15848	-0.391836	0.316273	0.473682	-1.5834	-0.394572	0.0794773	0.44025	0.278881	-0.809146	-0.992603	-0.493099
3dcc4db435784c4f0f1cd25bce8e16c6	0.210738	0.196549	-0.908541	-0.885602	-0.864431	0.90813	1.19941	-0.57938	-0.471293	-0.578208	0.0131754	-0.405049	-1.30374	-0.541944	-0.336069	0.225236	1.72037	3.1677	1.32883	-1.24319	1.06492	1.15848	-0.391836	0.316273	0.473682	-1.5834	-0.394572	0.0794773	0.44025	0.278881	-0.809146	-0.992603	-0.493099
0d456cb0e4c496f02d70d5ab6f67ed58	0.210738	0.196549	-0.908541	-0.885602	-0.864431	0.90813	1.19941	-0.57938	-0.471293	-0.578208	0.0131754	-0.405049	-1.30374	-0.541944	-0.336069	0.225236	1.72037	3.1677	1.32883	-1.24319	1.06492	1.15848	-0.391836	0.316273	0.473682	-1.5834	-0.394572	0.0794773	0.44025	0.278881	-0.809146	-0.992603	-0.493099
27fc70432e1b555846ddfe9dfd25edb9	0.210738	0.196549	-0.908541	-0.885602	-0.864431	0.90813	1.19941	-0.57938	-0.471293	-0.578208	0.0131754	-0.405049	-1.30374	-0.541944	-0.336069	0.225236	1.72037	3.1677	1.32883	-1.24319	1.06492	1.15848	-0.391836	0.316273	0.473682	-1.5834	-0.394572	0.0794773	0.44025	0.278881	-0.809146	-0.992603	-0.493099
2269e7c00ec6fdbeefd8148b1ec3af96	0.210738	0.196549	-0.908541	-0.885602	-0.864431	0.90813	1.19941	-0.57938	-0.471293	-0.578208	0.0131754	-0.405049	-1.30374	-0.541944	-0.336069	0.225236	1.72037	3.1677	1.32883	-1.24319	1.06492	1.15848	-0.391836	0.316273	0.473682	-1.5834	-0.394572	0.0794773	0.44025	0.278881	-0.809146	-0.992603	-0.493099

## Sheet: Male-Ctrl_vs_Treatment-DEGs-Zsc
ASV	MC1-PV10	MC1-PV11	MC1-PV7	MC1-PV8	MC1-PV9	MC2-PV18	MC2-PV19	MC2-PV20	MC2-PV21	MC2-PV22	MC3-PV29	MC3-PV30	MC3-PV31	MC3-PV32	MC3-PV33	MT1-PV1	MT1-PV2	MT1-PV3	MT1-PV4	MT1-PV5	MT1-PV6	MT2-PV12	MT2-PV13	MT2-PV14	MT2-PV15	MT2-PV16	MT2-PV17	MT3-PV23	MT3-PV24	MT3-PV25	MT3-PV26	MT3-PV27	MT3-PV28
d60593a75368eb2dd66ecbbec3313863	1.88445764256497	0.64047111421472	-1.220125609681	-1.04845959866938	-0.712605133261749	-0.623358381821724	0.543689479896243	-0.961080149911522	2.19952956126434	0.931145801210169	-0.671198830088034	-0.493181904740121	-0.836038357306839	-1.34969555215366	0.956452835311009	-1.18567292918891	-0.651302089562179	1.46375664870348	-0.0981668835481621	0.628825307709854	0.209939483460784	-0.960357467188825	0.144344472128923	0.11406545673328	-0.755971152264088	0.768399869522015	0.204351881702087	0.187050749197405	1.23256452644914	-0.546569629315972	-0.50266531327741	1.7842167316097	-1.27681257969853
f80166d86a7f15b69b6ac97505299c3a	0.258821450677622	-0.886469963419342	-1.45176070695793	-1.44306604346901	-0.923676991580582	-0.310263346777909	-0.728263694645544	0.618583412150635	-0.578540410865097	-1.03242076438228	0.953948332261017	0.942403664483279	0.603640424818454	-1.39701705524642	0.730051390549581	-0.371755423724769	-0.114558962535393	1.80162145997376	0.821866374683899	0.404012018686752	0.377100609050836	-1.12079817445425	1.52547685382916	2.55510576203352	-0.0795556026072658	0.184689495225802	-0.740223186598268	0.0635899763846832	1.18722972157164	0.17458075990322	-0.0814691044352833	-0.409931087099505	-1.53295118748502
7bacf637b0a935317e9de08fd1bcb72c	1.15181527333867	1.83435933801139	-0.942595487171474	-0.67614281334961	-0.661421886601539	-0.961604745097873	-0.650586256578364	-0.947612688437798	-0.640561384473253	1.38394986361518	-0.735977645308087	-0.499547228173017	-0.82893203131472	-0.487237365764914	-0.0195520958842654	1.77636587270651	0.0634237678960054	-0.953837355165069	0.975829235861421	-0.451575010346345	-0.119995754438297	-0.23280550152279	1.06983278668885	-0.358188571902115	2.10051013399589	-0.794956100916124	-0.464037632827162	-0.439204088813505	-0.0790630183329068	1.77328777596245	1.58263832820237	-0.848201825184021	-0.918375888675494
c2c9d37c184935fe0f8a889e7105c241	-0.6315571162661	0.780406366090951	1.90240459034437	0.194494582727815	0.362679490658652	-0.349452189006868	-0.92563322523273	-0.513692427428491	-0.141409653198905	-0.411317135659478	2.32425490574561	-0.902192893263828	-0.0104803635520111	1.86163283606416	0.00426336391010103	0.644862317604209	-0.304903774563469	-0.689410820560537	-0.656805952146192	-0.403615397651424	-0.364490426582996	-0.807754007053063	-0.535808016422527	-0.890494904079227	-0.610992026481616	-0.336504908612587	-0.7628827637068	0.814831377688461	-0.6702834606362	-0.458063681457493	-0.03975979325025	-0.614748532461533	3.14242363843999
b44aff2995f396f00ad579d8e6684335	1.06485360319128	-0.159369302581044	-0.733138889165716	-1.7030471722125	-0.393700912051182	-0.1268736104966	1.02652104417221	-0.329975870006476	1.30963961487946	-0.19765150703393	1.21885919379835	0.669104247577751	0.494620048506913	-1.6928325461742	0.863707780410129	-1.84423905243939	-0.576852565581441	0.618589296508966	-0.73323150853611	1.09444867310592	0.959924928261024	-1.7338256224225	-0.614605645637023	0.421304370222815	-0.846465552954635	1.41053056135757	1.2768928718132	0.37270703881059	0.0981580430785211	-0.47472186835216	-0.80485660287673	1.22228293306582	-1.15675602023888
fdbff060c0adc3184b21540df9bbbee1	-0.436680059808988	0.31259079652893	-1.34976977725715	-1.17240965471145	-1.70928347125238	-1.49565412074473	-1.55318496244198	0.219043481946749	-0.0721621979839376	-0.0606171167760811	-0.133282752572452	2.51100058178246	-0.327763583319246	0.88890601407549	0.669715027612748	-0.142660715151633	-0.0316579974277927	1.52012488078783	1.10044129891813	0.230706413092668	0.76085170044838	0.625841140015101	-0.753013126819467	-0.956598071641236	-0.347348212530655	0.987579584118169	2.05100428617718	-0.408754029112379	-0.479788517727783	-0.908503684906603	-0.140918476166658	0.77168128929595	-0.169435966447179
1328ddadac3f2d08eb25e79a18f7e574	-0.726854934203525	-0.726857894664684	-0.726859513032097	-0.726849496215274	-0.726850687062257	-0.726859513032097	-0.726859513032097	-0.726859513032097	-0.267314684389011	-0.726859513032097	-0.726858729142302	-0.399251032465586	-0.636663498435037	0.068102862594752	-0.58743536414923	1.92669800836011	1.6131764311036	-0.296818607273677	0.0388079654547796	-0.726859513032097	-0.726859513032097	2.18824428217736	0.379394926638792	0.459602788800279	1.4280061301228	-0.726859513032097	-0.726859513032097	1.78682547984873	0.822401537683269	1.92812392246825	1.17782523610093	-0.726859513032097	-0.726859513032097
c2ad34addc26f871b36e062f6816d89f	-0.782184319194699	-0.782187786937324	-0.782189682488656	-0.782177948366071	-0.782179343712112	-0.782189682488656	-0.782189682488656	-0.782189682488656	1.07192916603725	-0.782189682488656	-0.782188764350358	-0.394856077719914	-0.653822947349927	2.10233959799401	-0.204760247225081	1.44867596263522	1.35760073847823	-0.398870027218984	-0.0937712264544286	-0.782189682488656	-0.782189682488656	2.08902637913218	0.161839888534474	0.22362663088286	1.21898762183701	-0.782189682488656	-0.782189682488656	1.51267838805302	0.62478440574446	1.61346369093332	0.836132725642079	-0.782189682488656	-0.782189682488656
476a27c3796dfc1790e181f789663a33	-0.437335497248226	-0.437339959146123	0.418893474968979	-0.389698755218042	1.01498686217417	2.73702576430624	0.11054543545622	0.849221382320327	-0.437330308906788	-0.437342398092382	2.49573616201093	-0.437342398092382	3.40809698440022	-0.437342398092382	-0.437342398092382	-0.43733834650101	-0.437327105579179	-0.437342398092382	-0.437342398092382	-0.437342398092382	-0.437342398092382	-0.437318886729322	-0.437340775435621	-0.437331001767986	-0.437340413785503	-0.405865112441042	-0.437342398092382	-0.437333719153757	-0.437338645897382	-0.437328333355183	-0.437331310818162	-0.382028526296801	-0.235497784525522
cb8b8a6ee6bcfa115f8b24a45fa1c12a	-0.271964022776272	-0.935316496570679	-0.965503154534093	-1.01045657793825	-0.820637041976647	-0.960480341073242	-0.959304630966555	-0.852329595494432	-0.349759618706307	0.094220431010061	-0.278168346632481	0.214495886855741	-0.36430057406771	-1.23275513981797	-0.456728376448876	-0.46540053632773	-0.157186451142967	2.50843806987255	0.53034506644361	1.5557488733635	0.337755147751925	-0.960100293403839	1.31051248401251	2.37272420416668	-0.0875951609469102	1.29363359360652	0.777427279129831	-0.588340571221418	1.35855049977316	-0.249676484371611	-0.47960897759544	0.866688571670487	-0.774927715643146
499f1c879aa937fd84ec658999d69c43	-0.835548679252093	-0.684618958155877	1.99795046166403	3.51264405419019	2.2938559788285	0.240877118482975	0.0208783667095031	-0.60757234329825	-0.647297806921774	-0.402814326133269	-0.746608977022273	-0.365206499381114	-0.00571727147334319	0.338687143501471	-0.709789756235569	0.400297584501978	1.246587893472	-0.501319074066762	-0.654005599455454	-0.636087098840022	-0.688415285886398	-0.665517836426524	-0.239085205141624	-0.724729020031281	0.0948963116458006	-0.40637336017561	-0.772348996890217	0.889757154866712	-0.629587779835564	-0.0691933367040499	0.321555867808244	-0.678896378719914	0.31274565437558
405cffae21e3269ae7c795d56acdb42a	1.02310380373887	3.1639486782415	-0.919170144943342	0.906873779130085	-0.763122821200587	-1.26373385614794	0.52444269404398	0.146095332018874	-0.300133228513666	1.18402165777374	0.341218576695758	1.55412643728709	-1.06731215342963	0.36552869718679	-0.90296919580578	-0.475884455434914	-0.0963583642322381	0.132127989710037	0.0246998564829648	-0.473986815273999	1.46451224216176	0.607596494164429	0.954336559429528	-0.625276212208851	-0.157837979527427	0.111259347444531	-0.304050528519234	-0.993017024291872	-0.158756476383511	-1.41161591595973	-1.05715432476743	-0.0715897100721953	-1.46192293879757
daae43be6cf06991f62a085ba8bff3b6	0.479991397240245	0.431475336165489	-1.31354710538089	-1.58763565420293	-0.863265986608467	-0.694985543225383	0.769611525025542	-0.8770803494539	-0.896116066958875	-1.29454823914126	-0.684989014040845	1.32139813118967	-0.817983479512824	-1.54458693491706	-0.595566729341838	-1.38073689179093	0.608437802112517	2.04343898277202	0.149035470626494	0.985610968030998	0.255507737423483	0.0738829743444984	1.33884257746534	0.587761823982778	0.848650316055038	0.734966880496678	0.370838548959075	0.46757560669856	0.978515153530881	-0.903264269554388	0.758177263399631	1.34863994364312	-1.09805217503246
d27a7938be9be7fcde444b0d8a1e7f84	-0.927960693425396	0.593933076448315	0.290459206451077	2.96796190266671	0.94320000433061	-0.399789440236689	0.131730810098148	0.916119412848966	-0.319695109670096	0.294027969618702	-0.748766446230075	-0.641262685830344	-0.330987761994224	-0.565069770813641	-0.753235036871284	0.233806988333402	-0.0811456771513084	-0.985921763180101	0.252750151353423	1.93423015600475	0.248371114353972	0.434312960806725	-0.220631996525449	-0.689240104301826	-0.713352746356596	-0.334631569246169	-2.38787149094432	0.0258036687559644	0.804663405217255	-0.580859136358663	1.71401385204207	-1.37741387966217	0.272450629468262
1930d2ae4018583d606e705beea31bd1	0.735900243011216	0.48951396728287	-1.02178760918941	-1.02174437801625	-1.02174951730188	-1.02178760918941	-0.946380067265233	-1.02178760918941	-0.186736754824195	-0.312369041695165	-0.844995389392431	-0.850582006514332	-0.900747484033732	-0.470287330400425	0.469781303540559	-0.329068437801803	0.59743836389681	0.990526299659696	0.274871364988161	1.39957310419303	1.09928364460532	-0.47162209660253	0.503055335179973	0.235241692617373	-0.233684042395743	1.98344785110061	1.44837453329045	-0.534909254367199	-0.658410077839705	-0.949255320665676	-0.690077029491785	2.96458009615705	0.296393256653191
f72d0a81bead898b2fa029f7a11f28c7	-0.0605358381303774	-0.496397222598472	-0.978420308390868	-0.978373811499683	-0.978379338556245	-0.978420308390868	-0.978420308390868	-0.978420308390868	-0.692224736358222	-0.304353574657543	-0.978416669362203	-0.978420308390868	-0.927441814705042	0.844132955277519	1.31337808523388	0.543230518370561	0.255649149093734	-0.580591320735344	0.122752366905431	1.08584625460699	0.0577429952795243	0.537289307414491	1.46587315084746	2.67543517603732	-0.0673351265454392	-0.498551543801753	-0.417161138522393	1.69295330981747	1.53632705077091	-0.245331323423968	1.41292152238876	-0.665753530612119	-0.760583310580899
72e530a4206f2e4804d502f4dfca8387	-0.564815005470705	-0.633171576026493	-0.218850880743591	-0.622915054985677	0.0899176696491437	1.29516527225078	1.99567441588601	0.752647630482044	-0.778923431373536	-0.816761924138214	1.85060989666093	0.276905577625646	0.968579648508948	-1.04566196589557	-0.325822164857423	-0.983325036747294	0.854195843746712	3.03478860436988	-0.601112964379396	0.317997863164517	-0.455083845801562	-0.938169306427814	0.259694058383876	1.30613958367781	-0.66245153795986	-0.132675745717824	-0.528504747528236	-0.485286468643843	-0.389362778934221	-0.880656374671015	-0.985672238710568	-0.209522927697153	-0.743570087696292
0ebb2cf4a2017aeaefadf9ae5062eb62	1.50913813506694	-0.383436585951965	-0.902880271194918	-1.59323336349201	-1.86500311470491	-0.39818643193315	1.32367916912572	-0.396852356501081	0.272715025034992	0.695615772466189	0.00107217644485325	-0.435050717339069	-0.90963469082982	0.444606218078843	2.40828961302387	-1.34575021470433	-0.979856273899957	0.432007498797582	1.69675165486022	0.947409200750887	0.333576309277134	0.735263177621126	-0.640344439304255	-0.261880129959139	-0.154247526825442	-0.195809591662321	0.141708428363149	-0.283253968843585	0.258840569897767	-1.28181705921763	0.602178207861702	1.33240742729288	-1.10802184760027
e4597f1dce864c29882fa64f616d1a6c	0.302744514182515	0.678309771901019	-1.89042394894558	-0.970407641039729	-1.51411113768117	0.797580387408167	1.11537053476716	0.340961798497947	1.79184656262951	-0.871187995766146	0.0422633064103473	0.708288618472768	-0.822244924409929	0.0344940499024475	2.37491084887548	-1.15733208942292	-0.470549743094525	0.266502113843623	0.657703881685062	0.893766467047018	-0.353916277707773	-0.103917181222086	-0.150490400072787	-0.433147448221031	0.16369939610499	1.07538015047192	0.70048396461116	-0.863689090263139	-0.751008331974505	-1.33734709566953	-1.06108415637576	1.50330624897032	-0.696755153914836
129500150cad877075ed12b0c9424282	1.70425265886651	0.387425490483446	-0.745153727109301	-0.87752079877596	-0.168070436245531	0.653725149258955	1.63700437708326	1.07415019540056	0.841518323429861	-0.173355661932599	-0.177024697069239	-0.714365130744816	-0.761540533520679	0.0395114262007482	0.699870454305697	-1.19143244492309	-0.921646876557032	1.07014966681946	0.947178728588629	0.830688762808556	-0.259546239034738	-0.715033708238987	0.262495731223895	1.32742349659279	-0.650234167086696	-1.10251135646994	-0.711105315942911	-1.17242600687439	2.27215535693878	0.288156545539691	-1.12287975931521	-0.942124998530295	-1.62973450516942
7d02f99e2ea00512b055a4e70f84c18b	-1.08313808818272	-1.08314745687312	0.381500825166913	1.35491641376861	0.950411793313714	1.14211644464448	0.554526868866147	2.15035399195769	-1.05195589356115	-1.04942365462781	-0.439639722724774	-0.35561016429053	-0.30088349297086	-1.0831525780546	-0.42382385062741	0.745472899226381	-0.472148811010008	-0.113857325457055	0.0835910959309718	-1.0831525780546	-1.06151925532217	1.58466078855506	1.42224094199886	0.511891009086377	1.77539141632905	-1.0831525780546	-1.06554257543575	-0.369960260680736	0.456158743266764	0.208624779014051	0.8457055202072	-0.964302667349785	-1.0831525780546
57d7db0d1473a71e4955463f11cbbfb7	-0.734704140876013	-0.805548608950265	-0.604666295836671	-0.922656599254611	-0.558620387366468	-1.29187849195584	-0.874630103552465	-0.978486313802927	-0.614547863470542	-0.810435012389426	-0.307216666539147	-0.239638474544357	-0.590308242414054	-1.00794393273858	-1.29187849195584	-0.338341613665768	0.255483916792379	1.51759868364861	1.2365519735782	1.13099705747218	0.581926273507606	-0.0668733285023449	0.80606339867642	2.48983615280605	0.12323150672116	1.33608756530247	1.90747701445218	-0.538023757054887	-0.123890801146959	-0.21214678580492	-0.7982395144286	1.3337776226899	0.991644260603532
26d6bdf4eb4f1daf826c5efa6f103407	0.822778031932383	-0.146312805048946	2.0032378455456	-0.405327940316778	-0.101587463555875	-1.13401205280069	-0.408489027848784	-0.347468963169904	-0.893793807357996	-1.21629016542955	0.991721595286284	0.54405865412925	-0.180587959163355	-0.421015512424117	0.694799074339078	0.396679363480252	-0.938761522776283	0.082838028444992	3.47466300909195	1.42730515274448	0.886162290288172	-0.761151042873988	0.212781511187118	-0.383996833371904	-1.26362716914206	0.201200165677335	0.0388202929465608	-0.503567251970382	-0.769071905823186	-1.23126568445725	-0.749190571551504	0.118643887632259	-0.0401712236431519
91c6bd1773aaec302882b43aff6babc4	-0.677831200583505	-0.759445074082637	-0.609522608031847	-0.84414089926796	-0.38290795068296	-1.28261028333393	-0.907343236201663	-1.28261028333393	-0.64808941092242	-0.859037741112908	-0.377272430764343	-0.437449242504887	-0.537321129832604	-1.28261028333393	-1.0354871213665	-0.341131612625812	0.241723331298088	1.51529209163588	1.0649653048136	1.44614895016965	0.405977170772933	0.242883819626231	0.656991034010271	2.34821307299942	0.175927409034035	1.05960374680384	1.97798583007539	-0.435629220691112	0.0231451254059937	-0.309863627058237	-0.716644731186203	1.49896407809689	1.06912712217517
020f48a69f9bf40e54fbac885f94695a	2.08571803997476	-0.512926090176557	1.39731395467003	1.09744670265077	0.0835012484592641	-0.565513274430382	1.96350316886077	-0.565513274430382	0.163364091038523	3.81157654455272	-0.565511074768461	0.549939950392471	-0.565499759777891	-0.360846826935159	-0.0454777767421462	-0.565505636020965	-0.207040260166508	-0.487865997796297	-0.565513274430382	-0.565513274430382	-0.565513274430382	-0.565468844570873	-0.394882182783283	-0.189589905317643	-0.110872060636093	-0.565513274430382	-0.487257173512147	-0.565496905690675	-0.421998684565564	-0.0165259742308067	-0.565492351465182	-0.565513274430382	-0.565513274430382
2eb2fe0471e37d54b5e1c47660220ad6	0.0616506127772119	0.495964252181633	-1.16938718103701	-0.978990588869158	-0.89867744856507	-0.31858774715023	0.972649701311132	-0.525919050080321	-1.06156167885131	-1.25934175211566	0.357481779012454	0.000973621842648967	-0.243898256927148	-1.55946042434174	-0.124020410688807	-0.652570697037748	1.19669208149895	3.52287577361151	0.02690310115945	0.25227569251559	-0.110906773323974	0.193682099089733	0.56180263333168	-0.411948034073122	0.0450627314253189	0.924629542041832	1.00426147521259	0.697488549716203	0.363683174897875	-1.54461710323601	-0.575442239279167	1.27000237261389	-0.512749808663242
c1def48b42e159b33dd366fb124ea638	-0.750458923915646	-0.969369949290762	-0.135043745407376	-0.552020750311943	0.404368046023185	1.0894962824314	1.95099203167376	2.08717551582406	-0.879076943152996	-1.03306443123248	2.04296214739658	1.49925890646625	1.48142609090331	-1.23680623972832	-0.634881681439011	-0.860125081515505	-0.325078692812963	1.33596108734172	0.0294932107373065	0.153835977245412	-0.170482684554616	-1.23668485370942	0.48596776876124	0.509367924264985	-0.354116406276414	0.163042000115566	-0.228376597751518	-0.777299344259286	-0.142045356200076	-0.689502723957644	-0.947661062212358	-0.154847391486681	-1.15640412996976
5aaa7f98b6c0b334e8f67ec73b468d71	1.09446464097201	0.780680803006037	0.911158653054499	-0.490593216311266	-0.583783597515022	-1.03531974527824	-0.904971038311756	-0.406803801168684	-0.497048366101635	-0.995953744870266	0.729634909539792	0.564674417334463	-0.453438960863267	0.209703504306099	0.993923301275051	-0.174414902663781	-0.8274033070463	-0.422909309196478	1.92165795052381	1.66418764931567	2.26543337836399	-0.77675892939462	-0.0320627699214782	-0.740234555734295	-1.42908306003431	0.796004152649573	0.787904417301355	-1.00913888920897	-1.02875600069205	-1.50992032512309	-0.936680084757223	0.615844116296348	0.920002710254012
761106f9ba9bdabce9e9b1417f097101	-1.15733175951404	-1.15734969212406	1.54810426768307	-1.08544342478348	0.82340649329125	1.25994396940451	-0.203963917299562	1.572780530486	-1.07522643817728	-1.15735949490327	0.120070193500441	2.26087994517207	0.724401897881123	-1.15735949490327	-1.15735949490327	-0.428617188783878	1.46648089355135	0.124173962438667	-0.633902069740217	0.180095652799144	1.4697159917571	-0.0940025569105142	0.706891556826663	-0.886626409653545	-0.345916040929874	-0.941382395571716	0.716690490956196	-1.03590952184047	-1.02647567061633	0.48956754745294	0.113314754241955	0.0180215117863669	-0.0503140885740646
ed78bbc1db0ff176088ec1eeb30cde95	-0.397268419370653	-0.239867299934012	-0.838734460704871	-1.60382409297452	-0.123162587631341	0.754901529332898	2.04203132789267	2.56626408944828	-0.775804658412192	-0.732733740134189	1.21247567821939	1.60906828763665	0.114319026401943	-1.6026391069744	-0.324231112637643	-1.11333262340502	-0.0654062930951541	-0.0884176974784312	0.992955275089314	-0.0654630407591905	0.247499409692932	0.33806411790785	0.845871299417649	0.311014671550565	0.604221437949701	-0.994516538128837	-0.339879675794708	0.167790444569514	0.609296305196548	-0.273240282523728	-0.0863966258009335	-0.975902001310501	-1.77495264323557
876295a7cd8394f70f60a6fb62837bdd	-1.05964057977926	-0.880405170022562	-0.685980451759234	-0.759732047531614	-0.695504120079587	-0.124188132232993	1.04442655735172	1.67870645971347	-0.858993968506536	-0.329398208763125	0.395796951161677	1.91469730965952	-0.272663284702161	-0.849751422734034	-0.190970404107259	-0.500134042850458	-0.0788796438607923	0.397445691680183	1.48371166018942	-0.94203053954361	-0.6585142606438	1.59847678546888	0.0267789686520149	-0.307560662982587	0.644463337221909	-1.22392653889741	-0.732469153967366	1.01816169919979	0.426154944971478	0.205398984879805	2.50747494793268	-0.813347950981044	-1.37760371413712
d04b16de2b3bfa84754a4eafcfaec69a	0.762222648571669	1.16244740924906	0.104450196965987	-0.195926308233766	0.0737520708939316	0.958594941793499	1.54426214382747	0.836994236798991	1.617332820031	0.708957713133429	1.19697887785005	2.24075654927635	1.04927402361558	-0.0951777898221848	0.0165956473472754	-1.09416766708245	-1.09413272790642	-1.09418023601845	-1.09418023601845	-1.09418023601845	-1.09418023601845	-0.22847384215351	-1.09417520565637	-1.09414484888811	0.162135130688501	-1.09418023601845	-1.09418023601845	-0.00957811563286396	0.796321182211061	0.492851741096988	-0.0647089398275652	-1.09418023601845	-1.09418023601845
9b4036adb487adfe4ca484346b5b9a7b	-0.540331794468382	-0.540390089261168	-0.540421985060403	-0.540224943674383	3.38084504128032	-0.540421985060403	-0.540421985060403	-0.540421985060403	-0.540264148980614	-0.540421985060403	-0.540406533149155	-0.540421985060403	-0.540327139061396	-0.540421985060403	-0.540421985060403	-0.540367669798745	1.84030532131876	-0.540421985060403	-0.540421985060403	-0.540421985060403	-0.540421985060403	1.93916800270562	-0.540400244018162	-0.540269091131242	1.00943870517769	-0.540421985060403	0.894962609013535	0.609674440707122	0.753112433579255	-0.540233140688494	0.809384799424263	-0.540421985060403	1.73223123187082
2f806cc7ee628e7d22e255b5f881fd06	-0.30620107522898	0.192050012476591	-0.319144452733171	0.245056619725171	-0.205632252459847	-0.240019451117565	0.0667024806966618	-0.613306937910439	-0.143787196023606	1.4295686204744	-0.942219056813546	-0.112317900779412	-0.507834789401136	0.897389331956451	0.793889129834529	-0.546866165632634	0.45718111273007	-0.942224136929291	-0.872965231061378	-0.421776157943055	-0.0287827648059582	-0.509080339936066	-0.679306991830651	-0.94217430596645	-0.1619671905069	0.580015517690396	-0.136576186402969	0.397528151110764	-0.713712812581282	-0.289378304089385	0.543842013248881	-0.540031977677964	4.57208268788777
5292f29cab69c370997bcb039ef68d64	-0.344923228999175	-0.211422444118429	-1.02695174053304	-1.1250570867816	-1.16141049503803	-1.22537949401311	-0.97074163930621	-0.808382322550163	0.24689840249141	0.919713705327625	-0.948771553304556	-0.509591837880811	-1.06579701025426	0.742848681331278	1.10283725760519	-0.31378423683261	0.417657998309383	1.07060664348678	-0.439035695468219	-0.653210560477498	1.04157311261049	1.30540735692401	0.309756228375019	0.00424718888736689	-0.661472241984587	2.68366723157824	2.06896296547649	-0.376296390450555	0.0598274399806015	-0.49586408104113	-0.86514981519296	1.43932204688746	-0.21008438504442
2d3c374eb6cea127942bd0177b3bde09	0.990433736968141	0.0195623591780668	-1.20167089409312	-1.20159579815098	-1.20160472151439	-1.20167089409312	-1.20167089409312	-1.20167089409312	-0.294511631651246	-0.207455992163067	-1.20166501541236	-1.20167089409312	-1.11004200161219	-1.06456144497018	-0.527620833317619	-0.59254710194611	-0.00597665121770405	1.65699126672375	0.753755004021995	0.940664631282497	0.207103394354644	0.30457417203583	0.681186946677484	1.50424482376717	0.75366471496243	1.04392538808403	1.58039020933872	0.493028266989131	1.54164267985222	1.24555459015731	-0.219413686863015	0.631270870064185	-0.712643705173146
7adfa4f0e342de54304e1c50112cd387	-0.665268351105156	-1.2338174709897	0.0271605399362019	-0.354549684682849	0.0680887436442238	0.34474976586225	1.06335142318379	0.0661918302638534	-0.632347358611128	-0.794470989681129	1.76513894816272	-0.0463598227014046	-0.412852538540052	-1.50954454364382	-1.29533571998439	0.143916850835148	0.185365860864405	1.0788779105299	3.27291043681596	0.989672169449836	-0.856480844164175	0.720207784681101	-0.758049375027578	-0.138845236039646	0.21531784162898	-1.05513568258701	-0.864875617782584	0.386544130286684	1.44388640259936	0.202049695009483	0.0607370201385738	-0.245404757069287	-1.17082936128256
3ccdc88a8737c3ac98bd0a40b1b93bf8	-0.500070660857178	-0.500080617542778	3.92933870485158	2.02900111420087	1.41426489626863	1.27936507848154	0.411227663588555	1.25873347720663	-0.500059083618358	-0.500086060139469	0.500744467706192	0.360731593245693	0.818610629397477	-0.500086060139469	-0.500086060139469	-0.500086060139469	-0.500086060139469	-0.500086060139469	-0.500086060139469	-0.500086060139469	-0.500086060139469	-0.500086060139469	-0.500086060139469	-0.500086060139469	-0.500086060139469	-0.500086060139469	-0.500086060139469	-0.500086060139469	-0.500086060139469	-0.500086060139469	-0.500086060139469	-0.500086060139469	-0.500086060139469
9c6688b479e664fa9d070647653e49ed	-0.376744427935426	-0.376756131117938	1.64387851115242	5.00351424441632	0.959808266801046	-0.246679304235517	-0.262783165944037	-0.376762528632893	-0.376730821009287	-0.376762528632893	-0.278673310997867	-0.376762528632893	0.00856979573059223	-0.376762528632893	-0.376762528632893	-0.340412171202226	-0.376721866643313	-0.376762528632893	-0.376762528632893	0.0147193789117532	-0.376762528632893	-0.18629981828163	-0.37675822150356	-0.376732238276095	-0.150340887915713	-0.177475622426304	0.659221639673977	-0.376739469867423	-0.376752565888083	-0.376725115661572	-0.150154046425908	-0.210948870790779	0.118816448499704
208a08b90e13b04d2ef2f584535a2d39	-0.649819400485321	-0.197208125385306	2.5812158760914	0.950470558150946	1.19704341261458	0.401478526815669	-0.410596803303981	-0.492703380403719	-0.431084301699016	-0.498528107231702	0.879282359994904	-0.716622085516692	0.477698747002327	2.88904437299635	-0.62153466508039	0.321292895879737	-0.577395296535525	-0.751181889410421	-0.717195136604656	-0.700061982032215	-0.500287739085785	-0.691651545580102	-0.751173551067198	-0.751123237983346	-0.587974297933043	-0.619650972944017	-0.714011140131232	0.473971396045033	-0.638196386300783	-0.186802777438023	0.571357745484979	-0.704525498649932	2.16647242972648
35f3ce6a0ee2829e6ccb193be3c4338b	2.6494717384043	-0.191311376195973	-0.607597509864771	-0.345352495744354	-0.607559364259357	-0.607597509864771	-0.278636567166162	-0.607597509864771	0.0370231264273636	0.0337416366787701	-0.6075941217567	-0.553737021409908	-0.607576695373065	-0.445397624479098	0.404093103892508	-0.531693803712499	-0.564536969370756	-0.462413931528577	-0.545968438893494	-0.283468399294465	1.89560559859224	-0.365605029988715	-0.55083428257662	-0.563377551751746	-0.410249282792058	0.365609062248161	2.98776964006919	-0.401672387750423	-0.538728193974561	-0.5833475983116	-0.567889729180723	1.766922846567	1.68950664222563
33ea9f7df7a02a6f06fb9700ed440401	1.16837736587946	-0.505851953862247	0.0286879574526733	-0.537401433666511	-0.396015066130225	0.796130234717364	3.49844850908226	0.932953007388072	-0.137566940190196	-0.219491580974864	1.85516393014209	0.226530323038017	-0.0154223104967264	-0.136685261234682	1.72730766888234	-1.59238021545773	-1.01851235085464	-0.599968708197333	-1.12513967517039	1.01925802666084	-0.0290695001128559	-0.777128790439931	-0.809222466520276	-0.432558980154174	-0.745414599280679	-0.140886217923046	-0.117131248652794	0.247013513910254	-0.351723443758972	-0.879130423508612	-0.567397637440472	-0.239598183956487	-0.126173549169528
5858157a5f3c4bdbc235927eae7ff303	0.413935640280983	1.89500641019708	-1.42394317093536	-0.0345823461789786	-0.733018110012467	-2.01665508068016	-0.639432918447428	-1.46834475369422	0.060178816974342	0.606878776831923	-1.18863329641294	0.0463794206730146	-1.78264690749054	0.39162440816464	0.237180077270276	-0.187933718086927	0.7455461718219	0.460659155680115	1.0914528926186	1.38581983825836	2.41050435994371	0.231943861627209	0.666673032914021	-0.0630696261745703	-0.0466811607427948	0.386104382854251	1.03807169267366	-1.13537125516341	0.0885809532676115	-0.174406352553064	0.177002233402822	-0.805401398796321	-0.633422030085339
ef3a40c4f26b5019887d73ceaaab84f2	-0.354739416834345	-0.00503809431404758	-0.354784827947805	-0.354685559941615	2.42608571991409	-0.354784827947805	-0.354784827947805	-0.354784827947805	-0.256167688453637	-0.354784827947805	-0.354777050372625	-0.354784827947805	-0.354737069862225	-0.354784827947805	-0.354784827947805	-0.354757613513585	-0.35468198408658	-0.354784827947805	-0.105575335133859	-0.354784827947805	0.53389437091242	-0.354626533947559	-0.354773935036713	-0.35470821777021	-0.354771505814925	-0.354784827947805	2.81552072545978	-0.354726508894125	-0.35475963140205	-0.354690199851607	-0.354710283246623	-0.354784827947805	3.8148437475637
596f70447030c8a5e3ddf2bd3eadafa5	0.748216437789406	0.654036734213088	-1.12780994009263	-1.12770450933998	-1.1277170350516	-1.12780994009263	-1.12780994009263	-1.12780994009263	-0.711459068067381	-0.913836056405669	-1.12780168579009	-1.12780994009263	-1.12775923869328	-0.0146259362617791	0.753532617624566	0.627907554855012	0.387194321388401	0.592138775757291	3.76513296267063	0.341879692335981	0.577051696039784	0.578418528556637	0.119357526918504	0.678857698404112	-0.0719206034616764	0.404313406569231	0.42812277445522	0.195084066265952	0.072994381395773	-0.158739972345464	0.639621594344499	-0.21410418204824	0.670857218344227
7421a0056850e30172e2c541c9215c11	1.57920155284345	-0.182894920338139	-0.613724664267253	-0.613647199171325	-0.631293055940737	-0.371725196708773	0.319875425527191	-0.333928793444442	0.170218710536983	-0.384923085410072	-0.000261369649690944	-0.0248527945222113	-0.379002386472906	-0.336303036520187	2.6494287666678	-0.670703913973254	-0.697092856854387	-0.604310452493673	-0.598543678488709	0.49929541188318	0.331220351909334	-0.697048863888632	-0.508385328149542	-0.505140584521116	-0.658756311126307	0.908012766542882	1.67950392268806	-0.697128172662054	-0.445228888590506	-0.697099368504632	-0.606380714532913	3.43269535138226	-0.311076623749675
b8455681fc92d051fdd023aa62417fb3	-0.455064691967866	-0.455091662028998	0.0581080467879419	-0.455015158318889	-0.252746488726463	-0.0674223812393742	0.781205975124942	-0.455106406349186	-0.455033340194913	1.68558507577775	0.0201497712789576	4.62038155666843	1.66726823941558	-0.455106406349186	-0.455106406349186	-0.256949302196008	-0.455013065718123	-0.37106256245676	-0.357673600614457	-0.455106406349186	-0.168096435961117	-0.31315109490123	-0.455096512417946	-0.163919649803447	-0.25144115378489	-0.455106406349186	-0.455106406349186	-0.45505345779657	-0.309864486149833	0.737762753073151	-0.455038742784142	-0.231982786621422	-0.455106406349186
df0e3d38eec730326754d8c17a8b8efe	-0.700864067806725	-0.639204660015183	-0.231622249397645	-0.69258904162288	-0.106110868808727	1.26506357037009	0.309177788609806	1.97548527132705	0.823085886197041	-0.182062825721357	1.24195793492032	-0.69621557625536	0.533744293472358	0.128137975399354	3.45614686253997	-0.770551422677885	-0.770501673884441	-0.770569322474747	-0.770569322474747	-0.111375798422284	-0.105606965621953	-0.770465192890088	-0.770562158115252	-0.770518931105581	-0.770560560337961	1.07873755855074	1.07867810338175	-0.770530963280394	-0.77055275017751	-0.77050707641821	-0.770520289223249	0.693664428013955	0.128182043949758
2bc5942b5fd0f8140d1eaf96be69ff40	-0.308372108434286	-0.214936092798765	-0.429289795606455	0.26100403066955	-0.261786886814022	1.62593266295553	3.82938596878189	1.02645124821614	-0.831958326993004	-0.85872269606191	0.0638232772599664	1.35317718128824	-0.0211996500510863	-0.831166071844389	0.336758102262823	-0.649146891160798	-0.449998497140929	0.300133639057139	-0.534457264790223	0.119785610706942	0.268708041674223	-0.690969044447918	-0.273172345703622	-0.385094728002362	-0.995460071255393	0.501554966328347	0.181028920995902	-0.763184263504144	-0.796684716797353	-1.08763834143173	-1.36765755011578	0.915439078783398	0.967712613974074
6c8fd159b1fc28483e06cb2d2c7b1597	-0.268211767062404	0.232713211288031	0.47356740056616	0.0793305737856419	1.75075469134684	-0.92114070949641	-0.258066760630944	0.218928038789762	0.0139772295703672	1.44220576135394	-0.921124658713501	0.891730122220133	0.778396028371215	2.28087908002245	-0.49851409747579	-0.921084978557519	-0.920930151954963	-0.92114070949641	-0.92114070949641	0.176899279688595	0.397944653919748	-0.920816698426323	-0.921118399886664	-0.920983848743719	-0.921113425228206	1.72719824437731	0.583310209943163	-0.921021290429856	-0.92108910809101	-0.920946989299731	-0.920988082763402	1.3388232821778	1.53277457833209
0d29a1eb24f264423251f3b2a92f7914	-0.610183742661987	-0.345041107926229	-0.643964025010484	-1.28931412592384	-0.437510920917101	0.835471923662594	1.77920646692109	2.08392579349897	0.209101504360429	-0.237624920927645	1.34770600960727	0.596835130585697	1.17562827015119	1.37142391320544	2.91644819434254	-1.0540032506324	-0.870872354232265	-0.709092120286872	-0.661998360421189	0.184333965665388	0.287408326550092	-1.28923928543027	-0.708911314027353	-0.357416185642507	-0.468962157996476	-0.580906054798002	-0.341729488457444	-0.102327627411872	-0.430284513201799	-0.443897762395057	-0.0416412711650417	-0.461262383771649	-0.701306525313219
a7b2ebeb585c5a9437a670f13d3234db	-0.744528508409754	-0.740362645357698	1.47815659463145	0.78745895605493	1.37354247970049	2.61240355411356	1.90307835613764	-0.00767393087761437	-0.385917686252646	-0.385326735552671	0.059646485056889	-0.235861717493468	1.85205113284872	1.89320504919866	-0.220049241594329	-0.672057966501783	0.170632514275223	-0.779313828927008	-1.02327291688571	-1.02327291688571	-0.802141232070315	-0.445310377182	-0.637565164545847	-0.77538817919278	-0.128814936602888	-0.685393771683686	-0.888292176327766	-0.294187558335081	-1.02323221547316	-0.209254543142625	0.551520761562908	-0.726812381178948	0.152334746893004
3b464b2c3ef760585938966db87f55c3	0.161110297739174	1.44000895232391	-0.464798431689584	-0.464761179803651	-0.464765609402305	-0.464798431689584	-0.464798431689584	-0.464798431689584	3.84292821068109	0.934894794397824	0.830924218637708	-0.464798431689584	1.25145688941074	2.59440558127098	0.291994097071667	-0.464788757561485	-0.464762034288384	-0.464798431689584	-0.464798431689584	-0.310554192504879	-0.464798431689584	-0.464742638142887	-0.464794551118956	-0.464771278105081	-0.464793687622769	-0.464798431689584	-0.347102147434881	-0.464777730246485	-0.464789465956967	-0.464764994962782	-0.464772025796151	-0.464798431689584	-0.464798431689584
09d3418ddd00d62455350795193f724f	-0.0947368692395095	-0.119178993709474	0.0843603369177611	0.654571962476681	0.0350681854702536	-0.557325356937623	-0.695520511695775	0.472546657548207	-0.656935238022182	-0.377007193220359	-0.708653089746273	0.417797564497883	-0.552894122754772	-0.876264546450621	-0.822070487457184	-0.0699522043613846	-0.919539918776815	-0.742070035859609	0.11065207522198	1.66693942168343	0.483186763918146	0.177390572429815	-0.870375153624883	-1.53822385355989	-0.692812252151384	0.259244183157699	-1.01741294801947	1.1697886069808	0.071060649175784	-0.319911463116238	1.20731346012593	1.03111026375566	3.78985353534341
54a43d2113c13203e813d22b17f3f370	-0.501470491203461	0.238167246641644	-1.10501239499739	-1.10488621331504	-1.10490120323094	-1.10501239499739	-1.10501239499739	-1.10501239499739	0.514186712331495	-0.17445208832112	-1.10500251560651	-1.10501239499739	-1.10495171285612	0.753129871330959	0.335267206758363	-0.81976583388081	0.206003829362446	1.35759799094248	-0.0687640653458272	1.00980736192009	2.23338761233329	0.702012915184818	-0.169917440232105	0.751265761389913	-0.650891238226171	1.47540614793737	0.819632768933088	0.763797361783532	-0.558682568273153	-0.708709715053156	-0.554134869892327	0.939388204385909	2.05254093918828
811f358e4e89eecbd75298ffce878cba	-0.742964756882795	-0.743032144222949	-0.743069048290177	-0.742841508244596	-0.742868384647055	-0.358372454557257	0.611386356063874	-0.743069048290177	-0.742886710932391	-0.743069048290177	-0.74305116716005	-0.743069048290177	0.167606381105236	-0.743069048290177	-0.743069048290177	1.07367968718799	1.51534472616614	-0.743069048290177	0.506748132250308	-0.743069048290177	-0.743069048290177	2.52563224263929	0.791079097221349	1.25712493780134	0.686929383558644	-0.743069048290177	-0.743069048290177	0.633726944818985	1.62319314000092	2.00379036294476	1.07967336266055	-0.743069048290177	-0.743069048290177
a0814dbcfc36b32aa80e5af6bca83748	1.91909897024696	0.991765974007315	-1.23151077995567	-0.97492538099082	-1.03876605504335	-0.659916362829882	0.262984949439163	-0.358446178519301	0.599964271186242	0.0729508537053814	-0.421248041242373	-0.239670665596538	-0.1140224037327	0.698147788335651	3.14728721578152	-0.662558470588527	-1.23136753208163	-0.846761532719239	-0.0429514181634321	1.7625115127658	0.954939929573892	0.689787715941857	-0.949669583564502	-0.805528005952841	-0.0578794681963029	0.18663798660457	0.204595207822543	0.335203977707036	-0.836417992240271	-0.951393047311763	0.887062326833207	-0.563636606661564	-0.726269154560421
cd3526e9ddf608ed31c4f3d648ca8034	0.198566710780503	-0.735166110611012	-0.798422508150378	-0.861469079080764	-0.739905870279727	-0.699160002876851	-0.278434028072808	-0.47588417788744	0.297629810777064	-0.420261372041263	0.945873020840489	0.0540612351716387	0.399292207314514	-0.862723638295059	-0.104806502003329	-0.615960058380328	-0.151975394472863	1.69006798381952	0.587228218065056	2.72812455368448	1.22812117371809	-0.713341271807939	0.0198058810315279	3.21604478782221	-0.815700813387804	-0.557838489111195	-0.0776699006202089	-0.629230112055824	0.512042677861523	-0.687843782681819	-0.608934918644364	-0.21426934664023	-0.827860883785412
cdb79eecfa38ac58e99bfdef45fabfce	0.0353222376672451	0.358362792842153	3.56207002448837	-0.136360170005411	2.4313923299935	-0.00310534650312112	1.21068963668919	0.719235344248458	1.19320179379505	1.47728576668748	-0.6628223527939	-0.51892719062055	-0.297793960049957	0.340069313331452	-0.0247412172986103	-0.662804967423535	-0.662736966137286	-0.662829466922571	-0.662829466922571	-0.662829466922571	-0.662829466922571	-0.662687211350884	-0.662819656395037	-0.662760540502828	-0.662817469532626	-0.0712666335933607	-0.662829466922571	-0.66277698111463	-0.662806779422833	-0.662744383166773	-0.662762406890808	-0.0593385584877053	0.388590886159814
b00c3432b2ba4ccb41e22cbf1f9e336d	-0.635561164861108	-0.635648166638342	0.507182999539384	1.66088969115249	1.57487693285597	0.782217739324991	3.78535311730728	0.792191198398818	-0.635460089087381	-0.635695743212334	-0.635672697078783	0.971054032542674	-0.635554205730516	-0.635695743212334	-0.635695743212334	-0.635616134309614	0.706377945040907	1.0775255504976	0.101375752763785	-0.635695743212334	-0.635695743212334	-0.635233639746261	0.174953129577142	-0.635471796895472	0.138666035256213	-0.635695743212334	-0.635695743212334	-0.635525204213355	0.439237860489903	-0.635419331681554	-0.63547786559377	-0.635695743212334	-0.635695743212334
edefa736f3fd701281f967fa8952b8f3	-0.492593681180961	-0.492609046201864	-0.389040280399971	-0.341824073669908	-0.153993276592438	2.56608725428697	-0.429126955815667	1.95743221034159	-0.422117020406069	-0.492617446361696	-0.492613377507226	-0.162818775713115	-0.492592451241352	-0.492617446361696	-0.492617446361696	0.193598727863869	-0.492563812312603	-0.492617446361696	-0.390760815165619	-0.0682711989466258	0.147485040360835	-0.492534877075046	0.753849623108088	-0.492577496509278	-0.39167999422167	-0.492617446361696	-0.456432962447647	-0.4014060792676	1.51707020495801	3.71193144278121	-0.343576204494041	-0.492617446361696	-0.492617446361696
99d1110a747f2702d8c86c94633237e0	-0.364730093091028	-0.364742280466416	-0.364748943211483	-0.36470770958404	-0.364712610604148	-0.364748943211483	-0.364748943211483	-0.364748943211483	-0.0397968907561922	-0.136131457654033	-0.364745715938408	-0.364748943211483	-0.364729117440848	2.55976486610686	0.899063373036678	-0.364737695205173	-0.364706428051825	-0.364748943211483	-0.364748943211483	-0.364748943211483	-0.364748943211483	-0.364683492756911	-0.364744441509236	-0.364717275132136	-0.364743437484972	0.131900554799285	-0.117311741109441	-0.364724837743866	-0.364738529699016	-0.364709821518832	-0.364718128084103	1.44053303767086	4.38031036112029
b7aa21bce8178648a994aa472efa61eb	-0.903522798732486	-1.01146814539485	1.80376750254392	3.31189953121322	2.23189726106382	0.77194859971593	0.0939180431337307	0.950846293078563	-0.763918388699109	-0.488091855976819	-0.267698203184191	-0.0163722198796743	0.329024380748536	-0.82753689700186	-1.23346406287522	0.351338167282882	-0.0811932255604924	-0.620257950894821	0.125326878174541	-1.09933533542629	-0.805670881103696	-0.0309387696239791	-0.451875060063229	-0.398408145556077	0.111087367441161	-0.997191021534175	-0.645855174094863	0.901152532797877	-0.503388245572231	0.30198080697635	0.498507546456964	-0.795901192780558	0.159392663327121
d409f0f157c2b27807fbae78d69bcc0d	-0.173879020403379	-0.174053226837915	-0.174148672216229	-0.173560747472108	-0.173630079031612	-0.174148672216229	-0.174148672216229	5.57048491750591	-0.17367745272668	-0.174148672216229	-0.174102422250114	-0.174148672216229	-0.17386516337837	-0.174148672216229	-0.174148672216229	-0.174148672216229	-0.174148672216229	-0.174148672216229	-0.174148672216229	-0.174148672216229	-0.174148672216229	-0.174148672216229	-0.174148672216229	-0.174148672216229	-0.174148672216229	-0.174148672216229	-0.174148672216229	-0.174148672216229	-0.174148672216229	-0.174148672216229	-0.174148672216229	-0.174148672216229	-0.174148672216229
79930541b37f85bd77cce357cd63dbb4	-0.393449253286854	0.171255523780235	0.494770087934424	0.214837059913218	0.182035584537795	-1.47066475064004	-0.564266762380423	0.910288352984762	-0.661460191087792	-0.272258382051414	-1.47065122476916	0.820784268683991	-0.35448961787824	-0.734895761070239	-1.47066475064004	-0.228720993035255	-0.68478549563861	-0.397105118109555	-0.161772321751972	1.42058968866178	1.03599485736171	0.24809198453759	-0.748969817959366	-0.742233468157309	-0.396798618494068	0.250721883825974	-1.47066475064004	0.997633118482993	0.435779682663117	-0.290672188107598	0.708889395503723	1.26391985176422	3.35893212506244
bc560da189cc724070e0d261f6ab3004	-0.5043653577578	-0.540765375072756	2.8280565428897	2.21537516121266	0.314602973415871	2.23387842875708	1.30062761500908	-0.540776472515588	-0.506919914153973	-0.511538767525346	0.871572096236527	-0.501987877974149	2.06607713148756	-0.102846571213762	-0.515843099489934	-0.540757962966164	-0.54070658752241	-0.540776472515588	-0.540776472515588	-0.48571945004396	-0.484491922241426	-0.540668997462744	-0.540769060589669	-0.540724398115714	-0.540767408399243	-0.498616380036258	-0.49789906059148	-0.540736819110568	-0.540759331943591	-0.540712191147499	-0.540725808187208	-0.480945368280856	0.831407178364801
df1e3080300aed496c300246714bd838	-0.306815835368041	-0.306958873984899	-0.307037156859249	3.83075957460586	-0.306611039377178	-0.307037156859249	-0.307037156859249	-0.307037156859249	-0.306649942361924	2.84038840119712	-0.306999230982888	-0.307037156859249	-0.306804420797028	-0.307037156859249	-0.307037156859249	-0.306910156607355	2.53608066632908	-0.307037156859249	-0.307037156859249	-0.307037156859249	-0.307037156859249	-0.306305678005324	-0.306986196128275	-0.306680852500524	-0.306974860390103	-0.307037156859249	-0.307037156859249	-0.306765452883876	-0.306919437936729	-0.30659861643546	-0.306690695483723	-0.307037156859249	-0.307037156859249
e903adaeb0efbea42c9d5aa462c105da	0.359146011172139	1.51048265127912	-1.05743489786091	-1.05716244972123	-1.05719478940149	-1.05743489786091	-1.05743489786091	-0.925239167111063	-0.281091335580681	0.403729300295114	-0.819505815336592	-0.623278175098309	-1.05730383534141	0.497511460377045	0.536175642306775	-0.89710405477787	-0.123122490189792	0.943301581121259	-0.203395001620874	0.958816995010301	1.56616224338344	0.94307745038734	2.27586360482033	2.33484709733545	0.0329313319445007	-0.350112048752232	0.970078581271813	-1.05727499765177	-0.776973354296803	-0.198712472437385	0.355955231911639	-0.55501897276384	-0.533285528952178
cd6dbb569337fc7ba0542287c426baa1	-0.549205301436455	-0.549247032425384	0.774481620510816	0.157763825891702	0.937340866897403	2.39313305905672	2.2284738393543	2.00921250621394	-0.549156791617356	-0.549269846654623	0.658992661930562	2.00989176410452	2.01298576126633	-0.549269846654623	-0.549269846654623	-0.549269846654623	-0.549269846654623	-0.549269846654623	-0.549269846654623	-0.549269846654623	-0.549269846654623	-0.549269846654623	-0.549269846654623	-0.549269846654623	-0.549269846654623	-0.549269846654623	-0.549269846654623	-0.549269846654623	-0.549269846654623	-0.549269846654623	-0.549269846654623	-0.549269846654623	-0.549269846654623
04611dabe3583caf155167674ef7e0e4	1.00359981487052	0.332420028792031	-1.00033328709836	-1.00021635047977	-1.00023024181373	-1.00033328709836	-1.00033328709836	-1.00033328709836	-0.0333947588052712	0.199673262198594	-1.00032413142082	-1.00033328709836	-1.00027705055444	-0.359006638251882	0.178336508935424	-0.168171538745106	-0.367713652574839	0.996715435172295	2.27803255102137	1.57127122602309	2.36630543518947	0.328671284895313	-0.413230163988005	-0.581312821436741	0.717248661135545	0.3395273311327	1.92945400758567	-0.662630207435086	-0.573926093179146	-0.816603601647859	0.853318153164147	-0.304019497355197	0.188149483063565
ca8316436bfd3aa62fc76e2ed5b8fca8	0.424617965278712	1.16303576187128	-1.34212081832632	-1.52970449295302	-1.42276707820792	-1.35610469277502	-1.33127778786303	-0.659150722499943	1.34973834481509	0.853275110791286	-0.416603010854823	-0.257514011098969	-0.513734312507924	0.731692255432974	2.08633380570179	-1.07049667644784	-1.44347614702194	0.0552219921705666	0.45701567127969	0.265996111426284	-0.463027404073806	0.315000636845648	0.102307259893847	0.468719499176107	0.636782445510429	0.271598295049886	0.65624280066277	0.248884489705207	2.47586420400189	0.115889184836831	-0.141256459055966	0.28854253479951	-1.01952475556327
fe1613129b71ea6b0351addf25c8bdbf	-0.436254857041694	-0.611880492913411	1.56132068895577	0.565973721945055	-0.000127599006593712	1.71852458846307	1.35671893736774	-0.385311199527265	-0.299151734951832	-0.376535254853163	2.59128057812253	-0.299461503818979	2.38584984583551	0.0367751111776503	-0.611898335021939	-0.611868440192089	-0.611785420568171	-0.611898335021939	-0.611898335021939	-0.390416346959972	-0.264683741854735	-0.611724624373586	-0.611886366220419	-0.611814208301509	-0.611883697753126	-0.611898335021939	-0.611898335021939	-0.611834282792667	-0.611870653598866	-0.611794460236009	-0.611816482118355	-0.235806953151544	2.26095652347636
95fdd816723ca482a5caba10bea171c8	0.609726192622384	1.4114798430076	-0.947603709658089	-0.94718608440451	-0.540111010239734	-0.0277367481528391	1.83983674257749	0.724573075433757	0.189420308014387	1.19991295356446	0.19713251708209	0.239929418798821	-0.947402829322235	-0.692615666515394	2.86469715792357	-0.947490393692445	-0.947175826232952	-0.420262776286239	0.0238077995906212	0.118764340955312	-0.201706409212244	0.0955139942789028	2.30431331577006	-0.197474093836249	-0.743927413724099	-0.586638104064595	-0.304474926422547	-0.947360942058795	0.673808266319281	-0.947210120367861	-0.947293514963444	-0.251641647126378	-0.947603709658089
5328bc3fa40912ff2a09f9a53ac20c93	0.208970741480847	0.814599479194679	-0.941815820275479	-0.159379168834711	-1.02054712727234	-1.32380616829998	-0.0946586634899352	-0.246817837633489	-0.445962062818236	0.402068572678677	-0.461244368730606	2.49001060112464	-1.03110824133766	-0.976934018764691	-0.00151683174146464	0.858442886689305	-0.494523585548451	-0.81896493779212	0.787332760046265	-0.454406534952872	-0.109352471245385	1.82030445639624	0.429345650575543	-0.824808629952431	-0.0480347358387527	1.35653203855493	2.61484531434868	0.0934555067211862	-0.978214157331869	-0.641229384972393	0.708178848951659	-0.332682007088805	-1.17808010284098
a8c32a5a27d0d56118ecc368e6b0329a	1.19759752515441	1.5616833933099	-0.890282761718174	-0.890149269926627	-0.890165136439317	-0.890282761718174	-0.715617661789213	-0.890282761718174	1.62439349824748	1.52987019696874	-0.890272313459712	-0.089016462578423	-0.890218576344936	0.881663811470893	2.68402667733814	-0.477695100468525	-0.890145349583817	-0.688865102820463	-0.248306866075152	1.39562281496816	1.39202696788022	-0.496019785551808	-0.54002342885466	-0.242694629136752	-0.449795891454863	0.668502685397212	0.125349451289149	-0.539091802204919	-0.647433398806771	-0.890156324744742	-0.247632234358956	0.78957726456597	-0.4561666668361
0b7f1cb34b5d69f9a7e85a494eab0be4	1.82745517936979	0.897755629512633	-0.659782234615068	-0.659645396627261	-0.659661657044661	-0.659782234615068	-0.659782234615068	-0.659782234615068	1.92033927943028	1.60450656177856	-0.659771522832105	-0.659782234615068	-0.659716434601641	0.492212964333328	0.734253891372426	-0.659744974190717	-0.659641438861001	-0.659782234615068	-0.659782234615068	0.0365493404520211	1.43859409943148	-0.65956554353413	-0.659767320049276	-0.65967735036548	-0.659763994102327	1.83207684495443	0.631393593018609	-0.65970238976893	-0.659747736301782	-0.659652690446137	-0.659680179307901	2.41752236392525	0.0215545227600227
f7428585b7cf8d65f206036a5852adab	-0.581325422826087	-0.072608297892439	0.671129686537137	-0.0850973135558335	1.89987233068638	2.83772357461545	2.13345141372551	-0.200295533097799	-0.581290466149558	-0.581371937346648	-0.58136397352464	-0.339384796513296	-0.271362945957745	-0.581371937346648	-0.581371937346648	0.0137179688420892	-0.581267277410046	-0.581371937346648	-0.581371937346648	-0.213729775420064	-0.191584349781269	2.54636574071295	-0.581360851201649	-0.581293972933635	-0.0973487976508757	-0.581371937346648	-0.581371937346648	1.62329710213107	-0.581346294188733	-0.581275640104333	-0.371274672922758	-0.581371937346648	-0.581371937346648
d4b8175c2cc6c6722d5d45082d4fd64d	-0.3867892053277	-0.3867892053277	-0.3867892053277	-0.3867892053277	-0.3867892053277	-0.3867892053277	-0.3867892053277	-0.3867892053277	-0.3867892053277	-0.3867892053277	-0.3867892053277	-0.3867892053277	-0.3867892053277	-0.3867892053277	-0.3867892053277	-0.386767203244392	-0.38670604567362	-0.3867892053277	-0.3867892053277	1.34028248340494	1.20237140276097	-0.386661189541631	-0.386780399413253	-0.386727261627044	-0.386778435454833	3.44141601543347	-0.3867892053277	-0.38674205360746	-0.386768835383279	-0.386712684524849	-0.386728930386463	3.12509347768108	1.72041535547498
a6bfdb3176b2fc52c2e55ef46213f792	-1.19821742513574	0.930183405963375	-1.19831589097829	-0.0902314859475939	0.384953634341722	0.693479089879869	0.346972252526561	0.729076743535627	-1.19814343524446	0.457245189990473	1.04794442289317	1.51292474168097	-0.121427715758105	-0.324412849204665	-1.19831589097829	-0.856034282706532	-0.432521084123316	-0.203312155172199	-0.2958098745773	-1.19831589097829	1.16103283562321	1.61416302168376	0.473148700266018	-1.19815057387018	-1.19828714422122	0.815961211993322	1.84308958081053	-1.19819004579102	0.0763038457782001	-1.19811168796679	-1.19815503020174	1.02506459813126	1.19440918775766
f3e9d78daeea42d345080748e31ae3dd	-1.37239793348896	-0.234550624173743	0.261578313295865	1.40161356952195	1.34766189536897	1.94369372824308	0.368280789256269	1.06811243943515	0.765133731769421	0.539328724684908	-1.37250563751739	-1.37252788820874	-0.0552170258549011	0.126891907640719	-0.20026164046504	-1.37245043822213	1.45589052821211	-0.775969136508337	-0.308135035883202	-1.37252788820874	-0.282723140066928	1.32324180956209	-0.0149569669814115	-1.37230986728137	-1.37248997400092	0.306490204132493	-0.419716445087311	-1.37236191902501	-0.175498613841554	0.728421837681794	1.10588795508615	0.144096626019187	0.560276114905533
7ba07e4c2fed4da2d0fffb31ebc6c4ae	-0.0603065455761434	1.31989612014858	0.75865646251844	1.70714108100432	1.13227554202135	0.57167786066629	-0.278336163365766	0.53608064308258	-0.73099358127983	-0.731092330300695	-0.532101626032032	-0.675307862508971	-0.731033032277987	-0.731092330300695	-0.731092330300695	-0.731058722789472	-0.730965324090933	-0.731092330300695	-0.731092330300695	0.771372861698998	2.30741130017345	-0.73089684239837	-0.731078878626019	-0.730997721873411	-0.731075878743163	2.2118631512892	0.432059264038026	-0.731020310718693	-0.731061214863389	-0.730975469161296	-0.731000272327629	1.9764468318477	0.248789979647645
0c0dccc9621a59b6d8a92b3d540e3597	-0.732697529224276	1.31821225225999	-0.381760939768741	-1.23079565046485	-0.0779090132108479	-0.789682694868691	-0.434041310172604	2.53072637375626	-0.206045027794057	0.257471849020754	1.19925315098009	0.0153437211799659	0.371135248007276	-0.795904517162049	0.0373535517352553	-0.625570425367083	-1.23078750611613	-0.600734499575792	-0.585720250900418	-0.512847918328849	-0.203052402061169	0.270246290469946	2.03430671632738	0.584967803891365	-0.527620251954866	1.44163716710156	-0.369771190290307	-0.86100314392505	1.82034168244975	-0.870258616531857	-1.23086347444139	1.23206093158226	-0.845990376602828
8d16493f61b4859028a7a760a82751ce	-0.887524505904174	-0.887562278494393	-0.887582927720347	-0.88745512605844	-0.887470318559734	0.880809177007232	2.07155419670859	1.82775894536667	0.716539622698759	0.174726315067551	1.58332075693493	0.616911675546204	1.05683857505708	1.2606553474343	2.40831424762633	-0.887548218813249	-0.887451785601834	-0.887582927720347	-0.887582927720347	0.479309914856849	0.370159952708043	-0.232881892273573	-0.887569033842115	-0.887485231757637	-0.887565935651797	-0.0398660953820067	-0.0494667345321971	-0.0878863697372391	-0.887550791108131	-0.887462269771463	0.00513918723262267	-0.352024570735287	-0.264517972860837
938fbbe51af86d1d7ebd6817a0f0bd24	-0.917305888168029	1.12377424750223	-0.075148335949939	0.201851829788192	-0.917213741628957	-0.20096189802058	0.0149694521205975	0.371689755083223	0.316438156015895	0.476189016646826	-0.917388254955469	-0.917405272139513	-0.91730074655081	0.759898314893469	2.5395350848209	-0.335182252829676	-0.917181428603539	-0.917405272139513	-0.0445351450701919	1.41367566221865	2.06171095834717	-0.917060771309404	-0.293964721706689	-0.917238521550371	-0.917376271957807	1.43854568962697	1.60757783929526	-0.917278329918965	-0.917350424180888	-0.551562917142374	-0.91724301946484	0.871745663133298	0.228501543794872
f4ad92074fc1b41b8ada1a77cc50d272	0.88911118333571	0.624415836938148	1.15365823530245	3.04252969009026	3.28136104090872	0.161864110450151	0.0621105964951099	-0.323426074823875	1.33697688535278	1.32029307022711	-0.502118589378772	-0.502129122315426	-0.502064416273862	-0.502129122315426	-0.502129122315426	-0.502129122315426	-0.502129122315426	-0.502129122315426	-0.502129122315426	-0.502129122315426	-0.502129122315426	-0.502129122315426	-0.502129122315426	-0.502129122315426	-0.502129122315426	-0.502129122315426	-0.502129122315426	-0.502129122315426	-0.502129122315426	-0.502129122315426	-0.502129122315426	-0.502129122315426	-0.502129122315426
cfdf39cd6545fb6a7ddb747c3393c225	-0.532337764580398	-0.532375268346995	-0.532395776270994	-0.53226892434738	-0.532283988917169	0.0435232515545545	0.0795044207949856	-0.532395776270994	0.12610437540369	-0.532395776270994	0.478161468847798	0.419473854160989	0.878553939690488	0.641628066438076	-0.532395776270994	4.57123259095006	1.23918543686764	-0.276173245352733	0.272713816018031	-0.532395776270994	-0.532395776270994	-0.532193962398257	-0.532381891262304	-0.53229811355576	-0.347029810446466	-0.532395776270994	-0.532395776270994	1.39673409813706	-0.532363657983551	-0.532275137523681	0.591124208561261	-0.532395776270994	-0.532395776270994
4ebcf74b2783b601ceaf1ca7a994420a	-0.198498609024489	-0.198682532081476	-0.198783266806899	-0.198162309162122	-0.198235626212945	-0.198783266806899	-0.198783266806899	0.65060269571367	-0.198285644259447	-0.198783266806899	5.50932765968592	-0.198783266806899	-0.198483964486646	-0.198783266806899	-0.198783266806899	-0.198783266806899	-0.198783266806899	-0.198783266806899	-0.198783266806899	-0.198783266806899	-0.198783266806899	-0.198783266806899	-0.198783266806899	-0.198783266806899	-0.198783266806899	-0.198783266806899	-0.198783266806899	-0.198783266806899	-0.198783266806899	-0.198783266806899	-0.198783266806899	-0.198783266806899	-0.198783266806899
707740d13076516032127f753473cfc3	0.626840446652103	-0.536970758602234	-0.536986875433382	-0.536887140134664	-0.53689899331405	2.47258041346547	-0.249458808368327	0.282541173844852	-0.536907012070538	-0.536986875433382	4.41250702223245	-0.536986875433382	0.155749297171751	-0.536986875433382	-0.0776291510173502	-0.295272686651873	-0.0693353344713678	-0.536986875433382	-0.536986875433382	-0.536986875433382	-0.536986875433382	1.02731769338164	-0.108609814580261	0.112510931395466	-0.18838990870886	-0.536986875433382	-0.384057250245814	-0.53692872210697	0.336318057374209	-0.168550413982077	0.171910229936442	-0.536986875433382	-0.00251051686618039
bf34422106e5974ddf75216e2c05273c	0.5632660925163	-0.477160586222634	1.65745415737518	2.17322528839434	1.99169154088621	0.883168280654822	0.0851540888710379	-1.31665101532467	-0.121425922821777	0.474167123506148	-1.31662188879121	-1.31665101532467	-1.31647212391687	-0.52260853365422	-1.31665101532467	-0.132058210737703	0.273598762976522	-0.659631490248212	-0.718663655474835	-0.0685381550332273	1.23552192205391	0.944092621046552	-1.31661039065577	-0.0301426688907838	-0.519791996654783	-1.31665101532467	0.480336079008924	0.459517876150177	-0.468030298907845	1.02107580304035	-0.204243318784586	-0.143199910397853	1.03953357601051
5284495840f983847ec0d0b741a9a471	-0.874863625776776	-0.874958022936685	1.34321995531693	0.139671798285742	1.12472346000412	0.97206131609533	-0.875009645200409	0.636192993776546	-0.87475396534913	0.390706305940632	0.517511553464645	-0.257715500864986	0.141087641206224	0.262672315307459	-0.875009645200409	0.3307459346162	2.54015380036265	-0.148636467954027	-0.532424334339828	-0.875009645200409	2.06488232279391	-0.8745033862569	-0.874974782831311	1.0083945253002	-0.874967009315464	-0.875009645200409	-0.875009645200409	-0.874823041130538	1.31293081092768	1.27750407622486	-0.874771156464627	-0.875009645200409	-0.875009645200409
610fec3c1f64661f446a6e8270f23d0c	-0.404794239787826	-0.404876243935113	0.738684414060042	-0.404643754885871	-0.404676677919599	1.31516892261142	4.52366024686572	0.942229566261499	-0.40469898298817	-0.404921090415593	1.11656724345646	1.67980979134208	-0.404787681625496	-0.404921090415593	-0.404921090415593	-0.404852803867603	-0.404665597379135	-0.404921090415593	-0.404921090415593	-0.404921090415593	-0.404921090415593	-0.404531426678685	-0.404893623466762	-0.404730127881664	-0.404887528745753	-0.404921090415593	-0.404921090415593	-0.404775229737743	-0.404857724364327	0.209418976914616	-0.404735523676559	-0.404921090415593	-0.404921090415593
00edbd1ba8dcda99fa8c48ebbad76bc3	-0.378796459464153	1.44798017635202	0.526461524832971	-0.390090363819098	0.522121570622326	2.83693722858576	1.07094902340364	1.64606651073512	-0.185362948046389	-2.29195447279722	1.48621606617985	0.0684776363556321	-0.0132300166368915	0.415750165999271	1.6579993103225	-0.640115950609171	-1.07674180063901	-0.453694866081078	0.42133739871648	-0.50450876575319	-0.610734568779933	0.116154955130428	-0.889610304222094	-0.381331935834498	-0.52838037795051	-0.124059325791616	-0.577088760459677	-0.417446383437573	-1.07662969344945	-0.0196306425317642	-0.698862949300482	-0.0975529473970453	-0.860628034235167
f5bf7ef226b458f24103a3531394ec7d	-0.644188283312945	-0.644188283312945	-0.644188283312945	-0.644188283312945	-0.644188283312945	-0.644188283312945	-0.644188283312945	-0.644188283312945	-0.644188283312945	-0.644188283312945	-0.644188283312945	-0.644188283312945	-0.644188283312945	-0.644188283312945	-0.644188283312945	2.23451449971732	2.05843333735531	1.74151259185636	0.810635022343482	-0.644188283312945	-0.644188283312945	1.05367681464312	0.966292484727231	-0.299312478413083	0.416724968104029	-0.644188283312945	-0.644188283312945	1.44956233169709	0.847050863992638	-0.0397480279197164	2.28861154146807	-0.644188283312945	-0.644188283312945
acf76b1f22c9536ca982df6f9b0219da	-0.314349110114592	-0.314379757666591	0.208348236997694	4.95892066340564	1.94154258482964	-0.314396513112084	0.973441340775728	-0.314396513112084	-0.314313486429617	-0.314396513112084	-0.314388397119348	-0.314396513112084	0.228992046400403	-0.314396513112084	-0.314396513112084	-0.314369925714213	-0.314296624592174	-0.314396513112084	-0.314396513112084	-0.314396513112084	-0.314396513112084	-0.314243593928501	-0.3143858406704	-0.314321957405714	-0.314383467563129	-0.161367834094058	-0.314396513112084	-0.314339645681245	-0.314371864659069	-0.314304796449541	-0.314324024123283	-0.314396513112084	0.0236536111473686
1ece08fa5a366f1361e7ea04639f1c4f	-0.268889334458128	-0.268930960813483	-0.268953722047141	-0.268812918749592	0.161647436630654	0.853953638660466	-0.268953722047141	5.37904152399758	-0.268840965385739	-0.268953722047141	0.344061042290551	0.034786169668114	0.487919975243821	-0.268953722047141	-0.268953722047141	-0.268953722047141	-0.268953722047141	-0.268953722047141	-0.268953722047141	-0.268953722047141	-0.268953722047141	-0.268953722047141	-0.268953722047141	-0.268953722047141	-0.268953722047141	-0.268953722047141	-0.268953722047141	-0.268953722047141	-0.268953722047141	-0.268953722047141	-0.268953722047141	-0.268953722047141	-0.268953722047141
1eeda6a9e8ebf5b66a6506ec39ce3f2a	1.55122914308317	2.21423325354109	-1.08811254417572	-0.607004189967129	-0.951612241929661	-0.484614504324589	-0.941929376456759	0.162494600066313	0.639830438158582	0.543975933016096	0.0619002568368921	0.761956362544861	-0.564849844561302	-0.25710575717208	1.28468279501928	-1.14137249141922	-0.423410267427558	0.223758939872259	-0.293134335268405	0.413088738156899	1.96932683674207	-1.28044321441863	-0.964321498391982	-0.711621994675631	-1.01807264791432	1.65801924081726	1.53530903095784	-0.46478331632982	-0.522354330402831	-1.03821756117519	-1.01078248975048	0.437136005384716	0.30680103156397
da47a7f676f9a37da03e64a99251fd78	2.20769233009966	0.184995845382975	-0.635797515617722	-0.635688518691488	-0.635701460639577	-0.635797515617722	-0.635797515617722	-0.635797515617722	-0.419950089685696	-0.297264959197617	-0.635788978950571	-0.635797515617722	-0.63574508808233	-0.469418085286456	-0.0786962218952766	-0.379711127383883	0.0639106202041619	0.898795330462146	0.0760010743034734	4.05113883135173	0.876607032098561	-0.635623848392441	-0.518272035140203	1.11080479805069	-0.635782904530743	0.19853793363612	0.961729682755116	-0.635733547431462	-0.324622058449351	-0.635693705863877	-0.334542087017679	0.684404560894173	-0.227395744511549
9b5811da3588dc72c1fce3ea07d51eac	-0.568310323770815	-0.568310323770815	-0.568310323770815	-0.568310323770815	-0.568310323770815	-0.568310323770815	-0.568310323770815	-0.568310323770815	-0.568310323770815	-0.568310323770815	-0.568310323770815	-0.568310323770815	-0.568310323770815	-0.568310323770815	-0.568310323770815	0.825137056241388	-0.567759416968665	0.0628921916392693	1.58862579064947	-0.568310323770815	-0.568310323770815	1.35459730304492	0.0735695184095391	-0.567899880749589	1.93838121818484	-0.568310323770815	-0.568310323770815	3.07014006800431	2.00089555739635	0.997199871019279	1.15873752231602	-0.568310323770815	-0.568310323770815
153c93e302c4700f4c3515546aa47a1f	-0.53966387178613	0.156163637168139	1.49041059528005	0.407426173054327	0.858114992889602	0.385326435523599	-0.850211369157867	-0.169547089520446	0.58014466557531	0.50569916508142	1.48893251269036	-0.722319400941616	0.67977165284614	3.21121187821599	0.27153380054835	0.228367261397384	-0.3934461026324	-0.50879634051514	-0.519683610766272	-0.752699360680713	-0.696022342117035	-1.27917058839028	-0.692348812682365	-1.27943793772896	-0.00527420503267541	-0.553344591295099	-1.02858397115614	1.14570713580242	-1.27960630267232	-0.5814270248625	-0.489229362427236	-0.677787134280956	1.60978951257306
e04cb8c96d35fee0e181a15fc4511d0c	-1.0994845529402	-0.752567564858863	2.31746866769062	3.28886415217861	1.06433407115197	-0.0530608257381193	0.780982990111213	0.0741166446790461	-0.500768810954787	-0.0263521067360487	-0.023405013771337	1.33795890601617	-0.0424615488569656	-1.09964283428385	-1.09964283428385	0.147008543956655	0.379280860186846	-0.138852751493305	-0.357931959025089	-1.09964283428385	-0.387580394862774	0.571767984318543	0.0180764584529936	0.406831142045069	-0.358495258607459	-1.09964283428385	-0.955214588963183	-0.0995813319525053	0.439239536237441	0.919038226962897	-0.502506615085253	-0.948490688722955	-1.09964283428385
03a1f9f63e2fa6c7bdf27d33eba2b09d	-0.634150327303433	-0.634217055992436	0.822480133267166	3.71168770889811	1.3070132374055	-0.324598610648644	-0.259570647723848	-0.634253539025947	0.980004894050933	0.281526417493764	1.72024138186018	0.00547193819804685	1.87068172771676	0.602383608130523	-0.442582130500007	-0.634193276715388	-0.18512263038338	-0.634253539025947	-0.634253539025947	-0.634253539025947	-0.634253539025947	-0.633904410838744	-0.634229393992023	-0.634084128808446	-0.634224014947551	0.0324969217506701	0.83901345336372	-0.634124486435268	-0.634197719148992	-0.634044586200613	-0.634088741739505	-0.634253539025947	-0.180148026601411
0df6c802966e8670279671824da4f10a	2.01109695906984	1.745316256994	0.307713590440091	-0.713228030960178	-0.621310463599013	-0.292956027596684	0.624082404268108	2.24266493923991	-0.50039295512903	-0.743996885736661	-0.872791237838443	-0.87280697606795	0.0352505762623656	-0.87280697606795	-0.87280697606795	-0.552985127545292	-0.586363640651313	1.8503561152908	-0.119246894086972	0.960012856973377	0.339656869942026	-0.621936869869989	-0.680553183964299	2.18660481776756	-0.872780141287034	0.885470312903871	0.0831955963089445	-0.5698341102101	-0.254360862616031	-0.669632371338779	-0.410766804419145	-0.697057784340135	-0.87280697606795
6397b20a49248172fe4f03c91a114738	1.43798315070952	1.58084751603684	-0.408211821006235	-0.408143134924809	-0.408151300735599	-0.408211821006235	-0.408211821006235	-0.408211821006235	1.68691673952641	1.7796949588616	-0.408206445848457	-0.408211821006235	-0.40817879836521	0.446939445566245	4.08916975231685	-0.408211821006235	-0.408211821006235	-0.408211821006235	-0.408211821006235	-0.408211821006235	-0.408211821006235	-0.408211821006235	-0.408211821006235	-0.408211821006235	-0.408211821006235	-0.408211821006235	-0.408211821006235	-0.408211821006235	-0.408211821006235	-0.408211821006235	-0.408211821006235	-0.408211821006235	-0.408211821006235
97fbd9fac072dc24ef7af2e143df17a1	-0.63853784274723	-0.638586784064322	-0.638613544017947	-0.638447989736672	-0.63846765656122	1.49996197070429	1.98812560639656	0.904881596918071	-0.638480968866031	-0.638613544017947	1.85149661326061	0.507902215444254	1.16003991321851	-0.638613544017947	-0.638613544017947	-0.638568464394634	1.15162680286534	2.78973693544888	-0.638613544017947	0.604572896129847	-0.638613544017947	-0.638351446485775	0.449817202787886	1.14004199486188	-0.638591474528638	-0.638613544017947	-0.638613544017947	-0.638516947647531	-0.638571804904775	-0.638456842811513	-0.63849008510831	-0.638613544017947	-0.638613544017947
98f7a3ab6c00ede77b927f2239576bac	-0.174154716338309	-0.174154716338309	-0.174154716338309	-0.174154716338309	-0.174154716338309	-0.174154716338309	-0.174154716338309	-0.174154716338309	-0.174154716338309	-0.174154716338309	-0.174154716338309	-0.174154716338309	-0.174154716338309	-0.174154716338309	-0.174154716338309	-0.174049920670211	-0.173759589733888	-0.174154716338309	-0.174154716338309	5.57048492874999	-0.174154716338309	-0.173547826391106	-0.174112724079457	-0.173860153645611	-0.174103369984197	-0.174154716338309	-0.174154716338309	-0.173930309954853	-0.174057641513155	-0.173791451027709	-0.173868182307012	-0.174154716338309	-0.174154716338309
4bd8c904977a197107f51a59ebac2fb9	-1.138852007981	-1.13893953732863	-0.0901555827897018	-0.23484246183022	-0.188230193200831	-0.239408556849139	0.00815159815709693	0.951500909531627	-1.13875036898749	-1.13898741335385	0.451945402457083	-1.13898741335385	-0.339439489333374	-1.13898741335385	-1.13898741335385	-0.441155586579025	1.27582602076754	0.513184707119261	2.02329709825189	-0.181155439987036	-1.13898741335385	1.31691325160307	2.2053796541185	1.7549030013654	0.656066992922046	-0.368922762570374	-0.098480599215819	0.0568147842065644	1.43841577491841	0.42984099448861	-1.13876481537449	-0.253095187571887	-0.397110533538847
634e293920d238dfa24961d096247760	0.286443625955462	0.839333988920674	1.15219775314579	1.6986105177117	0.446197661248063	-0.589393708596667	1.30204264848937	-0.75850703025176	-0.558936487739713	-0.275337539618101	-0.541118385116119	1.68946130669563	-0.735941661603408	-0.177658481879463	-1.04318319020342	2.31415581974496	-1.34974192164531	0.715805548428576	0.312891039920835	1.45071774692045	0.397800531821089	0.142630103497371	0.653239554637896	-0.769678666313827	-0.424028713445623	-0.268012287991976	0.38633650711356	-0.816576786999762	-1.3157730883939	-1.34494572968124	-0.329166777517832	-1.44644115634205	-1.04342274091125
683282878b7ef2a87187bc3172b91f97	-0.10182798523561	0.769402094916409	-1.31390255404765	-0.631046203917435	-1.10314472630667	-2.03761055858323	-1.00856988411215	-0.409907137896089	0.452139532823451	-0.900027218005009	-0.0177536916010286	-0.829744656228286	-1.28471391849498	1.49053367587715	1.56856356855094	0.542315975152843	0.594678220747028	0.176801204266593	0.963441574129817	0.141106553889435	2.87836437754309	0.405743770222462	0.172635594726392	0.471714350630958	0.196994873208349	0.93064456821035	0.823284669742187	-0.771123421338027	-1.01593621871365	-0.843052875959306	0.0868247013207908	-0.615359894436844	0.218531638917716
1f6f400a4c40ce9f7cea0e7145938045	0.0687055580618582	-0.214131822967689	1.0189434081774	3.37986287256329	1.91871910179693	0.27716940987507	0.0870754946197734	2.08987788669239	-0.407956502158905	-0.348722575048752	-0.463747768467066	-0.21710378200778	0.626829434216886	0.0585540324399372	-0.182799632291586	-0.783773754382758	-1.13099608664837	-1.13124710784318	-0.804630642026696	-0.313086481735059	0.441373584367805	0.198633841194032	-1.13122051081545	-1.13106010240478	-0.34776269880331	0.462458563174372	-0.329158033500594	0.52298870543968	-1.1311855898173	-1.13101615988867	0.242414379900753	-0.490296006929967	0.296288985217734
8fd618f97a48e4eb208b0445dbb10d8c	0.667217837546527	0.989593067981796	-0.509942953104027	1.83340464047728	1.0139672601309	-0.486349433057376	1.45769192440813	0.126858410432114	-0.590553326863913	1.34806512216637	-1.51747707481903	-0.990401796099647	-0.426278841687142	0.842212319965428	-0.519132694515866	0.21814911591653	-0.702873458152432	-1.12728316723115	-0.177435107629666	0.783165291070933	1.22670385376887	-0.570604280239954	-0.577428742409727	-0.968266259771972	-1.10018575687738	0.199999741928409	-0.317904399261956	-0.485205391147653	-0.987888037548637	-0.434871533956014	0.00198501448287062	-0.985855248903287	2.76692390300067
6b8307a0222360f36caf7065c78ff424	0.698106132859694	0.256166276046411	0.967135943327699	0.284551650209297	1.17989438036546	0.147755053744956	-0.514432338677168	-0.514432338677168	0.0678622917719011	4.46210180524481	-0.514424289870821	-0.514432338677168	-0.514382891640812	1.7247166361468	0.917617887451068	-0.514405075110933	-0.514329573367865	-0.514432338677168	-0.514432338677168	-0.514432338677168	-0.514432338677168	-0.514274540805337	-0.514421412412721	-0.514355720539443	-0.514418978865297	-0.274390058294305	-0.0604562411984681	-0.514373962896037	-0.514407082070033	-0.514337869976131	-0.514357811818368	-0.289654196048259	-0.307891981513088
e15409a395527f26caea7d4aec5b9970	-0.308880348249905	-0.923971395989877	-0.0939570355514462	0.0696153617967516	-0.966543065505993	0.63923228284142	2.30337292545992	0.607077188397733	-0.285508351111202	-0.268382560316567	0.458256065045249	0.375658357380306	0.629528464023338	-1.19321490580207	0.114744934458159	-1.04417391831471	-1.10740015909693	-0.297710962304672	-0.76923371456768	2.39102092259452	0.714082783901209	-0.378975085168894	0.151609813327205	-0.447727150214494	-0.426544144684676	1.01640685148069	0.935276946160061	-0.551595145904491	-0.889560154753986	-2.0297301764509	-0.812136211919774	1.99224668069255	0.397114908349167
2fa0305cd3ff0c4007a78fec9a60cdf9	-0.174355432590074	-0.174355432590074	-0.174355432590074	-0.174355432590074	-0.174355432590074	-0.174355432590074	-0.174355432590074	-0.174355432590074	-0.174355432590074	-0.174355432590074	-0.174355432590074	-0.174355432590074	-0.174355432590074	-0.174355432590074	-0.174355432590074	-0.173967986221188	-0.17290052710825	-0.174355432590074	-0.174355432590074	-0.174355432590074	-0.174355432590074	-0.172129135507083	-0.174199869630871	-0.173269324598971	5.57048414874133	-0.174355432590074	-0.174355432590074	-0.173526863047894	-0.173996201056262	-0.173019789797946	-0.173299502201162	-0.174355432590074	-0.174355432590074
0e6645acd71bc7e1dc285638b8c3b44b	-0.334695750666648	-0.334744334205526	-0.334770903232168	-0.334606592556774	-0.334626099175221	-0.334770903232168	-0.334770903232168	-0.334770903232168	-0.334639313884444	-0.334770903232168	-0.334758033056019	-0.334770903232168	-0.334691865110384	4.95396234269734	0.445604804255821	0.203170548625806	-0.334602083556821	-0.334770903232168	-0.0112639643562105	-0.334770903232168	-0.334770903232168	-0.334511203370965	-0.33475300667312	1.28741003226429	-0.334749016740043	-0.334770903232168	-0.334770903232168	-0.334675133473492	1.65482273251163	-0.0204941763540779	-0.334648522274669	-0.334770903232168	-0.145260526114459
b301115074f6e3de36efa48b692c7f8b	-0.8848493411138	-0.150239598076319	1.99889274714013	0.836137043155697	1.28675567018734	-0.437360917855166	-0.884948664501226	-0.884948664501226	0.107333813165174	-0.350970058581628	-0.884931657325116	1.97667964929171	-0.460414222120565	-0.134792596257121	-0.884948664501226	-0.484721384593373	0.53753683106304	-0.501579747605182	0.45327831306297	-0.884948664501226	-0.884948664501226	0.501875788090467	0.179803128310002	-0.24542977661457	3.51027013587218	-0.403174414303787	-0.703144454711777	-0.0121431972976473	0.229002040855102	0.0652783517104266	0.0136362173041309	-0.733036375744962	-0.884948664501226
54dcb911e3ab04e9d5b30c3912100b41	4.17821929568983	-0.249284324308855	-0.249499419244055	-0.248177754084398	-0.248332960845201	-0.249499419244055	-0.249499419244055	-0.249499419244055	-0.248439583494496	-0.249499419244055	-0.249395168476868	3.55175707997698	-0.248861103355612	-0.249499419244055	-0.249499419244055	-0.249499419244055	-0.249499419244055	-0.249499419244055	-0.249499419244055	-0.249499419244055	-0.249499419244055	-0.249499419244055	-0.249499419244055	-0.249499419244055	-0.249499419244055	-0.249499419244055	-0.249499419244055	-0.249499419244055	-0.249499419244055	-0.249499419244055	-0.249499419244055	-0.249499419244055	-0.249499419244055
5a483930ae687501d239547148452dec	-0.361373928569555	-0.361514728605791	-0.36159174830104	-0.361115700704696	-0.361172163163319	-0.36159174830104	-0.36159174830104	-0.36159174830104	1.64951631434383	4.25101749866249	-0.361554437781676	-0.36159174830104	2.09577984199481	1.73189121467097	0.395136300076858	-0.36159174830104	-0.36159174830104	-0.36159174830104	-0.36159174830104	-0.36159174830104	-0.36159174830104	-0.36159174830104	-0.36159174830104	-0.36159174830104	-0.36159174830104	-0.36159174830104	-0.36159174830104	-0.36159174830104	-0.36159174830104	-0.36159174830104	-0.36159174830104	-0.36159174830104	-0.36159174830104
e61b52cd3ace83b9a3515c17c6438a87	-0.408753807499424	-0.408840452149406	0.178452230910497	-0.408594830812454	-0.408629606571245	-0.408887839390509	0.698950957128666	-0.408887839390509	-0.408653173678153	1.44654181798926	-0.079719585902947	4.63723007838567	1.70972119658253	-0.408887839390509	-0.408887839390509	-0.187193794346937	-0.408593930924541	-0.408887839390509	-0.408887839390509	-0.408887839390509	-0.0055919291447114	-0.408436652685349	-0.408856577469621	-0.0325802704564753	-0.408849615631536	-0.408887839390509	-0.408887839390509	-0.408720853718377	-0.408815581160533	1.03637529526082	-0.40867468081013	-0.408887839390509	-0.408887839390509
25f537c4856de1617e682de90caba215	-0.492135900541511	-0.492175979117197	2.0825090079439	2.74079533722987	2.79496112107134	1.51570766065492	1.9266158092564	0.34316979200553	-0.492089311910412	-0.492197890054236	0.550554487179935	-0.277308860640118	0.135552528006277	-0.492197890054236	-0.492197890054236	-0.492197890054236	-0.492197890054236	-0.492197890054236	-0.492197890054236	-0.492197890054236	-0.492197890054236	-0.492197890054236	-0.492197890054236	-0.492197890054236	-0.492197890054236	-0.492197890054236	-0.492197890054236	-0.492197890054236	-0.492197890054236	-0.492197890054236	-0.492197890054236	-0.492197890054236	-0.492197890054236
ce54b572b93affd7afe291853b517e21	0.549397055625476	0.557537643237472	-0.0272367619582679	-0.925115781042778	-0.92514503330816	-0.925362102694938	0.846921449630899	0.747080963513892	0.292490782720301	-0.925362102694938	1.19030005269789	1.56745403138334	-0.925243629178775	-0.925362102694938	-0.925362102694938	-0.925294860128984	-0.925108017715574	-0.11651929197433	-0.925362102694938	0.364563678970318	1.44177036987075	-0.92497106021972	-0.925335186694421	0.021582134056606	-0.925329184476838	1.44503635758417	2.44190092872837	0.932303995739759	-0.925299844586174	-0.925128324087056	-0.358373236666753	0.802950743120467	1.17962053863282
b358d76cf51dad99d526470074e5f31c	-0.535800807934027	-0.535867828382529	1.78875476866482	-0.53567782837247	1.29533955867889	-0.5359044816705	1.03888454044474	-0.5359044816705	-0.535722961344269	1.23905022151637	-0.535886726481785	-0.5359044816705	-0.535795448543026	0.619123484117306	-0.5359044816705	-0.535842677237358	-0.53567102066487	-0.5359044816705	-0.5359044816705	-0.5359044816705	-0.5359044816705	-0.535545287316127	-0.535879738571728	-0.535730547539163	-0.535874221789935	1.31357795022522	0.307297932125733	-0.535772056315219	-0.535847254445177	-0.535689703671858	-0.535735246562243	1.73618396221899	3.52136279054372
881827d013845a8d4e929224f9fd24e1	-0.384034294316813	2.23555223351509	-0.0109336616595871	-0.383962363862745	-0.383978110264761	4.25538619890315	1.85533856606132	1.1867698729296	-0.383988765623886	-0.38409488481922	-0.384084510541727	-0.38409488481922	0.456370428766155	-0.38409488481922	-0.38409488481922	-0.384062905379203	-0.383975403337371	-0.38409488481922	-0.38409488481922	0.00681133047548431	-0.38409488481922	-0.383912891352898	-0.384082012668853	-0.38400553869243	-0.384079158492006	-0.38409488481922	-0.38409488481922	-0.384026607965192	-0.38406520014176	-0.38398539377753	-0.384008079562615	-0.38409488481922	-0.38409488481922
6ad914e7f81c311b1d7c7921bb90c92e	-0.35922124989735	-0.35922124989735	-0.35922124989735	-0.35922124989735	-0.35922124989735	-0.35922124989735	-0.35922124989735	-0.35922124989735	-0.35922124989735	-0.35922124989735	-0.35922124989735	-0.35922124989735	-0.35922124989735	-0.35922124989735	-0.35922124989735	-0.359192525758013	-0.359112691707065	-0.35922124989735	-0.35922124989735	-0.35922124989735	-0.35922124989735	-0.359054147551577	-0.359209753178901	-0.359140385317016	-0.359207189195491	2.76355122891294	3.30023573170713	-0.359159693953975	-0.359194656089125	-0.359121360945201	-0.359142564610927	2.53387176498256	1.8190799907543
ea9c1edfdf60a0a532f516b20689e41b	-0.507566597224054	0.272963250961667	-0.953642865874595	-1.82919884358555	-0.706463225390039	1.16028387478268	1.49289795646801	0.654215480910392	0.0126605114160702	0.895007469887719	1.18462298004054	0.00488491606363627	0.523633545961414	-1.82981917518804	0.661957107439299	-1.10075193962339	-0.678228311693075	1.04663594258405	-0.55359946018465	0.588037263287605	0.0454076333432934	-1.15050454404361	-0.120231851533779	0.716095027440644	0.1661795266774	1.08119441515369	1.78135169983958	-0.580423549800452	-0.837695292630868	-0.504238903994867	-0.543424304467205	1.43757943816451	-1.82981917518804
4ed1b5cf2300afb72f7fb97ec6ff2e9e	-0.276721385978698	-0.27674094491045	-0.276751637296984	-0.276685461073076	-0.276693327648123	-0.276751637296984	-0.276751637296984	-0.276751637296984	2.75226353516091	-0.276751637296984	-0.276746458192248	-0.276751637296984	-0.276719820062449	4.6088493489347	0.941233808897046	-0.276751637296984	-0.276751637296984	-0.276751637296984	-0.276751637296984	-0.276751637296984	-0.276751637296984	-0.276751637296984	-0.276751637296984	-0.276751637296984	-0.276751637296984	-0.276751637296984	-0.276751637296984	-0.276751637296984	-0.276751637296984	-0.276751637296984	-0.276751637296984	-0.276751637296984	-0.276751637296984
17e3b0c68a0c50a547dd9db57d609a89	-0.406661132161396	-0.406703336398243	1.00027712184439	-0.199370063044339	0.365627483517875	1.20000499652642	1.21763408946356	4.5490087692672	-0.406612078736497	-0.406726410784914	0.054157167578459	-0.212634045695904	1.78652565432165	-0.406726410784914	-0.406726410784914	-0.406726410784914	-0.406726410784914	-0.406726410784914	-0.406726410784914	-0.406726410784914	-0.406726410784914	-0.406726410784914	-0.406726410784914	-0.406726410784914	-0.406726410784914	-0.406726410784914	-0.406726410784914	-0.406726410784914	-0.406726410784914	-0.406726410784914	-0.406726410784914	-0.406726410784914	-0.406726410784914
aa72cb690f877a365de8223b4466671b	-0.314546573895685	4.48272814889828	-0.314595724443701	-0.314488247102133	-0.314501011298823	-0.314595724443701	-0.314595724443701	-0.171371308463369	-0.314509654271168	-0.314595724443701	0.0599476429953655	-0.314595724443701	0.0401643924729778	-0.314595724443701	-0.314595724443701	-0.314566510583718	-0.314485381220964	-0.314595724443701	-0.314595724443701	0.652175519699235	2.97543720959994	-0.314425968262846	-0.314584028320637	-0.314513513623825	-0.31458142063778	-0.314595724443701	-0.314595724443701	-0.314533131098153	-0.314568673617339	-0.314494214767448	-0.314515735576289	-0.314595724443701	0.139381152398796
3dfaa3fabdf04711351c97af550d2921	-0.754109584049268	0.211150218508359	-0.754223261763245	2.00290903665621	-0.754004189158582	0.543846583285671	-0.754223261763245	-0.363088907931751	2.58976989501781	1.39844490679923	-0.754203796783962	1.2499445973102	-0.754103703335872	0.836590771211711	-0.0598015530500058	0.0783454905438276	-0.753967984779029	-0.127168349196177	-0.754223261763245	-0.754223261763245	-0.754223261763245	-0.753830491953653	-0.754196207651276	0.454415637887844	-0.754190175516332	0.62418940884915	-0.372278003200473	-0.754078464545324	-0.754160689035758	-0.753988411269309	0.0170324514948009	0.421668995789724	2.55997882691846
92b8a97dbdde7cd3517311bf75a93a25	2.13094800125141	2.43905944866056	-0.0985689970279271	-1.01008142993439	-0.614490016999751	-0.288889153584967	0.670107674031098	-0.115676601444506	1.22467329648629	-0.136641341527201	-0.914349527374871	-1.29109052100386	-1.08492753620621	-0.670727272072246	0.192117039494575	-0.695124100696522	-0.31463682959742	-1.05611484025758	0.943553294631114	0.669898525954436	0.899856832244461	0.906379779210064	-0.807313168376578	-0.961524458728211	0.0590038524699517	-1.00059442749937	-0.519501254692025	0.422079591914272	1.82645692797288	0.025074024188483	0.930270646103115	-0.418641370130819	-1.34058608745828
3b0473ef9ba7bd7b0c6470c361915ebb	1.04381580103799	2.46791275799821	-0.609621446600321	-0.609462218077781	-0.6094811241421	-0.609621446600321	-0.609621446600321	-0.609621446600321	-0.609493929581173	1.82989870597965	-0.609608975686585	-0.609621446600321	-0.609544857325007	-0.609621446600321	-0.609621446600321	1.82148615658214	-0.609456803045853	-0.609621446600321	0.957512346669827	-0.609621446600321	-0.609621446600321	-0.60936802140029	1.06893246599367	-0.609498802713695	1.70306829030968	-0.609621446600321	-0.609621446600321	-0.609528086139873	0.154059913532598	1.8052329964677	1.16822363594539	-0.609621446600321	-0.609621446600321
1dacfff5549a7d2494f6a935ea1fb7e8	-0.939094621478792	-0.93920365477656	1.92865854492199	1.74633639214308	0.80715732090259	1.29717483990902	0.842911387296355	-0.805170568856211	-0.208302835412995	-0.939263283386475	-0.93923439886411	-0.729771941054867	0.641349938947707	-0.150393693020896	-0.939263283386475	0.299469160346212	-0.359462048393209	-0.255406722279914	-0.609371260608427	-0.939263283386475	-0.939263283386475	-0.132121573865045	-0.629679215565875	0.00762264843754398	-0.0756488124523352	-0.939263283386475	-0.681551800738278	2.8208073579735	-0.939170086534637	1.29986386685053	0.378158707078173	-0.0974754064172264	1.11786489244505
693c980645f0af912893409ceee83c7e	-0.304911575998151	-0.304945218267982	-0.304963611898196	-0.304849801569895	3.45123443981114	4.05466626641768	-0.304963611898196	0.83763082813321	-0.30487247558262	-0.304963611898196	-0.304954702319814	-0.304963611898196	0.500128924933119	-0.304963611898196	-0.304963611898196	-0.304963611898196	-0.304963611898196	-0.304963611898196	-0.304963611898196	-0.304963611898196	-0.304963611898196	-0.304963611898196	-0.304963611898196	-0.304963611898196	-0.304963611898196	-0.304963611898196	-0.304963611898196	-0.304963611898196	-0.304963611898196	-0.304963611898196	-0.304963611898196	-0.304963611898196	-0.304963611898196
ee766857ab5fc018ac26632146bc90e1	0.621999841632918	-0.0582350823505335	0.581812179937814	-0.193046371365449	0.777654612260393	-1.26590596607866	-1.26590596607866	2.23648784301392	0.61315563305851	-1.26590596607866	-1.26586637967025	-1.26590596607866	0.406933695042634	-0.132161134033793	-0.218331395268028	1.07051269324043	-1.26538413863778	0.697168715441393	0.228751517498769	0.0949111199909845	1.51674642499059	1.7357589363711	-1.26585067465057	-1.26551721409483	0.757885797153726	0.0469668431149428	-0.0246124872656416	-1.26561000526937	-1.26577807930064	0.66888200581235	0.366620259048588	0.911499815453406	-0.0497311068409093
f23d98130c516c32690c5f724acf5d83	-0.456105817427483	-0.456193405389983	-0.456241301542941	-0.45594505328086	1.52152276694014	-0.456241301542941	2.45693931684059	2.13087188363318	-0.456004056220602	-0.456241301542941	2.71610795732287	1.66642098321095	1.82593535985884	-0.456241301542941	-0.456241301542941	-0.456241301542941	-0.456241301542941	-0.456241301542941	-0.456241301542941	-0.456241301542941	-0.456241301542941	-0.456241301542941	-0.456241301542941	-0.456241301542941	-0.456241301542941	-0.456241301542941	-0.456241301542941	-0.456241301542941	-0.456241301542941	-0.456241301542941	-0.456241301542941	-0.456241301542941	-0.456241301542941
e1f3dca7a444e322745b21064cf6fbd2	-0.629891667187067	-0.629954445794569	-0.0567979106723821	-0.23735927399797	-0.6298016283572	0.944428528979403	0.280446830541307	2.01634644997651	-0.184475649389954	-0.629988769751295	1.95493847430679	3.36985050181818	2.40058368496062	-0.134359479586594	0.220356068044499	-0.629931787561083	-0.629773775709792	-0.629988769751295	-0.629988769751295	-0.629988769751295	-0.629988769751295	-0.101773391103897	-0.0466379350789301	-0.43969649036864	-0.15530158452668	-0.629988769751295	-0.452479067115833	-0.336875764952468	-0.315643205166697	-0.391861619258051	-0.629832884060065	-0.388660115744372	-0.385910244487301
6aaac37f56d07ffcea4fe9ef1cd00d2f	1.11017138601788	1.93994302254331	1.22239098636401	0.181685189395994	2.2115370643533	-0.565585854051064	1.33936677035314	-0.565585854051064	-0.565239223903678	2.3634149200024	-0.565551943377036	-0.565585854051064	-0.565377628986095	-0.565585854051064	-0.565585854051064	-0.565470341008125	-0.565150490428289	-0.565585854051064	-0.565585854051064	-0.565585854051064	-0.565585854051064	2.39794900511585	-0.565539558315232	-0.565261251720517	-0.565529247625028	-0.565585854051064	-0.565585854051064	-0.565338529513598	-0.565478841923408	0.310383726528413	-0.565270115837897	-0.0706046494226494	-0.565585854051064
a2059dc1d1825bb8a0a039915d189ef8	-0.248648061424588	-0.248648061424588	-0.248648061424588	-0.248648061424588	-0.248648061424588	-0.248648061424588	-0.248648061424588	-0.248648061424588	-0.248648061424588	-0.248648061424588	-0.248648061424588	-0.248648061424588	-0.248648061424588	-0.248648061424588	-0.248648061424588	-0.247850733122984	4.33840249168718	-0.248648061424588	-0.248648061424588	-0.248648061424588	-0.248648061424588	-0.244099729882794	-0.248327324585785	-0.246418592465393	-0.248256161488774	-0.248648061424588	-0.248648061424588	-0.246945054905846	-0.247908157417836	3.35679031149571	-0.246481636547956	-0.248648061424588	-0.248648061424588
891ead276ce87c2a025c7cac865eac93	-1.00732681182997	0.229854574303254	-1.00745956447194	-1.00716926563662	-1.00720374462714	-1.00745956447194	-1.00745956447194	0.645834674356076	0.749713852941656	0.514252568228833	0.509487834565837	1.76376116357191	0.234160258768421	1.26476517310404	0.862580317059403	0.35468168555318	-1.00716041981658	1.36373272260591	1.01590928968624	-1.00745956447194	-1.00745956447194	1.02779964195351	-1.00742787307373	-1.00723671538441	-1.0074208061068	1.14032728582386	1.73796695108246	-1.00728991349566	0.283704240497112	-1.00718433172568	-1.00724272783535	1.05387678349954	0.357551414290385
a927fa934cf9d977992764c4dcba0b7d	-0.528841043563716	-0.52890148896164	-0.528934548946934	-0.528730149749697	0.0986111591917966	1.30566783217841	-0.528934548946934	-0.528934548946934	-0.528770845800577	0.920066375727557	0.0327218080054945	-0.528934548946934	1.90216349875984	-0.528934548946934	-0.528934548946934	-0.528878662573178	-0.528723412184973	-0.528934548946934	-0.528934548946934	0.930603071292464	0.625398539133582	-0.528609658013431	-0.528912176700636	-0.528777254664065	-0.528907188169474	2.45673738873446	-0.528934548946934	-0.528814798291251	-0.528882803182434	-0.528740298503635	-0.528781501164198	0.442287557770142	3.44942499125157
8da18b476b64f6f053647455b6890f80	-0.0187542446805525	0.593485900299505	0.35628566773247	0.761260613549989	-0.192056706874191	-1.17085821419518	-0.22330630641506	0.27184384754672	1.43707896927246	1.78253904056854	0.176140514350014	-1.17085821419518	-0.376704730624731	3.34127122590287	0.144963914611851	0.189813015680795	0.140630395646692	-1.17085821419518	-1.17085821419518	-0.0085633664082288	0.685935231542273	-1.17000531996635	-0.523141148616173	-1.17044507618683	-0.485646972701674	0.0973410332576855	-0.641906647736526	-0.0823479731593991	-0.121268680699911	1.56099214609601	0.136338834793159	-1.17085821419518	-0.807482105805515
ad235b65ccb597f05a96b06c0ad90eee	-0.660179046747563	-0.976193213165782	3.27496676540371	1.2557260693777	2.25070480957138	-0.323137571558583	-0.976235886598485	0.0150219492933787	-0.584638506061708	-0.52463615294909	-0.385165695350805	1.00309084298236	-0.685790616354816	-0.976235886598485	-0.976235886598485	-0.622289778762355	0.114376900698433	-0.554560946052694	-0.575581314271888	-0.976235886598485	-0.650374758248095	1.28505122586055	0.349930010108552	-0.401404231052251	0.231402938422434	-0.553179883546667	0.169140910260807	-0.544933380689586	1.3712236136586	0.741464700356451	0.298277251081442	-0.652762019217572	0.239392673347596
84135a0b2ffd4bf0902d223d4ee001dc	-0.716585197438957	-0.904972098628149	3.3279871002534	1.69892860813814	1.96768428207263	0.903939855805174	0.0420689040930636	1.65401295606903	-1.26982634541654	-0.869797459218671	-0.0277912094753608	0.0530841602363468	1.06842436774526	0.083120863234176	-1.06790125709593	-0.537912449186563	-0.617459068970937	-0.570380211782189	-0.37826240362706	-0.432653008237583	-0.585198987177144	0.674608403336541	0.272932940522144	-0.417274602701917	-0.216960751651874	-0.24410825363102	-0.543009874937318	-0.433453604710894	-0.653176462527099	-0.80253044254517	-0.647787913648066	-0.176545154404204	0.366794315506732
405600e715167b5f59ca7a6438a970e2	-0.683205872204654	-0.683284022801725	-0.683326856652429	-0.466046922003175	-0.56875953385549	-0.683326856652429	-0.683326856652429	-0.185435530741614	-0.683115519895119	-0.302472695864063	-0.547048717630288	-0.278743338256312	-0.415700610262388	-0.683326856652429	-0.683326856652429	2.91768258889595	0.175088878690503	-0.0153952137617646	1.15127820126439	-0.683326856652429	-0.683326856652429	3.1544596100741	0.921593642239997	-0.192208853444593	0.995803949637465	-0.683326856652429	-0.530658901854773	0.62382410877774	0.222151665140915	0.883686907440449	1.268106283767	-0.611658393480686	-0.683326856652429
3ee3085cd6f25c2449332df3675b9eee	-0.467670743016539	2.75097928452111	1.09060929459706	0.190242245253776	-0.467327384228254	-0.468042198574388	-0.468042198574388	-0.468042198574388	-0.467392661761603	-0.468042198574388	-0.467978519182793	-0.468042198574388	3.27419511324498	-0.468042198574388	-0.468042198574388	2.16685681940636	-0.46721437681091	-0.468042198574388	1.38484573716488	-0.468042198574388	-0.468042198574388	-0.466771472041423	-0.467954136849951	-0.467424931745261	0.258010012133507	-0.468042198574388	-0.468042198574388	-0.467571844212556	-0.467838658211403	-0.467281304655488	0.579278306435933	-0.468042198574388	-0.468042198574388
234166274fbb22e38900a26eb84ece58	-0.155561834496013	-0.0602685541362513	0.0937705672315186	1.22572987723937	1.1743379274842	0.469906717523869	1.76538134664149	-1.55483030744075	-0.514327672017755	-0.354888855392466	0.0156858655945191	-0.28085575895657	0.244987216583886	-0.0580126833510195	0.40549321730791	-1.55463970304001	0.743363568284126	1.21993458295484	-0.678255091230774	-1.55483030744075	-0.592781935004529	-1.55372267862885	1.38156881257248	0.959586176683079	-0.871951489203993	-0.690149059493401	-0.574856665692297	0.383816988739014	1.96367125845225	1.12057557720173	-0.667055159151518	0.104008361623395	-1.55483030744075
f5e65944985d39991cba3fab949a0150	-0.904369718272574	-0.904480067897855	2.7851637484369	2.50124184441782	1.22422747086196	0.431054659532098	1.42143453269081	-0.135216421844512	-0.904241514441402	-0.904540411421578	-0.0213621618968911	0.113837767546713	1.46908375817423	-0.904540411421578	-0.904540411421578	0.25364868548756	0.0538784884453444	-0.590765039344757	-0.203813358931576	-0.904540411421578	-0.904540411421578	0.260125858525838	-0.278725563266711	-0.330009630560017	0.0775276610766908	-0.904540411421578	-0.904540411421578	0.785014636330523	0.203237972677883	-0.107540066131857	0.94191016117798	-0.904540411421578	-0.904540411421578
c220411c349b8a75624ff17ef6fd3923	-0.513302872174508	-0.513466260366155	-0.51355618804348	-0.513007604765834	1.0841741325618	-0.51355618804348	-0.51355618804348	-0.51355618804348	-0.513115646781852	-0.51355618804348	-0.513512575180775	-0.51355618804348	-0.513290049508997	-0.51355618804348	-0.51355618804348	1.43136873520396	1.74890626850963	0.56561639943331	-0.132029686810664	0.388259440693916	-0.51355618804348	2.72034990199504	-0.513489899743944	-0.513090400732141	1.44913405010541	-0.51355618804348	-0.51355618804348	-0.513201516021019	-0.513402887287058	-0.512981167428642	3.06631208286376	-0.51355618804348	-0.51355618804348
f7799679d96d83cb801a28d2bea7e038	-0.45038306871758	-0.450436624912495	-0.450466022791781	-0.45028566194585	-0.450306787299423	-0.450466022791781	-0.450466022791781	-0.450466022791781	0.30372361549753	-0.450466022791781	-0.45045177254265	-0.450466022791781	-0.450378832138356	-0.450466022791781	-0.450466022791781	-0.450413623638892	-0.450268016649234	1.86127508526118	0.698711958780673	-0.450466022791781	-0.450466022791781	-0.450161274091912	-0.450445048807948	1.73679016505748	-0.450440371543757	1.46685493515265	1.92985435146281	-0.450353736317572	-0.450417508298876	-0.450283838252291	-0.450322499590015	-0.450466022791781	3.71326480424412
515ece14bce1a14e906c0282d86acb76	-0.249829581564841	-0.250009753369657	-0.250108486221588	-0.249500563162443	-0.24957220285851	-0.250108486221588	-0.250108486221588	-0.250108486221588	-0.249621197653495	-0.250108486221588	-0.250060641541228	-0.250108486221588	-0.249815258188005	4.03864020580297	-0.250108486221588	-0.249945284618027	-0.249494850693727	-0.250108486221588	-0.250108486221588	-0.250108486221588	-0.250108486221588	-0.249168386099647	-0.250043001192299	-0.24965059835807	-0.250028434197771	3.70854303030095	-0.250108486221588	-0.249759326025847	-0.249957213741513	-0.249544891875115	-0.249663243861495	-0.250108486221588	-0.250108486221588
8ac6eb8f6cb6cb09ec627e2a9cc972bd	-0.476059980928569	-0.476161668394621	-0.476217285026235	-0.475873421712302	-0.475914227198542	0.757824593037208	-0.0839295748707665	1.69901978481906	-0.475941885776973	-0.476217285026235	1.58507342652427	1.44583669184879	3.69764469067934	-0.476217285026235	-0.476217285026235	-0.476125122626831	-0.475869780443744	-0.476217285026235	-0.476217285026235	-0.476217285026235	-0.476217285026235	-0.475683523874114	-0.476180355569404	-0.475958226830478	-0.476172129121166	-0.476217285026235	-0.476217285026235	0.823252196496009	-0.47613191332259	-0.475897798060492	1.97785564564074	-0.476217285026235	-0.476217285026235
f417c17862db401c41c77faea54cc3c3	-0.794858326962511	-0.794938421940608	0.834551654889434	0.426103403679696	-0.794743517121282	-0.794982227601853	0.825887845118674	0.785842560145436	-0.794765302703925	-0.794982227601853	1.67316006409039	0.749171721447074	-0.794851922882211	-0.794982227601853	-0.794982227601853	-0.794908148753575	-0.794702337217018	0.165643608342767	-0.794982227601853	0.372115463012765	1.92716465498161	-0.794551507701552	-0.794952573797069	0.110032349542423	0.263351135740064	2.08696491496176	2.23272958737586	-0.794823490742439	-0.794913638509227	-0.794724714680466	-0.794779345453369	1.11098216088938	0.743723262257192
958d78a02bef69a795806f97adb117ea	-1.3648634493161	0.24171952455763	1.88058144243097	1.82689620113282	2.12856987490314	-0.00954992370539082	0.103325424850361	-0.17069588445861	-1.36469433435773	0.69160723902651	-1.36505006279093	0.595089977114035	0.080882799596403	-0.0121668939347845	-1.36508862341619	0.989252345781985	-1.36458124966758	-0.494432777052455	-0.264269331539565	0.288876529871664	-1.36508862341619	0.709401965216104	-0.00849876176951952	-0.165164085348499	0.602689959913324	-1.36508862341619	-0.53805662696744	-0.125979576700267	0.434008014630943	1.23478496601923	0.27890396096927	-1.36508862341619	0.62176722525925
e2bc41d7bb14564d77567a24bb117ee7	NA	NA	NA	NA	NA	NA	NA	NA	NA	NA	NA	NA	NA	NA	NA	NA	NA	NA	NA	NA	NA	NA	NA	NA	NA	NA	NA	NA	NA	NA	NA	NA	NA
d93a3ef54cd04d16c30a94e15287caf4	-0.173497677936094	-0.173962654026534	-0.174218081440187	5.57048464007285	-0.17283627856244	-0.174218081440187	-0.174218081440187	-0.174218081440187	-0.172962684827045	-0.174218081440187	-0.17409424889713	-0.174218081440187	-0.173460978378752	-0.174218081440187	-0.174218081440187	-0.174218081440187	-0.174218081440187	-0.174218081440187	-0.174218081440187	-0.174218081440187	-0.174218081440187	-0.174218081440187	-0.174218081440187	-0.174218081440187	-0.174218081440187	-0.174218081440187	-0.174218081440187	-0.174218081440187	-0.174218081440187	-0.174218081440187	-0.174218081440187	-0.174218081440187	-0.174218081440187
0f2a5acc53e55f2c9f0c7409421dc5a0	-0.254529008009753	-0.124853212070754	1.61374723804438	2.20318582511227	3.38267331814639	0.241104133450826	1.52389544805982	-0.830949636250402	-0.0276082412766655	0.373840922149469	0.678263718979033	-0.240826002865605	1.2336086640828	-0.126443344086715	-0.251765425427733	-0.43156269593862	-0.830512031120948	-0.830949636250402	-0.560382672630506	-0.307725137151072	-0.474385039849139	-0.83027729803349	-0.312600199520339	-0.830623442472781	-0.493454128887347	-0.830949636250402	-0.498533864297863	-0.830701159999828	-0.830842168551804	-0.83054727031071	0.313444116781442	-0.565836249557508	0.583094116003961
096aa868afaffdd4bd938b9faa623a2a	-0.730605765039708	-1.09808976717633	-1.09815225994271	-1.09776691499968	-1.09781243730639	-0.935754145115745	-0.302009801494785	-0.333022198323668	-1.09784347210493	-0.54942292308197	-1.09812198053568	-1.09815225994271	0.00999984095298452	-1.09815225994271	-0.474676730910193	1.41458803527757	0.251520641130025	0.429453804857179	0.981888040696739	-1.09815225994271	0.688477735698576	0.562680846198835	0.837433599908994	0.822160293177691	1.05315663424793	-0.0277216938065007	1.16714985042578	-0.304594047403446	1.0168673058655	-0.123316755677322	2.8935979050958	0.284878948990558	1.24951419022302
3c26b759c265509da510b6b648bae9c3	-0.250115915967715	-0.250115915967715	-0.250115915967715	-0.250115915967715	-0.250115915967715	-0.250115915967715	-0.250115915967715	-0.250115915967715	-0.250115915967715	-0.250115915967715	-0.250115915967715	-0.250115915967715	-0.250115915967715	-0.250115915967715	-0.250115915967715	-0.249983772675766	-0.249617265104225	-0.250115915967715	-0.250115915967715	-0.250115915967715	-0.250115915967715	-0.249349434962561	-0.250062986706354	-0.249744280705616	-0.25005119145727	-0.250115915967715	-0.250115915967715	-0.249832872494715	-0.249993531089414	-0.249657338404167	-0.24975437018864	3.75845407854341	3.99202720056733
b9601452981d5393bd6c0ed100a35ff0	1.02061240174498	1.49105198419549	-1.04543514697884	-1.04507490760342	-1.04511766344303	-1.04543514697884	-1.04543514697884	-1.04543514697884	0.383030176250082	1.19686453261334	-1.04540692535088	-1.04543514697884	-1.04526184501417	0.680946220551298	1.54582365625023	-0.621377013566182	-1.04506285029372	-1.04543514697884	-0.432297564133869	0.603378943964529	1.13610281525533	0.0814232275560431	0.0786300373142931	0.574207491440179	-0.130703583502711	1.49433922398959	2.4733516071709	-0.54569997982566	-0.056317620343293	-0.193311441849107	-0.504887958550023	0.569707196244012	0.653660720808817
76b219eb7351347070ab7205275b9c02	-0.613041942013149	-0.613162947229716	1.04130684227734	-0.61282021597823	-0.612868654989792	-0.613229163393208	-0.613229163393208	-0.613229163393208	0.919577930084069	0.892396767206434	-0.613197084228865	-0.613229163393208	-0.613032282231398	-0.613229163393208	1.95223763012078	-0.300926014743066	-0.612805295412251	0.466553235243937	0.496045888760986	-0.613229163393208	1.48790625077295	-0.612577183392514	-0.613184221708873	-0.61291334183584	-0.613174202780246	1.98946689734888	1.99763178144168	-0.612988689022976	-0.613125227321731	-0.612839254803096	-0.612921885491373	2.54505936367851	-0.613229163393208
2616210b023c8ff2ff5ac0c1ae00b1bc	-0.356726792400778	-0.356838677495678	4.51511040415462	2.25396911117063	1.33341506776714	0.479193836659779	1.04258965356323	0.0112695994756196	-0.356596870474256	-0.356899875176874	-0.35687022974348	-0.356899875176874	-0.356717848785608	-0.356899875176874	-0.356899875176874	-0.356899875176874	-0.356899875176874	-0.356899875176874	-0.356899875176874	-0.356899875176874	-0.356899875176874	-0.356899875176874	-0.356899875176874	-0.356899875176874	-0.356899875176874	-0.356899875176874	-0.356899875176874	-0.356899875176874	-0.356899875176874	-0.356899875176874	-0.356899875176874	-0.356899875176874	-0.356899875176874
c3ff4c29778c6c86865687a4061a3382	-0.653788243847762	-0.653851268108407	-0.653885740671112	-0.653672635767632	-0.653697918437593	-0.653885740671112	-0.653885740671112	-0.653885740671112	0.747488721225147	1.77507523032923	-0.653869041420894	-0.653885740671112	-0.156622963444191	0.390972686935991	-0.0812979239751705	-0.312875103471607	0.139550818061961	-0.203560095004484	-0.290531121875514	-0.653885740671112	-0.653885740671112	2.24785496921823	-0.167083368742948	-0.351994030746993	1.43081413360466	-0.653885740671112	-0.653885740671112	2.27809665562186	0.24971814968222	-0.148888145055138	2.91490364260126	-0.653885740671112	-0.653885740671112
4115cd19d50e5a6b8550c3a1f9a6c75e	-0.0769414447108681	-0.363911630328211	0.629072879726264	0.749303464459755	3.11529969885294	0.14817717934349	3.09658163359967	1.20192081972921	-0.310659720249371	0.185459624979326	0.173891982118962	-0.849028428749784	0.333135101346764	-0.849028428749784	0.0326418720843711	-0.848898538335472	-0.848538385203716	-0.0349638215300116	-0.849028428749784	0.124511686562066	1.34097575342851	-0.848275328630524	-0.386077622033848	-0.848663181679882	-0.848964802242371	-0.0141674066053429	-0.0367182460321026	-0.848750230292302	-0.407636568768494	0.0190070795772046	-0.848673107997535	-0.553095566057017	-0.477957888862118
48d8be76001a9d251dc030b142483539	1.4449743286747	0.390899004487528	-0.939686054273277	-0.93932086967563	-0.939364220623145	-0.335998745839925	0.118461625026462	-0.939686054273277	1.5464505379803	1.48813109696214	-0.119983343098074	0.0580310947793097	-0.0450012390702139	0.325236477754693	-0.939686054273277	0.501678505850212	-0.939309420409722	-0.939686054273277	-0.580284742793301	-0.939686054273277	-0.939686054273277	1.45500076872023	-0.939646146155836	-0.939405467258537	0.52127526748527	0.369127145612072	-0.248743734089364	2.09463520666637	-0.939593748866746	-0.93933954212903	1.29019562337905	-0.106049239923258	2.04606010219412
ce78414357068359ddae6a47b6592a08	0.106947948344503	0.114006391663832	0.97347084607289	2.835517546826	2.76692781014562	1.0710569817894	0.647244725587021	-1.22689352430814	-0.152497474738129	-1.22689352430814	-0.644625625347054	-0.24038191147521	-0.246186985404594	-0.207763778733698	-1.22689352430814	1.06927191363928	1.34402776209708	-0.946790478165983	-0.630235172830716	-0.329849976573785	-0.401540506406632	0.128557781085238	-0.586960799870593	-1.22638331646547	-0.575938214621013	-0.814775626163198	-0.433193442855362	0.369161380028743	-0.311831223721194	0.798422107362639	-0.303837664389214	-0.290376923777813	-0.200763500178172
ece8f3889c05b3350152571f8dda9ab7	-1.36193384730761	-0.365724355119097	0.290757963099117	0.335447785986274	0.337923332788617	0.907608174708548	1.42478082915642	1.08238590911595	1.50781143150605	0.338083791492535	1.52829932470549	-0.32098475108849	0.356377490644768	-0.0572214171572914	0.19826953581762	-0.388694043814164	-1.36158701656666	-1.3622130191027	-0.215407722850718	1.1814191890098	0.31548874714848	-1.36125014378304	-0.411215122958459	-1.36174658446458	-1.36213184608687	1.12564379932722	0.778558587041128	0.404586203899784	-1.36205951336789	-1.36163717553316	-1.36175920399298	1.21079540170195	0.69132826604397
5a84cbca09090824be95118781802f82	-0.504616305064576	-1.29673765804835	-0.387113833870669	1.45660197370844	2.83873816232721	0.668053281768991	0.895353528865483	2.16675452237401	-0.707558394232345	-1.29683349197735	-1.29678706786496	0.258639769860749	-1.29654844779605	-1.29683349197735	-1.29683349197735	-0.54822830065568	0.569790713542526	0.155953761862563	-0.28653865132852	0.38114141558675	0.255270350471668	-0.089316020867592	0.199141989208022	1.1429141435753	-1.2967541932713	-0.0487482138655414	0.411394743963533	-0.249030166676096	-0.142322711724925	-0.160083462852693	0.483313807902772	0.529292345383478	-0.211470606350121
1e66289327edd690ec0ad509d4257101	-0.968163518939272	-0.968294668208397	-0.129817253184032	-0.967922970448411	-0.967975571547858	-0.968366406296181	-0.968366406296181	-0.374395881365958	0.904018316321998	0.844317771570908	-0.968331654558776	1.31190674944198	0.175941029137733	1.25259518562238	0.494856999456366	-0.40775114701161	-0.268872969100981	-0.968366406296181	-0.968366406296181	0.527598893458019	2.94725440122842	-0.967661171318939	-0.96831783284066	-0.968024932005809	-0.360536886538754	1.50578385289158	0.779706582372091	-0.183686792765462	0.201273020950401	-0.117064554857368	0.467240840250082	1.6898250108342	0.357964776340858
ecb3759e804e8c86d9fb0de817207fe9	0.820709715006583	0.230082475266924	2.35893896180123	1.32771531571691	1.98748080284052	1.65781793730834	0.037018466351322	0.613430752539472	0.59008565953984	1.6915684852708	-0.915634082770619	-0.915668162674136	0.467211273167522	0.765334933319613	-0.33383423527193	-0.915551293354526	-0.915227251571965	-0.915668162674136	-0.410406029633151	-0.915668162674136	-0.915668162674136	-0.914990579583399	-0.915621346003608	-0.915339533977335	-0.91561091414893	-0.110708771826077	-0.915668162674136	-0.915417854030626	-0.915559918171423	0.157677979425901	0.73347956711021	-0.229235123036486	0.462925422085551
8e6f1849d93723676dff6cb1962941a8	-0.484095150200659	-0.48421391834948	3.03669474908969	3.84192147043713	0.0224365904881135	-0.484278893158741	-0.379074098077361	-0.484278893158741	-0.483957291424391	0.164828436975296	-0.484247416911043	-0.484278893158741	-0.48408566165076	-0.484278893158741	-0.484278893158741	0.0582161103216882	-0.483867947604889	-0.178507104283172	1.46954987669999	-0.484278893158741	0.0708400116666405	-0.483647231655058	-0.484235272611901	-0.224653880371169	-0.484225551860005	0.563496892832615	0.849000088476351	-0.484045631000062	-0.484178032524702	-0.483900974190876	-0.483980937221184	-0.272158564272761	0.175763796174407
1b5aa72a8971f998f5ca89390e6fefb7	-0.516172126577466	0.239635655136184	-0.516281605035065	-0.516044396863026	-0.516071946648252	-0.516281605035065	-0.516281605035065	-0.516281605035065	-0.516091142075078	-0.516281605035065	-0.516262761751927	-0.516281605035065	-0.516166578508589	-0.516281605035065	-0.516281605035065	4.05975094860887	2.36372827945602	0.0801993840162232	0.304792973323766	-0.516281605035065	-0.516281605035065	0.54809350854131	1.08605636646465	-0.516079846781099	0.301892819192118	-0.516281605035065	-0.516281605035065	0.440700021968528	0.59184994103211	1.34021666013859	-0.516085288182013	-0.516281605035065	-0.516281605035065
9afd42dd378444442546f48115a951ec	-0.64214759668646	-0.642231677853362	2.33417215001684	-0.641993253100331	1.68981041169393	2.83972285465452	0.155056887001762	1.73619664629337	-0.642049900752705	-0.642277654389986	0.737926086144993	-0.642277654389986	1.37348307396518	0.167270505666669	-0.642277654389986	-0.642201026616223	-0.641988471893481	-0.642277654389986	-0.642277654389986	-0.642277654389986	-0.642277654389986	0.596811346912551	-0.0637407227130342	-0.64206213778595	-0.642240122865132	-0.642277654389986	-0.304411236558549	-0.642113517820514	-0.642206686625138	-0.290855397585187	-0.642067986605286	-0.0938541249300527	1.32393513316148
4ae33466f29277f3cba0834c894ee4a4	-0.35745457532713	2.41999082510211	-0.357529684732985	-0.357365426655566	-0.357384938975768	4.1806332079455	1.98963447437882	0.955226970556104	-0.357398147152996	-0.357529684732985	-0.357516823756538	-0.357529684732985	0.464817182744118	-0.357529684732985	-0.357529684732985	-0.357529684732985	-0.357529684732985	-0.357529684732985	-0.357529684732985	-0.357529684732985	-0.357529684732985	-0.357529684732985	-0.357529684732985	-0.357529684732985	-0.357529684732985	-0.357529684732985	-0.357529684732985	-0.357529684732985	-0.357529684732985	-0.357529684732985	-0.357529684732985	-0.357529684732985	-0.357529684732985
924668f542df9de35c2226e4a6cf09bd	-0.404177712615225	-0.404334125717548	4.17243804933868	1.99003345884524	1.66981344975043	-0.404419698185649	1.09093495112778	-0.404419698185649	-0.403996172085654	-0.404419698185649	-0.404378243376686	1.35243430346118	-0.404165217898755	-0.404419698185649	-0.404419698185649	-0.4042950955364	0.64019788283858	-0.404419698185649	-0.404419698185649	-0.404419698185649	-0.404419698185649	-0.40371448935732	-0.404369471362141	-0.404072246769338	-0.404358351018329	-0.404419698185649	-0.404419698185649	-0.404153920808391	-0.40430395993942	-0.403994754637738	-0.404082257825512	-0.404419698185649	-0.404419698185649
e3811dd729c742150d8c1c5f6e40c5a9	NA	NA	NA	NA	NA	NA	NA	NA	NA	NA	NA	NA	NA	NA	NA	NA	NA	NA	NA	NA	NA	NA	NA	NA	NA	NA	NA	NA	NA	NA	NA	NA	NA
b9ed1a2c86edb972db7742981e6901da	0.109920892782769	0.320352090783105	-1.20585637294351	0.905587425528755	0.169593260853516	-0.683399149138798	-1.20585637294351	-0.0999807339888129	0.298453219622534	1.15491377314536	-0.069779108482137	-1.20585637294351	-1.20549389441416	0.263624876933133	-1.20585637294351	2.61876314899005	0.854466830644065	-1.20585637294351	-0.322729702082653	0.121558184840554	0.255626250292401	0.337181684914998	-1.20577360267232	-0.620228946102885	-1.20575514887739	1.23356390621732	0.284014270865738	0.802075096276598	-1.2056649419844	0.843963546839263	0.194643265097011	-0.273327444302969	2.15311281213688
a6ccec9ec008fe4a2f332209583c4012	1.90195749250977	2.09959421015127	-1.05930578325717	-1.05872191478187	-1.05879120199419	-1.05930578325717	-0.341855461299589	0.0054943720471059	2.19773626461362	0.319760681097536	-1.05926003773603	1.33783943288607	-0.414315806668498	0.310783601806568	1.43377954902856	-0.0279747537429404	-1.05870639303375	0.321703047077164	-0.0123669559493087	0.27773635630771	1.91608516269168	0.128877458310113	-0.287933886081106	-0.15812141955139	-0.488609369507297	-1.05930578325717	0.211835291990275	-0.543284956358502	-1.05915878495361	-0.269255542376369	-0.115430707242279	-1.05930578325717	-0.27217259621202
b155d97b79acc3086ce118451afa0124	0.130725337024819	1.0243118920682	-0.790400290477551	-0.789773948605084	0.697301224899751	1.7195839043508	0.200926733828959	1.80267522848609	-0.789898640417234	1.83562466199774	0.227648339785526	-0.790400290477551	1.13238312241997	2.47257107201324	-0.790400290477551	-0.790232574309041	-0.789768027781129	-0.790400290477551	0.109530713786769	-0.0302361704473266	-0.790400290477551	-0.789429319257309	-0.79033308027099	-0.789928919569176	-0.238852607477403	0.0632935226320815	-0.130387258306311	-0.790041166816986	-0.790244925170504	-0.789819044422422	-0.789941777270091	-0.184148754848114	1.80846191406294
0dd0551c0dd279c12d8a31ad016f0a7b	-0.249009783139599	-0.2492801838916	-0.249428387775679	-0.248516204085482	-0.24862363016123	4.18554191722382	-0.249428387775679	3.54321121599228	-0.248697159714461	-0.249428387775679	-0.249356567729294	-0.249428387775679	-0.248988297878125	-0.249428387775679	-0.249428387775679	-0.249428387775679	-0.249428387775679	-0.249428387775679	-0.249428387775679	-0.249428387775679	-0.249428387775679	-0.249428387775679	-0.249428387775679	-0.249428387775679	-0.249428387775679	-0.249428387775679	-0.249428387775679	-0.249428387775679	-0.249428387775679	-0.249428387775679	-0.249428387775679	-0.249428387775679	-0.249428387775679
a11124bead20d177c53e9a515457c0c0	-0.501218748467045	0.770796938666204	-0.501423581526189	-0.500977035161654	0.778741314342497	-0.501423581526189	-0.138537571973741	-0.501423581526189	-0.501065663983411	-0.501423581526189	-0.501388446767349	0.495799585373035	-0.501208225159781	-0.501423581526189	-0.501423581526189	-0.501298579803004	-0.500951586047404	-0.501423581526189	-0.501423581526189	0.737193890621419	-0.501423581526189	-0.500697654719979	-0.501373527991028	-0.501071886059739	-0.501362370139665	1.54711096244927	1.79488124396695	-0.501155780913277	-0.501307827026823	-0.500989420185811	-0.501081405719067	3.22324372499086	2.82073030344424
d38b6fe0cdccc979c0b8720e3d5f39f5	-0.579440085019019	1.24190462282482	-0.579572840983175	-0.579283802217992	-0.579317770273553	-0.579572840983175	-0.579572840983175	-0.579572840983175	-0.579341082978713	-0.579572840983175	-0.579550053033773	-0.579572840983175	-0.579433284245433	-0.579572840983175	-0.579572840983175	0.842021561632013	-0.579260758737962	1.00181374029403	3.64468510090525	1.57546928480688	1.24954587327131	-0.579092575107512	-0.579539777214807	-0.579340351165291	0.68878464436916	1.21367099384688	0.926516488982477	0.943044336580129	-0.579496364377991	-0.579285708502833	-0.57934662480634	-0.579572840983175	-0.579572840983175
3ab2e807caf3d5ad8b24c4e6220d6b21	-0.30940877746785	-0.309573383749568	-0.309663463239312	3.03625720668761	-0.309173069628042	-0.309663463239312	3.55105164505066	-0.309663463239312	-0.309217838902399	-0.309663463239312	-0.309619822857046	2.70100279738371	-0.309395638773586	-0.309663463239312	-0.309663463239312	-0.309663463239312	-0.309663463239312	-0.309663463239312	-0.309663463239312	-0.309663463239312	-0.309663463239312	-0.309663463239312	-0.309663463239312	-0.309663463239312	-0.309663463239312	-0.309663463239312	-0.309663463239312	-0.309663463239312	-0.309663463239312	-0.309663463239312	-0.309663463239312	-0.309663463239312	-0.309663463239312
c5aad5ebe154556c8422b669638c0745	-0.622583008697755	-0.622705931626909	1.24252508349928	2.4655461427296	3.08892230981152	-0.622773165650066	1.39106134488012	-0.622773165650066	0.151383887842596	-0.622773165650066	-0.622740596176628	0.23066858879269	-0.622573182332558	-0.622773165650066	-0.11532521904875	-0.622660498465129	-0.622347904478199	-0.622773165650066	-0.622773165650066	-0.622773165650066	-0.622773165650066	1.39111905650811	-0.622728042854453	-0.62245625271962	0.718477037662056	-0.622773165650066	-0.622773165650066	0.740677843154577	0.66265336620237	1.10882880953125	-0.622464846413396	-0.622773165650066	-0.622773165650066
a69c0a328e1b282389062478c5d49c3a	-0.18495768418822	-1.51462952391444	1.22665078042115	0.247728517027311	-0.278486573334172	0.469651052493089	0.527155352637075	1.4453580285197	-1.51392676942367	-1.0402690582229	0.972118898396884	0.755441551121588	0.656650096280293	-0.950637997514165	-0.0301854145972851	-1.51450715503847	-0.247309985431461	1.75766977980472	-0.722097231680659	-0.47173836870348	-0.296097117737633	-0.300573420790498	1.40804201800886	0.0505720358010554	-0.00105862320050989	-1.51480750543489	1.05000845363922	0.717983248380285	1.90421704767749	-1.0143605004668	-1.51398543273469	-0.0563103531419089	-0.0233081446528697
969d4c97ed0f7d183e7530340867e86f	-0.701777261358079	1.39165498193139	0.0909433967610276	0.232289037853536	-0.701641546075887	2.43488748964839	-0.0269650485046523	1.16641085038776	-0.0270280702118939	-0.701923719462757	-0.701898636308087	-0.701923719462757	0.51476233117895	-0.0489941961507674	-0.701923719462757	-0.701836522804016	-0.70159440000483	-0.701923719462757	-0.701923719462757	-0.184693303872233	1.23725174724788	-0.701417124309635	-0.701888807688025	-0.701678353703881	-0.701881024360445	2.03090735889026	0.850643481511008	-0.701736898163538	-0.70184297732725	-0.701620773553904	-0.701684988205346	0.311494974254014	2.65855288025203
dd3f1d27af1be908d3c3fd143339aa9c	1.488666349558	3.66079998831095	-0.527510789267324	-0.527230315864652	-0.527263619198441	-0.527510789267324	-0.527510789267324	-0.527510789267324	0.8599904702458	0.914364632412461	-0.527488822865144	-0.527510789267324	-0.527375882747901	2.72652347822217	-0.527510789267324	-0.527435251679607	-0.527225760310237	-0.527510789267324	-0.527510789267324	0.113117688143197	0.474270693273205	-0.527072692393018	-0.52748053223596	-0.527298358230462	-0.52747378967536	0.649737462117843	-0.253039616191241	-0.527348995104444	-0.527440828993368	-0.527248671759061	-0.527304127123466	0.309830151647118	0.658512664580206
bf7348b2028d96bee8686238f2bc5aa2	0.451257615565726	2.26836239879803	0.431329433069595	-0.205246134532539	-0.286331497210875	-0.759977198293795	-1.00118407278781	-0.827743293161415	0.0107990943094499	0.29695264932617	-0.968873155507043	-0.779542041492495	-1.00351080544229	0.788008088734382	0.937398825931945	0.128663382587844	0.467363820472762	1.62944722061369	0.476282858481489	1.55981977297161	0.779280040128723	0.290002834201005	-0.276709848765143	-0.908582881496042	-1.87265544884892	0.796035154987703	1.30429641301351	-0.74606389148192	-0.0359179004466523	-1.52273605408251	-1.85746918304901	-0.29455379724312	0.731797600647954
fe9a3e2c5c45bec637506a2ae1eb243c	-0.453426083764571	-0.453550344618489	3.5618391160852	1.10674334596095	2.35819941897127	1.57571759874373	-0.453618305497613	0.312406646987129	-0.453281763969667	-0.453618305497613	0.962697697296301	-0.453618305497613	1.91587539475325	-0.453618305497613	-0.453618305497613	-0.453618305497613	-0.453618305497613	-0.453618305497613	-0.453618305497613	-0.453618305497613	-0.453618305497613	-0.453618305497613	-0.453618305497613	-0.453618305497613	-0.453618305497613	-0.453618305497613	-0.453618305497613	-0.453618305497613	-0.453618305497613	-0.453618305497613	-0.453618305497613	-0.453618305497613	-0.453618305497613
97c1df5666160d3b6dd2bc9ac1c90af0	NA	NA	NA	NA	NA	NA	NA	NA	NA	NA	NA	NA	NA	NA	NA	NA	NA	NA	NA	NA	NA	NA	NA	NA	NA	NA	NA	NA	NA	NA	NA	NA	NA
c803726dac1aad6846d209e915cea275	-0.787503981651285	-0.787640936945363	2.3889279591548	3.0259742321852	0.313263046101285	-0.787715852908118	0.600218725521636	-0.336552521361447	0.593402277343487	-0.787715852908118	-0.787679561549803	-0.417893829065062	-0.16126127959783	-0.787715852908118	-0.787715852908118	1.70959870385383	1.79927990464435	-0.787715852908118	0.0443434152839895	-0.787715852908118	-0.787715852908118	0.809244591233546	-0.118892398571467	-0.78736001715055	-0.0620433736574731	-0.787715852908118	-0.787715852908118	0.499957679201301	0.00925915705235963	0.258165992172393	-0.787369638704596	-0.257673017548495	0.329677548228254
7f86fe47ae4b09efb9edc6826f727868	-0.252707437544243	-0.252707437544243	-0.252707437544243	-0.252707437544243	-0.252707437544243	-0.252707437544243	-0.252707437544243	-0.252707437544243	-0.252707437544243	-0.252707437544243	-0.252707437544243	-0.252707437544243	-0.252707437544243	-0.252707437544243	-0.252707437544243	-0.252668429115909	-0.252560046605349	-0.252707437544243	-0.252707437544243	-0.252707437544243	-0.252707437544243	-0.252480610429208	-0.252691822773726	-0.25259763776686	-0.252688340798258	0.452833204976075	0.899537880014828	-0.252623848757038	-0.252671320257202	-0.252571828544691	-0.252600600259556	0.612468899948322	5.36275581370918
d3d0b6aba6f97f1ba77a412531587a84	0.168567676876068	-0.747518284716088	0.333336947551734	-0.746906675139874	-0.746992510162632	-0.747637112915678	-0.747637112915678	-0.747637112915678	-0.747051425607773	0.318204122540418	-0.271112465732091	-0.747637112915678	-0.747284425331974	-0.747637112915678	0.276411077569308	-0.747429625607264	0.889868420095299	1.76740546526662	1.44233046319617	-0.747637112915678	-0.747637112915678	1.2818562898657	2.27619042296214	1.31213819807571	-0.747535509973534	-0.747637112915678	-0.747637112915678	0.40774889590156	2.57109297531923	0.370765792697555	0.309922416426168	-0.747637112915678	-0.747637112915678
20ffb1eb28a74810e0c5fd95825aacb5	-0.348135096128213	-0.348135096128213	-0.348135096128213	-0.348135096128213	-0.348135096128213	-0.348135096128213	-0.348135096128213	-0.348135096128213	-0.348135096128213	-0.348135096128213	-0.348135096128213	-0.348135096128213	-0.348135096128213	-0.348135096128213	-0.348135096128213	-0.34808826934528	-0.34795816460434	-0.348135096128213	-0.348135096128213	4.49170079074441	-0.348135096128213	-0.347862808399448	-0.348116351700939	-0.34800328976465	-0.348112171842599	2.25635196397313	0.818417432983485	-0.348034753972119	-0.348091739918081	-0.347972308113054	-0.348006846070778	1.47368080666822	0.706527439669871
36d9f553b6f26520e7a6f8671cdde1f5	-0.435793847144067	-0.43592790166281	-0.436001339131943	-0.435548857417607	-0.435602240928185	-0.436001339131943	-0.436001339131943	-0.436001339131943	-0.435638696252941	-0.436001339131943	-0.435965754358138	-0.436001339131943	-0.43578318002232	3.21344957207906	-0.436001339131943	-0.435875454028811	-0.435526141620491	-0.436001339131943	-0.436001339131943	1.81579443732909	0.842921688257731	-0.435270677660004	-0.435950924961261	-0.435647224113654	-0.43593968828785	-0.436001339131943	2.7358213712524	-0.435731670516771	-0.435884759244107	-0.435564276533442	-0.435656822207985	1.40333575269962	1.75599868666198
4e1bda045e6ba843353281138c649093	-0.707364131708496	-0.707514767293435	1.82760567720008	3.35898898388382	0.862070105816695	-0.707597177874907	0.596942475712847	0.162968758521691	-0.707189292089052	0.500531459104462	-0.707557254906628	-0.707597177874907	-0.707352098067598	-0.707597177874907	-0.707597177874907	1.09867265740331	1.85071833553352	-0.707597177874907	0.806212891110073	-0.707597177874907	-0.707597177874907	-0.226178829516545	-0.707541511674997	0.0818140764129425	0.0921682693621015	-0.707597177874907	-0.707597177874907	0.066818128708085	0.463389832502555	1.19258183897985	-0.707216648371319	-0.707597177874907	-0.707597177874907
6f1cbae792de3e1162d3d7dffbe4bb20	4.3380033288642	2.49033448866482	0.0478030591871989	-0.50422582103539	-0.122941377221828	-0.504616220675408	0.318499533405247	0.207045179277381	-0.504303554754042	-0.504616220675408	-0.163435341057261	-0.504616220675408	1.45752933495973	0.291631922764413	-0.123773437726864	-0.504513752991587	-0.504230620320502	-0.504616220675408	-0.294858905680851	-0.0840705426055833	-0.0746574484015129	-0.504025019246236	-0.504575122216549	0.195990579683084	-0.504565976104388	0.268211580090822	-0.175658121728501	-0.50439693737418	-0.504521260806776	-0.504261959424111	-0.504336484148274	-0.504616220675408	-0.504616220675408
c67805e12dc927c5b3ba6b192381ecf7	-0.423733368456522	-0.423818908788625	3.66231046929515	3.09578624421242	0.50218602423079	1.92613853643458	0.413354284883802	0.418189676265669	-0.423633988184328	-0.423865685658068	0.152670511331576	-0.423865685658068	0.425595603252983	-0.423865685658068	-0.423865685658068	-0.423865685658068	-0.423865685658068	-0.423865685658068	-0.423865685658068	-0.423865685658068	-0.423865685658068	-0.423865685658068	-0.423865685658068	-0.423865685658068	-0.423865685658068	-0.423865685658068	-0.423865685658068	-0.423865685658068	-0.423865685658068	-0.423865685658068	-0.423865685658068	-0.423865685658068	-0.423865685658068
2a89717b521dc276ae1bd08090909dc4	-0.941641170976366	-0.475585831597046	1.49380129255959	1.37535222867192	1.78998837064472	2.05344003488202	1.29315171405806	0.538369578114217	1.22404579611392	0.649194142385076	1.70190604273679	0.204342448660193	1.45997463708202	-0.455979839740255	-0.941883870984495	-0.363238682754127	-0.184931354562609	-0.495496412176381	-0.941883870984495	-0.941883870984495	-0.941883870984495	-0.94106231493897	-0.94182703062918	-0.941485136092516	-0.94181436876789	-0.483353484397696	-0.941883870984495	0.325400900886603	-0.0332485701974091	-0.464488937608871	-0.269997269780585	-0.523513556668255	-0.941883870984495
9e31424bebb25a100572229efc973274	-0.457598370830069	0.00082513965324363	1.63853225224952	3.55845674633133	3.06747525052532	1.11409079849887	0.82484833479105	0.0130135644206475	-0.45751981927881	-0.457702934338885	-0.457685029567519	-0.457702934338885	-0.457592962100746	-0.457702934338885	-0.457702934338885	-0.457642784771837	-0.457476456261728	-0.457702934338885	-0.457702934338885	-0.457702934338885	-0.457702934338885	-0.457355520007003	-0.457678815752505	-0.457534018671199	-0.457673446859572	-0.457702934338885	-0.217564569503131	-0.457574189432042	-0.457647198977328	-0.457494821295517	-0.457538652950766	-0.136740848768287	0.662401827608049
6c921e3ae0af506f54295d074ca071bc	-0.34350889582378	-0.343755388308081	-0.343890450364626	-0.343058654274776	-0.343156712781037	-0.343890450364626	-0.343890450364626	-0.343890450364626	1.35272398592051	-0.343890450364626	-0.343825002266205	-0.343890450364626	-0.343489294066027	3.15313834014335	0.701049066282003	-0.343666200427566	-0.34304680112888	-0.343890450364626	-0.343890450364626	-0.343890450364626	-0.343890450364626	-0.342597300290741	-0.343800494329683	-0.343261047852308	-0.343780478177261	-0.343890450364626	0.378464261445174	-0.34341059349472	-0.343682618172869	-0.343115444553096	-0.343278384292872	-0.343890450364626	4.03574306082438
4eb53a520f214f1caa432f16967223c8	-0.576267441465202	2.88186838273163	-0.576504149815915	-0.575986833423897	-0.576048187064944	-0.576504149815915	0.837582979096247	-0.576504149815915	2.57297725433335	0.982818161687217	-0.576463603307113	-0.576504149815915	-0.57625521416071	1.54027535000423	0.878786312191187	-0.576365783664938	-0.575982662869656	-0.576504149815915	-0.576504149815915	0.681191570260496	1.92417454573949	-0.575703483269791	-0.57644869445796	-0.576115332605405	-0.57643634390232	-0.576504149815915	0.482718673954525	-0.576207896241318	-0.576375965901154	0.472927511833832	-0.576125951154566	-0.576504149815915	-0.576504149815915
1e238cf69a93a1a2daa7c27cf7f252f1	-0.271252293285846	-0.271393933940339	1.8376439559837	-0.270992784592268	1.3447799638023	-0.271471445776646	-0.271471445776646	4.96029266704048	-0.271087994664317	-0.271471445776646	-0.271433893976372	-0.271471445776646	-0.27124098772783	-0.271471445776646	-0.271471445776646	-0.271471445776646	-0.271471445776646	-0.271471445776646	-0.271471445776646	-0.271471445776646	-0.271471445776646	-0.271471445776646	-0.271471445776646	-0.271471445776646	-0.271471445776646	-0.271471445776646	-0.271471445776646	-0.271471445776646	-0.271471445776646	-0.271471445776646	-0.271471445776646	-0.271471445776646	-0.271471445776646
12470c486f558c083c46b45408cae9c6	0.0530279719464346	1.18647713048514	1.03596396045372	0.427774532334424	1.31567707767475	2.34782178231605	0.288582428914833	-0.529095034968192	1.86521392442918	-0.404815030106527	-1.22855153759199	-0.244961899499364	1.24342066169548	1.80668679847276	-1.22862659292717	-0.743894739346352	0.00751200725171885	-1.22862659292717	-1.22862659292717	-0.582396230960449	-0.039289014446933	-1.22712642623746	-1.22852294718852	-0.487315920666837	0.365578564309984	-0.634780924051239	-0.219374417844236	-0.0178323977221253	-1.22838695275644	0.715953651326531	0.432420650775465	-0.470221992489416	-0.119665897728875
943604f71971b419a2367b530186303f	4.13368610893645	-0.803753372512665	0.820707375006399	-0.00407972167672817	0.696968151716251	0.799429767360818	-0.0857740826565661	1.5510156575469	1.43655663235319	-0.803823061831308	-0.481401602127945	-0.803823061831308	-0.275795250003718	-0.803823061831308	0.56083202447586	-0.116289589304162	0.0577688192725229	-0.259207263562353	-0.456955137882148	-0.803823061831308	-0.211373841943969	-0.803146502381023	-0.803776374136157	0.0810856545631315	-0.383308086443155	-0.803823061831308	0.31511508961955	0.172811428534339	-0.803715100833937	-0.803418348519481	0.536094295514305	-0.0471383599278634	-0.803823061831308
c6f5c4d8343f60687af5d72396766263	-0.301637114597733	-0.301688432224977	0.985223574426582	-0.301542925964626	-0.301563535979126	-0.301716494837668	-0.301716494837668	0.0981883947414119	-0.30157749445506	-0.301716494837668	0.152258603874521	5.30828784944777	0.759743477809857	-0.301716494837668	-0.301716494837668	-0.301671253301767	-0.301546319984162	-0.301716494837668	-0.301716494837668	-0.301716494837668	0.175267100259149	-0.0321285778624446	-0.301698345095966	-0.30158952924069	-0.149507345472949	-0.301716494837668	-0.301716494837668	-0.301619690794241	-0.301674563956688	-0.30156017543558	-0.301593029130974	-0.0574892238479556	-0.301716494837668
99ee92e36a3bfda54437f2370facd8c8	-0.73811561395144	1.2713160782526	-0.738406873160039	1.29552414943058	1.845640617283	1.73099560052544	1.06006176275244	-0.738406873160039	-0.737897081796092	-0.738406873160039	-0.73835697920568	1.15587279976321	2.23852318547107	-0.738406873160039	-0.738406873160039	0.282348722145041	1.63390575176425	-0.738406873160039	-0.738406873160039	-0.738406873160039	-0.738406873160039	0.161749386308518	-0.0478051314618217	0.247198791118414	-0.73832259165656	-0.738406873160039	-0.738406873160039	-0.738038392465799	-0.738247517733742	1.27339535137366	-0.737936266298152	-0.120930143698467	-0.738406873160039
e127450ed2ad1088a651c6a3f8a405b3	1.19830574725382	1.22235481487363	-0.715054626027303	-0.714526531144691	-0.714589122128832	1.92408384855198	-0.715054626027303	2.64437826328689	-0.714631614147506	0.311062721744729	0.743758021462885	-0.715054626027303	-0.714800442128626	-0.715054626027303	-0.715054626027303	-0.714910810452447	-0.714511797343406	1.21564977258029	0.618494914885679	-0.715054626027303	1.77148224804585	-0.714220051548884	0.432717483877598	-0.714650099043258	-0.714984191164112	1.05938615953023	-0.715054626027303	1.09228155957312	-0.714921438098185	0.0629432445090811	-0.714661068730094	-0.715054626027303	-0.715054626027303
ce72009c0c36b5ff547b9a0c89f669ce	-0.189891479993759	-0.189928543734638	0.341289907340664	-0.189823456192598	-0.189838340236503	-0.189948812121844	-0.189948812121844	5.54663933485124	-0.189848421609545	-0.189948812121844	-0.189938994077239	-0.189948812121844	-0.189888515423352	-0.189948812121844	-0.189948812121844	-0.189948812121844	-0.189948812121844	-0.189948812121844	-0.189948812121844	-0.189948812121844	-0.189948812121844	-0.189948812121844	-0.189948812121844	-0.189948812121844	-0.189948812121844	-0.189948812121844	-0.189948812121844	-0.189948812121844	-0.189948812121844	-0.189948812121844	-0.189948812121844	-0.189948812121844	-0.189948812121844
6a8118b17d1d40cf877db24449ceb616	-0.556111339081798	-0.55629495859148	-0.556395429173384	1.43219846475535	-0.555848342224315	3.58513719180306	-0.556395429173384	1.4956680984862	-0.555898283488126	1.38947316307085	1.6283512506805	-0.556395429173384	-0.556096676894779	-0.556395429173384	0.282079239831344	-0.556230485556055	-0.555774406768804	-0.556395429173384	-0.556395429173384	-0.556395429173384	0.390267024613011	-0.555442833338346	-0.556329288958613	-0.555932239972655	-0.556314566256751	1.29975085138993	0.190979276616576	-0.556042387512436	-0.556242588559336	-0.555824775567554	-0.555944950816964	1.09758699572826	-0.556395429173384
2b33752353804e5616919765189fded9	-0.415571207849257	-0.415700483258528	-0.415771286487925	-0.415334822483943	0.703443228871765	-0.16983225737288	3.25471697370976	-0.415771286487925	-0.415421515346119	-0.415771286487925	-0.415736979596321	-0.415771286487925	-0.415560914121188	-0.415771286487925	-0.415771286487925	2.81015403918354	-0.41531385930352	-0.415771286487925	0.024049860671129	-0.415771286487925	-0.415771286487925	-0.0655215674174747	-0.415722768062742	-0.415430430554715	-0.284850258114041	-0.415771286487925	-0.415771286487925	0.878430178389771	-0.415659086118154	-0.415350546217216	2.82523913933316	-0.415771286487925	-0.415771286487925
5d7e1a2b35c473c81f0df40903f56f7b	-0.673763760142293	-0.673901781706746	0.761767147435084	2.55170104608534	2.45780422278023	-0.673977284131783	-0.673977284131783	-0.673977284131783	-0.673603528699961	-0.673977284131783	-0.673940708390321	1.14077175121416	1.39191440494739	-0.673977284131783	-0.673977284131783	0.624648335345543	-0.673497434103881	-0.673977284131783	-0.673977284131783	-0.673977284131783	-0.673977284131783	0.643533304282918	-0.67392638930775	1.12985739853386	0.240671507756005	-0.673977284131783	1.0702219939924	-0.673705006724904	0.558075916460653	-0.67353591531058	-0.673629406291274	-0.673977284131783	1.58026431142553
e5d55481f7455ae8a4620451dc7ac39a	3.76151271957627	2.92962268633624	-0.608779592974092	-0.608423601284847	-0.608465846186671	-0.608779592974092	-0.608779592974092	-0.608779592974092	0.142052672997348	1.26452040900484	-0.608751701225481	-0.608779592974092	-0.608608324265235	-0.608779592974092	0.737608782595958	0.0200314818480053	-0.608414659699047	-0.608779592974092	0.349118552863375	-0.273129525833885	0.518915685413053	0.449033576156486	-0.608740885126937	-0.150781837966214	-0.260808507590629	-0.608779592974092	0.316843154096294	-0.608572518063666	-0.16038036592257	-0.407634100064743	0.253981403956372	-0.608779592974092	0.24848708515251
4feb426703234389503a7b994773d50c	NA	NA	NA	NA	NA	NA	NA	NA	NA	NA	NA	NA	NA	NA	NA	NA	NA	NA	NA	NA	NA	NA	NA	NA	NA	NA	NA	NA	NA	NA	NA	NA	NA
22907d450b79c927e4ffe34a2d09d2aa	-0.676593997617806	-0.676733261082819	-0.676809619058468	-0.676340023922657	-0.676395251092745	-0.676809619058468	-0.676809619058468	-0.676809619058468	-0.676433119032454	-0.676809619058468	-0.127462884307712	0.552142219702086	-0.676582944540938	0.620428166920256	-0.676809619058468	0.351079740918889	0.931191909980723	-0.676809619058468	0.813462510447074	-0.676809619058468	-0.676809619058468	2.8379715930804	1.14284701279755	-0.676433964914947	-0.676744267749517	-0.676809619058468	-0.128639431947315	1.41895048583008	0.722076576844578	0.149840643822526	2.93192600751594	-0.676809619058468	0.641348087991957
fab19e407fc7d0aa7929a7eae23d8b53	-0.755963769191879	-0.756110354705735	-0.756190571522232	0.370766955136774	-0.755753861821017	-0.756190571522232	-0.756190571522232	-0.0879499339810613	0.17347392548744	-0.756190571522232	0.616732993017809	-0.756190571522232	1.69414847684519	-0.756190571522232	1.07280378214546	0.378666045434764	-0.755676185901057	1.18648092295976	1.0366041143234	-0.0830816345078129	-0.756190571522232	2.36795359437059	-0.756136041887517	2.00481098959946	-0.756123884799337	1.96528670218273	-0.0903547995310441	-0.755898766393424	-0.756064457668426	-0.755717377639933	-0.755817682812749	1.00244482151547	-0.756190571522232
ddb4dac009841c724d01963915728bcf	-0.213807299950312	-0.214038594007886	-0.214165305598901	-0.213384637823947	-0.213476728544937	-0.214165305598901	-0.214165305598901	-0.214165305598901	-0.213539627312976	5.38692547024612	-0.214103905973307	1.24918155487124	-0.213788897130363	-0.214165305598901	-0.214165305598901	-0.214165305598901	-0.214165305598901	-0.214165305598901	-0.214165305598901	-0.214165305598901	-0.214165305598901	-0.214165305598901	-0.214165305598901	-0.214165305598901	-0.214165305598901	-0.214165305598901	-0.214165305598901	-0.214165305598901	-0.214165305598901	-0.214165305598901	-0.214165305598901	-0.214165305598901	-0.214165305598901
cbc6ec0ad878294861f06ed9fff333c0	-0.54102579200898	-0.541189574918112	-0.541279329658654	-0.540726725070574	1.04632261246015	-0.541279329658654	0.262043041622568	-0.541279329658654	-0.540836376217699	-0.541279329658654	-0.541235835399582	1.80536521158012	-0.541012772753826	-0.541279329658654	-0.541279329658654	-0.541124563763777	2.06659640949633	0.470025897903887	-0.541279329658654	-0.541279329658654	-0.541279329658654	3.19907848320483	1.23928509592082	1.65681106554853	1.2419365649559	-0.541279329658654	-0.541279329658654	-0.540947782993572	-0.541136006852917	-0.540741926085886	-0.54085574106571	-0.541279329658654	-0.541279329658654
[truncated: 528 more rows]

## Sheet: edgeRun-Female-Ctrl_vs_Treatmen
ASV	logFC	logCPM	PValue	FDR
f7428585b7cf8d65f206036a5852adab	-8.83385	11.2637	1.91e-09	1.42e-06
e3811dd729c742150d8c1c5f6e40c5a9	8.59334	11.2841	5.41e-07	0.000201247
e2bc41d7bb14564d77567a24bb117ee7	-9.05981	11.475	9e-07	0.000223172
0e6645acd71bc7e1dc285638b8c3b44b	-8.81433	11.2456	1.84e-06	0.00034141
b155d97b79acc3086ce118451afa0124	-7.54625	10.1143	2.77e-06	0.000412265
3c26b759c265509da510b6b648bae9c3	-8.86393	11.2915	6.19e-06	0.000767528
4feb426703234389503a7b994773d50c	7.77296	10.5375	8.27e-06	0.000878979
d04b16de2b3bfa84754a4eafcfaec69a	8.6083	11.2982	9.63e-06	0.000895367
[truncated: 3 more rows]

## Sheet: edgeRun-Male-Ctrl_vs_Treatment-
ASV	logFC	logCPM	PValue	FDR
[truncated: 41 more rows]

## Sheet: Male_DEGs_Zscore
ASV	MC1-PV10	MC1-PV11	MC1-PV7	MC1-PV8	MC1-PV9	MC2-PV18	MC2-PV19	MC2-PV20	MC2-PV21	MC2-PV22	MC3-PV29	MC3-PV30	MC3-PV31	MC3-PV32	MC3-PV33	MT1-PV1	MT1-PV2	MT1-PV3	MT1-PV4	MT1-PV5	MT1-PV6	MT2-PV12	MT2-PV13	MT2-PV14	MT2-PV15	MT2-PV16	MT2-PV17	MT3-PV23	MT3-PV24	MT3-PV25	MT3-PV26	MT3-PV27	MT3-PV28	logFC	logCPM	PValue	FDR	ASV2	Domain	Kingdom	Phylum	Class	Order	Family	Genus	Species	confidence	sequence
[truncated: 41 more rows]

[truncated: 1 more sheets: Female_DEGs_Zscore]
