# Supplementary material for: Degenerative Cervical Myelopathy induces sex-specific dysbiosis in mice
Source: Front Microbiol. 2023 Oct 20;14:1229783. doi: 10.3389/fmicb.2023.1229783 (PMC10623434; doi:10.3389/fmicb.2023.1229783)
Supplement: Supplementary file 4 [file Table_4.XLSX]

## Sheet: male_genomes_95%
ASV_ID	contig	Identity	e-value	all5010_genomes blastn match (>95%)	anvio_taxonomy_GTDB
f5bf7ef226b458f24103a3531394ec7d	gnl|BL_ORD_ID|2404403NODE_138_length_15169_cov_13.505822	98.0237	2.57622e-115	extra-SRR6945409.1	Alistipes
096aa868afaffdd4bd938b9faa623a2a	gnl|BL_ORD_ID|1599525NODE_55_length_118653_cov_47.322231	100	1.18176e-128	extra-SRR5925331.29	UBA11940_sp013316055
179beb90602a37152b5bd7e022db905b	gnl|BL_ORD_ID|3921472NODE_17_length_182132_cov_8.856204	96.4427	1.20711e-113	single-China_4-2_110307.21	UBA3282
17e3b0c68a0c50a547dd9db57d609a89	gnl|BL_ORD_ID|4041218NODE_210_length_69569_cov_19.023909	95.6522	2.61293e-110	single-China_5-7_110307.37	Clostridia
1ec2a6a0674989729626ddfb269858eb
1ece08fa5a366f1361e7ea04639f1c4f
20ffb1eb28a74810e0c5fd95825aacb5
25f537c4856de1617e682de90caba215	gnl|BL_ORD_ID|3921472NODE_17_length_182132_cov_8.856204	95.2569	1.21568e-108	single-China_4-2_110307.21	UBA3282
2616210b023c8ff2ff5ac0c1ae00b1bc
2ce88e05f1919882b01289628bd3d156	gnl|BL_ORD_ID|4119408NODE_72_length_109081_cov_11.705419	95.2569	1.21568e-108	single-China_7-6_110307.3	COE1_sp009774375
3ccdc88a8737c3ac98bd0a40b1b93bf8	gnl|BL_ORD_ID|2404403NODE_138_length_15169_cov_13.505822	96.4427	1.20711e-113	extra-SRR6945409.1	Alistipes
405600e715167b5f59ca7a6438a970e2
4ae33466f29277f3cba0834c894ee4a4	gnl|BL_ORD_ID|4119408NODE_72_length_109081_cov_11.705419	98.419	5.53723e-122	single-China_7-6_110307.3	COE1_sp009774375
4ed1b5cf2300afb72f7fb97ec6ff2e9e	gnl|BL_ORD_ID|4762192NODE_4_length_244402_cov_28.435774	99.6047	5.4982e-127	single-MIKI_Tac809-Taconic_mp.2	COE1_sp002358575
57d7db0d1473a71e4955463f11cbbfb7
5a483930ae687501d239547148452dec	gnl|BL_ORD_ID|4281250NODE_710_length_39051_cov_11.411017	97.6285	1.1986e-118	single-China_Group2-4A_111219.55	CAG-56_sp004793585-REP1
5eaeab6fa2a8efe96eac7a0712c65080	gnl|BL_ORD_ID|888239NODE_117_length_75849_cov_16.677626	96.8379	2.59451e-115	extra-ERR982838.13	Kineothrix sp000403275
6397b20a49248172fe4f03c91a114738	gnl|BL_ORD_ID|3961506NODE_71_length_94488_cov_102.910804	96.8254	9.2893e-115	single-China_46_110531.8	UBA7173_sp001915385
6499f775759ee97ec90a0572cd043472	gnl|BL_ORD_ID|4101285NODE_1517_length_11719_cov_5.776406	99.2126	7.14455e-126	single-China_7-3_110307.39	RACS-045_sp013316135
693c980645f0af912893409ceee83c7e	gnl|BL_ORD_ID|4041218NODE_210_length_69569_cov_19.023909	95.6522	2.61293e-110	single-China_5-7_110307.37	Clostridia
6ad914e7f81c311b1d7c7921bb90c92e
721bbde09abf2f51fc7d8caeab5b22f1
7edcf5ecdce390629d592a7f513444a8
7f86fe47ae4b09efb9edc6826f727868	gnl|BL_ORD_ID|4041218NODE_210_length_69569_cov_19.023909	95.6522	2.61293e-110	single-China_5-7_110307.37	Clostridia
84977ba94188c5d008f9861e3e14d0a5
85781f76fdd51f1cea0eab36c8b76a12
91c6bd1773aaec302882b43aff6babc4
9b5811da3588dc72c1fce3ea07d51eac	gnl|BL_ORD_ID|2322284NODE_80_length_31387_cov_12.582504	100	4.23113e-128	extra-SRR6945391.1	Paramuribaculum_sp001689565
a6b8bcc8499b4128678a3a671a0bd004	gnl|BL_ORD_ID|1866846NODE_11894_length_3800_cov_5.760481	95.2756	1.21568e-108	extra-SRR5927704.18	UMGS1994_sp900553945
a80466eb93811bc792e1524c6afc316a	gnl|BL_ORD_ID|902683NODE_581_length_31486_cov_13.260889	95.6693	2.61293e-110	extra-ERR982839.8	Acetatifactor sp011959105
a900b6678ce86851fb16bfafb87f3326
b0393e75df8338f8224463cb1b34efbd
bf5f9d8270688749d52cb3dfea76b096
c67805e12dc927c5b3ba6b192381ecf7	gnl|BL_ORD_ID|902683NODE_581_length_31486_cov_13.260889	96.0474	5.61613e-112	extra-ERR982839.8	CAG-56_sp004793585-REP1
cb8b8a6ee6bcfa115f8b24a45fa1c12a	gnl|BL_ORD_ID|4107862NODE_310_length_54295_cov_58.594506	96.0317	2.01078e-111	single-China_7-4_110307_52	Muribaculaceae
cd6dbb569337fc7ba0542287c426baa1	gnl|BL_ORD_ID|4339219NODE_257_length_45032_cov_23.345554	96.8379	9.33153e-115	single-China_MH-0-5_111223.1	Dubosiella_sp004793885
d4b8175c2cc6c6722d5d45082d4fd64d	gnl|BL_ORD_ID|4119408NODE_72_length_109081_cov_11.705419	96.4427	1.20711e-113	single-China_7-6_110307.3	COE1_sp009774375
e438498696e4ce6da6b786e98f911a9e	gnl|BL_ORD_ID|4751076NODE_3435_length_9932_cov_32.534575	99.6047	5.4982e-127	single-MIKI_Tac809-8_tac1x6.65	CAG-56_sp004793585-REP1
f23d98130c516c32690c5f724acf5d83
f4ad92074fc1b41b8ada1a77cc50d272
fe9a3e2c5c45bec637506a2ae1eb243c	gnl|BL_ORD_ID|4687813NODE_193_length_84652_cov_4.957599	100	1.18176e-128	single-MIKI_NCI-3_1090_in7.61	UMGS1004_sp003343805

## Sheet: female_genomes_95%
ASV_ID	contig	Identity	e-value	all5010_genomes blastn match (>95%)	anvio_taxonomy_GTDB
d4b8175c2cc6c6722d5d45082d4fd64d	gnl|BL_ORD_ID|4119408NODE_72_length_109081_cov_11.705419	96.4427	1.20711e-113	single-China_7-6_110307.3	COE1 sp009774375
e2bc41d7bb14564d77567a24bb117ee7
3c26b759c265509da510b6b648bae9c3	gnl|BL_ORD_ID|1075255NODE_276_length_40916_cov_14.582707	96.8254	9.2893e-115	extra-SRR2174317.25	UBA7173 sp002491305
0e6645acd71bc7e1dc285638b8c3b44b	gnl|BL_ORD_ID|4041218NODE_210_length_69569_cov_19.023909	96.8379	2.59451e-115	single-China_5-7_110307.37	Clostridia
b358d76cf51dad99d526470074e5f31c	gnl|BL_ORD_ID|4762192NODE_4_length_244402_cov_28.435774	96.0474	5.61613e-112	single-MIKI_Tac809-Taconic_mp.2	COE1 sp002358575
b155d97b79acc3086ce118451afa0124
2b33752353804e5616919765189fded9
4feb426703234389503a7b994773d50c	gnl|BL_ORD_ID|2210458NODE_280_length_25512_cov_12.716345	100	1.18176e-128	extra-SRR6032596.27	Alistipes sp009774895
e3811dd729c742150d8c1c5f6e40c5a9	gnl|BL_ORD_ID|2747086NODE_4985_length_5435_cov_30.209851	95.6522	2.61293e-110	extra-SRR7691174.24	Lawsonibacter
d04b16de2b3bfa84754a4eafcfaec69a	gnl|BL_ORD_ID|4736193NODE_356_length_50923_cov_30.539553	95.6693	9.35526e-110	single-MIKI_Tac401_52_Tac401mp.6	UBA7173 sp001689485

## Sheet: anvio_bins_summary_male
bins	total_length	num_contigs	N50	GC_content	percent_completion	percent_redundancy	t_domain	t_phylum	t_class	t_order	t_family	t_genus	t_species
Acetatifactor_sp011959105	3500879	59	82334	51.9846	98.5915	1.40845	Bacteria	Firmicutes	Clostridia	Lachnospirales	Lachnospiraceae	Acetatifactor	Acetatifactor sp011959105
Alistipes	2001590	158	24036	54.5275	53.5211	4.22535	Bacteria	Bacteroidota	Bacteroidia	Bacteroidales	Rikenellaceae	Alistipes
CAG_56_sp004793585_REP1	3603069	226	38792	46.3029	97.1831	0	Bacteria	Firmicutes	Clostridia	Lachnospirales	Lachnospiraceae	CAG-56	CAG-56 sp004793585
CAG_56_sp004793585_REP2	1079255	120	22361	42.0543	0	0	Bacteria	Firmicutes	Clostridia	Lachnospirales	Lachnospiraceae	CAG-56	CAG-56 sp004793585
COE1_sp002358575	4655513	74	162894	40.1762	100	1.40845	Bacteria	Firmicutes	Clostridia	Lachnospirales	Lachnospiraceae	COE1	COE1 sp002358575
COE1_sp009774375	4645824	66	110650	50.0375	95.7746	1.40845	Bacteria	Firmicutes	Clostridia	Lachnospirales	Lachnospiraceae	COE1	COE1 sp009774375
Clostridia	3353472	36	169337	45.1887	94.3662	1.40845	Bacteria	Firmicutes	Clostridia
Dubosiella_sp004793885	1379930	122	18806	50.6785	28.169	0	Bacteria	Firmicutes	Bacilli	Erysipelotrichales	Erysipelotrichaceae	Dubosiella	Dubosiella sp004793885
Kineothrix_sp000403275	3033543	115	37974	45.4764	71.831	1.40845	Bacteria	Firmicutes	Clostridia	Lachnospirales	Lachnospiraceae	Kineothrix	Kineothrix sp000403275
Muribaculaceae	2580012	46	93827	55.3821	98.5915	1.40845	Bacteria	Bacteroidota	Bacteroidia	Bacteroidales	Muribaculaceae
Paramuribaculum_sp001689565	2208381	173	21231	49.2215	94.3662	5.6338	Bacteria	Bacteroidota	Bacteroidia	Bacteroidales	Muribaculaceae	Paramuribaculum	Paramuribaculum sp001689565
RACS_045_sp013316135	1744021	138	19628	43.2398	92.9577	1.40845	Bacteria	Firmicutes	Clostridia	Christensenellales	UBA3700	RACS-045	RACS-045 sp013316135
UBA11940_sp013316055	1136787	6	746850	43.8205	29.5775	0	Bacteria	Firmicutes	Clostridia	Christensenellales	Borkfalkiaceae	UBA11940	UBA11940 sp013316055
UBA3282	3596195	78	63663	47.2999	83.0986	0	Bacteria	Firmicutes	Clostridia	Lachnospirales	Lachnospiraceae	UBA3282
UBA7173_sp001915385	2769483	133	34769	51.577	92.9577	1.40845	Bacteria	Bacteroidota	Bacteroidia	Bacteroidales	Muribaculaceae	UBA7173	UBA7173 sp001915385
UMGS1004_sp003343805	1788304	166	14726	49.0419	92.9577	4.22535	Bacteria	Firmicutes	Clostridia	Christensenellales	Borkfalkiaceae	UMGS1004	UMGS1004 sp003343805
UMGS1994_sp900553945	1594030	371	5544	28.0927	71.831	4.22535	Bacteria	Firmicutes	Clostridia	TANB77	CAG-508	UMGS1994	UMGS1994 sp900553945
			37974		92.9577

## Sheet: anvio_bins_summary_female
bins	total_length	num_contigs	N50	GC_content	percent_completion	percent_redundancy	t_domain	t_phylum	t_class	t_order	t_family	t_genus	t_species
Alistipes_sp009774895	1709772	69	42974	63.7887	91.5493	0	Bacteria	Bacteroidota	Bacteroidia	Bacteroidales	Rikenellaceae	Alistipes	Alistipes sp009774895
COE1_sp002358575	4881465	66	162894	40.155	100	1.40845	Bacteria	Firmicutes	Clostridia	Lachnospirales	Lachnospiraceae	COE1	COE1 sp002358575
COE1_sp009774375	4616318	65	110650	50.0456	95.7746	1.40845	Bacteria	Firmicutes	Clostridia	Lachnospirales	Lachnospiraceae	COE1	COE1 sp009774375
Clostridia	3537511	42	120548	45.3487	94.3662	1.40845	Bacteria	Firmicutes	Clostridia
Lawsonibacter	2519261	153	32238	60.416	73.2394	0	Bacteria	Firmicutes	Clostridia	Oscillospirales	Oscillospiraceae	Lawsonibacter
UBA7173_sp001689485	2694817	35	107100	50.3819	94.3662	1.40845	Bacteria	Bacteroidota	Bacteroidia	Bacteroidales	Muribaculaceae	UBA7173	UBA7173 sp001689485
UBA7173_sp002491305	2373298	108	36212	55.7938	95.7746	1.40845	Bacteria	Bacteroidota	Bacteroidia	Bacteroidales	Muribaculaceae	UBA7173	UBA7173 sp002491305
			107100		94.3662
