# Supplementary material for: Degenerative Cervical Myelopathy induces sex-specific dysbiosis in mice
Source: Front Microbiol. 2023 Oct 20;14:1229783. doi: 10.3389/fmicb.2023.1229783 (PMC10623434; doi:10.3389/fmicb.2023.1229783)
Supplement: Supplementary file 5 [file Table_5.XLSX]

## Sheet: male
8 elements included exclusively in "Control":	4 common elements in "Control" and "Treatment":	4 elements included exclusively in "Treatment":
UBA7173_sp001915385	Alistipes	Muribaculaceae
COE1_sp002358575	Clostridia	UBA11940_sp013316055
Dubosiella_sp004793885	COE1_sp009774375	Kineothrix_sp000403275
UBA3282	CAG_56_sp004793585_REP1	Paramuribaculum_sp001689565
UMGS1994_sp900553945
UMGS1004_sp003343805
RACS_045_sp013316135
Acetatifactor_sp011959105

## Sheet: female
4 elements included exclusively in "Control":	3 elements included exclusively in "Treatment":
COE1 sp009774375	Alistipes sp009774895
UBA7173 sp002491305	Lawsonibacter
Clostridia	UBA7173 sp001689485
COE1 sp002358575

## Sheet: gene_presence_absence_female
Gene	Non-unique Gene name	Annotation	No. isolates	No. sequences	Avg sequences per isolate	Genome Fragment	Order within Fragment	Accessory Fragment	Accessory Order with Fragment	QC	Min group size nuc	Max group size nuc	Avg group size nuc	Alistipes_sp009774895	COE1_sp002358575	COE1_sp009774375	Clostridia	Lawsonibacter	UBA7173_sp001689485	UBA7173_sp002491305
COG0636		FoF1-type ATP synthase	3	3	1	386	1209	386	636		251	254	253		female_bins_95_identity___16188	female_bins_95_identity___5968	female_bins_95_identity___5031
group_20			3	3	1	386	3274	386	1584		77	107	95		female_bins_95_identity___17766	female_bins_95_identity___14212	female_bins_95_identity___13500
COG0051		Ribosomal protein S10 (RpsJ) (PDB:4V4H)	3	3	1	386	4682	386	4065		317	317	317		female_bins_95_identity___5298	female_bins_95_identity___14728	female_bins_95_identity___17631
COG0093		Ribosomal protein L14 (RplN) (PDB:4V4H)	3	3	1	386	4696	386	4079		368	368	368		female_bins_95_identity___5310	female_bins_95_identity___14739	female_bins_95_identity___17642
COG0199		Ribosomal protein S14 (RpsN) (PDB:4V4H)	3	3	1	386	4706	386	4086		185	185	185		female_bins_95_identity___5313	female_bins_95_identity___14742	female_bins_95_identity___17645
COG0361		Translation initiation factor IF-1 (InfA) (PDB:5FIM)	3	3	1	386	4720	386	4107		218	218	218		female_bins_95_identity___5324	female_bins_95_identity___14753	female_bins_95_identity___17656
COG1882		Pyruvate-formate lyase (PflD) (PDB:1CM5)	2	2	1	387	528	387	442		245	245	245		female_bins_95_identity___4297	female_bins_95_identity___9787
COG0183		Acetyl-CoA acetyltransferase (PaaJ) (PDB:1AFW)	2	2	1	386	2006	386	815		1184	1184	1184		female_bins_95_identity___6100	female_bins_95_identity___18699
COG1024		Enoyl-CoA hydratase/carnithine racemase (CaiD) (PDB:1DCI)	2	2	1	386	2007	386	816		785	785	785		female_bins_95_identity___6101	female_bins_95_identity___18698
COG2086		Electron transfer flavoprotein	2	2	1	386	2010	386	819		782	782	782		female_bins_95_identity___6104	female_bins_95_identity___18695
COG2025		Electron transfer flavoprotein	2	2	1	386	2011	386	849		1043	1043	1043		female_bins_95_identity___6105	female_bins_95_identity___18694
COG4877		Uncharacterized conserved protein	2	2	1	386	556	386	984		200	200	200		female_bins_95_identity___6112	female_bins_95_identity___8699
COG0393		Uncharacterized pentameric protein YbjQ	2	2	1	386	548	386	982		311	311	311		female_bins_95_identity___6114	female_bins_95_identity___8701
COG3835		Sugar diacid utilization regulator CdaR (CdaR)	2	2	1	386	527	386	961		1088	1088	1088		female_bins_95_identity___6131	female_bins_95_identity___864
COG1396		Transcriptional regulator	2	2	1	28	8	28	8		314	548	431		female_bins_95_identity___6177		female_bins_95_identity___14146
COG0548		N-acetylglutamate kinase (ArgB) (PDB:3S6G)	2	2	1	386	4987	386	4020		902	905	903		female_bins_95_identity___6882	female_bins_95_identity___14691
COG1725		DNA-binding transcriptional regulator YhcF	2	2	1	386	5078	386	3751		371	398	384		female_bins_95_identity___6941	female_bins_95_identity___7421
COG1472		Periplasmic beta-glucosidase and related glycosidases (BglX) (PDB:2X40)	2	2	1	386	2021	386	824		1772	1772	1772		female_bins_95_identity___7562	female_bins_95_identity___18684
COG1312		D-mannonate dehydratase (UxuA) (PDB:1TZ9)	2	2	1	386	2022	386	823		1070	1070	1070		female_bins_95_identity___7563	female_bins_95_identity___18683
COG1028		NAD(P)-dependent dehydrogenase	2	2	1	386	2030	386	5943		845	845	845		female_bins_95_identity___7564	female_bins_95_identity___18682
group_119	COG0267	Ribosomal protein L33 (RpmG) (PDB:1VS6)	2	2	1	386	2131	386	6224		149	149	149		female_bins_95_identity___7612	female_bins_95_identity___8629
COG0081		Ribosomal protein L1 (RplA) (PDB:3J65)	2	2	1	386	2138	386	5929		689	689	689		female_bins_95_identity___7616	female_bins_95_identity___8633
COG0085		DNA-directed RNA polymerase	2	2	1	386	1361	386	5925		3860	3863	3861		female_bins_95_identity___7620	female_bins_95_identity___12354
COG0086		DNA-directed RNA polymerase	2	2	1	386	1360	386	1092		3662	3719	3690		female_bins_95_identity___7621	female_bins_95_identity___12355
COG0465		ATP-dependent Zn proteases (HflB) (PDB:1LV7)	2	2	1	386	1453	386	78		1802	1802	1802		female_bins_95_identity___8237	female_bins_95_identity___7969
COG1188		Ribosomal 50S subunit-recycling heat shock protein	2	2	1	386	1460	386	85		239	239	239		female_bins_95_identity___8244	female_bins_95_identity___7976
COG0776		Bacterial nucleoid DNA-binding protein IHF-alpha (HimA) (PDB:1B8Z)	2	2	1	386	1478	386	6540		275	275	275		female_bins_95_identity___8245	female_bins_95_identity___7977
COG3459		Cellobiose phosphorylase (PDB:1V7V) (PUBMED:17307853)	2	2	1	386	4884	386	4274		308	2435	1371		female_bins_95_identity___9329	female_bins_95_identity___242
COG0297		Glycogen synthase (GlgA) (PDB:1RZU)	2	2	1	386	5108	386	4285		1385	1448	1416		female_bins_95_identity___9340	female_bins_95_identity___7390
COG0458		Carbamoylphosphate synthase large subunit (CarB) (PDB:1C30)	2	2	1	386	5099	386	3772		3197	3197	3197		female_bins_95_identity___9349	female_bins_95_identity___7400
COG1328		Anaerobic ribonucleoside-triphosphate reductase (NrdD) (PDB:4COI)	2	2	1	395	71	395	60		2165	2165	2165		female_bins_95_identity___10507	female_bins_95_identity___11476
group_140	COG1028	NAD(P)-dependent dehydrogenase	2	2	1	393	40	393	23		803	803	803		female_bins_95_identity___11539	female_bins_95_identity___7456
COG0800		2-keto-3-deoxy-6-phosphogluconate aldolase (Eda) (PDB:2V81)	2	2	1	393	70	393	58		962	962	962		female_bins_95_identity___11540	female_bins_95_identity___7457
COG1278		Cold shock protein	2	2	1	394	78	394	32		212	212	212		female_bins_95_identity___11984	female_bins_95_identity___3768
COG5811		Sporulation sigma factor SigE (mother cell-specific	2	2	1	394	54	394	79		728	728	728		female_bins_95_identity___12008	female_bins_95_identity___3793
COG5813		Sporulation sigma factor SigG (forespore-specific	2	2	1	394	53	394	80		782	782	782		female_bins_95_identity___12009	female_bins_95_identity___3794
group_145			2	2	1	394	46	394	23		146	149	147		female_bins_95_identity___12016	female_bins_95_identity___3801
group_146	COG1028	NAD(P)-dependent dehydrogenase	2	2	1	392	108	392	90		800	800	800		female_bins_95_identity___12847	female_bins_95_identity___17240
COG3958		Transketolase	2	2	1	391	72	391	76		959	959	959		female_bins_95_identity___13295	female_bins_95_identity___12381
COG3959		Transketolase	2	2	1	391	73	391	78		833	833	833		female_bins_95_identity___13296	female_bins_95_identity___12380
COG0235		5-methylthioribulose/5-deoxyribulose/Fuculose 1-phosphate aldolase (methionine salvage	2	2	1	391	74	391	79		695	695	695		female_bins_95_identity___13297	female_bins_95_identity___12378
COG0442		Prolyl-tRNA synthetase (ProS) (PDB:5XIF)	2	2	1	391	77	391	82		1439	1439	1439		female_bins_95_identity___13300	female_bins_95_identity___15139
COG0050		Translation elongation factor EF-Tu	2	2	1	386	1356	386	1088		1187	1187	1187		female_bins_95_identity___13650	female_bins_95_identity___12359
COG0480		Translation elongation factor EF-G	2	2	1	386	1357	386	1089		2117	2117	2117		female_bins_95_identity___13651	female_bins_95_identity___12358
COG0049		Ribosomal protein S7 (RpsG) (PDB:4V4H)	2	2	1	386	1358	386	1090		470	470	470		female_bins_95_identity___13652	female_bins_95_identity___12357
COG0149		Triosephosphate isomerase (TpiA) (PDB:1HG3)	2	2	1	386	3319	386	1631		749	830	789		female_bins_95_identity___13992	female_bins_95_identity___1397
COG0126		3-phosphoglycerate kinase (Pgk) (PDB:13PK)	2	2	1	386	3320	386	1632		1223	1223	1223		female_bins_95_identity___13993	female_bins_95_identity___1399
COG0238		Ribosomal protein S18 (RpsR) (PDB:4V4H)	2	2	1	8	46	8	87		269	269	269						female_bins_95_identity___390	female_bins_95_identity___15224
COG4974		Site-specific recombinase XerD (XerD) (PDB:1A0P)	2	2	1	386	3334	386	1643		884	884	884		female_bins_95_identity___13999	female_bins_95_identity___1409
COG1094		rRNA processing protein Krr1/Pno1	2	2	1	386	3342	386	1646		1541	1544	1542		female_bins_95_identity___14002	female_bins_95_identity___1412
COG2052		Regulator of extracellular matrix RemA	2	2	1	386	3371	386	1675		269	275	272		female_bins_95_identity___14008	female_bins_95_identity___1426
group_166	COG0395	ABC-type glycerol-3-phosphate transport system	2	2	1	386	3384	386	1694		881	881	881		female_bins_95_identity___14021	female_bins_95_identity___14236
COG0516		IMP dehydrogenase/GMP reductase (GuaB) (PDB:1B3O)	2	2	1	386	5146	386	4353		1454	1454	1454		female_bins_95_identity___14338	female_bins_95_identity___7362
COG0268		Ribosomal protein S20 (RpsT) (PDB:4V4H)	2	2	1	399	56	399	58		263	263	263		female_bins_95_identity___14821	female_bins_95_identity___8103
COG0048		Ribosomal protein S12 (RpsL) (PDB:4V4H)	2	2	1	11	127	11	132		389	389	389						female_bins_95_identity___6837	female_bins_95_identity___6229
group_17076	COG0051	Ribosomal protein S10 (RpsJ) (PDB:4V4H)	2	2	1	11	124	11	83		305	305	305						female_bins_95_identity___6840	female_bins_95_identity___6232
group_17084	COG0093	Ribosomal protein L14 (RplN) (PDB:4V4H)	2	2	1	11	113	11	71		365	365	365						female_bins_95_identity___6851	female_bins_95_identity___6243
COG0100		Ribosomal protein S11 (RpsK) (PDB:4V4H)	2	2	1	11	96	11	52		389	389	389						female_bins_95_identity___6866	female_bins_95_identity___10536
COG0356		FoF1-type ATP synthase	2	2	1	386	1045	386	635		716	716	716		female_bins_95_identity___16187	female_bins_95_identity___5969
COG0568		DNA-directed RNA polymerase	2	2	1	10	54	10	135		860	860	860						female_bins_95_identity___18783	female_bins_95_identity___5492
COG2310		Stress response protein SCP2 (TerZ) (PDB:2QNG)	2	2	1	386	1294	386	282		581	581	581		female_bins_95_identity___16247	female_bins_95_identity___12325
COG0334		Glutamate dehydrogenase/leucine dehydrogenase (GdhA) (PDB:1B3B) (PUBMED:24391520)	2	2	1	386	1940	386	6190		1334	1355	1344		female_bins_95_identity___16350	female_bins_95_identity___13567
COG1087		UDP-glucose 4-epimerase (GalE) (PDB:1A9Y)	2	2	1	386	794	386	6149		1016	1016	1016		female_bins_95_identity___16391	female_bins_95_identity___12264
group_180	COG0448	Glucose-1-phosphate adenylyltransferase (ADP-glucose pyrophosphorylase) (GlgC) (PDB:5MNI) (PUBMED:27545622)	2	2	1	386	800	386	6131		1118	1118	1118		female_bins_95_identity___16397	female_bins_95_identity___12270
COG2088		DNA-binding protein SpoVG	2	2	1	386	801	386	6130		281	281	281		female_bins_95_identity___16398	female_bins_95_identity___12271
COG5845		Stage V sporulation protein SpoVT	2	2	1	386	824	386	726		548	548	548		female_bins_95_identity___16411	female_bins_95_identity___12282
COG0448		Glucose-1-phosphate adenylyltransferase (ADP-glucose pyrophosphorylase) (GlgC) (PDB:5MNI) (PUBMED:27545622)	2	2	1	386	408	386	758		1205	1205	1205		female_bins_95_identity___16443	female_bins_95_identity___5924
COG5830		Stage III sporulation protein SpoIIID	2	2	1	386	2190	386	767		254	257	255		female_bins_95_identity___16451	female_bins_95_identity___5915
COG1653		ABC-type glycerol-3-phosphate transport system	2	2	1	386	2178	386	1015		977	1619	1298		female_bins_95_identity___16463	female_bins_95_identity___8673
COG1522		DNA-binding transcriptional regulator	2	2	1	396	33	396	45		482	482	482		female_bins_95_identity___16493	female_bins_95_identity___4564
COG4209		ABC-type polysaccharide transport system	2	2	1	386	2402	386	5576		83	938	510		female_bins_95_identity___16764	female_bins_95_identity___5803
COG0653		Preprotein translocase subunit SecA (ATPase	2	2	1	386	2460	386	5518		2567	2567	2567		female_bins_95_identity___16822	female_bins_95_identity___14267
COG1186		Protein chain release factor PrfB (PrfB) (PDB:1GQE)	2	2	1	386	3414	386	5517		983	995	989		female_bins_95_identity___16823	female_bins_95_identity___14266
COG1171		Threonine deaminase (IlvA) (PDB:3IAU)	2	2	1	386	6508	386	2823		1220	1220	1220		female_bins_95_identity___16855	female_bins_95_identity___11904
COG1302		Uncharacterized conserved protein YloU	2	2	1	386	247	386	1893		356	356	356		female_bins_95_identity___16889	female_bins_95_identity___6713
COG0280		Phosphotransacetylase (includes Pta	2	2	1	386	243	386	1880		983	1097	1040		female_bins_95_identity___16894	female_bins_95_identity___6709
COG0187		DNA gyrase/topoisomerase IV	2	2	1	386	240	386	1879		1928	1940	1934		female_bins_95_identity___16895	female_bins_95_identity___6708
COG0211		Ribosomal protein L27 (RpmA) (PDB:1VS6)	2	2	1	386	217	386	1849		287	287	287		female_bins_95_identity___16919	female_bins_95_identity___6685
group_195			2	2	1	386	5499	386	2917		1016	1016	1016		female_bins_95_identity___16968	female_bins_95_identity___19256
COG0136		Aspartate-semialdehyde dehydrogenase (Asd) (PDB:1BRM)	2	2	1	386	5504	386	4856		1085	1085	1085		female_bins_95_identity___16973	female_bins_95_identity___19264
group_197	COG0480	Translation elongation factor EF-G	2	2	1	386	5436	386	4838		2090	2090	2090		female_bins_95_identity___16991	female_bins_95_identity___12782
COG0372		Citrate synthase (GltA) (PDB:3TQG) (PUBMED:25211225)	2	2	1	386	3158	386	5299		1418	1421	1419		female_bins_95_identity___17283	female_bins_95_identity___15508
COG0195		Transcription antitermination factor NusA	2	2	1	386	3160	386	5304		1244	1283	1263		female_bins_95_identity___17285	female_bins_95_identity___15506
group_2	COG1882	Pyruvate-formate lyase (PflD) (PDB:1CM5)	2	2	1	386	2666	386	5210		239	239	239		female_bins_95_identity___17872	female_bins_95_identity___12728
COG0532		Translation initiation factor IF-2	2	2	1	386	3179	386	5307		2072	3122	2597		female_bins_95_identity___17288	female_bins_95_identity___19309
COG0184		Ribosomal protein S15P/S13E (RpsO) (PDB:4V4H)	2	2	1	386	3185	386	5313		266	266	266		female_bins_95_identity___17294	female_bins_95_identity___13876
COG1185		Polyribonucleotide nucleotidyltransferase (polynucleotide phosphorylase) (Pnp) (PDB:1E3P)	2	2	1	386	5604	386	5314		2126	2126	2126		female_bins_95_identity___17295	female_bins_95_identity___13875
COG0784		CheY-like REC (receiver) domain	2	2	1	386	5622	386	5332		896	896	896		female_bins_95_identity___17313	female_bins_95_identity___19292
COG2407		L-fucose isomerase or related protein (FucI) (PDB:1FUI) (PUBMED:22865846)	2	2	1	386	5742	386	5452		1484	1484	1484		female_bins_95_identity___17385	female_bins_95_identity___16701
COG2848		Uncharacterized conserved protein	2	2	1	386	5820	386	5488		1364	1364	1364		female_bins_95_identity___17421	female_bins_95_identity___11913
COG3426		Butyrate kinase (Buk) (PDB:1SAZ)	2	2	1	386	2013	386	847		1067	1067	1067		female_bins_95_identity___17485	female_bins_95_identity___18692
COG1932		Phosphoserine aminotransferase (SerC) (PDB:1BJN)	2	2	1	386	3201	386	1571		1082	1082	1082		female_bins_95_identity___17779	female_bins_95_identity___16109
COG0129		Dihydroxyacid dehydratase/phosphogluconate dehydratase (IlvD) (PDB:2GP4)	2	2	1	386	3197	386	1567		1670	1670	1670		female_bins_95_identity___17781	female_bins_95_identity___16106
group_209			2	2	1	386	3123	386	5115		341	341	341		female_bins_95_identity___17805		female_bins_95_identity___7944
COG5016		Pyruvate/oxaloacetate carboxyltransferase (OadA1) (PDB:2NX9) (PUBMED:18681940)	2	2	1	386	2769	386	2444		1436	1436	1436		female_bins_95_identity___415	female_bins_95_identity___15781
COG1961		Site-specific DNA recombinase SpoIVCA/DNA invertase PinE (SpoIVCA) (PDB:1GDT)	2	2	1	386	2915	386	5113		1508	1523	1515		female_bins_95_identity___17807		female_bins_95_identity___7946
COG1148		Heterodisulfide reductase	2	2	1	386	2888	386	5248		1496	1496	1496		female_bins_95_identity___17834	female_bins_95_identity___13893
COG0234		Co-chaperonin GroES (HSP10) (GroES)	2	2	1	386	2663	386	5174		284	284	284		female_bins_95_identity___17875	female_bins_95_identity___12731
COG0488		ATPase components of ABC transporters with duplicated ATPase domains (Uup) (PDB:5ZXD)	2	2	1	386	2660	386	5171		1646	1646	1646		female_bins_95_identity___17878	female_bins_95_identity___12734
COG0523		Zinc metallochaperone YeiR/ZagA and related GTPases	2	2	1	386	3557	386	5143		1043	1133	1088		female_bins_95_identity___17893	female_bins_95_identity___12748
group_215	COG0568	DNA-directed RNA polymerase	2	2	1	386	3564	386	2965		1115	1115	1115		female_bins_95_identity___17900	female_bins_95_identity___12755
COG2268		Uncharacterized membrane protein YqiK	2	2	1	386	5424	386	4833		1532	1538	1535		female_bins_95_identity___17919	female_bins_95_identity___12787
COG2242		Precorrin-6B methylase 2 (CobL) (PDB:1F38)	2	2	1	386	5412	386	4802		908	908	908		female_bins_95_identity___17931	female_bins_95_identity___2425
COG0691		tmRNA-binding protein (SmpB) (PDB:1J1H) (PUBMED:26251518)	2	2	1	386	5401	386	4791		470	470	470		female_bins_95_identity___17932	female_bins_95_identity___2426
COG1129		ABC-type sugar transport system	2	2	1	387	280	387	249		1544	1544	1544		female_bins_95_identity___18397	female_bins_95_identity___15454
COG1352		Methylase of chemotaxis methyl-accepting proteins (CheR) (PDB:1AF7)	2	2	1	386	2782	386	2437		779	779	779		female_bins_95_identity___422	female_bins_95_identity___15774
COG4211		ABC-type glucose/galactose transport system	2	2	1	387	281	387	250		1016	1016	1016		female_bins_95_identity___18398	female_bins_95_identity___15453
COG0205		6-phosphofructokinase (PfkA) (PDB:1KZH)	2	2	1	387	360	387	528		974	974	974		female_bins_95_identity___18440	female_bins_95_identity___9701
COG0782		Transcription elongation factor	2	2	1	387	349	387	292		488	488	488		female_bins_95_identity___18451	female_bins_95_identity___9689
COG0166		Glucose-6-phosphate isomerase (Pgi) (PDB:1B0Z)	2	2	1	388	143	388	101		1346	1346	1346		female_bins_95_identity___19014	female_bins_95_identity___8715
COG1077		Cell shape-determining ATPase MreB	2	2	1	386	4397	386	3632		992	992	992		female_bins_95_identity___1558	female_bins_95_identity___10374
COG1454		Alcohol dehydrogenase	2	2	1	386	1306	386	5870		1148	1148	1148		female_bins_95_identity___19070	female_bins_95_identity___12337
COG0443		Molecular chaperone DnaK (HSP70) (DnaK) (PDB:3I33)	2	2	1	386	2252	386	5727		1874	1874	1874		female_bins_95_identity___19510	female_bins_95_identity___5912
COG0595		mRNA degradation ribonuclease J1/J2 (RnjA) (PDB:3T3N)	2	2	1	386	2311	386	5738		1670	1673	1671		female_bins_95_identity___19524	female_bins_95_identity___5901
COG1063		Threonine dehydrogenase or related Zn-dependent dehydrogenase (Tdh) (PDB:4A2C)	2	2	1	386	2339	386	5658		1262	1262	1262		female_bins_95_identity___19535	female_bins_95_identity___9260
COG3968		Glutamine synthetase type III (GlnA3)	2	2	1	386	2345	386	5792		2111	2111	2111		female_bins_95_identity___19539	female_bins_95_identity___5850
group_229	COG1175	ABC-type sugar transport system	2	2	1	386	1313	386	5879		962	962	962		female_bins_95_identity___19592	female_bins_95_identity___12344
COG4657		Na+-translocating ferredoxin:NAD+ oxidoreductase RNF	2	2	1	386	2813	386	2431		587	587	587		female_bins_95_identity___428	female_bins_95_identity___15768
COG0191		Fructose/tagatose bisphosphate aldolase (Fba) (PDB:1B57)	2	2	1	386	1321	386	5923		863	863	863		female_bins_95_identity___19603	female_bins_95_identity___12352
COG1167		DNA-binding transcriptional regulator	2	2	1	386	1835	386	6257		1283	1283	1283		female_bins_95_identity___20084	female_bins_95_identity___8596
group_232			2	2	1	386	1745	386	6317		329	329	329		female_bins_95_identity___20100		female_bins_95_identity___16058
COG2715		Spore maturation protein SpmA (function unknown) (SpmA)	2	2	1	386	1640	386	6373		338	641	489		female_bins_95_identity___20156	female_bins_95_identity___15824
COG1925		HPr or related phosphotransfer protein (PtsH) (PDB:1CM2)	2	2	1	386	1601	386	6422		254	254	254		female_bins_95_identity___20195	female_bins_95_identity___8087
COG4496		Predicted DNA-binding transcriptional regulator YerC	2	2	1	386	4080	386	3279		296	323	309		female_bins_95_identity___20197	female_bins_95_identity___7305
COG0629		Single-stranded DNA-binding protein (Ssb) (PDB:1EQQ)	2	2	1	386	4088	386	3286		674	674	674		female_bins_95_identity___20205	female_bins_95_identity___7312
COG1217		Predicted membrane GTPase TypA/BipA involved in stress response (TypA) (PDB:5A9V)	2	2	1	386	4089	386	3287		1832	1832	1832		female_bins_95_identity___20206	female_bins_95_identity___7313
COG3409		Peptidoglycan-binding (PGRP) domain of peptidoglycan hydrolases (PGRP) (PDB:4FET)	2	2	1	386	4095	386	3298		482	1262	872		female_bins_95_identity___20207	female_bins_95_identity___7319
group_239			2	2	1	4	102	4	75		383	953	668			female_bins_95_identity___5185	female_bins_95_identity___9625
COG5824		Stage III sporulation protein SpoIIIAC	2	2	1	386	2831	386	2398		194	206	200		female_bins_95_identity___438	female_bins_95_identity___13951
COG3601		Riboflavin transporter FmnP (FmnP) (PDB:3P5N)	2	2	1	393	32	393	1		239	1325	782			female_bins_95_identity___7448	female_bins_95_identity___18263
COG4108		Peptide chain release factor RF-3 (PrfC) (PDB:3UOQ)	2	2	1	386	2837	386	2392		1595	1595	1595		female_bins_95_identity___444	female_bins_95_identity___13944
group_2527	COG0828	Ribosomal protein S21 (RpsU) (PDB:4V4H)	2	2	1	386	6230	386	2700		176	176	176		female_bins_95_identity___2207		female_bins_95_identity___6526
group_253			2	2	1	1	241	1	338		269	269	269			female_bins_95_identity___11338	female_bins_95_identity___7257
COG1136		ABC-type lipoprotein export system	2	2	1	387	107	387	209		767	767	767			female_bins_95_identity___15494	female_bins_95_identity___237
COG0745		DNA-binding response regulator	2	2	1	387	105	387	207		662	698	680			female_bins_95_identity___15495	female_bins_95_identity___236
COG0714		MoxR-like ATPase (MoxR) (PDB:2R44)	2	2	1	386	6450	386	2765		815	815	815		female_bins_95_identity___575	female_bins_95_identity___11846
COG3825		Uncharacterized CoxE-like protein	2	2	1	386	6449	386	2764		1202	1202	1202		female_bins_95_identity___576	female_bins_95_identity___11845
COG0291		Ribosomal protein L35 (RpmI) (PDB:1VS6) (PUBMED:28373563)	2	2	1	386	2589	386	1548		197	197	197		female_bins_95_identity___3095	female_bins_95_identity___16087
COG1536		Flagellar motor switch protein FliG (FliG) (PDB:4FHR)	2	2	1	386	5192	386	4399		1007	1010	1008		female_bins_95_identity___3481	female_bins_95_identity___7335
group_298			2	2	1	19	78	19	101		221	221	221						female_bins_95_identity___1513	female_bins_95_identity___1293
group_299	COG0254	Ribosomal protein L31 (RpmE) (PDB:1VS6)	2	2	1	3	158	3	106		254	254	254						female_bins_95_identity___4570	female_bins_95_identity___5473
group_300	COG0776	Bacterial nucleoid DNA-binding protein IHF-alpha (HimA) (PDB:1B8Z)	2	2	1	3	216	3	121		272	275	273						female_bins_95_identity___4585	female_bins_95_identity___1224
group_301	COG0052	Ribosomal protein S2 (RpsB) (PDB:4V4H)	2	2	1	3	86	3	221		836	836	836						female_bins_95_identity___4605	female_bins_95_identity___6213
COG3839		ABC-type sugar transport system	2	2	1	386	1587	386	6434		1112	1112	1112		female_bins_95_identity___3603	female_bins_95_identity___8083
COG0450		Alkyl hydroperoxide reductase subunit AhpC (peroxiredoxin) (AhpC) (PDB:2RII)	2	2	1	34	63	34	65		566	566	566						female_bins_95_identity___6070	female_bins_95_identity___3676
group_303	COG0049	Ribosomal protein S7 (RpsG) (PDB:4V4H)	2	2	1	11	126	11	85		476	476	476						female_bins_95_identity___6838	female_bins_95_identity___6230
group_304	COG0480	Translation elongation factor EF-G	2	2	1	11	125	11	84		2126	2126	2126						female_bins_95_identity___6839	female_bins_95_identity___6231
group_305	COG0185	Ribosomal protein S19 (RpsS) (PDB:4V4H)	2	2	1	11	119	11	78		269	269	269						female_bins_95_identity___6845	female_bins_95_identity___6237
group_306	COG0092	Ribosomal protein S3 (RpsC) (PDB:1VS6)	2	2	1	11	117	11	76		734	749	741						female_bins_95_identity___6847	female_bins_95_identity___6239
group_307	COG0197	Ribosomal protein L16/L10AE (RplP) (PDB:1WKI)	2	2	1	11	116	11	74		431	431	431						female_bins_95_identity___6848	female_bins_95_identity___6240
COG0828		Ribosomal protein S21 (RpsU) (PDB:4V4H)	2	2	1	47	46	47	61		191	290	240						female_bins_95_identity___9294	female_bins_95_identity___14830
group_309	COG0184	Ribosomal protein S15P/S13E (RpsO) (PDB:4V4H)	2	2	1	52	47	51	44		275	275	275						female_bins_95_identity___9867	female_bins_95_identity___19092
COG0236		Acyl carrier protein (AcpP) (PDB:1ACP)	2	2	1	24	74	24	54		233	236	234						female_bins_95_identity___10450	female_bins_95_identity___1713
COG0267		Ribosomal protein L33 (RpmG) (PDB:1VS6)	2	2	1	7	83	7	81		188	188	188						female_bins_95_identity___19386	female_bins_95_identity___18026
group_312			2	2	1	7	78	7	85		149	149	149						female_bins_95_identity___19387	female_bins_95_identity___18025
COG0292		Ribosomal protein L20 (RplT) (PDB:1VS6) (PUBMED:30270044)	2	2	1	6	91	6	59		350	350	350						female_bins_95_identity___19995	female_bins_95_identity___7677
group_3135	COG0238	Ribosomal protein S18 (RpsR) (PDB:4V4H)	2	2	1	387	539	387	427		263	263	263		female_bins_95_identity___4287	female_bins_95_identity___9801
group_3144	COG1882	Pyruvate-formate lyase (PflD) (PDB:1CM5)	2	2	1	387	526	387	444		2039	2039	2039		female_bins_95_identity___4299	female_bins_95_identity___9785
COG0197		Ribosomal protein L16/L10AE (RplP) (PDB:1WKI)	2	2	1	386	4693	386	4074		437	437	437		female_bins_95_identity___5307	female_bins_95_identity___14736
COG0096		Ribosomal protein S8 (RpsH) (PDB:4V4H)	2	2	1	386	4707	386	4087		401	401	401		female_bins_95_identity___5314	female_bins_95_identity___14743
COG0098		Ribosomal protein S5 (RpsE) (PDB:4V4H)	2	2	1	386	4710	386	4090		509	509	509		female_bins_95_identity___5317	female_bins_95_identity___14746
COG1841		Ribosomal protein L30/L7E (RpmD) (PDB:1VS6)	2	2	1	386	4711	386	4091		182	182	182		female_bins_95_identity___5318	female_bins_95_identity___14747
COG0200		Ribosomal protein L15 (RplO) (PDB:1VS6)	2	2	1	386	4713	386	4093		446	446	446		female_bins_95_identity___5319	female_bins_95_identity___14748
COG0257		Ribosomal protein L36 (RpmJ) (PDB:1DFE) (PUBMED:21627333)	2	2	1	386	4721	386	4108		113	113	113		female_bins_95_identity___5325	female_bins_95_identity___14754
group_3358	COG0100	Ribosomal protein S11 (RpsK) (PDB:4V4H)	2	2	1	386	4723	386	4110		395	395	395		female_bins_95_identity___5327	female_bins_95_identity___14756
COG0202		DNA-directed RNA polymerase	2	2	1	386	4733	386	4119		965	965	965		female_bins_95_identity___5329	female_bins_95_identity___14758
COG1250		3-hydroxyacyl-CoA dehydrogenase (FadB) (PDB:5ZQZ)	2	2	1	386	2008	386	817		842	842	842		female_bins_95_identity___6102	female_bins_95_identity___18697
COG1960		Acyl-CoA dehydrogenase related to the alkylation response protein AidB (CaiA) (PDB:1BUC)	2	2	1	386	2009	386	818		1166	1166	1166		female_bins_95_identity___6103	female_bins_95_identity___18696
COG1551		sRNA-binding carbon storage regulator CsrA (CsrA) (PDB:1T3O)	2	2	1	386	2110	386	6203		230	230	230		female_bins_95_identity___7591	female_bins_95_identity___13554
COG0524		Sugar or nucleoside kinase	2	2	1	393	39	393	22		1034	1034	1034		female_bins_95_identity___11538	female_bins_95_identity___7455
group_4271	COG0048	Ribosomal protein S12 (RpsL) (PDB:4V4H)	2	2	1	386	1359	386	1091		419	419	419		female_bins_95_identity___13653	female_bins_95_identity___12356
COG0057		Glyceraldehyde-3-phosphate dehydrogenase/erythrose-4-phosphate dehydrogenase (GapA) (PDB:3ZDF)	2	2	1	386	3325	386	1633		1016	1016	1016		female_bins_95_identity___13994	female_bins_95_identity___1400
COG0423		Glycyl-tRNA synthetase	2	2	1	386	6389	386	2704		1391	1391	1391		female_bins_95_identity___2205	female_bins_95_identity___11814
COG1883		Na+-transporting oxaloacetate/methylmalonyl-CoA decarboxylase	2	2	1	386	2765	386	2445		1148	1148	1148		female_bins_95_identity___2224	female_bins_95_identity___15782
COG1209		dTDP-glucose pyrophosphorylase (RmlA1) (PDB:1FXO)	2	2	1	386	3944	386	4708		869	869	869		female_bins_95_identity___2570	female_bins_95_identity___13191
COG0056		FoF1-type ATP synthase	2	2	1	386	1214	386	641		1505	1505	1505		female_bins_95_identity___16191	female_bins_95_identity___5965
COG0055		FoF1-type ATP synthase	2	2	1	386	1235	386	644		1391	1391	1391		female_bins_95_identity___16193	female_bins_95_identity___5963
group_4537	COG0205	6-phosphofructokinase (PfkA) (PDB:1KZH)	2	2	1	386	1261	386	684		1073	1073	1073		female_bins_95_identity___16219	female_bins_95_identity___12319
COG1109		Phosphomannomutase (ManB) (PDB:6MNV)	2	2	1	386	3899	386	4699		1727	1727	1727		female_bins_95_identity___2579	female_bins_95_identity___13200
COG0254		Ribosomal protein L31 (RpmE) (PDB:1VS6)	2	2	1	386	3463	386	5503		206	206	206		female_bins_95_identity___16837	female_bins_95_identity___18227
COG0333		Ribosomal protein L32 (RpmF) (PDB:1VS6) (PUBMED:17114934)	2	2	1	386	5823	386	5491		179	179	179		female_bins_95_identity___16849	female_bins_95_identity___11910
group_49	COG1077	Cell shape-determining ATPase MreB	2	2	1	386	146	386	1390		1010	1010	1010		female_bins_95_identity___2997	female_bins_95_identity___6643
COG0440		Acetolactate synthase	2	2	1	386	6550	386	1941		482	482	482		female_bins_95_identity___16873	female_bins_95_identity___6730
COG0059		Ketol-acid reductoisomerase (IlvC) (PDB:1NP3)	2	2	1	386	6552	386	1915		1025	1025	1025		female_bins_95_identity___16875	female_bins_95_identity___6728
COG2894		Septum site-determining ATPase MinD (MinD) (PDB:4V02)	2	2	1	386	151	386	1379		809	809	809		female_bins_95_identity___3002	female_bins_95_identity___6648
COG0822		Fe-S cluster assembly scaffold protein IscU	2	2	1	386	5500	386	2918		704	704	704		female_bins_95_identity___16969	female_bins_95_identity___19257
COG0851		Septum formation topological specificity factor MinE (MinE) (PDB:1EV0)	2	2	1	386	153	386	1374		269	269	269		female_bins_95_identity___3003	female_bins_95_identity___6649
COG1803		Methylglyoxal synthase (MgsA) (PDB:1S8A) (PUBMED:9665712)	2	2	1	386	155	386	1372		395	395	395		female_bins_95_identity___3005	female_bins_95_identity___6651
COG1837		Predicted RNA-binding protein YlqC	2	2	1	386	6501	386	2816		230	230	230		female_bins_95_identity___17446	female_bins_95_identity___11897
COG1866		Phosphoenolpyruvate carboxykinase	2	2	1	386	3186	386	5264		1718	1718	1718		female_bins_95_identity___17792	female_bins_95_identity___13877
COG0493		NADPH-dependent glutamate synthase beta chain or related oxidoreductase (GltD) (PDB:1H7X)	2	2	1	386	62	386	1472		1385	1385	1385		female_bins_95_identity___3019	female_bins_95_identity___6561
group_5300			2	2	1	386	2916	386	5114		170	170	170		female_bins_95_identity___17806		female_bins_95_identity___7945
COG0459		Chaperonin GroEL (HSP60 family) (GroEL) (PDB:1AON)	2	2	1	386	2664	386	5175		1625	1625	1625		female_bins_95_identity___17874	female_bins_95_identity___12730
COG0330		Regulator of protease activity HflC	2	2	1	386	5586	386	1517		914	914	914		female_bins_95_identity___3064	female_bins_95_identity___13857
COG4465		GTP-sensing pleiotropic transcriptional regulator CodY (CodY) (PDB:2B0L)	2	2	1	386	5187	386	4394		785	785	785		female_bins_95_identity___3476	female_bins_95_identity___7340
COG1868		Flagellar motor switch protein FliM (FliM) (PDB:2HP7)	2	2	1	386	5207	386	4415		980	980	980		female_bins_95_identity___3496	female_bins_95_identity___10863
COG4753		Two-component response regulator	2	2	1	386	5214	386	4417		362	362	362		female_bins_95_identity___3498	female_bins_95_identity___10865
COG1298		Flagellar biosynthesis protein FlhA (FlhA) (PDB:6AI0)	2	2	1	386	5220	386	4423		2039	2039	2039		female_bins_95_identity___3504	female_bins_95_identity___10871
COG1776		Phosphoaspartate phosphatase CheC	2	2	1	386	5227	386	4437		608	620	614		female_bins_95_identity___3511	female_bins_95_identity___10878
COG0052		Ribosomal protein S2 (RpsB) (PDB:4V4H)	2	2	1	386	5307	386	4510		737	740	738		female_bins_95_identity___3519	female_bins_95_identity___10886
COG1175		ABC-type sugar transport system	2	2	1	386	5349	386	4520		896	902	899		female_bins_95_identity___3529	female_bins_95_identity___13135
COG1051		ADP-ribose pyrophosphatase YjhB	2	2	1	386	253	386	1906		446	455	450		female_bins_95_identity___16883	female_bins_95_identity___6719
group_72	COG0395	ABC-type glycerol-3-phosphate transport system	2	2	1	386	5350	386	4763		905	905	905		female_bins_95_identity___3530	female_bins_95_identity___13136
COG0574		Phosphoenolpyruvate synthase/pyruvate phosphate dikinase (PpsA) (PDB:5HV6)	2	2	1	386	5356	386	4769		2636	2636	2636		female_bins_95_identity___3536	female_bins_95_identity___2877
COG0231		Translation elongation factor P (EF-P)/translation initiation factor 5A (eIF-5A) (Efp) (PDB:1UEB)	2	2	1	386	5381	386	4771		557	557	557		female_bins_95_identity___3560	female_bins_95_identity___2879
COG0696		Phosphoglycerate mutase (BPG-independent)	2	2	1	386	5396	386	4786		1541	1541	1541		female_bins_95_identity___3575	female_bins_95_identity___2431
COG0178		Excinuclease UvrABC ATPase subunit (UvrA) (PDB:2R6F)	2	2	1	386	4459	386	3636		2864	2888	2876		female_bins_95_identity___3953	female_bins_95_identity___10378
COG1219		ATP-dependent protease Clp	2	2	1	386	5125	386	4302		1268	1268	1268		female_bins_95_identity___3962	female_bins_95_identity___7374
COG0740		ATP-dependent protease ClpP	2	2	1	386	5124	386	4301		602	608	605		female_bins_95_identity___3963	female_bins_95_identity___7375
COG5852		Small acid-soluble spore protein SspA/SspB/SspC/SspD (alpha/beta-type) (SspA/SspB/SspC/SspD) (PUBMED:3009398	2	2	1	386	5121	386	4299		203	206	204		female_bins_95_identity___3965	female_bins_95_identity___7377
COG0360		Ribosomal protein S6 (RpsF) (PDB:4V4H)	2	2	1	387	541	387	425		290	290	290		female_bins_95_identity___4285	female_bins_95_identity___9803
COG2221		Dissimilatory sulfite reductase (desulfoviridin)	2	2	1	387	532	387	438		170	170	170		female_bins_95_identity___4293	female_bins_95_identity___9795
group_82			2	2	1	387	527	387	443		203	203	203		female_bins_95_identity___4298	female_bins_95_identity___9786
COG0395		ABC-type glycerol-3-phosphate transport system	2	2	1	386	4855	386	4245		914	917	915		female_bins_95_identity___4725	female_bins_95_identity___271
COG0087		Ribosomal protein L3 (RplC) (PDB:1VS6)	2	2	1	386	4684	386	4066		683	683	683		female_bins_95_identity___5300	female_bins_95_identity___14729
COG0088		Ribosomal protein L4 (RplD) (PDB:1VS6)	2	2	1	386	4686	386	4067		620	620	620		female_bins_95_identity___5301	female_bins_95_identity___14730
COG0090		Ribosomal protein L2 (RplB) (PDB:1VS6)	2	2	1	386	4688	386	4070		842	842	842		female_bins_95_identity___5303	female_bins_95_identity___14732
COG0185		Ribosomal protein S19 (RpsS) (PDB:4V4H)	2	2	1	386	4689	386	4071		281	281	281		female_bins_95_identity___5304	female_bins_95_identity___14733
COG0091		Ribosomal protein L22 (RplV) (PDB:1VS6)	2	2	1	386	4690	386	4072		392	392	392		female_bins_95_identity___5305	female_bins_95_identity___14734
COG0092		Ribosomal protein S3 (RpsC) (PDB:1VS6)	2	2	1	386	4691	386	4073		656	656	656		female_bins_95_identity___5306	female_bins_95_identity___14735
COG0186		Ribosomal protein S17 (RpsQ) (PDB:4V4H)	2	2	1	386	4695	386	4076		260	260	260		female_bins_95_identity___5309	female_bins_95_identity___14738
COG0094		Ribosomal protein L5 (RplE) (PDB:1VS6)	2	2	1	386	4698	386	4082		539	539	539		female_bins_95_identity___5312	female_bins_95_identity___14741
COG0137		Argininosuccinate synthase (ArgG) (PDB:1J1Z)	2	2	1	386	4963	386	4015		1214	1217	1215		female_bins_95_identity___6875	female_bins_95_identity___14686
COG0097		Ribosomal protein L6P/L9E (RplF) (PDB:1VS6)	2	2	1	386	4708	386	4088		542	542	542		female_bins_95_identity___5315	female_bins_95_identity___14744
COG0256		Ribosomal protein L18 (RplR) (PDB:1VS6)	2	2	1	386	4709	386	4089		368	368	368		female_bins_95_identity___5316	female_bins_95_identity___14745
COG0563		Adenylate kinase or related kinase (Adk) (PDB:1AK2)	2	2	1	386	4717	386	4095		641	641	641		female_bins_95_identity___5321	female_bins_95_identity___14750
COG1544		Ribosome-associated translation inhibitor RaiA (RaiA) (PDB:1IMU)	2	2	1	386	4758	386	4148		533	533	533		female_bins_95_identity___5354	female_bins_95_identity___278
group_10	COG0493	NADPH-dependent glutamate synthase beta chain or related oxidoreductase (GltD) (PDB:1H7X)	1	1	1	386	4746	386	4132		263	263	263		female_bins_95_identity___5342
group_100			1	1	1	386	4564	386	3839		272	272	272		female_bins_95_identity___5387
group_1000	COG0204	1-acyl-sn-glycerol-3-phosphate acyltransferase (PlsC) (PDB:1IUQ)	1	1	1	218	6	224	4		743	743	743	female_bins_95_identity___14066
group_10000	COG2954	CYTH domain	1	1	1	397	58	397	19		500	500	500			female_bins_95_identity___17751
group_10001	COG5279	Cytokinesis protein 3	1	1	1	397	59	397	18		3227	3227	3227			female_bins_95_identity___17752
group_10002			1	1	1	397	60	397	17		740	740	740			female_bins_95_identity___17753
group_10003			1	1	1	397	61	397	16		713	713	713			female_bins_95_identity___17754
group_10004	COG3279	DNA-binding response regulator	1	1	1	397	62	397	15		461	461	461			female_bins_95_identity___17755
group_10005	COG0534	Na+-driven multidrug efflux pump	1	1	1	397	66	397	14		1385	1385	1385			female_bins_95_identity___17756
group_10006	COG0527	Aspartate kinase (MetL1) (PDB:2CDQ)	1	1	1	397	65	397	13		1319	1319	1319			female_bins_95_identity___17757
group_10007	COG0460	Homoserine dehydrogenase (ThrA) (PDB:5AVO) (PUBMED:29124164)	1	1	1	397	64	397	12		1202	1202	1202			female_bins_95_identity___17758
group_10008	COG4492	ACT domain-containing protein	1	1	1	397	63	397	11		443	443	443			female_bins_95_identity___17759
COG3695		Alkylated DNA nucleotide flippase Atl1	1	1	1	439	1	438	1		317	317	317			female_bins_95_identity___17760
group_1001	COG0187	DNA gyrase/topoisomerase IV	1	1	1	218	7	224	5		1871	1871	1871	female_bins_95_identity___14067
COG3910		Predicted ATPase	1	1	1	439	2	438	2		857	857	857			female_bins_95_identity___17761
group_10011			1	1	1	439	3	438	3		398	398	398			female_bins_95_identity___17762
group_10012	COG0566	tRNA G18 (ribose-2'-O)-methylase SpoU (SpoU) (PDB:1GZ0)	1	1	1	439	4	438	6		827	827	827			female_bins_95_identity___17763
COG1254		Acylphosphatase (AcyP) (PDB:1APS)	1	1	1	439	6	438	5		266	266	266			female_bins_95_identity___17764
group_10014			1	1	1	439	5	438	4		302	302	302			female_bins_95_identity___17765
group_10015	COG1191	DNA-directed RNA polymerase specialized sigma subunit (FliA) (PDB:1RP3)	1	1	1	386	257	386	1759		287	287	287			female_bins_95_identity___18198
group_10016	COG1199	Rad3-related DNA helicase DinG (DinG) (PDB:5H8W)	1	1	1	386	258	386	1760		2009	2009	2009			female_bins_95_identity___18199
group_10017			1	1	1	386	259	386	1761		128	128	128			female_bins_95_identity___18200
group_10018			1	1	1	386	260	386	1762		269	269	269			female_bins_95_identity___18201
group_10019			1	1	1	386	261	386	1763		185	185	185			female_bins_95_identity___18202
group_1002	COG0188	DNA gyrase/topoisomerase IV	1	1	1	218	8	224	6		2663	2663	2663	female_bins_95_identity___14068
group_10020	COG1961	Site-specific DNA recombinase SpoIVCA/DNA invertase PinE (SpoIVCA) (PDB:1GDT)	1	1	1	386	262	386	1764		1682	1682	1682			female_bins_95_identity___18203
group_10021	COG1961	Site-specific DNA recombinase SpoIVCA/DNA invertase PinE (SpoIVCA) (PDB:1GDT)	1	1	1	386	263	386	1765		1709	1709	1709			female_bins_95_identity___18204
group_10022	COG1961	Site-specific DNA recombinase SpoIVCA/DNA invertase PinE (SpoIVCA) (PDB:1GDT)	1	1	1	386	264	386	1766		1580	1580	1580			female_bins_95_identity___18205
COG0326		Molecular chaperone	1	1	1	386	265	386	1767		3203	3203	3203			female_bins_95_identity___18206
group_10024	COG0847	DNA polymerase III	1	1	1	386	266	386	1768		584	584	584			female_bins_95_identity___18207
group_10025			1	1	1	386	267	386	1769		1109	1109	1109			female_bins_95_identity___18208
group_10026	COG0597	Lipoprotein signal peptidase (LspA) (PDB:5DIR)	1	1	1	386	268	386	1770		491	491	491			female_bins_95_identity___18209
group_10027	COG0549	Carbamate kinase (ArcC) (PDB:2E9Y)	1	1	1	386	269	386	1771		935	935	935			female_bins_95_identity___18210
group_10028	COG0524	Sugar or nucleoside kinase	1	1	1	386	270	386	1772		1085	1085	1085			female_bins_95_identity___18211
group_10029	COG0265	Periplasmic serine protease	1	1	1	386	271	386	1773		1526	1526	1526			female_bins_95_identity___18212
group_1003	COG0703	Shikimate kinase (AroK) (PDB:1E6C)	1	1	1	218	9	224	10		527	527	527	female_bins_95_identity___14069
group_10030	COG0745	DNA-binding response regulator	1	1	1	386	272	386	1774		707	707	707			female_bins_95_identity___18213
group_10031	COG2205	K+-sensing histidine kinase KdpD (KdpD) (PDB:2KSF)	1	1	1	386	273	386	1775		1157	1157	1157			female_bins_95_identity___18214
group_10032	COG0366	Glycosidase/amylase (phosphorylase) (AmyA) (PDB:2P67) (PUBMED:29684280)	1	1	1	386	274	386	1776		1748	1748	1748			female_bins_95_identity___18215
group_10033			1	1	1	386	275	386	1777		1613	1613	1613			female_bins_95_identity___18216
group_10034			1	1	1	386	276	386	1778		887	887	887			female_bins_95_identity___18217
group_10035	COG0458	Carbamoylphosphate synthase large subunit (CarB) (PDB:1C30)	1	1	1	386	277	386	1779		3245	3245	3245			female_bins_95_identity___18218
group_10036	COG1014	Pyruvate:ferredoxin oxidoreductase or related 2-oxoacid:ferredoxin oxidoreductase	1	1	1	386	278	386	1780		569	569	569			female_bins_95_identity___18219
group_10037	COG4231	TPP-dependent indolepyruvate ferredoxin oxidoreductase	1	1	1	386	279	386	1781		1736	1736	1736			female_bins_95_identity___18220
COG0318		O-succinylbenzoic acid-CoA ligase MenE or related acyl-CoA synthetase (AMP-forming) (MenE/FadK) (PDB:5EY9) (PUBMED:25151136	1	1	1	386	280	386	1782		1634	1634	1634			female_bins_95_identity___18221
COG2256		Replication-associated recombination protein RarA (DNA-dependent ATPase) (RarA) (PDB:3PVS)	1	1	1	386	281	386	1783		1334	1334	1334			female_bins_95_identity___18222
group_1004	COG0796	Glutamate racemase (MurI) (PDB:1B73)	1	1	1	218	10	224	9		770	770	770	female_bins_95_identity___14070
group_10040			1	1	1	386	282	386	1784		515	515	515			female_bins_95_identity___18223
group_10041	COG1242	Radical SAM superfamily enzyme (YhcC)	1	1	1	386	283	386	1785		950	950	950			female_bins_95_identity___18224
group_10042	COG0281	Malic enzyme (SfcA) (PDB:1DO8)	1	1	1	386	284	386	1786		1175	1175	1175			female_bins_95_identity___18225
group_10043	COG1158	Transcription termination factor Rho (Rho) (PDB:1PVO)	1	1	1	386	285	386	1787		1496	1496	1496			female_bins_95_identity___18226
COG3872		Uncharacterized conserved protein YqhQ	1	1	1	386	3462	386	1758		953	953	953			female_bins_95_identity___18228
group_10045	COG2890	Methylase of polypeptide chain release factors (HemK) (PDB:1NV8)	1	1	1	386	3461	386	1757		857	857	857			female_bins_95_identity___18229
COG0216		Protein chain release factor RF1 (PrfA) (PDB:1RQ0)	1	1	1	386	3460	386	1756		1076	1076	1076			female_bins_95_identity___18230
group_10047			1	1	1	386	3459	386	1755		785	785	785			female_bins_95_identity___18231
group_10048			1	1	1	386	3458	386	1754		371	371	371			female_bins_95_identity___18232
group_10049			1	1	1	386	3457	386	1753		200	200	200			female_bins_95_identity___18233
group_1005	COG1674	DNA segregation ATPase FtsK/SpoIIIE or related protein (FtsK) (PDB:2IUT)	1	1	1	218	2	224	8		2843	2843	2843	female_bins_95_identity___14071
group_10050			1	1	1	386	3456	386	1752		611	611	611			female_bins_95_identity___18234
group_10051			1	1	1	386	3455	386	1751		227	227	227			female_bins_95_identity___18235
COG3973		DNA helicase IV (HelD)	1	1	1	386	3454	386	1750		2090	2090	2090			female_bins_95_identity___18236
group_10053	COG0128	5-enolpyruvylshikimate-3-phosphate synthase (AroA) (PDB:4N3P)	1	1	1	386	3453	386	1749		1301	1301	1301			female_bins_95_identity___18237
group_10054	COG1396	Transcriptional regulator	1	1	1	386	3452	386	1748		236	236	236			female_bins_95_identity___18238
group_10055			1	1	1	386	3451	386	1747		179	179	179			female_bins_95_identity___18239
group_10056	COG0726	Peptidoglycan/xylan/chitin deacetylase	1	1	1	386	3450	386	1746		881	881	881			female_bins_95_identity___18240
group_10057			1	1	1	386	3449	386	1745		95	95	95			female_bins_95_identity___18241
group_10058			1	1	1	386	3448	386	1744		374	374	374			female_bins_95_identity___18242
group_10059			1	1	1	386	3447	386	1743		1145	1145	1145			female_bins_95_identity___18243
group_1006			1	1	1	218	1	224	7		662	662	662	female_bins_95_identity___14072
group_10060	COG1835	Peptidoglycan/LPS O-acetylase OafA/YrhL	1	1	1	386	3446	386	1742		1754	1754	1754			female_bins_95_identity___18244
group_10061	COG0079	Histidinol-phosphate/aromatic aminotransferase or cobyric acid decarboxylase (HisC) (PDB:4R2N)	1	1	1	386	3445	386	1741		1058	1058	1058			female_bins_95_identity___18245
group_10062	COG2035	Uncharacterized membrane protein	1	1	1	386	3444	386	1740		860	860	860			female_bins_95_identity___18246
group_10063	COG2226	Ubiquinone/menaquinone biosynthesis C-methylase UbiE/MenG (UbiE) (PDB:4OBW)	1	1	1	386	3443	386	1739		785	785	785			female_bins_95_identity___18247
group_10064	COG1281	Redox-regulated molecular chaperone	1	1	1	386	3442	386	1738		878	878	878			female_bins_95_identity___18248
group_10065			1	1	1	386	3441	386	1737		749	749	749			female_bins_95_identity___18249
COG0174		Glutamine synthetase (GlnA) (PDB:1F1H)	1	1	1	386	3440	386	1736		1331	1331	1331			female_bins_95_identity___18250
group_10067	COG3707	Two-component response regulator	1	1	1	386	3439	386	1735		542	542	542			female_bins_95_identity___18251
group_10068	COG0662	Mannose-6-phosphate isomerase	1	1	1	386	3438	386	1734		1361	1361	1361			female_bins_95_identity___18252
group_10069	COG0253	Diaminopimelate epimerase (DapF) (PDB:1BWZ)	1	1	1	386	3437	386	1733		872	872	872			female_bins_95_identity___18253
group_1007			1	1	1	14	1	14	42		1247	1247	1247	female_bins_95_identity___14398
group_10070	COG1696	D-alanyl-lipoteichoic acid acyltransferase DltB	1	1	1	386	3436	386	1732		1409	1409	1409			female_bins_95_identity___18254
group_10071			1	1	1	386	3435	386	1731		1133	1133	1133			female_bins_95_identity___18255
group_10072	COG1595	DNA-directed RNA polymerase specialized sigma subunit	1	1	1	386	3434	386	1730		521	521	521			female_bins_95_identity___18256
group_10073			1	1	1	386	3433	386	1729		662	662	662			female_bins_95_identity___18257
group_10074			1	1	1	386	3432	386	1728		614	614	614			female_bins_95_identity___18258
group_10075	COG1696	D-alanyl-lipoteichoic acid acyltransferase DltB	1	1	1	386	3431	386	1727		1445	1445	1445			female_bins_95_identity___18259
group_10076			1	1	1	386	3430	386	1726		1190	1190	1190			female_bins_95_identity___18260
group_10077	COG2161	Antitoxin component YafN of the YafNO toxin-antitoxin module	1	1	1	386	3429	386	1725		413	413	413			female_bins_95_identity___18261
COG2026		mRNA-degrading endonuclease RelE	1	1	1	386	3428	386	1724		359	359	359			female_bins_95_identity___18262
group_10079			1	1	1	386	2023	386	5936		110	110	110			female_bins_95_identity___18675
group_1008	COG0550	DNA topoisomerase IA (TopA) (PDB:1CY0)	1	1	1	14	2	14	43		2087	2087	2087	female_bins_95_identity___14399
group_10080	COG4584	Transposase	1	1	1	386	2024	386	5937		1562	1562	1562			female_bins_95_identity___18676
group_10081			1	1	1	386	2025	386	5938		377	377	377			female_bins_95_identity___18677
group_10082			1	1	1	386	2026	386	5939		206	206	206			female_bins_95_identity___18678
group_10083	COG1475	Chromosome segregation protein Spo0J	1	1	1	386	2027	386	5940		1055	1055	1055			female_bins_95_identity___18679
group_10084	COG1192	ParA-like ATPase involved in chromosome/plasmid partitioning or cellulose biosynthesis protein BcsQ (ParA) (PDB:6NOO)	1	1	1	386	2028	386	5941		824	824	824			female_bins_95_identity___18680
group_10085	COG1404	Serine protease	1	1	1	386	2029	386	5942		1703	1703	1703			female_bins_95_identity___18681
group_10086	COG0546	Phosphoglycolate phosphatase	1	1	1	386	2020	386	825		845	845	845			female_bins_95_identity___18685
group_10087	COG2211	Na+/melibiose symporter or related transporter (MelB) (PDB:4M64)	1	1	1	386	2019	386	826		1391	1391	1391			female_bins_95_identity___18686
group_10088	COG3250	Beta-galactosidase/beta-glucuronidase (LacZ) (PDB:5N6U) (PUBMED:19291314)	1	1	1	386	2018	386	827		2264	2264	2264			female_bins_95_identity___18687
group_10089	COG4753	Two-component response regulator	1	1	1	386	2017	386	828		1250	1250	1250			female_bins_95_identity___18688
group_1009	COG0262	Dihydrofolate reductase (FolA) (PDB:1DDR)	1	1	1	14	3	14	44		518	518	518	female_bins_95_identity___14400
group_10090	COG3610	Uncharacterized membrane protein YjjB	1	1	1	386	2016	386	829		473	473	473			female_bins_95_identity___18689
COG2966		Uncharacterized membrane protein YjjP	1	1	1	386	2015	386	830		785	785	785			female_bins_95_identity___18690
group_10092	COG0280	Phosphotransacetylase (includes Pta	1	1	1	386	2014	386	831		920	920	920			female_bins_95_identity___18691
COG4636		Endonuclease	1	1	1	386	2012	386	848		542	542	542			female_bins_95_identity___18693
group_10094	COG3943	Uncharacterized protein RhuM	1	1	1	386	2003	386	812		1025	1025	1025			female_bins_95_identity___18700
COG1205		ATP-dependent helicase YprA	1	1	1	386	2002	386	811		2120	2120	2120			female_bins_95_identity___18701
group_10096	COG4372	Uncharacterized protein	1	1	1	386	2001	386	810		1388	1388	1388			female_bins_95_identity___18702
group_10097			1	1	1	386	2000	386	809		1601	1601	1601			female_bins_95_identity___18703
group_10098	COG2885	Outer membrane protein OmpA and related peptidoglycan-associated (lipo)proteins (OmpA) (PDB:1OAP)	1	1	1	386	1999	386	808		929	929	929			female_bins_95_identity___18704
group_10099	COG1196	Chromosome segregation ATPase Smc (Smc) (PDB:5XG3)	1	1	1	386	1998	386	807		1163	1163	1163			female_bins_95_identity___18705
group_101			1	1	1	386	4561	386	3836		272	272	272		female_bins_95_identity___5390
group_1010			1	1	1	14	4	14	45		278	278	278	female_bins_95_identity___14401
group_10100	COG0739	Murein DD-endopeptidase MepM and murein hydrolase activator NlpD	1	1	1	386	1997	386	806		1061	1061	1061			female_bins_95_identity___18706
group_10101	COG0627	S-formylglutathione hydrolase FrmB (FrmB) (PDB:1DQY)	1	1	1	386	1996	386	805		494	494	494			female_bins_95_identity___18707
group_10102	COG2211	Na+/melibiose symporter or related transporter (MelB) (PDB:4M64)	1	1	1	386	1995	386	804		1079	1079	1079			female_bins_95_identity___18708
group_10103			1	1	1	386	1994	386	803		995	995	995			female_bins_95_identity___18709
group_10104	COG1674	DNA segregation ATPase FtsK/SpoIIIE or related protein (FtsK) (PDB:2IUT)	1	1	1	386	1993	386	802		3731	3731	3731			female_bins_95_identity___18710
group_10105			1	1	1	386	1992	386	801		500	500	500			female_bins_95_identity___18711
group_10106			1	1	1	386	1991	386	800		1220	1220	1220			female_bins_95_identity___18712
COG0433		Archaeal DNA helicase HerA or a related bacterial ATPase	1	1	1	386	1990	386	799		2603	2603	2603			female_bins_95_identity___18713
group_10108			1	1	1	386	1989	386	798		476	476	476			female_bins_95_identity___18714
group_10109			1	1	1	386	1988	386	797		551	551	551			female_bins_95_identity___18715
group_1011	COG0358	DNA primase (bacterial type) (DnaG) (PDB:3B39) (PUBMED:28128549)	1	1	1	14	5	14	46		2045	2045	2045	female_bins_95_identity___14402
group_10110	COG0515	Serine/threonine protein kinase (SPS1) (PDB:6G4J)	1	1	1	386	1987	386	796		2837	2837	2837			female_bins_95_identity___18716
group_10111	COG0542	ATP-dependent Clp protease	1	1	1	386	1986	386	795		1937	1937	1937			female_bins_95_identity___18717
group_10112	COG0602	Organic radical activating enzyme NrdG/QueE (QueE) (PUBMED:14660578	1	1	1	386	1985	386	794		578	578	578			female_bins_95_identity___18718
group_10113			1	1	1	386	1984	386	793		653	653	653			female_bins_95_identity___18719
group_10114			1	1	1	386	1983	386	792		1295	1295	1295			female_bins_95_identity___18720
group_10115			1	1	1	386	1982	386	791		1421	1421	1421			female_bins_95_identity___18721
group_10116	COG4245	Uncharacterized conserved protein YegL	1	1	1	386	1981	386	790		791	791	791			female_bins_95_identity___18722
COG4245		Uncharacterized conserved protein YegL	1	1	1	386	1980	386	789		608	608	608			female_bins_95_identity___18723
group_10118			1	1	1	386	1979	386	788		1391	1391	1391			female_bins_95_identity___18724
group_10119	COG4245	Uncharacterized conserved protein YegL	1	1	1	386	1978	386	787		896	896	896			female_bins_95_identity___18725
group_1012			1	1	1	14	6	14	47		359	359	359	female_bins_95_identity___14403
group_10120	COG4248	Uncharacterized conserved protein YegI with protein kinase and helix-hairpin-helix DNA-binding domains (YegI)	1	1	1	386	1977	386	786		1361	1361	1361			female_bins_95_identity___18726
group_10121	COG2310	Stress response protein SCP2 (TerZ) (PDB:2QNG)	1	1	1	386	1976	386	785		902	902	902			female_bins_95_identity___18727
group_10122			1	1	1	386	1975	386	784		299	299	299			female_bins_95_identity___18728
group_10123	COG0406	Broad specificity phosphatase PhoE (PhoE) (PDB:1EBB)	1	1	1	386	1974	386	783		611	611	611			female_bins_95_identity___18729
COG3833		ABC-type maltose transport system	1	1	1	386	1973	386	782		851	851	851			female_bins_95_identity___18730
group_10125	COG1175	ABC-type sugar transport system	1	1	1	386	1972	386	781		1394	1394	1394			female_bins_95_identity___18731
group_10126	COG2182	Maltose-binding periplasmic protein MalE (MalE) (PDB:1T0K)	1	1	1	386	1971	386	780		1322	1322	1322			female_bins_95_identity___18732
group_10127			1	1	1	386	5479	386	2878		320	320	320			female_bins_95_identity___19236
group_10128			1	1	1	386	5480	386	2879		167	167	167			female_bins_95_identity___19237
group_10129			1	1	1	386	5481	386	2880		137	137	137			female_bins_95_identity___19238
group_1013			1	1	1	14	7	14	48		101	101	101	female_bins_95_identity___14404
group_10130			1	1	1	386	5482	386	2881		593	593	593			female_bins_95_identity___19239
group_10131			1	1	1	386	5483	386	2882		647	647	647			female_bins_95_identity___19240
group_10132			1	1	1	386	5484	386	2883		98	98	98			female_bins_95_identity___19241
group_10133			1	1	1	386	5485	386	2884		527	527	527			female_bins_95_identity___19242
group_10134			1	1	1	386	5486	386	2885		227	227	227			female_bins_95_identity___19243
group_10135			1	1	1	386	5487	386	2886		227	227	227			female_bins_95_identity___19244
COG3378		DNA primase	1	1	1	386	5488	386	2887		2447	2447	2447			female_bins_95_identity___19245
group_10137			1	1	1	386	5489	386	2888		194	194	194			female_bins_95_identity___19246
group_10138			1	1	1	386	5490	386	2889		224	224	224			female_bins_95_identity___19247
group_10139			1	1	1	386	5491	386	2890		203	203	203			female_bins_95_identity___19248
group_1014			1	1	1	14	8	14	49		845	845	845	female_bins_95_identity___14405
group_10140	COG1396	Transcriptional regulator	1	1	1	386	5492	386	2891		773	773	773			female_bins_95_identity___19249
group_10141	COG4974	Site-specific recombinase XerD (XerD) (PDB:1A0P)	1	1	1	386	5493	386	2892		1199	1199	1199			female_bins_95_identity___19250
group_10142			1	1	1	386	5494	386	2893		164	164	164			female_bins_95_identity___19251
group_10143			1	1	1	386	5495	386	2894		191	191	191			female_bins_95_identity___19252
group_10144			1	1	1	386	5496	386	2895		182	182	182			female_bins_95_identity___19253
group_10145			1	1	1	386	5497	386	2896		233	233	233			female_bins_95_identity___19254
group_10146			1	1	1	386	5498	386	2897		170	170	170			female_bins_95_identity___19255
group_10147	COG1207	Bifunctional protein GlmU	1	1	1	386	3497	386	2922		665	665	665			female_bins_95_identity___19258
group_10148	COG2865	Predicted transcriptional regulator	1	1	1	386	3498	386	2923		812	812	812			female_bins_95_identity___19259
COG2865		Predicted transcriptional regulator	1	1	1	386	3499	386	2924		206	206	206			female_bins_95_identity___19260
group_1015	COG1600	Epoxyqueuosine reductase QueG (queuosine biosynthesis) (QueG) (PDB:5D08) (PUBMED:2150253)	1	1	1	14	9	14	50		683	683	683	female_bins_95_identity___14406
group_10150	COG0550	DNA topoisomerase IA (TopA) (PDB:1CY0)	1	1	1	386	3500	386	2925		3347	3347	3347			female_bins_95_identity___19261
COG1091		dTDP-4-dehydrorhamnose reductase (RfbD) (PDB:1KBZ)	1	1	1	386	3501	386	2926		1043	1043	1043			female_bins_95_identity___19262
group_10152			1	1	1	386	3502	386	2927		398	398	398			female_bins_95_identity___19263
COG0165		Argininosuccinate lyase (ArgH) (PDB:1AOS)	1	1	1	386	5505	386	4857		1382	1382	1382			female_bins_95_identity___19265
group_10154	COG4219	Signal transducer regulating beta-lactamase production	1	1	1	386	5506	386	4858		2633	2633	2633			female_bins_95_identity___19266
group_10155	COG3682	Transcriptional regulator	1	1	1	386	5507	386	4859		374	374	374			female_bins_95_identity___19267
group_10156			1	1	1	386	5508	386	4860		647	647	647			female_bins_95_identity___19268
group_10157	COG1116	ABC-type nitrate/sulfonate/bicarbonate transport system	1	1	1	386	5509	386	4861		788	788	788			female_bins_95_identity___19269
group_10158	COG0600	ABC-type nitrate/sulfonate/bicarbonate transport system	1	1	1	386	5510	386	4862		830	830	830			female_bins_95_identity___19270
group_10159	COG2013	AIM24 protein	1	1	1	386	5511	386	4863		761	761	761			female_bins_95_identity___19271
group_1016	COG2207	AraC-type DNA-binding domain and AraC-containing proteins (AraC) (PDB:1BL0)	1	1	1	14	10	14	51		1127	1127	1127	female_bins_95_identity___14407
group_10160	COG0127	Inosine/xanthosine triphosphate pyrophosphatase	1	1	1	386	5512	386	4864		647	647	647			female_bins_95_identity___19272
group_10161	COG0668	Small-conductance mechanosensitive channel (MscS) (PDB:2OAU)	1	1	1	386	5513	386	4865		881	881	881			female_bins_95_identity___19273
group_10162	COG4198	Uncharacterized conserved protein	1	1	1	386	5514	386	4866		1241	1241	1241			female_bins_95_identity___19274
group_10163	COG4826	Serine protease inhibitor (SERPIN)	1	1	1	386	5515	386	4867		1307	1307	1307			female_bins_95_identity___19275
group_10164	COG4826	Serine protease inhibitor (SERPIN)	1	1	1	386	5516	386	4868		1298	1298	1298			female_bins_95_identity___19276
group_10165			1	1	1	386	5517	386	4869		947	947	947			female_bins_95_identity___19277
group_10166	COG1595	DNA-directed RNA polymerase specialized sigma subunit	1	1	1	386	5518	386	4870		557	557	557			female_bins_95_identity___19278
group_10167			1	1	1	386	5519	386	4871		275	275	275			female_bins_95_identity___19279
group_10168	COG0681	Signal peptidase I (LepB) (PDB:1B12) (PUBMED:1925027)	1	1	1	386	5520	386	4872		512	512	512			female_bins_95_identity___19280
group_10169			1	1	1	386	5521	386	4873		1274	1274	1274			female_bins_95_identity___19281
group_1017	COG4845	Chloramphenicol O-acetyltransferase (CatA) (PDB:1CIA)	1	1	1	14	11	14	52		623	623	623	female_bins_95_identity___14408
group_10170	COG1123	ABC-type glutathione transport system ATPase component	1	1	1	386	5522	386	4874		1316	1316	1316			female_bins_95_identity___19282
group_10171	COG0444	ABC-type dipeptide/oligopeptide/nickel transport system	1	1	1	386	5523	386	4875		1841	1841	1841			female_bins_95_identity___19283
COG1173		ABC-type dipeptide/oligopeptide/nickel transport system	1	1	1	386	5524	386	4876		1019	1019	1019			female_bins_95_identity___19284
group_10173	COG0601	ABC-type dipeptide/oligopeptide/nickel transport system	1	1	1	386	5525	386	4877		1571	1571	1571			female_bins_95_identity___19285
group_10174	COG4166	ABC-type oligopeptide transport system	1	1	1	386	5526	386	4878		2249	2249	2249			female_bins_95_identity___19286
group_10175	COG0692	Uracil-DNA glycosylase (Ung) (PDB:1AKZ) (PUBMED:16237021)	1	1	1	386	5527	386	4879		680	680	680			female_bins_95_identity___19287
group_10176	COG0107	Imidazole glycerol phosphate synthase subunit HisF (HisF) (PDB:1OX4)	1	1	1	386	5528	386	4880		761	761	761			female_bins_95_identity___19288
COG0118		Imidazoleglycerol phosphate synthase glutamine amidotransferase subunit HisH (HisH) (PDB:1OX4)	1	1	1	386	5529	386	4881		605	605	605			female_bins_95_identity___19289
group_10178			1	1	1	386	5530	386	4882		1697	1697	1697			female_bins_95_identity___19290
group_10179	COG0846	NAD-dependent protein deacetylase	1	1	1	386	5531	386	4883		803	803	803			female_bins_95_identity___19291
group_1018	COG4977	Transcriptional regulator GlxA	1	1	1	14	12	14	53		821	821	821	female_bins_95_identity___14409
group_10180			1	1	1	386	3163	386	4884		761	761	761			female_bins_95_identity___19293
group_10181	COG5002	Sensor histidine kinase WalK (WalK) (PDB:4I5S)	1	1	1	386	3164	386	5265		1514	1514	1514			female_bins_95_identity___19294
group_10182	COG0745	DNA-binding response regulator	1	1	1	386	3165	386	5266		674	674	674			female_bins_95_identity___19295
group_10183			1	1	1	386	3166	386	5267		572	572	572			female_bins_95_identity___19296
COG2198		HPt (histidine-containing phosphotransfer) domain (HPtr) (PDB:3IQT)	1	1	1	386	3167	386	5268		350	350	350			female_bins_95_identity___19297
group_10185	COG0643	Chemotaxis protein histidine kinase CheA (CheA) (PDB:1B3Q)	1	1	1	386	3168	386	5269		2204	2204	2204			female_bins_95_identity___19298
group_10186			1	1	1	386	3169	386	5270		194	194	194			female_bins_95_identity___19299
group_10187			1	1	1	386	3170	386	5271		887	887	887			female_bins_95_identity___19300
group_10188	COG1102	Cytidylate kinase (CmkB)	1	1	1	386	3171	386	5272		797	797	797			female_bins_95_identity___19301
group_10189			1	1	1	386	3172	386	5273		803	803	803			female_bins_95_identity___19302
group_1019			1	1	1	14	13	14	54		203	203	203	female_bins_95_identity___14410
group_10190	COG2333	DNA uptake channel protein ComEC C-terminal domain	1	1	1	386	3173	386	5274		1085	1085	1085			female_bins_95_identity___19303
group_10191	COG0791	Cell wall-associated hydrolase	1	1	1	386	3174	386	5275		1307	1307	1307			female_bins_95_identity___19304
COG0196		FAD synthase (RibF) (PDB:1MRZ)	1	1	1	386	3175	386	5276		968	968	968			female_bins_95_identity___19305
group_10193	COG0130	tRNA U55 pseudouridine synthase TruB	1	1	1	386	3176	386	5277		905	905	905			female_bins_95_identity___19306
group_10194	COG0618	nanoRNase/pAp phosphatase	1	1	1	386	3177	386	5278		995	995	995			female_bins_95_identity___19307
group_10195	COG0858	Ribosome-binding factor RbfA (RbfA) (PDB:1JOS)	1	1	1	386	3178	386	5279		395	395	395			female_bins_95_identity___19308
group_10196	COG1598	Antitoxin component HicB of the HicAB toxin-antitoxin system (HicB) (PDB:4P78) (PUBMED:19060138)	1	1	1	403	1	403	45		386	386	386			female_bins_95_identity___19827
COG1724		Predicted RNA binding protein YcfA	1	1	1	403	2	403	46		182	182	182			female_bins_95_identity___19828
group_10198			1	1	1	403	3	403	47		188	188	188			female_bins_95_identity___19829
group_10199			1	1	1	403	4	403	48		197	197	197			female_bins_95_identity___19830
COG0566		tRNA G18 (ribose-2'-O)-methylase SpoU (SpoU) (PDB:1GZ0)	1	1	1	14	14	14	55		743	743	743	female_bins_95_identity___14411
group_10200	COG4974	Site-specific recombinase XerD (XerD) (PDB:1A0P)	1	1	1	403	5	403	49		203	203	203			female_bins_95_identity___19831
group_10201	COG4974	Site-specific recombinase XerD (XerD) (PDB:1A0P)	1	1	1	403	56	403	50		731	731	731			female_bins_95_identity___19832
group_10202			1	1	1	403	55	403	51		449	449	449			female_bins_95_identity___19833
group_10203			1	1	1	403	54	403	52		761	761	761			female_bins_95_identity___19834
group_10204			1	1	1	403	53	403	53		1175	1175	1175			female_bins_95_identity___19835
group_10205	COG4193	Beta- N-acetylglucosaminidase (LytD) (PDB:6FXO)	1	1	1	403	52	403	54		371	371	371			female_bins_95_identity___19836
group_10206	COG0464	AAA+-type ATPase	1	1	1	403	51	403	55		2075	2075	2075			female_bins_95_identity___19837
group_10207			1	1	1	403	50	403	56		542	542	542			female_bins_95_identity___19838
group_10208	COG2202	PAS domain (PAS) (PDB:2MWG)	1	1	1	403	49	403	44		833	833	833			female_bins_95_identity___19839
group_10209			1	1	1	403	48	403	43		1817	1817	1817			female_bins_95_identity___19840
COG1234		Ribonuclease BN	1	1	1	14	15	14	56		938	938	938	female_bins_95_identity___14412
group_10210			1	1	1	403	47	403	42		839	839	839			female_bins_95_identity___19841
group_10211			1	1	1	403	46	403	41		2666	2666	2666			female_bins_95_identity___19842
group_10212			1	1	1	403	45	403	40		1103	1103	1103			female_bins_95_identity___19843
group_10213			1	1	1	403	44	403	39		2078	2078	2078			female_bins_95_identity___19844
group_10214			1	1	1	403	43	403	38		2660	2660	2660			female_bins_95_identity___19845
group_10215			1	1	1	403	42	403	37		386	386	386			female_bins_95_identity___19846
COG3497		Phage tail sheath protein FI (PDB:3J9Q) (PUBMED:18586829)	1	1	1	403	41	403	36		1688	1688	1688			female_bins_95_identity___19847
group_10217			1	1	1	403	40	403	35		494	494	494			female_bins_95_identity___19848
group_10218			1	1	1	403	39	403	34		362	362	362			female_bins_95_identity___19849
group_10219			1	1	1	403	38	403	33		278	278	278			female_bins_95_identity___19850
group_1022			1	1	1	14	16	14	57		407	407	407	female_bins_95_identity___14413
group_10220			1	1	1	403	37	403	32		476	476	476			female_bins_95_identity___19851
group_10221			1	1	1	403	36	403	31		2969	2969	2969			female_bins_95_identity___19852
group_10222			1	1	1	403	35	403	30		536	536	536			female_bins_95_identity___19853
group_10223			1	1	1	403	34	403	29		626	626	626			female_bins_95_identity___19854
group_10224			1	1	1	403	33	403	28		1157	1157	1157			female_bins_95_identity___19855
group_10225	COG3501	Uncharacterized conserved protein VgrG	1	1	1	403	32	403	27		812	812	812			female_bins_95_identity___19856
COG3628		Phage baseplate assembly protein W (PDB:2IA7)	1	1	1	403	31	403	26		401	401	401			female_bins_95_identity___19857
group_10227			1	1	1	403	30	403	25		2957	2957	2957			female_bins_95_identity___19858
group_10228	COG3299	Uncharacterized phage protein gp47/JayE (JayE)	1	1	1	403	29	403	24		2108	2108	2108			female_bins_95_identity___19859
group_10229			1	1	1	403	28	403	23		1100	1100	1100			female_bins_95_identity___19860
group_1023	COG0492	Thioredoxin reductase (TrxB) (PDB:3FBS)	1	1	1	14	17	14	58		920	920	920	female_bins_95_identity___14414
group_10230			1	1	1	403	27	403	22		581	581	581			female_bins_95_identity___19861
group_10231			1	1	1	403	26	403	21		791	791	791			female_bins_95_identity___19862
COG1957		Inosine-uridine nucleoside N-ribohydrolase (URH1) (PDB:1EZR)	1	1	1	403	25	403	20		1334	1334	1334			female_bins_95_identity___19863
group_10233	COG0036	Pentose-5-phosphate-3-epimerase (Rpe) (PDB:1H1Y)	1	1	1	403	24	403	19		668	668	668			female_bins_95_identity___19864
group_10234			1	1	1	403	23	403	18		3638	3638	3638			female_bins_95_identity___19865
group_10235			1	1	1	403	22	403	17		1349	1349	1349			female_bins_95_identity___19866
group_10236			1	1	1	403	21	403	16		833	833	833			female_bins_95_identity___19867
group_10237			1	1	1	403	20	403	15		1187	1187	1187			female_bins_95_identity___19868
group_10238	COG0152	Phosphoribosylaminoimidazole-succinocarboxamide synthase (PurC) (PDB:1A48)	1	1	1	403	19	403	14		872	872	872			female_bins_95_identity___19869
group_10239	COG0034	Glutamine phosphoribosylpyrophosphate amidotransferase (PurF) (PDB:1ECB)	1	1	1	403	18	403	13		1448	1448	1448			female_bins_95_identity___19870
group_1024			1	1	1	14	18	14	59		1013	1013	1013	female_bins_95_identity___14415
COG0015		Adenylosuccinate lyase (PurB) (PDB:2HVG)	1	1	1	403	17	403	12		1451	1451	1451			female_bins_95_identity___19871
group_10241	COG0104	Adenylosuccinate synthase (PurA) (PDB:1ADE)	1	1	1	403	16	403	11		1292	1292	1292			female_bins_95_identity___19872
group_10242	COG1203	CRISPR-Cas type I system-associated endonuclease/helicase Cas3 (Cas3)	1	1	1	403	15	403	10		2783	2783	2783			female_bins_95_identity___19873
COG5942		CRISPR-Cas system type I-E effector complex large subunit Cas8e (Cas8e)	1	1	1	403	14	403	9		1637	1637	1637			female_bins_95_identity___19874
COG5949		CRISPR-Cas system type I-E effector complex small subunit Cse2 (Cse2gr11)	1	1	1	403	13	403	8		602	602	602			female_bins_95_identity___19875
COG5934		CRISPR-Cas system endoribonuclease Cas6e	1	1	1	403	12	403	7		1094	1094	1094			female_bins_95_identity___19876
COG1688		CRISPR/Cas system-associated protein Cas5	1	1	1	403	11	403	6		740	740	740			female_bins_95_identity___19877
COG5551		CRISPR/Cas system endoribonuclease Cas6	1	1	1	403	10	403	5		629	629	629			female_bins_95_identity___19878
COG1518		CRISPR-Cas system-associated integrase Cas1 (Cas1) (PDB:2YZS)	1	1	1	403	9	403	4		947	947	947			female_bins_95_identity___19879
COG2176		DNA polymerase III	1	1	1	403	8	403	3		875	875	875			female_bins_95_identity___19880
group_1025			1	1	1	14	19	14	60		854	854	854	female_bins_95_identity___14416
group_10250	COG1192	ParA-like ATPase involved in chromosome/plasmid partitioning or cellulose biosynthesis protein BcsQ (ParA) (PDB:6NOO)	1	1	1	403	7	403	2		365	365	365			female_bins_95_identity___19881
group_10251	COG3415	CRISPR-associated protein Csa3	1	1	1	403	6	403	1		1274	1274	1274			female_bins_95_identity___19882
group_10252			1	1	1	387	75	387	170		107	107	107				female_bins_95_identity___206
COG2274		ABC-type bacteriocin/lantibiotic exporters	1	1	1	387	76	387	171		1787	1787	1787				female_bins_95_identity___207
group_10254	COG1132	ABC-type multidrug transport system	1	1	1	387	77	387	172		1790	1790	1790				female_bins_95_identity___208
group_10255	COG3119	Arylsulfatase A or related enzyme	1	1	1	387	78	387	173		1658	1658	1658				female_bins_95_identity___209
group_10256			1	1	1	387	79	387	174		1013	1013	1013				female_bins_95_identity___210
group_10257	COG0714	MoxR-like ATPase (MoxR) (PDB:2R44)	1	1	1	387	80	387	175		1532	1532	1532				female_bins_95_identity___211
group_10258	COG3864	Predicted metal-dependent peptidase	1	1	1	387	81	387	176		1283	1283	1283				female_bins_95_identity___212
group_10259	COG1292	Choline-glycine betaine transporter (BetT) (PDB:2WIT)	1	1	1	387	82	387	177		1559	1559	1559				female_bins_95_identity___213
group_1026	COG1044	UDP-3-O-[3-hydroxymyristoyl] glucosamine N-acyltransferase (LpxD) (PDB:6P83)	1	1	1	14	20	14	61		1736	1736	1736	female_bins_95_identity___14417
COG4750		CTP:phosphocholine cytidylyltransferase LicC (LicC) (PDB:1JYK)	1	1	1	387	83	387	178		881	881	881				female_bins_95_identity___214
group_10261	COG0510	Thiamine kinase or a related kinase (CotS) (PDB:3DXQ)	1	1	1	387	84	387	179		1772	1772	1772				female_bins_95_identity___215
group_10262	COG0706	Membrane protein insertase Oxa1/YidC/SpoIIIJ (YidC) (PDB:3WO6)	1	1	1	387	85	387	180		2069	2069	2069				female_bins_95_identity___216
group_10263			1	1	1	387	86	387	181		269	269	269				female_bins_95_identity___217
group_10264	COG0491	Glyoxylase or a related metal-dependent hydrolase	1	1	1	387	87	387	182		632	632	632				female_bins_95_identity___218
group_10265	COG0317	(p)ppGpp synthase/hydrolase	1	1	1	387	88	387	183		2333	2333	2333				female_bins_95_identity___219
group_10266	COG0459	Chaperonin GroEL (HSP60 family) (GroEL) (PDB:1AON)	1	1	1	387	89	387	184		1625	1625	1625				female_bins_95_identity___220
group_10267	COG0234	Co-chaperonin GroES (HSP10) (GroES)	1	1	1	387	90	387	185		284	284	284				female_bins_95_identity___221
COG2202		PAS domain (PAS) (PDB:2MWG)	1	1	1	387	91	387	186		926	926	926				female_bins_95_identity___222
COG1595		DNA-directed RNA polymerase specialized sigma subunit	1	1	1	387	92	387	187		89	89	89				female_bins_95_identity___223
group_1027	COG0515	Serine/threonine protein kinase (SPS1) (PDB:6G4J)	1	1	1	14	21	14	62		1127	1127	1127	female_bins_95_identity___14418
group_10270			1	1	1	387	93	387	188		725	725	725				female_bins_95_identity___224
group_10271	COG3506	Regulation of enolase protein 1 (function unknown)	1	1	1	387	94	387	189		599	599	599				female_bins_95_identity___225
group_10272			1	1	1	387	95	387	190		227	227	227				female_bins_95_identity___226
group_10273	COG0738	Fucose permease (FucP) (PDB:3O7P)	1	1	1	387	96	387	191		1187	1187	1187				female_bins_95_identity___227
group_10274	COG1917	Cupin domain protein related to quercetin dioxygenase (QdoI) (PDB:2H0V)	1	1	1	387	97	387	192		896	896	896				female_bins_95_identity___228
group_10275	COG2131	Deoxycytidylate deaminase (ComEB) (PDB:2HVV) (PUBMED:25746996	1	1	1	387	98	387	193		497	497	497				female_bins_95_identity___229
group_10276	COG1695	DNA-binding transcriptional regulator	1	1	1	387	99	387	194		368	368	368				female_bins_95_identity___230
group_10277			1	1	1	387	100	387	195		131	131	131				female_bins_95_identity___231
group_10278	COG0640	DNA-binding transcriptional regulator	1	1	1	387	101	387	196		269	269	269				female_bins_95_identity___232
COG5658		Bacterial immunity/signal transduction membrane protein SdpI	1	1	1	387	102	387	197		656	656	656				female_bins_95_identity___233
group_1028	COG1047	Peptidyl-prolyl cis-trans isomerase	1	1	1	14	22	14	63		530	530	530	female_bins_95_identity___14419
group_10280			1	1	1	387	103	387	198		461	461	461				female_bins_95_identity___234
group_10281	COG0642	Signal transduction histidine kinase (BaeS) (PDB:1JOY)	1	1	1	387	104	387	199		1211	1211	1211				female_bins_95_identity___235
group_10282	COG2177	Cell division protein FtsX (FtsX)	1	1	1	387	106	387	208		1739	1739	1739				female_bins_95_identity___238
group_10283			1	1	1	99	1	99	1		683	683	683				female_bins_95_identity___809
group_10284			1	1	1	99	2	99	2		833	833	833				female_bins_95_identity___810
group_10285	COG0542	ATP-dependent Clp protease	1	1	1	99	3	99	3		2585	2585	2585				female_bins_95_identity___811
COG1619		Muramoyltetrapeptide carboxypeptidase LdcA (peptidoglycan recycling) (LdcA) (PDB:3TLZ)	1	1	1	99	4	99	4		1022	1022	1022				female_bins_95_identity___812
group_10287			1	1	1	99	5	99	5		173	173	173				female_bins_95_identity___813
COG3894		Uncharacterized 2Fe-2S and 4Fe-4S clusters-containing protein	1	1	1	99	6	99	6		1688	1688	1688				female_bins_95_identity___814
group_10289	COG5523	Uncharacterized membrane protein	1	1	1	99	7	99	7		917	917	917				female_bins_95_identity___815
COG0403		Glycine cleavage system protein P (pyridoxal-binding)	1	1	1	14	23	14	64		2831	2831	2831	female_bins_95_identity___14420
group_10290	COG0745	DNA-binding response regulator	1	1	1	99	8	99	8		710	710	710				female_bins_95_identity___816
group_10291	COG5002	Sensor histidine kinase WalK (WalK) (PDB:4I5S)	1	1	1	99	9	99	9		1181	1181	1181				female_bins_95_identity___817
group_10292	COG0726	Peptidoglycan/xylan/chitin deacetylase	1	1	1	99	10	99	10		734	734	734				female_bins_95_identity___818
group_10293	COG2207	AraC-type DNA-binding domain and AraC-containing proteins (AraC) (PDB:1BL0)	1	1	1	99	11	99	32		935	935	935				female_bins_95_identity___819
group_10294	COG0110	Acetyltransferase	1	1	1	99	12	99	31		659	659	659				female_bins_95_identity___820
group_10295	COG1387	Histidinol phosphatase or related hydrolase of the PHP family (HIS2) (PDB:1M65)	1	1	1	99	13	99	30		830	830	830				female_bins_95_identity___821
group_10296			1	1	1	99	14	99	29		728	728	728				female_bins_95_identity___822
group_10297	COG3973	DNA helicase IV (HelD)	1	1	1	99	15	99	28		2183	2183	2183				female_bins_95_identity___823
group_10298	COG1957	Inosine-uridine nucleoside N-ribohydrolase (URH1) (PDB:1EZR)	1	1	1	99	16	99	27		1286	1286	1286				female_bins_95_identity___824
group_10299	COG0778	Nitroreductase (NfnB) (PDB:1F5V)	1	1	1	99	17	99	26		590	590	590				female_bins_95_identity___825
group_1030	COG0441	Threonyl-tRNA synthetase (ThrS) (PDB:1NYQ)	1	1	1	14	24	14	65		1673	1673	1673	female_bins_95_identity___14421
COG5628		Predicted acetyltransferase	1	1	1	99	32	99	25		491	491	491				female_bins_95_identity___826
group_10301			1	1	1	99	31	99	24		509	509	509				female_bins_95_identity___827
group_10302	COG1396	Transcriptional regulator	1	1	1	99	30	99	23		539	539	539				female_bins_95_identity___828
group_10303			1	1	1	99	29	99	22		395	395	395				female_bins_95_identity___829
group_10304	COG1309	DNA-binding protein	1	1	1	99	28	99	21		572	572	572				female_bins_95_identity___830
group_10305	COG1266	Membrane protease YdiL	1	1	1	99	27	99	20		770	770	770				female_bins_95_identity___831
group_10306			1	1	1	99	26	99	19		470	470	470				female_bins_95_identity___832
group_10307	COG3279	DNA-binding response regulator	1	1	1	99	25	99	18		440	440	440				female_bins_95_identity___833
group_10308			1	1	1	99	24	99	17		368	368	368				female_bins_95_identity___834
group_10309	COG0535	Radical SAM superfamily maturase	1	1	1	99	23	99	16		767	767	767				female_bins_95_identity___835
COG0737		2'	1	1	1	14	25	14	66		1445	1445	1445	female_bins_95_identity___14422
group_10310	COG1396	Transcriptional regulator	1	1	1	99	22	99	15		854	854	854				female_bins_95_identity___836
group_10311	COG0152	Phosphoribosylaminoimidazole-succinocarboxamide synthase (PurC) (PDB:1A48)	1	1	1	99	21	99	14		848	848	848				female_bins_95_identity___837
group_10312	COG0110	Acetyltransferase	1	1	1	99	20	99	13		584	584	584				female_bins_95_identity___838
group_10313	COG2602	Beta-lactamase class D (YbxI) (PDB:5CTN)	1	1	1	99	19	99	12		923	923	923				female_bins_95_identity___839
group_10314			1	1	1	99	18	99	11		119	119	119				female_bins_95_identity___840
group_10315	COG2207	AraC-type DNA-binding domain and AraC-containing proteins (AraC) (PDB:1BL0)	1	1	1	129	10	128	11		122	122	122				female_bins_95_identity___1372
group_10316	COG1186	Protein chain release factor PrfB (PrfB) (PDB:1GQE)	1	1	1	129	11	128	12		590	590	590				female_bins_95_identity___1373
group_10317	COG1690	RNA-splicing ligase RtcB	1	1	1	129	12	128	13		1175	1175	1175				female_bins_95_identity___1374
group_10318	COG1162	Ribosome biogenesis GTPase RsgA (RsgA) (PDB:1T9H)	1	1	1	129	13	128	14		878	878	878				female_bins_95_identity___1375
group_10319	COG0515	Serine/threonine protein kinase (SPS1) (PDB:6G4J)	1	1	1	129	14	128	15		2132	2132	2132				female_bins_95_identity___1376
group_1032	COG0563	Adenylate kinase or related kinase (Adk) (PDB:1AK2)	1	1	1	14	26	14	67		587	587	587	female_bins_95_identity___14423
group_10320	COG0631	Serine/threonine protein phosphatase PrpC (PTC1) (PDB:6IHL)	1	1	1	129	15	128	16		746	746	746				female_bins_95_identity___1377
group_10321	COG0820	Adenine C2-methylase RlmN of 23S rRNA A2503 and tRNA A37 (RlmN) (PDB:3RFA)	1	1	1	129	16	128	17		1067	1067	1067				female_bins_95_identity___1378
group_10322	COG0144	16S rRNA C967 or C1407 C5-methylase	1	1	1	129	17	128	18		1385	1385	1385				female_bins_95_identity___1379
group_10323	COG2738	Zn-dependent membrane protease YugP (YugP)	1	1	1	129	18	128	19		719	719	719				female_bins_95_identity___1380
COG0223		Methionyl-tRNA formyltransferase (Fmt) (PDB:1FMT)	1	1	1	129	19	128	20		953	953	953				female_bins_95_identity___1381
group_10325	COG0242	Peptide deformylase (Def) (PDB:1BS4)	1	1	1	129	20	128	21		479	479	479				female_bins_95_identity___1382
COG1198		Primosomal protein N' (replication factor Y) - superfamily II helicase (PriA) (PDB:6DCR)	1	1	1	129	21	128	22		2273	2273	2273				female_bins_95_identity___1383
group_10327	COG0769	UDP-N-acetylmuramyl tripeptide synthase (MurE) (PDB:1E8C)	1	1	1	129	22	128	23		1466	1466	1466				female_bins_95_identity___1384
group_10328	COG1105	1-phosphofructokinase or 6-phosphofructokinase II (FruK) (PDB:2ABQ)	1	1	1	129	23	128	10		932	932	932				female_bins_95_identity___1385
group_10329	COG0608	ssDNA-specific exonuclease RecJ	1	1	1	129	9	128	9		1871	1871	1871				female_bins_95_identity___1386
group_1033	COG0611	Thiamine monophosphate kinase (ThiL) (PDB:5CC8)	1	1	1	14	27	14	68		1136	1136	1136	female_bins_95_identity___14424
group_10330	COG0691	tmRNA-binding protein (SmpB) (PDB:1J1H) (PUBMED:26251518)	1	1	1	129	8	128	8		476	476	476				female_bins_95_identity___1387
group_10331	COG0557	Exoribonuclease R (VacB) (PDB:6H25)	1	1	1	129	7	128	7		2144	2144	2144				female_bins_95_identity___1388
COG1314		Protein translocase subunit SecG (SecG) (PDB:2AKH)	1	1	1	129	6	128	6		239	239	239				female_bins_95_identity___1389
group_10333	COG0517	CBS domain (CBS) (PDB:1B3O)	1	1	1	129	5	128	5		1961	1961	1961				female_bins_95_identity___1390
group_10334	COG1266	Membrane protease YdiL	1	1	1	129	4	128	4		545	545	545				female_bins_95_identity___1391
group_10335			1	1	1	129	3	128	3		752	752	752				female_bins_95_identity___1392
group_10336	COG1670	Protein N-acetyltransferase	1	1	1	129	2	128	2		554	554	554				female_bins_95_identity___1393
group_10337			1	1	1	129	1	128	1		71	71	71				female_bins_95_identity___1394
group_10338			1	1	1	133	1	130	1		356	356	356				female_bins_95_identity___1865
group_10339	COG4227	Antirestriction protein ArdC (ArdC) (PUBMED:10686096)	1	1	1	133	2	130	2		1052	1052	1052				female_bins_95_identity___1866
group_1034	COG0360	Ribosomal protein S6 (RpsF) (PDB:4V4H)	1	1	1	14	28	14	69		344	344	344	female_bins_95_identity___14425
group_10340	COG2265	tRNA/tmRNA/rRNA uracil-C5-methylase	1	1	1	133	3	130	3		1742	1742	1742				female_bins_95_identity___1867
group_10341	COG3481	3'-5' exoribonuclease YhaM	1	1	1	133	4	130	4		944	944	944				female_bins_95_identity___1868
group_10342	COG0265	Periplasmic serine protease	1	1	1	133	5	130	5		1451	1451	1451				female_bins_95_identity___1869
group_10343	COG1193	dsDNA-specific endonuclease/ATPase MutS2 (MutS2)	1	1	1	133	6	130	6		2378	2378	2378				female_bins_95_identity___1870
group_10344	COG0745	DNA-binding response regulator	1	1	1	133	7	130	7		755	755	755				female_bins_95_identity___1871
group_10345	COG0642	Signal transduction histidine kinase (BaeS) (PDB:1JOY)	1	1	1	133	8	130	8		1412	1412	1412				female_bins_95_identity___1872
group_10346	COG0219	tRNA(Leu) C34 or U34 (ribose-2'-O)-methylase TrmL	1	1	1	133	9	130	9		557	557	557				female_bins_95_identity___1873
group_10347	COG0436	Aspartate/methionine/tyrosine aminotransferase (AspB) (PDB:2O0R)	1	1	1	133	10	130	10		1172	1172	1172				female_bins_95_identity___1874
group_10348	COG1522	DNA-binding transcriptional regulator	1	1	1	133	11	130	11		482	482	482				female_bins_95_identity___1875
group_10349	COG0309	Carbamoyl dehydratase HypE (hydrogenase maturation factor) (HypE) (PDB:2I6R) (PUBMED:28618091)	1	1	1	133	12	130	12		1028	1028	1028				female_bins_95_identity___1876
group_1035	COG0238	Ribosomal protein S18 (RpsR) (PDB:4V4H)	1	1	1	14	29	14	70		281	281	281	female_bins_95_identity___14426
group_10350	COG2720	Vancomycin resistance protein YoaR (function unknown)	1	1	1	133	13	130	13		1550	1550	1550				female_bins_95_identity___1877
group_10351			1	1	1	133	14	130	14		608	608	608				female_bins_95_identity___1878
group_10352	COG0847	DNA polymerase III	1	1	1	133	15	130	15		701	701	701				female_bins_95_identity___1879
group_10353	COG0177	Endonuclease III (Nth) (PDB:4UOB)	1	1	1	133	16	130	16		656	656	656				female_bins_95_identity___1880
group_10354	COG1032	Radical SAM superfamily enzyme YgiQ	1	1	1	133	22	130	17		1784	1784	1784				female_bins_95_identity___1881
group_10355	COG1396	Transcriptional regulator	1	1	1	133	21	130	18		347	347	347				female_bins_95_identity___1882
group_10356	COG4468	Galactose-1-phosphate uridylyltransferase (GalT2)	1	1	1	133	20	130	19		1553	1553	1553				female_bins_95_identity___1883
group_10357	COG0153	Galactokinase (GalK) (PDB:1PIE)	1	1	1	133	19	130	20		1163	1163	1163				female_bins_95_identity___1884
group_10358	COG2207	AraC-type DNA-binding domain and AraC-containing proteins (AraC) (PDB:1BL0)	1	1	1	133	18	130	21		902	902	902				female_bins_95_identity___1885
group_10359			1	1	1	133	17	130	22		329	329	329				female_bins_95_identity___1886
group_1036	COG0359	Ribosomal protein L9 (RplI) (PDB:1VS6) (PUBMED:27112601)	1	1	1	14	30	14	71		443	443	443	female_bins_95_identity___14427
group_10360	COG0655	Multimeric flavodoxin WrbA	1	1	1	118	19	117	2		689	689	689				female_bins_95_identity___2390
group_10361	COG1472	Periplasmic beta-glucosidase and related glycosidases (BglX) (PDB:2X40)	1	1	1	118	20	117	3		1637	1637	1637				female_bins_95_identity___2391
group_10362	COG1139	L-lactate utilization protein LutB	1	1	1	118	21	117	4		635	635	635				female_bins_95_identity___2392
group_10363			1	1	1	118	22	117	5		359	359	359				female_bins_95_identity___2393
group_10364	COG0266	Formamidopyrimidine-DNA glycosylase (Nei) (PDB:1EE8)	1	1	1	118	23	117	6		830	830	830				female_bins_95_identity___2394
group_10365	COG1533	DNA repair photolyase (SplB)	1	1	1	118	24	117	7		890	890	890				female_bins_95_identity___2395
group_10366	COG0778	Nitroreductase (NfnB) (PDB:1F5V)	1	1	1	118	25	117	8		626	626	626				female_bins_95_identity___2396
group_10367	COG1846	DNA-binding transcriptional regulator	1	1	1	118	26	117	9		473	473	473				female_bins_95_identity___2397
group_10368			1	1	1	118	17	117	10		221	221	221				female_bins_95_identity___2398
group_10369	COG0840	Methyl-accepting chemotaxis protein (MCP) (Tar) (PDB:1QU7)	1	1	1	118	16	117	11		1958	1958	1958				female_bins_95_identity___2399
group_1037	COG1022	Long-chain acyl-CoA synthetase (AMP-forming) (FAA1)	1	1	1	14	31	14	72		1676	1676	1676	female_bins_95_identity___14428
group_10370	COG0527	Aspartate kinase (MetL1) (PDB:2CDQ)	1	1	1	118	15	117	12		1319	1319	1319				female_bins_95_identity___2400
COG3635		2	1	1	1	118	14	117	13		1208	1208	1208				female_bins_95_identity___2401
COG0460		Homoserine dehydrogenase (ThrA) (PDB:5AVO) (PUBMED:29124164)	1	1	1	118	13	117	14		1205	1205	1205				female_bins_95_identity___2402
group_10373	COG0112	Glycine/serine hydroxymethyltransferase (GlyA) (PDB:1BJ4)	1	1	1	118	12	117	15		1238	1238	1238				female_bins_95_identity___2403
group_10374	COG1597	Phosphatidylglycerol kinase	1	1	1	118	11	117	26		1001	1001	1001				female_bins_95_identity___2404
group_10375			1	1	1	118	10	117	25		677	677	677				female_bins_95_identity___2405
group_10376	COG0463	Glycosyltransferase involved in cell wall bisynthesis (WcaA) (PDB:5MLZ)	1	1	1	118	9	117	24		1025	1025	1025				female_bins_95_identity___2406
COG1194		Adenine-specific DNA glycosylase	1	1	1	118	8	117	23		1097	1097	1097				female_bins_95_identity___2407
group_10378			1	1	1	118	7	117	22		926	926	926				female_bins_95_identity___2408
group_10379	COG4728	Uncharacterized conserved protein	1	1	1	118	6	117	21		596	596	596				female_bins_95_identity___2409
group_1038	COG1600	Epoxyqueuosine reductase QueG (queuosine biosynthesis) (QueG) (PDB:5D08) (PUBMED:2150253)	1	1	1	14	32	14	73		938	938	938	female_bins_95_identity___14429
group_10380			1	1	1	118	5	117	20		380	380	380				female_bins_95_identity___2410
group_10381			1	1	1	118	4	117	19		119	119	119				female_bins_95_identity___2411
group_10382			1	1	1	118	3	117	18		1394	1394	1394				female_bins_95_identity___2412
group_10383	COG0740	ATP-dependent protease ClpP	1	1	1	118	2	117	17		593	593	593				female_bins_95_identity___2413
group_10384	COG2207	AraC-type DNA-binding domain and AraC-containing proteins (AraC) (PDB:1BL0)	1	1	1	118	1	117	16		440	440	440				female_bins_95_identity___2414
group_10385			1	1	1	127	1	127	1		281	281	281				female_bins_95_identity___2849
group_10386			1	1	1	127	2	127	2		635	635	635				female_bins_95_identity___2850
group_10387	COG0143	Methionyl-tRNA synthetase (MetG) (PDB:1A8H)	1	1	1	127	3	127	3		1622	1622	1622				female_bins_95_identity___2851
group_10388			1	1	1	127	4	127	4		206	206	206				female_bins_95_identity___2852
group_10389			1	1	1	127	5	127	5		1121	1121	1121				female_bins_95_identity___2853
group_1039			1	1	1	14	33	14	74		1208	1208	1208	female_bins_95_identity___14430
group_10390	COG2378	Predicted DNA-binding transcriptional regulator YobV	1	1	1	127	6	127	24		932	932	932				female_bins_95_identity___2854
group_10391			1	1	1	127	7	127	23		347	347	347				female_bins_95_identity___2855
group_10392	COG1957	Inosine-uridine nucleoside N-ribohydrolase (URH1) (PDB:1EZR)	1	1	1	127	8	127	22		935	935	935				female_bins_95_identity___2856
group_10393	COG1122	Energy-coupling factor transporter ATP-binding protein EcfA2 (EcfA2) (PDB:4HUQ)	1	1	1	127	9	127	21		272	272	272				female_bins_95_identity___2857
COG1122		Energy-coupling factor transporter ATP-binding protein EcfA2 (EcfA2) (PDB:4HUQ)	1	1	1	127	24	127	20		524	524	524				female_bins_95_identity___2858
group_10395	COG1122	Energy-coupling factor transporter ATP-binding protein EcfA2 (EcfA2) (PDB:4HUQ)	1	1	1	127	23	127	19		848	848	848				female_bins_95_identity___2859
COG0619		ECF-type transporter transmembrane protein EcfT (EcfT) (PDB:4HZU)	1	1	1	127	22	127	18		812	812	812				female_bins_95_identity___2860
COG2206		HD-GYP domain	1	1	1	127	21	127	17		620	620	620				female_bins_95_identity___2861
group_10398	COG0524	Sugar or nucleoside kinase	1	1	1	127	20	127	16		905	905	905				female_bins_95_identity___2862
group_10399	COG0524	Sugar or nucleoside kinase	1	1	1	127	19	127	15		1919	1919	1919				female_bins_95_identity___2863
COG0404		Glycine cleavage system protein T (aminomethyltransferase) (GcvT) (PDB:2GAH) (PUBMED:25433025	1	1	1	14	34	14	75		1100	1100	1100	female_bins_95_identity___14431
group_10400			1	1	1	127	18	127	14		374	374	374				female_bins_95_identity___2864
group_10401	COG1266	Membrane protease YdiL	1	1	1	127	17	127	13		863	863	863				female_bins_95_identity___2865
group_10402			1	1	1	127	16	127	12		950	950	950				female_bins_95_identity___2866
group_10403			1	1	1	127	15	127	11		410	410	410				female_bins_95_identity___2867
group_10404			1	1	1	127	14	127	10		611	611	611				female_bins_95_identity___2868
group_10405			1	1	1	127	13	127	9		422	422	422				female_bins_95_identity___2869
group_10406	COG1595	DNA-directed RNA polymerase specialized sigma subunit	1	1	1	127	12	127	8		446	446	446				female_bins_95_identity___2870
group_10407			1	1	1	127	11	127	7		836	836	836				female_bins_95_identity___2871
group_10408			1	1	1	127	10	127	6		563	563	563				female_bins_95_identity___2872
group_10409	COG0745	DNA-binding response regulator	1	1	1	267	2	267	7		704	704	704				female_bins_95_identity___3309
COG3176		Putative hemolysin	1	1	1	14	35	14	76		992	992	992	female_bins_95_identity___14432
group_10410	COG0642	Signal transduction histidine kinase (BaeS) (PDB:1JOY)	1	1	1	267	3	267	6		1127	1127	1127				female_bins_95_identity___3310
group_10411	COG1876	LD-carboxypeptidase LdcB	1	1	1	267	4	267	5		749	749	749				female_bins_95_identity___3311
group_10412	COG1653	ABC-type glycerol-3-phosphate transport system	1	1	1	267	5	267	4		2321	2321	2321				female_bins_95_identity___3312
group_10413	COG0673	Predicted dehydrogenase (MviM) (PDB:3UUW)	1	1	1	267	6	267	3		935	935	935				female_bins_95_identity___3313
group_10414	COG2207	AraC-type DNA-binding domain and AraC-containing proteins (AraC) (PDB:1BL0)	1	1	1	267	7	267	2		908	908	908				female_bins_95_identity___3314
group_10415			1	1	1	267	1	267	1		380	380	380				female_bins_95_identity___3315
group_10416	COG0662	Mannose-6-phosphate isomerase	1	1	1	299	1	300	1		302	302	302				female_bins_95_identity___3763
group_10417			1	1	1	299	5	300	2		1679	1679	1679				female_bins_95_identity___3764
group_10418	COG2378	Predicted DNA-binding transcriptional regulator YobV	1	1	1	299	4	300	3		995	995	995				female_bins_95_identity___3765
group_10419	COG2378	Predicted DNA-binding transcriptional regulator YobV	1	1	1	299	3	300	5		1271	1271	1271				female_bins_95_identity___3766
group_1042	COG3176	Putative hemolysin	1	1	1	14	36	14	77		842	842	842	female_bins_95_identity___14433
group_10420	COG1690	RNA-splicing ligase RtcB	1	1	1	299	2	300	4		1232	1232	1232				female_bins_95_identity___3767
group_10421	COG1609	DNA-binding transcriptional regulator	1	1	1	321	4	318	4		1013	1013	1013				female_bins_95_identity___4146
group_10422			1	1	1	321	3	318	3		503	503	503				female_bins_95_identity___4147
group_10423			1	1	1	321	2	318	2		290	290	290				female_bins_95_identity___4148
group_10424	COG1246	N-acetylglutamate synthase or related acetyltransferase	1	1	1	321	1	318	1		458	458	458				female_bins_95_identity___4149
group_10425			1	1	1	379	2	366	1	Investigate	746	746	746				female_bins_95_identity___4527
group_10426	COG2972	Sensor histidine kinase YesM (YesM)	1	1	1	379	1	366	2	Investigate	605	605	605				female_bins_95_identity___4528
group_10427	COG3943	Uncharacterized protein RhuM	1	1	1	386	1046	386	288		227	227	227				female_bins_95_identity___4868
group_10428	COG1961	Site-specific DNA recombinase SpoIVCA/DNA invertase PinE (SpoIVCA) (PDB:1GDT)	1	1	1	386	1047	386	289		215	215	215				female_bins_95_identity___4869
group_10429	COG1961	Site-specific DNA recombinase SpoIVCA/DNA invertase PinE (SpoIVCA) (PDB:1GDT)	1	1	1	386	1048	386	290		203	203	203				female_bins_95_identity___4870
COG0275		16S rRNA C1402 N4-methylase RsmH (RmsH) (PDB:1M6Y)	1	1	1	14	37	14	78		917	917	917	female_bins_95_identity___14434
group_10430	COG3279	DNA-binding response regulator	1	1	1	386	1049	386	291		713	713	713				female_bins_95_identity___4871
group_10431	COG3290	Sensor histidine kinase DipB regulating citrate/malate metabolism (CitA)	1	1	1	386	1050	386	292		1295	1295	1295				female_bins_95_identity___4872
group_10432	COG1136	ABC-type lipoprotein export system	1	1	1	386	1051	386	293		665	665	665				female_bins_95_identity___4873
group_10433	COG4591	ABC-type transport system involved in lipoprotein release	1	1	1	386	1052	386	294		2411	2411	2411				female_bins_95_identity___4874
group_10434			1	1	1	386	1053	386	295		404	404	404				female_bins_95_identity___4875
group_10435	COG3290	Sensor histidine kinase DipB regulating citrate/malate metabolism (CitA)	1	1	1	386	1054	386	296		1331	1331	1331				female_bins_95_identity___4876
group_10436	COG3279	DNA-binding response regulator	1	1	1	386	1055	386	297		701	701	701				female_bins_95_identity___4877
group_10437			1	1	1	386	1056	386	298		917	917	917				female_bins_95_identity___4878
group_10438			1	1	1	386	1057	386	299		677	677	677				female_bins_95_identity___4879
group_10439	COG1835	Peptidoglycan/LPS O-acetylase OafA/YrhL	1	1	1	386	1058	386	300		1127	1127	1127				female_bins_95_identity___4880
group_1044			1	1	1	14	38	14	79		518	518	518	female_bins_95_identity___14435
group_10440	COG1393	Arsenate reductase or related protein	1	1	1	386	1059	386	301		356	356	356				female_bins_95_identity___4881
group_10441	COG1396	Transcriptional regulator	1	1	1	386	1060	386	302		452	452	452				female_bins_95_identity___4882
group_10442			1	1	1	386	1061	386	303		221	221	221				female_bins_95_identity___4883
group_10443	COG1715	Restriction endonuclease Mrr (Mrr)	1	1	1	386	1062	386	304		728	728	728				female_bins_95_identity___4884
group_10444	COG0456	Ribosomal protein S18 acetylase RimI and related acetyltransferases (RimI) (PDB:1GHE)	1	1	1	386	1063	386	305		440	440	440				female_bins_95_identity___4885
group_10445			1	1	1	386	1064	386	306		1403	1403	1403				female_bins_95_identity___4886
group_10446			1	1	1	386	1065	386	307		962	962	962				female_bins_95_identity___4887
group_10447	COG2602	Beta-lactamase class D (YbxI) (PDB:5CTN)	1	1	1	386	1066	386	308		1853	1853	1853				female_bins_95_identity___4888
group_10448	COG3682	Transcriptional regulator	1	1	1	386	1067	386	309		386	386	386				female_bins_95_identity___4889
group_10449	COG4974	Site-specific recombinase XerD (XerD) (PDB:1A0P)	1	1	1	386	1068	386	310		821	821	821				female_bins_95_identity___4890
group_1045	COG0768	Cell division protein FtsI	1	1	1	14	39	14	80		2258	2258	2258	female_bins_95_identity___14436
group_10450	COG5632	N-acetylmuramoyl-L-alanine amidase CwlA (CwlA)	1	1	1	386	1069	386	311		1307	1307	1307				female_bins_95_identity___4891
group_10451			1	1	1	386	1070	386	312		869	869	869				female_bins_95_identity___4892
group_10452			1	1	1	386	1071	386	313		326	326	326				female_bins_95_identity___4893
group_10453			1	1	1	386	1072	386	314		1109	1109	1109				female_bins_95_identity___4894
group_10454			1	1	1	386	1073	386	315		284	284	284				female_bins_95_identity___4895
COG1366		Anti-anti-sigma regulatory factor (antagonist of anti-sigma factor) (SpoIIAA) (PDB:1AUZ)	1	1	1	386	1074	386	316		305	305	305				female_bins_95_identity___4896
group_10456	COG2208	Phosphoserine phosphatase RsbU	1	1	1	386	1075	386	317		2732	2732	2732				female_bins_95_identity___4897
group_10457			1	1	1	386	1076	386	318		455	455	455				female_bins_95_identity___4898
group_10458	COG0174	Glutamine synthetase (GlnA) (PDB:1F1H)	1	1	1	386	1077	386	319		1436	1436	1436				female_bins_95_identity___4899
group_10459			1	1	1	386	1078	386	320		1526	1526	1526				female_bins_95_identity___4900
group_1046	COG0769	UDP-N-acetylmuramyl tripeptide synthase (MurE) (PDB:1E8C)	1	1	1	14	40	14	81		1460	1460	1460	female_bins_95_identity___14437
COG0347		Nitrogen regulatory protein PII (GlnK) (PDB:2GW8) (PUBMED:24610711)	1	1	1	386	1079	386	321		695	695	695				female_bins_95_identity___4901
group_10461	COG1835	Peptidoglycan/LPS O-acetylase OafA/YrhL	1	1	1	386	1080	386	322		1037	1037	1037				female_bins_95_identity___4902
group_10462			1	1	1	386	1081	386	323		203	203	203				female_bins_95_identity___4903
group_10463	COG1472	Periplasmic beta-glucosidase and related glycosidases (BglX) (PDB:2X40)	1	1	1	386	1082	386	324		2276	2276	2276				female_bins_95_identity___4904
group_10464			1	1	1	386	1083	386	325		1070	1070	1070				female_bins_95_identity___4905
COG0504		CTP synthase (UTP-ammonia lyase) (PyrG) (PDB:1S1M)	1	1	1	386	1084	386	326		1604	1604	1604				female_bins_95_identity___4906
group_10466	COG0465	ATP-dependent Zn proteases (HflB) (PDB:1LV7)	1	1	1	386	1085	386	327		2288	2288	2288				female_bins_95_identity___4907
group_10467	COG2972	Sensor histidine kinase YesM (YesM)	1	1	1	386	1086	386	328		1763	1763	1763				female_bins_95_identity___4908
group_10468	COG4753	Two-component response regulator	1	1	1	386	1087	386	329		1589	1589	1589				female_bins_95_identity___4909
group_10469	COG1653	ABC-type glycerol-3-phosphate transport system	1	1	1	386	1088	386	330		1772	1772	1772				female_bins_95_identity___4910
group_1047	COG0472	UDP-N-acetylmuramyl pentapeptide phosphotransferase/UDP-N-acetylglucosamine-1-phosphate transferase (Rfe) (PDB:4J72)	1	1	1	14	41	14	82		1244	1244	1244	female_bins_95_identity___14438
group_10470	COG4209	ABC-type polysaccharide transport system	1	1	1	386	1089	386	331		941	941	941				female_bins_95_identity___4911
group_10471	COG0395	ABC-type glycerol-3-phosphate transport system	1	1	1	386	1090	386	332		917	917	917				female_bins_95_identity___4912
COG3405		Endo-1	1	1	1	386	1091	386	333		1172	1172	1172				female_bins_95_identity___4913
group_10473	COG5578	Uncharacterized membrane protein YesL (YesL)	1	1	1	386	1092	386	334		719	719	719				female_bins_95_identity___4914
group_10474			1	1	1	386	1093	386	335		686	686	686				female_bins_95_identity___4915
group_10475	COG0322	Excinuclease UvrABC	1	1	1	386	1094	386	336		1949	1949	1949				female_bins_95_identity___4916
group_10476	COG1493	Serine kinase of the HPr protein	1	1	1	386	1095	386	337		944	944	944				female_bins_95_identity___4917
group_10477	COG1940	Sugar kinase of the NBD/HSP70 family	1	1	1	386	1096	386	338		938	938	938				female_bins_95_identity___4918
group_10478	COG0812	UDP-N-acetylenolpyruvoylglucosamine reductase (MurB) (PDB:2MBR)	1	1	1	386	1097	386	339		917	917	917				female_bins_95_identity___4919
group_10479	COG1660	RNase adaptor protein RapZ for GlmZ sRNA degradation	1	1	1	386	1098	386	340		854	854	854				female_bins_95_identity___4920
group_1048	COG0771	UDP-N-acetylmuramoylalanine-D-glutamate ligase (MurD) (PDB:1E0D)	1	1	1	14	42	14	83		1364	1364	1364	female_bins_95_identity___14439
group_10480	COG1481	DNA-binding transcriptional regulator WhiA	1	1	1	386	1099	386	341		878	878	878				female_bins_95_identity___4921
group_10481	COG1925	HPr or related phosphotransfer protein (PtsH) (PDB:1CM2)	1	1	1	386	1100	386	342		257	257	257				female_bins_95_identity___4922
group_10482	COG1597	Phosphatidylglycerol kinase	1	1	1	386	1101	386	343		890	890	890				female_bins_95_identity___4923
group_10483	COG0191	Fructose/tagatose bisphosphate aldolase (Fba) (PDB:1B57)	1	1	1	386	1102	386	344		863	863	863				female_bins_95_identity___4924
group_10484			1	1	1	386	1103	386	345		479	479	479				female_bins_95_identity___4925
group_10485	COG0652	Peptidyl-prolyl cis-trans isomerase (rotamase) - cyclophilin family (PpiB) (PDB:4DGD)	1	1	1	386	1104	386	346		533	533	533				female_bins_95_identity___4926
COG1670		Protein N-acetyltransferase	1	1	1	386	1105	386	347		896	896	896				female_bins_95_identity___4927
group_10487			1	1	1	386	1106	386	348		1907	1907	1907				female_bins_95_identity___4928
group_10488			1	1	1	386	1107	386	349		152	152	152				female_bins_95_identity___4929
group_10489	COG1132	ABC-type multidrug transport system	1	1	1	386	1108	386	350		1430	1430	1430				female_bins_95_identity___4930
group_1049	COG0772	Peptodoglycan polymerase FtsW/RodA/SpoVE (FtsW) (PDB:6BAR) (PUBMED:30692671)	1	1	1	14	43	14	84		1433	1433	1433	female_bins_95_identity___14440
group_10490	COG0456	Ribosomal protein S18 acetylase RimI and related acetyltransferases (RimI) (PDB:1GHE)	1	1	1	386	1109	386	351		458	458	458				female_bins_95_identity___4931
group_10491	COG4283	Uncharacterized conserved protein DfsB/IRC4	1	1	1	386	1110	386	352		545	545	545				female_bins_95_identity___4932
COG2378		Predicted DNA-binding transcriptional regulator YobV	1	1	1	386	1111	386	353		893	893	893				female_bins_95_identity___4933
group_10493	COG0004	Ammonia channel protein AmtB (AmtB) (PDB:1U77)	1	1	1	386	1112	386	354		1742	1742	1742				female_bins_95_identity___4934
group_10494	COG0469	Pyruvate kinase (PykF) (PDB:6QXL)	1	1	1	386	1113	386	355		1466	1466	1466				female_bins_95_identity___4935
group_10495	COG0679	Predicted permease	1	1	1	386	1114	386	356		995	995	995				female_bins_95_identity___4936
group_10496	COG0554	Glycerol kinase (GlpK) (PDB:2ZF5)	1	1	1	386	1115	386	357		1505	1505	1505				female_bins_95_identity___4937
group_10497	COG3345	Alpha-galactosidase (GalA) (PDB:2XN0)	1	1	1	386	1116	386	358		2210	2210	2210				female_bins_95_identity___4938
group_10498	COG0436	Aspartate/methionine/tyrosine aminotransferase (AspB) (PDB:2O0R)	1	1	1	386	1117	386	359		1187	1187	1187				female_bins_95_identity___4939
group_10499	COG4667	Predicted phospholipase	1	1	1	386	1118	386	360		851	851	851				female_bins_95_identity___4940
group_1050	COG1188	Ribosomal 50S subunit-recycling heat shock protein	1	1	1	14	44	14	85		395	395	395	female_bins_95_identity___14441
group_10500	COG1968	Undecaprenyl pyrophosphate phosphatase (UppP) (PDB:5OON)	1	1	1	386	1119	386	361		854	854	854				female_bins_95_identity___4941
group_10501			1	1	1	386	1120	386	362		446	446	446				female_bins_95_identity___4942
COG1420		Transcriptional regulator of heat shock response (HrcA) (PDB:1STZ)	1	1	1	386	1121	386	363		1043	1043	1043				female_bins_95_identity___4943
group_10503	COG0576	Molecular chaperone GrpE (heat shock protein HSP-70) (GrpE) (PDB:1DKG)	1	1	1	386	1122	386	364		695	695	695				female_bins_95_identity___4944
group_10504	COG0443	Molecular chaperone DnaK (HSP70) (DnaK) (PDB:3I33)	1	1	1	386	1123	386	365		1880	1880	1880				female_bins_95_identity___4945
group_10505	COG0484	DnaJ-class molecular chaperone with C-terminal Zn finger domain (DnaJ) (PDB:1BQ0)	1	1	1	386	1124	386	366		1160	1160	1160				female_bins_95_identity___4946
group_10506			1	1	1	386	1125	386	367		1607	1607	1607				female_bins_95_identity___4947
group_10507	COG1396	Transcriptional regulator	1	1	1	386	1126	386	368		254	254	254				female_bins_95_identity___4948
group_10508			1	1	1	386	1127	386	369		1187	1187	1187				female_bins_95_identity___4949
group_10509	COG2264	Ribosomal protein L11 methylase PrmA (PrmA) (PDB:3GRZ)	1	1	1	386	1128	386	370		986	986	986				female_bins_95_identity___4950
COG0546		Phosphoglycolate phosphatase	1	1	1	14	45	14	86		647	647	647	female_bins_95_identity___14442
group_10510	COG5652	VanZ-like family protein (function unknown) (VanZ)	1	1	1	386	1129	386	371		506	506	506				female_bins_95_identity___4951
group_10511	COG1385	16S rRNA U1498 N3-methylase RsmE (RsmE) (PDB:1NXZ)	1	1	1	386	1130	386	372		740	740	740				female_bins_95_identity___4952
group_10512	COG1104	Cysteine desulfurase/Cysteine sulfinate desulfinase IscS or related enzyme	1	1	1	386	1131	386	373		1154	1154	1154				female_bins_95_identity___4953
group_10513	COG0301	Adenylyl- and sulfurtransferase ThiI (thiamine and tRNA 4-thiouridine biosynthesis) (ThiI) (PDB:1VBK) (PUBMED:22773787)	1	1	1	386	1132	386	374		1268	1268	1268				female_bins_95_identity___4954
group_10514	COG1925	HPr or related phosphotransfer protein (PtsH) (PDB:1CM2)	1	1	1	386	1133	386	375		230	230	230				female_bins_95_identity___4955
group_10515	COG0621	tRNA A37 methylthiotransferase MiaB (MiaB) (PDB:4JC0) (PUBMED:17407324	1	1	1	386	1134	386	376		1346	1346	1346				female_bins_95_identity___4956
COG4472		Uncharacterized conserved protein	1	1	1	386	1135	386	377		263	263	263				female_bins_95_identity___4957
group_10517	COG0816	YqgF/RuvX protein	1	1	1	386	1136	386	378		419	419	419				female_bins_95_identity___4958
group_10518			1	1	1	386	1137	386	379		254	254	254				female_bins_95_identity___4959
group_10519	COG0595	mRNA degradation ribonuclease J1/J2 (RnjA) (PDB:3T3N)	1	1	1	386	1138	386	380		1706	1706	1706				female_bins_95_identity___4960
group_1052			1	1	1	14	46	14	87		254	254	254	female_bins_95_identity___14443
group_10520			1	1	1	386	1139	386	381		344	344	344				female_bins_95_identity___4961
group_10521	COG1559	Endolytic transglycosylase MltG	1	1	1	386	1140	386	382		608	608	608				female_bins_95_identity___4962
COG4122		tRNA 5-hydroxyU34 O-methylase TrmR/YrrM (TrmR) (PDB:1H1D) (PUBMED:29982645)	1	1	1	386	1141	386	383		650	650	650				female_bins_95_identity___4963
group_10523	COG0826	23S rRNA C2501 and tRNA U34 5'-hydroxylation protein RlhA/YrrN/YrrO	1	1	1	386	1142	386	384		1226	1226	1226				female_bins_95_identity___4964
group_10524	COG3968	Glutamine synthetase type III (GlnA3)	1	1	1	386	1143	386	385		2111	2111	2111				female_bins_95_identity___4965
group_10525	COG0840	Methyl-accepting chemotaxis protein (MCP) (Tar) (PDB:1QU7)	1	1	1	386	1144	386	386		2033	2033	2033				female_bins_95_identity___4966
group_10526	COG1609	DNA-binding transcriptional regulator	1	1	1	386	1145	386	387		1031	1031	1031				female_bins_95_identity___4967
group_10527	COG3884	Acyl-ACP thioesterase (FatA) (PDB:2ESS)	1	1	1	386	1146	386	388		725	725	725				female_bins_95_identity___4968
COG2996		Predicted RNA-binding protein YitL	1	1	1	386	1147	386	389		833	833	833				female_bins_95_identity___4969
group_10529			1	1	1	386	1148	386	390		233	233	233				female_bins_95_identity___4970
group_1053			1	1	1	14	47	14	88		335	335	335	female_bins_95_identity___14444
group_10530	COG1266	Membrane protease YdiL	1	1	1	386	1149	386	391		920	920	920				female_bins_95_identity___4971
group_10531			1	1	1	386	1150	386	392		191	191	191				female_bins_95_identity___4972
group_10532			1	1	1	386	1151	386	393		662	662	662				female_bins_95_identity___4973
group_10533	COG3835	Sugar diacid utilization regulator CdaR (CdaR)	1	1	1	386	1152	386	394		1088	1088	1088				female_bins_95_identity___4974
group_10534	COG2884	Cell division ATPase FtsE (FtsE)	1	1	1	386	1153	386	395		788	788	788				female_bins_95_identity___4975
group_10535	COG2177	Cell division protein FtsX (FtsX)	1	1	1	386	1154	386	396		896	896	896				female_bins_95_identity___4976
group_10536	COG0739	Murein DD-endopeptidase MepM and murein hydrolase activator NlpD	1	1	1	386	1155	386	397		1208	1208	1208				female_bins_95_identity___4977
COG0793		C-terminal processing protease CtpA/Prc	1	1	1	386	1156	386	398		1328	1328	1328				female_bins_95_identity___4978
group_10538	COG4193	Beta- N-acetylglucosaminidase (LytD) (PDB:6FXO)	1	1	1	386	1157	386	399		4724	4724	4724				female_bins_95_identity___4979
group_10539	COG0745	DNA-binding response regulator	1	1	1	386	1158	386	400		2564	2564	2564				female_bins_95_identity___4980
COG0623		Enoyl-[acyl-carrier-protein] reductase FabI (FabI) (PDB:1C14)	1	1	1	14	48	14	89		878	878	878	female_bins_95_identity___14445
group_10540			1	1	1	386	1159	386	401		143	143	143				female_bins_95_identity___4981
group_10541	COG0556	Excinuclease UvrABC helicase subunit UvrB (UvrB) (PDB:1C4O)	1	1	1	386	1160	386	402		1988	1988	1988				female_bins_95_identity___4982
group_10542	COG0178	Excinuclease UvrABC ATPase subunit (UvrA) (PDB:2R6F)	1	1	1	386	1161	386	403		2864	2864	2864				female_bins_95_identity___4983
group_10543			1	1	1	386	1162	386	404		671	671	671				female_bins_95_identity___4984
group_10544	COG1077	Cell shape-determining ATPase MreB	1	1	1	386	1163	386	405		992	992	992				female_bins_95_identity___4985
COG4786		Flagellar basal body rod protein FlgG (FlgG) (PDB:6JZR)	1	1	1	386	1164	386	406		776	776	776				female_bins_95_identity___4986
group_10546	COG4786	Flagellar basal body rod protein FlgG (FlgG) (PDB:6JZR)	1	1	1	386	1165	386	407		818	818	818				female_bins_95_identity___4987
group_10547			1	1	1	386	1166	386	408		371	371	371				female_bins_95_identity___4988
group_10548	COG0507	ATPase/5-3 helicase helicase subunit RecD of the DNA repair enzyme RecBCD (exonuclease V) (RecD) (PDB:1W36) (PUBMED:29901759	1	1	1	386	1167	386	409		2246	2246	2246				female_bins_95_identity___4989
group_10549	COG1040	DNA utilization protein ComFC/GntX	1	1	1	386	1168	386	410		728	728	728				female_bins_95_identity___4990
group_1055	COG1294	Cytochrome bd-type quinol oxidase	1	1	1	14	49	14	90		1124	1124	1124	female_bins_95_identity___14446
group_10550			1	1	1	386	1169	386	411		407	407	407				female_bins_95_identity___4991
group_10551			1	1	1	386	1170	386	412		389	389	389				female_bins_95_identity___4992
group_10552			1	1	1	386	1171	386	413		947	947	947				female_bins_95_identity___4993
COG1624		c-di-AMP synthetase	1	1	1	386	1172	386	414		869	869	869				female_bins_95_identity___4994
group_10554	COG4856	Cyclic di-AMP synthase regulator CdaR	1	1	1	386	1173	386	415		1286	1286	1286				female_bins_95_identity___4995
group_10555	COG1109	Phosphomannomutase (ManB) (PDB:6MNV)	1	1	1	386	1174	386	416		1349	1349	1349				female_bins_95_identity___4996
group_10556	COG1925	HPr or related phosphotransfer protein (PtsH) (PDB:1CM2)	1	1	1	386	1175	386	417		263	263	263				female_bins_95_identity___4997
group_10557	COG0119	Isopropylmalate/homocitrate/citramalate synthases (LeuA) (PDB:4JN6)	1	1	1	386	1176	386	418		1736	1736	1736				female_bins_95_identity___4998
group_10558	COG0846	NAD-dependent protein deacetylase	1	1	1	386	1177	386	419		719	719	719				female_bins_95_identity___4999
COG4481		Uncharacterized conserved protein	1	1	1	386	1178	386	420		182	182	182				female_bins_95_identity___5000
group_1056	COG1271	Cytochrome bd-type quinol oxidase	1	1	1	14	50	14	91		1574	1574	1574	female_bins_95_identity___14447
group_10560	COG0360	Ribosomal protein S6 (RpsF) (PDB:4V4H)	1	1	1	386	1179	386	421		293	293	293				female_bins_95_identity___5001
group_10561	COG0629	Single-stranded DNA-binding protein (Ssb) (PDB:1EQQ)	1	1	1	386	1180	386	422		440	440	440				female_bins_95_identity___5002
group_10562	COG0238	Ribosomal protein S18 (RpsR) (PDB:4V4H)	1	1	1	386	1181	386	423		263	263	263				female_bins_95_identity___5003
group_10563	COG3887	Cyclic di-AMP phosphodiesterase GdpP	1	1	1	386	1182	386	424		2051	2051	2051				female_bins_95_identity___5004
group_10564	COG0359	Ribosomal protein L9 (RplI) (PDB:1VS6) (PUBMED:27112601)	1	1	1	386	1183	386	425		446	446	446				female_bins_95_identity___5005
group_10565	COG0305	Replicative DNA helicase (DnaB) (PDB:1B79)	1	1	1	386	1184	386	426		1343	1343	1343				female_bins_95_identity___5006
group_10566	COG0789	DNA-binding transcriptional regulator	1	1	1	386	1185	386	427		719	719	719				female_bins_95_identity___5007
group_10567	COG4231	TPP-dependent indolepyruvate ferredoxin oxidoreductase	1	1	1	386	1186	386	428		170	170	170				female_bins_95_identity___5008
group_10568	COG1180	Pyruvate-formate lyase-activating enzyme (PflA) (PDB:3CAN)	1	1	1	386	1187	386	429		761	761	761				female_bins_95_identity___5009
group_10569			1	1	1	386	1189	386	431		209	209	209				female_bins_95_identity___5011
group_1057			1	1	1	14	51	14	92		215	215	215	female_bins_95_identity___14448
group_10570	COG1882	Pyruvate-formate lyase (PflD) (PDB:1CM5)	1	1	1	386	1190	386	432		2039	2039	2039				female_bins_95_identity___5012
group_10571	COG3882	Predicted enzyme involved in methoxymalonyl-ACP biosynthesis (FkbH)	1	1	1	386	1191	386	433		1892	1892	1892				female_bins_95_identity___5013
COG2846		Iron-sulfur cluster repair protein YtfE	1	1	1	386	1192	386	434		191	191	191				female_bins_95_identity___5014
group_10573	COG1696	D-alanyl-lipoteichoic acid acyltransferase DltB	1	1	1	386	1193	386	435		1421	1421	1421				female_bins_95_identity___5015
group_10574			1	1	1	386	1194	386	436		1145	1145	1145				female_bins_95_identity___5016
group_10575	COG4862	Negative regulator MecA of genetic competence	1	1	1	386	1195	386	437		746	746	746				female_bins_95_identity___5017
group_10576	COG3858	Spore cortex hydrolase SleL/YaaH	1	1	1	386	1196	386	438		1700	1700	1700				female_bins_95_identity___5018
group_10577	COG1179	tRNA A37 threonylcarbamoyladenosine dehydratase (TcdA) (PDB:4D7A) (PUBMED:27913733)	1	1	1	386	1197	386	439		716	716	716				female_bins_95_identity___5019
group_10578	COG1959	DNA-binding transcriptional regulator	1	1	1	386	1198	386	440		434	434	434				female_bins_95_identity___5020
group_10579	COG1104	Cysteine desulfurase/Cysteine sulfinate desulfinase IscS or related enzyme	1	1	1	386	1199	386	441		1184	1184	1184				female_bins_95_identity___5021
group_1058	COG0149	Triosephosphate isomerase (TpiA) (PDB:1HG3)	1	1	1	14	52	14	93		1148	1148	1148	female_bins_95_identity___14449
group_10580	COG0822	Fe-S cluster assembly scaffold protein IscU	1	1	1	386	1200	386	442		521	521	521				female_bins_95_identity___5022
group_10581	COG0860	N-acetylmuramoyl-L-alanine amidase (AmiC) (PDB:1JWQ)	1	1	1	386	1201	386	443		713	713	713				female_bins_95_identity___5023
group_10582	COG0009	tRNA A37 threonylcarbamoyladenosine synthetase subunit TsaC/SUA5/YrdC (TsaC) (PDB:1HRU)	1	1	1	386	1202	386	444		1049	1049	1049				female_bins_95_identity___5024
group_10583	COG0394	Protein-tyrosine-phosphatase (Wzb) (PDB:4D74) (PUBMED:26641313)	1	1	1	386	1203	386	445		437	437	437				female_bins_95_identity___5025
group_10584	COG3773	Cell wall hydrolase CwlJ	1	1	1	386	1204	386	446		1199	1199	1199				female_bins_95_identity___5026
group_10585	COG2306	Predicted RNA-binding protein	1	1	1	386	1205	386	447		482	482	482				female_bins_95_identity___5027
group_10586			1	1	1	386	1206	386	448		287	287	287				female_bins_95_identity___5028
group_10587			1	1	1	386	1207	386	449		401	401	401				female_bins_95_identity___5029
group_10588	COG0356	FoF1-type ATP synthase	1	1	1	386	1208	386	450		719	719	719				female_bins_95_identity___5030
group_10589	COG0711	FoF1-type ATP synthase	1	1	1	386	977	386	566		563	563	563				female_bins_95_identity___5032
group_1059	COG1409	3'	1	1	1	14	53	14	94		1262	1262	1262	female_bins_95_identity___14450
group_10590	COG0712	FoF1-type ATP synthase	1	1	1	386	976	386	565		545	545	545				female_bins_95_identity___5033
group_10591	COG0056	FoF1-type ATP synthase	1	1	1	386	975	386	564		1505	1505	1505				female_bins_95_identity___5034
group_10592	COG0224	FoF1-type ATP synthase	1	1	1	386	974	386	563		863	863	863				female_bins_95_identity___5035
group_10593	COG0055	FoF1-type ATP synthase	1	1	1	386	973	386	562		1403	1403	1403				female_bins_95_identity___5036
group_10594	COG0355	FoF1-type ATP synthase	1	1	1	386	972	386	561		413	413	413				female_bins_95_identity___5037
group_10595			1	1	1	386	971	386	560		422	422	422				female_bins_95_identity___5038
group_10596	COG2227	2-polyprenyl-3-methyl-5-hydroxy-6-metoxy-1	1	1	1	386	970	386	559		1175	1175	1175				female_bins_95_identity___5039
group_10597	COG4990	Predicted cysteine peptidase	1	1	1	386	969	386	558		2540	2540	2540				female_bins_95_identity___5040
group_10598	COG0637	Beta-phosphoglucomutase	1	1	1	386	968	386	557		665	665	665				female_bins_95_identity___5041
group_10599	COG3663	G:T/U-mismatch repair DNA glycosylase (Mug) (PDB:1MTL)	1	1	1	386	967	386	556		485	485	485				female_bins_95_identity___5042
group_1060	COG1190	Lysyl-tRNA synthetase (class II) (LysU) (PDB:1BBU)	1	1	1	14	54	14	95		1718	1718	1718	female_bins_95_identity___14451
group_10600	COG2364	Uncharacterized membrane protein YczE (YczE)	1	1	1	386	966	386	555		650	650	650				female_bins_95_identity___5043
group_10601	COG3973	DNA helicase IV (HelD)	1	1	1	386	965	386	554		3230	3230	3230				female_bins_95_identity___5044
COG4708		ECF-type transporter of queuosine precursor	1	1	1	386	964	386	553		554	554	554				female_bins_95_identity___5045
group_10603			1	1	1	386	963	386	552		2924	2924	2924				female_bins_95_identity___5046
group_10604	COG0462	Phosphoribosylpyrophosphate synthetase (PrsA) (PDB:1DKR)	1	1	1	386	962	386	551		1187	1187	1187				female_bins_95_identity___5047
group_10605	COG1484	DNA replication protein DnaC (DnaC) (PDB:2QGZ)	1	1	1	386	961	386	550		971	971	971				female_bins_95_identity___5048
group_10606	COG3935	DNA replication protein DnaD (DnaD) (PDB:2I5U)	1	1	1	386	960	386	549		989	989	989				female_bins_95_identity___5049
group_10607	COG0773	UDP-N-acetylmuramate-alanine ligase MurC and related ligases	1	1	1	386	959	386	548		1379	1379	1379				female_bins_95_identity___5050
group_10608	COG0448	Glucose-1-phosphate adenylyltransferase (ADP-glucose pyrophosphorylase) (GlgC) (PDB:5MNI) (PUBMED:27545622)	1	1	1	386	958	386	547		1274	1274	1274				female_bins_95_identity___5051
group_10609	COG0448	Glucose-1-phosphate adenylyltransferase (ADP-glucose pyrophosphorylase) (GlgC) (PDB:5MNI) (PUBMED:27545622)	1	1	1	386	957	386	546		1118	1118	1118				female_bins_95_identity___5052
group_1061	COG0671	Membrane-associated phospholipid phosphatase (PgpB) (PDB:1D2T)	1	1	1	14	55	14	96		641	641	641	female_bins_95_identity___14452
group_10610	COG2088	DNA-binding protein SpoVG	1	1	1	386	956	386	545		272	272	272				female_bins_95_identity___5053
group_10611	COG0193	Peptidyl-tRNA hydrolase (Pth) (PDB:1RYB) (PUBMED:11835511)	1	1	1	386	955	386	544		668	668	668				female_bins_95_identity___5054
group_10612	COG1197	Transcription-repair coupling factor (superfamily II helicase) (Mfd) (PDB:2EYQ)	1	1	1	386	954	386	543		3563	3563	3563				female_bins_95_identity___5055
group_10613			1	1	1	386	953	386	542		110	110	110				female_bins_95_identity___5056
COG2730		Aryl-phospho-beta-D-glucosidase BglC	1	1	1	386	952	386	541		1307	1307	1307				female_bins_95_identity___5057
group_10615	COG0596	2-succinyl-6-hydroxy-2	1	1	1	386	951	386	540		761	761	761				female_bins_95_identity___5058
group_10616	COG0770	UDP-N-acetylmuramyl pentapeptide synthase (MurF) (PDB:4CVK)	1	1	1	386	950	386	539		1568	1568	1568				female_bins_95_identity___5059
group_10617	COG1181	D-alanine-D-alanine ligase or related ATP-grasp enzyme (DdlA) (PDB:1E4E)	1	1	1	386	949	386	538		1181	1181	1181				female_bins_95_identity___5060
group_10618	COG2355	Zn-dependent dipeptidase	1	1	1	386	948	386	537		974	974	974				female_bins_95_identity___5061
group_10619	COG5845	Stage V sporulation protein SpoVT	1	1	1	386	947	386	536		545	545	545				female_bins_95_identity___5062
group_1062	COG1696	D-alanyl-lipoteichoic acid acyltransferase DltB	1	1	1	14	56	14	97		1496	1496	1496	female_bins_95_identity___14453
group_10620			1	1	1	386	946	386	535		329	329	329				female_bins_95_identity___5063
group_10621	COG0389	Nucleotidyltransferase/DNA polymerase DinP involved in DNA repair (DinP) (PDB:4R8U) (PUBMED:16544291)	1	1	1	386	945	386	534		1271	1271	1271				female_bins_95_identity___5064
group_10622			1	1	1	386	944	386	533		422	422	422				female_bins_95_identity___5065
group_10623	COG0747	ABC-type transport system	1	1	1	386	943	386	532		1625	1625	1625				female_bins_95_identity___5066
group_10624	COG0444	ABC-type dipeptide/oligopeptide/nickel transport system	1	1	1	386	942	386	531		992	992	992				female_bins_95_identity___5067
group_10625			1	1	1	386	941	386	530		1418	1418	1418				female_bins_95_identity___5068
COG4608		ABC-type oligopeptide transport system	1	1	1	386	940	386	529		1007	1007	1007				female_bins_95_identity___5069
group_10627	COG0601	ABC-type dipeptide/oligopeptide/nickel transport system	1	1	1	386	939	386	528		947	947	947				female_bins_95_identity___5070
group_10628	COG1173	ABC-type dipeptide/oligopeptide/nickel transport system	1	1	1	386	938	386	527		911	911	911				female_bins_95_identity___5071
group_10629	COG1696	D-alanyl-lipoteichoic acid acyltransferase DltB	1	1	1	386	937	386	526		1445	1445	1445				female_bins_95_identity___5072
group_1063	COG2755	Lysophospholipase L1 or related esterase. Includes spore coat protein LipC/YcsK (TesA) (PDB:1BWP)	1	1	1	14	57	14	98		1604	1604	1604	female_bins_95_identity___14454
group_10630			1	1	1	386	936	386	525		1319	1319	1319				female_bins_95_identity___5073
group_10631	COG4552	Predicted acetyltransferase (Eis) (PDB:2HV2)	1	1	1	386	935	386	524		1244	1244	1244				female_bins_95_identity___5074
group_10632	COG1307	Fatty acid-binding protein DegV (function unknown) (DegV) (PDB:1MGP)	1	1	1	386	934	386	523		884	884	884				female_bins_95_identity___5075
group_10633	COG0060	Isoleucyl-tRNA synthetase (IleS) (PDB:1FFY)	1	1	1	386	933	386	522		3155	3155	3155				female_bins_95_identity___5076
group_10634			1	1	1	386	932	386	521		1520	1520	1520				female_bins_95_identity___5077
group_10635	COG0058	Glucan phosphorylase (GlgP) (PDB:1A8I)	1	1	1	386	931	386	520		2483	2483	2483				female_bins_95_identity___5078
group_10636	COG2262	50S ribosomal subunit-associated GTPase HflX (HflX) (PDB:2QTF) (PUBMED:22905870)	1	1	1	386	930	386	519		1310	1310	1310				female_bins_95_identity___5079
COG3274		Surface polysaccharide O-acyltransferase WecH (WecH) (PUBMED:16936038)	1	1	1	386	929	386	518		1058	1058	1058				female_bins_95_identity___5080
group_10638	COG0840	Methyl-accepting chemotaxis protein (MCP) (Tar) (PDB:1QU7)	1	1	1	386	928	386	517		1712	1712	1712				female_bins_95_identity___5081
group_10639	COG1048	Aconitase A (AcnA) (PDB:1ACO)	1	1	1	386	927	386	516		2300	2300	2300				female_bins_95_identity___5082
group_1064	COG2738	Zn-dependent membrane protease YugP (YugP)	1	1	1	14	58	14	99		764	764	764	female_bins_95_identity___14455
group_10640	COG3507	Beta-xylosidase (XynB2) (PDB:1Y7B)	1	1	1	386	926	386	515		1028	1028	1028				female_bins_95_identity___5083
COG2931		Ca2+-binding protein	1	1	1	386	925	386	514		1145	1145	1145				female_bins_95_identity___5084
group_10642	COG2385	Peptidoglycan hydrolase (amidase) enhancer domain SpoIID (SpoIID)	1	1	1	386	924	386	513		1013	1013	1013				female_bins_95_identity___5085
group_10643	COG4942	Septal ring factor EnvC	1	1	1	386	923	386	512		911	911	911				female_bins_95_identity___5086
group_10644	COG1228	Imidazolonepropionase or related amidohydrolase (HutI) (PDB:3OOQ)	1	1	1	386	922	386	511		1211	1211	1211				female_bins_95_identity___5087
COG3291		Uncharacterized conserved protein	1	1	1	386	921	386	510		1586	1586	1586				female_bins_95_identity___5088
group_10646	COG0204	1-acyl-sn-glycerol-3-phosphate acyltransferase (PlsC) (PDB:1IUQ)	1	1	1	386	920	386	509		734	734	734				female_bins_95_identity___5089
group_10647			1	1	1	386	919	386	508		419	419	419				female_bins_95_identity___5090
group_10648	COG0044	Dihydroorotase or related cyclic amidohydrolase (AllB) (PDB:1J79)	1	1	1	386	918	386	507		1361	1361	1361				female_bins_95_identity___5091
group_10649	COG0543	NAD(P)H-flavin reductase (Mcr1) (PDB:3A1F)	1	1	1	386	917	386	506		857	857	857				female_bins_95_identity___5092
group_1065	COG4221	NADP-dependent 3-hydroxy acid dehydrogenase YdfG (YdfG) (PDB:3P19)	1	1	1	14	125	14	100		746	746	746	female_bins_95_identity___14456
group_10650	COG0167	Dihydroorotate dehydrogenase (PyrD) (PDB:1GT8)	1	1	1	386	916	386	505		902	902	902				female_bins_95_identity___5093
group_10651	COG1388	LysM repeat (LysM) (PDB:1E0G)	1	1	1	386	915	386	504		1556	1556	1556				female_bins_95_identity___5094
group_10652	COG0739	Murein DD-endopeptidase MepM and murein hydrolase activator NlpD	1	1	1	386	914	386	503		764	764	764				female_bins_95_identity___5095
COG1664		Cytoskeletal protein CcmA	1	1	1	386	913	386	502		494	494	494				female_bins_95_identity___5096
group_10654	COG2972	Sensor histidine kinase YesM (YesM)	1	1	1	386	912	386	501		1814	1814	1814				female_bins_95_identity___5097
group_10655	COG4209	ABC-type polysaccharide transport system	1	1	1	386	911	386	500		941	941	941				female_bins_95_identity___5098
group_10656	COG0395	ABC-type glycerol-3-phosphate transport system	1	1	1	386	910	386	499		887	887	887				female_bins_95_identity___5099
group_10657	COG1653	ABC-type glycerol-3-phosphate transport system	1	1	1	386	909	386	498		1748	1748	1748				female_bins_95_identity___5100
group_10658	COG4753	Two-component response regulator	1	1	1	386	908	386	497		1580	1580	1580				female_bins_95_identity___5101
group_10659	COG1653	ABC-type glycerol-3-phosphate transport system	1	1	1	386	907	386	496		1745	1745	1745				female_bins_95_identity___5102
group_1066	COG4591	ABC-type transport system involved in lipoprotein release	1	1	1	14	124	14	101		1274	1274	1274	female_bins_95_identity___14457
group_10660	COG1472	Periplasmic beta-glucosidase and related glycosidases (BglX) (PDB:2X40)	1	1	1	386	906	386	495		2996	2996	2996				female_bins_95_identity___5103
group_10661	COG3669	Alpha-L-fucosidase (AfuC) (PDB:1HL8) (PUBMED:16855233)	1	1	1	386	905	386	494		1484	1484	1484				female_bins_95_identity___5104
group_10662	COG1874	Beta-galactosidase GanA (GanA) (PDB:1KWG)	1	1	1	386	904	386	493		2015	2015	2015				female_bins_95_identity___5105
group_10663			1	1	1	386	903	386	492		617	617	617				female_bins_95_identity___5106
group_10664	COG1680	CubicO group peptidase	1	1	1	386	902	386	491		1184	1184	1184				female_bins_95_identity___5107
group_10665	COG1947	4-diphosphocytidyl-2C-methyl-D-erythritol kinase (IspE) (PDB:1OJ4)	1	1	1	386	901	386	490		878	878	878				female_bins_95_identity___5108
group_10666	COG1802	DNA-binding transcriptional regulator	1	1	1	386	900	386	489		677	677	677				female_bins_95_identity___5109
group_10667			1	1	1	386	899	386	488		311	311	311				female_bins_95_identity___5110
group_10668	COG0796	Glutamate racemase (MurI) (PDB:1B73)	1	1	1	386	898	386	487		896	896	896				female_bins_95_identity___5111
COG4506		Uncharacterized beta-barrel protein YwiB	1	1	1	386	897	386	486		449	449	449				female_bins_95_identity___5112
group_1067	COG2226	Ubiquinone/menaquinone biosynthesis C-methylase UbiE/MenG (UbiE) (PDB:4OBW)	1	1	1	14	123	14	102		668	668	668	female_bins_95_identity___14458
group_10670			1	1	1	386	896	386	485		476	476	476				female_bins_95_identity___5113
group_10671	COG0544	FKBP-type peptidyl-prolyl cis-trans isomerase (trigger factor) (Tig) (PDB:5OWI)	1	1	1	386	895	386	484		1037	1037	1037				female_bins_95_identity___5114
COG0017		Aspartyl/asparaginyl-tRNA synthetase (AsnS) (PDB:3KFU)	1	1	1	386	894	386	483		1391	1391	1391				female_bins_95_identity___5115
group_10673	COG0791	Cell wall-associated hydrolase	1	1	1	386	893	386	482		1232	1232	1232				female_bins_95_identity___5116
group_10674			1	1	1	386	892	386	481		1670	1670	1670				female_bins_95_identity___5117
group_10675	COG1506	Dipeptidyl aminopeptidase/acylaminoacyl peptidase (DAP2) (PDB:2JBW)	1	1	1	386	891	386	480		1901	1901	1901				female_bins_95_identity___5118
group_10676	COG2207	AraC-type DNA-binding domain and AraC-containing proteins (AraC) (PDB:1BL0)	1	1	1	386	890	386	479		842	842	842				female_bins_95_identity___5119
group_10677	COG5434	Polygalacturonase (Pgu1) (PDB:1BHE)	1	1	1	386	889	386	478		1181	1181	1181				female_bins_95_identity___5120
group_10678	COG1609	DNA-binding transcriptional regulator	1	1	1	386	888	386	477		1124	1124	1124				female_bins_95_identity___5121
group_10679	COG1653	ABC-type glycerol-3-phosphate transport system	1	1	1	386	887	386	476		1391	1391	1391				female_bins_95_identity___5122
group_1068			1	1	1	14	122	14	103		515	515	515	female_bins_95_identity___14459
group_10680	COG1175	ABC-type sugar transport system	1	1	1	386	886	386	475		920	920	920				female_bins_95_identity___5123
group_10681	COG0395	ABC-type glycerol-3-phosphate transport system	1	1	1	386	885	386	474		887	887	887				female_bins_95_identity___5124
group_10682	COG1180	Pyruvate-formate lyase-activating enzyme (PflA) (PDB:3CAN)	1	1	1	386	884	386	473		866	866	866				female_bins_95_identity___5125
group_10683	COG1882	Pyruvate-formate lyase (PflD) (PDB:1CM5)	1	1	1	386	883	386	472		2210	2210	2210				female_bins_95_identity___5126
group_10684	COG0383	Alpha-mannosidase (MngB) (PDB:5KBP) (PUBMED:14645248)	1	1	1	386	882	386	471		3092	3092	3092				female_bins_95_identity___5127
group_10685	COG0571	dsRNA-specific ribonuclease (Rnc) (PDB:1DI2)	1	1	1	386	881	386	470		1043	1043	1043				female_bins_95_identity___5128
group_10686	COG5830	Stage III sporulation protein SpoIIID	1	1	1	386	880	386	469		257	257	257				female_bins_95_identity___5129
group_10687	COG0518	GMP synthase	1	1	1	386	879	386	468		1541	1541	1541				female_bins_95_identity___5130
group_10688	COG2207	AraC-type DNA-binding domain and AraC-containing proteins (AraC) (PDB:1BL0)	1	1	1	386	878	386	467		770	770	770				female_bins_95_identity___5131
group_10689	COG0491	Glyoxylase or a related metal-dependent hydrolase	1	1	1	386	877	386	466		644	644	644				female_bins_95_identity___5132
group_1069			1	1	1	14	121	14	104		446	446	446	female_bins_95_identity___14460
COG3622		Hydroxypyruvate/dehydroerythronate isomerase	1	1	1	386	876	386	465		764	764	764				female_bins_95_identity___5133
group_10691	COG1609	DNA-binding transcriptional regulator	1	1	1	386	875	386	464		1022	1022	1022				female_bins_95_identity___5134
group_10692	COG1879	ABC-type sugar transport system	1	1	1	386	874	386	463		1040	1040	1040				female_bins_95_identity___5135
group_10693	COG1129	ABC-type sugar transport system	1	1	1	386	873	386	462		1493	1493	1493				female_bins_95_identity___5136
group_10694	COG1172	Ribose/xylose/arabinose/galactoside ABC-type transport system	1	1	1	386	872	386	461		998	998	998				female_bins_95_identity___5137
COG3324		Lactoylglutathione lyase-related enzyme	1	1	1	386	871	386	460		884	884	884				female_bins_95_identity___5138
group_10696	COG0673	Predicted dehydrogenase (MviM) (PDB:3UUW)	1	1	1	386	870	386	459		1133	1133	1133				female_bins_95_identity___5139
group_10697	COG1082	Sugar phosphate isomerase/epimerase (YcjR) (PDB:3KTC) (PUBMED:30742415)	1	1	1	386	869	386	458		917	917	917				female_bins_95_identity___5140
group_10698	COG1082	Sugar phosphate isomerase/epimerase (YcjR) (PDB:3KTC) (PUBMED:30742415)	1	1	1	386	868	386	457		428	428	428				female_bins_95_identity___5141
group_10699	COG1082	Sugar phosphate isomerase/epimerase (YcjR) (PDB:3KTC) (PUBMED:30742415)	1	1	1	386	867	386	456		959	959	959				female_bins_95_identity___5142
group_1070			1	1	1	14	120	14	105		257	257	257	female_bins_95_identity___14461
COG2936		Predicted acyl esterase (PDB:1JU3)	1	1	1	386	866	386	455		1691	1691	1691				female_bins_95_identity___5143
group_10701	COG0840	Methyl-accepting chemotaxis protein (MCP) (Tar) (PDB:1QU7)	1	1	1	386	865	386	454		1586	1586	1586				female_bins_95_identity___5144
group_10702	COG2182	Maltose-binding periplasmic protein MalE (MalE) (PDB:1T0K)	1	1	1	386	864	386	453		1289	1289	1289				female_bins_95_identity___5145
group_10703			1	1	1	386	863	386	452		197	197	197				female_bins_95_identity___5146
group_10704	COG0518	GMP synthase	1	1	1	386	862	386	451		1292	1292	1292				female_bins_95_identity___5147
group_10705			1	1	1	380	2	365	2	Investigate	917	917	917				female_bins_95_identity___5148
group_10706			1	1	1	380	1	365	1	Investigate	485	485	485				female_bins_95_identity___5149
group_10707	COG4591	ABC-type transport system involved in lipoprotein release	1	1	1	2	1	2	105		2225	2225	2225				female_bins_95_identity___5571
group_10708	COG1136	ABC-type lipoprotein export system	1	1	1	2	2	2	106		698	698	698				female_bins_95_identity___5572
group_10709	COG5839	Stage V sporulation protein SpoVAEB	1	1	1	2	3	2	107		452	452	452				female_bins_95_identity___5573
group_1071	COG0847	DNA polymerase III	1	1	1	14	119	14	106		494	494	494	female_bins_95_identity___14462
group_10710	COG0703	Shikimate kinase (AroK) (PDB:1E6C)	1	1	1	2	4	2	108		527	527	527				female_bins_95_identity___5574
group_10711	COG0251	Enamine deaminase RidA	1	1	1	2	5	2	109		377	377	377				female_bins_95_identity___5575
group_10712			1	1	1	2	6	2	110		218	218	218				female_bins_95_identity___5576
group_10713			1	1	1	2	7	2	111		134	134	134				female_bins_95_identity___5577
COG2855		Uncharacterized membrane protein YadS	1	1	1	2	8	2	112		1040	1040	1040				female_bins_95_identity___5578
group_10715	COG3250	Beta-galactosidase/beta-glucuronidase (LacZ) (PDB:5N6U) (PUBMED:19291314)	1	1	1	2	9	2	113		2048	2048	2048				female_bins_95_identity___5579
COG5837		Stage V sporulation protein SpoVAD	1	1	1	2	10	2	114		1013	1013	1013				female_bins_95_identity___5580
group_10717	COG0840	Methyl-accepting chemotaxis protein (MCP) (Tar) (PDB:1QU7)	1	1	1	2	11	2	115		1466	1466	1466				female_bins_95_identity___5581
group_10718	COG2091	Phosphopantetheinyl transferase (Sfp) (PDB:1QR0)	1	1	1	2	12	2	116		692	692	692				female_bins_95_identity___5582
group_10719	COG0513	Superfamily II DNA and RNA helicase (SrmB) (PDB:3RRM)	1	1	1	2	13	2	117		1919	1919	1919				female_bins_95_identity___5583
group_1072			1	1	1	14	118	14	107		860	860	860	female_bins_95_identity___14463
group_10720	COG1284	Uncharacterized membrane-anchored protein YitT	1	1	1	2	14	2	118		860	860	860				female_bins_95_identity___5584
group_10721	COG1501	Alpha-glucosidase/xylosidase	1	1	1	2	15	2	119		2246	2246	2246				female_bins_95_identity___5585
group_10722			1	1	1	2	16	2	120		377	377	377				female_bins_95_identity___5586
group_10723	COG1766	Flagellar biosynthesis/type III secretory pathway M-ring protein FliF/YscJ (FliF) (PDB:6SCN)	1	1	1	2	17	2	121		431	431	431				female_bins_95_identity___5587
group_10724			1	1	1	2	18	2	122		1604	1604	1604				female_bins_95_identity___5588
group_10725	COG1595	DNA-directed RNA polymerase specialized sigma subunit	1	1	1	2	19	2	123		470	470	470				female_bins_95_identity___5589
group_10726	COG2226	Ubiquinone/menaquinone biosynthesis C-methylase UbiE/MenG (UbiE) (PDB:4OBW)	1	1	1	2	20	2	124		731	731	731				female_bins_95_identity___5590
group_10727			1	1	1	2	21	2	125		1229	1229	1229				female_bins_95_identity___5591
group_10728	COG1131	ABC-type multidrug transport system	1	1	1	2	22	2	126		887	887	887				female_bins_95_identity___5592
group_10729			1	1	1	2	23	2	127		755	755	755				female_bins_95_identity___5593
COG2814		Predicted arabinose efflux permease AraJ	1	1	1	14	117	14	108		1415	1415	1415	female_bins_95_identity___14464
group_10730	COG1595	DNA-directed RNA polymerase specialized sigma subunit	1	1	1	2	24	2	128		572	572	572				female_bins_95_identity___5594
group_10731	COG4905	Uncharacterized membrane protein (PUBMED:23490197)	1	1	1	2	25	2	129		575	575	575				female_bins_95_identity___5595
group_10732	COG1132	ABC-type multidrug transport system	1	1	1	2	26	2	130		1922	1922	1922				female_bins_95_identity___5596
group_10733	COG1132	ABC-type multidrug transport system	1	1	1	2	27	2	131		1733	1733	1733				female_bins_95_identity___5597
group_10734	COG1846	DNA-binding transcriptional regulator	1	1	1	2	28	2	132		569	569	569				female_bins_95_identity___5598
group_10735	COG1131	ABC-type multidrug transport system	1	1	1	2	29	2	133		833	833	833				female_bins_95_identity___5599
group_10736			1	1	1	2	30	2	134		800	800	800				female_bins_95_identity___5600
COG1983		Phage shock protein PspC (stress-responsive transcriptional regulator) (PspC)	1	1	1	2	31	2	135		197	197	197				female_bins_95_identity___5601
group_10738			1	1	1	2	32	2	136		1052	1052	1052				female_bins_95_identity___5602
group_10739	COG4709	Uncharacterized membrane protein	1	1	1	2	33	2	137		896	896	896				female_bins_95_identity___5603
group_1074	COG0826	23S rRNA C2501 and tRNA U34 5'-hydroxylation protein RlhA/YrrN/YrrO	1	1	1	14	116	14	109		1223	1223	1223	female_bins_95_identity___14465
group_10740	COG1695	DNA-binding transcriptional regulator	1	1	1	2	34	2	138		323	323	323				female_bins_95_identity___5604
group_10741	COG0840	Methyl-accepting chemotaxis protein (MCP) (Tar) (PDB:1QU7)	1	1	1	2	35	2	139		2000	2000	2000				female_bins_95_identity___5605
group_10742	COG1680	CubicO group peptidase	1	1	1	2	36	2	140		671	671	671				female_bins_95_identity___5606
group_10743	COG0789	DNA-binding transcriptional regulator	1	1	1	2	37	2	141		599	599	599				female_bins_95_identity___5607
group_10744	COG2755	Lysophospholipase L1 or related esterase. Includes spore coat protein LipC/YcsK (TesA) (PDB:1BWP)	1	1	1	2	38	2	142		1115	1115	1115				female_bins_95_identity___5608
group_10745	COG2152	Predicted glycosyl hydrolase	1	1	1	2	39	2	143		1022	1022	1022				female_bins_95_identity___5609
group_10746	COG2152	Predicted glycosyl hydrolase	1	1	1	2	40	2	144		1187	1187	1187				female_bins_95_identity___5610
group_10747	COG2942	Mannose or cellobiose epimerase	1	1	1	2	41	2	145		1172	1172	1172				female_bins_95_identity___5611
group_10748	COG0395	ABC-type glycerol-3-phosphate transport system	1	1	1	2	42	2	146		854	854	854				female_bins_95_identity___5612
group_10749	COG1175	ABC-type sugar transport system	1	1	1	2	43	2	147		1016	1016	1016				female_bins_95_identity___5613
group_1075	COG0142	Geranylgeranyl pyrophosphate synthase (IspA) (PDB:2AZJ)	1	1	1	14	115	14	110		971	971	971	female_bins_95_identity___14466
group_10750	COG1653	ABC-type glycerol-3-phosphate transport system	1	1	1	2	44	2	148		1487	1487	1487				female_bins_95_identity___5614
group_10751	COG2207	AraC-type DNA-binding domain and AraC-containing proteins (AraC) (PDB:1BL0)	1	1	1	2	45	2	149		896	896	896				female_bins_95_identity___5615
group_10752	COG1609	DNA-binding transcriptional regulator	1	1	1	2	46	2	150		1031	1031	1031				female_bins_95_identity___5616
group_10753	COG0642	Signal transduction histidine kinase (BaeS) (PDB:1JOY)	1	1	1	2	47	2	151		1274	1274	1274				female_bins_95_identity___5617
group_10754	COG0745	DNA-binding response regulator	1	1	1	2	48	2	152		680	680	680				female_bins_95_identity___5618
group_10755	COG1136	ABC-type lipoprotein export system	1	1	1	2	49	2	153		770	770	770				female_bins_95_identity___5619
group_10756	COG3127	Predicted ABC-type transport system involved in lysophospholipase L1 biosynthesis	1	1	1	2	50	2	154		2381	2381	2381				female_bins_95_identity___5620
group_10757			1	1	1	2	51	2	155		272	272	272				female_bins_95_identity___5621
group_10758			1	1	1	2	52	2	156		176	176	176				female_bins_95_identity___5622
group_10759	COG1132	ABC-type multidrug transport system	1	1	1	2	53	2	157		1838	1838	1838				female_bins_95_identity___5623
group_1076	COG1940	Sugar kinase of the NBD/HSP70 family	1	1	1	14	114	14	111		1001	1001	1001	female_bins_95_identity___14467
group_10760			1	1	1	2	54	2	158		980	980	980				female_bins_95_identity___5624
group_10761	COG2207	AraC-type DNA-binding domain and AraC-containing proteins (AraC) (PDB:1BL0)	1	1	1	2	55	2	159		881	881	881				female_bins_95_identity___5625
group_10762	COG1132	ABC-type multidrug transport system	1	1	1	2	56	2	160		1772	1772	1772				female_bins_95_identity___5626
group_10763	COG1132	ABC-type multidrug transport system	1	1	1	2	57	2	161		1745	1745	1745				female_bins_95_identity___5627
group_10764			1	1	1	2	58	2	162		92	92	92				female_bins_95_identity___5628
group_10765	COG0366	Glycosidase/amylase (phosphorylase) (AmyA) (PDB:2P67) (PUBMED:29684280)	1	1	1	2	59	2	163		1310	1310	1310				female_bins_95_identity___5629
group_10766			1	1	1	2	60	2	164		125	125	125				female_bins_95_identity___5630
group_10767	COG0648	Endonuclease IV (Nfo) (PDB:2NQH)	1	1	1	2	61	2	165		851	851	851				female_bins_95_identity___5631
group_10768	COG1396	Transcriptional regulator	1	1	1	2	62	2	166		740	740	740				female_bins_95_identity___5632
group_10769			1	1	1	2	63	2	167		368	368	368				female_bins_95_identity___5633
group_1077			1	1	1	14	113	14	112		935	935	935	female_bins_95_identity___14468
group_10770	COG1199	Rad3-related DNA helicase DinG (DinG) (PDB:5H8W)	1	1	1	2	64	2	168		2582	2582	2582				female_bins_95_identity___5634
group_10771	COG1925	HPr or related phosphotransfer protein (PtsH) (PDB:1CM2)	1	1	1	2	65	2	169		230	230	230				female_bins_95_identity___5635
group_10772			1	1	1	2	66	2	170		776	776	776				female_bins_95_identity___5636
group_10773	COG4277	Predicted DNA modification or repair protein	1	1	1	2	67	2	171		1301	1301	1301				female_bins_95_identity___5637
group_10774	COG0395	ABC-type glycerol-3-phosphate transport system	1	1	1	2	68	2	172		839	839	839				female_bins_95_identity___5638
group_10775	COG1175	ABC-type sugar transport system	1	1	1	2	69	2	173		878	878	878				female_bins_95_identity___5639
group_10776	COG1653	ABC-type glycerol-3-phosphate transport system	1	1	1	2	70	2	174		1340	1340	1340				female_bins_95_identity___5640
group_10777	COG0366	Glycosidase/amylase (phosphorylase) (AmyA) (PDB:2P67) (PUBMED:29684280)	1	1	1	2	71	2	175		1808	1808	1808				female_bins_95_identity___5641
group_10778	COG1609	DNA-binding transcriptional regulator	1	1	1	2	72	2	176		1016	1016	1016				female_bins_95_identity___5642
group_10779	COG2502	Asparagine synthetase A (AsnA) (PDB:11AS)	1	1	1	2	73	2	177		1010	1010	1010				female_bins_95_identity___5643
group_1078			1	1	1	14	112	14	113		797	797	797	female_bins_95_identity___14469
group_10780	COG0840	Methyl-accepting chemotaxis protein (MCP) (Tar) (PDB:1QU7)	1	1	1	2	74	2	178		1973	1973	1973				female_bins_95_identity___5644
group_10781	COG0493	NADPH-dependent glutamate synthase beta chain or related oxidoreductase (GltD) (PDB:1H7X)	1	1	1	2	75	2	179		1490	1490	1490				female_bins_95_identity___5645
group_10782	COG0067	Glutamate synthase domain 1 (GltB1) (PDB:1EA0)	1	1	1	2	76	2	180		4544	4544	4544				female_bins_95_identity___5646
group_10783	COG1266	Membrane protease YdiL	1	1	1	2	77	2	181		839	839	839				female_bins_95_identity___5647
group_10784	COG0546	Phosphoglycolate phosphatase	1	1	1	2	78	2	182		689	689	689				female_bins_95_identity___5648
group_10785	COG3859	Thiamine transporter ThiT (ThiT) (PDB:4POP)	1	1	1	2	79	2	183		689	689	689				female_bins_95_identity___5649
group_10786	COG0583	DNA-binding transcriptional regulator	1	1	1	2	80	2	184		818	818	818				female_bins_95_identity___5650
group_10787			1	1	1	2	81	2	185		254	254	254				female_bins_95_identity___5651
group_10788	COG3247	Acid resistance membrane protein HdeD	1	1	1	2	82	2	186		590	590	590				female_bins_95_identity___5652
group_10789	COG4767	Glycopeptide antibiotics resistance protein (VanZ)	1	1	1	2	83	2	187		509	509	509				female_bins_95_identity___5653
group_1079	COG1200	RecG-like helicase (RecG) (PDB:1GM5)	1	1	1	14	111	14	114		2108	2108	2108	female_bins_95_identity___14470
group_10790	COG1052	Lactate dehydrogenase or related 2-hydroxyacid dehydrogenase (LdhA) (PDB:1DXY)	1	1	1	2	84	2	188		983	983	983				female_bins_95_identity___5654
group_10791	COG0628	Predicted PurR-regulated permease PerM (PerM)	1	1	1	2	85	2	189		1217	1217	1217				female_bins_95_identity___5655
COG0218		GTP-binding protein EngB required for normal cell division (EngB) (PDB:5UCV)	1	1	1	2	86	2	190		599	599	599				female_bins_95_identity___5656
group_10793	COG0466	ATP-dependent Lon protease	1	1	1	2	87	2	191		2372	2372	2372				female_bins_95_identity___5657
group_10794	COG1219	ATP-dependent protease Clp	1	1	1	2	88	2	192		1184	1184	1184				female_bins_95_identity___5658
group_10795	COG0740	ATP-dependent protease ClpP	1	1	1	2	89	2	193		599	599	599				female_bins_95_identity___5659
group_10796	COG0544	FKBP-type peptidyl-prolyl cis-trans isomerase (trigger factor) (Tig) (PDB:5OWI)	1	1	1	2	90	2	194		1286	1286	1286				female_bins_95_identity___5660
group_10797	COG1120	ABC-type cobalamin/Fe3+-siderophores transport system	1	1	1	2	91	2	195		263	263	263				female_bins_95_identity___5661
group_10798	COG0419	DNA repair exonuclease SbcCD ATPase subunit (SbcC) (PDB:3QKR)	1	1	1	2	92	2	196		1487	1487	1487				female_bins_95_identity___5662
group_10799	COG0715	ABC-type nitrate/sulfonate/bicarbonate transport system	1	1	1	2	93	2	197		1016	1016	1016				female_bins_95_identity___5663
group_1080	COG0535	Radical SAM superfamily maturase	1	1	1	14	110	14	115		1082	1082	1082	female_bins_95_identity___14471
group_10800	COG5852	Small acid-soluble spore protein SspA/SspB/SspC/SspD (alpha/beta-type) (SspA/SspB/SspC/SspD) (PUBMED:3009398	1	1	1	2	94	2	198		200	200	200				female_bins_95_identity___5664
group_10801	COG0693	Protein/nucleotide deglycase	1	1	1	2	95	2	199		545	545	545				female_bins_95_identity___5665
group_10802			1	1	1	2	96	2	200		242	242	242				female_bins_95_identity___5666
COG5464		Recombination-promoting DNA endonuclease RpnC/YadD (RpnC) (PUBMED:28096446)	1	1	1	2	97	2	201		467	467	467				female_bins_95_identity___5667
COG2954		CYTH domain	1	1	1	2	98	2	202		494	494	494				female_bins_95_identity___5668
group_10805	COG2227	2-polyprenyl-3-methyl-5-hydroxy-6-metoxy-1	1	1	1	2	99	2	203		797	797	797				female_bins_95_identity___5669
group_10806	COG1609	DNA-binding transcriptional regulator	1	1	1	2	100	2	204		1037	1037	1037				female_bins_95_identity___5670
COG1640		4-alpha-glucanotransferase (MalQ) (PDB:1CWY)	1	1	1	2	101	2	205		1478	1478	1478				female_bins_95_identity___5671
group_10808	COG3459	Cellobiose phosphorylase (PDB:1V7V) (PUBMED:17307853)	1	1	1	2	102	2	206		3107	3107	3107				female_bins_95_identity___5672
group_10809	COG0647	Ribonucleotide monophosphatase NagD	1	1	1	2	103	2	207		818	818	818				female_bins_95_identity___5673
group_1081			1	1	1	14	109	14	116		575	575	575	female_bins_95_identity___14472
group_10810			1	1	1	2	104	2	208		761	761	761				female_bins_95_identity___5674
group_10811			1	1	1	2	105	2	209		407	407	407				female_bins_95_identity___5675
group_10812	COG1309	DNA-binding protein	1	1	1	2	106	2	210		614	614	614				female_bins_95_identity___5676
group_10813	COG1655	Uncharacterized conserved protein	1	1	1	2	107	2	211		866	866	866				female_bins_95_identity___5677
group_10814	COG0008	Glutamyl- or glutaminyl-tRNA synthetase (GlnS) (PDB:1EUQ)	1	1	1	2	108	2	212		1703	1703	1703				female_bins_95_identity___5678
group_10815			1	1	1	2	109	2	213		476	476	476				female_bins_95_identity___5679
group_10816			1	1	1	2	110	2	214		686	686	686				female_bins_95_identity___5680
group_10817	COG0484	DnaJ-class molecular chaperone with C-terminal Zn finger domain (DnaJ) (PDB:1BQ0)	1	1	1	2	111	2	215		1184	1184	1184				female_bins_95_identity___5681
group_10818	COG0443	Molecular chaperone DnaK (HSP70) (DnaK) (PDB:3I33)	1	1	1	2	112	2	216		1826	1826	1826				female_bins_95_identity___5682
group_10819	COG0534	Na+-driven multidrug efflux pump	1	1	1	2	113	2	217		1382	1382	1382				female_bins_95_identity___5683
group_1082	COG0821	4-hydroxy-3-methylbut-2-en-1-yl diphosphate synthase IspG/GcpE (IspG) (PDB:2Y0F)	1	1	1	14	108	14	117		1508	1508	1508	female_bins_95_identity___14473
group_10820	COG0840	Methyl-accepting chemotaxis protein (MCP) (Tar) (PDB:1QU7)	1	1	1	2	114	2	218		2303	2303	2303				female_bins_95_identity___5684
group_10821	COG0618	nanoRNase/pAp phosphatase	1	1	1	2	115	2	219		920	920	920				female_bins_95_identity___5685
group_10822			1	1	1	2	116	2	220		338	338	338				female_bins_95_identity___5686
group_10823	COG1074	3-5 helicase subunit RecB of the DNA repair enzyme RecBCD (exonuclease V) (RecB) (PDB:3U44) (PUBMED:29901759	1	1	1	2	117	2	221		3818	3818	3818				female_bins_95_identity___5687
group_10824	COG3857	ATP-dependent helicase/DNAse subunit B (AddB) (PDB:3U44)	1	1	1	2	118	2	222		3491	3491	3491				female_bins_95_identity___5688
group_10825			1	1	1	2	119	2	223		287	287	287				female_bins_95_identity___5689
group_10826	COG1464	ABC-type metal ion transport system	1	1	1	2	120	2	224		857	857	857				female_bins_95_identity___5690
COG2011		ABC-type methionine transport system	1	1	1	2	121	2	225		662	662	662				female_bins_95_identity___5691
group_10828	COG1135	ABC-type methionine transport system	1	1	1	2	122	2	226		1037	1037	1037				female_bins_95_identity___5692
group_10829			1	1	1	2	123	2	227		101	101	101				female_bins_95_identity___5693
group_1083			1	1	1	14	107	14	118		623	623	623	female_bins_95_identity___14474
group_10830	COG0031	Cysteine synthase (CysK) (PDB:1FCJ)	1	1	1	2	124	2	228		941	941	941				female_bins_95_identity___5694
group_10831	COG0058	Glucan phosphorylase (GlgP) (PDB:1A8I)	1	1	1	2	125	2	229		2309	2309	2309				female_bins_95_identity___5695
group_10832	COG1609	DNA-binding transcriptional regulator	1	1	1	2	126	2	230		989	989	989				female_bins_95_identity___5696
group_10833	COG0642	Signal transduction histidine kinase (BaeS) (PDB:1JOY)	1	1	1	2	127	2	231		2684	2684	2684				female_bins_95_identity___5697
group_10834	COG0642	Signal transduction histidine kinase (BaeS) (PDB:1JOY)	1	1	1	2	128	2	232		2819	2819	2819				female_bins_95_identity___5698
group_10835	COG3437	Response regulator c-di-GMP phosphodiesterase	1	1	1	2	129	2	104		1073	1073	1073				female_bins_95_identity___5699
group_10836	COG3459	Cellobiose phosphorylase (PDB:1V7V) (PUBMED:17307853)	1	1	1	2	130	2	103		2735	2735	2735				female_bins_95_identity___5700
group_10837	COG0205	6-phosphofructokinase (PfkA) (PDB:1KZH)	1	1	1	2	131	2	102		1232	1232	1232				female_bins_95_identity___5701
group_10838	COG0530	Ca2+/Na+ antiporter (ECM27) (PDB:3V5S)	1	1	1	2	132	2	101		941	941	941				female_bins_95_identity___5702
group_10839			1	1	1	2	133	2	100		944	944	944				female_bins_95_identity___5703
group_1084	COG3250	Beta-galactosidase/beta-glucuronidase (LacZ) (PDB:5N6U) (PUBMED:19291314)	1	1	1	14	106	14	119		2024	2024	2024	female_bins_95_identity___14475
group_10840	COG0534	Na+-driven multidrug efflux pump	1	1	1	2	134	2	99		1412	1412	1412				female_bins_95_identity___5704
group_10841	COG1744	Lipoprotein Med	1	1	1	2	135	2	98		1934	1934	1934				female_bins_95_identity___5705
group_10842	COG2129	Predicted phosphoesterase	1	1	1	2	136	2	97		698	698	698				female_bins_95_identity___5706
group_10843	COG1246	N-acetylglutamate synthase or related acetyltransferase	1	1	1	2	137	2	96		521	521	521				female_bins_95_identity___5707
group_10844	COG4200	Predicted lantabiotic-exporting membrane pepmease	1	1	1	2	138	2	95		782	782	782				female_bins_95_identity___5708
group_10845	COG1131	ABC-type multidrug transport system	1	1	1	2	139	2	94		866	866	866				female_bins_95_identity___5709
group_10846			1	1	1	2	140	2	93		443	443	443				female_bins_95_identity___5710
group_10847	COG3279	DNA-binding response regulator	1	1	1	2	141	2	92		440	440	440				female_bins_95_identity___5711
group_10848	COG1653	ABC-type glycerol-3-phosphate transport system	1	1	1	2	142	2	91		2378	2378	2378				female_bins_95_identity___5712
group_10849	COG0745	DNA-binding response regulator	1	1	1	2	143	2	90		677	677	677				female_bins_95_identity___5713
group_1085	COG1286	Colicin V production accessory protein CvpA	1	1	1	14	105	14	120		494	494	494	female_bins_95_identity___14476
group_10850	COG0642	Signal transduction histidine kinase (BaeS) (PDB:1JOY)	1	1	1	2	144	2	89		1406	1406	1406				female_bins_95_identity___5714
group_10851	COG0534	Na+-driven multidrug efflux pump	1	1	1	2	145	2	88		1358	1358	1358				female_bins_95_identity___5715
group_10852	COG1073	Fermentation-respiration switch esterase FrsA	1	1	1	2	232	2	87		209	209	209				female_bins_95_identity___5716
COG4925		Uncharacterized conserved protein	1	1	1	2	231	2	86		605	605	605				female_bins_95_identity___5717
group_10854	COG0655	Multimeric flavodoxin WrbA	1	1	1	2	230	2	85		287	287	287				female_bins_95_identity___5718
group_10855			1	1	1	2	229	2	84		872	872	872				female_bins_95_identity___5719
group_10856			1	1	1	2	228	2	83		230	230	230				female_bins_95_identity___5720
group_10857			1	1	1	2	227	2	82		626	626	626				female_bins_95_identity___5721
group_10858	COG4591	ABC-type transport system involved in lipoprotein release	1	1	1	2	226	2	81		2348	2348	2348				female_bins_95_identity___5722
group_10859	COG1136	ABC-type lipoprotein export system	1	1	1	2	225	2	80		761	761	761				female_bins_95_identity___5723
group_1086	COG1162	Ribosome biogenesis GTPase RsgA (RsgA) (PDB:1T9H)	1	1	1	14	104	14	121		923	923	923	female_bins_95_identity___14477
group_10860			1	1	1	2	224	2	79		206	206	206				female_bins_95_identity___5724
group_10861	COG3049	Penicillin V acylase or related amidase	1	1	1	2	223	2	78		1118	1118	1118				female_bins_95_identity___5725
group_10862	COG0583	DNA-binding transcriptional regulator	1	1	1	2	222	2	77		884	884	884				female_bins_95_identity___5726
group_10863	COG1396	Transcriptional regulator	1	1	1	2	221	2	76		668	668	668				female_bins_95_identity___5727
group_10864	COG0622	Predicted phosphodiesterase	1	1	1	2	220	2	75		482	482	482				female_bins_95_identity___5728
group_10865	COG0127	Inosine/xanthosine triphosphate pyrophosphatase	1	1	1	2	219	2	74		602	602	602				female_bins_95_identity___5729
group_10866	COG0860	N-acetylmuramoyl-L-alanine amidase (AmiC) (PDB:1JWQ)	1	1	1	2	218	2	73		1115	1115	1115				female_bins_95_identity___5730
group_10867	COG0116	23S rRNA G2445 N2-methylase RlmL (RlmL) (PDB:3V97) (PUBMED:22362734)	1	1	1	2	217	2	72		1154	1154	1154				female_bins_95_identity___5731
group_10868	COG5297	Cellulase/cellobiase CelA1 (CelA1)	1	1	1	2	216	2	71		1850	1850	1850				female_bins_95_identity___5732
group_10869			1	1	1	2	215	2	70		158	158	158				female_bins_95_identity___5733
group_1087	COG0566	tRNA G18 (ribose-2'-O)-methylase SpoU (SpoU) (PDB:1GZ0)	1	1	1	14	103	14	122		674	674	674	female_bins_95_identity___14478
group_10870	COG4709	Uncharacterized membrane protein	1	1	1	2	214	2	69		455	455	455				female_bins_95_identity___5734
group_10871			1	1	1	2	213	2	68		398	398	398				female_bins_95_identity___5735
group_10872	COG0395	ABC-type glycerol-3-phosphate transport system	1	1	1	2	212	2	67		869	869	869				female_bins_95_identity___5736
group_10873	COG1175	ABC-type sugar transport system	1	1	1	2	211	2	66		1010	1010	1010				female_bins_95_identity___5737
group_10874	COG1653	ABC-type glycerol-3-phosphate transport system	1	1	1	2	210	2	65		1427	1427	1427				female_bins_95_identity___5738
group_10875	COG1609	DNA-binding transcriptional regulator	1	1	1	2	209	2	64		1013	1013	1013				female_bins_95_identity___5739
group_10876	COG3459	Cellobiose phosphorylase (PDB:1V7V) (PUBMED:17307853)	1	1	1	2	208	2	63		2435	2435	2435				female_bins_95_identity___5740
group_10877	COG0789	DNA-binding transcriptional regulator	1	1	1	2	207	2	62		833	833	833				female_bins_95_identity___5741
group_10878	COG0535	Radical SAM superfamily maturase	1	1	1	2	206	2	61		605	605	605				female_bins_95_identity___5742
group_10879	COG2240	Pyridoxal/pyridoxine/pyridoxamine kinase (PdxK) (PDB:5ZW9) (PUBMED:19096365	1	1	1	2	205	2	60		824	824	824				female_bins_95_identity___5743
group_1088	COG4992	Acetylornithine/succinyldiaminopimelate/putrescine aminotransferase (ArgD) (PDB:2E54)	1	1	1	14	102	14	123		1205	1205	1205	female_bins_95_identity___14479
group_10880	COG0840	Methyl-accepting chemotaxis protein (MCP) (Tar) (PDB:1QU7)	1	1	1	2	204	2	59		1700	1700	1700				female_bins_95_identity___5744
group_10881	COG0840	Methyl-accepting chemotaxis protein (MCP) (Tar) (PDB:1QU7)	1	1	1	2	203	2	58		1703	1703	1703				female_bins_95_identity___5745
group_10882			1	1	1	2	202	2	57		533	533	533				female_bins_95_identity___5746
group_10883	COG3264	Small-conductance mechanosensitive channel MscK (MscK)	1	1	1	2	201	2	56		1190	1190	1190				female_bins_95_identity___5747
group_10884	COG1309	DNA-binding protein	1	1	1	2	200	2	55		566	566	566				female_bins_95_identity___5748
group_10885			1	1	1	2	199	2	54		1169	1169	1169				female_bins_95_identity___5749
group_10886	COG0393	Uncharacterized pentameric protein YbjQ	1	1	1	2	198	2	53		314	314	314				female_bins_95_identity___5750
group_10887			1	1	1	2	197	2	52		236	236	236				female_bins_95_identity___5751
group_10888	COG4877	Uncharacterized conserved protein	1	1	1	2	196	2	51		203	203	203				female_bins_95_identity___5752
group_10889	COG0330	Regulator of protease activity HflC	1	1	1	2	195	2	50		1028	1028	1028				female_bins_95_identity___5753
group_1089	COG0648	Endonuclease IV (Nfo) (PDB:2NQH)	1	1	1	14	101	14	124		848	848	848	female_bins_95_identity___14480
group_10890			1	1	1	2	194	2	49		176	176	176				female_bins_95_identity___5754
group_10891	COG1725	DNA-binding transcriptional regulator YhcF	1	1	1	2	193	2	48		377	377	377				female_bins_95_identity___5755
group_10892	COG1131	ABC-type multidrug transport system	1	1	1	2	192	2	47		866	866	866				female_bins_95_identity___5756
group_10893			1	1	1	2	191	2	46		644	644	644				female_bins_95_identity___5757
group_10894			1	1	1	2	190	2	45		614	614	614				female_bins_95_identity___5758
group_10895			1	1	1	2	189	2	44		803	803	803				female_bins_95_identity___5759
group_10896			1	1	1	2	188	2	43		1397	1397	1397				female_bins_95_identity___5760
group_10897	COG3867	Arabinogalactan endo-1	1	1	1	2	187	2	42		1025	1025	1025				female_bins_95_identity___5761
group_10898	COG3833	ABC-type maltose transport system	1	1	1	2	186	2	41		878	878	878				female_bins_95_identity___5762
group_10899	COG1175	ABC-type sugar transport system	1	1	1	2	185	2	40		911	911	911				female_bins_95_identity___5763
group_1090			1	1	1	14	100	14	125		1157	1157	1157	female_bins_95_identity___14481
group_10900	COG2182	Maltose-binding periplasmic protein MalE (MalE) (PDB:1T0K)	1	1	1	2	184	2	39		1337	1337	1337				female_bins_95_identity___5764
group_10901	COG1609	DNA-binding transcriptional regulator	1	1	1	2	183	2	38		989	989	989				female_bins_95_identity___5765
group_10902			1	1	1	2	182	2	37		170	170	170				female_bins_95_identity___5766
group_10903	COG0745	DNA-binding response regulator	1	1	1	2	181	2	36		668	668	668				female_bins_95_identity___5767
group_10904	COG5002	Sensor histidine kinase WalK (WalK) (PDB:4I5S)	1	1	1	2	180	2	35		1076	1076	1076				female_bins_95_identity___5768
group_10905			1	1	1	2	179	2	34		152	152	152				female_bins_95_identity___5769
group_10906	COG1131	ABC-type multidrug transport system	1	1	1	2	178	2	33		848	848	848				female_bins_95_identity___5770
group_10907			1	1	1	2	177	2	32		992	992	992				female_bins_95_identity___5771
group_10908			1	1	1	2	176	2	31		1013	1013	1013				female_bins_95_identity___5772
group_10909	COG1011	FMN and 5-amino-6-(5-phospho-D-ribitylamino)uracil phosphatase YigB	1	1	1	2	175	2	30		179	179	179				female_bins_95_identity___5773
group_1091	COG0793	C-terminal processing protease CtpA/Prc	1	1	1	14	99	14	41		1781	1781	1781	female_bins_95_identity___14482
group_10910	COG0456	Ribosomal protein S18 acetylase RimI and related acetyltransferases (RimI) (PDB:1GHE)	1	1	1	2	174	2	29		434	434	434				female_bins_95_identity___5774
COG1476		DNA-binding transcriptional regulator	1	1	1	2	173	2	28		221	221	221				female_bins_95_identity___5775
group_10912			1	1	1	2	172	2	27		317	317	317				female_bins_95_identity___5776
group_10913			1	1	1	2	171	2	26		515	515	515				female_bins_95_identity___5777
group_10914	COG0366	Glycosidase/amylase (phosphorylase) (AmyA) (PDB:2P67) (PUBMED:29684280)	1	1	1	2	170	2	25		1871	1871	1871				female_bins_95_identity___5778
group_10915	COG3345	Alpha-galactosidase (GalA) (PDB:2XN0)	1	1	1	2	169	2	24		2186	2186	2186				female_bins_95_identity___5779
group_10916	COG0395	ABC-type glycerol-3-phosphate transport system	1	1	1	2	168	2	23		842	842	842				female_bins_95_identity___5780
group_10917	COG1175	ABC-type sugar transport system	1	1	1	2	167	2	22		872	872	872				female_bins_95_identity___5781
group_10918	COG1653	ABC-type glycerol-3-phosphate transport system	1	1	1	2	166	2	21		1376	1376	1376				female_bins_95_identity___5782
group_10919	COG2207	AraC-type DNA-binding domain and AraC-containing proteins (AraC) (PDB:1BL0)	1	1	1	2	165	2	20		860	860	860				female_bins_95_identity___5783
group_1092			1	1	1	14	98	14	40		413	413	413	female_bins_95_identity___14483
group_10920			1	1	1	2	164	2	19		1196	1196	1196				female_bins_95_identity___5784
group_10921	COG0375	Hydrogenase maturation factor HypA/HybF	1	1	1	2	163	2	18		344	344	344				female_bins_95_identity___5785
group_10922	COG0493	NADPH-dependent glutamate synthase beta chain or related oxidoreductase (GltD) (PDB:1H7X)	1	1	1	2	162	2	17		2786	2786	2786				female_bins_95_identity___5786
COG0378		Hydrogenase/urease maturation factor HypB	1	1	1	2	161	2	16		671	671	671				female_bins_95_identity___5787
group_10924			1	1	1	2	160	2	15		596	596	596				female_bins_95_identity___5788
group_10925			1	1	1	2	159	2	14		440	440	440				female_bins_95_identity___5789
group_10926			1	1	1	2	158	2	13		719	719	719				female_bins_95_identity___5790
group_10927	COG0642	Signal transduction histidine kinase (BaeS) (PDB:1JOY)	1	1	1	2	157	2	12		896	896	896				female_bins_95_identity___5791
group_10928			1	1	1	2	156	2	11		806	806	806				female_bins_95_identity___5792
group_10929	COG1131	ABC-type multidrug transport system	1	1	1	2	155	2	10		938	938	938				female_bins_95_identity___5793
group_1093	COG0274	Deoxyribose-phosphate aldolase (DeoC) (PDB:1J2W)	1	1	1	14	97	14	39		878	878	878	female_bins_95_identity___14484
group_10930	COG0745	DNA-binding response regulator	1	1	1	2	154	2	9		677	677	677				female_bins_95_identity___5794
group_10931			1	1	1	2	153	2	8		767	767	767				female_bins_95_identity___5795
group_10932	COG0494	8-oxo-dGTP pyrophosphatase MutT and related house-cleaning NTP pyrophosphohydrolases	1	1	1	2	152	2	7		653	653	653				female_bins_95_identity___5796
group_10933			1	1	1	2	151	2	6		821	821	821				female_bins_95_identity___5797
group_10934			1	1	1	2	150	2	5		734	734	734				female_bins_95_identity___5798
group_10935	COG1653	ABC-type glycerol-3-phosphate transport system	1	1	1	2	149	2	4		1613	1613	1613				female_bins_95_identity___5799
group_10936	COG0395	ABC-type glycerol-3-phosphate transport system	1	1	1	2	148	2	3		944	944	944				female_bins_95_identity___5800
group_10937	COG1175	ABC-type sugar transport system	1	1	1	2	147	2	2		905	905	905				female_bins_95_identity___5801
group_10938	COG3839	ABC-type sugar transport system	1	1	1	2	146	2	1		1100	1100	1100				female_bins_95_identity___5802
group_10939	COG1396	Transcriptional regulator	1	1	1	386	6019	386	2462		314	314	314				female_bins_95_identity___6315
group_1094	COG5010	Flp pilus assembly protein TadD	1	1	1	14	96	14	38		1748	1748	1748	female_bins_95_identity___14485
group_10940			1	1	1	386	6020	386	2463		248	248	248				female_bins_95_identity___6316
group_10941			1	1	1	386	6021	386	2464		338	338	338				female_bins_95_identity___6317
group_10942			1	1	1	386	6022	386	2465		677	677	677				female_bins_95_identity___6318
group_10943			1	1	1	386	6023	386	2466		680	680	680				female_bins_95_identity___6319
group_10944			1	1	1	386	6024	386	2467		170	170	170				female_bins_95_identity___6320
group_10945	COG1961	Site-specific DNA recombinase SpoIVCA/DNA invertase PinE (SpoIVCA) (PDB:1GDT)	1	1	1	386	6025	386	2468		1571	1571	1571				female_bins_95_identity___6321
group_10946	COG3546	Mn-containing catalase (includes spore coat protein CotJC) (CotJC) (PDB:1JKU) (PUBMED:20434458)	1	1	1	386	6026	386	2469		428	428	428				female_bins_95_identity___6322
group_10947	COG5883	Spore coat protein CotJB (CotJB) (PUBMED:7768848)	1	1	1	386	6027	386	2470		275	275	275				female_bins_95_identity___6323
group_10948			1	1	1	386	6028	386	2471		170	170	170				female_bins_95_identity___6324
group_10949	COG1131	ABC-type multidrug transport system	1	1	1	386	6029	386	2472		1001	1001	1001				female_bins_95_identity___6325
group_1095	COG1185	Polyribonucleotide nucleotidyltransferase (polynucleotide phosphorylase) (Pnp) (PDB:1E3P)	1	1	1	14	95	14	37		2198	2198	2198	female_bins_95_identity___14486
group_10950	COG1277	ABC-type transport system involved in multi-copper enzyme maturation	1	1	1	386	6030	386	2473		2108	2108	2108				female_bins_95_identity___6326
group_10951			1	1	1	386	6031	386	2474		158	158	158				female_bins_95_identity___6327
group_10952	COG1148	Heterodisulfide reductase	1	1	1	386	6032	386	2475		1481	1481	1481				female_bins_95_identity___6328
group_10953	COG0008	Glutamyl- or glutaminyl-tRNA synthetase (GlnS) (PDB:1EUQ)	1	1	1	386	6033	386	2476		1454	1454	1454				female_bins_95_identity___6329
group_10954	COG0210	Superfamily I DNA or RNA helicase (UvrD) (PDB:6PPR)	1	1	1	386	6034	386	2477		1856	1856	1856				female_bins_95_identity___6330
group_10955	COG3906	Uncharacterized conserved protein YrzB	1	1	1	386	6035	386	2478		377	377	377				female_bins_95_identity___6331
group_10956	COG1523	Pullulanase/glycogen debranching enzyme (PulA) (PDB:2WSK)	1	1	1	386	6036	386	2479		1943	1943	1943				female_bins_95_identity___6332
group_10957			1	1	1	386	6037	386	2480		536	536	536				female_bins_95_identity___6333
group_10958			1	1	1	386	6038	386	2481		329	329	329				female_bins_95_identity___6334
group_10959	COG0180	Tryptophanyl-tRNA synthetase (TrpS) (PDB:3N9I)	1	1	1	386	6039	386	2482		1004	1004	1004				female_bins_95_identity___6335
group_1096	COG0184	Ribosomal protein S15P/S13E (RpsO) (PDB:4V4H)	1	1	1	14	94	14	36		272	272	272	female_bins_95_identity___14487
group_10960	COG0406	Broad specificity phosphatase PhoE (PhoE) (PDB:1EBB)	1	1	1	386	6040	386	2483		731	731	731				female_bins_95_identity___6336
group_10961	COG0330	Regulator of protease activity HflC	1	1	1	386	6041	386	2484		1037	1037	1037				female_bins_95_identity___6337
group_10962	COG0330	Regulator of protease activity HflC	1	1	1	386	6042	386	2485		1043	1043	1043				female_bins_95_identity___6338
group_10963			1	1	1	386	6043	386	2486		857	857	857				female_bins_95_identity___6339
group_10964	COG3063	Type IV pilus assembly protein PilF/PilW (PilF) (PDB:2VQ2) (PUBMED:16403447)	1	1	1	386	6044	386	2487		938	938	938				female_bins_95_identity___6340
group_10965	COG5341	Uncharacterized conserved protein (PDB:2KPP)	1	1	1	386	6045	386	2488		491	491	491				female_bins_95_identity___6341
COG4769		Uncharacterized membrane protein	1	1	1	386	6046	386	2489		494	494	494				female_bins_95_identity___6342
group_10967	COG0632	Holliday junction resolvasome RuvABC DNA-binding subunit (RuvA) (PDB:1BDX)	1	1	1	386	6047	386	2490		608	608	608				female_bins_95_identity___6343
group_10968	COG2255	Holliday junction resolvasome RuvABC	1	1	1	386	6048	386	2491		998	998	998				female_bins_95_identity___6344
COG3027		Cell division protein ZapA	1	1	1	386	6049	386	2492		407	407	407				female_bins_95_identity___6345
group_1097	COG1477	FAD:protein FMN transferase ApbE (ApbE) (PDB:1VRM) (PUBMED:23558683	1	1	1	14	93	14	35		1016	1016	1016	female_bins_95_identity___14488
group_10970	COG0826	23S rRNA C2501 and tRNA U34 5'-hydroxylation protein RlhA/YrrN/YrrO	1	1	1	386	6050	386	2493		2309	2309	2309				female_bins_95_identity___6346
group_10971	COG0772	Peptodoglycan polymerase FtsW/RodA/SpoVE (FtsW) (PDB:6BAR) (PUBMED:30692671)	1	1	1	386	6051	386	2494		1406	1406	1406				female_bins_95_identity___6347
group_10972	COG0768	Cell division protein FtsI	1	1	1	386	6052	386	2495		1466	1466	1466				female_bins_95_identity___6348
group_10973	COG1051	ADP-ribose pyrophosphatase YjhB	1	1	1	386	6053	386	2496		449	449	449				female_bins_95_identity___6349
group_10974	COG1302	Uncharacterized conserved protein YloU	1	1	1	386	6054	386	2497		359	359	359				female_bins_95_identity___6350
COG1461		Predicted kinase related to dihydroxyacetone kinase (YloV)	1	1	1	386	6055	386	2498		1691	1691	1691				female_bins_95_identity___6351
group_10976	COG1200	RecG-like helicase (RecG) (PDB:1GM5)	1	1	1	386	6056	386	2499		2045	2045	2045				female_bins_95_identity___6352
group_10977	COG1307	Fatty acid-binding protein DegV (function unknown) (DegV) (PDB:1MGP)	1	1	1	386	6057	386	2500		860	860	860				female_bins_95_identity___6353
COG3711		Transcriptional antiterminator (BglG) (PDB:1AUU)	1	1	1	386	6058	386	2501		839	839	839				female_bins_95_identity___6354
COG2190		Phosphotransferase system IIA component (NagE) (PDB:1AX3)	1	1	1	386	6059	386	2502		488	488	488				female_bins_95_identity___6355
group_1098	COG1597	Phosphatidylglycerol kinase	1	1	1	14	92	14	34		866	866	866	female_bins_95_identity___14489
group_10980	COG1080	Phosphoenolpyruvate-protein kinase (PTS system EI component in bacteria) (PtsA) (PDB:1EZA)	1	1	1	386	6060	386	2503		1619	1619	1619				female_bins_95_identity___6356
group_10981	COG1925	HPr or related phosphotransfer protein (PtsH) (PDB:1CM2)	1	1	1	386	6061	386	2504		257	257	257				female_bins_95_identity___6357
group_10982	COG1263	Phosphotransferase system IIC components	1	1	1	386	6062	386	2505		1469	1469	1469				female_bins_95_identity___6358
group_10983	COG0363	6-phosphogluconolactonase/Glucosamine-6-phosphate isomerase/deaminase (NagB) (PDB:2RI0) (PUBMED:24163345)	1	1	1	386	6063	386	2506		725	725	725				female_bins_95_identity___6359
group_10984	COG1820	N-acetylglucosamine-6-phosphate deacetylase (NagA) (PDB:1O12)	1	1	1	386	6064	386	2507		1136	1136	1136				female_bins_95_identity___6360
group_10985	COG0621	tRNA A37 methylthiotransferase MiaB (MiaB) (PDB:4JC0) (PUBMED:17407324	1	1	1	386	6065	386	2508		1505	1505	1505				female_bins_95_identity___6361
group_10986	COG0249	DNA mismatch repair ATPase MutS (MutS) (PDB:1E3M)	1	1	1	386	6066	386	2509		2651	2651	2651				female_bins_95_identity___6362
group_10987	COG0323	DNA mismatch repair ATPase MutL (MutL) (PDB:1B62)	1	1	1	386	6067	386	2510		1898	1898	1898				female_bins_95_identity___6363
group_10988	COG0324	tRNA A37 N6-isopentenylltransferase MiaA (MiaA) (PDB:2ZM5)	1	1	1	386	6068	386	2511		1001	1001	1001				female_bins_95_identity___6364
group_10989	COG4100	Cystathionine beta-lyase family protein involved in aluminum resistance (YnbB) (PDB:3FD0)	1	1	1	386	6069	386	2512		1343	1343	1343				female_bins_95_identity___6365
group_1099	COG2207	AraC-type DNA-binding domain and AraC-containing proteins (AraC) (PDB:1BL0)	1	1	1	14	91	14	33		917	917	917	female_bins_95_identity___14490
COG2003		DNA repair protein RadC	1	1	1	386	6070	386	2513		707	707	707				female_bins_95_identity___6366
group_10991	COG1077	Cell shape-determining ATPase MreB	1	1	1	386	6071	386	2514		1010	1010	1010				female_bins_95_identity___6367
group_10992	COG1792	Cell shape-determining protein MreC (MreC) (PDB:2J5U)	1	1	1	386	6072	386	2515		869	869	869				female_bins_95_identity___6368
group_10993	COG2891	Cell shape-determining protein MreD (MreD)	1	1	1	386	6073	386	2516		518	518	518				female_bins_95_identity___6369
group_10994	COG0768	Cell division protein FtsI	1	1	1	386	6074	386	2517		2882	2882	2882				female_bins_95_identity___6370
COG0850		Septum site-determining protein MinC (MinC) (PDB:1HF2)	1	1	1	386	6075	386	2518		680	680	680				female_bins_95_identity___6371
group_10996	COG2894	Septum site-determining ATPase MinD (MinD) (PDB:4V02)	1	1	1	386	6076	386	2519		791	791	791				female_bins_95_identity___6372
group_10997	COG0851	Septum formation topological specificity factor MinE (MinE) (PDB:1EV0)	1	1	1	386	6077	386	2520		272	272	272				female_bins_95_identity___6373
COG0772		Peptodoglycan polymerase FtsW/RodA/SpoVE (FtsW) (PDB:6BAR) (PUBMED:30692671)	1	1	1	386	6078	386	2521		1103	1103	1103				female_bins_95_identity___6374
group_10999	COG1803	Methylglyoxal synthase (MgsA) (PDB:1S8A) (PUBMED:9665712)	1	1	1	386	6079	386	2522		395	395	395				female_bins_95_identity___6375
group_11			1	1	1	393	78	393	50		185	185	185		female_bins_95_identity___11548
group_110	COG3598	RecA-family ATPase (RepA)	1	1	1	28	4	28	2		977	977	977		female_bins_95_identity___6181
group_1100	COG1866	Phosphoenolpyruvate carboxykinase	1	1	1	14	90	14	32		1610	1610	1610	female_bins_95_identity___14491
group_11000	COG1686	D-alanyl-D-alanine carboxypeptidase (DacC) (PDB:1HD8)	1	1	1	386	6080	386	2523		986	986	986				female_bins_95_identity___6376
group_11001			1	1	1	386	6081	386	2524		419	419	419				female_bins_95_identity___6377
group_11002			1	1	1	386	6082	386	2525		1409	1409	1409				female_bins_95_identity___6378
group_11003	COG0325	Pyridoxal 5'-phosphate homeostasis protein YggS	1	1	1	386	6083	386	2526		695	695	695				female_bins_95_identity___6379
group_11004	COG1799	Cell division protein SepF/YlmF	1	1	1	386	6084	386	2527		494	494	494				female_bins_95_identity___6380
group_11005	COG0337	3-dehydroquinate synthetase (AroB) (PDB:3ZOK)	1	1	1	386	6085	386	2528		1109	1109	1109				female_bins_95_identity___6381
group_11006	COG0597	Lipoprotein signal peptidase (LspA) (PDB:5DIR)	1	1	1	386	6086	386	2529		548	548	548				female_bins_95_identity___6382
group_11007	COG0564	Pseudouridine synthase RluA	1	1	1	386	6087	386	2530		917	917	917				female_bins_95_identity___6383
group_11008			1	1	1	386	6088	386	2531		593	593	593				female_bins_95_identity___6384
group_11009	COG1966	Carbon starvation protein CstA (peptide/pyruvate transporter) (CstA) (PUBMED:26497384	1	1	1	386	6089	386	2532		1652	1652	1652				female_bins_95_identity___6385
group_1101			1	1	1	14	89	14	31		500	500	500	female_bins_95_identity___14492
group_11010	COG1102	Cytidylate kinase (CmkB)	1	1	1	386	6090	386	2533		635	635	635				female_bins_95_identity___6386
group_11011	COG4974	Site-specific recombinase XerD (XerD) (PDB:1A0P)	1	1	1	386	6091	386	2534		1082	1082	1082				female_bins_95_identity___6387
group_11012	COG0037	tRNA(Ile)-lysidine synthase TilS/MesJ (TilS) (PDB:1NI5) (PUBMED:21435031)	1	1	1	386	6092	386	2535		719	719	719				female_bins_95_identity___6388
group_11013	COG0628	Predicted PurR-regulated permease PerM (PerM)	1	1	1	386	6093	386	2536		1319	1319	1319				female_bins_95_identity___6389
group_11014	COG1490	D-aminoacyl-tRNA deacylase (Dtd) (PDB:1J7G) (PUBMED:10918062	1	1	1	386	6094	386	2537		476	476	476				female_bins_95_identity___6390
group_11015			1	1	1	386	6095	386	2538		239	239	239				female_bins_95_identity___6391
group_11016			1	1	1	386	6096	386	2539		374	374	374				female_bins_95_identity___6392
group_11017	COG1974	SOS-response transcriptional repressor LexA (RecA-mediated autopeptidase) (LexA) (PDB:1AY9)	1	1	1	386	6097	386	2540		617	617	617				female_bins_95_identity___6393
group_11018	COG2155	Uncharacterized membrane protein YuzA	1	1	1	386	6098	386	2541		260	260	260				female_bins_95_identity___6394
group_11019	COG0799	Ribosomal silencing factor RsfS	1	1	1	386	6099	386	2542		347	347	347				female_bins_95_identity___6395
group_1102	COG0635	Coproporphyrinogen-III oxidase HemN (oxygen-independent) or related Fe-S oxidoreductase (HemN) (PDB:1OLT)	1	1	1	14	88	14	30		1028	1028	1028	female_bins_95_identity___14493
COG1713		Diadenosine tetraphosphatase YqeK or a related HD superfamily phosphohydrolase (YqeK) (PDB:2OGI) (PUBMED:32152217)	1	1	1	386	6100	386	2543		575	575	575				female_bins_95_identity___6396
group_11021	COG1057	Nicotinate-nucleotide adenylyltransferase NadD (NadD) (PDB:1YUM)	1	1	1	386	6101	386	2544		611	611	611				female_bins_95_identity___6397
group_11022	COG1534	RNA-binding protein YhbY (YhbY) (PDB:1JO0)	1	1	1	386	6102	386	2545		287	287	287				female_bins_95_identity___6398
group_11023	COG0536	GTPase involved in cell partioning and DNA repair (Obg) (PDB:1LNZ)	1	1	1	386	6103	386	2546		1298	1298	1298				female_bins_95_identity___6399
group_11024	COG0211	Ribosomal protein L27 (RpmA) (PDB:1VS6)	1	1	1	386	6104	386	2547		287	287	287				female_bins_95_identity___6400
COG2868		Uncharacterized conserved protein YsxB	1	1	1	386	6105	386	2548		329	329	329				female_bins_95_identity___6401
group_11026	COG0261	Ribosomal protein L21 (RplU) (PDB:1VS6)	1	1	1	386	6106	386	2549		305	305	305				female_bins_95_identity___6402
group_11027	COG2816	NADH pyrophosphatase NudC	1	1	1	386	6107	386	2550		554	554	554				female_bins_95_identity___6403
COG1530		Ribonuclease G or E (CafA) (PDB:1SLJ)	1	1	1	386	6108	386	2551		1268	1268	1268				female_bins_95_identity___6404
group_11029	COG5011	Uncharacterized conserved protein	1	1	1	386	6109	386	2552		776	776	776				female_bins_95_identity___6405
group_1103	COG0058	Glucan phosphorylase (GlgP) (PDB:1A8I)	1	1	1	14	87	14	29		4250	4250	4250	female_bins_95_identity___14494
group_11030	COG1032	Radical SAM superfamily enzyme YgiQ	1	1	1	386	6110	386	2553		1916	1916	1916				female_bins_95_identity___6406
group_11031			1	1	1	386	6111	386	2554		455	455	455				female_bins_95_identity___6407
group_11032	COG0107	Imidazole glycerol phosphate synthase subunit HisF (HisF) (PDB:1OX4)	1	1	1	386	6112	386	2555		1280	1280	1280				female_bins_95_identity___6408
group_11033	COG0131	Imidazoleglycerol phosphate dehydratase HisB (HisB2) (PDB:1RHY)	1	1	1	386	6113	386	2556		590	590	590				female_bins_95_identity___6409
group_11034	COG0141	Histidinol dehydrogenase (HisD) (PDB:1K75)	1	1	1	386	6114	386	2557		1292	1292	1292				female_bins_95_identity___6410
group_11035	COG2859	Outer membrane channel-forming protein BP26/OMP28	1	1	1	386	6115	386	2558		884	884	884				female_bins_95_identity___6411
COG0040		ATP phosphoribosyltransferase (HisG) (PDB:1H3D)	1	1	1	386	6116	386	2559		647	647	647				female_bins_95_identity___6412
group_11037	COG3705	ATP phosphoribosyltransferase regulatory subunit HisZ (HisZ) (PDB:3OD1) (PUBMED:9767141)	1	1	1	386	6117	386	2560		1118	1118	1118				female_bins_95_identity___6413
group_11038	COG3331	Penicillin-binding protein-related factor A	1	1	1	386	6118	386	2561		536	536	536				female_bins_95_identity___6414
group_11039	COG0564	Pseudouridine synthase RluA	1	1	1	386	6119	386	2562		1016	1016	1016				female_bins_95_identity___6415
group_1104	COG3408	Glycogen debranching enzyme (alpha-1	1	1	1	14	86	14	28		2075	2075	2075	female_bins_95_identity___14495
group_11040			1	1	1	386	6120	386	2563		569	569	569				female_bins_95_identity___6416
group_11041	COG0300	Short-chain dehydrogenase (YqjQ)	1	1	1	386	6121	386	2564		752	752	752				female_bins_95_identity___6417
group_11042	COG1032	Radical SAM superfamily enzyme YgiQ	1	1	1	386	6122	386	2565		1934	1934	1934				female_bins_95_identity___6418
group_11043	COG0637	Beta-phosphoglucomutase	1	1	1	386	6123	386	2566		1394	1394	1394				female_bins_95_identity___6419
group_11044	COG3314	Spore dipicolinate transporter SpoVV/YjiH/YlbJ	1	1	1	386	6124	386	2567		953	953	953				female_bins_95_identity___6420
group_11045	COG0860	N-acetylmuramoyl-L-alanine amidase (AmiC) (PDB:1JWQ)	1	1	1	386	6125	386	2568		1517	1517	1517				female_bins_95_identity___6421
group_11046			1	1	1	386	6126	386	2569		620	620	620				female_bins_95_identity___6422
group_11047	COG0669	Phosphopantetheine adenylyltransferase (CoaD) (PDB:3F3M)	1	1	1	386	6127	386	2570		494	494	494				female_bins_95_identity___6423
group_11048	COG0742	16S rRNA G966 N2-methylase RsmD (RsmD) (PDB:2IFT)	1	1	1	386	6128	386	2571		566	566	566				female_bins_95_identity___6424
group_11049	COG0188	DNA gyrase/topoisomerase IV	1	1	1	386	6129	386	2572		2240	2240	2240				female_bins_95_identity___6425
group_1105	COG0438	Glycosyltransferase involved in cell wall bisynthesis (RfaB) (PDB:2IV7)	1	1	1	14	85	14	27		1316	1316	1316	female_bins_95_identity___14496
group_11050	COG0187	DNA gyrase/topoisomerase IV	1	1	1	386	6130	386	2573		1922	1922	1922				female_bins_95_identity___6426
group_11051			1	1	1	386	6131	386	2574		737	737	737				female_bins_95_identity___6427
group_11052	COG2199	GGDEF domain	1	1	1	386	6132	386	2575		1106	1106	1106				female_bins_95_identity___6428
group_11053			1	1	1	386	6133	386	2576		740	740	740				female_bins_95_identity___6429
group_11054			1	1	1	386	6134	386	2577		464	464	464				female_bins_95_identity___6430
group_11055	COG1476	DNA-binding transcriptional regulator	1	1	1	386	6135	386	2578		206	206	206				female_bins_95_identity___6431
COG3434		c-di-GMP phosphodiesterase YuxH/PdeH	1	1	1	386	6136	386	2579		1226	1226	1226				female_bins_95_identity___6432
group_11057			1	1	1	386	6137	386	2580		776	776	776				female_bins_95_identity___6433
group_11058	COG0642	Signal transduction histidine kinase (BaeS) (PDB:1JOY)	1	1	1	386	6138	386	2581		3059	3059	3059				female_bins_95_identity___6434
group_11059	COG0066	3-isopropylmalate dehydratase small subunit (LeuD) (PDB:3Q3W)	1	1	1	386	6139	386	2582		488	488	488				female_bins_95_identity___6435
group_1106	COG1449	Alpha-amylase/alpha-mannosidase	1	1	1	14	84	14	26		1358	1358	1358	female_bins_95_identity___14497
group_11060	COG0065	Homoaconitase/3-isopropylmalate dehydratase large subunit (LeuC) (PDB:4KP1)	1	1	1	386	6140	386	2583		1265	1265	1265				female_bins_95_identity___6436
group_11061	COG0583	DNA-binding transcriptional regulator	1	1	1	386	6141	386	2584		923	923	923				female_bins_95_identity___6437
group_11062	COG1309	DNA-binding protein	1	1	1	386	6142	386	2585		563	563	563				female_bins_95_identity___6438
group_11063	COG0059	Ketol-acid reductoisomerase (IlvC) (PDB:1NP3)	1	1	1	386	6143	386	2586		1016	1016	1016				female_bins_95_identity___6439
group_11064	COG0440	Acetolactate synthase	1	1	1	386	6144	386	2587		497	497	497				female_bins_95_identity___6440
group_11065	COG2227	2-polyprenyl-3-methyl-5-hydroxy-6-metoxy-1	1	1	1	386	6145	386	2588		716	716	716				female_bins_95_identity___6441
group_11066			1	1	1	386	6146	386	2589		1100	1100	1100				female_bins_95_identity___6442
group_11067	COG0440	Acetolactate synthase	1	1	1	386	6147	386	2590		485	485	485				female_bins_95_identity___6443
group_11068	COG0028	Acetolactate synthase large subunit or other thiamine pyrophosphate-requiring enzyme (IlvB) (PDB:1BFD)	1	1	1	386	6148	386	2591		1613	1613	1613				female_bins_95_identity___6444
group_11069	COG0646	Methionine synthase I (cobalamin-dependent)	1	1	1	386	6149	386	2592		2501	2501	2501				female_bins_95_identity___6445
group_1107			1	1	1	14	83	14	25		695	695	695	female_bins_95_identity___14498
group_11070			1	1	1	386	6150	386	2593		662	662	662				female_bins_95_identity___6446
group_11071	COG2217	Cation-transporting P-type ATPase (ZntA) (PDB:4BBJ)	1	1	1	386	6151	386	2594		1913	1913	1913				female_bins_95_identity___6447
group_11072	COG2608	Copper chaperone CopZ (CopZ) (PDB:1AFI)	1	1	1	386	6152	386	2595		218	218	218				female_bins_95_identity___6448
group_11073	COG0640	DNA-binding transcriptional regulator	1	1	1	386	6153	386	2596		401	401	401				female_bins_95_identity___6449
group_11074			1	1	1	386	6154	386	2597		260	260	260				female_bins_95_identity___6450
group_11075	COG0840	Methyl-accepting chemotaxis protein (MCP) (Tar) (PDB:1QU7)	1	1	1	386	6155	386	2598		1742	1742	1742				female_bins_95_identity___6451
group_11076	COG0014	Gamma-glutamyl phosphate reductase (ProA) (PDB:4GHK)	1	1	1	386	6156	386	2599		1256	1256	1256				female_bins_95_identity___6452
group_11077	COG0212	5-formyltetrahydrofolate cyclo-ligase (FAU1) (PDB:1SBQ)	1	1	1	386	6157	386	2600		662	662	662				female_bins_95_identity___6453
COG4224		Uncharacterized conserved protein YnzC	1	1	1	386	6158	386	2601		257	257	257				female_bins_95_identity___6454
COG0263		Glutamate 5-kinase (ProB) (PDB:2W21)	1	1	1	386	6159	386	2602		860	860	860				female_bins_95_identity___6455
group_1108			1	1	1	14	82	14	24		1361	1361	1361	female_bins_95_identity___14499
group_11080	COG2509	FAD-dependent dehydrogenase (PDB:3NLC)	1	1	1	386	6160	386	2603		1655	1655	1655				female_bins_95_identity___6456
group_11081	COG2081	Predicted flavoprotein YhiN (YhiN) (PDB:3V76)	1	1	1	386	6161	386	2604		1355	1355	1355				female_bins_95_identity___6457
group_11082			1	1	1	386	6162	386	2605		608	608	608				female_bins_95_identity___6458
COG5841		Stage V sporulation protein SpoVB/SpoIIIF	1	1	1	386	6163	386	2606		1664	1664	1664				female_bins_95_identity___6459
group_11084	COG0319	ssRNA-specific RNase YbeY	1	1	1	386	6164	386	2607		500	500	500				female_bins_95_identity___6460
group_11085	COG1480	Cyclic di-AMP-specific phosphodiesterase PgpH	1	1	1	386	6165	386	2608		1214	1214	1214				female_bins_95_identity___6461
group_11086	COG1702	Phosphate starvation-inducible protein PhoH	1	1	1	386	6166	386	2609		1010	1010	1010				female_bins_95_identity___6462
group_11087	COG5872	Stage IV sporulation protein YqfD (YqfD)	1	1	1	386	6167	386	2610		1337	1337	1337				female_bins_95_identity___6463
group_11088	COG5868	Sporulation protein YabP (YabP) (PUBMED:11283287	1	1	1	386	6168	386	2611		245	245	245				female_bins_95_identity___6464
COG0213		Thymidine phosphorylase (DeoA) (PDB:1AZY)	1	1	1	386	6169	386	2612		1301	1301	1301				female_bins_95_identity___6465
group_1109	COG0809	S-adenosylmethionine:tRNA-ribosyltransferase-isomerase (queuine synthetase) (QueA) (PDB:1VKY)	1	1	1	14	81	14	23		1208	1208	1208	female_bins_95_identity___14500
COG1576		23S rRNA pseudoU1915 N3-methylase RlmH (RlmH) (PDB:1NS5)	1	1	1	386	6170	386	2613		479	479	479				female_bins_95_identity___6466
group_11091			1	1	1	386	6171	386	2614		722	722	722				female_bins_95_identity___6467
group_11092			1	1	1	386	6172	386	2615		1130	1130	1130				female_bins_95_identity___6468
group_11093			1	1	1	386	6173	386	2616		299	299	299				female_bins_95_identity___6469
group_11094	COG0493	NADPH-dependent glutamate synthase beta chain or related oxidoreductase (GltD) (PDB:1H7X)	1	1	1	386	6174	386	2617		1382	1382	1382				female_bins_95_identity___6470
COG0543		NAD(P)H-flavin reductase (Mcr1) (PDB:3A1F)	1	1	1	386	6175	386	2618		881	881	881				female_bins_95_identity___6471
group_11096	COG1645	Uncharacterized Zn-finger containing protein	1	1	1	386	6176	386	2619		1490	1490	1490				female_bins_95_identity___6472
group_11097	COG0190	5	1	1	1	386	6177	386	2620		845	845	845				female_bins_95_identity___6473
COG2759		Formyltetrahydrofolate synthetase (MIS1) (PDB:1EG7)	1	1	1	386	6178	386	2621		1676	1676	1676				female_bins_95_identity___6474
group_11099	COG1674	DNA segregation ATPase FtsK/SpoIIIE or related protein (FtsK) (PDB:2IUT)	1	1	1	386	6179	386	2622		2741	2741	2741				female_bins_95_identity___6475
COG3598		RecA-family ATPase (RepA)	1	1	1	400	53	400	33		620	620	620		female_bins_95_identity___11065
COG0029		Aspartate oxidase (NadB) (PDB:1KNP)	1	1	1	14	80	14	22		1580	1580	1580	female_bins_95_identity___14501
group_11100	COG0740	ATP-dependent protease ClpP	1	1	1	386	6180	386	2623		758	758	758				female_bins_95_identity___6476
group_11101			1	1	1	386	6181	386	2624		1565	1565	1565				female_bins_95_identity___6477
group_11102	COG2873	O-acetylhomoserine/O-acetylserine sulfhydrylase	1	1	1	386	6182	386	2625		1277	1277	1277				female_bins_95_identity___6478
group_11103			1	1	1	386	6183	386	2626		803	803	803				female_bins_95_identity___6479
group_11104	COG0217	Transcriptional and/or translational regulatory protein YebC/TACO1 (TACO1) (PDB:1KON)	1	1	1	386	6184	386	2627		728	728	728				female_bins_95_identity___6480
group_11105	COG1253	Hemolysin-related protein	1	1	1	386	6185	386	2628		1403	1403	1403				female_bins_95_identity___6481
group_11106	COG2337	mRNA-degrading endonuclease MazF	1	1	1	386	6186	386	2629		341	341	341				female_bins_95_identity___6482
group_11107	COG0787	Alanine racemase (Alr) (PDB:1BD0)	1	1	1	386	6187	386	2630		1181	1181	1181				female_bins_95_identity___6483
group_11108	COG0062	NAD(P)H-hydrate repair enzyme Nnr	1	1	1	386	6188	386	2631		1520	1520	1520				female_bins_95_identity___6484
group_11109			1	1	1	386	6189	386	2632		671	671	671				female_bins_95_identity___6485
group_1111	COG4108	Peptide chain release factor RF-3 (PrfC) (PDB:3UOQ)	1	1	1	14	79	14	21		1562	1562	1562	female_bins_95_identity___14502
group_11110			1	1	1	386	6190	386	2633		1550	1550	1550				female_bins_95_identity___6486
group_11111	COG0488	ATPase components of ABC transporters with duplicated ATPase domains (Uup) (PDB:5ZXD)	1	1	1	386	6191	386	2634		1934	1934	1934				female_bins_95_identity___6487
group_11112	COG0538	Isocitrate dehydrogenase (Icd) (PDB:1IDD)	1	1	1	386	6192	386	2635		1205	1205	1205				female_bins_95_identity___6488
group_11113	COG1802	DNA-binding transcriptional regulator	1	1	1	386	6193	386	2636		689	689	689				female_bins_95_identity___6489
group_11114	COG1404	Serine protease	1	1	1	386	6194	386	2637		890	890	890				female_bins_95_identity___6490
group_11115			1	1	1	386	6195	386	2638		2849	2849	2849				female_bins_95_identity___6491
group_11116			1	1	1	386	6196	386	2639		5504	5504	5504				female_bins_95_identity___6492
group_11117	COG4509	Uncharacterized conserved protein	1	1	1	386	6197	386	2640		1184	1184	1184				female_bins_95_identity___6493
COG3359		Uncharacterized conserved protein YprB	1	1	1	386	6198	386	2641		1232	1232	1232				female_bins_95_identity___6494
group_11119	COG1352	Methylase of chemotaxis methyl-accepting proteins (CheR) (PDB:1AF7)	1	1	1	386	6199	386	2642		776	776	776				female_bins_95_identity___6495
COG0148		Enolase (Eno) (PDB:1E9I)	1	1	1	14	78	14	20		1301	1301	1301	female_bins_95_identity___14503
group_11120	COG0539	Ribosomal protein S1 (RpsA) (PDB:4NNH)	1	1	1	386	6200	386	2643		1142	1142	1142				female_bins_95_identity___6496
group_11121	COG0761	4-Hydroxy-3-methylbut-2-enyl diphosphate reductase IspH (IspH) (PDB:3DNF)	1	1	1	386	6201	386	2644		848	848	848				female_bins_95_identity___6497
group_11122	COG0283	Cytidylate kinase (Cmk) (PDB:3R20) (PUBMED:19111750	1	1	1	386	6202	386	2645		671	671	671				female_bins_95_identity___6498
group_11123	COG2081	Predicted flavoprotein YhiN (YhiN) (PDB:3V76)	1	1	1	386	6203	386	2646		1316	1316	1316				female_bins_95_identity___6499
group_11124	COG1737	DNA-binding transcriptional regulator	1	1	1	386	6204	386	2647		923	923	923				female_bins_95_identity___6500
group_11125	COG1309	DNA-binding protein	1	1	1	386	6205	386	2648		554	554	554				female_bins_95_identity___6501
group_11126	COG5016	Pyruvate/oxaloacetate carboxyltransferase (OadA1) (PDB:2NX9) (PUBMED:18681940)	1	1	1	386	6206	386	2649		1427	1427	1427				female_bins_95_identity___6502
group_11127	COG1883	Na+-transporting oxaloacetate/methylmalonyl-CoA decarboxylase	1	1	1	386	6207	386	2650		1148	1148	1148				female_bins_95_identity___6503
group_11128	COG4770	Acetyl/propionyl-CoA carboxylase	1	1	1	386	6208	386	2651		374	374	374				female_bins_95_identity___6504
group_11129	COG3630	Na+-transporting oxaloacetate/methylmalonyl-CoA decarboxylase	1	1	1	386	6209	386	2652		713	713	713				female_bins_95_identity___6505
group_1113			1	1	1	14	77	14	19		554	554	554	female_bins_95_identity___14504
group_11130	COG4799	Acetyl-CoA carboxylase	1	1	1	386	6210	386	2653		1427	1427	1427				female_bins_95_identity___6506
group_11131	COG1686	D-alanyl-D-alanine carboxypeptidase (DacC) (PDB:1HD8)	1	1	1	386	6211	386	2654		1292	1292	1292				female_bins_95_identity___6507
COG2244		Membrane protein involved in the export of O-antigen and teichoic acid (RfbX)	1	1	1	386	6212	386	2655		1394	1394	1394				female_bins_95_identity___6508
group_11133			1	1	1	386	6213	386	2656		1247	1247	1247				female_bins_95_identity___6509
group_11134	COG1216	Glycosyltransferase	1	1	1	386	6214	386	2657		956	956	956				female_bins_95_identity___6510
group_11135	COG0438	Glycosyltransferase involved in cell wall bisynthesis (RfaB) (PDB:2IV7)	1	1	1	386	6215	386	2658		1040	1040	1040				female_bins_95_identity___6511
group_11136	COG1211	2-C-methyl-D-erythritol 4-phosphate cytidylyltransferase (IspD) (PDB:1H3M)	1	1	1	386	6216	386	2659		728	728	728				female_bins_95_identity___6512
COG3475		Phosphorylcholine metabolism protein LicD (LicD)	1	1	1	386	6217	386	2660		830	830	830				female_bins_95_identity___6513
group_11138	COG2148	Sugar transferase involved in LPS biosynthesis (colanic	1	1	1	386	6218	386	2661		692	692	692				female_bins_95_identity___6514
group_11139			1	1	1	386	6219	386	2662		566	566	566				female_bins_95_identity___6515
group_1114	COG0539	Ribosomal protein S1 (RpsA) (PDB:4NNH)	1	1	1	14	76	14	18		1793	1793	1793	female_bins_95_identity___14505
COG4509		Uncharacterized conserved protein	1	1	1	386	6220	386	2663		878	878	878				female_bins_95_identity___6516
COG1316		Anionic cell wall polymer biosynthesis enzyme TagV/TagU	1	1	1	386	6221	386	2664		1016	1016	1016				female_bins_95_identity___6517
group_11142	COG0489	Fe-S cluster carrier ATPase	1	1	1	386	6222	386	2665		764	764	764				female_bins_95_identity___6518
COG3944		Capsular polysaccharide biosynthesis protein YveK (YveK)	1	1	1	386	6223	386	2666		722	722	722				female_bins_95_identity___6519
COG4464		Tyrosine-protein phosphatase YwqE (YwqE) (PDB:3QY6)	1	1	1	386	6224	386	2667		731	731	731				female_bins_95_identity___6520
group_11145			1	1	1	386	6225	386	2668		128	128	128				female_bins_95_identity___6521
group_11146	COG1386	Chromosome segregation and condensation protein ScpB (ScpB) (PDB:1T6S)	1	1	1	386	6226	386	2669		569	569	569				female_bins_95_identity___6522
group_11147	COG1354	Chromatin segregation and condensation protein Rec8/ScpA/Scc1	1	1	1	386	6227	386	2670		749	749	749				female_bins_95_identity___6523
group_11148	COG1408	Predicted phosphohydrolase	1	1	1	386	6228	386	2671		872	872	872				female_bins_95_identity___6524
group_11149	COG1686	D-alanyl-D-alanine carboxypeptidase (DacC) (PDB:1HD8)	1	1	1	386	6229	386	2672		1196	1196	1196				female_bins_95_identity___6525
group_1115	COG0268	Ribosomal protein S20 (RpsT) (PDB:4V4H)	1	1	1	14	75	14	17		251	251	251	female_bins_95_identity___14506
COG1323		tRNA-Met C34-N4-acetylcytidine synthase TmcAL (TmcAL) (PDB:5Y0T) (PUBMED:30150682)	1	1	1	386	6018	386	2699		1235	1235	1235				female_bins_95_identity___6527
group_11151	COG0204	1-acyl-sn-glycerol-3-phosphate acyltransferase (PlsC) (PDB:1IUQ)	1	1	1	386	6017	386	2698		641	641	641				female_bins_95_identity___6528
group_11152	COG1502	Phosphatidylserine/phosphatidylglycerophosphate/cardiolipin synthase (Cls) (PDB:1BYR)	1	1	1	386	6016	386	2697		1529	1529	1529				female_bins_95_identity___6529
group_11153	COG0053	Divalent metal cation (Fe/Co/Zn/Cd) efflux pump (FieF) (PDB:2QFI)	1	1	1	386	6015	386	2696		872	872	872				female_bins_95_identity___6530
group_11154	COG1925	HPr or related phosphotransfer protein (PtsH) (PDB:1CM2)	1	1	1	386	6014	386	2695		245	245	245				female_bins_95_identity___6531
COG0371		Glycerol dehydrogenase or related enzyme	1	1	1	386	6013	386	2694		1046	1046	1046				female_bins_95_identity___6532
group_11156	COG0428	Zinc transporter ZupT (ZupT) (PDB:5TSA)	1	1	1	386	6012	386	2693		776	776	776				female_bins_95_identity___6533
group_11157	COG0366	Glycosidase/amylase (phosphorylase) (AmyA) (PDB:2P67) (PUBMED:29684280)	1	1	1	386	6011	386	2692		1763	1763	1763				female_bins_95_identity___6534
group_11158			1	1	1	386	6010	386	2691		440	440	440				female_bins_95_identity___6535
COG1321		Mn-dependent transcriptional regulator MntR	1	1	1	386	6009	386	2690		374	374	374				female_bins_95_identity___6536
group_1116	COG0614	ABC-type Fe3+-hydroxamate transport system	1	1	1	14	74	14	16		1169	1169	1169	female_bins_95_identity___14507
group_11160	COG0534	Na+-driven multidrug efflux pump	1	1	1	386	6008	386	2689		1388	1388	1388				female_bins_95_identity___6537
group_11161	COG2848	Uncharacterized conserved protein	1	1	1	386	6007	386	2688		1364	1364	1364				female_bins_95_identity___6538
group_11162	COG3830	ACT domain	1	1	1	386	6006	386	2687		272	272	272				female_bins_95_identity___6539
group_11163	COG1235	Phosphoribosyl 1	1	1	1	386	6005	386	2686		800	800	800				female_bins_95_identity___6540
group_11164	COG0849	Cell division ATPase FtsA (FtsA) (PDB:3WT0)	1	1	1	386	6004	386	2685		2333	2333	2333				female_bins_95_identity___6541
group_11165	COG0237	Dephospho-CoA kinase (CoaE) (PDB:1JJV)	1	1	1	386	6003	386	2684		605	605	605				female_bins_95_identity___6542
group_11166	COG0258	5'-3' exonuclease Xni/ExoIX (flap endonuclease) (ExoIX) (PDB:3ZDA) (PUBMED:19000038	1	1	1	386	6002	386	2683		2711	2711	2711				female_bins_95_identity___6543
group_11167			1	1	1	386	6001	386	2682		323	323	323				female_bins_95_identity___6544
group_11168	COG3757	Lyzozyme M1 (1	1	1	1	386	6000	386	2681		1661	1661	1661				female_bins_95_identity___6545
group_11169			1	1	1	386	5999	386	2680		1130	1130	1130				female_bins_95_identity___6546
COG0571		dsRNA-specific ribonuclease (Rnc) (PDB:1DI2)	1	1	1	14	73	14	15		773	773	773	female_bins_95_identity___14508
group_11170	COG0019	Diaminopimelate decarboxylase (LysA) (PDB:1D7K)	1	1	1	386	5998	386	2679		1262	1262	1262				female_bins_95_identity___6547
group_11171	COG0692	Uracil-DNA glycosylase (Ung) (PDB:1AKZ) (PUBMED:16237021)	1	1	1	386	5997	386	2678		683	683	683				female_bins_95_identity___6548
group_11172	COG0107	Imidazole glycerol phosphate synthase subunit HisF (HisF) (PDB:1OX4)	1	1	1	386	5996	386	2677		761	761	761				female_bins_95_identity___6549
group_11173	COG0118	Imidazoleglycerol phosphate synthase glutamine amidotransferase subunit HisH (HisH) (PDB:1OX4)	1	1	1	386	5995	386	2676		641	641	641				female_bins_95_identity___6550
group_11174			1	1	1	386	5994	386	2675		2573	2573	2573				female_bins_95_identity___6551
group_11175	COG0846	NAD-dependent protein deacetylase	1	1	1	386	5993	386	2674		809	809	809				female_bins_95_identity___6552
group_11176	COG0784	CheY-like REC (receiver) domain	1	1	1	386	5992	386	2673		896	896	896				female_bins_95_identity___6553
COG0606		Predicted Mg-chelatase	1	1	1	1	38	1	98		1211	1211	1211				female_bins_95_identity___7054
COG2805		Type IV pilus assembly protein PilT	1	1	1	1	39	1	99		908	908	908				female_bins_95_identity___7055
group_11179	COG2206	HD-GYP domain	1	1	1	1	40	1	100		1175	1175	1175				female_bins_95_identity___7056
group_1118	COG0304	3-oxoacyl-(acyl-carrier-protein) synthase (FabB) (PDB:2UV8) (PUBMED:21652641)	1	1	1	14	72	14	14		1247	1247	1247	female_bins_95_identity___14509
group_11180	COG5814	Sporulation sigma factor SigK (mother cell-specific	1	1	1	1	41	1	101		629	629	629				female_bins_95_identity___7057
group_11181	COG0635	Coproporphyrinogen-III oxidase HemN (oxygen-independent) or related Fe-S oxidoreductase (HemN) (PDB:1OLT)	1	1	1	1	42	1	102		1178	1178	1178				female_bins_95_identity___7058
group_11182	COG0481	Translation elongation factor EF-4	1	1	1	1	43	1	103		1928	1928	1928				female_bins_95_identity___7059
group_11183	COG5819	Stage II sporulation protein SpoIIP	1	1	1	1	44	1	104		1364	1364	1364				female_bins_95_identity___7060
COG5911		Spore germination protease Gpr (Gpr) (PUBMED:1840582	1	1	1	1	45	1	105		875	875	875				female_bins_95_identity___7061
group_11185	COG0268	Ribosomal protein S20 (RpsT) (PDB:4V4H)	1	1	1	1	46	1	106		263	263	263				female_bins_95_identity___7062
group_11186			1	1	1	1	47	1	107		884	884	884				female_bins_95_identity___7063
group_11187	COG1996	DNA-directed RNA polymerase	1	1	1	1	48	1	108		983	983	983				female_bins_95_identity___7064
COG2119		Putative Ca2+/H+ antiporter	1	1	1	1	49	1	109		728	728	728				female_bins_95_identity___7065
group_11189	COG0034	Glutamine phosphoribosylpyrophosphate amidotransferase (PurF) (PDB:1ECB)	1	1	1	1	50	1	110		1406	1406	1406				female_bins_95_identity___7066
group_1119	COG0236	Acyl carrier protein (AcpP) (PDB:1ACP)	1	1	1	14	71	14	13		236	236	236	female_bins_95_identity___14510
group_11190	COG0719	Fe-S cluster assembly scaffold protein SufB (SufB) (PDB:1VH4)	1	1	1	1	51	1	111		920	920	920				female_bins_95_identity___7067
group_11191	COG0396	Fe-S cluster assembly ATPase SufC (SufC) (PDB:2D3W)	1	1	1	1	52	1	112		752	752	752				female_bins_95_identity___7068
group_11192	COG1670	Protein N-acetyltransferase	1	1	1	1	53	1	113		527	527	527				female_bins_95_identity___7069
group_11193	COG0104	Adenylosuccinate synthase (PurA) (PDB:1ADE)	1	1	1	1	54	1	114		1286	1286	1286				female_bins_95_identity___7070
group_11194	COG0015	Adenylosuccinate lyase (PurB) (PDB:2HVG)	1	1	1	1	55	1	115		1451	1451	1451				female_bins_95_identity___7071
group_11195	COG0034	Glutamine phosphoribosylpyrophosphate amidotransferase (PurF) (PDB:1ECB)	1	1	1	1	56	1	116		1436	1436	1436				female_bins_95_identity___7072
group_11196	COG0152	Phosphoribosylaminoimidazole-succinocarboxamide synthase (PurC) (PDB:1A48)	1	1	1	1	57	1	117		704	704	704				female_bins_95_identity___7073
group_11197			1	1	1	1	58	1	118		1199	1199	1199				female_bins_95_identity___7074
group_11198			1	1	1	1	59	1	119		848	848	848				female_bins_95_identity___7075
group_11199			1	1	1	1	60	1	120		1316	1316	1316				female_bins_95_identity___7076
COG3340		Peptidase E (PepE) (PDB:1FY2)	1	1	1	14	70	14	12		701	701	701	female_bins_95_identity___14511
group_11200			1	1	1	1	61	1	121		3605	3605	3605				female_bins_95_identity___7077
group_11201	COG3409	Peptidoglycan-binding (PGRP) domain of peptidoglycan hydrolases (PGRP) (PDB:4FET)	1	1	1	1	62	1	122		593	593	593				female_bins_95_identity___7078
group_11202	COG0534	Na+-driven multidrug efflux pump	1	1	1	1	63	1	123		1349	1349	1349				female_bins_95_identity___7079
group_11203	COG0583	DNA-binding transcriptional regulator	1	1	1	1	64	1	124		905	905	905				female_bins_95_identity___7080
group_11204			1	1	1	1	65	1	125		1061	1061	1061				female_bins_95_identity___7081
group_11205			1	1	1	1	66	1	126		1649	1649	1649				female_bins_95_identity___7082
group_11206	COG3409	Peptidoglycan-binding (PGRP) domain of peptidoglycan hydrolases (PGRP) (PDB:4FET)	1	1	1	1	67	1	127		686	686	686				female_bins_95_identity___7083
COG5010		Flp pilus assembly protein TadD	1	1	1	1	68	1	128		2210	2210	2210				female_bins_95_identity___7084
group_11208	COG0110	Acetyltransferase	1	1	1	1	69	1	129		596	596	596				female_bins_95_identity___7085
group_11209	COG0326	Molecular chaperone	1	1	1	1	70	1	130		2138	2138	2138				female_bins_95_identity___7086
group_1121	COG0792	Predicted endonuclease distantly related to archaeal Holliday junction resolvase	1	1	1	14	69	14	11		587	587	587	female_bins_95_identity___14512
group_11210	COG0760	Peptidyl-prolyl isomerase	1	1	1	1	71	1	131		1061	1061	1061				female_bins_95_identity___7087
group_11211	COG0613	5'-3' exoribonuclease TrpH/YciV (RNase AM)	1	1	1	1	72	1	132		758	758	758				female_bins_95_identity___7088
group_11212	COG0115	Branched-chain amino acid aminotransferase/4-amino-4-deoxychorismate lyase (IlvE) (PDB:1A3G)	1	1	1	1	73	1	133		1025	1025	1025				female_bins_95_identity___7089
group_11213	COG0642	Signal transduction histidine kinase (BaeS) (PDB:1JOY)	1	1	1	1	74	1	134		1997	1997	1997				female_bins_95_identity___7090
group_11214	COG0262	Dihydrofolate reductase (FolA) (PDB:1DDR)	1	1	1	1	75	1	135		602	602	602				female_bins_95_identity___7091
group_11215	COG0207	Thymidylate synthase (ThyA) (PDB:1AN5)	1	1	1	1	76	1	136		848	848	848				female_bins_95_identity___7092
group_11216	COG1236	RNA processing exonuclease	1	1	1	1	77	1	137		1706	1706	1706				female_bins_95_identity___7093
group_11217	COG1971	Putative Mn2+ efflux pump MntP (MntP)	1	1	1	1	78	1	138		635	635	635				female_bins_95_identity___7094
group_11218	COG0474	Magnesium-transporting ATPase (P-type) (MgtA) (PDB:1IWO)	1	1	1	1	79	1	139		2765	2765	2765				female_bins_95_identity___7095
group_11219	COG0782	Transcription elongation factor	1	1	1	1	80	1	140		503	503	503				female_bins_95_identity___7096
COG1519		3-deoxy-D-manno-octulosonic-acid transferase (KdtA) (PDB:2XCI)	1	1	1	14	68	14	10		1232	1232	1232	female_bins_95_identity___14513
group_11220	COG5464	Recombination-promoting DNA endonuclease RpnC/YadD (RpnC) (PUBMED:28096446)	1	1	1	1	81	1	141		1241	1241	1241				female_bins_95_identity___7097
group_11221	COG1132	ABC-type multidrug transport system	1	1	1	1	82	1	142		1904	1904	1904				female_bins_95_identity___7098
group_11222	COG1132	ABC-type multidrug transport system	1	1	1	1	83	1	143		1868	1868	1868				female_bins_95_identity___7099
group_11223	COG3290	Sensor histidine kinase DipB regulating citrate/malate metabolism (CitA)	1	1	1	1	84	1	144		698	698	698				female_bins_95_identity___7100
group_11224	COG3279	DNA-binding response regulator	1	1	1	1	85	1	145		707	707	707				female_bins_95_identity___7101
group_11225			1	1	1	1	86	1	146		701	701	701				female_bins_95_identity___7102
COG2364		Uncharacterized membrane protein YczE (YczE)	1	1	1	1	87	1	147		842	842	842				female_bins_95_identity___7103
group_11227			1	1	1	1	88	1	148		854	854	854				female_bins_95_identity___7104
group_11228	COG5002	Sensor histidine kinase WalK (WalK) (PDB:4I5S)	1	1	1	1	89	1	149		1403	1403	1403				female_bins_95_identity___7105
group_11229	COG0745	DNA-binding response regulator	1	1	1	1	90	1	150		653	653	653				female_bins_95_identity___7106
group_1123	COG3681	L-cysteine desulfidase YhaM (CdsB) (PUBMED:21169490)	1	1	1	14	67	14	9		1307	1307	1307	female_bins_95_identity___14514
group_11230			1	1	1	1	91	1	151		1181	1181	1181				female_bins_95_identity___7107
group_11231	COG1595	DNA-directed RNA polymerase specialized sigma subunit	1	1	1	1	92	1	152		539	539	539				female_bins_95_identity___7108
group_11232			1	1	1	1	93	1	153		614	614	614				female_bins_95_identity___7109
group_11233	COG1595	DNA-directed RNA polymerase specialized sigma subunit	1	1	1	1	94	1	154		629	629	629				female_bins_95_identity___7110
group_11234	COG2755	Lysophospholipase L1 or related esterase. Includes spore coat protein LipC/YcsK (TesA) (PDB:1BWP)	1	1	1	1	95	1	155		1496	1496	1496				female_bins_95_identity___7111
group_11235	COG0566	tRNA G18 (ribose-2'-O)-methylase SpoU (SpoU) (PDB:1GZ0)	1	1	1	1	96	1	156		764	764	764				female_bins_95_identity___7112
COG1939		23S rRNA maturation mini-RNase III (MrnC) (PDB:1U61)	1	1	1	1	97	1	157		440	440	440				female_bins_95_identity___7113
group_11237	COG0215	Cysteinyl-tRNA synthetase (CysS) (PDB:1LI5)	1	1	1	1	98	1	158		1430	1430	1430				female_bins_95_identity___7114
group_11238	COG1045	Serine acetyltransferase (CysE) (PDB:1T3D)	1	1	1	1	99	1	159		680	680	680				female_bins_95_identity___7115
group_11239	COG0642	Signal transduction histidine kinase (BaeS) (PDB:1JOY)	1	1	1	1	100	1	160		2690	2690	2690				female_bins_95_identity___7116
group_1124	COG2003	DNA repair protein RadC	1	1	1	14	66	14	8		638	638	638	female_bins_95_identity___14515
group_11240	COG2197	DNA-binding response regulator	1	1	1	1	101	1	161		959	959	959				female_bins_95_identity___7117
group_11241	COG0245	2C-methyl-D-erythritol 2	1	1	1	1	102	1	162		566	566	566				female_bins_95_identity___7118
group_11242	COG0452	Phosphopantothenoylcysteine synthetase/decarboxylase CoaBC (CoaBC) (PDB:3QJG)	1	1	1	1	103	1	163		1190	1190	1190				female_bins_95_identity___7119
COG1521		Pantothenate kinase type III (CoaX) (PDB:2F9T)	1	1	1	1	104	1	164		773	773	773				female_bins_95_identity___7120
group_11244	COG4684	Uncharacterized membrane protein	1	1	1	1	105	1	165		824	824	824				female_bins_95_identity___7121
group_11245	COG4586	ABC-type uncharacterized transport system	1	1	1	1	106	1	166		995	995	995				female_bins_95_identity___7122
group_11246	COG4587	ABC-type uncharacterized transport system	1	1	1	1	107	1	167		794	794	794				female_bins_95_identity___7123
group_11247	COG3694	ABC-type uncharacterized transport system	1	1	1	1	108	1	168		803	803	803				female_bins_95_identity___7124
group_11248			1	1	1	1	109	1	169		638	638	638				female_bins_95_identity___7125
group_11249	COG0451	Nucleoside-diphosphate-sugar epimerase (WcaG) (PDB:2X4G)	1	1	1	1	110	1	170		626	626	626				female_bins_95_identity___7126
group_1125	COG0423	Glycyl-tRNA synthetase	1	1	1	14	65	14	7		1544	1544	1544	female_bins_95_identity___14516
group_11250			1	1	1	1	111	1	171		1259	1259	1259				female_bins_95_identity___7127
group_11251			1	1	1	1	112	1	172		800	800	800				female_bins_95_identity___7128
group_11252			1	1	1	1	113	1	173		632	632	632				female_bins_95_identity___7129
group_11253			1	1	1	1	114	1	174		1607	1607	1607				female_bins_95_identity___7130
group_11254			1	1	1	1	115	1	175		626	626	626				female_bins_95_identity___7131
group_11255	COG5280	Phage-related minor tail protein (YqbO)	1	1	1	1	116	1	176		2798	2798	2798				female_bins_95_identity___7132
group_11256			1	1	1	1	117	1	177		317	317	317				female_bins_95_identity___7133
group_11257			1	1	1	1	118	1	178		515	515	515				female_bins_95_identity___7134
group_11258			1	1	1	1	119	1	179		749	749	749				female_bins_95_identity___7135
group_11259			1	1	1	1	120	1	180		380	380	380				female_bins_95_identity___7136
group_1126	COG0816	YqgF/RuvX protein	1	1	1	14	64	14	6		413	413	413	female_bins_95_identity___14517
group_11260			1	1	1	1	121	1	181		410	410	410				female_bins_95_identity___7137
group_11261			1	1	1	1	122	1	182		350	350	350				female_bins_95_identity___7138
group_11262			1	1	1	1	123	1	183		521	521	521				female_bins_95_identity___7139
group_11263			1	1	1	1	124	1	184		383	383	383				female_bins_95_identity___7140
group_11264			1	1	1	1	125	1	185		995	995	995				female_bins_95_identity___7141
group_11265			1	1	1	1	126	1	186		560	560	560				female_bins_95_identity___7142
group_11266			1	1	1	1	127	1	187		209	209	209				female_bins_95_identity___7143
COG2369		Uncharacterized protein	1	1	1	1	128	1	188		1478	1478	1478				female_bins_95_identity___7144
group_11268			1	1	1	1	129	1	189		1412	1412	1412				female_bins_95_identity___7145
group_11269	COG5410	Uncharacterized conserved protein (PUBMED:23071111)	1	1	1	1	130	1	190		1517	1517	1517				female_bins_95_identity___7146
group_1127	COG0242	Peptide deformylase (Def) (PDB:1BS4)	1	1	1	14	63	14	5		545	545	545	female_bins_95_identity___14518
group_11270			1	1	1	1	131	1	191		284	284	284				female_bins_95_identity___7147
group_11271			1	1	1	1	132	1	192		560	560	560				female_bins_95_identity___7148
group_11272			1	1	1	1	133	1	193		302	302	302				female_bins_95_identity___7149
group_11273			1	1	1	1	134	1	194		302	302	302				female_bins_95_identity___7150
group_11274			1	1	1	1	135	1	195		563	563	563				female_bins_95_identity___7151
group_11275	COG3757	Lyzozyme M1 (1	1	1	1	1	136	1	196		1325	1325	1325				female_bins_95_identity___7152
group_11276			1	1	1	1	137	1	197		314	314	314				female_bins_95_identity___7153
COG5566		Transcriptional regulator	1	1	1	1	138	1	198		377	377	377				female_bins_95_identity___7154
group_11278			1	1	1	1	139	1	199		437	437	437				female_bins_95_identity___7155
COG4396		Mu-like prophage host-nuclease inhibitor protein Gam (Gam)	1	1	1	1	140	1	200		494	494	494				female_bins_95_identity___7156
group_1128			1	1	1	14	62	14	4		482	482	482	female_bins_95_identity___14519
group_11280			1	1	1	1	141	1	201		188	188	188				female_bins_95_identity___7157
group_11281			1	1	1	1	142	1	202		326	326	326				female_bins_95_identity___7158
COG2842		Bacteriophage DNA transposition protein	1	1	1	1	143	1	203		926	926	926				female_bins_95_identity___7159
group_11283	COG2801	Transposase InsO and inactivated derivatives (Tra5)	1	1	1	1	144	1	204		1949	1949	1949				female_bins_95_identity___7160
group_11284			1	1	1	1	145	1	205		209	209	209				female_bins_95_identity___7161
group_11285			1	1	1	1	146	1	206		200	200	200				female_bins_95_identity___7162
group_11286			1	1	1	1	147	1	207		200	200	200				female_bins_95_identity___7163
group_11287			1	1	1	1	148	1	208		260	260	260				female_bins_95_identity___7164
group_11288			1	1	1	1	149	1	209		272	272	272				female_bins_95_identity___7165
group_11289	COG1396	Transcriptional regulator	1	1	1	1	150	1	210		329	329	329				female_bins_95_identity___7166
group_1129			1	1	1	14	61	14	3		467	467	467	female_bins_95_identity___14520
group_11290	COG0451	Nucleoside-diphosphate-sugar epimerase (WcaG) (PDB:2X4G)	1	1	1	1	151	1	211		245	245	245				female_bins_95_identity___7167
group_11291	COG0561	Hydroxymethylpyrimidine pyrophosphatase and other HAD family phosphatases (Cof) (PDB:1YMQ)	1	1	1	1	152	1	212		770	770	770				female_bins_95_identity___7168
group_11292	COG0456	Ribosomal protein S18 acetylase RimI and related acetyltransferases (RimI) (PDB:1GHE)	1	1	1	1	153	1	213		461	461	461				female_bins_95_identity___7169
group_11293			1	1	1	1	154	1	214		536	536	536				female_bins_95_identity___7170
group_11294	COG3041	mRNA-degrading endonuclease YafQ (mRNA interferase)	1	1	1	1	155	1	215		272	272	272				female_bins_95_identity___7171
group_11295	COG3077	Antitoxin component of the RelBE or YafQ-DinJ toxin-antitoxin module (RelB) (PDB:4ML0)	1	1	1	1	156	1	216		272	272	272				female_bins_95_identity___7172
group_11296	COG0018	Arginyl-tRNA synthetase (ArgS) (PDB:1BS2)	1	1	1	1	157	1	217		1820	1820	1820				female_bins_95_identity___7173
COG1636		Epoxyqueuosine reductase QueH (tRNA modification) (QueH) (PUBMED:28128549)	1	1	1	1	158	1	218		686	686	686				female_bins_95_identity___7174
group_11298			1	1	1	1	159	1	219		110	110	110				female_bins_95_identity___7175
group_11299	COG0458	Carbamoylphosphate synthase large subunit (CarB) (PDB:1C30)	1	1	1	1	160	1	220		3221	3221	3221				female_bins_95_identity___7176
group_1130	COG0574	Phosphoenolpyruvate synthase/pyruvate phosphate dikinase (PpsA) (PDB:5HV6)	1	1	1	14	60	14	2		2729	2729	2729	female_bins_95_identity___14521
group_11300	COG0505	Carbamoylphosphate synthase small subunit (CarA) (PDB:1C30)	1	1	1	1	161	1	221		1205	1205	1205				female_bins_95_identity___7177
COG3581		Predicted nucleotide-binding protein	1	1	1	1	162	1	222		1241	1241	1241				female_bins_95_identity___7178
group_11302	COG0046	Phosphoribosylformylglycinamidine (FGAM) synthase	1	1	1	1	163	1	223		3893	3893	3893				female_bins_95_identity___7179
group_11303	COG1309	DNA-binding protein	1	1	1	1	164	1	224		584	584	584				female_bins_95_identity___7180
group_11304			1	1	1	1	165	1	225		503	503	503				female_bins_95_identity___7181
group_11305	COG2755	Lysophospholipase L1 or related esterase. Includes spore coat protein LipC/YcsK (TesA) (PDB:1BWP)	1	1	1	1	166	1	226		1220	1220	1220				female_bins_95_identity___7182
COG0664		cAMP-binding domain of CRP or a regulatory subunit of cAMP-dependent protein kinases (Crp) (PDB:1FT9)	1	1	1	1	167	1	227		2261	2261	2261				female_bins_95_identity___7183
COG2223		Nitrate/nitrite transporter NarK (NarK) (PDB:4JR9)	1	1	1	1	168	1	228		1349	1349	1349				female_bins_95_identity___7184
group_11308	COG0366	Glycosidase/amylase (phosphorylase) (AmyA) (PDB:2P67) (PUBMED:29684280)	1	1	1	1	169	1	229		1784	1784	1784				female_bins_95_identity___7185
group_11309	COG3833	ABC-type maltose transport system	1	1	1	1	170	1	230		863	863	863				female_bins_95_identity___7186
group_1131			1	1	1	14	59	14	1		752	752	752	female_bins_95_identity___14522
group_11310	COG1175	ABC-type sugar transport system	1	1	1	1	171	1	231		1418	1418	1418				female_bins_95_identity___7187
group_11311	COG2182	Maltose-binding periplasmic protein MalE (MalE) (PDB:1T0K)	1	1	1	1	172	1	232		1211	1211	1211				female_bins_95_identity___7188
group_11312	COG1609	DNA-binding transcriptional regulator	1	1	1	1	173	1	233		1028	1028	1028				female_bins_95_identity___7189
group_11313	COG3867	Arabinogalactan endo-1	1	1	1	1	174	1	234		1106	1106	1106				female_bins_95_identity___7190
group_11314			1	1	1	1	175	1	235		218	218	218				female_bins_95_identity___7191
group_11315			1	1	1	1	176	1	236		1859	1859	1859				female_bins_95_identity___7192
group_11316	COG1609	DNA-binding transcriptional regulator	1	1	1	1	177	1	237		1001	1001	1001				female_bins_95_identity___7193
group_11317			1	1	1	1	178	1	238		383	383	383				female_bins_95_identity___7194
COG3544		Uncharacterized conserved protein	1	1	1	1	179	1	239		590	590	590				female_bins_95_identity___7195
group_11319	COG1695	DNA-binding transcriptional regulator	1	1	1	1	180	1	240		554	554	554				female_bins_95_identity___7196
group_1132			1	1	1	236	9	242	1		404	404	404	female_bins_95_identity___14523
group_11320			1	1	1	1	181	1	241		758	758	758				female_bins_95_identity___7197
group_11321	COG0745	DNA-binding response regulator	1	1	1	1	182	1	242		686	686	686				female_bins_95_identity___7198
COG2205		K+-sensing histidine kinase KdpD (KdpD) (PDB:2KSF)	1	1	1	1	183	1	243		851	851	851				female_bins_95_identity___7199
group_11323	COG1136	ABC-type lipoprotein export system	1	1	1	1	184	1	244		674	674	674				female_bins_95_identity___7200
group_11324	COG0577	ABC-type antimicrobial peptide transport system	1	1	1	1	185	1	245		2591	2591	2591				female_bins_95_identity___7201
group_11325	COG1136	ABC-type lipoprotein export system	1	1	1	1	186	1	246		668	668	668				female_bins_95_identity___7202
group_11326	COG1874	Beta-galactosidase GanA (GanA) (PDB:1KWG)	1	1	1	1	187	1	247		2009	2009	2009				female_bins_95_identity___7203
group_11327	COG3867	Arabinogalactan endo-1	1	1	1	1	188	1	248		2192	2192	2192				female_bins_95_identity___7204
group_11328			1	1	1	1	189	1	249		188	188	188				female_bins_95_identity___7205
group_11329			1	1	1	1	190	1	250		545	545	545				female_bins_95_identity___7206
COG0272		NAD-dependent DNA ligase (Lig) (PDB:5TT5)	1	1	1	236	8	242	9		2072	2072	2072	female_bins_95_identity___14524
group_11330	COG1132	ABC-type multidrug transport system	1	1	1	1	191	1	251		1754	1754	1754				female_bins_95_identity___7207
group_11331	COG1132	ABC-type multidrug transport system	1	1	1	1	192	1	252		1730	1730	1730				female_bins_95_identity___7208
group_11332	COG1316	Anionic cell wall polymer biosynthesis enzyme TagV/TagU	1	1	1	1	193	1	253		1130	1130	1130				female_bins_95_identity___7209
group_11333	COG1066	DNA repair protein RadA/Sms	1	1	1	1	194	1	254		1370	1370	1370				female_bins_95_identity___7210
group_11334			1	1	1	1	195	1	255		410	410	410				female_bins_95_identity___7211
group_11335	COG0542	ATP-dependent Clp protease	1	1	1	1	196	1	256		2453	2453	2453				female_bins_95_identity___7212
group_11336	COG1725	DNA-binding transcriptional regulator YhcF	1	1	1	1	197	1	257		374	374	374				female_bins_95_identity___7213
group_11337	COG3103	Uncharacterized conserved protein YgiM	1	1	1	1	198	1	258		1409	1409	1409				female_bins_95_identity___7214
group_11338			1	1	1	1	199	1	259		467	467	467				female_bins_95_identity___7215
group_11339	COG0151	Phosphoribosylamine-glycine ligase (PurD) (PDB:1GSO)	1	1	1	1	200	1	260		1271	1271	1271				female_bins_95_identity___7216
group_1134	COG0329	4-hydroxy-tetrahydrodipicolinate synthase/N-acetylneuraminate lyase (DapA) (PDB:2R91) (PUBMED:27574185)	1	1	1	236	7	242	8		890	890	890	female_bins_95_identity___14525
group_11340	COG0299	Folate-dependent phosphoribosylglycinamide formyltransferase PurN (PurN) (PDB:1C2T) (PUBMED:25013077)	1	1	1	1	201	1	261		623	623	623				female_bins_95_identity___7217
group_11341	COG0150	Phosphoribosylaminoimidazole (AIR) synthetase (PurM) (PDB:1CLI)	1	1	1	1	202	1	262		1049	1049	1049				female_bins_95_identity___7218
group_11342	COG0041	Phosphoribosylcarboxyaminoimidazole (NCAIR) mutase (PurE) (PDB:1D7A)	1	1	1	1	203	1	263		506	506	506				female_bins_95_identity___7219
COG2309		Leucyl aminopeptidase (aminopeptidase T) (AmpS) (PDB:1ZJC)	1	1	1	1	204	1	264		2153	2153	2153				female_bins_95_identity___7220
group_11344			1	1	1	1	205	1	265		329	329	329				female_bins_95_identity___7221
group_11345			1	1	1	1	206	1	266		152	152	152				female_bins_95_identity___7222
group_11346	COG0461	Orotate phosphoribosyltransferase (PyrE) (PDB:4WML)	1	1	1	1	207	1	267		677	677	677				female_bins_95_identity___7223
group_11347	COG0284	Orotidine-5'-phosphate decarboxylase (PyrF) (PDB:1DBT)	1	1	1	1	208	1	268		977	977	977				female_bins_95_identity___7224
group_11348			1	1	1	1	209	1	269		404	404	404				female_bins_95_identity___7225
group_11349	COG4785	Lipoprotein NlpI	1	1	1	1	210	1	270		1043	1043	1043				female_bins_95_identity___7226
group_1135			1	1	1	236	6	242	7		737	737	737	female_bins_95_identity___14526
group_11350	COG1434	Lipid carrier protein ElyC involved in cell wall biogenesis	1	1	1	1	211	1	271		746	746	746				female_bins_95_identity___7227
COG1075		Triacylglycerol esterase/lipase EstA	1	1	1	1	212	1	272		1370	1370	1370				female_bins_95_identity___7228
group_11352			1	1	1	1	213	1	273		1370	1370	1370				female_bins_95_identity___7229
group_11353			1	1	1	1	214	1	274		1307	1307	1307				female_bins_95_identity___7230
group_11354	COG0642	Signal transduction histidine kinase (BaeS) (PDB:1JOY)	1	1	1	1	215	1	275		2582	2582	2582				female_bins_95_identity___7231
group_11355			1	1	1	1	216	1	276		353	353	353				female_bins_95_identity___7232
group_11356	COG0840	Methyl-accepting chemotaxis protein (MCP) (Tar) (PDB:1QU7)	1	1	1	1	217	1	277		1472	1472	1472				female_bins_95_identity___7233
group_11357	COG0835	Chemotaxis signal transduction protein CheW (CheW) (PDB:2QDL)	1	1	1	1	218	1	278		542	542	542				female_bins_95_identity___7234
group_11358	COG0643	Chemotaxis protein histidine kinase CheA (CheA) (PDB:1B3Q)	1	1	1	1	219	1	279		2186	2186	2186				female_bins_95_identity___7235
group_11359	COG0745	DNA-binding response regulator	1	1	1	1	220	1	280		392	392	392				female_bins_95_identity___7236
group_1136			1	1	1	236	5	242	6		1496	1496	1496	female_bins_95_identity___14527
COG2201		Chemotaxis response regulator CheB	1	1	1	1	221	1	281		1034	1034	1034				female_bins_95_identity___7237
group_11361	COG1352	Methylase of chemotaxis methyl-accepting proteins (CheR) (PDB:1AF7)	1	1	1	1	222	1	282		821	821	821				female_bins_95_identity___7238
group_11362	COG3437	Response regulator c-di-GMP phosphodiesterase	1	1	1	1	223	1	283		1061	1061	1061				female_bins_95_identity___7239
group_11363			1	1	1	1	224	1	284		137	137	137				female_bins_95_identity___7240
group_11364	COG0642	Signal transduction histidine kinase (BaeS) (PDB:1JOY)	1	1	1	1	225	1	285		1436	1436	1436				female_bins_95_identity___7241
group_11365	COG2199	GGDEF domain	1	1	1	1	226	1	286		1097	1097	1097				female_bins_95_identity___7242
group_11366	COG1201	Lhr-like helicase (Lhr) (PDB:5V9X)	1	1	1	1	227	1	287		4136	4136	4136				female_bins_95_identity___7243
group_11367	COG0642	Signal transduction histidine kinase (BaeS) (PDB:1JOY)	1	1	1	1	228	1	288		3143	3143	3143				female_bins_95_identity___7244
group_11368	COG0730	Sulfite exporter TauE/SafE/YfcA and related permeases	1	1	1	1	229	1	289		767	767	767				female_bins_95_identity___7245
group_11369	COG0840	Methyl-accepting chemotaxis protein (MCP) (Tar) (PDB:1QU7)	1	1	1	1	230	1	290		2027	2027	2027				female_bins_95_identity___7246
group_1137	COG1187	Pseudouridylate synthase RsuA	1	1	1	236	4	242	5		1169	1169	1169	female_bins_95_identity___14528
group_11370	COG1686	D-alanyl-D-alanine carboxypeptidase (DacC) (PDB:1HD8)	1	1	1	1	231	1	291		1517	1517	1517				female_bins_95_identity___7247
group_11371			1	1	1	1	232	1	292		734	734	734				female_bins_95_identity___7248
COG2272		Carboxylesterase type B (PnbA) (PDB:1K4Y)	1	1	1	1	233	1	293		1559	1559	1559				female_bins_95_identity___7249
group_11373	COG0475	Kef-type K+ transport system	1	1	1	1	234	1	294		410	410	410				female_bins_95_identity___7250
group_11374			1	1	1	1	235	1	295		203	203	203				female_bins_95_identity___7251
group_11375			1	1	1	1	236	1	296		842	842	842				female_bins_95_identity___7252
group_11376	COG1961	Site-specific DNA recombinase SpoIVCA/DNA invertase PinE (SpoIVCA) (PDB:1GDT)	1	1	1	1	237	1	297		365	365	365				female_bins_95_identity___7253
group_11377	COG1961	Site-specific DNA recombinase SpoIVCA/DNA invertase PinE (SpoIVCA) (PDB:1GDT)	1	1	1	1	238	1	298		1559	1559	1559				female_bins_95_identity___7254
group_11378	COG1961	Site-specific DNA recombinase SpoIVCA/DNA invertase PinE (SpoIVCA) (PDB:1GDT)	1	1	1	1	239	1	299		1703	1703	1703				female_bins_95_identity___7255
group_11379	COG1961	Site-specific DNA recombinase SpoIVCA/DNA invertase PinE (SpoIVCA) (PDB:1GDT)	1	1	1	1	240	1	300		1667	1667	1667				female_bins_95_identity___7256
group_1138	COG0534	Na+-driven multidrug efflux pump	1	1	1	236	3	242	4		1322	1322	1322	female_bins_95_identity___14529
group_11380	COG2337	mRNA-degrading endonuclease MazF	1	1	1	1	24	1	324		863	863	863				female_bins_95_identity___7258
group_11381	COG1475	Chromosome segregation protein Spo0J	1	1	1	1	23	1	323		926	926	926				female_bins_95_identity___7259
group_11382			1	1	1	1	22	1	322		284	284	284				female_bins_95_identity___7260
group_11383	COG1191	DNA-directed RNA polymerase specialized sigma subunit (FliA) (PDB:1RP3)	1	1	1	1	21	1	321		449	449	449				female_bins_95_identity___7261
group_11384	COG0745	DNA-binding response regulator	1	1	1	1	20	1	320		704	704	704				female_bins_95_identity___7262
group_11385	COG3682	Transcriptional regulator	1	1	1	1	19	1	319		383	383	383				female_bins_95_identity___7263
COG2602		Beta-lactamase class D (YbxI) (PDB:5CTN)	1	1	1	1	18	1	318		1793	1793	1793				female_bins_95_identity___7264
group_11387			1	1	1	1	17	1	317		1262	1262	1262				female_bins_95_identity___7265
group_11388			1	1	1	1	16	1	316		1244	1244	1244				female_bins_95_identity___7266
group_11389			1	1	1	1	15	1	315		695	695	695				female_bins_95_identity___7267
group_1139	COG4783	Outer membrane protein chaperone/metalloprotease BepA/YfgC	1	1	1	236	2	242	3		1340	1340	1340	female_bins_95_identity___14530
group_11390			1	1	1	1	14	1	314		1295	1295	1295				female_bins_95_identity___7268
group_11391			1	1	1	1	13	1	313		1343	1343	1343				female_bins_95_identity___7269
group_11392			1	1	1	1	12	1	312		1127	1127	1127				female_bins_95_identity___7270
group_11393			1	1	1	1	11	1	311		1013	1013	1013				female_bins_95_identity___7271
group_11394			1	1	1	1	10	1	310		1133	1133	1133				female_bins_95_identity___7272
group_11395			1	1	1	1	9	1	309		671	671	671				female_bins_95_identity___7273
group_11396	COG0142	Geranylgeranyl pyrophosphate synthase (IspA) (PDB:2AZJ)	1	1	1	1	8	1	308		1028	1028	1028				female_bins_95_identity___7274
group_11397	COG4912	3-methyladenine DNA glycosylase AlkD (AlkD) (PDB:3JX7)	1	1	1	1	7	1	307		659	659	659				female_bins_95_identity___7275
group_11398			1	1	1	1	6	1	306		305	305	305				female_bins_95_identity___7276
group_11399			1	1	1	1	5	1	305		104	104	104				female_bins_95_identity___7277
group_114			1	1	1	441	1	440	1		1430	1430	1430		female_bins_95_identity___6948
group_1140	COG0188	DNA gyrase/topoisomerase IV	1	1	1	236	1	242	2		2567	2567	2567	female_bins_95_identity___14531
group_11400	COG4767	Glycopeptide antibiotics resistance protein (VanZ)	1	1	1	1	4	1	304		458	458	458				female_bins_95_identity___7278
group_11401			1	1	1	1	3	1	303		659	659	659				female_bins_95_identity___7279
group_11402			1	1	1	1	2	1	302		707	707	707				female_bins_95_identity___7280
group_11403	COG3290	Sensor histidine kinase DipB regulating citrate/malate metabolism (CitA)	1	1	1	1	1	1	301		350	350	350				female_bins_95_identity___7281
group_11404			1	1	1	386	2917	386	4885		725	725	725				female_bins_95_identity___7738
group_11405			1	1	1	386	2918	386	4886		509	509	509				female_bins_95_identity___7739
group_11406	COG5263	Glucan-binding domain (YG repeat) (PDB:1H09)	1	1	1	386	2919	386	4887		1139	1139	1139				female_bins_95_identity___7740
group_11407			1	1	1	386	2920	386	4888		422	422	422				female_bins_95_identity___7741
group_11408			1	1	1	386	2921	386	4889		401	401	401				female_bins_95_identity___7742
group_11409	COG1104	Cysteine desulfurase/Cysteine sulfinate desulfinase IscS or related enzyme	1	1	1	386	2922	386	4890		1139	1139	1139				female_bins_95_identity___7743
group_1141	COG4231	TPP-dependent indolepyruvate ferredoxin oxidoreductase	1	1	1	22	1	21	1		1592	1592	1592	female_bins_95_identity___14856
group_11410			1	1	1	386	2923	386	4891		785	785	785				female_bins_95_identity___7744
group_11411			1	1	1	386	2924	386	4892		719	719	719				female_bins_95_identity___7745
group_11412			1	1	1	386	2925	386	4893		752	752	752				female_bins_95_identity___7746
group_11413			1	1	1	386	2926	386	4894		2756	2756	2756				female_bins_95_identity___7747
group_11414			1	1	1	386	2927	386	4895		179	179	179				female_bins_95_identity___7748
group_11415			1	1	1	386	2928	386	4896		605	605	605				female_bins_95_identity___7749
group_11416			1	1	1	386	2929	386	4897		1406	1406	1406				female_bins_95_identity___7750
group_11417	COG1131	ABC-type multidrug transport system	1	1	1	386	2930	386	4898		971	971	971				female_bins_95_identity___7751
group_11418	COG0842	ABC-type multidrug transport system	1	1	1	386	2931	386	4899		914	914	914				female_bins_95_identity___7752
group_11419	COG3279	DNA-binding response regulator	1	1	1	386	2932	386	4900		437	437	437				female_bins_95_identity___7753
group_1142	COG1014	Pyruvate:ferredoxin oxidoreductase or related 2-oxoacid:ferredoxin oxidoreductase	1	1	1	22	2	21	2		587	587	587	female_bins_95_identity___14857
group_11420			1	1	1	386	2933	386	4901		245	245	245				female_bins_95_identity___7754
group_11421	COG1399	23S rRNA accumulation protein YceD (essential in plants	1	1	1	386	2934	386	4902		539	539	539				female_bins_95_identity___7755
group_11422	COG0333	Ribosomal protein L32 (RpmF) (PDB:1VS6) (PUBMED:17114934)	1	1	1	386	2935	386	4903		179	179	179				female_bins_95_identity___7756
group_11423			1	1	1	386	2936	386	4904		218	218	218				female_bins_95_identity___7757
COG2226		Ubiquinone/menaquinone biosynthesis C-methylase UbiE/MenG (UbiE) (PDB:4OBW)	1	1	1	386	2937	386	4905		290	290	290				female_bins_95_identity___7758
group_11425	COG2207	AraC-type DNA-binding domain and AraC-containing proteins (AraC) (PDB:1BL0)	1	1	1	386	2938	386	4906		260	260	260				female_bins_95_identity___7759
group_11426	COG2865	Predicted transcriptional regulator	1	1	1	386	2939	386	4907		1412	1412	1412				female_bins_95_identity___7760
group_11427	COG0416	Acyl-ACP:phosphate acyltransferase (fatty acid/phospholipid biosynthesis) (PlsX) (PDB:2GK3) (PUBMED:18992246)	1	1	1	386	2940	386	4908		1010	1010	1010				female_bins_95_identity___7761
group_11428	COG0236	Acyl carrier protein (AcpP) (PDB:1ACP)	1	1	1	386	2941	386	4909		239	239	239				female_bins_95_identity___7762
group_11429	COG0571	dsRNA-specific ribonuclease (Rnc) (PDB:1DI2)	1	1	1	386	2942	386	4910		692	692	692				female_bins_95_identity___7763
group_1143	COG0436	Aspartate/methionine/tyrosine aminotransferase (AspB) (PDB:2O0R)	1	1	1	22	3	21	3		1313	1313	1313	female_bins_95_identity___14858
group_11430	COG1196	Chromosome segregation ATPase Smc (Smc) (PDB:5XG3)	1	1	1	386	2943	386	4911		3602	3602	3602				female_bins_95_identity___7764
group_11431	COG0552	Signal recognition particle GTPase FtsY (FtsY) (PDB:4AK9)	1	1	1	386	2944	386	4912		929	929	929				female_bins_95_identity___7765
group_11432	COG1171	Threonine deaminase (IlvA) (PDB:3IAU)	1	1	1	386	2945	386	4913		1223	1223	1223				female_bins_95_identity___7766
group_11433	COG1284	Uncharacterized membrane-anchored protein YitT	1	1	1	386	2946	386	4914		854	854	854				female_bins_95_identity___7767
group_11434	COG3757	Lyzozyme M1 (1	1	1	1	386	2947	386	4915		1106	1106	1106				female_bins_95_identity___7768
group_11435	COG2207	AraC-type DNA-binding domain and AraC-containing proteins (AraC) (PDB:1BL0)	1	1	1	386	2948	386	4916		857	857	857				female_bins_95_identity___7769
group_11436			1	1	1	386	2949	386	4917		665	665	665				female_bins_95_identity___7770
group_11437	COG1835	Peptidoglycan/LPS O-acetylase OafA/YrhL	1	1	1	386	2950	386	4918		1106	1106	1106				female_bins_95_identity___7771
group_11438	COG0168	Trk-type K+ transport system	1	1	1	386	2951	386	4919		1361	1361	1361				female_bins_95_identity___7772
group_11439	COG0569	Trk/Ktr K+ transport system regulatory component TrkA/KtrA/KtrC	1	1	1	386	2952	386	4920		650	650	650				female_bins_95_identity___7773
group_1144	COG0427	Propionyl CoA:succinate CoA transferase (ACH1) (PDB:2G39) (PUBMED:10769117)	1	1	1	22	4	21	4		1295	1295	1295	female_bins_95_identity___14859
group_11440	COG1132	ABC-type multidrug transport system	1	1	1	386	2953	386	4921		1793	1793	1793				female_bins_95_identity___7774
COG1132		ABC-type multidrug transport system	1	1	1	386	2954	386	4922		1775	1775	1775				female_bins_95_identity___7775
group_11442	COG2739	Predicted DNA-binding protein YlxM	1	1	1	386	2955	386	4923		353	353	353				female_bins_95_identity___7776
COG0541		Signal recognition particle GTPase (Ffh) (PDB:2V3C)	1	1	1	386	2956	386	4924		1358	1358	1358				female_bins_95_identity___7777
group_11444	COG0228	Ribosomal protein S16 (RpsP) (PDB:4V4H)	1	1	1	386	2957	386	4925		248	248	248				female_bins_95_identity___7778
group_11445	COG1837	Predicted RNA-binding protein YlqC	1	1	1	386	2958	386	4926		227	227	227				female_bins_95_identity___7779
group_11446	COG0806	Ribosomal 30S subunit maturation factor RimM	1	1	1	386	2959	386	4927		575	575	575				female_bins_95_identity___7780
group_11447	COG0336	tRNA G37 N-methylase TrmD (TrmD) (PDB:1P9P)	1	1	1	386	2960	386	4928		818	818	818				female_bins_95_identity___7781
group_11448	COG0335	Ribosomal protein L19 (RplS) (PDB:1VS6) (PUBMED:27941785)	1	1	1	386	2961	386	4929		347	347	347				female_bins_95_identity___7782
group_11449	COG0681	Signal peptidase I (LepB) (PDB:1B12) (PUBMED:1925027)	1	1	1	386	2962	386	4930		584	584	584				female_bins_95_identity___7783
group_1145	COG3594	Fucose 4-O-acetylase or related acetyltransferase (NolL) (PUBMED:21697094)	1	1	1	22	5	21	5		1025	1025	1025	female_bins_95_identity___14860
COG1161		Ribosome biogenesis GTPase RbgA (RbgA) (PDB:6G14)	1	1	1	386	2963	386	4931		863	863	863				female_bins_95_identity___7784
group_11451	COG0681	Signal peptidase I (LepB) (PDB:1B12) (PUBMED:1925027)	1	1	1	386	2964	386	4932		539	539	539				female_bins_95_identity___7785
group_11452	COG0164	Ribonuclease HII (RnhB) (PDB:1EKE)	1	1	1	386	2965	386	4933		758	758	758				female_bins_95_identity___7786
COG3144		Flagellar hook-length control protein FliK (FliK) (PDB:2RRL)	1	1	1	386	2966	386	4934		1760	1760	1760				female_bins_95_identity___7787
group_11454	COG2257	Type III secretion system substrate exporter	1	1	1	386	2967	386	4935		290	290	290				female_bins_95_identity___7788
group_11455	COG0792	Predicted endonuclease distantly related to archaeal Holliday junction resolvase	1	1	1	386	2968	386	4936		407	407	407				female_bins_95_identity___7789
group_11456	COG1496	Copper oxidase (laccase) domain (YfiH) (PDB:1RV9)	1	1	1	386	2969	386	4937		866	866	866				female_bins_95_identity___7790
group_11457	COG0745	DNA-binding response regulator	1	1	1	386	2970	386	4938		692	692	692				female_bins_95_identity___7791
group_11458	COG0642	Signal transduction histidine kinase (BaeS) (PDB:1JOY)	1	1	1	386	2971	386	4939		2645	2645	2645				female_bins_95_identity___7792
group_11459			1	1	1	386	2972	386	4940		566	566	566				female_bins_95_identity___7793
group_1146			1	1	1	22	6	21	6		611	611	611	female_bins_95_identity___14861
group_11460	COG0078	Ornithine carbamoyltransferase (ArgF) (PDB:1A1S)	1	1	1	386	2973	386	4941		839	839	839				female_bins_95_identity___7794
group_11461	COG0462	Phosphoribosylpyrophosphate synthetase (PrsA) (PDB:1DKR)	1	1	1	386	2974	386	4942		1193	1193	1193				female_bins_95_identity___7795
group_11462	COG0745	DNA-binding response regulator	1	1	1	386	2975	386	4943		686	686	686				female_bins_95_identity___7796
group_11463	COG2205	K+-sensing histidine kinase KdpD (KdpD) (PDB:2KSF)	1	1	1	386	2976	386	4944		989	989	989				female_bins_95_identity___7797
group_11464	COG1136	ABC-type lipoprotein export system	1	1	1	386	2977	386	4945		689	689	689				female_bins_95_identity___7798
group_11465	COG4591	ABC-type transport system involved in lipoprotein release	1	1	1	386	2978	386	4946		2507	2507	2507				female_bins_95_identity___7799
group_11466	COG1625	Fe-S oxidoreductase	1	1	1	386	2979	386	4947		1361	1361	1361				female_bins_95_identity___7800
group_11467	COG1160	Double Era-like domain GTPase Der (Der) (PDB:1MKY)	1	1	1	386	2980	386	4948		1337	1337	1337				female_bins_95_identity___7801
group_11468	COG0344	Phospholipid biosynthesis protein PlsY	1	1	1	386	2981	386	4949		731	731	731				female_bins_95_identity___7802
group_11469			1	1	1	386	2982	386	4950		338	338	338				female_bins_95_identity___7803
group_1147	COG0086	DNA-directed RNA polymerase	1	1	1	22	7	21	7		4259	4259	4259	female_bins_95_identity___14862
group_11470	COG0372	Citrate synthase (GltA) (PDB:3TQG) (PUBMED:25211225)	1	1	1	386	2983	386	4951		1373	1373	1373				female_bins_95_identity___7804
group_11471	COG0274	Deoxyribose-phosphate aldolase (DeoC) (PDB:1J2W)	1	1	1	386	2984	386	4952		686	686	686				female_bins_95_identity___7805
group_11472	COG0006	Xaa-Pro aminopeptidase (PepP) (PDB:1A16)	1	1	1	386	2985	386	4953		1793	1793	1793				female_bins_95_identity___7806
group_11473			1	1	1	386	2986	386	4954		314	314	314				female_bins_95_identity___7807
group_11474			1	1	1	386	2987	386	4955		995	995	995				female_bins_95_identity___7808
group_11475	COG3874	Uncharacterized spore protein YtfJ (YtfJ)	1	1	1	386	2988	386	4956		401	401	401				female_bins_95_identity___7809
group_11476			1	1	1	386	2989	386	4957		551	551	551				female_bins_95_identity___7810
COG0227		Ribosomal protein L28 (RpmB) (PDB:2JZ6)	1	1	1	386	2990	386	4958		185	185	185				female_bins_95_identity___7811
group_11478	COG1866	Phosphoenolpyruvate carboxykinase	1	1	1	386	2991	386	4959		1715	1715	1715				female_bins_95_identity___7812
group_11479	COG1305	Transglutaminase-like enzyme	1	1	1	386	2992	386	4960		935	935	935				female_bins_95_identity___7813
group_1148	COG0085	DNA-directed RNA polymerase	1	1	1	22	8	21	8		3860	3860	3860	female_bins_95_identity___14863
group_11480	COG2385	Peptidoglycan hydrolase (amidase) enhancer domain SpoIID (SpoIID)	1	1	1	386	2993	386	4961		2297	2297	2297				female_bins_95_identity___7814
group_11481	COG1295	Uncharacterized membrane protein	1	1	1	386	2994	386	4962		857	857	857				female_bins_95_identity___7815
group_11482	COG0016	Phenylalanyl-tRNA synthetase alpha subunit (PheS) (PDB:3L4G)	1	1	1	386	2995	386	4963		1019	1019	1019				female_bins_95_identity___7816
group_11483	COG0072	Phenylalanyl-tRNA synthetase beta subunit (PheT) (PDB:3L4G)	1	1	1	386	2996	386	4964		2429	2429	2429				female_bins_95_identity___7817
group_11484	COG1362	Aspartyl aminopeptidase (LAP4) (PDB:1Y7E)	1	1	1	386	2997	386	4965		1439	1439	1439				female_bins_95_identity___7818
group_11485	COG0809	S-adenosylmethionine:tRNA-ribosyltransferase-isomerase (queuine synthetase) (QueA) (PDB:1VKY)	1	1	1	386	2998	386	4966		1064	1064	1064				female_bins_95_identity___7819
group_11486			1	1	1	386	2999	386	4967		344	344	344				female_bins_95_identity___7820
group_11487			1	1	1	386	3000	386	4968		503	503	503				female_bins_95_identity___7821
group_11488	COG0128	5-enolpyruvylshikimate-3-phosphate synthase (AroA) (PDB:4N3P)	1	1	1	386	3001	386	4969		1298	1298	1298				female_bins_95_identity___7822
group_11489	COG0287	Prephenate dehydrogenase (TyrA) (PDB:2F1K)	1	1	1	386	3002	386	4970		1100	1100	1100				female_bins_95_identity___7823
COG0222		Ribosomal protein L7/L12 (RplL) (PDB:1CTF)	1	1	1	22	9	21	9		377	377	377	female_bins_95_identity___14864
group_11490	COG0480	Translation elongation factor EF-G	1	1	1	386	3003	386	4971		2087	2087	2087				female_bins_95_identity___7824
group_11491	COG0495	Leucyl-tRNA synthetase (LeuS) (PDB:6LPF)	1	1	1	386	3004	386	4972		2408	2408	2408				female_bins_95_identity___7825
group_11492			1	1	1	386	3005	386	4973		269	269	269				female_bins_95_identity___7826
group_11493			1	1	1	386	3006	386	4974		485	485	485				female_bins_95_identity___7827
COG2200		EAL domain	1	1	1	386	3007	386	4975		1904	1904	1904				female_bins_95_identity___7828
group_11495			1	1	1	386	3008	386	4976		1268	1268	1268				female_bins_95_identity___7829
group_11496	COG4656	Na+-translocating ferredoxin:NAD+ oxidoreductase RNF	1	1	1	386	3009	386	4977		1316	1316	1316				female_bins_95_identity___7830
COG4658		Na+-translocating ferredoxin:NAD+ oxidoreductase RNF	1	1	1	386	3010	386	4978		932	932	932				female_bins_95_identity___7831
group_11498	COG4659	Na+-translocating ferredoxin:NAD+ oxidoreductase RNF	1	1	1	386	3011	386	4979		608	608	608				female_bins_95_identity___7832
group_11499	COG4660	Na+-translocating ferredoxin:NAD+ oxidoreductase RNF	1	1	1	386	3012	386	4980		719	719	719				female_bins_95_identity___7833
group_115	COG3209	Uncharacterized conserved protein RhaS	1	1	1	410	13	410	13		3260	3260	3260		female_bins_95_identity___15214
group_1150	COG0244	Ribosomal protein L10 (RplJ) (PDB:5IT8)	1	1	1	22	10	21	10		524	524	524	female_bins_95_identity___14865
group_11500	COG4657	Na+-translocating ferredoxin:NAD+ oxidoreductase RNF	1	1	1	386	3013	386	4981		578	578	578				female_bins_95_identity___7834
group_11501	COG2221	Dissimilatory sulfite reductase (desulfoviridin)	1	1	1	386	3014	386	4982		797	797	797				female_bins_95_identity___7835
group_11502	COG1453	Predicted oxidoreductase of the aldo/keto reductase family	1	1	1	386	3015	386	4983		1025	1025	1025				female_bins_95_identity___7836
group_11503	COG3279	DNA-binding response regulator	1	1	1	386	3016	386	4984		734	734	734				female_bins_95_identity___7837
group_11504	COG3290	Sensor histidine kinase DipB regulating citrate/malate metabolism (CitA)	1	1	1	386	3017	386	4985		1298	1298	1298				female_bins_95_identity___7838
group_11505			1	1	1	386	3018	386	4986		587	587	587				female_bins_95_identity___7839
group_11506			1	1	1	386	3019	386	4987		155	155	155				female_bins_95_identity___7840
group_11507			1	1	1	386	3020	386	4988		887	887	887				female_bins_95_identity___7841
group_11508	COG1477	FAD:protein FMN transferase ApbE (ApbE) (PDB:1VRM) (PUBMED:23558683	1	1	1	386	3021	386	4989		1028	1028	1028				female_bins_95_identity___7842
group_11509	COG3757	Lyzozyme M1 (1	1	1	1	386	3022	386	4990		1169	1169	1169				female_bins_95_identity___7843
group_1151	COG0081	Ribosomal protein L1 (RplA) (PDB:3J65)	1	1	1	22	11	21	11		698	698	698	female_bins_95_identity___14866
group_11510			1	1	1	386	3023	386	4991		794	794	794				female_bins_95_identity___7844
group_11511	COG3773	Cell wall hydrolase CwlJ	1	1	1	386	3024	386	4992		620	620	620				female_bins_95_identity___7845
COG0498		Threonine synthase (ThrC) (PDB:1VB3)	1	1	1	386	3025	386	4993		1496	1496	1496				female_bins_95_identity___7846
group_11513	COG0240	Glycerol-3-phosphate dehydrogenase (GpsA) (PDB:1EVY)	1	1	1	386	3026	386	4994		1016	1016	1016				female_bins_95_identity___7847
group_11514	COG0685	5	1	1	1	386	3027	386	4995		854	854	854				female_bins_95_identity___7848
group_11515	COG0714	MoxR-like ATPase (MoxR) (PDB:2R44)	1	1	1	386	3028	386	4996		821	821	821				female_bins_95_identity___7849
group_11516	COG3825	Uncharacterized CoxE-like protein	1	1	1	386	3029	386	4997		1205	1205	1205				female_bins_95_identity___7850
group_11517			1	1	1	386	3030	386	4998		185	185	185				female_bins_95_identity___7851
group_11518	COG0162	Tyrosyl-tRNA synthetase (TyrS) (PDB:4OUD)	1	1	1	386	3031	386	4999		1226	1226	1226				female_bins_95_identity___7852
group_11519	COG0119	Isopropylmalate/homocitrate/citramalate synthases (LeuA) (PDB:4JN6)	1	1	1	386	3032	386	5000		977	977	977				female_bins_95_identity___7853
COG0080		Ribosomal protein L11 (RplK) (PDB:2E34)	1	1	1	22	12	21	12		440	440	440	female_bins_95_identity___14867
group_11520	COG0082	Chorismate synthase (AroC) (PDB:1Q1L)	1	1	1	386	3033	386	5001		1100	1100	1100				female_bins_95_identity___7854
group_11521	COG1876	LD-carboxypeptidase LdcB	1	1	1	386	3034	386	5002		1226	1226	1226				female_bins_95_identity___7855
group_11522	COG0343	Queuine/archaeosine tRNA-ribosyltransferase (Tgt) (PDB:1XW8) (PUBMED:15805528)	1	1	1	386	3035	386	5003		1121	1121	1121				female_bins_95_identity___7856
group_11523	COG1862	Protein translocase subunit YajC (YajC)	1	1	1	386	3036	386	5004		308	308	308				female_bins_95_identity___7857
group_11524	COG0473	Isocitrate/isopropylmalate dehydrogenase (LeuB) (PDB:1GC9)	1	1	1	386	3037	386	5005		1085	1085	1085				female_bins_95_identity___7858
group_11525			1	1	1	386	3038	386	5006		1565	1565	1565				female_bins_95_identity___7859
group_11526	COG0129	Dihydroxyacid dehydratase/phosphogluconate dehydratase (IlvD) (PDB:2GP4)	1	1	1	386	3039	386	5007		1673	1673	1673				female_bins_95_identity___7860
group_11527	COG0028	Acetolactate synthase large subunit or other thiamine pyrophosphate-requiring enzyme (IlvB) (PDB:1BFD)	1	1	1	386	3040	386	5008		1673	1673	1673				female_bins_95_identity___7861
group_11528	COG1376	Lipoprotein-anchoring transpeptidase ErfK/SrfK (ErfK) (PDB:4LZH)	1	1	1	386	3041	386	5009		1394	1394	1394				female_bins_95_identity___7862
group_11529	COG1932	Phosphoserine aminotransferase (SerC) (PDB:1BJN)	1	1	1	386	3042	386	5010		1082	1082	1082				female_bins_95_identity___7863
group_1153	COG0250	Transcription termination/antitermination protein NusG (NusG) (PDB:3EWG) (PUBMED:19500594)	1	1	1	22	13	21	13		560	560	560	female_bins_95_identity___14868
group_11530	COG0111	Phosphoglycerate dehydrogenase or related dehydrogenase (SerA) (PDB:3OET)	1	1	1	386	3043	386	5011		1163	1163	1163				female_bins_95_identity___7864
group_11531			1	1	1	386	3044	386	5012		254	254	254				female_bins_95_identity___7865
group_11532	COG4198	Uncharacterized conserved protein	1	1	1	386	3045	386	5013		1256	1256	1256				female_bins_95_identity___7866
group_11533	COG0296	1	1	1	1	386	3046	386	5014		2519	2519	2519				female_bins_95_identity___7867
group_11534	COG0668	Small-conductance mechanosensitive channel (MscS) (PDB:2OAU)	1	1	1	386	3047	386	5015		869	869	869				female_bins_95_identity___7868
group_11535			1	1	1	386	3048	386	5016		425	425	425				female_bins_95_identity___7869
group_11536	COG1328	Anaerobic ribonucleoside-triphosphate reductase (NrdD) (PDB:4COI)	1	1	1	386	3049	386	5017		2162	2162	2162				female_bins_95_identity___7870
group_11537	COG0602	Organic radical activating enzyme NrdG/QueE (QueE) (PUBMED:14660578	1	1	1	386	3050	386	5018		527	527	527				female_bins_95_identity___7871
group_11538			1	1	1	386	3051	386	5019		161	161	161				female_bins_95_identity___7872
group_11539	COG1961	Site-specific DNA recombinase SpoIVCA/DNA invertase PinE (SpoIVCA) (PDB:1GDT)	1	1	1	386	3052	386	5020		1892	1892	1892				female_bins_95_identity___7873
group_1154	COG0690	Preprotein translocase subunit SecE (SecE) (PDB:5MG3) (PUBMED:29684280)	1	1	1	22	14	21	14		197	197	197	female_bins_95_identity___14869
group_11540	COG2050	Acyl-CoA thioesterase PaaI	1	1	1	386	3053	386	5021		404	404	404				female_bins_95_identity___7874
group_11541	COG0318	O-succinylbenzoic acid-CoA ligase MenE or related acyl-CoA synthetase (AMP-forming) (MenE/FadK) (PDB:5EY9) (PUBMED:25151136	1	1	1	386	3054	386	5022		1637	1637	1637				female_bins_95_identity___7875
group_11542	COG0591	Na+/proline symporter (PutP) (PDB:5NVA)	1	1	1	386	3055	386	5023		1550	1550	1550				female_bins_95_identity___7876
COG4231		TPP-dependent indolepyruvate ferredoxin oxidoreductase	1	1	1	386	3056	386	5024		1736	1736	1736				female_bins_95_identity___7877
group_11544	COG1014	Pyruvate:ferredoxin oxidoreductase or related 2-oxoacid:ferredoxin oxidoreductase	1	1	1	386	3057	386	5025		572	572	572				female_bins_95_identity___7878
group_11545	COG1541	Phenylacetate-coenzyme A ligase PaaK	1	1	1	386	3058	386	5026		1298	1298	1298				female_bins_95_identity___7879
COG4747		ACT domain-containing protein (ACTx2)	1	1	1	386	3059	386	5027		431	431	431				female_bins_95_identity___7880
group_11547			1	1	1	386	3060	386	5028		236	236	236				female_bins_95_identity___7881
group_11548	COG1116	ABC-type nitrate/sulfonate/bicarbonate transport system	1	1	1	386	3061	386	5029		779	779	779				female_bins_95_identity___7882
group_11549	COG0165	Argininosuccinate lyase (ArgH) (PDB:1AOS)	1	1	1	386	3062	386	5030		1379	1379	1379				female_bins_95_identity___7883
group_1155	COG0050	Translation elongation factor EF-Tu	1	1	1	22	15	21	15		1187	1187	1187	female_bins_95_identity___14870
group_11550	COG0136	Aspartate-semialdehyde dehydrogenase (Asd) (PDB:1BRM)	1	1	1	386	3063	386	5031		1085	1085	1085				female_bins_95_identity___7884
group_11551	COG2202	PAS domain (PAS) (PDB:2MWG)	1	1	1	386	3064	386	5032		1724	1724	1724				female_bins_95_identity___7885
COG1672		Predicted ATPase	1	1	1	386	3065	386	5033		1397	1397	1397				female_bins_95_identity___7886
group_11553	COG0550	DNA topoisomerase IA (TopA) (PDB:1CY0)	1	1	1	386	3066	386	5034		2030	2030	2030				female_bins_95_identity___7887
group_11554	COG1207	Bifunctional protein GlmU	1	1	1	386	3067	386	5035		680	680	680				female_bins_95_identity___7888
group_11555	COG2199	GGDEF domain	1	1	1	386	3068	386	5036		2216	2216	2216				female_bins_95_identity___7889
group_11556	COG0822	Fe-S cluster assembly scaffold protein IscU	1	1	1	386	3069	386	5037		692	692	692				female_bins_95_identity___7890
group_11557			1	1	1	386	3070	386	5038		1010	1010	1010				female_bins_95_identity___7891
group_11558	COG1475	Chromosome segregation protein Spo0J	1	1	1	386	3071	386	5039		563	563	563				female_bins_95_identity___7892
group_11559	COG3969	Predicted phosphoadenosine phosphosulfate sulfurtransferase	1	1	1	386	3072	386	5040		1322	1322	1322				female_bins_95_identity___7893
group_1156			1	1	1	22	16	21	16		110	110	110	female_bins_95_identity___14871
group_11560			1	1	1	386	3073	386	5041		299	299	299				female_bins_95_identity___7894
group_11561			1	1	1	386	3074	386	5042		1994	1994	1994				female_bins_95_identity___7895
group_11562	COG0727	Uncharacterized protein YkgJ	1	1	1	386	3075	386	5043		638	638	638				female_bins_95_identity___7896
group_11563	COG0673	Predicted dehydrogenase (MviM) (PDB:3UUW)	1	1	1	386	3076	386	5044		980	980	980				female_bins_95_identity___7897
group_11564			1	1	1	386	3077	386	5045		497	497	497				female_bins_95_identity___7898
group_11565	COG0687	Spermidine/putrescine-binding periplasmic protein (PotD) (PDB:1POT)	1	1	1	386	3078	386	5046		1052	1052	1052				female_bins_95_identity___7899
group_11566	COG1177	ABC-type spermidine/putrescine transport system	1	1	1	386	3079	386	5047		773	773	773				female_bins_95_identity___7900
group_11567	COG1176	ABC-type spermidine/putrescine transport system	1	1	1	386	3080	386	5048		845	845	845				female_bins_95_identity___7901
group_11568	COG3842	ABC-type Fe3+/spermidine/putrescine transport systems	1	1	1	386	3081	386	5049		1073	1073	1073				female_bins_95_identity___7902
group_11569	COG1396	Transcriptional regulator	1	1	1	386	3082	386	5050		557	557	557				female_bins_95_identity___7903
group_1157	COG1983	Phage shock protein PspC (stress-responsive transcriptional regulator) (PspC)	1	1	1	22	17	21	17		203	203	203	female_bins_95_identity___14872
group_11570	COG2706	6-phosphogluconolactonase	1	1	1	386	3083	386	5051		1061	1061	1061				female_bins_95_identity___7904
group_11571	COG0720	6-pyruvoyl-tetrahydropterin synthase (QueD) (PDB:1B66) (PUBMED:14660578	1	1	1	386	3084	386	5052		2426	2426	2426				female_bins_95_identity___7905
group_11572			1	1	1	386	3085	386	5053		1514	1514	1514				female_bins_95_identity___7906
group_11573			1	1	1	386	3086	386	5054		476	476	476				female_bins_95_identity___7907
group_11574			1	1	1	386	3087	386	5055		608	608	608				female_bins_95_identity___7908
group_11575	COG1215	Glycosyltransferase	1	1	1	386	3088	386	5056		1379	1379	1379				female_bins_95_identity___7909
COG0720		6-pyruvoyl-tetrahydropterin synthase (QueD) (PDB:1B66) (PUBMED:14660578	1	1	1	386	3089	386	5057		449	449	449				female_bins_95_identity___7910
COG5831		Stage IV sporulation protein SpoIVA	1	1	1	386	3090	386	5058		1547	1547	1547				female_bins_95_identity___7911
group_11578	COG0005	Purine nucleoside phosphorylase (XapA) (PDB:1YQQ)	1	1	1	386	3091	386	5059		1073	1073	1073				female_bins_95_identity___7912
group_11579	COG0295	Cytidine deaminase (Cdd) (PDB:1AF2)	1	1	1	386	3092	386	5060		446	446	446				female_bins_95_identity___7913
group_1158	COG1695	DNA-binding transcriptional regulator	1	1	1	22	18	21	18		377	377	377	female_bins_95_identity___14873
group_11580	COG0402	Cytosine/adenosine deaminase or related metal-dependent hydrolase (SsnA) (PDB:3O7U)	1	1	1	386	3093	386	5061		1358	1358	1358				female_bins_95_identity___7914
group_11581	COG0249	DNA mismatch repair ATPase MutS (MutS) (PDB:1E3M)	1	1	1	386	3094	386	5062		1706	1706	1706				female_bins_95_identity___7915
group_11582	COG0328	Ribonuclease HI (RnhA) (PDB:1LAW)	1	1	1	386	3095	386	5063		485	485	485				female_bins_95_identity___7916
group_11583			1	1	1	386	3096	386	5064		173	173	173				female_bins_95_identity___7917
group_11584	COG1011	FMN and 5-amino-6-(5-phospho-D-ribitylamino)uracil phosphatase YigB	1	1	1	386	3097	386	5065		833	833	833				female_bins_95_identity___7918
group_11585	COG2378	Predicted DNA-binding transcriptional regulator YobV	1	1	1	386	3098	386	5066		992	992	992				female_bins_95_identity___7919
group_11586	COG1328	Anaerobic ribonucleoside-triphosphate reductase (NrdD) (PDB:4COI)	1	1	1	386	3099	386	5067		2189	2189	2189				female_bins_95_identity___7920
group_11587	COG0602	Organic radical activating enzyme NrdG/QueE (QueE) (PUBMED:14660578	1	1	1	386	3100	386	5068		503	503	503				female_bins_95_identity___7921
group_11588	COG0756	dUTP pyrophosphatase (dUTPase) (Dut) (PDB:1DUC)	1	1	1	386	3101	386	5069		440	440	440				female_bins_95_identity___7922
group_11589	COG5840	Stage V sporulation protein SpoVAF	1	1	1	386	3102	386	5070		1421	1421	1421				female_bins_95_identity___7923
group_1159			1	1	1	22	19	21	19		836	836	836	female_bins_95_identity___14874
group_11590	COG2755	Lysophospholipase L1 or related esterase. Includes spore coat protein LipC/YcsK (TesA) (PDB:1BWP)	1	1	1	386	3103	386	5071		1112	1112	1112				female_bins_95_identity___7924
group_11591	COG0840	Methyl-accepting chemotaxis protein (MCP) (Tar) (PDB:1QU7)	1	1	1	386	3104	386	5072		2111	2111	2111				female_bins_95_identity___7925
group_11592	COG1482	Mannose-6-phosphate isomerase	1	1	1	386	3105	386	5073		2306	2306	2306				female_bins_95_identity___7926
group_11593	COG3279	DNA-binding response regulator	1	1	1	386	3106	386	5074		713	713	713				female_bins_95_identity___7927
group_11594	COG2972	Sensor histidine kinase YesM (YesM)	1	1	1	386	3107	386	5075		1427	1427	1427				female_bins_95_identity___7928
group_11595			1	1	1	386	3108	386	5076		494	494	494				female_bins_95_identity___7929
COG2818		3-methyladenine DNA glycosylase Tag (Tag) (PDB:1LMZ)	1	1	1	386	3109	386	5077		581	581	581				female_bins_95_identity___7930
group_11597	COG1670	Protein N-acetyltransferase	1	1	1	386	3110	386	5078		869	869	869				female_bins_95_identity___7931
group_11598	COG1472	Periplasmic beta-glucosidase and related glycosidases (BglX) (PDB:2X40)	1	1	1	386	3111	386	5079		2840	2840	2840				female_bins_95_identity___7932
group_11599	COG0745	DNA-binding response regulator	1	1	1	386	3112	386	5080		671	671	671				female_bins_95_identity___7933
group_1160	COG1983	Phage shock protein PspC (stress-responsive transcriptional regulator) (PspC)	1	1	1	22	20	21	99		1223	1223	1223	female_bins_95_identity___14875
group_11600	COG0642	Signal transduction histidine kinase (BaeS) (PDB:1JOY)	1	1	1	386	3113	386	5081		1100	1100	1100				female_bins_95_identity___7934
group_11601	COG1136	ABC-type lipoprotein export system	1	1	1	386	3114	386	5082		698	698	698				female_bins_95_identity___7935
group_11602	COG4591	ABC-type transport system involved in lipoprotein release	1	1	1	386	3115	386	5083		2501	2501	2501				female_bins_95_identity___7936
[truncated: 17,981 more rows]

## Sheet: common_set_females
Gene	Non-unique Gene name	Annotation	No. isolates	No. sequences	Avg sequences per isolate	Genome Fragment	Order within Fragment	Accessory Fragment	Accessory Order with Fragment	QC	Min group size nuc	Max group size nuc	Avg group size nuc	Alistipes_sp009774895	COE1_sp002358575	COE1_sp009774375	Clostridia	Lawsonibacter	UBA7173_sp001689485	UBA7173_sp002491305
COG0048		Ribosomal protein S12 (RpsL) (PDB:4V4H)	2	2	1	11	1	11	5		389	389	389						female_bins_95_identity___6837	female_bins_95_identity___6229
COG0100		Ribosomal protein S11 (RpsK) (PDB:4V4H)	2	2	1	11	9	11	1		389	389	389						female_bins_95_identity___6866	female_bins_95_identity___10536
COG0236		Acyl carrier protein (AcpP) (PDB:1ACP)	2	2	1	8	1	5	1	Investigate	233	236	234						female_bins_95_identity___10450	female_bins_95_identity___1713
COG0238		Ribosomal protein S18 (RpsR) (PDB:4V4H)	2	2	1	9	1	6	1	Investigate	269	269	269						female_bins_95_identity___390	female_bins_95_identity___15224
COG0267		Ribosomal protein L33 (RpmG) (PDB:1VS6)	2	2	1	7	2	7	2	Investigate	188	188	188						female_bins_95_identity___19386	female_bins_95_identity___18026
COG0292		Ribosomal protein L20 (RplT) (PDB:1VS6) (PUBMED:30270044)	2	2	1	2	1	2	1	Investigate	350	350	350						female_bins_95_identity___19995	female_bins_95_identity___7677
COG0450		Alkyl hydroperoxide reductase subunit AhpC (peroxiredoxin) (AhpC) (PDB:2RII)	2	2	1	3	1	4	1	Investigate	566	566	566						female_bins_95_identity___6070	female_bins_95_identity___3676
COG0568		DNA-directed RNA polymerase	2	2	1	4	1	3	1	Investigate	860	860	860						female_bins_95_identity___18783	female_bins_95_identity___5492
COG0828		Ribosomal protein S21 (RpsU) (PDB:4V4H)	2	2	1	6	1	8	1	Investigate	191	290	240						female_bins_95_identity___9294	female_bins_95_identity___14830
COG0051		Ribosomal protein S10 (RpsJ) (PDB:4V4H)	2	2	1						305	305	305						female_bins_95_identity___6840	female_bins_95_identity___6232
COG0093		Ribosomal protein L14 (RplN) (PDB:4V4H)	2	2	1						365	365	365						female_bins_95_identity___6851	female_bins_95_identity___6243
group_298			2	2	1	1	1	9	1	Investigate	221	221	221						female_bins_95_identity___1513	female_bins_95_identity___1293
COG0254		Ribosomal protein L31 (RpmE) (PDB:1VS6)	2	2	1						254	254	254						female_bins_95_identity___4570	female_bins_95_identity___5473
COG0776		Bacterial nucleoid DNA-binding protein IHF-alpha (HimA) (PDB:1B8Z)	2	2	1						272	275	273						female_bins_95_identity___4585	female_bins_95_identity___1224
COG0052		Ribosomal protein S2 (RpsB) (PDB:4V4H)	2	2	1						836	836	836						female_bins_95_identity___4605	female_bins_95_identity___6213
COG0049		Ribosomal protein S7 (RpsG) (PDB:4V4H)	2	2	1						476	476	476						female_bins_95_identity___6838	female_bins_95_identity___6230
COG0480		Translation elongation factor EF-G	2	2	1						2126	2126	2126						female_bins_95_identity___6839	female_bins_95_identity___6231
COG0185		Ribosomal protein S19 (RpsS) (PDB:4V4H)	2	2	1						269	269	269						female_bins_95_identity___6845	female_bins_95_identity___6237
COG0092		Ribosomal protein S3 (RpsC) (PDB:1VS6)	2	2	1						734	749	741						female_bins_95_identity___6847	female_bins_95_identity___6239
COG0197		Ribosomal protein L16/L10AE (RplP) (PDB:1WKI)	2	2	1						431	431	431						female_bins_95_identity___6848	female_bins_95_identity___6240
COG0184		Ribosomal protein S15P/S13E (RpsO) (PDB:4V4H)	2	2	1						275	275	275						female_bins_95_identity___9867	female_bins_95_identity___19092
group_312			2	2	1	7	1	7	1	Investigate	149	149	149						female_bins_95_identity___19387	female_bins_95_identity___18025

## Sheet: gene_presence_absence_males
Gene	Non-unique Gene name	Annotation	No. isolates	No. sequences	Avg sequences per isolate	Genome Fragment	Order within Fragment	Accessory Fragment	Accessory Order with Fragment	QC	Min group size nuc	Max group size nuc	Avg group size nuc	Acetatifactor_sp011959105	Alistipes	CAG_56_sp004793585_REP1	CAG_56_sp004793585_REP2	COE1_sp002358575	COE1_sp009774375	Clostridia	Dubosiella_sp004793885	Kineothrix_sp000403275	Muribaculaceae	Paramuribaculum_sp001689565	RACS_045_sp013316135	UBA11940_sp013316055	UBA3282	UBA7173_sp001915385	UMGS1004_sp003343805	UMGS1994_sp900553945
COG0051		Ribosomal protein S10 (RpsJ) (PDB:4V4H)	6	6	1	1008	10468	1008	9806		317	317	317	male_bins_95_identity___9360				male_bins_95_identity___8678	male_bins_95_identity___10164	male_bins_95_identity___24319		male_bins_95_identity___9004					male_bins_95_identity___34025
COG0828		Ribosomal protein S21 (RpsU) (PDB:4V4H)	6	6	1	1008	8057	1008	8319		176	176	176	male_bins_95_identity___37164		male_bins_95_identity___26865		male_bins_95_identity___22245		male_bins_95_identity___14868		male_bins_95_identity___27459					male_bins_95_identity___40751
COG0093		Ribosomal protein L14 (RplN) (PDB:4V4H)	6	6	1	1008	10395	1008	9835		368	368	368	male_bins_95_identity___9371		male_bins_95_identity___39226		male_bins_95_identity___8690	male_bins_95_identity___10175	male_bins_95_identity___24330							male_bins_95_identity___34014
COG0636		FoF1-type ATP synthase	6	6	1	1008	4579	1008	3899		251	254	253	male_bins_95_identity___17988				male_bins_95_identity___7545	male_bins_95_identity___15088	male_bins_95_identity___4667		male_bins_95_identity___27496					male_bins_95_identity___26518
COG0199		Ribosomal protein S14 (RpsN) (PDB:4V4H)	5	5	1	1008	10374	1008	9838		185	185	185			male_bins_95_identity___39229		male_bins_95_identity___8693	male_bins_95_identity___10178	male_bins_95_identity___24333							male_bins_95_identity___34011
COG0653		Preprotein translocase subunit SecA (ATPase	5	5	1	1008	5057	1008	5466		506	2567	2154					male_bins_95_identity___16076	male_bins_95_identity___37483	male_bins_95_identity___31610		male_bins_95_identity___17284					male_bins_95_identity___2144
group_22			4	4	1	1008	5846	1008	1865		77	107	98					male_bins_95_identity___1458	male_bins_95_identity___37428	male_bins_95_identity___27044							male_bins_95_identity___33067
COG0211		Ribosomal protein L27 (RpmA) (PDB:1VS6)	4	4	1	1008	8383	1008	7220		284	287	285	male_bins_95_identity___30737						male_bins_95_identity___14742		male_bins_95_identity___24496					male_bins_95_identity___37788
COG1278		Cold shock protein	4	4	1	1008	7643	1008	7563		200	200	200	male_bins_95_identity___2299						male_bins_95_identity___34451		male_bins_95_identity___12968					male_bins_95_identity___5158
COG1077		Cell shape-determining ATPase MreB	3	3	1	1008	4112	1008	3628		989	992	991	male_bins_95_identity___14395						male_bins_95_identity___4621							male_bins_95_identity___26571
COG0361		Translation initiation factor IF-1 (InfA) (PDB:5FIM)	3	3	1	1008	10346	1008	9850		218	218	218	male_bins_95_identity___9385				male_bins_95_identity___8704	male_bins_95_identity___10189
COG0100		Ribosomal protein S11 (RpsK) (PDB:4V4H)	3	3	1	1008	320	1008	9567		392	395	394	male_bins_95_identity___9387		male_bins_95_identity___7384				male_bins_95_identity___24347
COG0822		Fe-S cluster assembly scaffold protein IscU	3	3	1	1008	8800	1008	833		692	692	692			male_bins_95_identity___18164				male_bins_95_identity___5560							male_bins_95_identity___29153
COG1094		rRNA processing protein Krr1/Pno1	3	3	1	1010	333	1010	524		1544	1562	1551	male_bins_95_identity___35494						male_bins_95_identity___13679		male_bins_95_identity___801
group_216			3	3	1	1008	9016	1008	8480		170	215	185					male_bins_95_identity___1498		male_bins_95_identity___5615							male_bins_95_identity___29207
group_25224	COG0051	Ribosomal protein S10 (RpsJ) (PDB:4V4H)	3	3	1	2	192	2	142		305	305	305										male_bins_95_identity___4037	male_bins_95_identity___16577				male_bins_95_identity___36989
COG0267		Ribosomal protein L33 (RpmG) (PDB:1VS6)	3	3	1	6	146	6	137		188	188	188										male_bins_95_identity___35990	male_bins_95_identity___39693				male_bins_95_identity___19887
COG1882		Pyruvate-formate lyase (PflD) (PDB:1CM5)	3	3	1	1008	4183	1008	3700		242	245	243							male_bins_95_identity___4646		male_bins_95_identity___2966					male_bins_95_identity___26545
COG0048		Ribosomal protein S12 (RpsL) (PDB:4V4H)	3	3	1	2	117	2	136		383	389	385										male_bins_95_identity___4034	male_bins_95_identity___16580				male_bins_95_identity___36992
COG1192		ParA-like ATPase involved in chromosome/plasmid partitioning or cellulose biosynthesis protein BcsQ (ParA) (PDB:6NOO)	3	3	1	1008	7132	1008	8159		95	785	555	male_bins_95_identity___100				male_bins_95_identity___3768		male_bins_95_identity___6612
COG5852		Small acid-soluble spore protein SspA/SspB/SspC/SspD (alpha/beta-type) (SspA/SspB/SspC/SspD) (PUBMED:3009398	3	3	1	1009	1263	1009	536		200	200	200							male_bins_95_identity___11050		male_bins_95_identity___17263					male_bins_95_identity___15494
group_507	COG0093	Ribosomal protein L14 (RplN) (PDB:4V4H)	3	3	1	2	177	2	165		365	365	365										male_bins_95_identity___4048	male_bins_95_identity___36827				male_bins_95_identity___36978
COG0257		Ribosomal protein L36 (RpmJ) (PDB:1DFE) (PUBMED:21627333)	3	3	1	2	146	2	193		116	116	116										male_bins_95_identity___4061	male_bins_95_identity___36840				male_bins_95_identity___36966
group_510	COG0100	Ribosomal protein S11 (RpsK) (PDB:4V4H)	3	3	1	2	139	2	195		389	389	389										male_bins_95_identity___4063	male_bins_95_identity___36842				male_bins_95_identity___36964
COG0057		Glyceraldehyde-3-phosphate dehydrogenase/erythrose-4-phosphate dehydrogenase (GapA) (PDB:3ZDF)	3	3	1	3	120	3	81		1007	1010	1009										male_bins_95_identity___17413	male_bins_95_identity___23846				male_bins_95_identity___13254
COG1396		Transcriptional regulator	3	3	1	1823	29	1823	75		344	398	363			male_bins_95_identity___21794				male_bins_95_identity___20334							male_bins_95_identity___31911
group_55			3	3	1	1009	308	1009	960		206	659	458			male_bins_95_identity___32255	male_bins_95_identity___20306			male_bins_95_identity___12517
group_63			3	3	1	1008	9042	1008	6231		341	341	341					male_bins_95_identity___1497		male_bins_95_identity___5614							male_bins_95_identity___29206
COG1961		Site-specific DNA recombinase SpoIVCA/DNA invertase PinE (SpoIVCA) (PDB:1GDT)	3	3	1	1008	9015	1008	8479		1508	1523	1513					male_bins_95_identity___1499		male_bins_95_identity___5616		male_bins_95_identity___14052
group_65			3	3	1	1756	83	1756	108		143	149	146					male_bins_95_identity___10078	male_bins_95_identity___2860			male_bins_95_identity___5841
COG0393		Uncharacterized pentameric protein YbjQ	3	3	1	1008	2430	1008	5134		311	314	312					male_bins_95_identity___13750	male_bins_95_identity___26187								male_bins_95_identity___9234
group_70	COG1882	Pyruvate-formate lyase (PflD) (PDB:1CM5)	3	3	1	1008	4185	1008	3702		107	2039	1395							male_bins_95_identity___4648		male_bins_95_identity___2964					male_bins_95_identity___26543
COG0330		Regulator of protease activity HflC	3	3	1	1008	7048	1008	8080		920	923	922							male_bins_95_identity___6602		male_bins_95_identity___9039					male_bins_95_identity___28349
COG0568		DNA-directed RNA polymerase	3	3	1	1009	1010	1009	716		1112	1112	1112							male_bins_95_identity___8647		male_bins_95_identity___10261					male_bins_95_identity___4135
COG5016		Pyruvate/oxaloacetate carboxyltransferase (OadA1) (PDB:2NX9) (PUBMED:18681940)	3	3	1	1008	8072	1008	7385		1427	1427	1427							male_bins_95_identity___14844		male_bins_95_identity___27447					male_bins_95_identity___37956
COG1582		Swarming motility protein SwrD (SwrD) (PUBMED:29061663)	3	3	1	1008	6753	1008	6679		185	185	185							male_bins_95_identity___32380		male_bins_95_identity___27380					male_bins_95_identity___19828
COG0085		DNA-directed RNA polymerase	3	3	1	2	60	2	81		578	3815	2735										male_bins_95_identity___4024	male_bins_95_identity___28243				male_bins_95_identity___36186
COG0050		Translation elongation factor EF-Tu	3	3	1	2	91	2	124		215	1184	861										male_bins_95_identity___4031	male_bins_95_identity___28250				male_bins_95_identity___36218
COG0197		Ribosomal protein L16/L10AE (RplP) (PDB:1WKI)	3	3	1	2	180	2	162		431	431	431										male_bins_95_identity___4045	male_bins_95_identity___36824				male_bins_95_identity___36981
COG0099		Ribosomal protein S13 (RpsM) (PDB:4V4H)	3	3	1	2	140	2	194		380	380	380										male_bins_95_identity___4062	male_bins_95_identity___36841				male_bins_95_identity___36965
group_86	COG0828	Ribosomal protein S21 (RpsU) (PDB:4V4H)	3	3	1	8	51	8	121		191	191	191										male_bins_95_identity___16531	male_bins_95_identity___3077				male_bins_95_identity___24824
COG0238		Ribosomal protein S18 (RpsR) (PDB:4V4H)	3	3	1	5	82	5	157		263	269	267										male_bins_95_identity___25397	male_bins_95_identity___39654				male_bins_95_identity___3220
COG0292		Ribosomal protein L20 (RplT) (PDB:1VS6) (PUBMED:30270044)	3	3	1	24	42	24	55		350	350	350										male_bins_95_identity___28217	male_bins_95_identity___19607				male_bins_95_identity___34777
group_1	COG1882	Pyruvate-formate lyase (PflD) (PDB:1CM5)	2	2	1	1010	118	1010	52		245	245	245					male_bins_95_identity___29884	male_bins_95_identity___20554
COG2801		Transposase InsO and inactivated derivatives (Tra5)	2	2	1	1009	678	1009	170		122	488	305	male_bins_95_identity___8251													male_bins_95_identity___10500
COG1866		Phosphoenolpyruvate carboxykinase	2	2	1	1008	9055	1008	6218		1718	1718	1718					male_bins_95_identity___1484	male_bins_95_identity___16298
group_101	COG1725	DNA-binding transcriptional regulator YhcF	2	2	1	1009	636	1009	140		89	371	230	male_bins_95_identity___8281					male_bins_95_identity___33558
group_10153	COG0459	Chaperonin GroEL (HSP60 family) (GroEL) (PDB:1AON)	2	2	1	1008	9355	1008	5946		1625	1625	1625					male_bins_95_identity___1566	male_bins_95_identity___37351
group_102			2	2	1	1008	1053	1008	5811		611	611	611	male_bins_95_identity___9355				male_bins_95_identity___1658
COG1595		DNA-directed RNA polymerase specialized sigma subunit	2	2	1	1008	1044	1008	5802		557	557	557	male_bins_95_identity___9356				male_bins_95_identity___1659
COG1551		sRNA-binding carbon storage regulator CsrA (CsrA) (PDB:1T3O)	2	2	1	1008	2750	1008	4229		230	230	230					male_bins_95_identity___2796	male_bins_95_identity___12825
group_105	COG0185	Ribosomal protein S19 (RpsS) (PDB:4V4H)	2	2	1	1008	49	1008	9664		281	281	281	male_bins_95_identity___9365								male_bins_95_identity___8999
group_106	COG0048	Ribosomal protein S12 (RpsL) (PDB:4V4H)	2	2	1	1008	121	1008	9429		419	422	420	male_bins_95_identity___9525								male_bins_95_identity___3009
group_107	COG0745	DNA-binding response regulator	2	2	1	1008	95	1008	9420		284	641	462	male_bins_95_identity___9534		male_bins_95_identity___27961
COG0524		Sugar or nucleoside kinase	2	2	1	1758	22	1758	37		1034	1034	1034					male_bins_95_identity___6789	male_bins_95_identity___38458
COG0056		FoF1-type ATP synthase	2	2	1	1008	4582	1008	3904		1505	1505	1505					male_bins_95_identity___7548	male_bins_95_identity___15085
COG0055		FoF1-type ATP synthase	2	2	1	1008	4609	1008	3906		1391	1391	1391					male_bins_95_identity___7550	male_bins_95_identity___15083
COG0205		6-phosphofructokinase (PfkA) (PDB:1KZH)	2	2	1	1008	3636	1008	3932		1073	1073	1073					male_bins_95_identity___7576	male_bins_95_identity___38408
COG1136		ABC-type lipoprotein export system	2	2	1	1008	6523	1008	293		761	761	761	male_bins_95_identity___20121						male_bins_95_identity___35672
group_11329	COG0197	Ribosomal protein L16/L10AE (RplP) (PDB:1WKI)	2	2	1	1008	10399	1008	9816		437	437	437					male_bins_95_identity___8687	male_bins_95_identity___10172
group_11332	COG0096	Ribosomal protein S8 (RpsH) (PDB:4V4H)	2	2	1	1008	10357	1008	9839		401	401	401					male_bins_95_identity___8694	male_bins_95_identity___10179
COG0098		Ribosomal protein S5 (RpsE) (PDB:4V4H)	2	2	1	1008	10354	1008	9842		509	509	509					male_bins_95_identity___8697	male_bins_95_identity___10182
COG1841		Ribosomal protein L30/L7E (RpmD) (PDB:1VS6)	2	2	1	1008	10353	1008	9843		182	182	182					male_bins_95_identity___8698	male_bins_95_identity___10183
COG0200		Ribosomal protein L15 (RplO) (PDB:1VS6)	2	2	1	1008	10352	1008	9844		446	446	446					male_bins_95_identity___8699	male_bins_95_identity___10184
group_11339	COG0257	Ribosomal protein L36 (RpmJ) (PDB:1DFE) (PUBMED:21627333)	2	2	1	1008	10341	1008	9851		113	113	113					male_bins_95_identity___8705	male_bins_95_identity___10190
group_11341	COG0100	Ribosomal protein S11 (RpsK) (PDB:4V4H)	2	2	1	1008	10339	1008	9854		395	395	395					male_bins_95_identity___8707	male_bins_95_identity___10192
COG0202		DNA-directed RNA polymerase	2	2	1	1008	10336	1008	9863		965	965	965					male_bins_95_identity___8709	male_bins_95_identity___10194
group_114	COG1131	ABC-type multidrug transport system	2	2	1	1008	6534	1008	772		644	644	644	male_bins_95_identity___20132													male_bins_95_identity___29144
group_115	COG3290	Sensor histidine kinase DipB regulating citrate/malate metabolism (CitA)	2	2	1	1008	6229	1008	653		1295	1295	1295	male_bins_95_identity___20137				male_bins_95_identity___7867
group_11525	COG1077	Cell shape-determining ATPase MreB	2	2	1	1008	9984	1008	10350		992	992	992					male_bins_95_identity___9926	male_bins_95_identity___656
group_116			2	2	1	1008	6223	1008	647		434	434	434	male_bins_95_identity___20143		male_bins_95_identity___2520
COG2207		AraC-type DNA-binding domain and AraC-containing proteins (AraC) (PDB:1BL0)	2	2	1	1010	423	1010	275		122	851	486	male_bins_95_identity___21700						male_bins_95_identity___36438
group_11707	COG1536	Flagellar motor switch protein FliG (FliG) (PDB:4FHR)	2	2	1	1008	9612	1008	10443		1007	1010	1008					male_bins_95_identity___11213	male_bins_95_identity___22323
group_118	COG3279	DNA-binding response regulator	2	2	1	1336	31	1336	61		440	440	440	male_bins_95_identity___24105						male_bins_95_identity___40208
group_11816	COG0057	Glyceraldehyde-3-phosphate dehydrogenase/erythrose-4-phosphate dehydrogenase (GapA) (PDB:3ZDF)	2	2	1	1008	5136	1008	1803		1016	1016	1016					male_bins_95_identity___11336	male_bins_95_identity___12881
group_119			2	2	1	1336	55	1336	85		470	470	470	male_bins_95_identity___24106						male_bins_95_identity___40207
group_12091	COG1250	3-hydroxyacyl-CoA dehydrogenase (FadB) (PDB:5ZQZ)	2	2	1	1008	2260	1008	4964		842	842	842					male_bins_95_identity___13738	male_bins_95_identity___40468
COG1960		Acyl-CoA dehydrogenase related to the alkylation response protein AidB (CaiA) (PDB:1BUC)	2	2	1	1008	2261	1008	4965		1166	1166	1166					male_bins_95_identity___13739	male_bins_95_identity___40467
group_121			2	2	1	1419	12	1419	13		740	878	809		male_bins_95_identity___170									male_bins_95_identity___20787
COG4974		Site-specific recombinase XerD (XerD) (PDB:1A0P)	2	2	1	1419	11	1419	12		599	755	677		male_bins_95_identity___171									male_bins_95_identity___20788
COG0254		Ribosomal protein L31 (RpmE) (PDB:1VS6)	2	2	1	1008	2055	1008	5539		206	206	206					male_bins_95_identity___16091	male_bins_95_identity___11399
COG0333		Ribosomal protein L32 (RpmF) (PDB:1VS6) (PUBMED:17114934)	2	2	1	1008	1202	1008	5556		179	179	179					male_bins_95_identity___16103	male_bins_95_identity___13927
COG0440		Acetolactate synthase	2	2	1	1008	1292	1008	5634		482	482	482					male_bins_95_identity___16127	male_bins_95_identity___40421
COG0059		Ketol-acid reductoisomerase (IlvC) (PDB:1NP3)	2	2	1	1008	1303	1008	5636		1025	1025	1025					male_bins_95_identity___16129	male_bins_95_identity___40419
group_12395	COG0822	Fe-S cluster assembly scaffold protein IscU	2	2	1	1008	1433	1008	5759		704	704	704					male_bins_95_identity___16223	male_bins_95_identity___25198
COG0291		Ribosomal protein L35 (RpmI) (PDB:1VS6) (PUBMED:28373563)	2	2	1	1008	9108	1008	1899		197	197	197					male_bins_95_identity___18395	male_bins_95_identity___27283
group_13232	COG0048	Ribosomal protein S12 (RpsL) (PDB:4V4H)	2	2	1	1008	4894	1008	2535		419	419	419					male_bins_95_identity___24435	male_bins_95_identity___38445
COG1837		Predicted RNA-binding protein YlqC	2	2	1	1008	1262	1008	5584		230	230	230					male_bins_95_identity___27222	male_bins_95_identity___13914
group_13588	COG3839	ABC-type sugar transport system	2	2	1	1008	3106	1008	4600		1112	1112	1112					male_bins_95_identity___27254	male_bins_95_identity___23670
group_13673	COG0238	Ribosomal protein S18 (RpsR) (PDB:4V4H)	2	2	1	1010	108	1010	33		263	263	263					male_bins_95_identity___29874	male_bins_95_identity___20568
group_13682	COG1882	Pyruvate-formate lyase (PflD) (PDB:1CM5)	2	2	1	1010	917	1010	136		2039	2039	2039					male_bins_95_identity___29886	male_bins_95_identity___20552
group_137			2	2	1	1008	6104	1008	528		383	953	668			male_bins_95_identity___2473			male_bins_95_identity___11470
group_138			2	2	1	1060	3	1061	8		194	323	258			male_bins_95_identity___4495		male_bins_95_identity___14917
group_140	COG4974	Site-specific recombinase XerD (XerD) (PDB:1A0P)	2	2	1	1060	4	1061	9		353	1082	717			male_bins_95_identity___4496		male_bins_95_identity___14916
group_142			2	2	1	1014	63	1014	9		257	314	285			male_bins_95_identity___6460		male_bins_95_identity___34513
group_143	COG3318	Uncharacterized conserved protein YecA	2	2	1	1019	61	1019	75		506	2558	1532			male_bins_95_identity___6470											male_bins_95_identity___21511
group_145			2	2	1	1008	3210	1008	4763		329	329	329			male_bins_95_identity___8541		male_bins_95_identity___23428
COG4115		Toxin component of the Txe-Axe toxin-antitoxin module	2	2	1	1013	73	1013	67		269	269	269			male_bins_95_identity___13565			male_bins_95_identity___39391
group_148			2	2	1	1010	213	1010	376		122	176	149			male_bins_95_identity___18186											male_bins_95_identity___5155
COG0137		Argininosuccinate synthase (ArgG) (PDB:1J1Z)	2	2	1	1008	10091	1008	9731		1214	1217	1215					male_bins_95_identity___8816	male_bins_95_identity___10122
group_149	COG2207	AraC-type DNA-binding domain and AraC-containing proteins (AraC) (PDB:1BL0)	2	2	1	1823	58	1823	70		902	902	902			male_bins_95_identity___21799											male_bins_95_identity___31916
COG2963		Transposase InsE and inactivated derivatives (InsE) (PDB:2JN6) (PUBMED:23818957)	2	2	1	1114	9	1110	3		122	338	230			male_bins_95_identity___21820	male_bins_95_identity___3590
group_151	COG4496	Predicted DNA-binding transcriptional regulator YerC	2	2	1	1008	7648	1008	7568		89	302	195			male_bins_95_identity___26930						male_bins_95_identity___12963
COG2161		Antitoxin component YafN of the YafNO toxin-antitoxin module	2	2	1	1011	27	1011	174		260	314	287			male_bins_95_identity___29772	male_bins_95_identity___9820
group_155	COG1961	Site-specific DNA recombinase SpoIVCA/DNA invertase PinE (SpoIVCA) (PDB:1GDT)	2	2	1	1010	797	1010	852		335	1844	1089			male_bins_95_identity___31466		male_bins_95_identity___12721
COG3290		Sensor histidine kinase DipB regulating citrate/malate metabolism (CitA)	2	2	1	1009	306	1009	951		350	1292	821			male_bins_95_identity___32252				male_bins_95_identity___12519
group_157			2	2	1	1034	9	1033	30		425	1010	717			male_bins_95_identity___33472						male_bins_95_identity___14042
group_158	COG0745	DNA-binding response regulator	2	2	1	1126	4	1122	4		701	701	701			male_bins_95_identity___38246	male_bins_95_identity___12285
COG1131		ABC-type multidrug transport system	2	2	1	1126	2	1122	3		320	782	551			male_bins_95_identity___38247	male_bins_95_identity___12284
group_160			2	2	1	1066	14	1066	7		116	1253	684			male_bins_95_identity___38251	male_bins_95_identity___14647
group_161	COG1136	ABC-type lipoprotein export system	2	2	1	1755	46	1755	185		608	686	647			male_bins_95_identity___39203		male_bins_95_identity___398
group_164			2	2	1	1008	1030	1008	5787		1241	1241	1241				male_bins_95_identity___2591	male_bins_95_identity___1673
group_165			2	2	1	1008	1031	1008	5789		2009	2009	2009				male_bins_95_identity___2592	male_bins_95_identity___1672
group_168			2	2	1	1022	14	1022	8		200	236	218				male_bins_95_identity___10931					male_bins_95_identity___37586
group_169			2	2	1	1022	37	1022	31		209	260	234				male_bins_95_identity___10936					male_bins_95_identity___37582
group_172	COG2207	AraC-type DNA-binding domain and AraC-containing proteins (AraC) (PDB:1BL0)	2	2	1	1008	4328	1008	3761		770	770	770				male_bins_95_identity___13646			male_bins_95_identity___4767
COG3177		Fic family protein (PDB:3CUC)	2	2	1	1008	4960	1008	2503		353	893	623				male_bins_95_identity___17049			male_bins_95_identity___31577
COG1453		Predicted oxidoreductase of the aldo/keto reductase family	2	2	1	1020	7	1020	26		707	1007	857				male_bins_95_identity___19243					male_bins_95_identity___13012
group_175			2	2	1	1009	315	1009	970		803	1133	968				male_bins_95_identity___20310			male_bins_95_identity___12510
group_178	COG1961	Site-specific DNA recombinase SpoIVCA/DNA invertase PinE (SpoIVCA) (PDB:1GDT)	2	2	1	1816	40	1816	36		1391	1661	1526				male_bins_95_identity___24264	male_bins_95_identity___16267
COG3505		Type IV secretory pathway	2	2	1	1816	80	1816	80		239	263	251				male_bins_95_identity___24268	male_bins_95_identity___16259
COG1051		ADP-ribose pyrophosphatase YjhB	2	2	1	1008	1316	1008	5644		446	455	450					male_bins_95_identity___16137	male_bins_95_identity___40410
group_18192	COG0238	Ribosomal protein S18 (RpsR) (PDB:4V4H)	2	2	1	1008	4136	1008	3647		263	263	263							male_bins_95_identity___4639							male_bins_95_identity___26553
COG5845		Stage V sporulation protein SpoVT	2	2	1	1008	4411	1008	3848		545	545	545							male_bins_95_identity___4698							male_bins_95_identity___26484
group_184			2	2	1	1816	89	1816	89		884	950	917				male_bins_95_identity___24277	male_bins_95_identity___5648
group_18476			2	2	1	1008	8828	1008	834		1010	1010	1010							male_bins_95_identity___5561							male_bins_95_identity___29154
group_19280	COG0745	DNA-binding response regulator	2	2	1	1009	911	1009	1060		392	392	392							male_bins_95_identity___12474							male_bins_95_identity___31945
group_19341	COG0057	Glyceraldehyde-3-phosphate dehydrogenase/erythrose-4-phosphate dehydrogenase (GapA) (PDB:3ZDF)	2	2	1	1010	342	1010	533		1001	1001	1001							male_bins_95_identity___13670							male_bins_95_identity___6064
group_19360			2	2	1	1010	246	1010	448		260	260	260							male_bins_95_identity___13691							male_bins_95_identity___5124
COG3598		RecA-family ATPase (RepA)	2	2	1	1816	131	1816	131		620	977	798				male_bins_95_identity___24318	male_bins_95_identity___22268
COG2337		mRNA-degrading endonuclease MazF	2	2	1	1008	8548	1008	7362		341	341	341							male_bins_95_identity___14824							male_bins_95_identity___37875
group_196			2	2	1	1009	1273	1009	365		152	806	479				male_bins_95_identity___25900										male_bins_95_identity___15499
group_197			2	2	1	1010	621	1010	694		200	407	303				male_bins_95_identity___28629	male_bins_95_identity___12574
group_198	COG3505	Type IV secretory pathway	2	2	1	1010	627	1010	720		1340	1796	1568				male_bins_95_identity___28633	male_bins_95_identity___12577
group_19911	COG1960	Acyl-CoA dehydrogenase related to the alkylation response protein AidB (CaiA) (PDB:1BUC)	2	2	1	1008	5588	1008	1257		1166	1166	1166							male_bins_95_identity___18272							male_bins_95_identity___18932
group_2	COG1882	Pyruvate-formate lyase (PflD) (PDB:1CM5)	2	2	1	1008	9353	1008	5943		239	239	239					male_bins_95_identity___1564	male_bins_95_identity___37349
COG2204		DNA-binding transcriptional response regulator	2	2	1	1008	6653	1008	6673		362	362	362							male_bins_95_identity___32386							male_bins_95_identity___19834
COG0166		Glucose-6-phosphate isomerase (Pgi) (PDB:1B0Z)	2	2	1	1755	142	1755	85		1346	1346	1346					male_bins_95_identity___498	male_bins_95_identity___2881
COG1932		Phosphoserine aminotransferase (SerC) (PDB:1BJN)	2	2	1	1008	5894	1008	1878		1082	1082	1082					male_bins_95_identity___1471	male_bins_95_identity___27305
group_215	COG0129	Dihydroxyacid dehydratase/phosphogluconate dehydratase (IlvD) (PDB:2GP4)	2	2	1	1008	9066	1008	1880		1670	1670	1670					male_bins_95_identity___1473	male_bins_95_identity___27302
COG1148		Heterodisulfide reductase	2	2	1	1008	8988	1008	8436		1496	1496	1496					male_bins_95_identity___1526	male_bins_95_identity___16314
COG0234		Co-chaperonin GroES (HSP10) (GroES)	2	2	1	1008	9356	1008	5949		284	284	284					male_bins_95_identity___1567	male_bins_95_identity___37352
COG0488		ATPase components of ABC transporters with duplicated ATPase domains (Uup) (PDB:5ZXD)	2	2	1	1008	9361	1008	5952		1646	1646	1646					male_bins_95_identity___1570	male_bins_95_identity___37355
COG0523		Zinc metallochaperone YeiR/ZagA and related GTPases	2	2	1	1008	9376	1008	5980		1043	1133	1088					male_bins_95_identity___1585	male_bins_95_identity___37369
group_221	COG0568	DNA-directed RNA polymerase	2	2	1	1008	9383	1008	5987		1115	1115	1115					male_bins_95_identity___1592	male_bins_95_identity___37376
COG2268		Uncharacterized membrane protein YqiK	2	2	1	1008	9421	1008	5885		1532	1538	1535					male_bins_95_identity___1611	male_bins_95_identity___37408
COG2242		Precorrin-6B methylase 2 (CobL) (PDB:1F38)	2	2	1	1008	9433	1008	5850		908	908	908					male_bins_95_identity___1623	male_bins_95_identity___19392
COG0691		tmRNA-binding protein (SmpB) (PDB:1J1H) (PUBMED:26251518)	2	2	1	1008	9434	1008	5849		470	470	470					male_bins_95_identity___1624	male_bins_95_identity___19393
COG0443		Molecular chaperone DnaK (HSP70) (DnaK) (PDB:3I33)	2	2	1	1008	4659	1008	5222		1874	1874	1874					male_bins_95_identity___2642	male_bins_95_identity___15032
COG0595		mRNA degradation ribonuclease J1/J2 (RnjA) (PDB:3T3N)	2	2	1	1008	4670	1008	5277		1670	1673	1671					male_bins_95_identity___2656	male_bins_95_identity___15021
COG1063		Threonine dehydrogenase or related Zn-dependent dehydrogenase (Tdh) (PDB:4A2C)	2	2	1	1008	2156	1008	5266		1262	1262	1262					male_bins_95_identity___2667	male_bins_95_identity___8918
COG3968		Glutamine synthetase type III (GlnA3)	2	2	1	1008	4721	1008	5328		2111	2111	2111					male_bins_95_identity___2671	male_bins_95_identity___14970
COG1175		ABC-type sugar transport system	2	2	1	1008	3445	1008	3998		962	962	962					male_bins_95_identity___2724	male_bins_95_identity___38433
group_230	COG0191	Fructose/tagatose bisphosphate aldolase (Fba) (PDB:1B57)	2	2	1	1008	3378	1008	4034		863	863	863					male_bins_95_identity___2735	male_bins_95_identity___38441
COG1472		Periplasmic beta-glucosidase and related glycosidases (BglX) (PDB:2X40)	2	2	1	1008	2203	1008	4912		1772	1772	1772					male_bins_95_identity___2767	male_bins_95_identity___40455
COG1312		D-mannonate dehydratase (UxuA) (PDB:1TZ9)	2	2	1	1008	2199	1008	4908		1070	1070	1070					male_bins_95_identity___2768	male_bins_95_identity___40454
group_233	COG1028	NAD(P)-dependent dehydrogenase	2	2	1	1008	2198	1008	4907		845	845	845					male_bins_95_identity___2769	male_bins_95_identity___40453
group_234	COG0267	Ribosomal protein L33 (RpmG) (PDB:1VS6)	2	2	1	1008	3333	1008	4812		149	149	149					male_bins_95_identity___2817	male_bins_95_identity___26115
COG0081		Ribosomal protein L1 (RplA) (PDB:3J65)	2	2	1	1008	3337	1008	4819		689	689	689					male_bins_95_identity___2821	male_bins_95_identity___26119
group_236	COG0085	DNA-directed RNA polymerase	2	2	1	1008	3342	1008	4036		3860	3863	3861					male_bins_95_identity___2825	male_bins_95_identity___38443
group_237	COG0086	DNA-directed RNA polymerase	2	2	1	1008	3341	1008	2786		3662	3719	3690					male_bins_95_identity___2826	male_bins_95_identity___38444
group_238	COG5016	Pyruvate/oxaloacetate carboxyltransferase (OadA1) (PDB:2NX9) (PUBMED:18681940)	2	2	1	1008	8038	1008	8341		1436	1436	1436					male_bins_95_identity___3591	male_bins_95_identity___18500
COG1352		Methylase of chemotaxis methyl-accepting proteins (CheR) (PDB:1AF7)	2	2	1	1008	8025	1008	8352		779	779	779					male_bins_95_identity___3598	male_bins_95_identity___18493
COG4657		Na+-translocating ferredoxin:NAD+ oxidoreductase RNF	2	2	1	1008	8019	1008	8361		587	587	587					male_bins_95_identity___3604	male_bins_95_identity___18487
COG5824		Stage III sporulation protein SpoIIIAC	2	2	1	1008	7981	1008	8378		194	206	200					male_bins_95_identity___3614	male_bins_95_identity___16372
COG4108		Peptide chain release factor RF-3 (PrfC) (PDB:3UOQ)	2	2	1	1008	7973	1008	8385		1595	1595	1595					male_bins_95_identity___3620	male_bins_95_identity___16365
group_243	COG0714	MoxR-like ATPase (MoxR) (PDB:2R44)	2	2	1	1008	7220	1008	2268		815	815	815					male_bins_95_identity___3751	male_bins_95_identity___13863
group_244	COG3825	Uncharacterized CoxE-like protein	2	2	1	1008	7221	1008	8175		1202	1202	1202					male_bins_95_identity___3752	male_bins_95_identity___13862
COG0268		Ribosomal protein S20 (RpsT) (PDB:4V4H)	2	2	1	1763	48	1763	28		263	263	263					male_bins_95_identity___4816	male_bins_95_identity___39496
COG3279		DNA-binding response regulator	2	2	1	1008	6366	1008	654		704	704	704	male_bins_95_identity___20136				male_bins_95_identity___7866
COG1522		DNA-binding transcriptional regulator	2	2	1	1760	33	1760	33		482	482	482					male_bins_95_identity___5642	male_bins_95_identity___4877
group_25244	COG0361	Translation initiation factor IF-1 (InfA) (PDB:5FIM)	2	2	1	2	145	2	192		218	218	218										male_bins_95_identity___4060	male_bins_95_identity___36839
COG1209		dTDP-glucose pyrophosphorylase (RmlA1) (PDB:1FXO)	2	2	1	1008	922	1008	8743		869	869	869					male_bins_95_identity___6654	male_bins_95_identity___3875
COG1109		Phosphomannomutase (ManB) (PDB:6MNV)	2	2	1	1008	877	1008	8734		1727	1727	1727					male_bins_95_identity___6663	male_bins_95_identity___3884
COG1028		NAD(P)-dependent dehydrogenase	2	2	1	1758	23	1758	38		803	803	803					male_bins_95_identity___6790	male_bins_95_identity___38459
COG0191		Fructose/tagatose bisphosphate aldolase (Fba) (PDB:1B57)	2	2	1	8	73	8	119		995	995	995										male_bins_95_identity___16462	male_bins_95_identity___3079
COG0800		2-keto-3-deoxy-6-phosphogluconate aldolase (Eda) (PDB:2V81)	2	2	1	1758	58	1758	73		962	962	962					male_bins_95_identity___6791	male_bins_95_identity___38460
COG0356		FoF1-type ATP synthase	2	2	1	1008	4271	1008	3269		716	716	716					male_bins_95_identity___7544	male_bins_95_identity___15089
COG2310		Stress response protein SCP2 (TerZ) (PDB:2QNG)	2	2	1	1008	3418	1008	3973		581	581	581					male_bins_95_identity___7604	male_bins_95_identity___38414
group_264	COG0334	Glutamate dehydrogenase/leucine dehydrogenase (GdhA) (PDB:1B3B) (PUBMED:24391520)	2	2	1	1008	2737	1008	4163		1334	1355	1344					male_bins_95_identity___7707	male_bins_95_identity___12838
group_265	COG1087	UDP-glucose 4-epimerase (GalE) (PDB:1A9Y)	2	2	1	1008	2696	1008	2941		1016	1016	1016					male_bins_95_identity___7748	male_bins_95_identity___38353
group_266	COG0448	Glucose-1-phosphate adenylyltransferase (ADP-glucose pyrophosphorylase) (GlgC) (PDB:5MNI) (PUBMED:27545622)	2	2	1	1008	3597	1008	2952		1118	1118	1118					male_bins_95_identity___7754	male_bins_95_identity___38359
group_267	COG2088	DNA-binding protein SpoVG	2	2	1	1008	3598	1008	2953		281	281	281					male_bins_95_identity___7755	male_bins_95_identity___38360
group_268	COG5845	Stage V sporulation protein SpoVT	2	2	1	1008	3673	1008	2966		548	548	548					male_bins_95_identity___7768	male_bins_95_identity___38371
COG0448		Glucose-1-phosphate adenylyltransferase (ADP-glucose pyrophosphorylase) (GlgC) (PDB:5MNI) (PUBMED:27545622)	2	2	1	1008	4648	1008	5204		1205	1205	1205					male_bins_95_identity___7800	male_bins_95_identity___15044
COG5830		Stage III sporulation protein SpoIIID	2	2	1	1008	4656	1008	5219		254	257	255					male_bins_95_identity___7808	male_bins_95_identity___15035
COG1653		ABC-type glycerol-3-phosphate transport system	2	2	1	1008	2463	1008	5162		977	1619	1298					male_bins_95_identity___7820	male_bins_95_identity___26159
group_272	COG1028	NAD(P)-dependent dehydrogenase	2	2	1	1008	6311	1008	373		800	800	800					male_bins_95_identity___7834	male_bins_95_identity___30131
COG2188		DNA-binding transcriptional regulator	2	2	1	1008	6354	1008	428		368	368	368					male_bins_95_identity___7854									male_bins_95_identity___30465
COG0087		Ribosomal protein L3 (RplC) (PDB:1VS6)	2	2	1	1008	10406	1008	9808		683	683	683					male_bins_95_identity___8680	male_bins_95_identity___10165
COG0088		Ribosomal protein L4 (RplD) (PDB:1VS6)	2	2	1	1008	10405	1008	9809		620	620	620					male_bins_95_identity___8681	male_bins_95_identity___10166
COG0090		Ribosomal protein L2 (RplB) (PDB:1VS6)	2	2	1	1008	10403	1008	9812		842	842	842					male_bins_95_identity___8683	male_bins_95_identity___10168
COG0185		Ribosomal protein S19 (RpsS) (PDB:4V4H)	2	2	1	1008	10402	1008	9813		281	281	281					male_bins_95_identity___8684	male_bins_95_identity___10169
COG0091		Ribosomal protein L22 (RplV) (PDB:1VS6)	2	2	1	1008	10401	1008	9814		392	392	392					male_bins_95_identity___8685	male_bins_95_identity___10170
COG0092		Ribosomal protein S3 (RpsC) (PDB:1VS6)	2	2	1	1008	10400	1008	9815		656	656	656					male_bins_95_identity___8686	male_bins_95_identity___10171
COG0186		Ribosomal protein S17 (RpsQ) (PDB:4V4H)	2	2	1	1008	10397	1008	9819		260	260	260					male_bins_95_identity___8689	male_bins_95_identity___10174
COG0094		Ribosomal protein L5 (RplE) (PDB:1VS6)	2	2	1	1008	10375	1008	9837		539	539	539					male_bins_95_identity___8692	male_bins_95_identity___10177
COG0097		Ribosomal protein L6P/L9E (RplF) (PDB:1VS6)	2	2	1	1008	10356	1008	9840		542	542	542					male_bins_95_identity___8695	male_bins_95_identity___10180
COG0256		Ribosomal protein L18 (RplR) (PDB:1VS6)	2	2	1	1008	10355	1008	9841		368	368	368					male_bins_95_identity___8696	male_bins_95_identity___10181
COG0563		Adenylate kinase or related kinase (Adk) (PDB:1AK2)	2	2	1	1008	10350	1008	9847		641	641	641					male_bins_95_identity___8701	male_bins_95_identity___10186
COG1544		Ribosome-associated translation inhibitor RaiA (RaiA) (PDB:1IMU)	2	2	1	1008	10304	1008	9892		533	533	533					male_bins_95_identity___8734	male_bins_95_identity___33638
COG0548		N-acetylglutamate kinase (ArgB) (PDB:3S6G)	2	2	1	1008	10101	1008	9753		902	905	903					male_bins_95_identity___8823	male_bins_95_identity___10127
COG1725		DNA-binding transcriptional regulator YhcF	2	2	1	1008	10192	1008	9192		371	398	384					male_bins_95_identity___8882	male_bins_95_identity___22409
group_290	COG1278	Cold shock protein	2	2	1	1756	112	1756	53		212	212	212					male_bins_95_identity___10046	male_bins_95_identity___2827
COG5811		Sporulation sigma factor SigE (mother cell-specific	2	2	1	1756	91	1756	100		728	728	728					male_bins_95_identity___10070	male_bins_95_identity___2852
group_292	COG5813	Sporulation sigma factor SigG (forespore-specific	2	2	1	1756	90	1756	101		782	782	782					male_bins_95_identity___10071	male_bins_95_identity___2853
COG4465		GTP-sensing pleiotropic transcriptional regulator CodY (CodY) (PDB:2B0L)	2	2	1	1008	9636	1008	10438		785	785	785					male_bins_95_identity___11208	male_bins_95_identity___22328
COG1868		Flagellar motor switch protein FliM (FliM) (PDB:2HP7)	2	2	1	1008	9597	1008	10459		980	980	980					male_bins_95_identity___11228	male_bins_95_identity___30004
COG4753		Two-component response regulator	2	2	1	1008	9595	1008	10461		362	362	362					male_bins_95_identity___11230	male_bins_95_identity___30006
COG1298		Flagellar biosynthesis protein FlhA (FlhA) (PDB:6AI0)	2	2	1	1008	9584	1008	10467		2039	2039	2039					male_bins_95_identity___11236	male_bins_95_identity___30012
COG1776		Phosphoaspartate phosphatase CheC	2	2	1	1008	9571	1008	8921		608	620	614					male_bins_95_identity___11243	male_bins_95_identity___30019
group_300	COG0052	Ribosomal protein S2 (RpsB) (PDB:4V4H)	2	2	1	1008	9563	1008	8913		737	740	738					male_bins_95_identity___11251	male_bins_95_identity___30027
group_301	COG1175	ABC-type sugar transport system	2	2	1	1008	9553	1008	8831		896	902	899					male_bins_95_identity___11261	male_bins_95_identity___3819
group_302	COG0395	ABC-type glycerol-3-phosphate transport system	2	2	1	1008	9520	1008	8798		905	905	905					male_bins_95_identity___11262	male_bins_95_identity___3820
group_303	COG0574	Phosphoenolpyruvate synthase/pyruvate phosphate dikinase (PpsA) (PDB:5HV6)	2	2	1	1008	9514	1008	8550		2636	2636	2636					male_bins_95_identity___11268	male_bins_95_identity___4885
group_304	COG0231	Translation elongation factor P (EF-P)/translation initiation factor 5A (eIF-5A) (Efp) (PDB:1UEB)	2	2	1	1008	9489	1008	8548		557	557	557					male_bins_95_identity___11292	male_bins_95_identity___4887
COG0696		Phosphoglycerate mutase (BPG-independent)	2	2	1	1008	9474	1008	8533		1541	1541	1541					male_bins_95_identity___11307	male_bins_95_identity___19398
group_308	COG0149	Triosephosphate isomerase (TpiA) (PDB:1HG3)	2	2	1	1008	5134	1008	1800		749	830	789					male_bins_95_identity___11334	male_bins_95_identity___12878
COG0126		3-phosphoglycerate kinase (Pgk) (PDB:13PK)	2	2	1	1008	5135	1008	1802		1223	1223	1223					male_bins_95_identity___11335	male_bins_95_identity___12880
group_310	COG4974	Site-specific recombinase XerD (XerD) (PDB:1A0P)	2	2	1	1008	5146	1008	1813		884	884	884					male_bins_95_identity___11341	male_bins_95_identity___12890
group_311	COG1094	rRNA processing protein Krr1/Pno1	2	2	1	1008	5149	1008	1816		1541	1544	1542					male_bins_95_identity___11344	male_bins_95_identity___12893
COG2052		Regulator of extracellular matrix RemA	2	2	1	1008	5155	1008	1822		269	275	272					male_bins_95_identity___11350	male_bins_95_identity___12907
COG0395		ABC-type glycerol-3-phosphate transport system	2	2	1	1008	5174	1008	1841		881	881	881					male_bins_95_identity___11363	male_bins_95_identity___37452
COG1129		ABC-type sugar transport system	2	2	1	1010	703	1010	796		1544	1544	1544					male_bins_95_identity___12653	male_bins_95_identity___35770
COG1309		DNA-binding protein	2	2	1	9	2	10	2		581	581	581													male_bins_95_identity___22789			male_bins_95_identity___26681
COG0491		Glyoxylase or a related metal-dependent hydrolase	2	2	1	9	3	10	3		725	725	725													male_bins_95_identity___22790			male_bins_95_identity___26682
group_31431			2	2	1	9	5	10	5		158	158	158													male_bins_95_identity___22792			male_bins_95_identity___26684
group_31432			2	2	1	9	13	10	13		173	173	173													male_bins_95_identity___22793			male_bins_95_identity___26685
COG4211		ABC-type glucose/galactose transport system	2	2	1	1010	740	1010	797		1016	1016	1016					male_bins_95_identity___12654	male_bins_95_identity___35769
group_316	COG0205	6-phosphofructokinase (PfkA) (PDB:1KZH)	2	2	1	1010	833	1010	890		974	974	974					male_bins_95_identity___12696	male_bins_95_identity___20468
group_317	COG0782	Transcription elongation factor	2	2	1	1010	822	1010	868		488	488	488					male_bins_95_identity___12707	male_bins_95_identity___20456
COG0516		IMP dehydrogenase/GMP reductase (GuaB) (PDB:1B3O)	2	2	1	1008	9658	1008	10393		1454	1454	1454					male_bins_95_identity___12741	male_bins_95_identity___22350
COG0183		Acetyl-CoA acetyltransferase (PaaJ) (PDB:1AFW)	2	2	1	1008	2258	1008	4962		1184	1184	1184					male_bins_95_identity___13736	male_bins_95_identity___40470
COG1024		Enoyl-CoA hydratase/carnithine racemase (CaiD) (PDB:1DCI)	2	2	1	1008	2259	1008	4963		785	785	785					male_bins_95_identity___13737	male_bins_95_identity___40469
group_321	COG2086	Electron transfer flavoprotein	2	2	1	1008	2262	1008	4966		782	782	782					male_bins_95_identity___13740	male_bins_95_identity___40466
COG0152		Phosphoribosylaminoimidazole-succinocarboxamide synthase (PurC) (PDB:1A48)	2	2	1	1009	745	1009	1236		704	707	705							male_bins_95_identity___12311							male_bins_95_identity___10452
COG2025		Electron transfer flavoprotein	2	2	1	1008	2263	1008	4967		1043	1043	1043					male_bins_95_identity___13741	male_bins_95_identity___40465
COG4877		Uncharacterized conserved protein	2	2	1	1008	2432	1008	5136		200	200	200					male_bins_95_identity___13748	male_bins_95_identity___26185
COG3835		Sugar diacid utilization regulator CdaR (CdaR)	2	2	1	1008	2387	1008	5079		1088	1088	1088					male_bins_95_identity___13767	male_bins_95_identity___32531
COG4496		Predicted DNA-binding transcriptional regulator YerC	2	2	1	1008	590	1008	8999		296	323	309					male_bins_95_identity___13813	male_bins_95_identity___22293
COG0629		Single-stranded DNA-binding protein (Ssb) (PDB:1EQQ)	2	2	1	1008	598	1008	9006		674	674	674					male_bins_95_identity___13821	male_bins_95_identity___22300
group_327	COG1217	Predicted membrane GTPase TypA/BipA involved in stress response (TypA) (PDB:5A9V)	2	2	1	1008	599	1008	9007		1832	1832	1832					male_bins_95_identity___13822	male_bins_95_identity___22301
COG3409		Peptidoglycan-binding (PGRP) domain of peptidoglycan hydrolases (PGRP) (PDB:4FET)	2	2	1	1008	607	1008	9013		482	1262	872					male_bins_95_identity___13823	male_bins_95_identity___22307
group_331	COG1396	Transcriptional regulator	2	2	1	1008	2901	1008	4457		449	560	504						male_bins_95_identity___23535								male_bins_95_identity___2121
COG4209		ABC-type polysaccharide transport system	2	2	1	1008	4768	1008	5375		83	938	510					male_bins_95_identity___16018	male_bins_95_identity___14923
COG2846		Iron-sulfur cluster repair protein YtfE	2	2	1	1008	4187	1008	3704		191	194	192							male_bins_95_identity___4650							male_bins_95_identity___26541
group_333	COG1186	Protein chain release factor PrfB (PrfB) (PDB:1GQE)	2	2	1	1008	5058	1008	5496		983	995	989					male_bins_95_identity___16077	male_bins_95_identity___37482
COG1171		Threonine deaminase (IlvA) (PDB:3IAU)	2	2	1	1008	1274	1008	5591		1220	1220	1220					male_bins_95_identity___16109	male_bins_95_identity___13921
COG1302		Uncharacterized conserved protein YloU	2	2	1	1008	1326	1008	5650		356	356	356					male_bins_95_identity___16143	male_bins_95_identity___40404
COG0280		Phosphotransacetylase (includes Pta	2	2	1	1008	1330	1008	5654		983	1097	1040					male_bins_95_identity___16148	male_bins_95_identity___40400
COG0187		DNA gyrase/topoisomerase IV	2	2	1	1008	1353	1008	5678		1928	1940	1934					male_bins_95_identity___16149	male_bins_95_identity___40399
group_338	COG0211	Ribosomal protein L27 (RpmA) (PDB:1VS6)	2	2	1	1008	1377	1008	5701		287	287	287					male_bins_95_identity___16173	male_bins_95_identity___40376
group_339			2	2	1	1008	1429	1008	5752		1016	1016	1016					male_bins_95_identity___16222	male_bins_95_identity___25197
COG0136		Aspartate-semialdehyde dehydrogenase (Asd) (PDB:1BRM)	2	2	1	1008	9249	1008	6032		1085	1085	1085					male_bins_95_identity___16227	male_bins_95_identity___25205
group_341	COG0480	Translation elongation factor EF-G	2	2	1	1008	9267	1008	6014		2090	2090	2090					male_bins_95_identity___16245	male_bins_95_identity___37403
group_34108			2	2	1	1009	1121	1009	681		158	161	159							male_bins_95_identity___11119							male_bins_95_identity___34733
group_342			2	2	1	1816	78	1816	72		212	212	212					male_bins_95_identity___16261									male_bins_95_identity___3162
COG1328		Anaerobic ribonucleoside-triphosphate reductase (NrdD) (PDB:4COI)	2	2	1	1759	60	1759	24		2165	2165	2165					male_bins_95_identity___17145	male_bins_95_identity___35821
COG3426		Butyrate kinase (Buk) (PDB:1SAZ)	2	2	1	1008	2221	1008	4925		1067	1067	1067					male_bins_95_identity___17157	male_bins_95_identity___40463
group_347	COG1077	Cell shape-determining ATPase MreB	2	2	1	1008	1764	1008	2125		1010	1010	1010					male_bins_95_identity___18297	male_bins_95_identity___40334
COG2894		Septum site-determining ATPase MinD (MinD) (PDB:4V02)	2	2	1	1008	1771	1008	2134		809	809	809					male_bins_95_identity___18302	male_bins_95_identity___40339
COG0851		Septum formation topological specificity factor MinE (MinE) (PDB:1EV0)	2	2	1	1008	1773	1008	2136		269	269	269					male_bins_95_identity___18303	male_bins_95_identity___40340
COG1803		Methylglyoxal synthase (MgsA) (PDB:1S8A) (PUBMED:9665712)	2	2	1	1008	1777	1008	2138		395	395	395					male_bins_95_identity___18305	male_bins_95_identity___40342
COG0493		NADPH-dependent glutamate synthase beta chain or related oxidoreductase (GltD) (PDB:1H7X)	2	2	1	1008	1791	1008	2067		1385	1385	1385					male_bins_95_identity___18319	male_bins_95_identity___40252
group_352	COG0330	Regulator of protease activity HflC	2	2	1	1008	9143	1008	1978		914	914	914					male_bins_95_identity___18364	male_bins_95_identity___16278
COG0178		Excinuclease UvrABC ATPase subunit (UvrA) (PDB:2R6F)	2	2	1	1008	9988	1008	10372		2864	2888	2876					male_bins_95_identity___20397	male_bins_95_identity___660
COG1219		ATP-dependent protease Clp	2	2	1	1008	9997	1008	10381		1268	1268	1268					male_bins_95_identity___20406	male_bins_95_identity___22362
group_359	COG0740	ATP-dependent protease ClpP	2	2	1	1008	9999	1008	10053		602	608	605					male_bins_95_identity___20407	male_bins_95_identity___22363
group_360	COG5852	Small acid-soluble spore protein SspA/SspB/SspC/SspD (alpha/beta-type) (SspA/SspB/SspC/SspD) (PUBMED:3009398	2	2	1	1008	10039	1008	10050		203	206	204					male_bins_95_identity___20409	male_bins_95_identity___22365
group_363	COG0423	Glycyl-tRNA synthetase	2	2	1	1008	7409	1008	8206		1391	1391	1391					male_bins_95_identity___22243	male_bins_95_identity___13831
COG1883		Na+-transporting oxaloacetate/methylmalonyl-CoA decarboxylase	2	2	1	1008	8039	1008	8336		1148	1148	1148					male_bins_95_identity___22262	male_bins_95_identity___18501
group_365	COG1396	Transcriptional regulator	2	2	1	1816	137	1816	137		314	548	431					male_bins_95_identity___22264		male_bins_95_identity___9849
COG1167		DNA-binding transcriptional regulator	2	2	1	1008	3300	1008	4779		1283	1283	1283					male_bins_95_identity___23412	male_bins_95_identity___26082
COG2715		Spore maturation protein SpmA (function unknown) (SpmA)	2	2	1	1008	3149	1008	4658		338	641	489					male_bins_95_identity___23484	male_bins_95_identity___7883
group_368	COG1925	HPr or related phosphotransfer protein (PtsH) (PDB:1CM2)	2	2	1	1008	3110	1008	4614		254	254	254					male_bins_95_identity___23523	male_bins_95_identity___23674
COG3958		Transketolase	2	2	1	1757	133	1757	32		959	959	959					male_bins_95_identity___24412	male_bins_95_identity___31666
COG3959		Transketolase	2	2	1	1757	135	1757	33		833	833	833					male_bins_95_identity___24413	male_bins_95_identity___31665
COG0235		5-methylthioribulose/5-deoxyribulose/Fuculose 1-phosphate aldolase (methionine salvage	2	2	1	1757	136	1757	51		695	695	695					male_bins_95_identity___24414	male_bins_95_identity___31663
COG0442		Prolyl-tRNA synthetase (ProS) (PDB:5XIF)	2	2	1	1757	139	1757	77		1439	1439	1439					male_bins_95_identity___24417	male_bins_95_identity___36672
COG0732		Restriction endonuclease S subunit (HsdS) (PDB:1YDX)	2	2	1	1008	4910	1008	2553		71	1226	648					male_bins_95_identity___24419									male_bins_95_identity___29213
group_378	COG0050	Translation elongation factor EF-Tu	2	2	1	1008	4897	1008	2540		1187	1187	1187					male_bins_95_identity___24432	male_bins_95_identity___38448
COG0480		Translation elongation factor EF-G	2	2	1	1008	4896	1008	2537		2117	2117	2117					male_bins_95_identity___24433	male_bins_95_identity___38447
COG0049		Ribosomal protein S7 (RpsG) (PDB:4V4H)	2	2	1	1008	4895	1008	2536		470	470	470					male_bins_95_identity___24434	male_bins_95_identity___38446
COG0465		ATP-dependent Zn proteases (HflB) (PDB:1LV7)	2	2	1	1008	2972	1008	4478		1802	1802	1802					male_bins_95_identity___26015	male_bins_95_identity___23556
group_382	COG1188	Ribosomal 50S subunit-recycling heat shock protein	2	2	1	1008	2979	1008	4485		239	239	239					male_bins_95_identity___26022	male_bins_95_identity___23563
COG0776		Bacterial nucleoid DNA-binding protein IHF-alpha (HimA) (PDB:1B8Z)	2	2	1	1008	2997	1008	4486		275	275	275					male_bins_95_identity___26023	male_bins_95_identity___23564
COG0372		Citrate synthase (GltA) (PDB:3TQG) (PUBMED:25211225)	2	2	1	1008	9183	1008	6172		1418	1421	1419					male_bins_95_identity___27059	male_bins_95_identity___30949
COG0195		Transcription antitermination factor NusA	2	2	1	1008	9185	1008	6174		1244	1283	1263					male_bins_95_identity___27061	male_bins_95_identity___30947
COG0532		Translation initiation factor IF-2	2	2	1	1008	9196	1008	6193		2072	3122	2597					male_bins_95_identity___27064	male_bins_95_identity___25250
group_387	COG0184	Ribosomal protein S15P/S13E (RpsO) (PDB:4V4H)	2	2	1	1008	9202	1008	6199		266	266	266					male_bins_95_identity___27070	male_bins_95_identity___16297
group_388	COG1185	Polyribonucleotide nucleotidyltransferase (polynucleotide phosphorylase) (Pnp) (PDB:1E3P)	2	2	1	1008	9203	1008	6149		2126	2126	2126					male_bins_95_identity___27071	male_bins_95_identity___16296
COG0784		CheY-like REC (receiver) domain	2	2	1	1008	9221	1008	6131		896	896	896					male_bins_95_identity___27089	male_bins_95_identity___25233
COG2407		L-fucose isomerase or related protein (FucI) (PDB:1FUI) (PUBMED:22865846)	2	2	1	1008	1596	1008	2389		1484	1484	1484					male_bins_95_identity___27161	male_bins_95_identity___5692
COG2848		Uncharacterized conserved protein	2	2	1	1008	1560	1008	5559		1364	1364	1364					male_bins_95_identity___27197	male_bins_95_identity___13930
COG3459		Cellobiose phosphorylase (PDB:1V7V) (PUBMED:17307853)	2	2	1	1008	10264	1008	10026		308	2435	1371					male_bins_95_identity___28025	male_bins_95_identity___33602
group_393	COG0297	Glycogen synthase (GlgA) (PDB:1RZU)	2	2	1	1008	10253	1008	10037		1385	1448	1416					male_bins_95_identity___28036	male_bins_95_identity___22378
COG0458		Carbamoylphosphate synthase large subunit (CarB) (PDB:1C30)	2	2	1	1008	10244	1008	9235		3197	3197	3197					male_bins_95_identity___28045	male_bins_95_identity___22388
COG1454		Alcohol dehydrogenase	2	2	1	1008	3438	1008	3991		1148	1148	1148					male_bins_95_identity___28725	male_bins_95_identity___38426
group_396	COG0360	Ribosomal protein S6 (RpsF) (PDB:4V4H)	2	2	1	1010	103	1010	30		290	290	290					male_bins_95_identity___29872	male_bins_95_identity___20570
COG2221		Dissimilatory sulfite reductase (desulfoviridin)	2	2	1	1010	114	1010	48		170	170	170					male_bins_95_identity___29880	male_bins_95_identity___20562
group_398			2	2	1	1010	119	1010	53		203	203	203					male_bins_95_identity___29885	male_bins_95_identity___20553
group_399	COG0395	ABC-type glycerol-3-phosphate transport system	2	2	1	1008	10293	1008	9989		914	917	915					male_bins_95_identity___36536	male_bins_95_identity___33631
group_4	COG1882	Pyruvate-formate lyase (PflD) (PDB:1CM5)	2	2	1	1818	165	1818	170		242	245	243							male_bins_95_identity___33508							male_bins_95_identity___24764
group_408			2	2	1	1009	478	1009	998		269	269	269						male_bins_95_identity___1694	male_bins_95_identity___12495
COG3682		Transcriptional regulator	2	2	1	1008	8901	1008	8484		407	407	407						male_bins_95_identity___19423								male_bins_95_identity___29211
group_416			2	2	1	1009	584	1009	88		923	923	923						male_bins_95_identity___33596			male_bins_95_identity___33725
group_417	COG1136	ABC-type lipoprotein export system	2	2	1	1010	504	1010	597		767	767	767						male_bins_95_identity___35810	male_bins_95_identity___35095
group_418	COG0745	DNA-binding response regulator	2	2	1	1010	503	1010	596		662	698	680						male_bins_95_identity___35811	male_bins_95_identity___35094
group_423	COG0191	Fructose/tagatose bisphosphate aldolase (Fba) (PDB:1B57)	2	2	1	1008	3948	1008	3555		863	863	863							male_bins_95_identity___4560							male_bins_95_identity___6097
group_424	COG0443	Molecular chaperone DnaK (HSP70) (DnaK) (PDB:3I33)	2	2	1	1008	3963	1008	3583		1871	1880	1875							male_bins_95_identity___4581							male_bins_95_identity___6082
COG4472		Uncharacterized conserved protein	2	2	1	1008	3985	1008	3600		263	269	266							male_bins_95_identity___4593							male_bins_95_identity___6071
COG1925		HPr or related phosphotransfer protein (PtsH) (PDB:1CM2)	2	2	1	1008	4124	1008	3640		263	263	263							male_bins_95_identity___4633							male_bins_95_identity___26559
COG0360		Ribosomal protein S6 (RpsF) (PDB:4V4H)	2	2	1	1008	4128	1008	3644		293	293	293							male_bins_95_identity___4637							male_bins_95_identity___26555
group_428	COG0056	FoF1-type ATP synthase	2	2	1	1008	4448	1008	3896		1505	1538	1521							male_bins_95_identity___4670							male_bins_95_identity___26515
group_429	COG0055	FoF1-type ATP synthase	2	2	1	1008	4445	1008	3894		1403	1403	1403							male_bins_95_identity___4672							male_bins_95_identity___26513
COG2088		DNA-binding protein SpoVG	2	2	1	1008	4424	1008	3877		272	272	272							male_bins_95_identity___4689							male_bins_95_identity___26492
COG0745		DNA-binding response regulator	2	2	1	1008	8662	1008	7712		692	692	692							male_bins_95_identity___5461							male_bins_95_identity___40732
group_432	COG1866	Phosphoenolpyruvate carboxykinase	2	2	1	1008	8588	1008	6887		1715	1715	1715							male_bins_95_identity___5482							male_bins_95_identity___37915
COG0714		MoxR-like ATPase (MoxR) (PDB:2R44)	2	2	1	1008	8751	1008	6790		821	821	821							male_bins_95_identity___5519							male_bins_95_identity___23963
COG3825		Uncharacterized CoxE-like protein	2	2	1	1008	8752	1008	6789		1190	1205	1197							male_bins_95_identity___5520							male_bins_95_identity___23964
COG0129		Dihydroxyacid dehydratase/phosphogluconate dehydratase (IlvD) (PDB:2GP4)	2	2	1	1008	8762	1008	794		1673	1673	1673							male_bins_95_identity___5530							male_bins_95_identity___40713
COG1087		UDP-glucose 4-epimerase (GalE) (PDB:1A9Y)	2	2	1	1008	7001	1008	8039		1016	1016	1016							male_bins_95_identity___6583							male_bins_95_identity___27617
COG2357		ppGpp synthetase catalytic domain (RelA/SpoT-type nucleotidyltranferase) (YjbM) (PDB:5F2V)	2	2	1	1008	7011	1008	8052		632	635	633							male_bins_95_identity___6587							male_bins_95_identity___27601
COG0192		S-adenosylmethionine synthetase (MetK) (PDB:1FUG)	2	2	1	1008	7021	1008	8059		1187	1187	1187							male_bins_95_identity___6594							male_bins_95_identity___27591
COG0782		Transcription elongation factor	2	2	1	1008	7056	1008	8088		482	482	482							male_bins_95_identity___6608							male_bins_95_identity___28343
COG0236		Acyl carrier protein (AcpP) (PDB:1ACP)	2	2	1	1819	134	1819	139		242	263	252							male_bins_95_identity___7443							male_bins_95_identity___13156
group_441			2	2	1	1009	971	1009	778		200	800	500							male_bins_95_identity___8608							male_bins_95_identity___31962
COG4335		3-methylpurine DNA glycosylase AlkC (AlkC)	2	2	1	1009	1033	1009	694		395	446	420							male_bins_95_identity___8669							male_bins_95_identity___34745
COG1695		DNA-binding transcriptional regulator	2	2	1	1009	98	1009	476		323	323	323							male_bins_95_identity___10990							male_bins_95_identity___9187
COG0740		ATP-dependent protease ClpP	2	2	1	1009	169	1009	531		596	599	597							male_bins_95_identity___11045							male_bins_95_identity___15489
group_446	COG0205	6-phosphofructokinase (PfkA) (PDB:1KZH)	2	2	1	1009	1210	1009	573		1229	1232	1230							male_bins_95_identity___11087							male_bins_95_identity___38771
group_447			2	2	1	1009	866	1009	1116		167	218	192							male_bins_95_identity___12429							male_bins_95_identity___16660
group_448			2	2	1	1009	483	1009	1044		341	842	591							male_bins_95_identity___12490		male_bins_95_identity___38590
COG0149		Triosephosphate isomerase (TpiA) (PDB:1HG3)	2	2	1	1010	344	1010	555		746	749	747							male_bins_95_identity___13668							male_bins_95_identity___6062
group_450	COG0126	3-phosphoglycerate kinase (Pgk) (PDB:13PK)	2	2	1	1010	343	1010	534		1223	1232	1227							male_bins_95_identity___13669							male_bins_95_identity___6063
group_451	COG2052	Regulator of extracellular matrix RemA	2	2	1	1010	260	1010	451		266	266	266							male_bins_95_identity___13688							male_bins_95_identity___5121
COG0297		Glycogen synthase (GlgA) (PDB:1RZU)	2	2	1	1010	241	1010	445		1445	1499	1472							male_bins_95_identity___13694							male_bins_95_identity___5127
group_453	COG2894	Septum site-determining ATPase MinD (MinD) (PDB:4V02)	2	2	1	1008	8337	1008	7188		791	791	791							male_bins_95_identity___14714							male_bins_95_identity___28395
group_454	COG1803	Methylglyoxal synthase (MgsA) (PDB:1S8A) (PUBMED:9665712)	2	2	1	1008	8343	1008	7195		395	437	416							male_bins_95_identity___14717							male_bins_95_identity___28398
COG0065		Homoaconitase/3-isopropylmalate dehydratase large subunit (LeuC) (PDB:4KP1)	2	2	1	1008	8455	1008	7268		1265	1265	1265							male_bins_95_identity___14778							male_bins_95_identity___37825
group_456	COG0059	Ketol-acid reductoisomerase (IlvC) (PDB:1NP3)	2	2	1	1008	8466	1008	7280		1016	1016	1016							male_bins_95_identity___14781							male_bins_95_identity___37828
group_457	COG0166	Glucose-6-phosphate isomerase (Pgi) (PDB:1B0Z)	2	2	1	1008	5767	1008	1567		1346	1346	1346							male_bins_95_identity___17057							male_bins_95_identity___32988
group_458			2	2	1	1008	5532	1008	1202		92	203	147							male_bins_95_identity___18217							male_bins_95_identity___36110
group_459	COG2025	Electron transfer flavoprotein	2	2	1	1008	5585	1008	1255		1043	1046	1044							male_bins_95_identity___18270							male_bins_95_identity___18930
COG2086		Electron transfer flavoprotein	2	2	1	1008	5586	1008	1256		782	782	782							male_bins_95_identity___18271							male_bins_95_identity___18931
COG1250		3-hydroxyacyl-CoA dehydrogenase (FadB) (PDB:5ZQZ)	2	2	1	1008	5589	1008	1259		839	839	839							male_bins_95_identity___18273							male_bins_95_identity___18934
group_462	COG1024	Enoyl-CoA hydratase/carnithine racemase (CaiD) (PDB:1DCI)	2	2	1	1008	5590	1008	1260		785	785	785							male_bins_95_identity___18274							male_bins_95_identity___18935
group_463	COG0183	Acetyl-CoA acetyltransferase (PaaJ) (PDB:1AFW)	2	2	1	1008	5606	1008	1276		1190	1199	1194							male_bins_95_identity___18275							male_bins_95_identity___18936
group_464			2	2	1	1824	57	1824	57		149	152	150							male_bins_95_identity___19266							male_bins_95_identity___22918
group_465			2	2	1	1824	47	1824	44		119	119	119							male_bins_95_identity___19275							male_bins_95_identity___22926
group_466	COG0745	DNA-binding response regulator	2	2	1	1008	5332	1008	1440		689	689	689							male_bins_95_identity___21970							male_bins_95_identity___32898
COG1592		Rubrerythrin (YotD) (PDB:1B71)	2	2	1	1008	5344	1008	1428		539	539	539							male_bins_95_identity___21982		male_bins_95_identity___23776
COG1773		Flavorubredoxin (NorV) (PDB:4D02)	2	2	1	1008	5375	1008	1444		173	173	173							male_bins_95_identity___21983							male_bins_95_identity___32902
COG1188		Ribosomal 50S subunit-recycling heat shock protein	2	2	1	1008	5667	1008	1467		242	242	242							male_bins_95_identity___22011							male_bins_95_identity___32925
COG4219		Signal transducer regulating beta-lactamase production	2	2	1	1008	5618	1008	1288		536	1622	1079							male_bins_95_identity___22060							male_bins_95_identity___18948
group_471	COG3682	Transcriptional regulator	2	2	1	1008	5480	1008	1150		266	359	312							male_bins_95_identity___22061							male_bins_95_identity___25607
group_472	COG0090	Ribosomal protein L2 (RplB) (PDB:1VS6)	2	2	1	1008	10386	1008	9802		842	845	843							male_bins_95_identity___24323							male_bins_95_identity___34021
group_473	COG0185	Ribosomal protein S19 (RpsS) (PDB:4V4H)	2	2	1	1008	10387	1008	9798		281	281	281							male_bins_95_identity___24324							male_bins_95_identity___34020
group_474	COG0091	Ribosomal protein L22 (RplV) (PDB:1VS6)	2	2	1	1008	10388	1008	9797		386	392	389							male_bins_95_identity___24325							male_bins_95_identity___34019
group_475	COG0092	Ribosomal protein S3 (RpsC) (PDB:1VS6)	2	2	1	1008	10389	1008	9796		656	656	656							male_bins_95_identity___24326							male_bins_95_identity___34018
group_476	COG0197	Ribosomal protein L16/L10AE (RplP) (PDB:1WKI)	2	2	1	1008	10390	1008	9795		437	440	438							male_bins_95_identity___24327							male_bins_95_identity___34017
COG0255		Ribosomal protein L29 (RpmC) (PDB:1VS6)	2	2	1	1008	10391	1008	9794		209	209	209							male_bins_95_identity___24328							male_bins_95_identity___34016
group_478	COG0186	Ribosomal protein S17 (RpsQ) (PDB:4V4H)	2	2	1	1008	10392	1008	9834		254	254	254							male_bins_95_identity___24329							male_bins_95_identity___34015
group_479	COG0094	Ribosomal protein L5 (RplE) (PDB:1VS6)	2	2	1	1008	80	1008	9618		539	539	539							male_bins_95_identity___24332							male_bins_95_identity___34012
group_480	COG0096	Ribosomal protein S8 (RpsH) (PDB:4V4H)	2	2	1	1008	333	1008	9581		401	401	401							male_bins_95_identity___24334							male_bins_95_identity___34010
group_481	COG0256	Ribosomal protein L18 (RplR) (PDB:1VS6)	2	2	1	1008	331	1008	9579		368	368	368							male_bins_95_identity___24336							male_bins_95_identity___34008
group_482	COG0098	Ribosomal protein S5 (RpsE) (PDB:4V4H)	2	2	1	1008	330	1008	9578		509	509	509							male_bins_95_identity___24337							male_bins_95_identity___34007
COG0201		Preprotein translocase subunit SecY (SecY) (PDB:1RH5)	2	2	1	1008	327	1008	9574		119	1313	716							male_bins_95_identity___24340							male_bins_95_identity___34004
COG0499		S-adenosylhomocysteine hydrolase (SAM1) (PDB:1A7A)	2	2	1	1008	5795	1008	1595		1247	1247	1247							male_bins_95_identity___25914							male_bins_95_identity___33016
COG3839		ABC-type sugar transport system	2	2	1	1008	1965	1008	1703		1109	1109	1109							male_bins_95_identity___27024							male_bins_95_identity___31197
group_486	COG0205	6-phosphofructokinase (PfkA) (PDB:1KZH)	2	2	1	1008	1983	1008	1747		1073	1073	1073							male_bins_95_identity___27036							male_bins_95_identity___31179
COG0423		Glycyl-tRNA synthetase	2	2	1	1008	5980	1008	736		1388	1406	1397							male_bins_95_identity___28696							male_bins_95_identity___29108
group_488	COG4974	Site-specific recombinase XerD (XerD) (PDB:1A0P)	2	2	1	1821	28	1821	18		284	377	330							male_bins_95_identity___29809							male_bins_95_identity___8077
group_489	COG5811	Sporulation sigma factor SigE (mother cell-specific	2	2	1	1821	48	1821	92		740	740	740							male_bins_95_identity___29825							male_bins_95_identity___18911
COG5813		Sporulation sigma factor SigG (forespore-specific	2	2	1	1821	50	1821	86		779	779	779							male_bins_95_identity___29828							male_bins_95_identity___18909
COG0231		Translation elongation factor P (EF-P)/translation initiation factor 5A (eIF-5A) (Efp) (PDB:1UEB)	2	2	1	1821	103	1821	77		557	557	557							male_bins_95_identity___29838							male_bins_95_identity___18900
COG0334		Glutamate dehydrogenase/leucine dehydrogenase (GdhA) (PDB:1B3B) (PUBMED:24391520)	2	2	1	1821	98	1821	72		1334	1346	1340							male_bins_95_identity___29842							male_bins_95_identity___39782
group_493			2	2	1	1008	4974	1008	2637		191	206	198							male_bins_95_identity___31591							male_bins_95_identity___29249
COG1186		Protein chain release factor PrfB (PrfB) (PDB:1GQE)	2	2	1	1008	5037	1008	2712		995	995	995							male_bins_95_identity___31611							male_bins_95_identity___2143
COG1536		Flagellar motor switch protein FliG (FliG) (PDB:4FHR)	2	2	1	1008	6744	1008	6573		1013	1016	1014							male_bins_95_identity___32371							male_bins_95_identity___19819
COG0052		Ribosomal protein S2 (RpsB) (PDB:4V4H)	2	2	1	1008	6632	1008	6652		746	749	747							male_bins_95_identity___32407							male_bins_95_identity___19855
group_497	COG0195	Transcription antitermination factor NusA	2	2	1	1818	178	1818	103		1214	1271	1242							male_bins_95_identity___33496							male_bins_95_identity___24776
COG0184		Ribosomal protein S15P/S13E (RpsO) (PDB:4V4H)	2	2	1	1818	167	1818	117		266	266	266							male_bins_95_identity___33506							male_bins_95_identity___24766
COG1185		Polyribonucleotide nucleotidyltransferase (polynucleotide phosphorylase) (Pnp) (PDB:1E3P)	2	2	1	1818	166	1818	118		2090	2090	2090							male_bins_95_identity___33507							male_bins_95_identity___24765
COG0574		Phosphoenolpyruvate synthase/pyruvate phosphate dikinase (PpsA) (PDB:5HV6)	2	2	1	1818	37	1818	146		2618	2630	2624							male_bins_95_identity___33532							male_bins_95_identity___36158
COG1217		Predicted membrane GTPase TypA/BipA involved in stress response (TypA) (PDB:5A9V)	2	2	1	1008	7558	1008	7428		1844	1844	1844							male_bins_95_identity___34442							male_bins_95_identity___5166
COG0459		Chaperonin GroEL (HSP60 family) (GroEL) (PDB:1AON)	2	2	1	1010	480	1010	573		1625	1625	1625							male_bins_95_identity___35078							male_bins_95_identity___6044
COG1314		Protein translocase subunit SecG (SecG) (PDB:2AKH)	2	2	1	1010	469	1010	321		239	239	239							male_bins_95_identity___36455							male_bins_95_identity___6033
COG0086		DNA-directed RNA polymerase	2	2	1	2	26	2	80		176	4319	2247										male_bins_95_identity___4023	male_bins_95_identity___28242
COG0096		Ribosomal protein S8 (RpsH) (PDB:4V4H)	2	2	1	2	173	2	184		398	398	398										male_bins_95_identity___4052	male_bins_95_identity___36831
group_511	COG0205	6-phosphofructokinase (PfkA) (PDB:1KZH)	2	2	1	3	144	3	115		980	980	980										male_bins_95_identity___17404	male_bins_95_identity___28989
group_513	COG0254	Ribosomal protein L31 (RpmE) (PDB:1VS6)	2	2	1	5	85	5	154		254	254	254										male_bins_95_identity___32822					male_bins_95_identity___3223
group_514	COG0184	Ribosomal protein S15P/S13E (RpsO) (PDB:4V4H)	2	2	1	6	55	6	97		275	275	275										male_bins_95_identity___35952	male_bins_95_identity___31838
COG3385		IS4 transposase InsG (InsG)	2	2	1	332	8	339	4		1163	1163	1163											male_bins_95_identity___3062				male_bins_95_identity___5214
group_522			2	2	1	94	22	92	18		221	221	221											male_bins_95_identity___9086				male_bins_95_identity___982
COG0479		Succinate dehydrogenase/fumarate reductase	2	2	1	7	136	7	125		755	755	755											male_bins_95_identity___11670				male_bins_95_identity___4251
group_524	COG0049	Ribosomal protein S7 (RpsG) (PDB:4V4H)	2	2	1	2	118	2	137		476	476	476											male_bins_95_identity___16579				male_bins_95_identity___36991
group_527	COG0185	Ribosomal protein S19 (RpsS) (PDB:4V4H)	2	2	1	2	187	2	155		266	269	267											male_bins_95_identity___36821				male_bins_95_identity___36984
COG1943		REP element-mobilizing transposase RayT (RAYT) (PDB:4ER8)	2	2	1	1	641	1	408		302	509	405													male_bins_95_identity___21079			male_bins_95_identity___34822
COG1881		Uncharacterized conserved protein	2	2	1	9	4	10	4		485	485	485													male_bins_95_identity___22791			male_bins_95_identity___26683
group_9067			2	2	1	1022	15	1022	9		584	584	584				male_bins_95_identity___10932					male_bins_95_identity___37585
group_9068			2	2	1	1022	16	1022	10		299	299	299				male_bins_95_identity___10933					male_bins_95_identity___37584
group_9070			2	2	1	1022	18	1022	12		722	722	722				male_bins_95_identity___10935					male_bins_95_identity___37583
COG4886		Leucine-rich repeat (LRR) protein (LRR) (PDB:4OW2)	2	2	1	1066	10	1066	1		1766	1766	1766				male_bins_95_identity___14643					male_bins_95_identity___28897
group_9167			2	2	1	1066	11	1066	2		674	674	674				male_bins_95_identity___14644					male_bins_95_identity___28898
COG1285		Magnesium uptake protein YhiD/SapB	2	2	1	1066	12	1066	3		674	674	674				male_bins_95_identity___14645					male_bins_95_identity___28899
COG5421		Transposase	2	2	1	1066	13	1066	4		497	497	497				male_bins_95_identity___14646					male_bins_95_identity___28900
group_9228	COG1773	Flavorubredoxin (NorV) (PDB:4D02)	2	2	1	1020	6	1020	27		665	665	665				male_bins_95_identity___19244					male_bins_95_identity___13013
group_9229			2	2	1	1020	5	1020	28		182	182	182				male_bins_95_identity___19245					male_bins_95_identity___13014
group_9230			2	2	1	1020	4	1020	29		482	482	482				male_bins_95_identity___19246					male_bins_95_identity___13015
COG1397		ADP-ribosylglycohydrolase (DraG) (PDB:1T5J)	2	2	1	1020	3	1020	30		371	371	371				male_bins_95_identity___19247					male_bins_95_identity___13016
group_9232			2	2	1	1020	2	1020	31		398	398	398				male_bins_95_identity___19248					male_bins_95_identity___13017
group_9233	COG4335	3-methylpurine DNA glycosylase AlkC (AlkC)	2	2	1	1020	1	1020	1		623	623	623				male_bins_95_identity___19249					male_bins_95_identity___13018
group_9399			2	2	1	1008	1404	1008	5727		164	164	164				male_bins_95_identity___24252	male_bins_95_identity___16197
group_10			1	1	1	182	1	178	5		575	575	575											male_bins_95_identity___17476
group_1000	COG0534	Na+-driven multidrug efflux pump	1	1	1	1354	43	1354	22		1379	1379	1379	male_bins_95_identity___6227
group_10000	COG0840	Methyl-accepting chemotaxis protein (MCP) (Tar) (PDB:1QU7)	1	1	1	1755	145	1755	88		1712	1712	1712					male_bins_95_identity___495
group_10001			1	1	1	1755	144	1755	87		1136	1136	1136					male_bins_95_identity___496
group_10002			1	1	1	1755	143	1755	86		737	737	737					male_bins_95_identity___497
group_10003			1	1	1	1755	141	1755	84		254	254	254					male_bins_95_identity___499
group_10004	COG0534	Na+-driven multidrug efflux pump	1	1	1	1755	140	1755	83		1346	1346	1346					male_bins_95_identity___500
group_10005			1	1	1	1755	139	1755	82		3296	3296	3296					male_bins_95_identity___501
group_10006	COG1344	Flagellin and related hook-associated protein FlgL (FlgL) (PDB:1IO1)	1	1	1	1755	138	1755	81		1829	1829	1829					male_bins_95_identity___502
COG1516		Flagellin-specific chaperone FliS (FliS) (PDB:1ORJ)	1	1	1	1755	137	1755	80		455	455	455					male_bins_95_identity___503
group_10008			1	1	1	1755	136	1755	79		320	320	320					male_bins_95_identity___504
group_10009			1	1	1	1755	135	1755	78		500	500	500					male_bins_95_identity___505
group_1001	COG0840	Methyl-accepting chemotaxis protein (MCP) (Tar) (PDB:1QU7)	1	1	1	1354	44	1354	21		2024	2024	2024	male_bins_95_identity___6228
group_10010			1	1	1	1755	134	1755	77		1004	1004	1004					male_bins_95_identity___506
group_10011	COG4962	Pilus assembly protein	1	1	1	1755	133	1755	76		1232	1232	1232					male_bins_95_identity___507
group_10012	COG4965	Flp pilus assembly protein TadB (TadB)	1	1	1	1755	132	1755	75		782	782	782					male_bins_95_identity___508
group_10013	COG2064	Flp pilus assembly protein TadC (TadC)	1	1	1	1755	131	1755	74		1346	1346	1346					male_bins_95_identity___509
group_10014			1	1	1	1755	130	1755	73		167	167	167					male_bins_95_identity___510
group_10015			1	1	1	1755	129	1755	72		1457	1457	1457					male_bins_95_identity___511
group_10016	COG4961	Flp pilus assembly protein TadG	1	1	1	1755	128	1755	71		899	899	899					male_bins_95_identity___512
group_10017			1	1	1	1755	127	1755	70		446	446	446					male_bins_95_identity___513
group_10018			1	1	1	1755	126	1755	69		506	506	506					male_bins_95_identity___514
group_10019	COG1716	Forkhead associated (FHA) domain	1	1	1	1755	125	1755	68		1427	1427	1427					male_bins_95_identity___515
group_1002	COG0664	cAMP-binding domain of CRP or a regulatory subunit of cAMP-dependent protein kinases (Crp) (PDB:1FT9)	1	1	1	1354	45	1354	20		671	671	671	male_bins_95_identity___6229
group_10020	COG4193	Beta- N-acetylglucosaminidase (LytD) (PDB:6FXO)	1	1	1	1755	124	1755	67		4502	4502	4502					male_bins_95_identity___516
group_10021	COG0768	Cell division protein FtsI	1	1	1	1755	123	1755	66		2882	2882	2882					male_bins_95_identity___517
COG2602		Beta-lactamase class D (YbxI) (PDB:5CTN)	1	1	1	1755	122	1755	65		956	956	956					male_bins_95_identity___518
group_10023	COG2602	Beta-lactamase class D (YbxI) (PDB:5CTN)	1	1	1	1755	121	1755	64		1796	1796	1796					male_bins_95_identity___519
group_10024	COG3682	Transcriptional regulator	1	1	1	1755	120	1755	63		371	371	371					male_bins_95_identity___520
group_10025			1	1	1	1755	119	1755	62		257	257	257					male_bins_95_identity___521
group_10026	COG1132	ABC-type multidrug transport system	1	1	1	1755	118	1755	61		1625	1625	1625					male_bins_95_identity___522
group_10027	COG0745	DNA-binding response regulator	1	1	1	1755	117	1755	60		692	692	692					male_bins_95_identity___523
group_10028	COG2205	K+-sensing histidine kinase KdpD (KdpD) (PDB:2KSF)	1	1	1	1755	116	1755	59		1028	1028	1028					male_bins_95_identity___524
group_10029	COG1136	ABC-type lipoprotein export system	1	1	1	1755	115	1755	58		671	671	671					male_bins_95_identity___525
group_1003	COG0348	Polyferredoxin NapH (NapH) (PUBMED:27322068)	1	1	1	1354	46	1354	19		596	596	596	male_bins_95_identity___6230
group_10030	COG0577	ABC-type antimicrobial peptide transport system	1	1	1	1755	114	1755	57		2552	2552	2552					male_bins_95_identity___526
group_10031	COG0535	Radical SAM superfamily maturase	1	1	1	1755	111	1755	54		494	494	494					male_bins_95_identity___529
group_10032	COG0641	Sulfatase maturation enzyme AslB	1	1	1	1755	110	1755	53		1019	1019	1019					male_bins_95_identity___530
group_10033	COG1404	Serine protease	1	1	1	1755	109	1755	52		650	650	650					male_bins_95_identity___531
group_10034	COG1472	Periplasmic beta-glucosidase and related glycosidases (BglX) (PDB:2X40)	1	1	1	1755	108	1755	51		2786	2786	2786					male_bins_95_identity___532
group_10035	COG3507	Beta-xylosidase (XynB2) (PDB:1Y7B)	1	1	1	1755	107	1755	50		1595	1595	1595					male_bins_95_identity___533
group_10036	COG0395	ABC-type glycerol-3-phosphate transport system	1	1	1	1755	106	1755	49		881	881	881					male_bins_95_identity___534
group_10037	COG4209	ABC-type polysaccharide transport system	1	1	1	1755	105	1755	48		917	917	917					male_bins_95_identity___535
group_10038	COG1653	ABC-type glycerol-3-phosphate transport system	1	1	1	1755	104	1755	47		1532	1532	1532					male_bins_95_identity___536
group_10039	COG4753	Two-component response regulator	1	1	1	1755	103	1755	46		1589	1589	1589					male_bins_95_identity___537
group_1004	COG4231	TPP-dependent indolepyruvate ferredoxin oxidoreductase	1	1	1	1354	47	1354	18		194	194	194	male_bins_95_identity___6231
group_10040	COG2972	Sensor histidine kinase YesM (YesM)	1	1	1	1755	102	1755	45		1742	1742	1742					male_bins_95_identity___538
group_10041	COG1640	4-alpha-glucanotransferase (MalQ) (PDB:1CWY)	1	1	1	1755	101	1755	44		1502	1502	1502					male_bins_95_identity___539
group_10042	COG3694	ABC-type uncharacterized transport system	1	1	1	1755	100	1755	43		788	788	788					male_bins_95_identity___540
group_10043	COG4587	ABC-type uncharacterized transport system	1	1	1	1755	99	1755	42		800	800	800					male_bins_95_identity___541
group_10044	COG4586	ABC-type uncharacterized transport system	1	1	1	1755	98	1755	41		983	983	983					male_bins_95_identity___542
group_10045	COG3279	DNA-binding response regulator	1	1	1	1755	97	1755	40		737	737	737					male_bins_95_identity___543
group_10046			1	1	1	1755	96	1755	39		1310	1310	1310					male_bins_95_identity___544
group_10047			1	1	1	1008	3501	1008	2741		1310	1310	1310					male_bins_95_identity___2597
group_10048			1	1	1	1008	4595	1008	3920		1310	1310	1310					male_bins_95_identity___7564
group_10049			1	1	1	1008	3193	1008	4702		1310	1310	1310					male_bins_95_identity___23440
COG3693		Endo-1	1	1	1	1354	48	1354	17		4916	4916	4916	male_bins_95_identity___6232
group_10050	COG1649	Uncharacterized lipoprotein YddW	1	1	1	1755	95	1755	38		1181	1181	1181					male_bins_95_identity___545
group_10051			1	1	1	1814	1	1815	1	Investigate	488	488	488					male_bins_95_identity___546
group_10052	COG3209	Uncharacterized conserved protein RhaS	1	1	1	1814	2	1815	2	Investigate	710	710	710					male_bins_95_identity___547
group_10053	COG0122	3-methyladenine DNA glycosylase/8-oxoguanine DNA glycosylase (AlkA) (PDB:1DIZ)	1	1	1	1008	5847	1008	1866		812	812	812					male_bins_95_identity___1459
group_10054			1	1	1	1008	5848	1008	1867		485	485	485					male_bins_95_identity___1460
group_10055			1	1	1	1008	5849	1008	1868		617	617	617					male_bins_95_identity___1461
group_10056	COG0127	Inosine/xanthosine triphosphate pyrophosphatase	1	1	1	1008	5850	1008	1869		635	635	635					male_bins_95_identity___1462
group_10057	COG0668	Small-conductance mechanosensitive channel (MscS) (PDB:2OAU)	1	1	1	1008	5851	1008	1870		911	911	911					male_bins_95_identity___1463
group_10058	COG4198	Uncharacterized conserved protein	1	1	1	1008	5852	1008	1871		1241	1241	1241					male_bins_95_identity___1464
COG4826		Serine protease inhibitor (SERPIN)	1	1	1	1008	5853	1008	1872		1202	1202	1202					male_bins_95_identity___1465
group_1006	COG1680	CubicO group peptidase	1	1	1	1354	49	1354	16		1001	1001	1001	male_bins_95_identity___6233
group_10060	COG4826	Serine protease inhibitor (SERPIN)	1	1	1	1008	5854	1008	1873		1310	1310	1310					male_bins_95_identity___1466
group_10061			1	1	1	1008	5855	1008	1874		884	884	884					male_bins_95_identity___1467
group_10062	COG1595	DNA-directed RNA polymerase specialized sigma subunit	1	1	1	1008	5856	1008	1875		557	557	557					male_bins_95_identity___1468
group_10063			1	1	1	1008	5857	1008	1876		275	275	275					male_bins_95_identity___1469
group_10064	COG0111	Phosphoglycerate dehydrogenase or related dehydrogenase (SerA) (PDB:3OET)	1	1	1	1008	5858	1008	1877		1163	1163	1163					male_bins_95_identity___1470
group_10065	COG0028	Acetolactate synthase large subunit or other thiamine pyrophosphate-requiring enzyme (IlvB) (PDB:1BFD)	1	1	1	1008	5895	1008	1879		1679	1679	1679					male_bins_95_identity___1472
group_10066	COG0473	Isocitrate/isopropylmalate dehydrogenase (LeuB) (PDB:1GC9)	1	1	1	1008	9065	1008	960		1100	1100	1100					male_bins_95_identity___1474
group_10067	COG1862	Protein translocase subunit YajC (YajC)	1	1	1	1008	9064	1008	959		326	326	326					male_bins_95_identity___1475
group_10068			1	1	1	1008	9063	1008	958		980	980	980					male_bins_95_identity___1476
group_10069	COG0343	Queuine/archaeosine tRNA-ribosyltransferase (Tgt) (PDB:1XW8) (PUBMED:15805528)	1	1	1	1008	9062	1008	957		1136	1136	1136					male_bins_95_identity___1477
group_1007	COG0642	Signal transduction histidine kinase (BaeS) (PDB:1JOY)	1	1	1	1354	50	1354	15		1214	1214	1214	male_bins_95_identity___6234
group_10070	COG0082	Chorismate synthase (AroC) (PDB:1Q1L)	1	1	1	1008	9061	1008	956		1127	1127	1127					male_bins_95_identity___1478
group_10071	COG2706	6-phosphogluconolactonase	1	1	1	1008	9060	1008	6200		1055	1055	1055					male_bins_95_identity___1479
group_10072	COG2310	Stress response protein SCP2 (TerZ) (PDB:2QNG)	1	1	1	1008	9059	1008	6201		1337	1337	1337					male_bins_95_identity___1480
group_10073			1	1	1	1008	9058	1008	6202		2195	2195	2195					male_bins_95_identity___1481
group_10074	COG1131	ABC-type multidrug transport system	1	1	1	1008	9057	1008	6203		902	902	902					male_bins_95_identity___1482
group_10075	COG1725	DNA-binding transcriptional regulator YhcF	1	1	1	1008	9056	1008	6204		407	407	407					male_bins_95_identity___1483
group_10077	COG0006	Xaa-Pro aminopeptidase (PepP) (PDB:1A16)	1	1	1	1008	9054	1008	6219		1796	1796	1796					male_bins_95_identity___1485
group_10078	COG0274	Deoxyribose-phosphate aldolase (DeoC) (PDB:1J2W)	1	1	1	1008	9053	1008	6220		659	659	659					male_bins_95_identity___1486
group_10079			1	1	1	1008	9052	1008	6221		344	344	344					male_bins_95_identity___1487
group_1008	COG0745	DNA-binding response regulator	1	1	1	1354	51	1354	14		668	668	668	male_bins_95_identity___6235
COG0498		Threonine synthase (ThrC) (PDB:1VB3)	1	1	1	1008	9051	1008	6222		1487	1487	1487					male_bins_95_identity___1488
group_10081			1	1	1	1008	9050	1008	6223		1115	1115	1115					male_bins_95_identity___1489
group_10082	COG3773	Cell wall hydrolase CwlJ	1	1	1	1008	9049	1008	6224		602	602	602					male_bins_95_identity___1490
group_10083	COG3279	DNA-binding response regulator	1	1	1	1008	9048	1008	6225		728	728	728					male_bins_95_identity___1491
group_10084	COG3290	Sensor histidine kinase DipB regulating citrate/malate metabolism (CitA)	1	1	1	1008	9047	1008	6226		1286	1286	1286					male_bins_95_identity___1492
group_10085			1	1	1	1008	9046	1008	6227		764	764	764					male_bins_95_identity___1493
group_10086			1	1	1	1008	9045	1008	6228		797	797	797					male_bins_95_identity___1494
group_10087	COG3757	Lyzozyme M1 (1	1	1	1	1008	9044	1008	6229		1331	1331	1331					male_bins_95_identity___1495
group_10088	COG1477	FAD:protein FMN transferase ApbE (ApbE) (PDB:1VRM) (PUBMED:23558683	1	1	1	1008	9043	1008	6230		1103	1103	1103					male_bins_95_identity___1496
group_10089			1	1	1	1008	9014	1008	8462		179	179	179					male_bins_95_identity___1500
group_1009	COG0845	Multidrug efflux pump subunit AcrA (membrane-fusion protein) (AcrA) (PDB:1T5E)	1	1	1	1354	52	1354	13		1577	1577	1577	male_bins_95_identity___6236
group_10090			1	1	1	1008	9013	1008	8461		194	194	194					male_bins_95_identity___1501
group_10091	COG0534	Na+-driven multidrug efflux pump	1	1	1	1008	9012	1008	8460		1331	1331	1331					male_bins_95_identity___1502
group_10092	COG0456	Ribosomal protein S18 acetylase RimI and related acetyltransferases (RimI) (PDB:1GHE)	1	1	1	1008	9011	1008	8459		407	407	407					male_bins_95_identity___1503
group_10093	COG0534	Na+-driven multidrug efflux pump	1	1	1	1008	9010	1008	8458		1202	1202	1202					male_bins_95_identity___1504
group_10094			1	1	1	1008	9009	1008	8457		284	284	284					male_bins_95_identity___1505
group_10095	COG3546	Mn-containing catalase (includes spore coat protein CotJC) (CotJC) (PDB:1JKU) (PUBMED:20434458)	1	1	1	1008	9008	1008	8456		575	575	575					male_bins_95_identity___1506
group_10096	COG5883	Spore coat protein CotJB (CotJB) (PUBMED:7768848)	1	1	1	1008	9007	1008	8455		287	287	287					male_bins_95_identity___1507
group_10097			1	1	1	1008	9006	1008	8454		173	173	173					male_bins_95_identity___1508
group_10098	COG1266	Membrane protease YdiL	1	1	1	1008	9005	1008	8453		1034	1034	1034					male_bins_95_identity___1509
group_10099			1	1	1	1008	9004	1008	8452		458	458	458					male_bins_95_identity___1510
group_1010	COG0845	Multidrug efflux pump subunit AcrA (membrane-fusion protein) (AcrA) (PDB:1T5E)	1	1	1	1354	53	1354	12		1850	1850	1850	male_bins_95_identity___6237
group_10100	COG3290	Sensor histidine kinase DipB regulating citrate/malate metabolism (CitA)	1	1	1	1008	9003	1008	8451		1283	1283	1283					male_bins_95_identity___1511
group_10101	COG3279	DNA-binding response regulator	1	1	1	1008	9002	1008	8450		722	722	722					male_bins_95_identity___1512
group_10102	COG5840	Stage V sporulation protein SpoVAF	1	1	1	1008	9001	1008	8449		1400	1400	1400					male_bins_95_identity___1513
group_10103	COG0493	NADPH-dependent glutamate synthase beta chain or related oxidoreductase (GltD) (PDB:1H7X)	1	1	1	1008	9000	1008	8448		1493	1493	1493					male_bins_95_identity___1514
group_10104	COG0067	Glutamate synthase domain 1 (GltB1) (PDB:1EA0)	1	1	1	1008	8999	1008	8447		4682	4682	4682					male_bins_95_identity___1515
group_10105	COG0646	Methionine synthase I (cobalamin-dependent)	1	1	1	1008	8998	1008	8446		2405	2405	2405					male_bins_95_identity___1516
group_10106	COG1410	Methionine synthase I	1	1	1	1008	8997	1008	8445		686	686	686					male_bins_95_identity___1517
group_10107			1	1	1	1008	8996	1008	8444		245	245	245					male_bins_95_identity___1518
group_10108			1	1	1	1008	8995	1008	8443		569	569	569					male_bins_95_identity___1519
group_10109	COG1523	Pullulanase/glycogen debranching enzyme (PulA) (PDB:2WSK)	1	1	1	1008	8994	1008	8442		2024	2024	2024					male_bins_95_identity___1520
group_1011	COG0845	Multidrug efflux pump subunit AcrA (membrane-fusion protein) (AcrA) (PDB:1T5E)	1	1	1	1354	11	1354	11		1706	1706	1706	male_bins_95_identity___6238
group_10110	COG0846	NAD-dependent protein deacetylase	1	1	1	1008	8993	1008	8441		746	746	746					male_bins_95_identity___1521
group_10111	COG3906	Uncharacterized conserved protein YrzB	1	1	1	1008	8992	1008	8440		323	323	323					male_bins_95_identity___1522
group_10112	COG1655	Uncharacterized conserved protein	1	1	1	1008	8991	1008	8439		758	758	758					male_bins_95_identity___1523
group_10113	COG0210	Superfamily I DNA or RNA helicase (UvrD) (PDB:6PPR)	1	1	1	1008	8990	1008	8438		1883	1883	1883					male_bins_95_identity___1524
group_10114	COG0008	Glutamyl- or glutaminyl-tRNA synthetase (GlnS) (PDB:1EUQ)	1	1	1	1008	8989	1008	8437		1463	1463	1463					male_bins_95_identity___1525
group_10115	COG1082	Sugar phosphate isomerase/epimerase (YcjR) (PDB:3KTC) (PUBMED:30742415)	1	1	1	1008	8987	1008	6271		836	836	836					male_bins_95_identity___1527
group_10116	COG4677	Pectin methylesterase and related acyl-CoA thioesterases (PemB) (PDB:1GQ8)	1	1	1	1008	8986	1008	6270		956	956	956					male_bins_95_identity___1528
group_10117	COG4225	Rhamnogalacturonyl hydrolase YesR (YesR) (PDB:1NC5)	1	1	1	1008	8985	1008	6269		1136	1136	1136					male_bins_95_identity___1529
group_10118	COG5434	Polygalacturonase (Pgu1) (PDB:1BHE)	1	1	1	1008	8984	1008	6268		1556	1556	1556					male_bins_95_identity___1530
group_10119	COG3408	Glycogen debranching enzyme (alpha-1	1	1	1	1008	8983	1008	6267		2021	2021	2021					male_bins_95_identity___1531
group_1012	COG0577	ABC-type antimicrobial peptide transport system	1	1	1	1354	10	1354	10		1259	1259	1259	male_bins_95_identity___6239
group_10120			1	1	1	1008	8982	1008	6266		416	416	416					male_bins_95_identity___1532
group_10121	COG3263	NhaP-type Na+/H+ and K+/H+ antiporter with C-terminal TrkAC and CorC domains (NhaP2)	1	1	1	1008	8981	1008	6265		1730	1730	1730					male_bins_95_identity___1533
group_10122	COG0426	Flavorubredoxin (NorV) (PDB:4JHC)	1	1	1	1008	8980	1008	6264		1160	1160	1160					male_bins_95_identity___1534
group_10123			1	1	1	1008	8979	1008	6263		278	278	278					male_bins_95_identity___1535
group_10124	COG2197	DNA-binding response regulator	1	1	1	1008	8978	1008	6262		896	896	896					male_bins_95_identity___1536
group_10125	COG0642	Signal transduction histidine kinase (BaeS) (PDB:1JOY)	1	1	1	1008	8977	1008	6261		2690	2690	2690					male_bins_95_identity___1537
group_10126	COG0662	Mannose-6-phosphate isomerase	1	1	1	1008	8976	1008	6260		866	866	866					male_bins_95_identity___1538
group_10127	COG1653	ABC-type glycerol-3-phosphate transport system	1	1	1	1008	8975	1008	6259		1436	1436	1436					male_bins_95_identity___1539
group_10128	COG1175	ABC-type sugar transport system	1	1	1	1008	8974	1008	6258		893	893	893					male_bins_95_identity___1540
group_10129	COG0395	ABC-type glycerol-3-phosphate transport system	1	1	1	1008	8973	1008	6257		884	884	884					male_bins_95_identity___1541
group_1013	COG1136	ABC-type lipoprotein export system	1	1	1	1354	9	1354	9		662	662	662	male_bins_95_identity___6240
group_10130			1	1	1	1008	8972	1008	6256		164	164	164					male_bins_95_identity___1542
group_10131			1	1	1	1008	8971	1008	6255		2162	2162	2162					male_bins_95_identity___1543
group_10132	COG2334	Ser/Thr protein kinase RdoA involved in Cpx stress response	1	1	1	1008	8970	1008	6254		1127	1127	1127					male_bins_95_identity___1544
group_10133	COG3858	Spore cortex hydrolase SleL/YaaH	1	1	1	1008	8969	1008	6253		1133	1133	1133					male_bins_95_identity___1545
group_10134	COG1404	Serine protease	1	1	1	1008	8968	1008	6252		1496	1496	1496					male_bins_95_identity___1546
group_10135	COG0840	Methyl-accepting chemotaxis protein (MCP) (Tar) (PDB:1QU7)	1	1	1	1008	8967	1008	6251		1691	1691	1691					male_bins_95_identity___1547
group_10136	COG1227	Inorganic pyrophosphatase/exopolyphosphatase (PPX1) (PDB:1I74)	1	1	1	1008	8966	1008	6250		1838	1838	1838					male_bins_95_identity___1548
group_10137			1	1	1	1008	8965	1008	6249		206	206	206					male_bins_95_identity___1549
group_10138			1	1	1	1008	9338	1008	6248		200	200	200					male_bins_95_identity___1550
group_10139			1	1	1	1008	9339	1008	6247		605	605	605					male_bins_95_identity___1551
group_1014	COG2204	DNA-binding transcriptional response regulator	1	1	1	1354	8	1354	8		644	644	644	male_bins_95_identity___6241
group_10140	COG2155	Uncharacterized membrane protein YuzA	1	1	1	1008	9340	1008	6246		215	215	215					male_bins_95_identity___1552
group_10141	COG0330	Regulator of protease activity HflC	1	1	1	1008	9341	1008	6245		869	869	869					male_bins_95_identity___1553
group_10142	COG0330	Regulator of protease activity HflC	1	1	1	1008	9342	1008	6244		1061	1061	1061					male_bins_95_identity___1554
group_10143	COG2195	Di- or tripeptidase (PepD2) (PDB:2QYV)	1	1	1	1008	9343	1008	6243		1448	1448	1448					male_bins_95_identity___1555
group_10144	COG1854	S-ribosylhomocysteine lyase LuxS	1	1	1	1008	9344	1008	6242		479	479	479					male_bins_95_identity___1556
group_10145			1	1	1	1008	9345	1008	6241		689	689	689					male_bins_95_identity___1557
group_10146	COG1051	ADP-ribose pyrophosphatase YjhB	1	1	1	1008	9346	1008	6240		518	518	518					male_bins_95_identity___1558
group_10147	COG0735	Fe2+ or Zn2+ uptake regulation protein Fur/Zur (Fur) (PDB:1MZB)	1	1	1	1008	9347	1008	6239		434	434	434					male_bins_95_identity___1559
group_10148	COG3663	G:T/U-mismatch repair DNA glycosylase (Mug) (PDB:1MTL)	1	1	1	1008	9348	1008	6238		530	530	530					male_bins_95_identity___1560
group_10149	COG1451	UTP pyrophosphatase	1	1	1	1008	9349	1008	6237		746	746	746					male_bins_95_identity___1561
group_1015			1	1	1	1354	7	1354	7		653	653	653	male_bins_95_identity___6242
group_10150	COG0745	DNA-binding response regulator	1	1	1	1008	9350	1008	6236		761	761	761					male_bins_95_identity___1562
group_10151	COG0642	Signal transduction histidine kinase (BaeS) (PDB:1JOY)	1	1	1	1008	9351	1008	6235		3188	3188	3188					male_bins_95_identity___1563
group_10152	COG0664	cAMP-binding domain of CRP or a regulatory subunit of cAMP-dependent protein kinases (Crp) (PDB:1FT9)	1	1	1	1008	9352	1008	5944		680	680	680					male_bins_95_identity___1565
group_10154	COG2199	GGDEF domain	1	1	1	1008	9359	1008	5950		950	950	950					male_bins_95_identity___1568
group_10155	COG0613	5'-3' exoribonuclease TrpH/YciV (RNase AM)	1	1	1	1008	9360	1008	5951		1658	1658	1658					male_bins_95_identity___1569
group_10156			1	1	1	1008	9362	1008	5953		2117	2117	2117					male_bins_95_identity___1571
group_10157			1	1	1	1008	9363	1008	5954		263	263	263					male_bins_95_identity___1572
group_10158	COG0424	7-methyl-GTP pyrophosphatase and related NTP pyrophosphatases	1	1	1	1008	9364	1008	5955		602	602	602					male_bins_95_identity___1573
group_10159	COG0855	Polyphosphate kinase (Ppk) (PDB:1XDO)	1	1	1	1008	9365	1008	5956		2189	2189	2189					male_bins_95_identity___1574
group_1016	COG1136	ABC-type lipoprotein export system	1	1	1	1354	6	1354	6		1094	1094	1094	male_bins_95_identity___6243
group_10160	COG0248	Exopolyphosphatase/pppGpp-phosphohydrolase (GppA) (PDB:1T6C)	1	1	1	1008	9366	1008	5957		1562	1562	1562					male_bins_95_identity___1575
group_10161	COG0077	Prephenate dehydratase (PheA2) (PDB:1PHZ)	1	1	1	1008	9367	1008	5958		1124	1124	1124					male_bins_95_identity___1576
group_10162			1	1	1	1008	9368	1008	5959		1046	1046	1046					male_bins_95_identity___1577
group_10163	COG4905	Uncharacterized membrane protein (PUBMED:23490197)	1	1	1	1008	9369	1008	5960		443	443	443					male_bins_95_identity___1578
group_10164	COG1686	D-alanyl-D-alanine carboxypeptidase (DacC) (PDB:1HD8)	1	1	1	1008	9370	1008	5961		1289	1289	1289					male_bins_95_identity___1579
group_10165	COG3402	Uncharacterized membrane protein YdbS	1	1	1	1008	9371	1008	5962		365	365	365					male_bins_95_identity___1580
group_10166			1	1	1	1008	9372	1008	5963		203	203	203					male_bins_95_identity___1581
group_10167	COG0540	Aspartate carbamoyltransferase	1	1	1	1008	9373	1008	5964		926	926	926					male_bins_95_identity___1582
COG1781		Aspartate carbamoyltransferase	1	1	1	1008	9374	1008	5965		443	443	443					male_bins_95_identity___1583
group_10169	COG0523	Zinc metallochaperone YeiR/ZagA and related GTPases	1	1	1	1008	9375	1008	5966		932	932	932					male_bins_95_identity___1584
group_1017	COG4591	ABC-type transport system involved in lipoprotein release	1	1	1	1354	5	1354	5		1343	1343	1343	male_bins_95_identity___6244
group_10170	COG2131	Deoxycytidylate deaminase (ComEB) (PDB:2HVV) (PUBMED:25746996	1	1	1	1008	9377	1008	5981		488	488	488					male_bins_95_identity___1586
group_10171			1	1	1	1008	9378	1008	5982		857	857	857					male_bins_95_identity___1587
group_10172	COG1376	Lipoprotein-anchoring transpeptidase ErfK/SrfK (ErfK) (PDB:4LZH)	1	1	1	1008	9379	1008	5983		1838	1838	1838					male_bins_95_identity___1588
group_10173	COG0572	Uridine kinase (Udk) (PDB:5B3F)	1	1	1	1008	9380	1008	5984		1673	1673	1673					male_bins_95_identity___1589
group_10174	COG0327	Putative GTP cyclohydrolase 1 type 2	1	1	1	1008	9381	1008	5985		782	782	782					male_bins_95_identity___1590
group_10175	COG2384	tRNA A22 N1-methylase (TrmK) (PDB:3KR9) (PUBMED:18420655)	1	1	1	1008	9382	1008	5986		827	827	827					male_bins_95_identity___1591
group_10176	COG0358	DNA primase (bacterial type) (DnaG) (PDB:3B39) (PUBMED:28128549)	1	1	1	1008	9384	1008	5903		1787	1787	1787					male_bins_95_identity___1593
group_10177	COG0232	dGTP triphosphohydrolase (Dgt) (PDB:6OI7)	1	1	1	1008	9385	1008	5902		1007	1007	1007					male_bins_95_identity___1594
group_10178	COG0371	Glycerol dehydrogenase or related enzyme	1	1	1	1008	9386	1008	5901		1067	1067	1067					male_bins_95_identity___1595
group_10179	COG3507	Beta-xylosidase (XynB2) (PDB:1Y7B)	1	1	1	1008	9387	1008	5900		524	524	524					male_bins_95_identity___1596
group_1018	COG3177	Fic family protein (PDB:3CUC)	1	1	1	1354	4	1354	4		926	926	926	male_bins_95_identity___6245
group_10180	COG3507	Beta-xylosidase (XynB2) (PDB:1Y7B)	1	1	1	1008	9388	1008	5899		374	374	374					male_bins_95_identity___1597
group_10181	COG2768	Uncharacterized Fe-S cluster protein	1	1	1	1008	9389	1008	5898		866	866	866					male_bins_95_identity___1598
group_10182	COG1443	Isopentenyldiphosphate isomerase (Idi) (PDB:1NFS)	1	1	1	1008	9390	1008	5897		527	527	527					male_bins_95_identity___1599
group_10183	COG0778	Nitroreductase (NfnB) (PDB:1F5V)	1	1	1	1008	9391	1008	5896		542	542	542					male_bins_95_identity___1600
group_10184	COG0719	Fe-S cluster assembly scaffold protein SufB (SufB) (PDB:1VH4)	1	1	1	1008	9392	1008	5895		917	917	917					male_bins_95_identity___1601
group_10185	COG0396	Fe-S cluster assembly ATPase SufC (SufC) (PDB:2D3W)	1	1	1	1008	9393	1008	5894		728	728	728					male_bins_95_identity___1602
group_10186	COG1680	CubicO group peptidase	1	1	1	1008	9394	1008	5893		1181	1181	1181					male_bins_95_identity___1603
group_10187	COG4905	Uncharacterized membrane protein (PUBMED:23490197)	1	1	1	1008	9395	1008	5892		767	767	767					male_bins_95_identity___1604
group_10188	COG1564	Thiamine pyrophosphokinase (ThiN) (PDB:1IG0)	1	1	1	1008	9396	1008	5891		659	659	659					male_bins_95_identity___1605
group_10189	COG0840	Methyl-accepting chemotaxis protein (MCP) (Tar) (PDB:1QU7)	1	1	1	1008	9397	1008	5890		1733	1733	1733					male_bins_95_identity___1606
group_1019	COG1453	Predicted oxidoreductase of the aldo/keto reductase family	1	1	1	1354	3	1354	3		575	575	575	male_bins_95_identity___6246
group_10190	COG2182	Maltose-binding periplasmic protein MalE (MalE) (PDB:1T0K)	1	1	1	1008	9398	1008	5889		1280	1280	1280					male_bins_95_identity___1607
group_10191	COG1541	Phenylacetate-coenzyme A ligase PaaK	1	1	1	1008	9399	1008	5888		1292	1292	1292					male_bins_95_identity___1608
group_10192	COG2199	GGDEF domain	1	1	1	1008	9400	1008	5887		1622	1622	1622					male_bins_95_identity___1609
group_10193			1	1	1	1008	9401	1008	5886		755	755	755					male_bins_95_identity___1610
group_10194			1	1	1	1008	9422	1008	5861		833	833	833					male_bins_95_identity___1612
group_10195			1	1	1	1008	9423	1008	5860		461	461	461					male_bins_95_identity___1613
group_10196			1	1	1	1008	9424	1008	5859		491	491	491					male_bins_95_identity___1614
COG1423		ATP-dependent RNA circularization protein	1	1	1	1008	9425	1008	5858		1163	1163	1163					male_bins_95_identity___1615
group_10198	COG0394	Protein-tyrosine-phosphatase (Wzb) (PDB:4D74) (PUBMED:26641313)	1	1	1	1008	9426	1008	5857		461	461	461					male_bins_95_identity___1616
group_10199			1	1	1	1008	9427	1008	5856		1106	1106	1106					male_bins_95_identity___1617
group_1020	COG1132	ABC-type multidrug transport system	1	1	1	1354	2	1354	2		1817	1817	1817	male_bins_95_identity___6247
group_10200	COG0065	Homoaconitase/3-isopropylmalate dehydratase large subunit (LeuC) (PDB:4KP1)	1	1	1	1008	9428	1008	5855		1241	1241	1241					male_bins_95_identity___1618
group_10201	COG0066	3-isopropylmalate dehydratase small subunit (LeuD) (PDB:3Q3W)	1	1	1	1008	9429	1008	5854		503	503	503					male_bins_95_identity___1619
group_10202	COG0065	Homoaconitase/3-isopropylmalate dehydratase large subunit (LeuC) (PDB:4KP1)	1	1	1	1008	9430	1008	5853		1247	1247	1247					male_bins_95_identity___1620
group_10203	COG0066	3-isopropylmalate dehydratase small subunit (LeuD) (PDB:3Q3W)	1	1	1	1008	9431	1008	5852		503	503	503					male_bins_95_identity___1621
group_10204			1	1	1	1008	9432	1008	5851		731	731	731					male_bins_95_identity___1622
group_10205	COG0557	Exoribonuclease R (VacB) (PDB:6H25)	1	1	1	1008	1086	1008	5844		2144	2144	2144					male_bins_95_identity___1625
group_10206	COG1314	Protein translocase subunit SecG (SecG) (PDB:2AKH)	1	1	1	1008	1085	1008	5843		236	236	236					male_bins_95_identity___1626
COG0639		Diadenosine tetraphosphatase ApaH/serine/threonine protein phosphatase	1	1	1	1008	1084	1008	5842		797	797	797					male_bins_95_identity___1627
group_10208	COG3533	Beta-L-arabinofuranosidase	1	1	1	1008	1083	1008	5841		2138	2138	2138					male_bins_95_identity___1628
group_10209	COG0809	S-adenosylmethionine:tRNA-ribosyltransferase-isomerase (queuine synthetase) (QueA) (PDB:1VKY)	1	1	1	1008	1082	1008	5840		1034	1034	1034					male_bins_95_identity___1629
group_1021	COG1132	ABC-type multidrug transport system	1	1	1	1354	1	1354	1		1280	1280	1280	male_bins_95_identity___6248
group_10210	COG0072	Phenylalanyl-tRNA synthetase beta subunit (PheT) (PDB:3L4G)	1	1	1	1008	1081	1008	5839		2420	2420	2420					male_bins_95_identity___1630
group_10211	COG0016	Phenylalanyl-tRNA synthetase alpha subunit (PheS) (PDB:3L4G)	1	1	1	1008	1080	1008	5838		1019	1019	1019					male_bins_95_identity___1631
group_10212	COG2703	Hemerythrin (PDB:1A7D)	1	1	1	1008	1079	1008	5837		878	878	878					male_bins_95_identity___1632
group_10213	COG3153	Predicted N-acetyltransferase YhbS (yhbS) (PDB:4ZBG)	1	1	1	1008	1078	1008	5836		455	455	455					male_bins_95_identity___1633
group_10214	COG1670	Protein N-acetyltransferase	1	1	1	1008	1077	1008	5835		557	557	557					male_bins_95_identity___1634
group_10215			1	1	1	1008	1076	1008	5834		1151	1151	1151					male_bins_95_identity___1635
group_10216			1	1	1	1008	1075	1008	5833		776	776	776					male_bins_95_identity___1636
group_10217			1	1	1	1008	1074	1008	5832		830	830	830					male_bins_95_identity___1637
group_10218	COG1132	ABC-type multidrug transport system	1	1	1	1008	1073	1008	5831		515	515	515					male_bins_95_identity___1638
group_10219	COG1132	ABC-type multidrug transport system	1	1	1	1008	1072	1008	5830		665	665	665					male_bins_95_identity___1639
group_1022	COG0532	Translation initiation factor IF-2	1	1	1	1340	68	1339	1		1133	1133	1133	male_bins_95_identity___6249
group_10220	COG0346	Catechol 2	1	1	1	1008	1071	1008	5829		89	89	89					male_bins_95_identity___1640
group_10221	COG2184	Fido	1	1	1	1008	1070	1008	5828		167	167	167					male_bins_95_identity___1641
group_10222	COG2184	Fido	1	1	1	1008	1069	1008	5827		440	440	440					male_bins_95_identity___1642
group_10223	COG2378	Predicted DNA-binding transcriptional regulator YobV	1	1	1	1008	1068	1008	5826		908	908	908					male_bins_95_identity___1643
group_10224	COG1501	Alpha-glucosidase/xylosidase	1	1	1	1008	1067	1008	5825		2339	2339	2339					male_bins_95_identity___1644
group_10225	COG1164	Oligoendopeptidase F (PepF) (PDB:3CE2)	1	1	1	1008	1066	1008	5824		1703	1703	1703					male_bins_95_identity___1645
group_10226	COG1284	Uncharacterized membrane-anchored protein YitT	1	1	1	1008	1065	1008	5823		860	860	860					male_bins_95_identity___1646
group_10227	COG1554	Kojibiose phosphorylase YcjT (ATH1) (PDB:1H54) (PUBMED:29684280)	1	1	1	1008	1064	1008	5822		2300	2300	2300					male_bins_95_identity___1647
group_10228	COG1472	Periplasmic beta-glucosidase and related glycosidases (BglX) (PDB:2X40)	1	1	1	1008	1063	1008	5821		2780	2780	2780					male_bins_95_identity___1648
group_10229	COG1609	DNA-binding transcriptional regulator	1	1	1	1008	1062	1008	5820		1004	1004	1004					male_bins_95_identity___1649
group_1023	COG1358	Ribosomal protein L7Ae or related RNA K-turn-binding protein (Rpl7Ae) (PDB:4LCK)	1	1	1	1340	69	1339	2		359	359	359	male_bins_95_identity___6250
group_10230			1	1	1	1008	1061	1008	5819		134	134	134					male_bins_95_identity___1650
group_10231			1	1	1	1008	1060	1008	5818		359	359	359					male_bins_95_identity___1651
group_10232			1	1	1	1008	1059	1008	5817		257	257	257					male_bins_95_identity___1652
group_10233			1	1	1	1008	1058	1008	5816		95	95	95					male_bins_95_identity___1653
group_10234	COG1396	Transcriptional regulator	1	1	1	1008	1057	1008	5815		368	368	368					male_bins_95_identity___1654
group_10235	COG0596	2-succinyl-6-hydroxy-2	1	1	1	1008	1056	1008	5814		806	806	806					male_bins_95_identity___1655
group_10236			1	1	1	1008	1055	1008	5813		188	188	188					male_bins_95_identity___1656
group_10237			1	1	1	1008	1054	1008	5812		512	512	512					male_bins_95_identity___1657
group_10238	COG0507	ATPase/5-3 helicase helicase subunit RecD of the DNA repair enzyme RecBCD (exonuclease V) (RecD) (PDB:1W36) (PUBMED:29901759	1	1	1	1008	1043	1008	5801		458	458	458					male_bins_95_identity___1660
group_10239	COG0507	ATPase/5-3 helicase helicase subunit RecD of the DNA repair enzyme RecBCD (exonuclease V) (RecD) (PDB:1W36) (PUBMED:29901759	1	1	1	1008	1042	1008	5800		380	380	380					male_bins_95_identity___1661
group_1024	COG2740	Nucleoid-associated protein YlxR	1	1	1	1340	70	1339	3		272	272	272	male_bins_95_identity___6251
group_10240	COG1595	DNA-directed RNA polymerase specialized sigma subunit	1	1	1	1008	1041	1008	5799		560	560	560					male_bins_95_identity___1662
group_10241			1	1	1	1008	1039	1008	5797		713	713	713					male_bins_95_identity___1664
group_10242			1	1	1	1008	1038	1008	5796		257	257	257					male_bins_95_identity___1665
group_10243			1	1	1	1008	1037	1008	5795		263	263	263					male_bins_95_identity___1666
group_10244	COG3267	Type II secretory pathway ATPase component GspA/ExeA/MshM (ExeA) (PUBMED:21378198)	1	1	1	1008	1035	1008	5793		245	245	245					male_bins_95_identity___1668
group_10245			1	1	1	1008	1034	1008	5792		971	971	971					male_bins_95_identity___1669
group_10246	COG0860	N-acetylmuramoyl-L-alanine amidase (AmiC) (PDB:1JWQ)	1	1	1	1008	1033	1008	5791		809	809	809					male_bins_95_identity___1670
group_10247			1	1	1	1008	1032	1008	5790		230	230	230					male_bins_95_identity___1671
group_10248	COG1131	ABC-type multidrug transport system	1	1	1	1008	1027	1008	5784		890	890	890					male_bins_95_identity___1674
group_10249			1	1	1	1008	1026	1008	5783		1232	1232	1232					male_bins_95_identity___1675
group_1025	COG0195	Transcription antitermination factor NusA	1	1	1	1340	71	1339	4		1277	1277	1277	male_bins_95_identity___6252
group_10250	COG0480	Translation elongation factor EF-G	1	1	1	1802	1	1802	2		1919	1919	1919					male_bins_95_identity___1676
group_10251			1	1	1	1802	2	1802	3		173	173	173					male_bins_95_identity___1677
group_10252	COG1191	DNA-directed RNA polymerase specialized sigma subunit (FliA) (PDB:1RP3)	1	1	1	1802	5	1802	4		512	512	512					male_bins_95_identity___1678
group_10253			1	1	1	1802	4	1802	5		425	425	425					male_bins_95_identity___1679
group_10254			1	1	1	1802	3	1802	1		80	80	80					male_bins_95_identity___1680
group_10255	COG0675	Transposase (InsQ)	1	1	1	1008	3498	1008	2738		1103	1103	1103					male_bins_95_identity___2594
group_10256	COG0675	Transposase (InsQ)	1	1	1	1008	1814	1008	1952		1103	1103	1103					male_bins_95_identity___18342
group_10257			1	1	1	1008	3499	1008	2739		713	713	713					male_bins_95_identity___2595
group_10258	COG3279	DNA-binding response regulator	1	1	1	1008	3500	1008	2740		461	461	461					male_bins_95_identity___2596
group_10259	COG0534	Na+-driven multidrug efflux pump	1	1	1	1008	3502	1008	2742		1391	1391	1391					male_bins_95_identity___2598
COG0779		Ribosome maturation factor RimP (RimP) (PDB:1IB8)	1	1	1	1340	72	1339	5		521	521	521	male_bins_95_identity___6253
group_10260	COG0527	Aspartate kinase (MetL1) (PDB:2CDQ)	1	1	1	1008	3503	1008	2743		1319	1319	1319					male_bins_95_identity___2599
group_10261	COG0460	Homoserine dehydrogenase (ThrA) (PDB:5AVO) (PUBMED:29124164)	1	1	1	1008	3504	1008	2744		1202	1202	1202					male_bins_95_identity___2600
group_10262	COG4492	ACT domain-containing protein	1	1	1	1008	3505	1008	2745		443	443	443					male_bins_95_identity___2601
group_10263			1	1	1	1008	3506	1008	2746		170	170	170					male_bins_95_identity___2602
group_10264	COG1787	Endonuclease	1	1	1	1008	3507	1008	2747		713	713	713					male_bins_95_identity___2603
group_10265			1	1	1	1008	3508	1008	2748		356	356	356					male_bins_95_identity___2604
group_10266			1	1	1	1008	3509	1008	2749		218	218	218					male_bins_95_identity___2605
group_10267			1	1	1	1008	3510	1008	2750		224	224	224					male_bins_95_identity___2606
group_10268	COG1595	DNA-directed RNA polymerase specialized sigma subunit	1	1	1	1008	3511	1008	2751		599	599	599					male_bins_95_identity___2607
group_10269			1	1	1	1008	3512	1008	2752		1085	1085	1085					male_bins_95_identity___2608
group_1027	COG1396	Transcriptional regulator	1	1	1	1340	73	1339	6		461	461	461	male_bins_95_identity___6254
group_10270			1	1	1	1008	3513	1008	2753		143	143	143					male_bins_95_identity___2609
group_10271	COG2814	Predicted arabinose efflux permease AraJ	1	1	1	1008	3514	1008	2754		1232	1232	1232					male_bins_95_identity___2610
group_10272	COG3212	PepSY domain containing protein	1	1	1	1008	3515	1008	2755		1103	1103	1103					male_bins_95_identity___2611
group_10273	COG0002	N-acetyl-gamma-glutamylphosphate reductase (ArgC) (PDB:3DR3)	1	1	1	1008	3516	1008	2756		944	944	944					male_bins_95_identity___2612
group_10274	COG0144	16S rRNA C967 or C1407 C5-methylase	1	1	1	1008	3517	1008	2757		1412	1412	1412					male_bins_95_identity___2613
group_10275	COG0534	Na+-driven multidrug efflux pump	1	1	1	1008	3518	1008	2758		1361	1361	1361					male_bins_95_identity___2614
group_10276	COG0534	Na+-driven multidrug efflux pump	1	1	1	1008	3519	1008	2759		1364	1364	1364					male_bins_95_identity___2615
group_10277	COG0286	Type I restriction-modification system	1	1	1	1008	3520	1008	2760		1520	1520	1520					male_bins_95_identity___2616
group_10278	COG1715	Restriction endonuclease Mrr (Mrr)	1	1	1	1008	3521	1008	2761		656	656	656					male_bins_95_identity___2617
group_10279	COG1396	Transcriptional regulator	1	1	1	1008	3522	1008	2762		248	248	248					male_bins_95_identity___2618
group_1028	COG0451	Nucleoside-diphosphate-sugar epimerase (WcaG) (PDB:2X4G)	1	1	1	1340	74	1339	7		944	944	944	male_bins_95_identity___6255
group_10280	COG2204	DNA-binding transcriptional response regulator	1	1	1	1008	3523	1008	2763		719	719	719					male_bins_95_identity___2619
group_10281	COG3290	Sensor histidine kinase DipB regulating citrate/malate metabolism (CitA)	1	1	1	1008	3524	1008	2764		1295	1295	1295					male_bins_95_identity___2620
group_10282			1	1	1	1008	3525	1008	2765		161	161	161					male_bins_95_identity___2621
group_10283			1	1	1	1008	3526	1008	2766		563	563	563					male_bins_95_identity___2622
group_10284			1	1	1	1008	3527	1008	2767		251	251	251					male_bins_95_identity___2623
COG5834		Stage V sporulation protein SpoVAA	1	1	1	1008	3528	1008	2768		644	644	644					male_bins_95_identity___2624
group_10286	COG5835	Stage V sporulation protein SpoVAB	1	1	1	1008	3529	1008	2769		449	449	449					male_bins_95_identity___2625
group_10287	COG5836	Stage V sporulation protein SpoVAC	1	1	1	1008	3530	1008	2770		461	461	461					male_bins_95_identity___2626
group_10288	COG0366	Glycosidase/amylase (phosphorylase) (AmyA) (PDB:2P67) (PUBMED:29684280)	1	1	1	1008	3531	1008	2771		1706	1706	1706					male_bins_95_identity___2627
group_10289			1	1	1	1008	3532	1008	2772		1838	1838	1838					male_bins_95_identity___2628
group_1029			1	1	1	1340	75	1339	82		251	251	251	male_bins_95_identity___6256
group_10290	COG0642	Signal transduction histidine kinase (BaeS) (PDB:1JOY)	1	1	1	1008	3533	1008	2773		1862	1862	1862					male_bins_95_identity___2629
group_10291	COG1595	DNA-directed RNA polymerase specialized sigma subunit	1	1	1	1008	3534	1008	2774		470	470	470					male_bins_95_identity___2630
group_10292			1	1	1	1008	3535	1008	2775		1493	1493	1493					male_bins_95_identity___2631
group_10293	COG3640	CO dehydrogenase nickel-insertion accessory protein CooC1 (CooC) (PUBMED:15466042)	1	1	1	1008	3536	1008	2776		779	779	779					male_bins_95_identity___2632
group_10294	COG1775	Benzoyl-CoA reductase/2-hydroxyglutaryl-CoA dehydratase subunit	1	1	1	1008	3537	1008	2777		1169	1169	1169					male_bins_95_identity___2633
group_10295	COG1775	Benzoyl-CoA reductase/2-hydroxyglutaryl-CoA dehydratase subunit	1	1	1	1008	3538	1008	2778		1574	1574	1574					male_bins_95_identity___2634
group_10296	COG1924	Activator of 2-hydroxyglutaryl-CoA dehydratase (HSP70-class ATPase domain) (YjiL) (PDB:1HUX)	1	1	1	1008	3539	1008	2779		809	809	809					male_bins_95_identity___2635
group_10297			1	1	1	1008	3540	1008	2780		164	164	164					male_bins_95_identity___2636
group_10298	COG1614	CO dehydrogenase/acetyl-CoA synthase beta subunit (CdhC)	1	1	1	1008	3541	1008	2781		722	722	722					male_bins_95_identity___2637
group_10299			1	1	1	1008	3542	1008	2782		851	851	851					male_bins_95_identity___2638
group_1030	COG4219	Signal transducer regulating beta-lactamase production	1	1	1	1340	76	1339	81		1304	1304	1304	male_bins_95_identity___6257
group_10300	COG1102	Cytidylate kinase (CmkB)	1	1	1	1008	3543	1008	2783		599	599	599					male_bins_95_identity___2639
group_10301	COG1420	Transcriptional regulator of heat shock response (HrcA) (PDB:1STZ)	1	1	1	1008	3544	1008	2784		1085	1085	1085					male_bins_95_identity___2640
group_10302	COG0576	Molecular chaperone GrpE (heat shock protein HSP-70) (GrpE) (PDB:1DKG)	1	1	1	1008	3545	1008	2785		641	641	641					male_bins_95_identity___2641
group_10303	COG0484	DnaJ-class molecular chaperone with C-terminal Zn finger domain (DnaJ) (PDB:1BQ0)	1	1	1	1008	3558	1008	2737		1172	1172	1172					male_bins_95_identity___2643
group_10304	COG2304	Secreted protein containing bacterial Ig-like domain and vWFA domain (YfbK)	1	1	1	1008	3557	1008	2736		2195	2195	2195					male_bins_95_identity___2644
group_10305			1	1	1	1008	3556	1008	2735		881	881	881					male_bins_95_identity___2645
group_10306	COG2264	Ribosomal protein L11 methylase PrmA (PrmA) (PDB:3GRZ)	1	1	1	1008	3555	1008	2734		962	962	962					male_bins_95_identity___2646
group_10307	COG2820	Uridine phosphorylase (Udp) (PDB:1K3F)	1	1	1	1008	3554	1008	2733		776	776	776					male_bins_95_identity___2647
group_10308	COG1385	16S rRNA U1498 N3-methylase RsmE (RsmE) (PDB:1NXZ)	1	1	1	1008	3553	1008	2732		758	758	758					male_bins_95_identity___2648
group_10309	COG1104	Cysteine desulfurase/Cysteine sulfinate desulfinase IscS or related enzyme	1	1	1	1008	3552	1008	2731		1157	1157	1157					male_bins_95_identity___2649
group_1031	COG3682	Transcriptional regulator	1	1	1	1340	77	1339	80		359	359	359	male_bins_95_identity___6258
group_10310	COG0301	Adenylyl- and sulfurtransferase ThiI (thiamine and tRNA 4-thiouridine biosynthesis) (ThiI) (PDB:1VBK) (PUBMED:22773787)	1	1	1	1008	3551	1008	2730		1184	1184	1184					male_bins_95_identity___2650
group_10311	COG1925	HPr or related phosphotransfer protein (PtsH) (PDB:1CM2)	1	1	1	1008	3550	1008	2729		233	233	233					male_bins_95_identity___2651
group_10312	COG0621	tRNA A37 methylthiotransferase MiaB (MiaB) (PDB:4JC0) (PUBMED:17407324	1	1	1	1008	3549	1008	2728		1286	1286	1286					male_bins_95_identity___2652
group_10313	COG4472	Uncharacterized conserved protein	1	1	1	1008	3548	1008	2727		287	287	287					male_bins_95_identity___2653
group_10314	COG0816	YqgF/RuvX protein	1	1	1	1008	3547	1008	2725		440	440	440					male_bins_95_identity___2654
group_10315			1	1	1	1008	3546	1008	2726		263	263	263					male_bins_95_identity___2655
group_10316	COG1559	Endolytic transglycosylase MltG	1	1	1	1008	2129	1008	5276		386	386	386					male_bins_95_identity___2657
COG4122		tRNA 5-hydroxyU34 O-methylase TrmR/YrrM (TrmR) (PDB:1H1D) (PUBMED:29982645)	1	1	1	1008	2130	1008	5275		680	680	680					male_bins_95_identity___2658
group_10318	COG0826	23S rRNA C2501 and tRNA U34 5'-hydroxylation protein RlhA/YrrN/YrrO	1	1	1	1008	2131	1008	5274		1244	1244	1244					male_bins_95_identity___2659
group_10319	COG0286	Type I restriction-modification system	1	1	1	1008	2132	1008	5273		1571	1571	1571					male_bins_95_identity___2660
group_1032	COG0577	ABC-type antimicrobial peptide transport system	1	1	1	1340	78	1339	79		2039	2039	2039	male_bins_95_identity___6259
group_10320	COG0732	Restriction endonuclease S subunit (HsdS) (PDB:1YDX)	1	1	1	1008	2133	1008	5272		1169	1169	1169					male_bins_95_identity___2661
group_10321			1	1	1	1008	2134	1008	5271		887	887	887					male_bins_95_identity___2662
group_10322	COG0610	Type I site-specific restriction-modification system	1	1	1	1008	2135	1008	5270		3143	3143	3143					male_bins_95_identity___2663
group_10323			1	1	1	1008	2136	1008	5269		200	200	200					male_bins_95_identity___2664
group_10324	COG1349	DNA-binding transcriptional regulator of sugar metabolism	1	1	1	1008	2137	1008	5268		761	761	761					male_bins_95_identity___2665
group_10325	COG2213	Phosphotransferase system	1	1	1	1008	2138	1008	5267		1865	1865	1865					male_bins_95_identity___2666
group_10326	COG1105	1-phosphofructokinase or 6-phosphofructokinase II (FruK) (PDB:2ABQ)	1	1	1	1008	2157	1008	5235		908	908	908					male_bins_95_identity___2668
group_10327	COG1925	HPr or related phosphotransfer protein (PtsH) (PDB:1CM2)	1	1	1	1008	2158	1008	5234		257	257	257					male_bins_95_identity___2669
COG1080		Phosphoenolpyruvate-protein kinase (PTS system EI component in bacteria) (PtsA) (PDB:1EZA)	1	1	1	1008	2159	1008	5233		1634	1634	1634					male_bins_95_identity___2670
group_10329	COG1131	ABC-type multidrug transport system	1	1	1	1008	3497	1008	2724		911	911	911					male_bins_95_identity___2672
group_1033	COG1136	ABC-type lipoprotein export system	1	1	1	1340	79	1339	78		836	836	836	male_bins_95_identity___6260
group_10330	COG0842	ABC-type multidrug transport system	1	1	1	1008	3496	1008	2723		926	926	926					male_bins_95_identity___2673
group_10331	COG3279	DNA-binding response regulator	1	1	1	1008	3495	1008	2787		437	437	437					male_bins_95_identity___2674
group_10332			1	1	1	1008	3494	1008	2788		434	434	434					male_bins_95_identity___2675
group_10333	COG0569	Trk/Ktr K+ transport system regulatory component TrkA/KtrA/KtrC	1	1	1	1008	3493	1008	2789		1586	1586	1586					male_bins_95_identity___2676
COG3878		Uncharacterized conserved protein YwqG	1	1	1	1008	3492	1008	2790		923	923	923					male_bins_95_identity___2677
group_10335	COG0789	DNA-binding transcriptional regulator	1	1	1	1008	3491	1008	2791		740	740	740					male_bins_95_identity___2678
group_10336	COG1961	Site-specific DNA recombinase SpoIVCA/DNA invertase PinE (SpoIVCA) (PDB:1GDT)	1	1	1	1008	3490	1008	2792		635	635	635					male_bins_95_identity___2679
group_10337			1	1	1	1008	3489	1008	2793		1433	1433	1433					male_bins_95_identity___2680
group_10338	COG1887	CDP-glycerol glycerophosphotransferase	1	1	1	1008	3488	1008	2794		2447	2447	2447					male_bins_95_identity___2681
COG1020		EntF	1	1	1	1008	3487	1008	2795		1505	1505	1505					male_bins_95_identity___2682
group_1034	COG0642	Signal transduction histidine kinase (BaeS) (PDB:1JOY)	1	1	1	1340	80	1339	77		1097	1097	1097	male_bins_95_identity___6261
group_10340	COG1020	EntF	1	1	1	1008	3486	1008	2796		632	632	632					male_bins_95_identity___2683
group_10341	COG1020	EntF	1	1	1	1008	3485	1008	2797		431	431	431					male_bins_95_identity___2684
group_10342			1	1	1	1008	3484	1008	2798		227	227	227					male_bins_95_identity___2685
group_10343			1	1	1	1008	3483	1008	2799		1250	1250	1250					male_bins_95_identity___2686
group_10344			1	1	1	1008	3482	1008	2800		1115	1115	1115					male_bins_95_identity___2687
group_10345			1	1	1	1008	3481	1008	2801		485	485	485					male_bins_95_identity___2688
COG1083		CMP-N-acetylneuraminic acid synthetase	1	1	1	1008	3480	1008	2802		668	668	668					male_bins_95_identity___2689
group_10347	COG0119	Isopropylmalate/homocitrate/citramalate synthases (LeuA) (PDB:4JN6)	1	1	1	1008	3479	1008	2803		1034	1034	1034					male_bins_95_identity___2690
group_10348	COG0028	Acetolactate synthase large subunit or other thiamine pyrophosphate-requiring enzyme (IlvB) (PDB:1BFD)	1	1	1	1008	3478	1008	2804		530	530	530					male_bins_95_identity___2691
group_10349	COG0028	Acetolactate synthase large subunit or other thiamine pyrophosphate-requiring enzyme (IlvB) (PDB:1BFD)	1	1	1	1008	3477	1008	2805		1112	1112	1112					male_bins_95_identity___2692
group_1035	COG0745	DNA-binding response regulator	1	1	1	1340	81	1339	76		674	674	674	male_bins_95_identity___6262
group_10350	COG1778	3-deoxy-D-manno-octulosonate 8-phosphate phosphatase KdsC and related HAD superfamily phosphatases (KdsC) (PDB:3I6B)	1	1	1	1008	3476	1008	2806		491	491	491					male_bins_95_identity___2693
group_10351			1	1	1	1008	3475	1008	2807		1718	1718	1718					male_bins_95_identity___2694
group_10352	COG0463	Glycosyltransferase involved in cell wall bisynthesis (WcaA) (PDB:5MLZ)	1	1	1	1008	3474	1008	2808		1295	1295	1295					male_bins_95_identity___2695
group_10353	COG0438	Glycosyltransferase involved in cell wall bisynthesis (RfaB) (PDB:2IV7)	1	1	1	1008	3473	1008	2809		1361	1361	1361					male_bins_95_identity___2696
group_10354	COG2226	Ubiquinone/menaquinone biosynthesis C-methylase UbiE/MenG (UbiE) (PDB:4OBW)	1	1	1	1008	3472	1008	2810		953	953	953					male_bins_95_identity___2697
group_10355	COG3754	Lipopolysaccharide biosynthesis protein (RgpF)	1	1	1	1008	3471	1008	2811		1154	1154	1154					male_bins_95_identity___2698
group_10356	COG0535	Radical SAM superfamily maturase	1	1	1	1008	3470	1008	2812		407	407	407					male_bins_95_identity___2699
group_10357	COG3754	Lipopolysaccharide biosynthesis protein (RgpF)	1	1	1	1008	3469	1008	2813		1073	1073	1073					male_bins_95_identity___2700
group_10358	COG1442	Lipopolysaccharide biosynthesis protein	1	1	1	1008	3468	1008	2814		1232	1232	1232					male_bins_95_identity___2701
group_10359	COG0438	Glycosyltransferase involved in cell wall bisynthesis (RfaB) (PDB:2IV7)	1	1	1	1008	3467	1008	2815		1109	1109	1109					male_bins_95_identity___2702
group_1036	COG1132	ABC-type multidrug transport system	1	1	1	1340	82	1339	75		1760	1760	1760	male_bins_95_identity___6263
group_10360	COG0463	Glycosyltransferase involved in cell wall bisynthesis (WcaA) (PDB:5MLZ)	1	1	1	1008	3466	1008	2816		1085	1085	1085					male_bins_95_identity___2703
group_10361	COG0036	Pentose-5-phosphate-3-epimerase (Rpe) (PDB:1H1Y)	1	1	1	1008	3465	1008	2817		683	683	683					male_bins_95_identity___2704
group_10362	COG1211	2-C-methyl-D-erythritol 4-phosphate cytidylyltransferase (IspD) (PDB:1H3M)	1	1	1	1008	3464	1008	2818		710	710	710					male_bins_95_identity___2705
group_10363			1	1	1	1008	3463	1008	2819		710	710	710					male_bins_95_identity___2706
group_10364			1	1	1	1008	3462	1008	2820		242	242	242					male_bins_95_identity___2707
group_10365	COG1952	Preprotein translocase subunit SecB (SecB) (PDB:1OZB)	1	1	1	1008	3461	1008	2821		404	404	404					male_bins_95_identity___2708
group_10366	COG1028	NAD(P)-dependent dehydrogenase	1	1	1	1008	3460	1008	2822		896	896	896					male_bins_95_identity___2709
group_10367			1	1	1	1008	3459	1008	2823		638	638	638					male_bins_95_identity___2710
group_10368	COG1396	Transcriptional regulator	1	1	1	1008	3458	1008	2824		326	326	326					male_bins_95_identity___2711
group_10369	COG1670	Protein N-acetyltransferase	1	1	1	1008	3457	1008	2825		728	728	728					male_bins_95_identity___2712
group_1037	COG1418	HD superfamily phosphodieaserase	1	1	1	1340	67	1339	74		665	665	665	male_bins_95_identity___6264
group_10370	COG0004	Ammonia channel protein AmtB (AmtB) (PDB:1U77)	1	1	1	1008	3456	1008	2826		1796	1796	1796					male_bins_95_identity___2713
group_10371	COG2206	HD-GYP domain	1	1	1	1008	3455	1008	2827		1175	1175	1175					male_bins_95_identity___2714
group_10372	COG0494	8-oxo-dGTP pyrophosphatase MutT and related house-cleaning NTP pyrophosphohydrolases	1	1	1	1008	3454	1008	2828		614	614	614					male_bins_95_identity___2715
group_10373	COG1609	DNA-binding transcriptional regulator	1	1	1	1008	3453	1008	2829		1013	1013	1013					male_bins_95_identity___2716
group_10374	COG1307	Fatty acid-binding protein DegV (function unknown) (DegV) (PDB:1MGP)	1	1	1	1008	3452	1008	2830		899	899	899					male_bins_95_identity___2717
group_10375	COG2017	Galactose mutarotase or related enzyme (GalM) (PDB:1LUR)	1	1	1	1008	3451	1008	2831		875	875	875					male_bins_95_identity___2718
group_10376	COG0840	Methyl-accepting chemotaxis protein (MCP) (Tar) (PDB:1QU7)	1	1	1	1008	3450	1008	2832		2426	2426	2426					male_bins_95_identity___2719
group_10377	COG3345	Alpha-galactosidase (GalA) (PDB:2XN0)	1	1	1	1008	3449	1008	2833		2207	2207	2207					male_bins_95_identity___2720
group_10378	COG1609	DNA-binding transcriptional regulator	1	1	1	1008	3448	1008	2834		1022	1022	1022					male_bins_95_identity___2721
group_10379	COG2207	AraC-type DNA-binding domain and AraC-containing proteins (AraC) (PDB:1BL0)	1	1	1	1008	3447	1008	2835		920	920	920					male_bins_95_identity___2722
group_1038	COG1032	Radical SAM superfamily enzyme YgiQ	1	1	1	1340	66	1339	73		1838	1838	1838	male_bins_95_identity___6265
group_10380	COG1653	ABC-type glycerol-3-phosphate transport system	1	1	1	1008	3446	1008	2836		1451	1451	1451					male_bins_95_identity___2723
group_10381	COG0395	ABC-type glycerol-3-phosphate transport system	1	1	1	1008	3388	1008	2846		854	854	854					male_bins_95_identity___2725
group_10382	COG2942	Mannose or cellobiose epimerase	1	1	1	1008	3387	1008	2845		1196	1196	1196					male_bins_95_identity___2726
group_10383	COG2152	Predicted glycosyl hydrolase	1	1	1	1008	3386	1008	2844		1181	1181	1181					male_bins_95_identity___2727
group_10384	COG2755	Lysophospholipase L1 or related esterase. Includes spore coat protein LipC/YcsK (TesA) (PDB:1BWP)	1	1	1	1008	3385	1008	2843		1151	1151	1151					male_bins_95_identity___2728
group_10385	COG2152	Predicted glycosyl hydrolase	1	1	1	1008	3384	1008	2842		1034	1034	1034					male_bins_95_identity___2729
group_10386	COG2755	Lysophospholipase L1 or related esterase. Includes spore coat protein LipC/YcsK (TesA) (PDB:1BWP)	1	1	1	1008	3383	1008	2841		1106	1106	1106					male_bins_95_identity___2730
group_10387			1	1	1	1008	3382	1008	2840		341	341	341					male_bins_95_identity___2731
group_10388	COG1879	ABC-type sugar transport system	1	1	1	1008	3381	1008	2839		566	566	566					male_bins_95_identity___2732
group_10389	COG0840	Methyl-accepting chemotaxis protein (MCP) (Tar) (PDB:1QU7)	1	1	1	1008	3380	1008	2838		1703	1703	1703					male_bins_95_identity___2733
group_1039	COG3663	G:T/U-mismatch repair DNA glycosylase (Mug) (PDB:1MTL)	1	1	1	1340	65	1339	72		491	491	491	male_bins_95_identity___6266
group_10390	COG1482	Mannose-6-phosphate isomerase	1	1	1	1008	3379	1008	2837		938	938	938					male_bins_95_identity___2734
group_10391	COG0504	CTP synthase (UTP-ammonia lyase) (PyrG) (PDB:1S1M)	1	1	1	1008	3371	1008	4033		1604	1604	1604					male_bins_95_identity___2736
group_10392	COG0465	ATP-dependent Zn proteases (HflB) (PDB:1LV7)	1	1	1	1008	3370	1008	4032		2492	2492	2492					male_bins_95_identity___2737
group_10393	COG0322	Excinuclease UvrABC	1	1	1	1008	3369	1008	4031		1907	1907	1907					male_bins_95_identity___2738
group_10394	COG1609	DNA-binding transcriptional regulator	1	1	1	1008	3368	1008	4030		1094	1094	1094					male_bins_95_identity___2739
group_10395			1	1	1	1008	3367	1008	4029		1049	1049	1049					male_bins_95_identity___2740
group_10396	COG1132	ABC-type multidrug transport system	1	1	1	1008	3366	1008	4028		1790	1790	1790					male_bins_95_identity___2741
group_10397			1	1	1	1008	3365	1008	4027		233	233	233					male_bins_95_identity___2742
group_10398			1	1	1	1008	3364	1008	4026		92	92	92					male_bins_95_identity___2743
group_10399			1	1	1	1008	3363	1008	4025		272	272	272					male_bins_95_identity___2744
group_1040			1	1	1	1340	64	1339	71		464	464	464	male_bins_95_identity___6267
group_10400	COG0535	Radical SAM superfamily maturase	1	1	1	1008	3362	1008	4024		1058	1058	1058					male_bins_95_identity___2745
group_10401	COG2274	ABC-type bacteriocin/lantibiotic exporters	1	1	1	1008	3361	1008	4023		1784	1784	1784					male_bins_95_identity___2746
group_10402	COG2274	ABC-type bacteriocin/lantibiotic exporters	1	1	1	1008	3360	1008	4022		1829	1829	1829					male_bins_95_identity___2747
group_10403			1	1	1	1008	3359	1008	4021		260	260	260					male_bins_95_identity___2748
group_10404	COG2274	ABC-type bacteriocin/lantibiotic exporters	1	1	1	1008	3358	1008	4020		1049	1049	1049					male_bins_95_identity___2749
COG4987		ABC-type transport system involved in cytochrome bd biosynthesis	1	1	1	1008	3357	1008	4019		263	263	263					male_bins_95_identity___2750
group_10406	COG1132	ABC-type multidrug transport system	1	1	1	1008	3356	1008	4018		1739	1739	1739					male_bins_95_identity___2751
group_10407			1	1	1	1008	3355	1008	4017		170	170	170					male_bins_95_identity___2752
group_10408			1	1	1	1008	3354	1008	4016		434	434	434					male_bins_95_identity___2753
group_10409	COG1126	ABC-type polar amino acid transport system	1	1	1	1008	3353	1008	4015		797	797	797					male_bins_95_identity___2754
group_1041	COG1011	FMN and 5-amino-6-(5-phospho-D-ribitylamino)uracil phosphatase YigB	1	1	1	1340	63	1339	70		455	455	455	male_bins_95_identity___6268
group_10410	COG0765	ABC-type amino acid transport system	1	1	1	1008	3352	1008	4014		686	686	686					male_bins_95_identity___2755
group_10411	COG0834	ABC-type amino acid transport/signal transduction system	1	1	1	1008	3351	1008	4013		938	938	938					male_bins_95_identity___2756
group_10412			1	1	1	1008	3350	1008	4012		107	107	107					male_bins_95_identity___2757
group_10413			1	1	1	1008	3349	1008	4011		347	347	347					male_bins_95_identity___2758
group_10414	COG3878	Uncharacterized conserved protein YwqG	1	1	1	1008	3348	1008	4010		263	263	263					male_bins_95_identity___2759
group_10415			1	1	1	1008	3347	1008	4009		524	524	524					male_bins_95_identity___2760
group_10416			1	1	1	1008	3346	1008	4008		437	437	437					male_bins_95_identity___2761
group_10417	COG0747	ABC-type transport system	1	1	1	1008	3345	1008	4007		1616	1616	1616					male_bins_95_identity___2762
group_10418	COG0601	ABC-type dipeptide/oligopeptide/nickel transport system	1	1	1	1008	3344	1008	4006		989	989	989					male_bins_95_identity___2763
group_10419	COG3250	Beta-galactosidase/beta-glucuronidase (LacZ) (PDB:5N6U) (PUBMED:19291314)	1	1	1	1008	2200	1008	4909		2267	2267	2267					male_bins_95_identity___2764
group_1042	COG2059	Chromate transport protein ChrA (ChrA)	1	1	1	1340	62	1339	69		545	545	545	male_bins_95_identity___6269
group_10420	COG2211	Na+/melibiose symporter or related transporter (MelB) (PDB:4M64)	1	1	1	1008	2201	1008	4910		1391	1391	1391					male_bins_95_identity___2765
group_10421	COG0546	Phosphoglycolate phosphatase	1	1	1	1008	2202	1008	4911		860	860	860					male_bins_95_identity___2766
group_10422	COG1404	Serine protease	1	1	1	1008	2197	1008	4899		1721	1721	1721					male_bins_95_identity___2770
COG0071		Small heat shock protein IbpA	1	1	1	1008	2196	1008	4898		458	458	458					male_bins_95_identity___2771
group_10424	COG1917	Cupin domain protein related to quercetin dioxygenase (QdoI) (PDB:2H0V)	1	1	1	1008	2195	1008	4897		464	464	464					male_bins_95_identity___2772
group_10425	COG2211	Na+/melibiose symporter or related transporter (MelB) (PDB:4M64)	1	1	1	1008	2194	1008	4896		605	605	605					male_bins_95_identity___2773
group_10426	COG2730	Aryl-phospho-beta-D-glucosidase BglC	1	1	1	1008	2193	1008	4895		1190	1190	1190					male_bins_95_identity___2774
group_10427	COG3507	Beta-xylosidase (XynB2) (PDB:1Y7B)	1	1	1	1008	2192	1008	4894		1574	1574	1574					male_bins_95_identity___2775
group_10428			1	1	1	1008	2191	1008	4893		1070	1070	1070					male_bins_95_identity___2776
group_10429	COG0784	CheY-like REC (receiver) domain	1	1	1	1008	2190	1008	4892		1448	1448	1448					male_bins_95_identity___2777
group_1043	COG2059	Chromate transport protein ChrA (ChrA)	1	1	1	1340	61	1339	68		569	569	569	male_bins_95_identity___6270
group_10430	COG0513	Superfamily II DNA and RNA helicase (SrmB) (PDB:3RRM)	1	1	1	1008	2189	1008	4891		1601	1601	1601					male_bins_95_identity___2778
group_10431	COG4219	Signal transducer regulating beta-lactamase production	1	1	1	1008	2188	1008	4890		2093	2093	2093					male_bins_95_identity___2779
group_10432	COG3682	Transcriptional regulator	1	1	1	1008	2187	1008	4889		371	371	371					male_bins_95_identity___2780
group_10433	COG0173	Aspartyl-tRNA synthetase (AspS) (PDB:1C0A)	1	1	1	1008	2186	1008	4888		1763	1763	1763					male_bins_95_identity___2781
group_10434	COG0726	Peptidoglycan/xylan/chitin deacetylase	1	1	1	1008	2185	1008	4887		827	827	827					male_bins_95_identity___2782
group_10435	COG0190	5	1	1	1	1008	2184	1008	4886		836	836	836					male_bins_95_identity___2783
group_10436			1	1	1	1008	2183	1008	4885		1139	1139	1139					male_bins_95_identity___2784
group_10437	COG0745	DNA-binding response regulator	1	1	1	1008	2182	1008	4884		656	656	656					male_bins_95_identity___2785
group_10438	COG0642	Signal transduction histidine kinase (BaeS) (PDB:1JOY)	1	1	1	1008	2181	1008	4883		1433	1433	1433					male_bins_95_identity___2786
group_10439			1	1	1	1008	2180	1008	4882		812	812	812					male_bins_95_identity___2787
group_1044	COG3153	Predicted N-acetyltransferase YhbS (yhbS) (PDB:4ZBG)	1	1	1	1340	60	1339	67		533	533	533	male_bins_95_identity___6271
group_10440	COG1482	Mannose-6-phosphate isomerase	1	1	1	1008	2179	1008	4881		1004	1004	1004					male_bins_95_identity___2788
group_10441	COG1309	DNA-binding protein	1	1	1	1008	2178	1008	4880		641	641	641					male_bins_95_identity___2789
group_10442	COG2747	Negative regulator of flagellin synthesis (anti-sigma28 factor) (FlgM)	1	1	1	1008	2177	1008	4879		284	284	284					male_bins_95_identity___2790
group_10443			1	1	1	1008	2176	1008	4878		518	518	518					male_bins_95_identity___2791
group_10444	COG1256	Flagellar hook-associated protein FlgK (FlgK) (PDB:2D4Y)	1	1	1	1008	2175	1008	4877		1802	1802	1802					male_bins_95_identity___2792
group_10445	COG1256	Flagellar hook-associated protein FlgK (FlgK) (PDB:2D4Y)	1	1	1	1008	2174	1008	4876		1883	1883	1883					male_bins_95_identity___2793
group_10446	COG1344	Flagellin and related hook-associated protein FlgL (FlgL) (PDB:1IO1)	1	1	1	1008	2173	1008	4875		1934	1934	1934					male_bins_95_identity___2794
COG1699		Flagellar assembly factor FliW (FliW) (PDB:2AJ7)	1	1	1	1008	2172	1008	4874		467	467	467					male_bins_95_identity___2795
group_10449	COG1344	Flagellin and related hook-associated protein FlgL (FlgL) (PDB:1IO1)	1	1	1	1008	2751	1008	4230		1424	1424	1424					male_bins_95_identity___2797
COG3393		Predicted acetyltransferase	1	1	1	1340	59	1339	66		947	947	947	male_bins_95_identity___6272
group_10450	COG1344	Flagellin and related hook-associated protein FlgL (FlgL) (PDB:1IO1)	1	1	1	1008	2752	1008	4231		1424	1424	1424					male_bins_95_identity___2798
group_10451	COG0463	Glycosyltransferase involved in cell wall bisynthesis (WcaA) (PDB:5MLZ)	1	1	1	1008	2753	1008	4232		1061	1061	1061					male_bins_95_identity___2799
group_10452	COG1344	Flagellin and related hook-associated protein FlgL (FlgL) (PDB:1IO1)	1	1	1	1008	2754	1008	4233		1388	1388	1388					male_bins_95_identity___2800
COG1334		Uncharacterized conserved protein	1	1	1	1008	2755	1008	4234		443	443	443					male_bins_95_identity___2801
group_10454	COG1345	Flagellar capping protein FliD (FliD) (PDB:5FHY)	1	1	1	1008	2756	1008	4235		2015	2015	2015					male_bins_95_identity___2802
group_10455	COG1516	Flagellin-specific chaperone FliS (FliS) (PDB:1ORJ)	1	1	1	1008	2757	1008	4236		455	455	455					male_bins_95_identity___2803
group_10456			1	1	1	1008	2758	1008	4237		476	476	476					male_bins_95_identity___2804
group_10457	COG0463	Glycosyltransferase involved in cell wall bisynthesis (WcaA) (PDB:5MLZ)	1	1	1	1008	2759	1008	4238		1073	1073	1073					male_bins_95_identity___2805
group_10458	COG0463	Glycosyltransferase involved in cell wall bisynthesis (WcaA) (PDB:5MLZ)	1	1	1	1008	2760	1008	4239		1073	1073	1073					male_bins_95_identity___2806
group_10459	COG1344	Flagellin and related hook-associated protein FlgL (FlgL) (PDB:1IO1)	1	1	1	1008	2761	1008	4240		2093	2093	2093					male_bins_95_identity___2807
group_1046			1	1	1	1340	58	1339	65		173	173	173	male_bins_95_identity___6273
group_10460			1	1	1	1008	2762	1008	4241		320	320	320					male_bins_95_identity___2808
group_10461	COG1344	Flagellin and related hook-associated protein FlgL (FlgL) (PDB:1IO1)	1	1	1	1008	2763	1008	4242		3227	3227	3227					male_bins_95_identity___2809
group_10462	COG1344	Flagellin and related hook-associated protein FlgL (FlgL) (PDB:1IO1)	1	1	1	1008	2764	1008	4243		1664	1664	1664					male_bins_95_identity___2810
group_10463			1	1	1	1008	2765	1008	4244		1337	1337	1337					male_bins_95_identity___2811
group_10464	COG0463	Glycosyltransferase involved in cell wall bisynthesis (WcaA) (PDB:5MLZ)	1	1	1	1008	2766	1008	4245		1070	1070	1070					male_bins_95_identity___2812
group_10465			1	1	1	1008	2767	1008	4246		473	473	473					male_bins_95_identity___2813
group_10466	COG0463	Glycosyltransferase involved in cell wall bisynthesis (WcaA) (PDB:5MLZ)	1	1	1	1008	2768	1008	4247		1094	1094	1094					male_bins_95_identity___2814
group_10467	COG0562	UDP-galactopyranose mutase (Glf) (PDB:1I8T)	1	1	1	1008	2769	1008	4248		1133	1133	1133					male_bins_95_identity___2815
COG1345		Flagellar capping protein FliD (FliD) (PDB:5FHY)	1	1	1	1008	2770	1008	4249		1361	1361	1361					male_bins_95_identity___2816
group_10469	COG0690	Preprotein translocase subunit SecE (SecE) (PDB:5MG3) (PUBMED:29684280)	1	1	1	1008	2503	1008	4813		212	212	212					male_bins_95_identity___2818
group_1047	COG1051	ADP-ribose pyrophosphatase YjhB	1	1	1	1340	57	1339	64		254	254	254	male_bins_95_identity___6274
group_10470	COG0250	Transcription termination/antitermination protein NusG (NusG) (PDB:3EWG) (PUBMED:19500594)	1	1	1	1008	2504	1008	4814		845	845	845					male_bins_95_identity___2819
group_10471	COG0080	Ribosomal protein L11 (RplK) (PDB:2E34)	1	1	1	1008	2505	1008	4815		425	425	425					male_bins_95_identity___2820
group_10472	COG2843	Poly-gamma-glutamate biosynthesis protein CapA/YwtB (capsule formation)	1	1	1	1008	3338	1008	4039		1208	1208	1208					male_bins_95_identity___2822
group_10473	COG0244	Ribosomal protein L10 (RplJ) (PDB:5IT8)	1	1	1	1008	3339	1008	4038		572	572	572					male_bins_95_identity___2823
group_10474	COG0222	Ribosomal protein L7/L12 (RplL) (PDB:1CTF)	1	1	1	1008	3340	1008	4037		374	374	374					male_bins_95_identity___2824
group_10475	COG1309	DNA-binding protein	1	1	1	1008	8037	1008	8340		545	545	545					male_bins_95_identity___3592
group_10476	COG1737	DNA-binding transcriptional regulator	1	1	1	1008	8036	1008	8339		935	935	935					male_bins_95_identity___3593
group_10477	COG2081	Predicted flavoprotein YhiN (YhiN) (PDB:3V76)	1	1	1	1008	8035	1008	8338		1307	1307	1307					male_bins_95_identity___3594
group_10478	COG0283	Cytidylate kinase (Cmk) (PDB:3R20) (PUBMED:19111750	1	1	1	1008	8034	1008	8337		668	668	668					male_bins_95_identity___3595
group_10479	COG0761	4-Hydroxy-3-methylbut-2-enyl diphosphate reductase IspH (IspH) (PDB:3DNF)	1	1	1	1008	8033	1008	8348		869	869	869					male_bins_95_identity___3596
group_1048	COG2768	Uncharacterized Fe-S cluster protein	1	1	1	1340	56	1339	63		881	881	881	male_bins_95_identity___6275
group_10480	COG0539	Ribosomal protein S1 (RpsA) (PDB:4NNH)	1	1	1	1008	8032	1008	8349		1163	1163	1163					male_bins_95_identity___3597
group_10481	COG3359	Uncharacterized conserved protein YprB	1	1	1	1008	8024	1008	8353		1127	1127	1127					male_bins_95_identity___3599
group_10482	COG4656	Na+-translocating ferredoxin:NAD+ oxidoreductase RNF	1	1	1	1008	8023	1008	8354		1316	1316	1316					male_bins_95_identity___3600
group_10483	COG4658	Na+-translocating ferredoxin:NAD+ oxidoreductase RNF	1	1	1	1008	8022	1008	8355		935	935	935					male_bins_95_identity___3601
group_10484	COG4659	Na+-translocating ferredoxin:NAD+ oxidoreductase RNF	1	1	1	1008	8021	1008	8356		629	629	629					male_bins_95_identity___3602
group_10485	COG4660	Na+-translocating ferredoxin:NAD+ oxidoreductase RNF	1	1	1	1008	8020	1008	8357		806	806	806					male_bins_95_identity___3603
group_10486	COG2221	Dissimilatory sulfite reductase (desulfoviridin)	1	1	1	1008	7990	1008	8362		791	791	791					male_bins_95_identity___3605
COG4332		Uncharacterized conserved protein	1	1	1	1008	7989	1008	8363		596	596	596					male_bins_95_identity___3606
group_10488			1	1	1	1008	7988	1008	8364		524	524	524					male_bins_95_identity___3607
group_10489	COG2169	Methylphosphotriester-DNA--protein-cysteine methyltransferase (N-terminal fragment of Ada)	1	1	1	1008	7987	1008	8365		947	947	947					male_bins_95_identity___3608
group_1049	COG0789	DNA-binding transcriptional regulator	1	1	1	1340	55	1339	62		464	464	464	male_bins_95_identity___6276
group_10490			1	1	1	1008	7986	1008	8366		605	605	605					male_bins_95_identity___3609
group_10491	COG0733	Na+-dependent transporter	1	1	1	1008	7985	1008	8367		1409	1409	1409					male_bins_95_identity___3610
group_10492	COG0110	Acetyltransferase	1	1	1	1008	7984	1008	8368		605	605	605					male_bins_95_identity___3611
group_10493	COG3854	Stage III sporulation protein SpoIIIAA (SpoIIIAA)	1	1	1	1008	7983	1008	8369		938	938	938					male_bins_95_identity___3612
group_10494			1	1	1	1008	7982	1008	8370		512	512	512					male_bins_95_identity___3613
group_10495	COG5825	Stage III sporulation protein SpoIIIAD	1	1	1	1008	7978	1008	8377		380	380	380					male_bins_95_identity___3615
COG5826		Stage III sporulation protein SpoIIIAE	1	1	1	1008	7977	1008	8376		1064	1064	1064					male_bins_95_identity___3616
group_10497			1	1	1	1008	7976	1008	8375		386	386	386					male_bins_95_identity___3617
group_10498	COG5828	Stage III sporulation protein SpoIIIAG	1	1	1	1008	7975	1008	8374		629	629	629					male_bins_95_identity___3618
group_10499	COG5829	Stage III sporulation protein SpoIIIAH	1	1	1	1008	7974	1008	8373		815	815	815					male_bins_95_identity___3619
group_1050	COG0730	Sulfite exporter TauE/SafE/YfcA and related permeases	1	1	1	1340	54	1339	61		770	770	770	male_bins_95_identity___6277
group_10500	COG5279	Cytokinesis protein 3	1	1	1	1008	7952	1008	6357		1223	1223	1223					male_bins_95_identity___3621
group_10501	COG1302	Uncharacterized conserved protein YloU	1	1	1	1008	7951	1008	6356		386	386	386					male_bins_95_identity___3622
group_10502	COG0781	Transcription antitermination protein NusB (NusB) (PDB:1EY1) (PUBMED:21652641)	1	1	1	1008	7950	1008	6355		431	431	431					male_bins_95_identity___3623
group_10503	COG1570	Exonuclease VII	1	1	1	1008	7949	1008	6354		1256	1256	1256					male_bins_95_identity___3624
group_10504	COG1722	Exonuclease VII small subunit (XseB) (PDB:1VP7)	1	1	1	1008	7948	1008	6353		206	206	206					male_bins_95_identity___3625
group_10505	COG0142	Geranylgeranyl pyrophosphate synthase (IspA) (PDB:2AZJ)	1	1	1	1008	7947	1008	6352		917	917	917					male_bins_95_identity___3626
group_10506	COG1154	Deoxyxylulose-5-phosphate synthase (Dxs) (PDB:2O1S)	1	1	1	1008	7946	1008	6351		1859	1859	1859					male_bins_95_identity___3627
group_10507	COG1189	Predicted rRNA methylase YqxC	1	1	1	1008	7945	1008	6350		839	839	839					male_bins_95_identity___3628
group_10508	COG0061	NAD kinase (NadK) (PDB:1SUW)	1	1	1	1008	7944	1008	6349		809	809	809					male_bins_95_identity___3629
group_10509	COG1438	Arginine repressor (ArgR) (PDB:1AOY)	1	1	1	1008	7943	1008	6348		455	455	455					male_bins_95_identity___3630
group_1051	COG0596	2-succinyl-6-hydroxy-2	1	1	1	1340	53	1339	60		380	380	380	male_bins_95_identity___6278
group_10510	COG0497	DNA repair ATPase RecN (RecN) (PDB:4AD8)	1	1	1	1008	7942	1008	6347		1676	1676	1676					male_bins_95_identity___3631
group_10511	COG0840	Methyl-accepting chemotaxis protein (MCP) (Tar) (PDB:1QU7)	1	1	1	1008	7941	1008	6346		581	581	581					male_bins_95_identity___3632
group_10512			1	1	1	1008	7940	1008	6345		716	716	716					male_bins_95_identity___3633
group_10513	COG0845	Multidrug efflux pump subunit AcrA (membrane-fusion protein) (AcrA) (PDB:1T5E)	1	1	1	1008	7939	1008	6344		1568	1568	1568					male_bins_95_identity___3634
group_10514	COG0841	Multidrug efflux pump subunit AcrB (AcrB) (PDB:1IWG)	1	1	1	1008	7938	1008	6343		3068	3068	3068					male_bins_95_identity___3635
[truncated: 39,359 more rows]

## Sheet: common_set_males
Gene	Non-unique Gene name	Annotation	No. isolates	No. sequences	Avg sequences per isolate	Genome Fragment	Order within Fragment	Accessory Fragment	Accessory Order with Fragment	QC	Min group size nuc	Max group size nuc	Avg group size nuc	Acetatifactor_sp011959105	COE1_sp002358575	Dubosiella_sp004793885	Kineothrix_sp000403275	Muribaculaceae	Paramuribaculum_sp001689565	RACS_045_sp013316135	UBA11940_sp013316055	UBA3282	UBA7173_sp001915385	UMGS1004_sp003343805	UMGS1994_sp900553945
[truncated: 44 more rows]
