# Supplementary material for: Degenerative Cervical Myelopathy induces sex-specific dysbiosis in mice
Source: Front Microbiol. 2023 Oct 20;14:1229783. doi: 10.3389/fmicb.2023.1229783 (PMC10623434; doi:10.3389/fmicb.2023.1229783)
Supplement: Supplementary file 6 [file Table_6.XLSX]

## Sheet: female-metagenome-metabolism_ko
unique_id	bin_name	db_name	ko	gene_caller_id	contig	modules_with_ko	ko_definition
0	Alistipes_sp009774895	Alistipes_sp009774895	K21071	4827	NODE_5697_length_4113_cov_6_539182	M00001	ATP-dependent phosphofructokinase / diphosphate-dependent phosphofructokinase [EC:2.7.1.11 2.7.1.90]
1	Alistipes_sp009774895	Alistipes_sp009774895	K01810	17523	NODE_48_length_53782_cov_8_950453	M00001,M00004,M00892,M00909	glucose-6-phosphate isomerase [EC:5.3.1.9]
2	Alistipes_sp009774895	Alistipes_sp009774895	K00927	79	NODE_89_length_42974_cov_9_696335	M00001,M00002,M00003,M00308,M00552,M00165,M00166,M00611,M00612	phosphoglycerate kinase [EC:2.7.2.3]
3	Alistipes_sp009774895	Alistipes_sp009774895	K00134	15246	NODE_31_length_65208_cov_9_345019	M00001,M00002,M00003,M00308,M00552,M00165,M00166,M00611,M00612	glyceraldehyde 3-phosphate dehydrogenase [EC:1.2.1.12]
4	Alistipes_sp009774895	Alistipes_sp009774895	K01624	12516	NODE_649_length_16368_cov_9_030773	M00001,M00003,M00165,M00167,M00345,M00344,M00611,M00612	fructose-bisphosphate aldolase, class II [EC:4.1.2.13]
5	Alistipes_sp009774895	Alistipes_sp009774895	K01834	16574	NODE_39_length_60036_cov_7_418116	M00001,M00002,M00003	2,3-bisphosphoglycerate-dependent phosphoglycerate mutase [EC:5.4.2.11]
6	Alistipes_sp009774895	Alistipes_sp009774895	K15633	16551	NODE_39_length_60036_cov_7_418116	M00001,M00002,M00003	2,3-bisphosphoglycerate-independent phosphoglycerate mutase [EC:5.4.2.12]
7	Alistipes_sp009774895	Alistipes_sp009774895	K00845	14467	NODE_1_length_146572_cov_8_806255	M00001,M00549,M00892,M00909	glucokinase [EC:2.7.1.2]
8	Alistipes_sp009774895	Alistipes_sp009774895	K00845	1309	NODE_178_length_32309_cov_8_518509	M00001,M00549,M00892,M00909	glucokinase [EC:2.7.1.2]
9	Alistipes_sp009774895	Alistipes_sp009774895	K01803	14449	NODE_1_length_146572_cov_8_806255	M00001,M00002,M00003	triosephosphate isomerase (TIM) [EC:5.3.1.1]
10	Alistipes_sp009774895	Alistipes_sp009774895	K00850	14876	NODE_5_length_114957_cov_9_480653	M00001,M00345	6-phosphofructokinase 1 [EC:2.7.1.11]
11	Alistipes_sp009774895	Alistipes_sp009774895	K01689	14503	NODE_1_length_146572_cov_8_806255	M00001,M00002,M00003,M00346	enolase [EC:4.2.1.11]
12	Alistipes_sp009774895	Alistipes_sp009774895	K00873	17571	NODE_1455_length_10192_cov_7_470948	M00001,M00002,M00049,M00050	pyruvate kinase [EC:2.7.1.40]
13	Alistipes_sp009774895	Alistipes_sp009774895	K03841	1296	NODE_178_length_32309_cov_8_518509	M00003,M00165,M00167,M00344,M00611,M00612	fructose-1,6-bisphosphatase I [EC:3.1.3.11]
14	Alistipes_sp009774895	Alistipes_sp009774895	K01610	14491	NODE_1_length_146572_cov_8_806255	M00003,M00170	phosphoenolpyruvate carboxykinase (ATP) [EC:4.1.1.49]
15	Alistipes_sp009774895	Alistipes_sp009774895	K00382	9416	NODE_457_length_19557_cov_8_118347	M00307,M00009,M00011,M00532,M00036,M00032	dihydrolipoamide dehydrogenase [EC:1.8.1.4]
16	Alistipes_sp009774895	Alistipes_sp009774895	K03737	18547	NODE_54_length_52269_cov_8_164247	M00307,M00173,M00614	pyruvate-ferredoxin/flavodoxin oxidoreductase [EC:1.2.7.1 1.2.7.-]
17	Alistipes_sp009774895	Alistipes_sp009774895	K00024	15275	NODE_31_length_65208_cov_9_345019	M00009,M00011,M00012,M00740,M00168,M00173,M00374,M00620,M00346,M00614	malate dehydrogenase [EC:1.1.1.37]
18	Alistipes_sp009774895	Alistipes_sp009774895	K00239	7688	NODE_367_length_22214_cov_7_095672	M00009,M00011,M00173,M00376,M00374,M00149,M00613,M00614	succinate dehydrogenase / fumarate reductase, flavoprotein subunit [EC:1.3.5.1 1.3.5.4]
19	Alistipes_sp009774895	Alistipes_sp009774895	K00174	16530	NODE_39_length_60036_cov_7_418116	M00009,M00011,M00173,M00620,M00614	2-oxoglutarate/2-oxoacid ferredoxin oxidoreductase subunit alpha [EC:1.2.7.3 1.2.7.11]
20	Alistipes_sp009774895	Alistipes_sp009774895	K00174	17085	NODE_41_length_58418_cov_7_187345	M00009,M00011,M00173,M00620,M00614	2-oxoglutarate/2-oxoacid ferredoxin oxidoreductase subunit alpha [EC:1.2.7.3 1.2.7.11]
21	Alistipes_sp009774895	Alistipes_sp009774895	K00177	17083	NODE_41_length_58418_cov_7_187345	M00009,M00011,M00173,M00620,M00614	2-oxoglutarate ferredoxin oxidoreductase subunit gamma [EC:1.2.7.3]
22	Alistipes_sp009774895	Alistipes_sp009774895	K00176	17086	NODE_41_length_58418_cov_7_187345	M00009,M00011,M00173,M00620,M00614	2-oxoglutarate ferredoxin oxidoreductase subunit delta [EC:1.2.7.3]
23	Alistipes_sp009774895	Alistipes_sp009774895	K00175	16529	NODE_39_length_60036_cov_7_418116	M00009,M00011,M00173,M00620,M00614	2-oxoglutarate/2-oxoacid ferredoxin oxidoreductase subunit beta [EC:1.2.7.3 1.2.7.11]
24	Alistipes_sp009774895	Alistipes_sp009774895	K00175	17084	NODE_41_length_58418_cov_7_187345	M00009,M00011,M00173,M00620,M00614	2-oxoglutarate/2-oxoacid ferredoxin oxidoreductase subunit beta [EC:1.2.7.3 1.2.7.11]
25	Alistipes_sp009774895	Alistipes_sp009774895	K01676	733	NODE_109_length_39689_cov_8_252309	M00009,M00011,M00173,M00613,M00614	fumarate hydratase, class I [EC:4.2.1.2]
26	Alistipes_sp009774895	Alistipes_sp009774895	K00240	7689	NODE_367_length_22214_cov_7_095672	M00009,M00011,M00173,M00376,M00374,M00149,M00613,M00614	succinate dehydrogenase / fumarate reductase, iron-sulfur subunit [EC:1.3.5.1 1.3.5.4]
27	Alistipes_sp009774895	Alistipes_sp009774895	K00241	7687	NODE_367_length_22214_cov_7_095672	M00009,M00011,M00173,M00376,M00374,M00149,M00613,M00614	succinate dehydrogenase / fumarate reductase, cytochrome b subunit
28	Alistipes_sp009774895	Alistipes_sp009774895	K00616	18076	NODE_52_length_52524_cov_9_748633	M00004,M00007	transaldolase [EC:2.2.1.2]
29	Alistipes_sp009774895	Alistipes_sp009774895	K00615	15584	NODE_32_length_63147_cov_7_072973	M00004,M00007,M00165,M00167,M00611,M00612	transketolase [EC:2.2.1.1]
30	Alistipes_sp009774895	Alistipes_sp009774895	K01783	17102	NODE_1367_length_10618_cov_6_501373	M00004,M00007	ribulose-phosphate 3-epimerase [EC:5.1.3.1]
31	Alistipes_sp009774895	Alistipes_sp009774895	K01808	8319	NODE_385_length_21468_cov_6_851072	M00004,M00007,M00165,M00167,M00611,M00612	ribose 5-phosphate isomerase B [EC:5.3.1.6]
32	Alistipes_sp009774895	Alistipes_sp009774895	K00948	16559	NODE_39_length_60036_cov_7_418116	M00005	ribose-phosphate pyrophosphokinase [EC:2.7.6.1]
33	Alistipes_sp009774895	Alistipes_sp009774895	K00012	12076	NODE_624_length_16710_cov_7_657760	M00014,M00129	UDPglucose 6-dehydrogenase [EC:1.1.1.22]
34	Alistipes_sp009774895	Alistipes_sp009774895	K01785	15939	NODE_35_length_61761_cov_7_096004	M00632	aldose 1-epimerase [EC:5.1.3.3]
35	Alistipes_sp009774895	Alistipes_sp009774895	K01785	9996	NODE_460_length_19508_cov_8_266283	M00632	aldose 1-epimerase [EC:5.1.3.3]
36	Alistipes_sp009774895	Alistipes_sp009774895	K00849	11122	NODE_521_length_18208_cov_7_240236	M00632,M00554	galactokinase [EC:2.7.1.6]
37	Alistipes_sp009774895	Alistipes_sp009774895	K01784	2335	NODE_185_length_31624_cov_10_361177	M00632	UDP-glucose 4-epimerase [EC:5.1.3.2]
38	Alistipes_sp009774895	Alistipes_sp009774895	K01809	1307	NODE_178_length_32309_cov_8_518509	M00114	mannose-6-phosphate isomerase [EC:5.3.1.8]
39	Alistipes_sp009774895	Alistipes_sp009774895	K00703	14917	NODE_5_length_114957_cov_9_480653	M00854,M00565	starch synthase [EC:2.4.1.21]
40	Alistipes_sp009774895	Alistipes_sp009774895	K16153	14494	NODE_1_length_146572_cov_8_806255	M00854,M00855	glycogen phosphorylase/synthase [EC:2.4.1.1 2.4.1.11]
41	Alistipes_sp009774895	Alistipes_sp009774895	K00700	19708	NODE_79_length_44168_cov_7_503820	M00854,M00565	1,4-alpha-glucan branching enzyme [EC:2.4.1.18]
42	Alistipes_sp009774895	Alistipes_sp009774895	K16150	14496	NODE_1_length_146572_cov_8_806255	M00854	glycogen synthase [EC:2.4.1.11]
43	Alistipes_sp009774895	Alistipes_sp009774895	K01835	17060	NODE_41_length_58418_cov_7_187345	M00855,M00549	phosphoglucomutase [EC:5.4.2.2]
44	Alistipes_sp009774895	Alistipes_sp009774895	K00688	14494	NODE_1_length_146572_cov_8_806255	M00855	glycogen phosphorylase [EC:2.4.1.1]
45	Alistipes_sp009774895	Alistipes_sp009774895	K00820	15633	NODE_1127_length_11909_cov_6_790535	M00892,M00909	glutamine---fructose-6-phosphate transaminase (isomerizing) [EC:2.6.1.16]
46	Alistipes_sp009774895	Alistipes_sp009774895	K01966	3702	NODE_224_length_28757_cov_7_778064	M00373,M00741,M00613	propionyl-CoA carboxylase beta chain [EC:6.4.1.3 2.1.3.15]
47	Alistipes_sp009774895	Alistipes_sp009774895	K01847	10574	NODE_474_length_19207_cov_7_797567	M00373,M00741,M00376,M00613	methylmalonyl-CoA mutase [EC:5.4.99.2]
48	Alistipes_sp009774895	Alistipes_sp009774895	K05606	3701	NODE_224_length_28757_cov_7_778064	M00373,M00741,M00376,M00375,M00613	methylmalonyl-CoA/ethylmalonyl-CoA epimerase [EC:5.1.99.1]
49	Alistipes_sp009774895	Alistipes_sp009774895	K00281	14420	NODE_1_length_146572_cov_8_806255	M00532	glycine dehydrogenase [EC:1.4.4.2]
50	Alistipes_sp009774895	Alistipes_sp009774895	K00600	15636	NODE_1127_length_11909_cov_6_790535	M00532,M00346,M00140,M00141	glycine hydroxymethyltransferase [EC:2.1.2.1]
51	Alistipes_sp009774895	Alistipes_sp009774895	K02437	15276	NODE_31_length_65208_cov_9_345019	M00532	glycine cleavage system H protein
52	Alistipes_sp009774895	Alistipes_sp009774895	K00605	14431	NODE_1_length_146572_cov_8_806255	M00532	aminomethyltransferase [EC:2.1.2.10]
53	Alistipes_sp009774895	Alistipes_sp009774895	K01006	14521	NODE_1_length_146572_cov_8_806255	M00169,M00172,M00171,M00173,M00614	pyruvate, orthophosphate dikinase [EC:2.7.9.1]
54	Alistipes_sp009774895	Alistipes_sp009774895	K00297	15591	NODE_32_length_63147_cov_7_072973	M00377,M00618	methylenetetrahydrofolate reductase (NADPH) [EC:1.5.1.20]
55	Alistipes_sp009774895	Alistipes_sp009774895	K01491	16580	NODE_1293_length_11016_cov_6_881033	M00377,M00140,M00618	methylenetetrahydrofolate dehydrogenase (NADP+) / methenyltetrahydrofolate cyclohydrolase [EC:1.5.1.5 3.5.4.9]
56	Alistipes_sp009774895	Alistipes_sp009774895	K00925	15307	NODE_1110_length_12048_cov_7_588510	M00579,M00357,M00617,M00618	acetate kinase [EC:2.7.2.1]
57	Alistipes_sp009774895	Alistipes_sp009774895	K22481	14888	NODE_5_length_114957_cov_9_480653	M00567,M00357,M00356,M00563	heterodisulfide reductase subunit B1 [EC:1.8.7.3]
58	Alistipes_sp009774895	Alistipes_sp009774895	K22482	14889	NODE_5_length_114957_cov_9_480653	M00567,M00357,M00356,M00563	heterodisulfide reductase subunit C1 [EC:1.8.7.3]
59	Alistipes_sp009774895	Alistipes_sp009774895	K00018	11120	NODE_521_length_18208_cov_7_240236	M00346	glycerate dehydrogenase [EC:1.1.1.29]
60	Alistipes_sp009774895	Alistipes_sp009774895	K00425	14447	NODE_1_length_146572_cov_8_806255	M00153	cytochrome bd ubiquinol oxidase subunit I [EC:7.1.1.7]
61	Alistipes_sp009774895	Alistipes_sp009774895	K00426	14446	NODE_1_length_146572_cov_8_806255	M00153	cytochrome bd ubiquinol oxidase subunit II [EC:7.1.1.7]
62	Alistipes_sp009774895	Alistipes_sp009774895	K02121	15601	NODE_32_length_63147_cov_7_072973	M00159	V/A-type H+/Na+-transporting ATPase subunit E
63	Alistipes_sp009774895	Alistipes_sp009774895	K02124	15595	NODE_32_length_63147_cov_7_072973	M00159	V/A-type H+/Na+-transporting ATPase subunit K
64	Alistipes_sp009774895	Alistipes_sp009774895	K02123	15596	NODE_32_length_63147_cov_7_072973	M00159	V/A-type H+/Na+-transporting ATPase subunit I
65	Alistipes_sp009774895	Alistipes_sp009774895	K02120	15597	NODE_32_length_63147_cov_7_072973	M00159	V/A-type H+/Na+-transporting ATPase subunit D
66	Alistipes_sp009774895	Alistipes_sp009774895	K02117	15599	NODE_32_length_63147_cov_7_072973	M00159	V/A-type H+/Na+-transporting ATPase subunit A [EC:7.1.2.2 7.2.2.1]
67	Alistipes_sp009774895	Alistipes_sp009774895	K00645	15631	NODE_32_length_63147_cov_7_072973	M00082,M00873,M00874	[acyl-carrier-protein] S-malonyltransferase [EC:2.3.1.39]
68	Alistipes_sp009774895	Alistipes_sp009774895	K00648	18066	NODE_52_length_52524_cov_9_748633	M00082	3-oxoacyl-[acyl-carrier-protein] synthase III [EC:2.3.1.180]
69	Alistipes_sp009774895	Alistipes_sp009774895	K16363	11618	NODE_525_length_18172_cov_7_509466	M00083,M00866	UDP-3-O-[3-hydroxymyristoyl] N-acetylglucosamine deacetylase / 3-hydroxyacyl-[acyl-carrier-protein] dehydratase [EC:3.5.1.108 4.2.1.59]
70	Alistipes_sp009774895	Alistipes_sp009774895	K02372	11618	NODE_525_length_18172_cov_7_509466	M00083,M00572	3-hydroxyacyl-[acyl-carrier-protein] dehydratase [EC:4.2.1.59]
71	Alistipes_sp009774895	Alistipes_sp009774895	K09458	14509	NODE_1_length_146572_cov_8_806255	M00083,M00873,M00874,M00572	3-oxoacyl-[acyl-carrier-protein] synthase II [EC:2.3.1.179]
72	Alistipes_sp009774895	Alistipes_sp009774895	K00059	15637	NODE_1127_length_11909_cov_6_790535	M00083,M00874,M00572	3-oxoacyl-[acyl-carrier protein] reductase [EC:1.1.1.100]
73	Alistipes_sp009774895	Alistipes_sp009774895	K00208	14445	NODE_1_length_146572_cov_8_806255	M00083,M00572	enoyl-[acyl-carrier protein] reductase I [EC:1.3.1.9 1.3.1.10]
74	Alistipes_sp009774895	Alistipes_sp009774895	K01897	14428	NODE_1_length_146572_cov_8_806255	M00086	long-chain acyl-CoA synthetase [EC:6.2.1.3]
75	Alistipes_sp009774895	Alistipes_sp009774895	K01897	15917	NODE_35_length_61761_cov_7_096004	M00086	long-chain acyl-CoA synthetase [EC:6.2.1.3]
76	Alistipes_sp009774895	Alistipes_sp009774895	K00249	1814	NODE_2484_length_7232_cov_7_205100	M00087,M00036	acyl-CoA dehydrogenase [EC:1.3.8.7]
77	Alistipes_sp009774895	Alistipes_sp009774895	K00655	14066	NODE_914_length_13579_cov_6_382801	M00089	1-acyl-sn-glycerol-3-phosphate acyltransferase [EC:2.3.1.51]
78	Alistipes_sp009774895	Alistipes_sp009774895	K17103	6259	NODE_301_length_24670_cov_7_903961	M00093	CDP-diacylglycerol---serine O-phosphatidyltransferase [EC:2.7.8.8]
79	Alistipes_sp009774895	Alistipes_sp009774895	K00981	18523	NODE_54_length_52269_cov_8_164247	M00093	phosphatidate cytidylyltransferase [EC:2.7.7.41]
80	Alistipes_sp009774895	Alistipes_sp009774895	K01613	18522	NODE_54_length_52269_cov_8_164247	M00093	phosphatidylserine decarboxylase [EC:4.1.1.65]
81	Alistipes_sp009774895	Alistipes_sp009774895	K01933	19676	NODE_79_length_44168_cov_7_503820	M00048	phosphoribosylformylglycinamidine cyclo-ligase [EC:6.3.3.1]
82	Alistipes_sp009774895	Alistipes_sp009774895	K01923	19678	NODE_79_length_44168_cov_7_503820	M00048	phosphoribosylaminoimidazole-succinocarboxamide synthase [EC:6.3.2.6]
83	Alistipes_sp009774895	Alistipes_sp009774895	K01756	15250	NODE_31_length_65208_cov_9_345019	M00048,M00049	adenylosuccinate lyase [EC:4.3.2.2]
84	Alistipes_sp009774895	Alistipes_sp009774895	K11175	19675	NODE_79_length_44168_cov_7_503820	M00048	phosphoribosylglycinamide formyltransferase 1 [EC:2.1.2.2]
85	Alistipes_sp009774895	Alistipes_sp009774895	K01945	16581	NODE_1293_length_11016_cov_6_881033	M00048	phosphoribosylamine---glycine ligase [EC:6.3.4.13]
86	Alistipes_sp009774895	Alistipes_sp009774895	K00602	19674	NODE_79_length_44168_cov_7_503820	M00048	phosphoribosylaminoimidazolecarboxamide formyltransferase / IMP cyclohydrolase [EC:2.1.2.3 3.5.4.10]
87	Alistipes_sp009774895	Alistipes_sp009774895	K00764	19677	NODE_79_length_44168_cov_7_503820	M00048	amidophosphoribosyltransferase [EC:2.4.2.14]
88	Alistipes_sp009774895	Alistipes_sp009774895	K01952	19679	NODE_79_length_44168_cov_7_503820	M00048	phosphoribosylformylglycinamidine synthase [EC:6.3.5.3]
89	Alistipes_sp009774895	Alistipes_sp009774895	K01589	19680	NODE_79_length_44168_cov_7_503820	M00048	5-(carboxyamino)imidazole ribonucleotide synthase [EC:6.3.4.18]
90	Alistipes_sp009774895	Alistipes_sp009774895	K01588	19681	NODE_79_length_44168_cov_7_503820	M00048	5-(carboxyamino)imidazole ribonucleotide mutase [EC:5.4.99.18]
91	Alistipes_sp009774895	Alistipes_sp009774895	K01939	1817	NODE_2484_length_7232_cov_7_205100	M00049	adenylosuccinate synthase [EC:6.3.4.4]
92	Alistipes_sp009774895	Alistipes_sp009774895	K00939	14423	NODE_1_length_146572_cov_8_806255	M00049	adenylate kinase [EC:2.7.4.3]
93	Alistipes_sp009774895	Alistipes_sp009774895	K00942	17091	NODE_41_length_58418_cov_7_187345	M00050	guanylate kinase [EC:2.7.4.8]
94	Alistipes_sp009774895	Alistipes_sp009774895	K00088	15291	NODE_31_length_65208_cov_9_345019	M00050	IMP dehydrogenase [EC:1.1.1.205]
95	Alistipes_sp009774895	Alistipes_sp009774895	K01951	15294	NODE_31_length_65208_cov_9_345019	M00050	GMP synthase (glutamine-hydrolysing) [EC:6.3.5.2]
96	Alistipes_sp009774895	Alistipes_sp009774895	K00609	19683	NODE_79_length_44168_cov_7_503820	M00051	aspartate carbamoyltransferase catalytic subunit [EC:2.1.3.2]
97	Alistipes_sp009774895	Alistipes_sp009774895	K00254	17550	NODE_48_length_53782_cov_8_950453	M00051	dihydroorotate dehydrogenase [EC:1.3.5.2]
98	Alistipes_sp009774895	Alistipes_sp009774895	K01956	19690	NODE_79_length_44168_cov_7_503820	M00051	carbamoyl-phosphate synthase small subunit [EC:6.3.5.5]
99	Alistipes_sp009774895	Alistipes_sp009774895	K00226	12504	NODE_649_length_16368_cov_9_030773	M00051	dihydroorotate dehydrogenase (fumarate) [EC:1.3.98.1]
100	Alistipes_sp009774895	Alistipes_sp009774895	K01591	19686	NODE_79_length_44168_cov_7_503820	M00051	orotidine-5'-phosphate decarboxylase [EC:4.1.1.23]
101	Alistipes_sp009774895	Alistipes_sp009774895	K01465	19691	NODE_79_length_44168_cov_7_503820	M00051	dihydroorotase [EC:3.5.2.3]
102	Alistipes_sp009774895	Alistipes_sp009774895	K01955	19689	NODE_79_length_44168_cov_7_503820	M00051	carbamoyl-phosphate synthase large subunit [EC:6.3.5.5]
103	Alistipes_sp009774895	Alistipes_sp009774895	K17828	19687	NODE_79_length_44168_cov_7_503820	M00051	dihydroorotate dehydrogenase (NAD+) catalytic subunit [EC:1.3.1.14]
104	Alistipes_sp009774895	Alistipes_sp009774895	K00762	19684	NODE_79_length_44168_cov_7_503820	M00051	orotate phosphoribosyltransferase [EC:2.4.2.10]
105	Alistipes_sp009774895	Alistipes_sp009774895	K01937	15302	NODE_1110_length_12048_cov_7_588510	M00052	CTP synthase [EC:6.3.4.2]
106	Alistipes_sp009774895	Alistipes_sp009774895	K09903	739	NODE_109_length_39689_cov_8_252309	M00052	uridylate kinase [EC:2.7.4.22]
107	Alistipes_sp009774895	Alistipes_sp009774895	K21636	8917	NODE_406_length_20809_cov_7_889612	M00053	ribonucleoside-triphosphate reductase (formate) [EC:1.1.98.6]
108	Alistipes_sp009774895	Alistipes_sp009774895	K00560	14891	NODE_5_length_114957_cov_9_480653	M00053	thymidylate synthase [EC:2.1.1.45]
109	Alistipes_sp009774895	Alistipes_sp009774895	K00943	12069	NODE_624_length_16710_cov_7_657760	M00053	dTMP kinase [EC:2.7.4.9]
110	Alistipes_sp009774895	Alistipes_sp009774895	K00525	7680	NODE_367_length_22214_cov_7_095672	M00053	ribonucleoside-diphosphate reductase alpha chain [EC:1.17.4.1]
111	Alistipes_sp009774895	Alistipes_sp009774895	K01079	16544	NODE_39_length_60036_cov_7_418116	M00020	phosphoserine phosphatase [EC:3.1.3.3]
112	Alistipes_sp009774895	Alistipes_sp009774895	K00058	17088	NODE_41_length_58418_cov_7_187345	M00020	D-3-phosphoglycerate dehydrogenase / 2-oxoglutarate reductase [EC:1.1.1.95 1.1.1.399]
113	Alistipes_sp009774895	Alistipes_sp009774895	K00831	17089	NODE_41_length_58418_cov_7_187345	M00020,M00124	phosphoserine aminotransferase [EC:2.6.1.52]
114	Alistipes_sp009774895	Alistipes_sp009774895	K00133	15286	NODE_31_length_65208_cov_9_345019	M00018,M00033,M00017,M00016,M00525,M00526,M00527	aspartate-semialdehyde dehydrogenase [EC:1.2.1.11]
115	Alistipes_sp009774895	Alistipes_sp009774895	K00789	15583	NODE_32_length_63147_cov_7_072973	M00609,M00034,M00035,M00368	S-adenosylmethionine synthetase [EC:2.5.1.6]
116	Alistipes_sp009774895	Alistipes_sp009774895	K00548	15590	NODE_32_length_63147_cov_7_072973	M00017	5-methyltetrahydrofolate--homocysteine methyltransferase [EC:2.1.1.13]
117	Alistipes_sp009774895	Alistipes_sp009774895	K01251	18519	NODE_54_length_52269_cov_8_164247	M00035	adenosylhomocysteinase [EC:3.3.1.1]
118	Alistipes_sp009774895	Alistipes_sp009774895	K00826	6269	NODE_6013_length_3958_cov_12_196003	M00019,M00570,M00036,M00119	branched-chain amino acid aminotransferase [EC:2.6.1.42]
119	Alistipes_sp009774895	Alistipes_sp009774895	K00674	15278	NODE_31_length_65208_cov_9_345019	M00016	2,3,4,5-tetrahydropyridine-2,6-dicarboxylate N-succinyltransferase [EC:2.3.1.117]
120	Alistipes_sp009774895	Alistipes_sp009774895	K01778	17557	NODE_48_length_53782_cov_8_950453	M00016,M00525,M00527	diaminopimelate epimerase [EC:5.1.1.7]
121	Alistipes_sp009774895	Alistipes_sp009774895	K00215	17052	NODE_41_length_58418_cov_7_187345	M00016,M00525,M00526,M00527	4-hydroxy-tetrahydrodipicolinate reductase [EC:1.17.1.8]
122	Alistipes_sp009774895	Alistipes_sp009774895	K01714	14525	NODE_920_length_13490_cov_7_382508	M00016,M00525,M00526,M00527	4-hydroxy-tetrahydrodipicolinate synthase [EC:4.3.3.7]
123	Alistipes_sp009774895	Alistipes_sp009774895	K05823	15592	NODE_32_length_63147_cov_7_072973	M00525	N-acetyldiaminopimelate deacetylase [EC:3.5.1.47]
124	Alistipes_sp009774895	Alistipes_sp009774895	K00290	7012	NODE_332_length_23466_cov_6_985690	M00030	saccharopine dehydrogenase (NAD+, L-lysine forming) [EC:1.5.1.7]
125	Alistipes_sp009774895	Alistipes_sp009774895	K01480	17548	NODE_48_length_53782_cov_8_950453	M00133	agmatinase [EC:3.5.3.11]
126	Alistipes_sp009774895	Alistipes_sp009774895	K01712	18568	NODE_1534_length_9885_cov_6_611801	M00045	urocanate hydratase [EC:4.2.1.49]
127	Alistipes_sp009774895	Alistipes_sp009774895	K01745	18567	NODE_1534_length_9885_cov_6_611801	M00045	histidine ammonia-lyase [EC:4.3.1.3]
128	Alistipes_sp009774895	Alistipes_sp009774895	K13990	18569	NODE_1534_length_9885_cov_6_611801	M00045	glutamate formiminotransferase / formiminotetrahydrofolate cyclodeaminase [EC:2.1.2.5 4.3.1.4]
129	Alistipes_sp009774895	Alistipes_sp009774895	K01468	15897	NODE_35_length_61761_cov_7_096004	M00045	imidazolonepropionase [EC:3.5.2.7]
130	Alistipes_sp009774895	Alistipes_sp009774895	K00014	15935	NODE_35_length_61761_cov_7_096004	M00022	shikimate dehydrogenase [EC:1.1.1.25]
131	Alistipes_sp009774895	Alistipes_sp009774895	K00800	18555	NODE_54_length_52269_cov_8_164247	M00022	3-phosphoshikimate 1-carboxyvinyltransferase [EC:2.5.1.19]
132	Alistipes_sp009774895	Alistipes_sp009774895	K03786	17572	NODE_1455_length_10192_cov_7_470948	M00022	3-dehydroquinate dehydratase II [EC:4.2.1.10]
133	Alistipes_sp009774895	Alistipes_sp009774895	K00891	14069	NODE_914_length_13579_cov_6_382801	M00022	shikimate kinase [EC:2.7.1.71]
134	Alistipes_sp009774895	Alistipes_sp009774895	K01736	18554	NODE_54_length_52269_cov_8_164247	M00022	chorismate synthase [EC:4.2.3.5]
135	Alistipes_sp009774895	Alistipes_sp009774895	K01735	11128	NODE_521_length_18208_cov_7_240236	M00022	3-dehydroquinate synthase [EC:4.2.3.4]
136	Alistipes_sp009774895	Alistipes_sp009774895	K04516	140	NODE_1907_length_8556_cov_6_300200	M00024,M00025	chorismate mutase [EC:5.4.99.5]
137	Alistipes_sp009774895	Alistipes_sp009774895	K12373	9418	NODE_457_length_19557_cov_8_118347	M00079	hexosaminidase [EC:3.2.1.52]
138	Alistipes_sp009774895	Alistipes_sp009774895	K12373	1308	NODE_178_length_32309_cov_8_518509	M00079	hexosaminidase [EC:3.2.1.52]
139	Alistipes_sp009774895	Alistipes_sp009774895	K02527	14513	NODE_1_length_146572_cov_8_806255	M00060,M00866	3-deoxy-D-manno-octulosonic-acid transferase [EC:2.4.99.12 2.4.99.13 2.4.99.14 2.4.99.15]
140	Alistipes_sp009774895	Alistipes_sp009774895	K00912	19695	NODE_79_length_44168_cov_7_503820	M00060,M00866	tetraacyldisaccharide 4'-kinase [EC:2.7.1.130]
141	Alistipes_sp009774895	Alistipes_sp009774895	K00677	11617	NODE_525_length_18172_cov_7_509466	M00060,M00866	UDP-N-acetylglucosamine acyltransferase [EC:2.3.1.129]
142	Alistipes_sp009774895	Alistipes_sp009774895	K03269	14892	NODE_5_length_114957_cov_9_480653	M00060,M00866	UDP-2,3-diacylglucosamine hydrolase [EC:3.6.1.54]
143	Alistipes_sp009774895	Alistipes_sp009774895	K02517	1302	NODE_178_length_32309_cov_8_518509	M00060,M00866	Kdo2-lipid IVA lauroyltransferase/acyltransferase [EC:2.3.1.241 2.3.1.-]
144	Alistipes_sp009774895	Alistipes_sp009774895	K00748	18038	NODE_52_length_52524_cov_9_748633	M00060,M00866	lipid-A-disaccharide synthase [EC:2.4.1.182]
145	Alistipes_sp009774895	Alistipes_sp009774895	K02536	15609	NODE_32_length_63147_cov_7_072973	M00060,M00866	UDP-3-O-[3-hydroxymyristoyl] glucosamine N-acyltransferase [EC:2.3.1.191]
146	Alistipes_sp009774895	Alistipes_sp009774895	K06041	2798	NODE_207_length_30329_cov_8_180881	M00063	arabinose-5-phosphate isomerase [EC:5.3.1.13]
147	Alistipes_sp009774895	Alistipes_sp009774895	K03270	2331	NODE_185_length_31624_cov_10_361177	M00063	3-deoxy-D-manno-octulosonate 8-phosphate phosphatase (KDO 8-P phosphatase) [EC:3.1.3.45]
148	Alistipes_sp009774895	Alistipes_sp009774895	K00979	2800	NODE_207_length_30329_cov_8_180881	M00063	3-deoxy-manno-octulosonate cytidylyltransferase (CMP-KDO synthetase) [EC:2.7.7.38]
149	Alistipes_sp009774895	Alistipes_sp009774895	K01627	2799	NODE_207_length_30329_cov_8_180881	M00063	2-dehydro-3-deoxyphosphooctonate aldolase (KDO 8-P synthase) [EC:2.5.1.55]
150	Alistipes_sp009774895	Alistipes_sp009774895	K03150	14883	NODE_5_length_114957_cov_9_480653	M00127	2-iminoacetate synthase [EC:4.1.99.19]
151	Alistipes_sp009774895	Alistipes_sp009774895	K00946	14424	NODE_1_length_146572_cov_8_806255	M00127,M00895,M00896	thiamine-monophosphate kinase [EC:2.7.4.16]
152	Alistipes_sp009774895	Alistipes_sp009774895	K00949	9991	NODE_460_length_19508_cov_8_266283	M00897,M00898	thiamine pyrophosphokinase [EC:2.7.6.2]
153	Alistipes_sp009774895	Alistipes_sp009774895	K14652	19711	NODE_1700_length_9267_cov_6_688341	M00125,M00840	3,4-dihydroxy 2-butanone 4-phosphate synthase / GTP cyclohydrolase II [EC:4.1.99.12 3.5.4.25]
154	Alistipes_sp009774895	Alistipes_sp009774895	K01497	19711	NODE_1700_length_9267_cov_6_688341	M00125,M00911	GTP cyclohydrolase II [EC:3.5.4.25]
155	Alistipes_sp009774895	Alistipes_sp009774895	K00793	4088	NODE_255_length_26657_cov_7_867754	M00125,M00911	riboflavin synthase [EC:2.5.1.9]
156	Alistipes_sp009774895	Alistipes_sp009774895	K11753	18520	NODE_54_length_52269_cov_8_164247	M00125	riboflavin kinase / FMN adenylyltransferase [EC:2.7.1.26 2.7.7.2]
157	Alistipes_sp009774895	Alistipes_sp009774895	K11753	15942	NODE_35_length_61761_cov_7_096004	M00125	riboflavin kinase / FMN adenylyltransferase [EC:2.7.1.26 2.7.7.2]
158	Alistipes_sp009774895	Alistipes_sp009774895	K03474	2805	NODE_207_length_30329_cov_8_180881	M00124	pyridoxine 5-phosphate synthase [EC:2.6.99.2]
159	Alistipes_sp009774895	Alistipes_sp009774895	K00097	14908	NODE_5_length_114957_cov_9_480653	M00124	4-hydroxythreonine-4-phosphate dehydrogenase [EC:1.1.1.262]
160	Alistipes_sp009774895	Alistipes_sp009774895	K03473	17549	NODE_48_length_53782_cov_8_950453	M00124	erythronate-4-phosphate dehydrogenase [EC:1.1.1.290]
161	Alistipes_sp009774895	Alistipes_sp009774895	K00278	14501	NODE_1_length_146572_cov_8_806255	M00115	L-aspartate oxidase [EC:1.4.3.16]
162	Alistipes_sp009774895	Alistipes_sp009774895	K03517	2813	NODE_2760_length_6709_cov_8_556057	M00115	quinolinate synthase [EC:2.5.1.72]
163	Alistipes_sp009774895	Alistipes_sp009774895	K00969	17092	NODE_41_length_58418_cov_7_187345	M00115,M00912	nicotinate-nucleotide adenylyltransferase [EC:2.7.7.18]
164	Alistipes_sp009774895	Alistipes_sp009774895	K00767	16577	NODE_1293_length_11016_cov_6_881033	M00115,M00912	nicotinate-nucleotide pyrophosphorylase (carboxylating) [EC:2.4.2.19]
165	Alistipes_sp009774895	Alistipes_sp009774895	K01950	6265	NODE_301_length_24670_cov_7_903961	M00115,M00912	NAD+ synthase (glutamine-hydrolysing) [EC:6.3.5.1]
166	Alistipes_sp009774895	Alistipes_sp009774895	K01918	19704	NODE_79_length_44168_cov_7_503820	M00119,M00913	pantoate--beta-alanine ligase [EC:6.3.2.1]
167	Alistipes_sp009774895	Alistipes_sp009774895	K01579	19703	NODE_79_length_44168_cov_7_503820	M00119	aspartate 1-decarboxylase [EC:4.1.1.11]
168	Alistipes_sp009774895	Alistipes_sp009774895	K00606	3717	NODE_224_length_28757_cov_7_778064	M00119,M00913,M00914	3-methyl-2-oxobutanoate hydroxymethyltransferase [EC:2.1.2.11]
169	Alistipes_sp009774895	Alistipes_sp009774895	K03525	3236	NODE_218_length_29263_cov_8_224219	M00120	type III pantothenate kinase [EC:2.7.1.33]
170	Alistipes_sp009774895	Alistipes_sp009774895	K13038	15267	NODE_31_length_65208_cov_9_345019	M00120,M00914	phosphopantothenoylcysteine decarboxylase / phosphopantothenate---cysteine ligase [EC:4.1.1.36 6.3.2.5]
171	Alistipes_sp009774895	Alistipes_sp009774895	K00954	15608	NODE_32_length_63147_cov_7_072973	M00120	pantetheine-phosphate adenylyltransferase [EC:2.7.7.3]
172	Alistipes_sp009774895	Alistipes_sp009774895	K00859	4481	NODE_263_length_26288_cov_7_226470	M00120	dephospho-CoA kinase [EC:2.7.1.24]
173	Alistipes_sp009774895	Alistipes_sp009774895	K01012	14882	NODE_5_length_114957_cov_9_480653	M00123,M00573,M00577	biotin synthase [EC:2.8.1.6]
174	Alistipes_sp009774895	Alistipes_sp009774895	K03644	18079	NODE_52_length_52524_cov_9_748633	M00881,M00882,M00883,M00884	lipoyl synthase [EC:2.8.1.8]
175	Alistipes_sp009774895	Alistipes_sp009774895	K03801	18080	NODE_52_length_52524_cov_9_748633	M00881	lipoyl(octanoyl) transferase [EC:2.3.1.181]
176	Alistipes_sp009774895	Alistipes_sp009774895	K23735	18080	NODE_52_length_52524_cov_9_748633	M00882,M00883	lipoyl(octanoyl) transferase 2 [EC:2.3.1.181]
177	Alistipes_sp009774895	Alistipes_sp009774895	K01633	14065	NODE_914_length_13579_cov_6_382801	M00126,M00840	7,8-dihydroneopterin aldolase/epimerase/oxygenase [EC:4.1.2.25 5.1.99.8 1.13.11.81]
178	Alistipes_sp009774895	Alistipes_sp009774895	K11754	18078	NODE_52_length_52524_cov_9_748633	M00126,M00841	dihydrofolate synthase / folylpolyglutamate synthase [EC:6.3.2.12 6.3.2.17]
179	Alistipes_sp009774895	Alistipes_sp009774895	K01495	2342	NODE_185_length_31624_cov_10_361177	M00126,M00841,M00842,M00843	GTP cyclohydrolase IA [EC:3.5.4.16]
180	Alistipes_sp009774895	Alistipes_sp009774895	K00950	1803	NODE_183_length_31787_cov_9_376749	M00126	2-amino-4-hydroxy-6-hydroxymethyldihydropteridine diphosphokinase [EC:2.7.6.3]
181	Alistipes_sp009774895	Alistipes_sp009774895	K01077	1312	NODE_178_length_32309_cov_8_518509	M00126	alkaline phosphatase [EC:3.1.3.1]
182	Alistipes_sp009774895	Alistipes_sp009774895	K01077	747	NODE_109_length_39689_cov_8_252309	M00126	alkaline phosphatase [EC:3.1.3.1]
183	Alistipes_sp009774895	Alistipes_sp009774895	K00796	4482	NODE_263_length_26288_cov_7_226470	M00126	dihydropteroate synthase [EC:2.5.1.15]
184	Alistipes_sp009774895	Alistipes_sp009774895	K00287	14890	NODE_5_length_114957_cov_9_480653	M00126,M00840	dihydrofolate reductase [EC:1.5.1.3]
185	Alistipes_sp009774895	Alistipes_sp009774895	K22391	15949	NODE_1266_length_11105_cov_8_618190	M00126	GTP cyclohydrolase I [EC:3.5.4.16]
186	Alistipes_sp009774895	Alistipes_sp009774895	K01737	12922	NODE_738_length_15155_cov_9_746954	M00842,M00843	6-pyruvoyltetrahydropterin/6-carboxytetrahydropterin synthase [EC:4.2.3.12 4.1.2.50]
187	Alistipes_sp009774895	Alistipes_sp009774895	K01500	18569	NODE_1534_length_9885_cov_6_611801	M00140	methenyltetrahydrofolate cyclohydrolase [EC:3.5.4.9]
188	Alistipes_sp009774895	Alistipes_sp009774895	K01719	90	NODE_89_length_42974_cov_9_696335	M00846,M00868,M00121,M00926	uroporphyrinogen-III synthase [EC:4.2.1.75]
189	Alistipes_sp009774895	Alistipes_sp009774895	K01885	9997	NODE_460_length_19508_cov_8_266283	M00121	glutamyl-tRNA synthetase [EC:6.1.1.17]
190	Alistipes_sp009774895	Alistipes_sp009774895	K02495	14493	NODE_1_length_146572_cov_8_806255	M00121	oxygen-independent coproporphyrinogen III oxidase [EC:1.3.98.3]
191	Alistipes_sp009774895	Alistipes_sp009774895	K03183	14458	NODE_1_length_146572_cov_8_806255	M00117,M00116	demethylmenaquinone methyltransferase / 2-methoxy-6-polyprenyl-1,4-benzoquinol methylase [EC:2.1.1.163 2.1.1.201]
192	Alistipes_sp009774895	Alistipes_sp009774895	K03179	751	NODE_2024_length_8237_cov_8_348937	M00117	4-hydroxybenzoate polyprenyltransferase [EC:2.5.1.39]
193	Alistipes_sp009774895	Alistipes_sp009774895	K03186	17541	NODE_48_length_53782_cov_8_950453	M00117	flavin prenyltransferase [EC:2.5.1.129]
194	Alistipes_sp009774895	Alistipes_sp009774895	K03182	10572	NODE_474_length_19207_cov_7_797567	M00117	4-hydroxy-3-polyprenylbenzoate decarboxylase [EC:4.1.1.98]
195	Alistipes_sp009774895	Alistipes_sp009774895	K02548	15580	NODE_32_length_63147_cov_7_072973	M00116	1,4-dihydroxy-2-naphthoate polyprenyltransferase [EC:2.5.1.74]
196	Alistipes_sp009774895	Alistipes_sp009774895	K11784	15594	NODE_32_length_63147_cov_7_072973	M00930,M00931	cyclic dehypoxanthinyl futalosine synthase [EC:1.21.98.1]
197	Alistipes_sp009774895	Alistipes_sp009774895	K11783	17539	NODE_48_length_53782_cov_8_950453	M00930	futalosine hydrolase [EC:3.2.2.26]
198	Alistipes_sp009774895	Alistipes_sp009774895	K11782	2315	NODE_185_length_31624_cov_10_361177	M00930,M00931	chorismate dehydratase [EC:4.2.1.151]
199	Alistipes_sp009774895	Alistipes_sp009774895	K18285	14949	NODE_5_length_114957_cov_9_480653	M00930,M00931	aminodeoxyfutalosine synthase [EC:2.5.1.120]
200	Alistipes_sp009774895	Alistipes_sp009774895	K11785	17538	NODE_48_length_53782_cov_8_950453	M00930,M00931	1,4-dihydroxy-6-naphthoate synthase [EC:1.14.-.-]
201	Alistipes_sp009774895	Alistipes_sp009774895	K20810	1796	NODE_183_length_31787_cov_9_376749	M00930	aminodeoxyfutalosine deaminase [EC:3.5.4.40]
202	Alistipes_sp009774895	Alistipes_sp009774895	K01662	738	NODE_109_length_39689_cov_8_252309	M00096	1-deoxy-D-xylulose-5-phosphate synthase [EC:2.2.1.7]
203	Alistipes_sp009774895	Alistipes_sp009774895	K00099	4097	NODE_255_length_26657_cov_7_867754	M00096	1-deoxy-D-xylulose-5-phosphate reductoisomerase [EC:1.1.1.267]
204	Alistipes_sp009774895	Alistipes_sp009774895	K00991	19700	NODE_79_length_44168_cov_7_503820	M00096	2-C-methyl-D-erythritol 4-phosphate cytidylyltransferase [EC:2.7.7.60]
205	Alistipes_sp009774895	Alistipes_sp009774895	K00919	8320	NODE_385_length_21468_cov_6_851072	M00096	4-diphosphocytidyl-2-C-methyl-D-erythritol kinase [EC:2.7.1.148]
206	Alistipes_sp009774895	Alistipes_sp009774895	K03526	14473	NODE_1_length_146572_cov_8_806255	M00096	(E)-4-hydroxy-3-methylbut-2-enyl-diphosphate synthase [EC:1.17.7.1 1.17.7.3]
207	Alistipes_sp009774895	Alistipes_sp009774895	K01770	16558	NODE_39_length_60036_cov_7_418116	M00096	2-C-methyl-D-erythritol 2,4-cyclodiphosphate synthase [EC:4.6.1.12]
208	Alistipes_sp009774895	Alistipes_sp009774895	K03527	95	NODE_89_length_42974_cov_9_696335	M00096	4-hydroxy-3-methylbut-2-en-1-yl diphosphate reductase [EC:1.17.7.4]
209	Alistipes_sp009774895	Alistipes_sp009774895	K01790	7016	NODE_332_length_23466_cov_6_985690	M00793	dTDP-4-dehydrorhamnose 3,5-epimerase [EC:5.1.3.13]
210	Alistipes_sp009774895	Alistipes_sp009774895	K01710	7019	NODE_332_length_23466_cov_6_985690	M00793	dTDP-glucose 4,6-dehydratase [EC:4.2.1.46]
211	Alistipes_sp009774895	Alistipes_sp009774895	K00973	7014	NODE_332_length_23466_cov_6_985690	M00793	glucose-1-phosphate thymidylyltransferase [EC:2.7.7.24]
212	Alistipes_sp009774895	Alistipes_sp009774895	K00067	7017	NODE_332_length_23466_cov_6_985690	M00793	dTDP-4-dehydrorhamnose reductase [EC:1.1.1.133]
213	Alistipes_sp009774895	Alistipes_sp009774895	K00588	17058	NODE_41_length_58418_cov_7_187345	M00039	caffeoyl-CoA O-methyltransferase [EC:2.1.1.104]
214	Alistipes_sp009774895	Alistipes_sp009774895	K02078	14510	NODE_1_length_146572_cov_8_806255	M00848	acyl carrier protein
215	Alistipes_sp009774895	Alistipes_sp009774895	K01055	17558	NODE_48_length_53782_cov_8_950453	M00568	3-oxoadipate enol-lactonase [EC:3.1.1.24]
216	Alistipes_sp009774895	Alistipes_sp009774895	K12340	12073	NODE_624_length_16710_cov_7_657760	M00575,M00696,M00697	outer membrane protein
217	Alistipes_sp009774895	Alistipes_sp009774895	K12340	13698	NODE_910_length_13644_cov_7_938553	M00575,M00696,M00697	outer membrane protein
218	Alistipes_sp009774895	Alistipes_sp009774895	K12340	3707	NODE_224_length_28757_cov_7_778064	M00575,M00696,M00697	outer membrane protein
219	Alistipes_sp009774895	Alistipes_sp009774895	K12340	15903	NODE_35_length_61761_cov_7_096004	M00575,M00696,M00697	outer membrane protein
220	Alistipes_sp009774895	Alistipes_sp009774895	K18353	4813	NODE_280_length_25512_cov_12_716345	M00651	vancomycin resistance protein VanJ
221	Alistipes_sp009774895	Alistipes_sp009774895	K03585	753	NODE_2024_length_8237_cov_8_348937	M00718	membrane fusion protein, multidrug efflux system
222	Alistipes_sp009774895	Alistipes_sp009774895	K03585	3708	NODE_224_length_28757_cov_7_778064	M00718	membrane fusion protein, multidrug efflux system
223	Alistipes_sp009774895	Alistipes_sp009774895	K03585	12071	NODE_624_length_16710_cov_7_657760	M00718	membrane fusion protein, multidrug efflux system
224	Alistipes_sp009774895	Alistipes_sp009774895	K18908	16532	NODE_39_length_60036_cov_7_418116	M00705	multidrug efflux pump
225	Alistipes_sp009774895	Alistipes_sp009774895	K13993	12508	NODE_649_length_16368_cov_9_030773	None	HSP20 family protein
226	Alistipes_sp009774895	Alistipes_sp009774895	K01881	12517	NODE_649_length_16368_cov_9_030773	None	prolyl-tRNA synthetase [EC:6.1.1.15]
227	Alistipes_sp009774895	Alistipes_sp009774895	K15789	12514	NODE_649_length_16368_cov_9_030773	None	threonine 3-dehydrogenase [EC:1.1.1.103]
228	Alistipes_sp009774895	Alistipes_sp009774895	K06076	13699	NODE_910_length_13644_cov_7_938553	None	long-chain fatty acid transport protein
229	Alistipes_sp009774895	Alistipes_sp009774895	K06076	12518	NODE_649_length_16368_cov_9_030773	None	long-chain fatty acid transport protein
230	Alistipes_sp009774895	Alistipes_sp009774895	K07114	716	NODE_109_length_39689_cov_8_252309	None	Ca-activated chloride channel homolog
231	Alistipes_sp009774895	Alistipes_sp009774895	K07114	717	NODE_109_length_39689_cov_8_252309	None	Ca-activated chloride channel homolog
232	Alistipes_sp009774895	Alistipes_sp009774895	K06187	730	NODE_109_length_39689_cov_8_252309	None	recombination protein RecR
233	Alistipes_sp009774895	Alistipes_sp009774895	K03098	737	NODE_109_length_39689_cov_8_252309	None	apolipoprotein D and lipocalin family protein
234	Alistipes_sp009774895	Alistipes_sp009774895	K03924	721	NODE_109_length_39689_cov_8_252309	None	MoxR-like ATPase [EC:3.6.3.-]
235	Alistipes_sp009774895	Alistipes_sp009774895	K02838	741	NODE_109_length_39689_cov_8_252309	None	ribosome recycling factor
236	Alistipes_sp009774895	Alistipes_sp009774895	K02199	15252	NODE_31_length_65208_cov_9_345019	None	cytochrome c biogenesis protein CcmG, thiol:disulfide interchange protein DsbE
237	Alistipes_sp009774895	Alistipes_sp009774895	K02199	740	NODE_109_length_39689_cov_8_252309	None	cytochrome c biogenesis protein CcmG, thiol:disulfide interchange protein DsbE
238	Alistipes_sp009774895	Alistipes_sp009774895	K06881	729	NODE_109_length_39689_cov_8_252309	None	bifunctional oligoribonuclease and PAP phosphatase NrnA [EC:3.1.3.7 3.1.13.3]
239	Alistipes_sp009774895	Alistipes_sp009774895	K03657	728	NODE_109_length_39689_cov_8_252309	None	DNA helicase II / ATP-dependent DNA helicase PcrA [EC:3.6.4.12]
240	Alistipes_sp009774895	Alistipes_sp009774895	K10773	727	NODE_109_length_39689_cov_8_252309	None	endonuclease III [EC:4.2.99.18]
241	Alistipes_sp009774895	Alistipes_sp009774895	K01752	744	NODE_109_length_39689_cov_8_252309	None	L-serine dehydratase [EC:4.3.1.17]
242	Alistipes_sp009774895	Alistipes_sp009774895	K18954	715	NODE_109_length_39689_cov_8_252309	None	AraC family transcriptional regulator, transcriptional activator of pobA
243	Alistipes_sp009774895	Alistipes_sp009774895	K18954	752	NODE_2024_length_8237_cov_8_348937	None	AraC family transcriptional regulator, transcriptional activator of pobA
244	Alistipes_sp009774895	Alistipes_sp009774895	K18954	15251	NODE_31_length_65208_cov_9_345019	None	AraC family transcriptional regulator, transcriptional activator of pobA
245	Alistipes_sp009774895	Alistipes_sp009774895	K18954	8919	NODE_19866_length_1688_cov_6_116350	None	AraC family transcriptional regulator, transcriptional activator of pobA
246	Alistipes_sp009774895	Alistipes_sp009774895	K18954	14490	NODE_1_length_146572_cov_8_806255	None	AraC family transcriptional regulator, transcriptional activator of pobA
247	Alistipes_sp009774895	Alistipes_sp009774895	K00262	750	NODE_109_length_39689_cov_8_252309	None	glutamate dehydrogenase (NADP+) [EC:1.4.1.4]
248	Alistipes_sp009774895	Alistipes_sp009774895	K01190	746	NODE_109_length_39689_cov_8_252309	None	beta-galactosidase [EC:3.2.1.23]
249	Alistipes_sp009774895	Alistipes_sp009774895	K01190	14475	NODE_1_length_146572_cov_8_806255	None	beta-galactosidase [EC:3.2.1.23]
250	Alistipes_sp009774895	Alistipes_sp009774895	K03575	19694	NODE_79_length_44168_cov_7_503820	None	A/G-specific adenine glycosylase [EC:3.2.2.31]
251	Alistipes_sp009774895	Alistipes_sp009774895	K07301	19693	NODE_79_length_44168_cov_7_503820	None	cation:H+ antiporter
252	Alistipes_sp009774895	Alistipes_sp009774895	K21472	19702	NODE_79_length_44168_cov_7_503820	None	peptidoglycan LD-endopeptidase LytH [EC:3.4.-.-]
253	Alistipes_sp009774895	Alistipes_sp009774895	K19304	16548	NODE_39_length_60036_cov_7_418116	None	murein DD-endopeptidase [EC:3.4.24.-]
254	Alistipes_sp009774895	Alistipes_sp009774895	K19304	16549	NODE_39_length_60036_cov_7_418116	None	murein DD-endopeptidase [EC:3.4.24.-]
255	Alistipes_sp009774895	Alistipes_sp009774895	K19304	19702	NODE_79_length_44168_cov_7_503820	None	murein DD-endopeptidase [EC:3.4.24.-]
256	Alistipes_sp009774895	Alistipes_sp009774895	K03305	19707	NODE_79_length_44168_cov_7_503820	None	proton-dependent oligopeptide transporter, POT family
257	Alistipes_sp009774895	Alistipes_sp009774895	K01277	19705	NODE_79_length_44168_cov_7_503820	None	dipeptidyl-peptidase III [EC:3.4.14.4]
258	Alistipes_sp009774895	Alistipes_sp009774895	K09979	19701	NODE_79_length_44168_cov_7_503820	None	uncharacterized protein
259	Alistipes_sp009774895	Alistipes_sp009774895	K03111	19697	NODE_79_length_44168_cov_7_503820	None	single-strand DNA-binding protein
260	Alistipes_sp009774895	Alistipes_sp009774895	K07238	19692	NODE_79_length_44168_cov_7_503820	None	zinc transporter, ZIP family
261	Alistipes_sp009774895	Alistipes_sp009774895	K03498	19716	NODE_1700_length_9267_cov_6_688341	None	trk system potassium uptake protein
262	Alistipes_sp009774895	Alistipes_sp009774895	K18707	19714	NODE_1700_length_9267_cov_6_688341	None	threonylcarbamoyladenosine tRNA methylthiotransferase MtaB [EC:2.8.4.5]
263	Alistipes_sp009774895	Alistipes_sp009774895	K02823	19688	NODE_79_length_44168_cov_7_503820	None	dihydroorotate dehydrogenase electron transfer subunit
264	Alistipes_sp009774895	Alistipes_sp009774895	K02823	17574	NODE_1455_length_10192_cov_7_470948	None	dihydroorotate dehydrogenase electron transfer subunit
265	Alistipes_sp009774895	Alistipes_sp009774895	K03783	19696	NODE_79_length_44168_cov_7_503820	None	purine-nucleoside phosphorylase [EC:2.4.2.1]
266	Alistipes_sp009774895	Alistipes_sp009774895	K07091	19712	NODE_1700_length_9267_cov_6_688341	None	lipopolysaccharide export system permease protein
267	Alistipes_sp009774895	Alistipes_sp009774895	K01358	2320	NODE_185_length_31624_cov_10_361177	None	ATP-dependent Clp protease, protease subunit [EC:3.4.21.92]
268	Alistipes_sp009774895	Alistipes_sp009774895	K01358	15586	NODE_32_length_63147_cov_7_072973	None	ATP-dependent Clp protease, protease subunit [EC:3.4.21.92]
269	Alistipes_sp009774895	Alistipes_sp009774895	K03215	2339	NODE_185_length_31624_cov_10_361177	None	23S rRNA (uracil1939-C5)-methyltransferase [EC:2.1.1.190]
270	Alistipes_sp009774895	Alistipes_sp009774895	K01990	2334	NODE_185_length_31624_cov_10_361177	None	ABC-2 type transport system ATP-binding protein
271	Alistipes_sp009774895	Alistipes_sp009774895	K01992	2332	NODE_185_length_31624_cov_10_361177	None	ABC-2 type transport system permease protein
272	Alistipes_sp009774895	Alistipes_sp009774895	K07058	2329	NODE_185_length_31624_cov_10_361177	None	membrane protein
273	Alistipes_sp009774895	Alistipes_sp009774895	K03088	2346	NODE_185_length_31624_cov_10_361177	None	RNA polymerase sigma-70 factor, ECF subfamily
274	Alistipes_sp009774895	Alistipes_sp009774895	K03088	7682	NODE_367_length_22214_cov_7_095672	None	RNA polymerase sigma-70 factor, ECF subfamily
275	Alistipes_sp009774895	Alistipes_sp009774895	K03088	14954	NODE_5_length_114957_cov_9_480653	None	RNA polymerase sigma-70 factor, ECF subfamily
276	Alistipes_sp009774895	Alistipes_sp009774895	K02238	2327	NODE_185_length_31624_cov_10_361177	None	competence protein ComEC
277	Alistipes_sp009774895	Alistipes_sp009774895	K01056	2337	NODE_185_length_31624_cov_10_361177	None	peptidyl-tRNA hydrolase, PTH1 family [EC:3.1.1.29]
278	Alistipes_sp009774895	Alistipes_sp009774895	K03284	2314	NODE_185_length_31624_cov_10_361177	None	magnesium transporter
279	Alistipes_sp009774895	Alistipes_sp009774895	K02428	2343	NODE_185_length_31624_cov_10_361177	None	XTP/dITP diphosphohydrolase [EC:3.6.1.66]
280	Alistipes_sp009774895	Alistipes_sp009774895	K03977	2350	NODE_2545_length_7077_cov_7_591427	None	GTPase
281	Alistipes_sp009774895	Alistipes_sp009774895	K02897	2336	NODE_185_length_31624_cov_10_361177	None	large subunit ribosomal protein L25
282	Alistipes_sp009774895	Alistipes_sp009774895	K02520	14906	NODE_5_length_114957_cov_9_480653	None	translation initiation factor IF-3
283	Alistipes_sp009774895	Alistipes_sp009774895	K02864	14865	NODE_5_length_114957_cov_9_480653	None	large subunit ribosomal protein L10
284	Alistipes_sp009774895	Alistipes_sp009774895	K06180	14947	NODE_5_length_114957_cov_9_480653	None	23S rRNA pseudouridine1911/1915/1917 synthase [EC:5.4.99.23]
285	Alistipes_sp009774895	Alistipes_sp009774895	K02867	14867	NODE_5_length_114957_cov_9_480653	None	large subunit ribosomal protein L11
286	Alistipes_sp009774895	Alistipes_sp009774895	K03589	14926	NODE_5_length_114957_cov_9_480653	None	cell division protein FtsQ
287	Alistipes_sp009774895	Alistipes_sp009774895	K02863	14866	NODE_5_length_114957_cov_9_480653	None	large subunit ribosomal protein L1
288	Alistipes_sp009774895	Alistipes_sp009774895	K02687	14944	NODE_5_length_114957_cov_9_480653	None	ribosomal protein L11 methyltransferase [EC:2.1.1.-]
289	Alistipes_sp009774895	Alistipes_sp009774895	K06153	14914	NODE_5_length_114957_cov_9_480653	None	undecaprenyl-diphosphatase [EC:3.6.1.27]
290	Alistipes_sp009774895	Alistipes_sp009774895	K03177	14915	NODE_5_length_114957_cov_9_480653	None	tRNA pseudouridine55 synthase [EC:5.4.99.25]
291	Alistipes_sp009774895	Alistipes_sp009774895	K01372	14920	NODE_5_length_114957_cov_9_480653	None	bleomycin hydrolase [EC:3.4.22.40]
292	Alistipes_sp009774895	Alistipes_sp009774895	K22024	14908	NODE_5_length_114957_cov_9_480653	None	4-phospho-D-threonate 3-dehydrogenase / 4-phospho-D-erythronate 3-dehydrogenase [EC:1.1.1.408 1.1.1.409]
293	Alistipes_sp009774895	Alistipes_sp009774895	K02242	14931	NODE_5_length_114957_cov_9_480653	None	competence protein ComFC
294	Alistipes_sp009774895	Alistipes_sp009774895	K03073	14869	NODE_5_length_114957_cov_9_480653	None	preprotein translocase subunit SecE
295	Alistipes_sp009774895	Alistipes_sp009774895	K18122	14859	NODE_5_length_114957_cov_9_480653	None	4-hydroxybutyrate CoA-transferase [EC:2.8.3.-]
296	Alistipes_sp009774895	Alistipes_sp009774895	K18122	11612	NODE_525_length_18172_cov_7_509466	None	4-hydroxybutyrate CoA-transferase [EC:2.8.3.-]
297	Alistipes_sp009774895	Alistipes_sp009774895	K00180	14857	NODE_5_length_114957_cov_9_480653	None	indolepyruvate ferredoxin oxidoreductase, beta subunit [EC:1.2.7.8]
298	Alistipes_sp009774895	Alistipes_sp009774895	K01868	14907	NODE_5_length_114957_cov_9_480653	None	threonyl-tRNA synthetase [EC:6.1.1.3]
299	Alistipes_sp009774895	Alistipes_sp009774895	K07560	14934	NODE_5_length_114957_cov_9_480653	None	D-aminoacyl-tRNA deacylase [EC:3.1.1.96]
300	Alistipes_sp009774895	Alistipes_sp009774895	K00179	14856	NODE_5_length_114957_cov_9_480653	None	indolepyruvate ferredoxin oxidoreductase, alpha subunit [EC:1.2.7.8]
301	Alistipes_sp009774895	Alistipes_sp009774895	K03699	3240	NODE_218_length_29263_cov_8_224219	None	putative hemolysin
302	Alistipes_sp009774895	Alistipes_sp009774895	K03699	14923	NODE_5_length_114957_cov_9_480653	None	putative hemolysin
303	Alistipes_sp009774895	Alistipes_sp009774895	K01924	14927	NODE_5_length_114957_cov_9_480653	None	UDP-N-acetylmuramate--alanine ligase [EC:6.3.2.8]
304	Alistipes_sp009774895	Alistipes_sp009774895	K06133	14922	NODE_5_length_114957_cov_9_480653	None	4'-phosphopantetheinyl transferase [EC:2.7.8.-]
305	Alistipes_sp009774895	Alistipes_sp009774895	K01489	14936	NODE_5_length_114957_cov_9_480653	None	cytidine deaminase [EC:3.5.4.5]
306	Alistipes_sp009774895	Alistipes_sp009774895	K10947	14873	NODE_5_length_114957_cov_9_480653	None	PadR family transcriptional regulator, regulatory protein PadR
307	Alistipes_sp009774895	Alistipes_sp009774895	K03046	14862	NODE_5_length_114957_cov_9_480653	None	DNA-directed RNA polymerase subunit beta' [EC:2.7.7.6]
308	Alistipes_sp009774895	Alistipes_sp009774895	K02358	14870	NODE_5_length_114957_cov_9_480653	None	elongation factor Tu
309	Alistipes_sp009774895	Alistipes_sp009774895	K07221	14942	NODE_5_length_114957_cov_9_480653	None	phosphate-selective porin OprO and OprP
310	Alistipes_sp009774895	Alistipes_sp009774895	K04066	14932	NODE_5_length_114957_cov_9_480653	None	primosomal protein N' (replication factor Y) (superfamily II helicase) [EC:3.6.4.-]
311	Alistipes_sp009774895	Alistipes_sp009774895	K02601	14868	NODE_5_length_114957_cov_9_480653	None	transcription termination/antitermination protein NusG
312	Alistipes_sp009774895	Alistipes_sp009774895	K02563	14928	NODE_5_length_114957_cov_9_480653	None	UDP-N-acetylglucosamine--N-acetylmuramyl-(pentapeptide) pyrophosphoryl-undecaprenol N-acetylglucosamine transferase [EC:2.4.1.227]
313	Alistipes_sp009774895	Alistipes_sp009774895	K09811	14912	NODE_5_length_114957_cov_9_480653	None	cell division transport system permease protein
314	Alistipes_sp009774895	Alistipes_sp009774895	K02429	9986	NODE_460_length_19508_cov_8_266283	None	MFS transporter, FHS family, L-fucose permease
315	Alistipes_sp009774895	Alistipes_sp009774895	K02429	14901	NODE_5_length_114957_cov_9_480653	None	MFS transporter, FHS family, L-fucose permease
316	Alistipes_sp009774895	Alistipes_sp009774895	K07391	14929	NODE_5_length_114957_cov_9_480653	None	magnesium chelatase family protein
317	Alistipes_sp009774895	Alistipes_sp009774895	K22844	14878	NODE_5_length_114957_cov_9_480653	None	glucosyl-dolichyl phosphate glucuronosyltransferase [EC:2.4.1.356]
318	Alistipes_sp009774895	Alistipes_sp009774895	K07568	14500	NODE_1_length_146572_cov_8_806255	None	S-adenosylmethionine:tRNA ribosyltransferase-isomerase [EC:2.4.99.17]
319	Alistipes_sp009774895	Alistipes_sp009774895	K07568	14916	NODE_5_length_114957_cov_9_480653	None	S-adenosylmethionine:tRNA ribosyltransferase-isomerase [EC:2.4.99.17]
320	Alistipes_sp009774895	Alistipes_sp009774895	K03531	14924	NODE_5_length_114957_cov_9_480653	None	cell division protein FtsZ
321	Alistipes_sp009774895	Alistipes_sp009774895	K03043	14863	NODE_5_length_114957_cov_9_480653	None	DNA-directed RNA polymerase subunit beta [EC:2.7.7.6]
322	Alistipes_sp009774895	Alistipes_sp009774895	K04763	14945	NODE_5_length_114957_cov_9_480653	None	integrase/recombinase XerD
323	Alistipes_sp009774895	Alistipes_sp009774895	K04763	5519	NODE_298_length_24846_cov_9_229841	None	integrase/recombinase XerD
324	Alistipes_sp009774895	Alistipes_sp009774895	K00856	14877	NODE_5_length_114957_cov_9_480653	None	adenosine kinase [EC:2.7.1.20]
325	Alistipes_sp009774895	Alistipes_sp009774895	K02884	14940	NODE_5_length_114957_cov_9_480653	None	large subunit ribosomal protein L19
326	Alistipes_sp009774895	Alistipes_sp009774895	K03973	14872	NODE_5_length_114957_cov_9_480653	None	phage shock protein C
327	Alistipes_sp009774895	Alistipes_sp009774895	K03973	14875	NODE_5_length_114957_cov_9_480653	None	phage shock protein C
328	Alistipes_sp009774895	Alistipes_sp009774895	K07137	14897	NODE_5_length_114957_cov_9_480653	None	uncharacterized protein
329	Alistipes_sp009774895	Alistipes_sp009774895	K03584	14943	NODE_5_length_114957_cov_9_480653	None	DNA repair protein RecO (recombination protein O)
330	Alistipes_sp009774895	Alistipes_sp009774895	K03590	14925	NODE_5_length_114957_cov_9_480653	None	cell division protein FtsA
331	Alistipes_sp009774895	Alistipes_sp009774895	K02314	14930	NODE_5_length_114957_cov_9_480653	None	replicative DNA helicase [EC:3.6.4.12]
332	Alistipes_sp009774895	Alistipes_sp009774895	K03168	14919	NODE_5_length_114957_cov_9_480653	None	DNA topoisomerase I [EC:5.6.2.1]
333	Alistipes_sp009774895	Alistipes_sp009774895	K02935	14864	NODE_5_length_114957_cov_9_480653	None	large subunit ribosomal protein L7/L12
334	Alistipes_sp009774895	Alistipes_sp009774895	K01776	14070	NODE_914_length_13579_cov_6_382801	None	glutamate racemase [EC:5.1.1.3]
335	Alistipes_sp009774895	Alistipes_sp009774895	K03466	14071	NODE_914_length_13579_cov_6_382801	None	DNA segregation ATPase FtsK/SpoIIIE, S-DNA-T family
336	Alistipes_sp009774895	Alistipes_sp009774895	K01866	14064	NODE_914_length_13579_cov_6_382801	None	tyrosyl-tRNA synthetase [EC:6.1.1.1]
337	Alistipes_sp009774895	Alistipes_sp009774895	K03979	16541	NODE_39_length_60036_cov_7_418116	None	GTPase [EC:3.6.5.-]
338	Alistipes_sp009774895	Alistipes_sp009774895	K00243	16554	NODE_39_length_60036_cov_7_418116	None	uncharacterized protein
339	Alistipes_sp009774895	Alistipes_sp009774895	K07263	17056	NODE_41_length_58418_cov_7_187345	None	zinc protease [EC:3.4.24.-]
340	Alistipes_sp009774895	Alistipes_sp009774895	K07263	16545	NODE_39_length_60036_cov_7_418116	None	zinc protease [EC:3.4.24.-]
341	Alistipes_sp009774895	Alistipes_sp009774895	K07263	19140	NODE_1594_length_9673_cov_7_883344	None	zinc protease [EC:3.4.24.-]
342	Alistipes_sp009774895	Alistipes_sp009774895	K07263	18548	NODE_54_length_52269_cov_8_164247	None	zinc protease [EC:3.4.24.-]
343	Alistipes_sp009774895	Alistipes_sp009774895	K03978	16560	NODE_39_length_60036_cov_7_418116	None	GTP-binding protein
344	Alistipes_sp009774895	Alistipes_sp009774895	K07271	16563	NODE_39_length_60036_cov_7_418116	None	lipopolysaccharide cholinephosphotransferase [EC:2.7.8.-]
345	Alistipes_sp009774895	Alistipes_sp009774895	K09760	16526	NODE_39_length_60036_cov_7_418116	None	DNA recombination protein RmuC
346	Alistipes_sp009774895	Alistipes_sp009774895	K03701	16556	NODE_39_length_60036_cov_7_418116	None	excinuclease ABC subunit A
347	Alistipes_sp009774895	Alistipes_sp009774895	K03701	17055	NODE_41_length_58418_cov_7_187345	None	excinuclease ABC subunit A
348	Alistipes_sp009774895	Alistipes_sp009774895	K01883	16531	NODE_39_length_60036_cov_7_418116	None	cysteinyl-tRNA synthetase [EC:6.1.1.16]
349	Alistipes_sp009774895	Alistipes_sp009774895	K19997	16561	NODE_39_length_60036_cov_7_418116	None	GlcNAc-P-P-Und epimerase [EC:5.1.3.26]
350	Alistipes_sp009774895	Alistipes_sp009774895	K01270	16539	NODE_39_length_60036_cov_7_418116	None	dipeptidase D [EC:3.4.13.-]
351	Alistipes_sp009774895	Alistipes_sp009774895	K01270	9989	NODE_460_length_19508_cov_8_266283	None	dipeptidase D [EC:3.4.13.-]
352	Alistipes_sp009774895	Alistipes_sp009774895	K01875	16538	NODE_39_length_60036_cov_7_418116	None	seryl-tRNA synthetase [EC:6.1.1.11]
353	Alistipes_sp009774895	Alistipes_sp009774895	K02836	16534	NODE_39_length_60036_cov_7_418116	None	peptide chain release factor 2
354	Alistipes_sp009774895	Alistipes_sp009774895	K09793	16546	NODE_39_length_60036_cov_7_418116	None	uncharacterized protein
355	Alistipes_sp009774895	Alistipes_sp009774895	K01872	16550	NODE_39_length_60036_cov_7_418116	None	alanyl-tRNA synthetase [EC:6.1.1.7]
356	Alistipes_sp009774895	Alistipes_sp009774895	K00661	16536	NODE_39_length_60036_cov_7_418116	None	maltose O-acetyltransferase [EC:2.3.1.79]
357	Alistipes_sp009774895	Alistipes_sp009774895	K16870	16570	NODE_39_length_60036_cov_7_418116	None	N-acetylglucosaminyl-diphospho-decaprenol L-rhamnosyltransferase [EC:2.4.1.289]
358	Alistipes_sp009774895	Alistipes_sp009774895	K16870	1301	NODE_178_length_32309_cov_8_518509	None	N-acetylglucosaminyl-diphospho-decaprenol L-rhamnosyltransferase [EC:2.4.1.289]
359	Alistipes_sp009774895	Alistipes_sp009774895	K21572	1316	NODE_178_length_32309_cov_8_518509	None	starch-binding outer membrane protein, SusD/RagB family
360	Alistipes_sp009774895	Alistipes_sp009774895	K21572	19103	NODE_60_length_49498_cov_7_333252	None	starch-binding outer membrane protein, SusD/RagB family
361	Alistipes_sp009774895	Alistipes_sp009774895	K21573	1317	NODE_178_length_32309_cov_8_518509	None	TonB-dependent starch-binding outer membrane protein SusC
362	Alistipes_sp009774895	Alistipes_sp009774895	K21573	19102	NODE_60_length_49498_cov_7_333252	None	TonB-dependent starch-binding outer membrane protein SusC
363	Alistipes_sp009774895	Alistipes_sp009774895	K00604	1318	NODE_2470_length_7252_cov_6_143115	None	methionyl-tRNA formyltransferase [EC:2.1.2.9]
364	Alistipes_sp009774895	Alistipes_sp009774895	K07056	1304	NODE_178_length_32309_cov_8_518509	None	16S rRNA (cytidine1402-2'-O)-methyltransferase [EC:2.1.1.198]
365	Alistipes_sp009774895	Alistipes_sp009774895	K07056	4819	NODE_280_length_25512_cov_12_716345	None	16S rRNA (cytidine1402-2'-O)-methyltransferase [EC:2.1.1.198]
366	Alistipes_sp009774895	Alistipes_sp009774895	K06147	10563	NODE_474_length_19207_cov_7_797567	None	ATP-binding cassette, subfamily B, bacterial
367	Alistipes_sp009774895	Alistipes_sp009774895	K02970	10570	NODE_474_length_19207_cov_7_797567	None	small subunit ribosomal protein S21
368	Alistipes_sp009774895	Alistipes_sp009774895	K02237	10571	NODE_474_length_19207_cov_7_797567	None	competence protein ComEA
369	Alistipes_sp009774895	Alistipes_sp009774895	K11085	10563	NODE_474_length_19207_cov_7_797567	None	ATP-binding cassette, subfamily B, bacterial MsbA [EC:3.6.3.-]
370	Alistipes_sp009774895	Alistipes_sp009774895	K01870	10564	NODE_474_length_19207_cov_7_797567	None	isoleucyl-tRNA synthetase [EC:6.1.1.5]
371	Alistipes_sp009774895	Alistipes_sp009774895	K06204	10565	NODE_474_length_19207_cov_7_797567	None	DnaK suppressor protein
372	Alistipes_sp009774895	Alistipes_sp009774895	K02519	11613	NODE_525_length_18172_cov_7_509466	None	translation initiation factor IF-2
373	Alistipes_sp009774895	Alistipes_sp009774895	K09748	11615	NODE_525_length_18172_cov_7_509466	None	ribosome maturation factor RimP
374	Alistipes_sp009774895	Alistipes_sp009774895	K11105	11620	NODE_525_length_18172_cov_7_509466	None	potassium/hydrogen antiporter
375	Alistipes_sp009774895	Alistipes_sp009774895	K02600	11614	NODE_525_length_18172_cov_7_509466	None	transcription termination/antitermination protein NusA
376	Alistipes_sp009774895	Alistipes_sp009774895	K03574	3226	NODE_218_length_29263_cov_8_224219	None	8-oxo-dGTP diphosphatase [EC:3.6.1.55]
377	Alistipes_sp009774895	Alistipes_sp009774895	K06925	3229	NODE_218_length_29263_cov_8_224219	None	tRNA threonylcarbamoyladenosine biosynthesis protein TsaE
378	Alistipes_sp009774895	Alistipes_sp009774895	K02335	12923	NODE_738_length_15155_cov_9_746954	None	DNA polymerase I [EC:2.7.7.7]
379	Alistipes_sp009774895	Alistipes_sp009774895	K02014	15274	NODE_31_length_65208_cov_9_345019	None	iron complex outermembrane recepter protein
380	Alistipes_sp009774895	Alistipes_sp009774895	K02014	9995	NODE_460_length_19508_cov_8_266283	None	iron complex outermembrane recepter protein
381	Alistipes_sp009774895	Alistipes_sp009774895	K02014	1322	NODE_2470_length_7252_cov_6_143115	None	iron complex outermembrane recepter protein
382	Alistipes_sp009774895	Alistipes_sp009774895	K02014	18570	NODE_1534_length_9885_cov_6_611801	None	iron complex outermembrane recepter protein
383	Alistipes_sp009774895	Alistipes_sp009774895	K02014	11125	NODE_521_length_18208_cov_7_240236	None	iron complex outermembrane recepter protein
384	Alistipes_sp009774895	Alistipes_sp009774895	K02014	12924	NODE_738_length_15155_cov_9_746954	None	iron complex outermembrane recepter protein
385	Alistipes_sp009774895	Alistipes_sp009774895	K02014	16575	NODE_1293_length_11016_cov_6_881033	None	iron complex outermembrane recepter protein
386	Alistipes_sp009774895	Alistipes_sp009774895	K05515	17528	NODE_48_length_53782_cov_8_950453	None	penicillin-binding protein 2 [EC:3.4.16.4]
387	Alistipes_sp009774895	Alistipes_sp009774895	K00929	17569	NODE_1455_length_10192_cov_7_470948	None	butyrate kinase [EC:2.7.2.7]
388	Alistipes_sp009774895	Alistipes_sp009774895	K11991	17562	NODE_48_length_53782_cov_8_950453	None	tRNA(adenine34) deaminase [EC:3.5.4.33]
389	Alistipes_sp009774895	Alistipes_sp009774895	K00057	17524	NODE_48_length_53782_cov_8_950453	None	glycerol-3-phosphate dehydrogenase (NAD(P)+) [EC:1.1.1.94]
390	Alistipes_sp009774895	Alistipes_sp009774895	K02913	17553	NODE_48_length_53782_cov_8_950453	None	large subunit ribosomal protein L33
391	Alistipes_sp009774895	Alistipes_sp009774895	K02902	17552	NODE_48_length_53782_cov_8_950453	None	large subunit ribosomal protein L28
392	Alistipes_sp009774895	Alistipes_sp009774895	K02914	17533	NODE_48_length_53782_cov_8_950453	None	large subunit ribosomal protein L34
393	Alistipes_sp009774895	Alistipes_sp009774895	K03439	17563	NODE_48_length_53782_cov_8_950453	None	tRNA (guanine-N7-)-methyltransferase [EC:2.1.1.33]
394	Alistipes_sp009774895	Alistipes_sp009774895	K03772	17545	NODE_48_length_53782_cov_8_950453	None	FKBP-type peptidyl-prolyl cis-trans isomerase FkpA [EC:5.2.1.8]
395	Alistipes_sp009774895	Alistipes_sp009774895	K03570	17526	NODE_48_length_53782_cov_8_950453	None	rod shape-determining protein MreC
396	Alistipes_sp009774895	Alistipes_sp009774895	K00790	17532	NODE_48_length_53782_cov_8_950453	None	UDP-N-acetylglucosamine 1-carboxyvinyltransferase [EC:2.5.1.7]
397	Alistipes_sp009774895	Alistipes_sp009774895	K03313	17547	NODE_48_length_53782_cov_8_950453	None	Na+:H+ antiporter, NhaA family
398	Alistipes_sp009774895	Alistipes_sp009774895	K06131	17544	NODE_48_length_53782_cov_8_950453	None	cardiolipin synthase A/B [EC:2.7.8.-]
399	Alistipes_sp009774895	Alistipes_sp009774895	K06131	15271	NODE_31_length_65208_cov_9_345019	None	cardiolipin synthase A/B [EC:2.7.8.-]
400	Alistipes_sp009774895	Alistipes_sp009774895	K02356	17521	NODE_48_length_53782_cov_8_950453	None	elongation factor P
401	Alistipes_sp009774895	Alistipes_sp009774895	K02355	17537	NODE_48_length_53782_cov_8_950453	None	elongation factor G
402	Alistipes_sp009774895	Alistipes_sp009774895	K02355	101	NODE_89_length_42974_cov_9_696335	None	elongation factor G
403	Alistipes_sp009774895	Alistipes_sp009774895	K05837	17529	NODE_48_length_53782_cov_8_950453	None	rod shape determining protein RodA
404	Alistipes_sp009774895	Alistipes_sp009774895	K22278	17542	NODE_48_length_53782_cov_8_950453	None	peptidoglycan-N-acetylglucosamine deacetylase [EC:3.5.1.104]
405	Alistipes_sp009774895	Alistipes_sp009774895	K03327	14529	NODE_920_length_13490_cov_7_382508	None	multidrug resistance protein, MATE family
406	Alistipes_sp009774895	Alistipes_sp009774895	K03327	17566	NODE_48_length_53782_cov_8_950453	None	multidrug resistance protein, MATE family
407	Alistipes_sp009774895	Alistipes_sp009774895	K07387	17559	NODE_48_length_53782_cov_8_950453	None	metalloprotease [EC:3.4.24.-]
408	Alistipes_sp009774895	Alistipes_sp009774895	K03569	17525	NODE_48_length_53782_cov_8_950453	None	rod shape-determining protein MreB and related proteins
409	Alistipes_sp009774895	Alistipes_sp009774895	K03743	17551	NODE_48_length_53782_cov_8_950453	None	nicotinamide-nucleotide amidase [EC:3.5.1.42]
410	Alistipes_sp009774895	Alistipes_sp009774895	K03742	17551	NODE_48_length_53782_cov_8_950453	None	nicotinamide-nucleotide amidase [EC:3.5.1.42]
411	Alistipes_sp009774895	Alistipes_sp009774895	K00857	17531	NODE_48_length_53782_cov_8_950453	None	thymidine kinase [EC:2.7.1.21]
412	Alistipes_sp009774895	Alistipes_sp009774895	K00266	17573	NODE_1455_length_10192_cov_7_470948	None	glutamate synthase (NADPH) small chain [EC:1.4.1.13]
413	Alistipes_sp009774895	Alistipes_sp009774895	K00528	17574	NODE_1455_length_10192_cov_7_470948	None	ferredoxin/flavodoxin---NADP+ reductase [EC:1.18.1.2 1.19.1.1]
414	Alistipes_sp009774895	Alistipes_sp009774895	K18691	6257	NODE_301_length_24670_cov_7_903961	None	membrane-bound lytic murein transglycosylase F [EC:4.2.2.-]
415	Alistipes_sp009774895	Alistipes_sp009774895	K00971	6260	NODE_301_length_24670_cov_7_903961	None	mannose-1-phosphate guanylyltransferase [EC:2.7.7.13]
416	Alistipes_sp009774895	Alistipes_sp009774895	K01258	6264	NODE_301_length_24670_cov_7_903961	None	tripeptide aminopeptidase [EC:3.4.11.4]
417	Alistipes_sp009774895	Alistipes_sp009774895	K01929	6261	NODE_301_length_24670_cov_7_903961	None	UDP-N-acetylmuramoyl-tripeptide--D-alanyl-D-alanine ligase [EC:6.3.2.10]
418	Alistipes_sp009774895	Alistipes_sp009774895	K01874	6270	NODE_6013_length_3958_cov_12_196003	None	methionyl-tRNA synthetase [EC:6.1.1.10]
419	Alistipes_sp009774895	Alistipes_sp009774895	K11749	4098	NODE_255_length_26657_cov_7_867754	None	regulator of sigma E protease [EC:3.4.24.-]
420	Alistipes_sp009774895	Alistipes_sp009774895	K15460	4104	NODE_255_length_26657_cov_7_867754	None	tRNA1Val (adenine37-N6)-methyltransferase [EC:2.1.1.223]
421	Alistipes_sp009774895	Alistipes_sp009774895	K03702	4083	NODE_255_length_26657_cov_7_867754	None	excinuclease ABC subunit B
422	Alistipes_sp009774895	Alistipes_sp009774895	K04485	4099	NODE_255_length_26657_cov_7_867754	None	DNA repair protein RadA/Sms
423	Alistipes_sp009774895	Alistipes_sp009774895	K03442	4111	NODE_4187_length_5049_cov_5_847617	None	small conductance mechanosensitive channel
424	Alistipes_sp009774895	Alistipes_sp009774895	K05540	4108	NODE_4187_length_5049_cov_5_847617	None	tRNA-dihydrouridine synthase B [EC:1.-.-.-]
425	Alistipes_sp009774895	Alistipes_sp009774895	K08303	14465	NODE_1_length_146572_cov_8_806255	None	putative protease [EC:3.4.-.-]
426	Alistipes_sp009774895	Alistipes_sp009774895	K08303	4094	NODE_255_length_26657_cov_7_867754	None	putative protease [EC:3.4.-.-]
427	Alistipes_sp009774895	Alistipes_sp009774895	K13292	4086	NODE_255_length_26657_cov_7_867754	None	phosphatidylglycerol---prolipoprotein diacylglyceryl transferase [EC:2.5.1.145]
428	Alistipes_sp009774895	Alistipes_sp009774895	K03551	4090	NODE_255_length_26657_cov_7_867754	None	holliday junction DNA helicase RuvB [EC:3.6.4.12]
429	Alistipes_sp009774895	Alistipes_sp009774895	K02904	111	NODE_89_length_42974_cov_9_696335	None	large subunit ribosomal protein L29
430	Alistipes_sp009774895	Alistipes_sp009774895	K03832	3689	NODE_224_length_28757_cov_7_778064	None	periplasmic protein TonB
431	Alistipes_sp009774895	Alistipes_sp009774895	K03832	82	NODE_89_length_42974_cov_9_696335	None	periplasmic protein TonB
432	Alistipes_sp009774895	Alistipes_sp009774895	K03832	5526	NODE_5932_length_4001_cov_9_068931	None	periplasmic protein TonB
433	Alistipes_sp009774895	Alistipes_sp009774895	K08998	88	NODE_89_length_42974_cov_9_696335	None	uncharacterized protein
434	Alistipes_sp009774895	Alistipes_sp009774895	K02906	103	NODE_89_length_42974_cov_9_696335	None	large subunit ribosomal protein L3
435	Alistipes_sp009774895	Alistipes_sp009774895	K02907	122	NODE_89_length_42974_cov_9_696335	None	large subunit ribosomal protein L30
436	Alistipes_sp009774895	Alistipes_sp009774895	K02876	123	NODE_89_length_42974_cov_9_696335	None	large subunit ribosomal protein L15
437	Alistipes_sp009774895	Alistipes_sp009774895	K02874	113	NODE_89_length_42974_cov_9_696335	None	large subunit ribosomal protein L14
438	Alistipes_sp009774895	Alistipes_sp009774895	K02518	126	NODE_89_length_42974_cov_9_696335	None	translation initiation factor IF-1
439	Alistipes_sp009774895	Alistipes_sp009774895	K02965	107	NODE_89_length_42974_cov_9_696335	None	small subunit ribosomal protein S19
440	Alistipes_sp009774895	Alistipes_sp009774895	K01869	98	NODE_89_length_42974_cov_9_696335	None	leucyl-tRNA synthetase [EC:6.1.1.4]
441	Alistipes_sp009774895	Alistipes_sp009774895	K02948	129	NODE_89_length_42974_cov_9_696335	None	small subunit ribosomal protein S11
442	Alistipes_sp009774895	Alistipes_sp009774895	K02961	112	NODE_89_length_42974_cov_9_696335	None	small subunit ribosomal protein S17
443	Alistipes_sp009774895	Alistipes_sp009774895	K01265	125	NODE_89_length_42974_cov_9_696335	None	methionyl aminopeptidase [EC:3.4.11.18]
444	Alistipes_sp009774895	Alistipes_sp009774895	K02988	121	NODE_89_length_42974_cov_9_696335	None	small subunit ribosomal protein S5
445	Alistipes_sp009774895	Alistipes_sp009774895	K03076	124	NODE_89_length_42974_cov_9_696335	None	preprotein translocase subunit SecY
446	Alistipes_sp009774895	Alistipes_sp009774895	K03665	83	NODE_89_length_42974_cov_9_696335	None	GTPase
447	Alistipes_sp009774895	Alistipes_sp009774895	K03536	89	NODE_89_length_42974_cov_9_696335	None	ribonuclease P protein component [EC:3.1.26.5]
448	Alistipes_sp009774895	Alistipes_sp009774895	K13532	92	NODE_89_length_42974_cov_9_696335	None	two-component system, sporulation sensor kinase D [EC:2.7.13.3]
449	Alistipes_sp009774895	Alistipes_sp009774895	K02952	128	NODE_89_length_42974_cov_9_696335	None	small subunit ribosomal protein S13
450	Alistipes_sp009774895	Alistipes_sp009774895	K02946	102	NODE_89_length_42974_cov_9_696335	None	small subunit ribosomal protein S10
451	Alistipes_sp009774895	Alistipes_sp009774895	K16264	87	NODE_89_length_42974_cov_9_696335	None	cobalt-zinc-cadmium efflux system protein
452	Alistipes_sp009774895	Alistipes_sp009774895	K02950	99	NODE_89_length_42974_cov_9_696335	None	small subunit ribosomal protein S12
453	Alistipes_sp009774895	Alistipes_sp009774895	K02986	130	NODE_89_length_42974_cov_9_696335	None	small subunit ribosomal protein S4
454	Alistipes_sp009774895	Alistipes_sp009774895	K02992	100	NODE_89_length_42974_cov_9_696335	None	small subunit ribosomal protein S7
455	Alistipes_sp009774895	Alistipes_sp009774895	K02982	109	NODE_89_length_42974_cov_9_696335	None	small subunit ribosomal protein S3
456	Alistipes_sp009774895	Alistipes_sp009774895	K03040	131	NODE_89_length_42974_cov_9_696335	None	DNA-directed RNA polymerase subunit alpha [EC:2.7.7.6]
457	Alistipes_sp009774895	Alistipes_sp009774895	K00945	96	NODE_89_length_42974_cov_9_696335	None	CMP/dCMP kinase [EC:2.7.4.25]
458	Alistipes_sp009774895	Alistipes_sp009774895	K00945	16533	NODE_39_length_60036_cov_7_418116	None	CMP/dCMP kinase [EC:2.7.4.25]
459	Alistipes_sp009774895	Alistipes_sp009774895	K02954	116	NODE_89_length_42974_cov_9_696335	None	small subunit ribosomal protein S14
460	Alistipes_sp009774895	Alistipes_sp009774895	K07386	78	NODE_89_length_42974_cov_9_696335	None	putative endopeptidase [EC:3.4.24.-]
461	Alistipes_sp009774895	Alistipes_sp009774895	K02994	118	NODE_89_length_42974_cov_9_696335	None	small subunit ribosomal protein S8
462	Alistipes_sp009774895	Alistipes_sp009774895	K02878	110	NODE_89_length_42974_cov_9_696335	None	large subunit ribosomal protein L16
463	Alistipes_sp009774895	Alistipes_sp009774895	K02886	106	NODE_89_length_42974_cov_9_696335	None	large subunit ribosomal protein L2
464	Alistipes_sp009774895	Alistipes_sp009774895	K02892	105	NODE_89_length_42974_cov_9_696335	None	large subunit ribosomal protein L23
465	Alistipes_sp009774895	Alistipes_sp009774895	K02879	132	NODE_89_length_42974_cov_9_696335	None	large subunit ribosomal protein L17
466	Alistipes_sp009774895	Alistipes_sp009774895	K02931	115	NODE_89_length_42974_cov_9_696335	None	large subunit ribosomal protein L5
467	Alistipes_sp009774895	Alistipes_sp009774895	K02919	127	NODE_89_length_42974_cov_9_696335	None	large subunit ribosomal protein L36
468	Alistipes_sp009774895	Alistipes_sp009774895	K07322	86	NODE_89_length_42974_cov_9_696335	None	regulator of cell morphogenesis and NO signaling
469	Alistipes_sp009774895	Alistipes_sp009774895	K06941	81	NODE_89_length_42974_cov_9_696335	None	23S rRNA (adenine2503-C2)-methyltransferase [EC:2.1.1.192]
470	Alistipes_sp009774895	Alistipes_sp009774895	K02933	119	NODE_89_length_42974_cov_9_696335	None	large subunit ribosomal protein L6
471	Alistipes_sp009774895	Alistipes_sp009774895	K02890	108	NODE_89_length_42974_cov_9_696335	None	large subunit ribosomal protein L22
472	Alistipes_sp009774895	Alistipes_sp009774895	K03797	14482	NODE_1_length_146572_cov_8_806255	None	carboxyl-terminal processing protease [EC:3.4.21.102]
473	Alistipes_sp009774895	Alistipes_sp009774895	K03797	15933	NODE_35_length_61761_cov_7_096004	None	carboxyl-terminal processing protease [EC:3.4.21.102]
474	Alistipes_sp009774895	Alistipes_sp009774895	K03797	15259	NODE_31_length_65208_cov_9_345019	None	carboxyl-terminal processing protease [EC:3.4.21.102]
475	Alistipes_sp009774895	Alistipes_sp009774895	K03797	93	NODE_89_length_42974_cov_9_696335	None	carboxyl-terminal processing protease [EC:3.4.21.102]
476	Alistipes_sp009774895	Alistipes_sp009774895	K02926	104	NODE_89_length_42974_cov_9_696335	None	large subunit ribosomal protein L4
477	Alistipes_sp009774895	Alistipes_sp009774895	K02881	120	NODE_89_length_42974_cov_9_696335	None	large subunit ribosomal protein L18
478	Alistipes_sp009774895	Alistipes_sp009774895	K02895	114	NODE_89_length_42974_cov_9_696335	None	large subunit ribosomal protein L24
479	Alistipes_sp009774895	Alistipes_sp009774895	K03790	141	NODE_1907_length_8556_cov_6_300200	None	[ribosomal protein S5]-alanine N-acetyltransferase [EC:2.3.1.267]
480	Alistipes_sp009774895	Alistipes_sp009774895	K01798	4820	NODE_280_length_25512_cov_12_716345	None	Alr-MurF fusion protein [EC:5.1.1.1 6.3.2.10]
481	Alistipes_sp009774895	Alistipes_sp009774895	K12257	4479	NODE_263_length_26288_cov_7_226470	None	SecD/SecF fusion protein
482	Alistipes_sp009774895	Alistipes_sp009774895	K06142	4473	NODE_263_length_26288_cov_7_226470	None	outer membrane protein
483	Alistipes_sp009774895	Alistipes_sp009774895	K06142	2810	NODE_207_length_30329_cov_8_180881	None	outer membrane protein
484	Alistipes_sp009774895	Alistipes_sp009774895	K06142	2809	NODE_207_length_30329_cov_8_180881	None	outer membrane protein
485	Alistipes_sp009774895	Alistipes_sp009774895	K01775	4820	NODE_280_length_25512_cov_12_716345	None	alanine racemase [EC:5.1.1.1]
486	Alistipes_sp009774895	Alistipes_sp009774895	K09117	4464	NODE_263_length_26288_cov_7_226470	None	uncharacterized protein
487	Alistipes_sp009774895	Alistipes_sp009774895	K09922	4469	NODE_263_length_26288_cov_7_226470	None	uncharacterized protein
488	Alistipes_sp009774895	Alistipes_sp009774895	K03572	4815	NODE_280_length_25512_cov_12_716345	None	DNA mismatch repair protein MutL
489	Alistipes_sp009774895	Alistipes_sp009774895	K04744	4824	NODE_280_length_25512_cov_12_716345	None	LPS-assembly protein
490	Alistipes_sp009774895	Alistipes_sp009774895	K08223	4487	NODE_4323_length_4939_cov_7_179771	None	MFS transporter, FSR family, fosmidomycin resistance protein
491	Alistipes_sp009774895	Alistipes_sp009774895	K09013	4485	NODE_4323_length_4939_cov_7_179771	None	Fe-S cluster assembly ATP-binding protein
492	Alistipes_sp009774895	Alistipes_sp009774895	K01667	4811	NODE_280_length_25512_cov_12_716345	None	tryptophanase [EC:4.1.99.1]
493	Alistipes_sp009774895	Alistipes_sp009774895	K09014	4486	NODE_4323_length_4939_cov_7_179771	None	Fe-S cluster assembly protein SufB
494	Alistipes_sp009774895	Alistipes_sp009774895	K01448	4823	NODE_280_length_25512_cov_12_716345	None	N-acetylmuramoyl-L-alanine amidase [EC:3.5.1.28]
495	Alistipes_sp009774895	Alistipes_sp009774895	K03704	4826	NODE_5697_length_4113_cov_6_539182	None	cold shock protein
496	Alistipes_sp009774895	Alistipes_sp009774895	K04043	4478	NODE_263_length_26288_cov_7_226470	None	molecular chaperone DnaK
497	Alistipes_sp009774895	Alistipes_sp009774895	K09810	4483	NODE_263_length_26288_cov_7_226470	None	lipoprotein-releasing system ATP-binding protein [EC:3.6.3.-]
498	Alistipes_sp009774895	Alistipes_sp009774895	K10822	4483	NODE_263_length_26288_cov_7_226470	None	nonpolar-amino-acid-transporting ATPase [EC:7.4.2.2]
499	Alistipes_sp009774895	Alistipes_sp009774895	K10822	18556	NODE_54_length_52269_cov_8_164247	None	nonpolar-amino-acid-transporting ATPase [EC:7.4.2.2]
500	Alistipes_sp009774895	Alistipes_sp009774895	K03686	4817	NODE_280_length_25512_cov_12_716345	None	molecular chaperone DnaJ
501	Alistipes_sp009774895	Alistipes_sp009774895	K02003	4483	NODE_263_length_26288_cov_7_226470	None	putative ABC transport system ATP-binding protein
502	Alistipes_sp009774895	Alistipes_sp009774895	K02003	13694	NODE_910_length_13644_cov_7_938553	None	putative ABC transport system ATP-binding protein
503	Alistipes_sp009774895	Alistipes_sp009774895	K03282	4460	NODE_263_length_26288_cov_7_226470	None	large conductance mechanosensitive channel
504	Alistipes_sp009774895	Alistipes_sp009774895	K03687	4818	NODE_280_length_25512_cov_12_716345	None	molecular chaperone GrpE
505	Alistipes_sp009774895	Alistipes_sp009774895	K19334	4812	NODE_280_length_25512_cov_12_716345	None	biofilm protein TabA
506	Alistipes_sp009774895	Alistipes_sp009774895	K02067	4822	NODE_280_length_25512_cov_12_716345	None	phospholipid/cholesterol/gamma-HCH transport system substrate-binding protein
507	Alistipes_sp009774895	Alistipes_sp009774895	K03976	4472	NODE_263_length_26288_cov_7_226470	None	Cys-tRNA(Pro)/Cys-tRNA(Cys) deacylase [EC:3.1.1.-]
508	Alistipes_sp009774895	Alistipes_sp009774895	K07456	4821	NODE_280_length_25512_cov_12_716345	None	DNA mismatch repair protein MutS2
509	Alistipes_sp009774895	Alistipes_sp009774895	K03550	4474	NODE_263_length_26288_cov_7_226470	None	holliday junction DNA helicase RuvA [EC:3.6.4.12]
510	Alistipes_sp009774895	Alistipes_sp009774895	K01838	14962	NODE_930_length_13361_cov_7_226289	None	beta-phosphoglucomutase [EC:5.4.2.6]
511	Alistipes_sp009774895	Alistipes_sp009774895	K01838	4470	NODE_263_length_26288_cov_7_226470	None	beta-phosphoglucomutase [EC:5.4.2.6]
512	Alistipes_sp009774895	Alistipes_sp009774895	K04564	4810	NODE_280_length_25512_cov_12_716345	None	superoxide dismutase, Fe-Mn family [EC:1.15.1.1]
513	Alistipes_sp009774895	Alistipes_sp009774895	K01163	16579	NODE_1293_length_11016_cov_6_881033	None	uncharacterized protein
514	Alistipes_sp009774895	Alistipes_sp009774895	K20444	16570	NODE_39_length_60036_cov_7_418116	None	O-antigen biosynthesis protein [EC:2.4.1.-]
515	Alistipes_sp009774895	Alistipes_sp009774895	K19424	16567	NODE_39_length_60036_cov_7_418116	None	glycosyltransferase EpsF [EC:2.4.-.-]
516	Alistipes_sp009774895	Alistipes_sp009774895	K01009	16566	NODE_39_length_60036_cov_7_418116	None	L-glutamine-phosphate cytidylyltransferase [EC:2.7.7.103]
517	Alistipes_sp009774895	Alistipes_sp009774895	K04940	16564	NODE_39_length_60036_cov_7_418116	None	opine dehydrogenase [EC:1.5.1.28]
518	Alistipes_sp009774895	Alistipes_sp009774895	K07138	11126	NODE_521_length_18208_cov_7_240236	None	uncharacterized protein
519	Alistipes_sp009774895	Alistipes_sp009774895	K00346	11111	NODE_521_length_18208_cov_7_240236	None	Na+-transporting NADH:ubiquinone oxidoreductase subunit A [EC:7.2.1.1]
520	Alistipes_sp009774895	Alistipes_sp009774895	K00347	11112	NODE_521_length_18208_cov_7_240236	None	Na+-transporting NADH:ubiquinone oxidoreductase subunit B [EC:7.2.1.1]
521	Alistipes_sp009774895	Alistipes_sp009774895	K00351	11116	NODE_521_length_18208_cov_7_240236	None	Na+-transporting NADH:ubiquinone oxidoreductase subunit F [EC:7.2.1.1]
522	Alistipes_sp009774895	Alistipes_sp009774895	K00350	11115	NODE_521_length_18208_cov_7_240236	None	Na+-transporting NADH:ubiquinone oxidoreductase subunit E [EC:7.2.1.1]
523	Alistipes_sp009774895	Alistipes_sp009774895	K22132	11119	NODE_521_length_18208_cov_7_240236	None	tRNA threonylcarbamoyladenosine dehydratase
524	Alistipes_sp009774895	Alistipes_sp009774895	K00349	11114	NODE_521_length_18208_cov_7_240236	None	Na+-transporting NADH:ubiquinone oxidoreductase subunit D [EC:7.2.1.1]
525	Alistipes_sp009774895	Alistipes_sp009774895	K00348	11113	NODE_521_length_18208_cov_7_240236	None	Na+-transporting NADH:ubiquinone oxidoreductase subunit C [EC:7.2.1.1]
526	Alistipes_sp009774895	Alistipes_sp009774895	K01442	11121	NODE_521_length_18208_cov_7_240236	None	choloylglycine hydrolase [EC:3.5.1.24]
527	Alistipes_sp009774895	Alistipes_sp009774895	K03424	11118	NODE_521_length_18208_cov_7_240236	None	TatD DNase family protein [EC:3.1.21.-]
528	Alistipes_sp009774895	Alistipes_sp009774895	K03424	1783	NODE_183_length_31787_cov_9_376749	None	TatD DNase family protein [EC:3.1.21.-]
529	Alistipes_sp009774895	Alistipes_sp009774895	K02911	18068	NODE_52_length_52524_cov_9_748633	None	large subunit ribosomal protein L32
530	Alistipes_sp009774895	Alistipes_sp009774895	K07462	18081	NODE_52_length_52524_cov_9_748633	None	single-stranded-DNA-specific exonuclease [EC:3.1.-.-]
531	Alistipes_sp009774895	Alistipes_sp009774895	K03820	18077	NODE_52_length_52524_cov_9_748633	None	apolipoprotein N-acyltransferase [EC:2.3.1.269]
532	Alistipes_sp009774895	Alistipes_sp009774895	K07566	18531	NODE_54_length_52269_cov_8_164247	None	L-threonylcarbamoyladenylate synthase [EC:2.7.7.87]
533	Alistipes_sp009774895	Alistipes_sp009774895	K07566	18095	NODE_1514_length_9962_cov_6_850409	None	L-threonylcarbamoyladenylate synthase [EC:2.7.7.87]
534	Alistipes_sp009774895	Alistipes_sp009774895	K22719	18088	NODE_52_length_52524_cov_9_748633	None	murein hydrolase activator
535	Alistipes_sp009774895	Alistipes_sp009774895	K03110	18075	NODE_52_length_52524_cov_9_748633	None	fused signal recognition particle receptor
536	Alistipes_sp009774895	Alistipes_sp009774895	K07217	18099	NODE_1514_length_9962_cov_6_850409	None	Mn-containing catalase
537	Alistipes_sp009774895	Alistipes_sp009774895	K07001	18085	NODE_52_length_52524_cov_9_748633	None	NTE family protein
538	Alistipes_sp009774895	Alistipes_sp009774895	K14441	18074	NODE_52_length_52524_cov_9_748633	None	ribosomal protein S12 methylthiotransferase [EC:2.8.4.4]
539	Alistipes_sp009774895	Alistipes_sp009774895	K00554	18037	NODE_52_length_52524_cov_9_748633	None	tRNA (guanine37-N1)-methyltransferase [EC:2.1.1.228]
540	Alistipes_sp009774895	Alistipes_sp009774895	K06287	18041	NODE_52_length_52524_cov_9_748633	None	septum formation protein
541	Alistipes_sp009774895	Alistipes_sp009774895	K18682	18071	NODE_52_length_52524_cov_9_748633	None	ribonucrease Y [EC:3.1.-.-]
542	Alistipes_sp009774895	Alistipes_sp009774895	K03495	18090	NODE_52_length_52524_cov_9_748633	None	tRNA uridine 5-carboxymethylaminomethyl modification enzyme
543	Alistipes_sp009774895	Alistipes_sp009774895	K01889	18086	NODE_52_length_52524_cov_9_748633	None	phenylalanyl-tRNA synthetase alpha chain [EC:6.1.1.20]
544	Alistipes_sp009774895	Alistipes_sp009774895	K01297	18082	NODE_52_length_52524_cov_9_748633	None	muramoyltetrapeptide carboxypeptidase [EC:3.4.17.13]
545	Alistipes_sp009774895	Alistipes_sp009774895	K18672	18101	NODE_1514_length_9962_cov_6_850409	None	diadenylate cyclase [EC:2.7.7.85]
546	Alistipes_sp009774895	Alistipes_sp009774895	K01069	18034	NODE_52_length_52524_cov_9_748633	None	hydroxyacylglutathione hydrolase [EC:3.1.2.6]
547	Alistipes_sp009774895	Alistipes_sp009774895	K02217	18063	NODE_52_length_52524_cov_9_748633	None	ferritin [EC:1.16.3.2]
548	Alistipes_sp009774895	Alistipes_sp009774895	K07082	18096	NODE_1514_length_9962_cov_6_850409	None	UPF0755 protein
549	Alistipes_sp009774895	Alistipes_sp009774895	K07040	18069	NODE_52_length_52524_cov_9_748633	None	uncharacterized protein
550	Alistipes_sp009774895	Alistipes_sp009774895	K07042	18089	NODE_52_length_52524_cov_9_748633	None	probable rRNA maturation factor
551	Alistipes_sp009774895	Alistipes_sp009774895	K03621	18067	NODE_52_length_52524_cov_9_748633	None	phosphate acyltransferase [EC:2.3.1.274]
552	Alistipes_sp009774895	Alistipes_sp009774895	K07076	13704	NODE_910_length_13644_cov_7_938553	None	uncharacterized protein
553	Alistipes_sp009774895	Alistipes_sp009774895	K07076	9985	NODE_460_length_19508_cov_8_266283	None	uncharacterized protein
554	Alistipes_sp009774895	Alistipes_sp009774895	K07076	4082	NODE_255_length_26657_cov_7_867754	None	uncharacterized protein
555	Alistipes_sp009774895	Alistipes_sp009774895	K09704	10001	NODE_460_length_19508_cov_8_266283	None	uncharacterized protein
556	Alistipes_sp009774895	Alistipes_sp009774895	K07029	14489	NODE_1_length_146572_cov_8_806255	None	diacylglycerol kinase (ATP) [EC:2.7.1.107]
557	Alistipes_sp009774895	Alistipes_sp009774895	K07029	9990	NODE_460_length_19508_cov_8_266283	None	diacylglycerol kinase (ATP) [EC:2.7.1.107]
558	Alistipes_sp009774895	Alistipes_sp009774895	K09797	9998	NODE_460_length_19508_cov_8_266283	None	uncharacterized protein
559	Alistipes_sp009774895	Alistipes_sp009774895	K06217	9988	NODE_460_length_19508_cov_8_266283	None	phosphate starvation-inducible protein PhoH and related proteins
560	Alistipes_sp009774895	Alistipes_sp009774895	K03811	9994	NODE_460_length_19508_cov_8_266283	None	nicotinamide mononucleotide transporter
561	Alistipes_sp009774895	Alistipes_sp009774895	K06942	9999	NODE_460_length_19508_cov_8_266283	None	ribosome-binding ATPase
562	Alistipes_sp009774895	Alistipes_sp009774895	K03616	18544	NODE_54_length_52269_cov_8_164247	None	Na+-translocating ferredoxin:NAD+ oxidoreductase subunit B [EC:7.2.1.2]
563	Alistipes_sp009774895	Alistipes_sp009774895	K03617	18539	NODE_54_length_52269_cov_8_164247	None	Na+-translocating ferredoxin:NAD+ oxidoreductase subunit A
564	Alistipes_sp009774895	Alistipes_sp009774895	K03615	18543	NODE_54_length_52269_cov_8_164247	None	Na+-translocating ferredoxin:NAD+ oxidoreductase subunit C [EC:7.2.1.2]
565	Alistipes_sp009774895	Alistipes_sp009774895	K03614	18542	NODE_54_length_52269_cov_8_164247	None	Na+-translocating ferredoxin:NAD+ oxidoreductase subunit D [EC:7.2.1.2]
566	Alistipes_sp009774895	Alistipes_sp009774895	K01759	18532	NODE_54_length_52269_cov_8_164247	None	lactoylglutathione lyase [EC:4.4.1.5]
567	Alistipes_sp009774895	Alistipes_sp009774895	K00721	18538	NODE_54_length_52269_cov_8_164247	None	dolichol-phosphate mannosyltransferase [EC:2.4.1.83]
568	Alistipes_sp009774895	Alistipes_sp009774895	K00721	18093	NODE_1514_length_9962_cov_6_850409	None	dolichol-phosphate mannosyltransferase [EC:2.4.1.83]
569	Alistipes_sp009774895	Alistipes_sp009774895	K09710	18525	NODE_54_length_52269_cov_8_164247	None	ribosome-associated protein
570	Alistipes_sp009774895	Alistipes_sp009774895	K07107	18530	NODE_54_length_52269_cov_8_164247	None	acyl-CoA thioester hydrolase [EC:3.1.2.-]
571	Alistipes_sp009774895	Alistipes_sp009774895	K07107	15941	NODE_35_length_61761_cov_7_096004	None	acyl-CoA thioester hydrolase [EC:3.1.2.-]
572	Alistipes_sp009774895	Alistipes_sp009774895	K03613	18540	NODE_54_length_52269_cov_8_164247	None	Na+-translocating ferredoxin:NAD+ oxidoreductase subunit E
573	Alistipes_sp009774895	Alistipes_sp009774895	K02860	18563	NODE_54_length_52269_cov_8_164247	None	16S rRNA processing protein RimM
574	Alistipes_sp009774895	Alistipes_sp009774895	K03565	18552	NODE_54_length_52269_cov_8_164247	None	regulatory protein
575	Alistipes_sp009774895	Alistipes_sp009774895	K03798	18524	NODE_54_length_52269_cov_8_164247	None	cell division protease FtsH [EC:3.4.24.-]
576	Alistipes_sp009774895	Alistipes_sp009774895	K02493	18553	NODE_54_length_52269_cov_8_164247	None	release factor glutamine methyltransferase [EC:2.1.1.297]
577	Alistipes_sp009774895	Alistipes_sp009774895	K03612	18541	NODE_54_length_52269_cov_8_164247	None	Na+-translocating ferredoxin:NAD+ oxidoreductase subunit G
578	Alistipes_sp009774895	Alistipes_sp009774895	K02959	18564	NODE_54_length_52269_cov_8_164247	None	small subunit ribosomal protein S16
579	Alistipes_sp009774895	Alistipes_sp009774895	K06861	18556	NODE_54_length_52269_cov_8_164247	None	lipopolysaccharide export system ATP-binding protein [EC:3.6.3.-]
580	Alistipes_sp009774895	Alistipes_sp009774895	K03654	18557	NODE_54_length_52269_cov_8_164247	None	ATP-dependent DNA helicase RecQ [EC:3.6.4.12]
581	Alistipes_sp009774895	Alistipes_sp009774895	K03654	1319	NODE_2470_length_7252_cov_6_143115	None	ATP-dependent DNA helicase RecQ [EC:3.6.4.12]
582	Alistipes_sp009774895	Alistipes_sp009774895	K00566	18561	NODE_54_length_52269_cov_8_164247	None	tRNA-uridine 2-sulfurtransferase [EC:2.8.1.13]
583	Alistipes_sp009774895	Alistipes_sp009774895	K03281	18528	NODE_54_length_52269_cov_8_164247	None	chloride channel protein, CIC family
584	Alistipes_sp009774895	Alistipes_sp009774895	K01867	18527	NODE_54_length_52269_cov_8_164247	None	tryptophanyl-tRNA synthetase [EC:6.1.1.2]
585	Alistipes_sp009774895	Alistipes_sp009774895	K02348	18562	NODE_54_length_52269_cov_8_164247	None	ElaA protein
586	Alistipes_sp009774895	Alistipes_sp009774895	K13747	18572	NODE_1534_length_9885_cov_6_611801	None	carboxynorspermidine decarboxylase [EC:4.1.1.96]
587	Alistipes_sp009774895	Alistipes_sp009774895	K02528	18560	NODE_54_length_52269_cov_8_164247	None	16S rRNA (adenine1518-N6/adenine1519-N6)-dimethyltransferase [EC:2.1.1.182]
588	Alistipes_sp009774895	Alistipes_sp009774895	K18189	18536	NODE_54_length_52269_cov_8_164247	None	translational activator of cytochrome c oxidase 1
589	Alistipes_sp009774895	Alistipes_sp009774895	K04761	18526	NODE_54_length_52269_cov_8_164247	None	LysR family transcriptional regulator, hydrogen peroxide-inducible genes activator
590	Alistipes_sp009774895	Alistipes_sp009774895	K15527	18571	NODE_1534_length_9885_cov_6_611801	None	cysteate synthase [EC:2.5.1.76]
591	Alistipes_sp009774895	Alistipes_sp009774895	K08956	18524	NODE_54_length_52269_cov_8_164247	None	AFG3 family protein [EC:3.4.24.-]
592	Alistipes_sp009774895	Alistipes_sp009774895	K03803	18545	NODE_54_length_52269_cov_8_164247	None	sigma-E factor negative regulatory protein RseC
593	Alistipes_sp009774895	Alistipes_sp009774895	K03771	8913	NODE_406_length_20809_cov_7_889612	None	peptidyl-prolyl cis-trans isomerase SurA [EC:5.2.1.8]
594	Alistipes_sp009774895	Alistipes_sp009774895	K16053	8915	NODE_406_length_20809_cov_7_889612	None	miniconductance mechanosensitive channel
595	Alistipes_sp009774895	Alistipes_sp009774895	K03496	8910	NODE_406_length_20809_cov_7_889612	None	chromosome partitioning protein
596	Alistipes_sp009774895	Alistipes_sp009774895	K08307	8907	NODE_406_length_20809_cov_7_889612	None	membrane-bound lytic murein transglycosylase D [EC:4.2.2.-]
597	Alistipes_sp009774895	Alistipes_sp009774895	K03497	8909	NODE_406_length_20809_cov_7_889612	None	ParB family transcriptional regulator, chromosome partitioning protein
598	Alistipes_sp009774895	Alistipes_sp009774895	K03650	8906	NODE_406_length_20809_cov_7_889612	None	tRNA modification GTPase [EC:3.6.-.-]
599	Alistipes_sp009774895	Alistipes_sp009774895	K07733	8902	NODE_406_length_20809_cov_7_889612	None	prophage regulatory protein
600	Alistipes_sp009774895	Alistipes_sp009774895	K07052	8911	NODE_406_length_20809_cov_7_889612	None	uncharacterized protein
601	Alistipes_sp009774895	Alistipes_sp009774895	K07317	15626	NODE_32_length_63147_cov_7_072973	None	adenine-specific DNA-methyltransferase [EC:2.1.1.72]
602	Alistipes_sp009774895	Alistipes_sp009774895	K07089	15624	NODE_32_length_63147_cov_7_072973	None	uncharacterized protein
603	Alistipes_sp009774895	Alistipes_sp009774895	K07089	2785	NODE_207_length_30329_cov_8_180881	None	uncharacterized protein
604	Alistipes_sp009774895	Alistipes_sp009774895	K01159	15611	NODE_32_length_63147_cov_7_072973	None	crossover junction endodeoxyribonuclease RuvC [EC:3.1.22.4]
605	Alistipes_sp009774895	Alistipes_sp009774895	K22757	15589	NODE_32_length_63147_cov_7_072973	None	glutaminyl-peptide cyclotransferase [EC:2.3.2.5]
606	Alistipes_sp009774895	Alistipes_sp009774895	K03648	15579	NODE_32_length_63147_cov_7_072973	None	uracil-DNA glycosylase [EC:3.2.2.27]
607	Alistipes_sp009774895	Alistipes_sp009774895	K03892	15620	NODE_32_length_63147_cov_7_072973	None	ArsR family transcriptional regulator, arsenate/arsenite/antimonite-responsive transcriptional repressor
608	Alistipes_sp009774895	Alistipes_sp009774895	K01104	15638	NODE_1127_length_11909_cov_6_790535	None	protein-tyrosine phosphatase [EC:3.1.3.48]
609	Alistipes_sp009774895	Alistipes_sp009774895	K02340	15605	NODE_32_length_63147_cov_7_072973	None	DNA polymerase III subunit delta [EC:2.7.7.7]
610	Alistipes_sp009774895	Alistipes_sp009774895	K12573	15593	NODE_32_length_63147_cov_7_072973	None	ribonuclease R [EC:3.1.13.1]
611	Alistipes_sp009774895	Alistipes_sp009774895	K01876	15578	NODE_32_length_63147_cov_7_072973	None	aspartyl-tRNA synthetase [EC:6.1.1.12]
612	Alistipes_sp009774895	Alistipes_sp009774895	K02013	15618	NODE_32_length_63147_cov_7_072973	None	iron complex transport system ATP-binding protein [EC:7.2.2.-]
613	Alistipes_sp009774895	Alistipes_sp009774895	K02564	15629	NODE_32_length_63147_cov_7_072973	None	glucosamine-6-phosphate deaminase [EC:3.5.99.6]
614	Alistipes_sp009774895	Alistipes_sp009774895	K02564	15630	NODE_32_length_63147_cov_7_072973	None	glucosamine-6-phosphate deaminase [EC:3.5.99.6]
615	Alistipes_sp009774895	Alistipes_sp009774895	K04075	15604	NODE_32_length_63147_cov_7_072973	None	tRNA(Ile)-lysidine synthase [EC:6.3.4.19]
616	Alistipes_sp009774895	Alistipes_sp009774895	K02015	15619	NODE_32_length_63147_cov_7_072973	None	iron complex transport system permease protein
617	Alistipes_sp009774895	Alistipes_sp009774895	K00075	15603	NODE_32_length_63147_cov_7_072973	None	UDP-N-acetylmuramate dehydrogenase [EC:1.3.1.98]
618	Alistipes_sp009774895	Alistipes_sp009774895	K04771	15582	NODE_32_length_63147_cov_7_072973	None	serine protease Do [EC:3.4.21.107]
619	Alistipes_sp009774895	Alistipes_sp009774895	K03544	15585	NODE_32_length_63147_cov_7_072973	None	ATP-dependent Clp protease ATP-binding subunit ClpX
620	Alistipes_sp009774895	Alistipes_sp009774895	K03545	15587	NODE_32_length_63147_cov_7_072973	None	trigger factor
621	Alistipes_sp009774895	Alistipes_sp009774895	K00691	14961	NODE_930_length_13361_cov_7_226289	None	maltose phosphorylase [EC:2.4.1.8]
622	Alistipes_sp009774895	Alistipes_sp009774895	K03217	15301	NODE_1110_length_12048_cov_7_588510	None	YidC/Oxa1 family membrane protein insertase
623	Alistipes_sp009774895	Alistipes_sp009774895	K03113	15289	NODE_31_length_65208_cov_9_345019	None	translation initiation factor 1
624	Alistipes_sp009774895	Alistipes_sp009774895	K16899	15280	NODE_31_length_65208_cov_9_345019	None	ATP-dependent helicase/nuclease subunit B [EC:3.1.-.- 3.6.4.12]
625	Alistipes_sp009774895	Alistipes_sp009774895	K04078	15261	NODE_31_length_65208_cov_9_345019	None	chaperonin GroES
626	Alistipes_sp009774895	Alistipes_sp009774895	K03501	14953	NODE_5_length_114957_cov_9_480653	None	16S rRNA (guanine527-N7)-methyltransferase [EC:2.1.1.170]
627	Alistipes_sp009774895	Alistipes_sp009774895	K01887	14963	NODE_930_length_13361_cov_7_226289	None	arginyl-tRNA synthetase [EC:6.1.1.19]
628	Alistipes_sp009774895	Alistipes_sp009774895	K11720	14950	NODE_5_length_114957_cov_9_480653	None	lipopolysaccharide export system permease protein
629	Alistipes_sp009774895	Alistipes_sp009774895	K05807	15269	NODE_31_length_65208_cov_9_345019	None	outer membrane protein assembly factor BamD
630	Alistipes_sp009774895	Alistipes_sp009774895	K00773	14951	NODE_5_length_114957_cov_9_480653	None	queuine tRNA-ribosyltransferase [EC:2.4.2.29]
631	Alistipes_sp009774895	Alistipes_sp009774895	K03524	15277	NODE_31_length_65208_cov_9_345019	None	BirA family transcriptional regulator, biotin operon repressor / biotin---[acetyl-CoA-carboxylase] ligase [EC:6.3.4.15]
632	Alistipes_sp009774895	Alistipes_sp009774895	K04077	15262	NODE_31_length_65208_cov_9_345019	None	chaperonin GroEL
633	Alistipes_sp009774895	Alistipes_sp009774895	K02065	15247	NODE_31_length_65208_cov_9_345019	None	phospholipid/cholesterol/gamma-HCH transport system ATP-binding protein
634	Alistipes_sp009774895	Alistipes_sp009774895	K06969	15299	NODE_1110_length_12048_cov_7_588510	None	23S rRNA (cytosine1962-C5)-methyltransferase [EC:2.1.1.191]
635	Alistipes_sp009774895	Alistipes_sp009774895	K06969	4093	NODE_255_length_26657_cov_7_867754	None	23S rRNA (cytosine1962-C5)-methyltransferase [EC:2.1.1.191]
636	Alistipes_sp009774895	Alistipes_sp009774895	K02066	15248	NODE_31_length_65208_cov_9_345019	None	phospholipid/cholesterol/gamma-HCH transport system permease protein
637	Alistipes_sp009774895	Alistipes_sp009774895	K07095	15295	NODE_31_length_65208_cov_9_345019	None	uncharacterized protein
638	Alistipes_sp009774895	Alistipes_sp009774895	K03631	15266	NODE_31_length_65208_cov_9_345019	None	DNA repair protein RecN (Recombination protein N)
639	Alistipes_sp009774895	Alistipes_sp009774895	K06199	15306	NODE_1110_length_12048_cov_7_588510	None	fluoride exporter
640	Alistipes_sp009774895	Alistipes_sp009774895	K06199	5508	NODE_298_length_24846_cov_9_229841	None	fluoride exporter
641	Alistipes_sp009774895	Alistipes_sp009774895	K03624	15272	NODE_31_length_65208_cov_9_345019	None	transcription elongation factor GreA
642	Alistipes_sp009774895	Alistipes_sp009774895	K11717	12068	NODE_624_length_16710_cov_7_657760	None	cysteine desulfurase / selenocysteine lyase [EC:2.8.1.7 4.4.1.16]
643	Alistipes_sp009774895	Alistipes_sp009774895	K22405	12077	NODE_624_length_16710_cov_7_657760	None	NADH oxidase (H2O-forming) [EC:1.6.3.4]
644	Alistipes_sp009774895	Alistipes_sp009774895	K03602	5500	NODE_298_length_24846_cov_9_229841	None	exodeoxyribonuclease VII small subunit [EC:3.1.11.6]
645	Alistipes_sp009774895	Alistipes_sp009774895	K03561	5528	NODE_5932_length_4001_cov_9_068931	None	biopolymer transport protein ExbB
646	Alistipes_sp009774895	Alistipes_sp009774895	K03561	1786	NODE_183_length_31787_cov_9_376749	None	biopolymer transport protein ExbB
647	Alistipes_sp009774895	Alistipes_sp009774895	K03601	5501	NODE_298_length_24846_cov_9_229841	None	exodeoxyribonuclease VII large subunit [EC:3.1.11.6]
648	Alistipes_sp009774895	Alistipes_sp009774895	K03189	5514	NODE_298_length_24846_cov_9_229841	None	urease accessory protein
649	Alistipes_sp009774895	Alistipes_sp009774895	K08368	5517	NODE_298_length_24846_cov_9_229841	None	MFS transporter, putative metabolite transport protein
650	Alistipes_sp009774895	Alistipes_sp009774895	K03188	5513	NODE_298_length_24846_cov_9_229841	None	urease accessory protein
651	Alistipes_sp009774895	Alistipes_sp009774895	K03559	1788	NODE_183_length_31787_cov_9_376749	None	biopolymer transport protein ExbD
652	Alistipes_sp009774895	Alistipes_sp009774895	K03559	1789	NODE_183_length_31787_cov_9_376749	None	biopolymer transport protein ExbD
653	Alistipes_sp009774895	Alistipes_sp009774895	K03559	5527	NODE_5932_length_4001_cov_9_068931	None	biopolymer transport protein ExbD
654	Alistipes_sp009774895	Alistipes_sp009774895	K01428	5511	NODE_298_length_24846_cov_9_229841	None	urease subunit alpha [EC:3.5.1.5]
655	Alistipes_sp009774895	Alistipes_sp009774895	K01429	5510	NODE_298_length_24846_cov_9_229841	None	urease subunit beta [EC:3.5.1.5]
656	Alistipes_sp009774895	Alistipes_sp009774895	K12960	5524	NODE_5932_length_4001_cov_9_068931	None	5-methylthioadenosine/S-adenosylhomocysteine deaminase [EC:3.5.4.31 3.5.4.28]
657	Alistipes_sp009774895	Alistipes_sp009774895	K03101	5522	NODE_298_length_24846_cov_9_229841	None	signal peptidase II [EC:3.4.23.36]
658	Alistipes_sp009774895	Alistipes_sp009774895	K08717	5516	NODE_298_length_24846_cov_9_229841	None	urea transporter
659	Alistipes_sp009774895	Alistipes_sp009774895	K11068	5498	NODE_298_length_24846_cov_9_229841	None	hemolysin III
660	Alistipes_sp009774895	Alistipes_sp009774895	K02835	5504	NODE_298_length_24846_cov_9_229841	None	peptide chain release factor 1
661	Alistipes_sp009774895	Alistipes_sp009774895	K03187	5512	NODE_298_length_24846_cov_9_229841	None	urease accessory protein
662	Alistipes_sp009774895	Alistipes_sp009774895	K03190	5515	NODE_298_length_24846_cov_9_229841	None	urease accessory protein
663	Alistipes_sp009774895	Alistipes_sp009774895	K07443	5503	NODE_298_length_24846_cov_9_229841	None	methylated-DNA-protein-cysteine methyltransferase related protein
664	Alistipes_sp009774895	Alistipes_sp009774895	K07079	11123	NODE_521_length_18208_cov_7_240236	None	uncharacterized protein
665	Alistipes_sp009774895	Alistipes_sp009774895	K07079	5507	NODE_298_length_24846_cov_9_229841	None	uncharacterized protein
666	Alistipes_sp009774895	Alistipes_sp009774895	K06949	14477	NODE_1_length_146572_cov_8_806255	None	ribosome biogenesis GTPase / thiamine phosphate phosphatase [EC:3.6.1.- 3.1.3.100]
667	Alistipes_sp009774895	Alistipes_sp009774895	K02939	14427	NODE_1_length_146572_cov_8_806255	None	large subunit ribosomal protein L9
668	Alistipes_sp009774895	Alistipes_sp009774895	K02469	14531	NODE_920_length_13490_cov_7_382508	None	DNA gyrase subunit A [EC:5.6.2.2]
669	Alistipes_sp009774895	Alistipes_sp009774895	K01000	14438	NODE_1_length_146572_cov_8_806255	None	phospho-N-acetylmuramoyl-pentapeptide-transferase [EC:2.7.8.13]
670	Alistipes_sp009774895	Alistipes_sp009774895	K03775	14419	NODE_1_length_146572_cov_8_806255	None	FKBP-type peptidyl-prolyl cis-trans isomerase SlyD [EC:5.2.1.8]
671	Alistipes_sp009774895	Alistipes_sp009774895	K00876	14421	NODE_1_length_146572_cov_8_806255	None	uridine kinase [EC:2.7.1.48]
672	Alistipes_sp009774895	Alistipes_sp009774895	K00876	17077	NODE_41_length_58418_cov_7_187345	None	uridine kinase [EC:2.7.1.48]
673	Alistipes_sp009774895	Alistipes_sp009774895	K06973	14455	NODE_1_length_146572_cov_8_806255	None	uncharacterized protein
674	Alistipes_sp009774895	Alistipes_sp009774895	K19271	14408	NODE_1_length_146572_cov_8_806255	None	chloramphenicol O-acetyltransferase type A [EC:2.3.1.28]
675	Alistipes_sp009774895	Alistipes_sp009774895	K19271	3250	NODE_3067_length_6243_cov_6_850679	None	chloramphenicol O-acetyltransferase type A [EC:2.3.1.28]
676	Alistipes_sp009774895	Alistipes_sp009774895	K08169	14464	NODE_1_length_146572_cov_8_806255	None	MFS transporter, DHA2 family, multidrug resistance protein
677	Alistipes_sp009774895	Alistipes_sp009774895	K06178	14528	NODE_920_length_13490_cov_7_382508	None	23S rRNA pseudouridine2605 synthase [EC:5.4.99.22]
678	Alistipes_sp009774895	Alistipes_sp009774895	K03558	14476	NODE_1_length_146572_cov_8_806255	None	membrane protein required for colicin V production
679	Alistipes_sp009774895	Alistipes_sp009774895	K03438	14434	NODE_1_length_146572_cov_8_806255	None	16S rRNA (cytosine1402-N4)-methyltransferase [EC:2.1.1.199]
680	Alistipes_sp009774895	Alistipes_sp009774895	K07460	14512	NODE_1_length_146572_cov_8_806255	None	putative endonuclease
681	Alistipes_sp009774895	Alistipes_sp009774895	K01880	14516	NODE_1_length_146572_cov_8_806255	None	glycyl-tRNA synthetase [EC:6.1.1.14]
682	Alistipes_sp009774895	Alistipes_sp009774895	K00962	14486	NODE_1_length_146572_cov_8_806255	None	polyribonucleotide nucleotidyltransferase [EC:2.7.7.8]
683	Alistipes_sp009774895	Alistipes_sp009774895	K00784	14412	NODE_1_length_146572_cov_8_806255	None	ribonuclease Z [EC:3.1.26.11]
684	Alistipes_sp009774895	Alistipes_sp009774895	K07405	14497	NODE_1_length_146572_cov_8_806255	None	alpha-amylase [EC:3.2.1.1]
685	Alistipes_sp009774895	Alistipes_sp009774895	K01925	14439	NODE_1_length_146572_cov_8_806255	None	UDP-N-acetylmuramoylalanine--D-glutamate ligase [EC:6.3.2.9]
686	Alistipes_sp009774895	Alistipes_sp009774895	K02342	15945	NODE_35_length_61761_cov_7_096004	None	DNA polymerase III subunit epsilon [EC:2.7.7.7]
687	Alistipes_sp009774895	Alistipes_sp009774895	K02342	14462	NODE_1_length_146572_cov_8_806255	None	DNA polymerase III subunit epsilon [EC:2.7.7.7]
688	Alistipes_sp009774895	Alistipes_sp009774895	K09808	14457	NODE_1_length_146572_cov_8_806255	None	lipoprotein-releasing system permease protein
689	Alistipes_sp009774895	Alistipes_sp009774895	K09808	1798	NODE_183_length_31787_cov_9_376749	None	lipoprotein-releasing system permease protein
690	Alistipes_sp009774895	Alistipes_sp009774895	K00384	14414	NODE_1_length_146572_cov_8_806255	None	thioredoxin reductase (NADPH) [EC:1.8.1.9]
691	Alistipes_sp009774895	Alistipes_sp009774895	K02963	14426	NODE_1_length_146572_cov_8_806255	None	small subunit ribosomal protein S18
692	Alistipes_sp009774895	Alistipes_sp009774895	K05995	14511	NODE_1_length_146572_cov_8_806255	None	dipeptidase E [EC:3.4.13.21]
693	Alistipes_sp009774895	Alistipes_sp009774895	K00556	3716	NODE_224_length_28757_cov_7_778064	None	tRNA (guanosine-2'-O-)-methyltransferase [EC:2.1.1.34]
694	Alistipes_sp009774895	Alistipes_sp009774895	K00556	14478	NODE_1_length_146572_cov_8_806255	None	tRNA (guanosine-2'-O-)-methyltransferase [EC:2.1.1.34]
695	Alistipes_sp009774895	Alistipes_sp009774895	K01462	14518	NODE_1_length_146572_cov_8_806255	None	peptide deformylase [EC:3.5.1.88]
696	Alistipes_sp009774895	Alistipes_sp009774895	K02990	14425	NODE_1_length_146572_cov_8_806255	None	small subunit ribosomal protein S6
697	Alistipes_sp009774895	Alistipes_sp009774895	K03734	14488	NODE_1_length_146572_cov_8_806255	None	FAD:protein FMN transferase [EC:2.7.1.180]
698	Alistipes_sp009774895	Alistipes_sp009774895	K16066	14456	NODE_1_length_146572_cov_8_806255	None	3-hydroxy acid dehydrogenase / malonic semialdehyde reductase [EC:1.1.1.381 1.1.1.-]
699	Alistipes_sp009774895	Alistipes_sp009774895	K03655	14470	NODE_1_length_146572_cov_8_806255	None	ATP-dependent DNA helicase RecG [EC:3.6.4.12]
700	Alistipes_sp009774895	Alistipes_sp009774895	K13652	14407	NODE_1_length_146572_cov_8_806255	None	AraC family transcriptional regulator
701	Alistipes_sp009774895	Alistipes_sp009774895	K02004	13696	NODE_910_length_13644_cov_7_938553	None	putative ABC transport system permease protein
702	Alistipes_sp009774895	Alistipes_sp009774895	K02004	14457	NODE_1_length_146572_cov_8_806255	None	putative ABC transport system permease protein
703	Alistipes_sp009774895	Alistipes_sp009774895	K02004	1798	NODE_183_length_31787_cov_9_376749	None	putative ABC transport system permease protein
704	Alistipes_sp009774895	Alistipes_sp009774895	K02004	13695	NODE_910_length_13644_cov_7_938553	None	putative ABC transport system permease protein
705	Alistipes_sp009774895	Alistipes_sp009774895	K02945	14505	NODE_1_length_146572_cov_8_806255	None	small subunit ribosomal protein S1
706	Alistipes_sp009774895	Alistipes_sp009774895	K01928	14437	NODE_1_length_146572_cov_8_806255	None	UDP-N-acetylmuramoyl-L-alanyl-D-glutamate--2,6-diaminopimelate ligase [EC:6.3.2.13]
707	Alistipes_sp009774895	Alistipes_sp009774895	K03685	14508	NODE_1_length_146572_cov_8_806255	None	ribonuclease III [EC:3.1.26.3]
708	Alistipes_sp009774895	Alistipes_sp009774895	K02968	14506	NODE_1_length_146572_cov_8_806255	None	small subunit ribosomal protein S20
709	Alistipes_sp009774895	Alistipes_sp009774895	K01091	14442	NODE_1_length_146572_cov_8_806255	None	phosphoglycolate phosphatase [EC:3.1.3.18]
710	Alistipes_sp009774895	Alistipes_sp009774895	K02956	14487	NODE_1_length_146572_cov_8_806255	None	small subunit ribosomal protein S15
711	Alistipes_sp009774895	Alistipes_sp009774895	K02837	14502	NODE_1_length_146572_cov_8_806255	None	peptide chain release factor 3
712	Alistipes_sp009774895	Alistipes_sp009774895	K19294	14453	NODE_1_length_146572_cov_8_806255	None	alginate O-acetyltransferase complex protein AlgI
713	Alistipes_sp009774895	Alistipes_sp009774895	K04762	14441	NODE_1_length_146572_cov_8_806255	None	ribosome-associated heat shock protein Hsp15
714	Alistipes_sp009774895	Alistipes_sp009774895	K01619	14484	NODE_1_length_146572_cov_8_806255	None	deoxyribose-phosphate aldolase [EC:4.1.2.4]
715	Alistipes_sp009774895	Alistipes_sp009774895	K03437	14411	NODE_1_length_146572_cov_8_806255	None	RNA methyltransferase, TrmH family
716	Alistipes_sp009774895	Alistipes_sp009774895	K07447	14517	NODE_1_length_146572_cov_8_806255	None	putative holliday junction resolvase [EC:3.1.-.-]
717	Alistipes_sp009774895	Alistipes_sp009774895	K04567	14451	NODE_1_length_146572_cov_8_806255	None	lysyl-tRNA synthetase, class II [EC:6.1.1.6]
718	Alistipes_sp009774895	Alistipes_sp009774895	K03630	14515	NODE_1_length_146572_cov_8_806255	None	DNA repair protein RadC
719	Alistipes_sp009774895	Alistipes_sp009774895	K01972	14524	NODE_920_length_13490_cov_7_382508	None	DNA ligase (NAD+) [EC:6.5.1.2]
720	Alistipes_sp009774895	Alistipes_sp009774895	K18979	14429	NODE_1_length_146572_cov_8_806255	None	epoxyqueuosine reductase [EC:1.17.99.6]
721	Alistipes_sp009774895	Alistipes_sp009774895	K18979	14406	NODE_1_length_146572_cov_8_806255	None	epoxyqueuosine reductase [EC:1.17.99.6]
722	Alistipes_sp009774895	Alistipes_sp009774895	K01151	14480	NODE_1_length_146572_cov_8_806255	None	deoxyribonuclease IV [EC:3.1.21.2]
723	Alistipes_sp009774895	Alistipes_sp009774895	K03169	14399	NODE_1_length_146572_cov_8_806255	None	DNA topoisomerase III [EC:5.6.2.1]
724	Alistipes_sp009774895	Alistipes_sp009774895	K06020	15931	NODE_35_length_61761_cov_7_096004	None	energy-dependent translational throttle protein EttA
725	Alistipes_sp009774895	Alistipes_sp009774895	K06168	15914	NODE_35_length_61761_cov_7_096004	None	tRNA-2-methylthio-N6-dimethylallyladenosine synthase [EC:2.8.4.3]
726	Alistipes_sp009774895	Alistipes_sp009774895	K02899	15961	NODE_1266_length_11105_cov_8_618190	None	large subunit ribosomal protein L27
727	Alistipes_sp009774895	Alistipes_sp009774895	K07705	15919	NODE_35_length_61761_cov_7_096004	None	two-component system, LytTR family, response regulator LytT
728	Alistipes_sp009774895	Alistipes_sp009774895	K02888	15960	NODE_1266_length_11105_cov_8_618190	None	large subunit ribosomal protein L21
729	Alistipes_sp009774895	Alistipes_sp009774895	K07098	15901	NODE_35_length_61761_cov_7_096004	None	uncharacterized protein
730	Alistipes_sp009774895	Alistipes_sp009774895	K08591	15916	NODE_35_length_61761_cov_7_096004	None	acyl phosphate:glycerol-3-phosphate acyltransferase [EC:2.3.1.275]
731	Alistipes_sp009774895	Alistipes_sp009774895	K21908	15898	NODE_35_length_61761_cov_7_096004	None	membrane protein HdeD
732	Alistipes_sp009774895	Alistipes_sp009774895	K02337	15937	NODE_35_length_61761_cov_7_096004	None	DNA polymerase III subunit alpha [EC:2.7.7.7]
733	Alistipes_sp009774895	Alistipes_sp009774895	K02478	15918	NODE_35_length_61761_cov_7_096004	None	two-component system, LytTR family, sensor kinase [EC:2.7.13.3]
734	Alistipes_sp009774895	Alistipes_sp009774895	K01993	15904	NODE_35_length_61761_cov_7_096004	None	HlyD family secretion protein
735	Alistipes_sp009774895	Alistipes_sp009774895	K08974	15934	NODE_35_length_61761_cov_7_096004	None	putative membrane protein
736	Alistipes_sp009774895	Alistipes_sp009774895	K20483	15923	NODE_35_length_61761_cov_7_096004	None	lantibiotic biosynthesis protein
737	Alistipes_sp009774895	Alistipes_sp009774895	K20483	15924	NODE_35_length_61761_cov_7_096004	None	lantibiotic biosynthesis protein
738	Alistipes_sp009774895	Alistipes_sp009774895	K04079	15940	NODE_35_length_61761_cov_7_096004	None	molecular chaperone HtpG
739	Alistipes_sp009774895	Alistipes_sp009774895	K09951	15945	NODE_35_length_61761_cov_7_096004	None	CRISPR-associated protein Cas2
740	Alistipes_sp009774895	Alistipes_sp009774895	K09951	19143	NODE_1594_length_9673_cov_7_883344	None	CRISPR-associated protein Cas2
741	Alistipes_sp009774895	Alistipes_sp009774895	K01892	15932	NODE_35_length_61761_cov_7_096004	None	histidyl-tRNA synthetase [EC:6.1.1.21]
742	Alistipes_sp009774895	Alistipes_sp009774895	K00757	15947	NODE_35_length_61761_cov_7_096004	None	uridine phosphorylase [EC:2.4.2.3]
743	Alistipes_sp009774895	Alistipes_sp009774895	K01926	15943	NODE_35_length_61761_cov_7_096004	None	redox-sensing transcriptional repressor
744	Alistipes_sp009774895	Alistipes_sp009774895	K03499	15954	NODE_1266_length_11105_cov_8_618190	None	trk system potassium uptake protein
745	Alistipes_sp009774895	Alistipes_sp009774895	K20484	15925	NODE_35_length_61761_cov_7_096004	None	lantibiotic biosynthesis protein
746	Alistipes_sp009774895	Alistipes_sp009774895	K03671	15938	NODE_35_length_61761_cov_7_096004	None	thioredoxin 1
747	Alistipes_sp009774895	Alistipes_sp009774895	K03671	4101	NODE_255_length_26657_cov_7_867754	None	thioredoxin 1
748	Alistipes_sp009774895	Alistipes_sp009774895	K01082	15956	NODE_1266_length_11105_cov_8_618190	None	3'(2'), 5'-bisphosphate nucleotidase [EC:3.1.3.7]
749	Alistipes_sp009774895	Alistipes_sp009774895	K15519	15952	NODE_1266_length_11105_cov_8_618190	None	deoxyadenosine/deoxycytidine kinase [EC:2.7.1.76 2.7.1.74]
750	Alistipes_sp009774895	Alistipes_sp009774895	K02338	15946	NODE_35_length_61761_cov_7_096004	None	DNA polymerase III subunit beta [EC:2.7.7.7]
751	Alistipes_sp009774895	Alistipes_sp009774895	K02477	15919	NODE_35_length_61761_cov_7_096004	None	two-component system, LytTR family, response regulator
752	Alistipes_sp009774895	Alistipes_sp009774895	K07126	15907	NODE_35_length_61761_cov_7_096004	None	uncharacterized protein
753	Alistipes_sp009774895	Alistipes_sp009774895	K12137	19124	NODE_60_length_49498_cov_7_333252	None	hydrogenase-4 component B [EC:1.-.-.-]
754	Alistipes_sp009774895	Alistipes_sp009774895	K01173	19129	NODE_60_length_49498_cov_7_333252	None	endonuclease G, mitochondrial
755	Alistipes_sp009774895	Alistipes_sp009774895	K01173	17044	NODE_41_length_58418_cov_7_187345	None	endonuclease G, mitochondrial
756	Alistipes_sp009774895	Alistipes_sp009774895	K07270	19116	NODE_60_length_49498_cov_7_333252	None	glycosyl transferase, family 25
757	Alistipes_sp009774895	Alistipes_sp009774895	K09761	19125	NODE_60_length_49498_cov_7_333252	None	16S rRNA (uracil1498-N3)-methyltransferase [EC:2.1.1.193]
758	Alistipes_sp009774895	Alistipes_sp009774895	K09952	19141	NODE_1594_length_9673_cov_7_883344	None	CRISPR-associated endonuclease Csn1 [EC:3.1.-.-]
759	Alistipes_sp009774895	Alistipes_sp009774895	K12141	19121	NODE_60_length_49498_cov_7_333252	None	hydrogenase-4 component F [EC:1.-.-.-]
760	Alistipes_sp009774895	Alistipes_sp009774895	K12140	19122	NODE_60_length_49498_cov_7_333252	None	hydrogenase-4 component E [EC:1.-.-.-]
761	Alistipes_sp009774895	Alistipes_sp009774895	K15342	19142	NODE_1594_length_9673_cov_7_883344	None	CRISP-associated protein Cas1
762	Alistipes_sp009774895	Alistipes_sp009774895	K01284	19126	NODE_60_length_49498_cov_7_333252	None	peptidyl-dipeptidase Dcp [EC:3.4.15.5]
763	Alistipes_sp009774895	Alistipes_sp009774895	K01284	19127	NODE_60_length_49498_cov_7_333252	None	peptidyl-dipeptidase Dcp [EC:3.4.15.5]
764	Alistipes_sp009774895	Alistipes_sp009774895	K07727	19139	NODE_1594_length_9673_cov_7_883344	None	putative transcriptional regulator
765	Alistipes_sp009774895	Alistipes_sp009774895	K07727	18052	NODE_52_length_52524_cov_9_748633	None	putative transcriptional regulator
766	Alistipes_sp009774895	Alistipes_sp009774895	K00459	19135	NODE_60_length_49498_cov_7_333252	None	nitronate monooxygenase [EC:1.13.12.16]
767	Alistipes_sp009774895	Alistipes_sp009774895	K07240	19117	NODE_60_length_49498_cov_7_333252	None	chromate transporter
768	Alistipes_sp009774895	Alistipes_sp009774895	K07240	19118	NODE_60_length_49498_cov_7_333252	None	chromate transporter
769	Alistipes_sp009774895	Alistipes_sp009774895	K01409	19136	NODE_60_length_49498_cov_7_333252	None	N6-L-threonylcarbamoyladenine synthase [EC:2.3.1.234]
770	Alistipes_sp009774895	Alistipes_sp009774895	K07507	8337	NODE_18575_length_1774_cov_6_393252	None	putative Mg2+ transporter-C (MgtC) family protein
771	Alistipes_sp009774895	Alistipes_sp009774895	K03070	8327	NODE_385_length_21468_cov_6_851072	None	preprotein translocase subunit SecA [EC:7.4.2.8]
772	Alistipes_sp009774895	Alistipes_sp009774895	K01893	8332	NODE_385_length_21468_cov_6_851072	None	asparaginyl-tRNA synthetase [EC:6.1.1.22]
773	Alistipes_sp009774895	Alistipes_sp009774895	K02426	8324	NODE_385_length_21468_cov_6_851072	None	cysteine desulfuration protein SufE
774	Alistipes_sp009774895	Alistipes_sp009774895	K00783	8334	NODE_385_length_21468_cov_6_851072	None	23S rRNA (pseudouridine1915-N3)-methyltransferase [EC:2.1.1.177]
775	Alistipes_sp009774895	Alistipes_sp009774895	K01493	8328	NODE_385_length_21468_cov_6_851072	None	dCMP deaminase [EC:3.5.4.12]
776	Alistipes_sp009774895	Alistipes_sp009774895	K03092	8331	NODE_385_length_21468_cov_6_851072	None	RNA polymerase sigma-54 factor
777	Alistipes_sp009774895	Alistipes_sp009774895	K09790	8318	NODE_385_length_21468_cov_6_851072	None	uncharacterized protein
778	Alistipes_sp009774895	Alistipes_sp009774895	K06207	8316	NODE_385_length_21468_cov_6_851072	None	GTP-binding protein
779	Alistipes_sp009774895	Alistipes_sp009774895	K03770	3241	NODE_218_length_29263_cov_8_224219	None	peptidyl-prolyl cis-trans isomerase D [EC:5.2.1.8]
780	Alistipes_sp009774895	Alistipes_sp009774895	K07149	3251	NODE_3067_length_6243_cov_6_850679	None	uncharacterized protein
781	Alistipes_sp009774895	Alistipes_sp009774895	K02395	3245	NODE_218_length_29263_cov_8_224219	None	peptidoglycan hydrolase FlgJ
782	Alistipes_sp009774895	Alistipes_sp009774895	K03668	3248	NODE_218_length_29263_cov_8_224219	None	heat shock protein HslJ
783	Alistipes_sp009774895	Alistipes_sp009774895	K00567	3242	NODE_218_length_29263_cov_8_224219	None	methylated-DNA-[protein]-cysteine S-methyltransferase [EC:2.1.1.63]
784	Alistipes_sp009774895	Alistipes_sp009774895	K03723	3235	NODE_218_length_29263_cov_8_224219	None	transcription-repair coupling factor (superfamily II helicase) [EC:3.6.4.-]
785	Alistipes_sp009774895	Alistipes_sp009774895	K01278	3243	NODE_218_length_29263_cov_8_224219	None	dipeptidyl-peptidase 4 [EC:3.4.14.5]
786	Alistipes_sp009774895	Alistipes_sp009774895	K03596	3253	NODE_3067_length_6243_cov_6_850679	None	GTP-binding protein LepA
787	Alistipes_sp009774895	Alistipes_sp009774895	K02967	9426	NODE_457_length_19557_cov_8_118347	None	small subunit ribosomal protein S2
788	Alistipes_sp009774895	Alistipes_sp009774895	K02357	9425	NODE_457_length_19557_cov_8_118347	None	elongation factor Ts
789	Alistipes_sp009774895	Alistipes_sp009774895	K01890	9417	NODE_457_length_19557_cov_8_118347	None	phenylalanyl-tRNA synthetase beta chain [EC:6.1.1.20]
790	Alistipes_sp009774895	Alistipes_sp009774895	K01726	9420	NODE_457_length_19557_cov_8_118347	None	gamma-carbonic anhydrase [EC:4.2.1.-]
791	Alistipes_sp009774895	Alistipes_sp009774895	K08659	9415	NODE_457_length_19557_cov_8_118347	None	dipeptidase [EC:3.4.-.-]
792	Alistipes_sp009774895	Alistipes_sp009774895	K06997	9414	NODE_457_length_19557_cov_8_118347	None	PLP dependent protein
793	Alistipes_sp009774895	Alistipes_sp009774895	K19824	1812	NODE_2484_length_7232_cov_7_205100	None	rubrerythrin
794	Alistipes_sp009774895	Alistipes_sp009774895	K04096	1782	NODE_183_length_31787_cov_9_376749	None	DNA processing protein
795	Alistipes_sp009774895	Alistipes_sp009774895	K03470	1791	NODE_183_length_31787_cov_9_376749	None	ribonuclease HII [EC:3.1.26.4]
796	Alistipes_sp009774895	Alistipes_sp009774895	K00639	1810	NODE_183_length_31787_cov_9_376749	None	glycine C-acetyltransferase [EC:2.3.1.29]
797	Alistipes_sp009774895	Alistipes_sp009774895	K03522	1815	NODE_2484_length_7232_cov_7_205100	None	electron transfer flavoprotein alpha subunit
798	Alistipes_sp009774895	Alistipes_sp009774895	K03521	1816	NODE_2484_length_7232_cov_7_205100	None	electron transfer flavoprotein beta subunit
799	Alistipes_sp009774895	Alistipes_sp009774895	K02834	1799	NODE_183_length_31787_cov_9_376749	None	ribosome-binding factor A
800	Alistipes_sp009774895	Alistipes_sp009774895	K03719	1809	NODE_183_length_31787_cov_9_376749	None	Lrp/AsnC family transcriptional regulator, leucine-responsive regulatory protein
801	Alistipes_sp009774895	Alistipes_sp009774895	K03718	1809	NODE_183_length_31787_cov_9_376749	None	Lrp/AsnC family transcriptional regulator, regulator for asnA, asnC and gidA
802	Alistipes_sp009774895	Alistipes_sp009774895	K01424	1784	NODE_183_length_31787_cov_9_376749	None	L-asparaginase [EC:3.5.1.1]
803	Alistipes_sp009774895	Alistipes_sp009774895	K20968	1793	NODE_183_length_31787_cov_9_376749	None	AraC family transcriptional regulator, exoenzyme S synthesis regulatory protein ExsA
804	Alistipes_sp009774895	Alistipes_sp009774895	K03106	7684	NODE_367_length_22214_cov_7_095672	None	signal recognition particle subunit SRP54 [EC:3.6.5.4]
805	Alistipes_sp009774895	Alistipes_sp009774895	K01934	7686	NODE_367_length_22214_cov_7_095672	None	5-formyltetrahydrofolate cyclo-ligase [EC:6.3.3.2]
806	Alistipes_sp009774895	Alistipes_sp009774895	K03703	7694	NODE_367_length_22214_cov_7_095672	None	excinuclease ABC subunit C
807	Alistipes_sp009774895	Alistipes_sp009774895	K13283	7681	NODE_367_length_22214_cov_7_095672	None	ferrous-iron efflux pump FieF
808	Alistipes_sp009774895	Alistipes_sp009774895	K09022	7679	NODE_367_length_22214_cov_7_095672	None	2-iminobutanoate/2-iminopropanoate deaminase [EC:3.5.99.10]
809	Alistipes_sp009774895	Alistipes_sp009774895	K02909	7691	NODE_367_length_22214_cov_7_095672	None	large subunit ribosomal protein L31
810	Alistipes_sp009774895	Alistipes_sp009774895	K01607	17103	NODE_1367_length_10618_cov_6_501373	None	4-carboxymuconolactone decarboxylase [EC:4.1.1.44]
811	Alistipes_sp009774895	Alistipes_sp009774895	K14742	17098	NODE_1367_length_10618_cov_6_501373	None	tRNA threonylcarbamoyladenosine biosynthesis protein TsaB
812	Alistipes_sp009774895	Alistipes_sp009774895	K03564	17064	NODE_41_length_58418_cov_7_187345	None	thioredoxin-dependent peroxiredoxin [EC:1.11.1.24]
813	Alistipes_sp009774895	Alistipes_sp009774895	K01921	17093	NODE_41_length_58418_cov_7_187345	None	D-alanine-D-alanine ligase [EC:6.3.2.4]
814	Alistipes_sp009774895	Alistipes_sp009774895	K03100	17053	NODE_41_length_58418_cov_7_187345	None	signal peptidase I [EC:3.4.21.89]
815	Alistipes_sp009774895	Alistipes_sp009774895	K03664	17097	NODE_1367_length_10618_cov_6_501373	None	SsrA-binding protein
816	Alistipes_sp009774895	Alistipes_sp009774895	K09812	17079	NODE_41_length_58418_cov_7_187345	None	cell division transport system ATP-binding protein
817	Alistipes_sp009774895	Alistipes_sp009774895	K08316	17071	NODE_41_length_58418_cov_7_187345	None	16S rRNA (guanine966-N2)-methyltransferase [EC:2.1.1.171]
818	Alistipes_sp009774895	Alistipes_sp009774895	K03555	17076	NODE_41_length_58418_cov_7_187345	None	DNA mismatch repair protein MutS
819	Alistipes_sp009774895	Alistipes_sp009774895	K02313	17061	NODE_41_length_58418_cov_7_187345	None	chromosomal replication initiator protein
820	Alistipes_sp009774895	Alistipes_sp009774895	K03218	17099	NODE_1367_length_10618_cov_6_501373	None	23S rRNA (guanosine2251-2'-O)-methyltransferase [EC:2.1.1.185]
821	Alistipes_sp009774895	Alistipes_sp009774895	K01744	17051	NODE_41_length_58418_cov_7_187345	None	aspartate ammonia-lyase [EC:4.3.1.1]
822	Alistipes_sp009774895	Alistipes_sp009774895	K02503	17068	NODE_41_length_58418_cov_7_187345	None	histidine triad (HIT) family protein
823	Alistipes_sp009774895	Alistipes_sp009774895	K03553	17065	NODE_41_length_58418_cov_7_187345	None	recombination protein RecA
824	Alistipes_sp009774895	Alistipes_sp009774895	K06173	17050	NODE_41_length_58418_cov_7_187345	None	tRNA pseudouridine38-40 synthase [EC:5.4.99.12]
825	Alistipes_sp009774895	Alistipes_sp009774895	K06158	17101	NODE_1367_length_10618_cov_6_501373	None	ATP-binding cassette, subfamily F, member 3
826	Alistipes_sp009774895	Alistipes_sp009774895	K02470	17078	NODE_41_length_58418_cov_7_187345	None	DNA gyrase subunit B [EC:5.6.2.2]
827	Alistipes_sp009774895	Alistipes_sp009774895	K02316	17096	NODE_1367_length_10618_cov_6_501373	None	DNA primase [EC:2.7.7.101]
828	Alistipes_sp009774895	Alistipes_sp009774895	K01144	17074	NODE_41_length_58418_cov_7_187345	None	exodeoxyribonuclease V [EC:3.1.11.5]
829	Alistipes_sp009774895	Alistipes_sp009774895	K02871	3688	NODE_224_length_28757_cov_7_778064	None	large subunit ribosomal protein L13
830	Alistipes_sp009774895	Alistipes_sp009774895	K22418	3712	NODE_224_length_28757_cov_7_778064	None	11beta/17beta-hydroxysteroid dehydrogenase [EC:1.1.1.146 1.1.1.-]
831	Alistipes_sp009774895	Alistipes_sp009774895	K01604	3702	NODE_224_length_28757_cov_7_778064	None	methylmalonyl-CoA decarboxylase subunit alpha [EC:7.2.4.3]
832	Alistipes_sp009774895	Alistipes_sp009774895	K20866	3691	NODE_224_length_28757_cov_7_778064	None	glucose-1-phosphatase [EC:3.1.3.10]
833	Alistipes_sp009774895	Alistipes_sp009774895	K20509	3705	NODE_224_length_28757_cov_7_778064	None	carboxybiotin decarboxylase [EC:7.2.4.1]
834	Alistipes_sp009774895	Alistipes_sp009774895	K03075	3718	NODE_3653_length_5544_cov_6_456549	None	preprotein translocase subunit SecG
835	Alistipes_sp009774895	Alistipes_sp009774895	K01886	3714	NODE_224_length_28757_cov_7_778064	None	glutaminyl-tRNA synthetase [EC:6.1.1.18]
836	Alistipes_sp009774895	Alistipes_sp009774895	K07588	3698	NODE_224_length_28757_cov_7_778064	None	LAO/AO transport system kinase [EC:2.7.-.-]
837	Alistipes_sp009774895	Alistipes_sp009774895	K12410	3695	NODE_224_length_28757_cov_7_778064	None	NAD-dependent deacetylase [EC:2.3.1.286]
838	Alistipes_sp009774895	Alistipes_sp009774895	K02996	3687	NODE_224_length_28757_cov_7_778064	None	small subunit ribosomal protein S9
839	Alistipes_sp009774895	Alistipes_sp009774895	K23352	3703	NODE_224_length_28757_cov_7_778064	None	glutaconyl-CoA/methylmalonyl-CoA decarboxylase subunit delta
840	Alistipes_sp009774895	Alistipes_sp009774895	K06167	3711	NODE_224_length_28757_cov_7_778064	None	phosphoribosyl 1,2-cyclic phosphate phosphodiesterase [EC:3.1.4.55]
841	Alistipes_sp009774895	Alistipes_sp009774895	K07124	3692	NODE_224_length_28757_cov_7_778064	None	uncharacterized protein
842	Alistipes_sp009774895	Alistipes_sp009774895	K03210	13349	NODE_792_length_14568_cov_7_763522	None	preprotein translocase subunit YajC
843	Alistipes_sp009774895	Alistipes_sp009774895	K02005	13697	NODE_910_length_13644_cov_7_938553	None	HlyD family secretion protein
844	Alistipes_sp009774895	Alistipes_sp009774895	K18700	13344	NODE_792_length_14568_cov_7_763522	None	fluoroacetyl-CoA thioesterase [EC:3.1.2.29]
845	Alistipes_sp009774895	Alistipes_sp009774895	K02851	13700	NODE_910_length_13644_cov_7_938553	None	UDP-GlcNAc:undecaprenyl-phosphate/decaprenyl-phosphate GlcNAc-1-phosphate transferase [EC:2.7.8.33 2.7.8.35]
846	Alistipes_sp009774895	Alistipes_sp009774895	K03595	13339	NODE_792_length_14568_cov_7_763522	None	GTPase
847	Alistipes_sp009774895	Alistipes_sp009774895	K03594	13345	NODE_792_length_14568_cov_7_763522	None	bacterioferritin [EC:1.16.3.1]
848	Alistipes_sp009774895	Alistipes_sp009774895	K03625	13351	NODE_792_length_14568_cov_7_763522	None	transcription antitermination protein NusB
849	Alistipes_sp009774895	Alistipes_sp009774895	K07277	2808	NODE_207_length_30329_cov_8_180881	None	outer membrane protein insertion porin family
850	Alistipes_sp009774895	Alistipes_sp009774895	K00858	2806	NODE_207_length_30329_cov_8_180881	None	NAD+ kinase [EC:2.7.1.23]
851	Alistipes_sp009774895	Alistipes_sp009774895	K10026	2788	NODE_207_length_30329_cov_8_180881	None	7-carboxy-7-deazaguanine synthase [EC:4.3.99.3]
852	Alistipes_sp009774895	Alistipes_sp009774895	K00974	2804	NODE_207_length_30329_cov_8_180881	None	tRNA nucleotidyltransferase (CCA-adding enzyme) [EC:2.7.7.72 3.1.3.- 3.1.4.-]
853	Alistipes_sp009774895	Alistipes_sp009774895	K07213	2785	NODE_207_length_30329_cov_8_180881	None	copper chaperone
854	Alistipes_sp009774895	Alistipes_sp009774895	K00970	2804	NODE_207_length_30329_cov_8_180881	None	poly(A) polymerase [EC:2.7.7.19]
855	Alistipes_sp009774895	Alistipes_sp009774895	K00806	2807	NODE_207_length_30329_cov_8_180881	None	undecaprenyl diphosphate synthase [EC:2.5.1.31]
856	Alistipes_sp009774895	Alistipes_sp009774895	K01338	2801	NODE_207_length_30329_cov_8_180881	None	ATP-dependent Lon protease [EC:3.4.21.53]
857	Alistipes_sp009774895	Alistipes_sp009774895	K03469	2803	NODE_207_length_30329_cov_8_180881	None	ribonuclease HI [EC:3.1.26.4]
858	Alistipes_sp009774895	Alistipes_sp009774895	K00760	2787	NODE_207_length_30329_cov_8_180881	None	hypoxanthine phosphoribosyltransferase [EC:2.4.2.8]
859	Alistipes_sp009774895	Alistipes_sp009774895	K01873	2802	NODE_207_length_30329_cov_8_180881	None	valyl-tRNA synthetase [EC:6.1.1.9]
860	Alistipes_sp009774895	Alistipes_sp009774895	K03787	2796	NODE_207_length_30329_cov_8_180881	None	5'-nucleotidase [EC:3.1.3.5]
861	Alistipes_sp009774895	Alistipes_sp009774895	K03593	2812	NODE_2760_length_6709_cov_8_556057	None	ATP-binding protein involved in chromosome partitioning
862	Alistipes_sp009774895	Alistipes_sp009774895	K04773	2811	NODE_2760_length_6709_cov_8_556057	None	protease IV [EC:3.4.21.-]
863	Alistipes_sp009774895	Alistipes_sp009774895	K01991	7020	NODE_332_length_23466_cov_6_985690	None	polysaccharide biosynthesis/export protein
864	Alistipes_sp009774895	Alistipes_sp009774895	K06518	7006	NODE_332_length_23466_cov_6_985690	None	holin-like protein
865	Alistipes_sp009774895	Alistipes_sp009774895	K04758	7002	NODE_332_length_23466_cov_6_985690	None	ferrous iron transport protein A
866	Alistipes_sp009774895	Alistipes_sp009774895	K04759	7002	NODE_332_length_23466_cov_6_985690	None	ferrous iron transport protein B
867	Alistipes_sp009774895	Alistipes_sp009774895	K07085	7008	NODE_332_length_23466_cov_6_985690	None	putative transport protein
868	Alistipes_sp009774895	Alistipes_sp009774895	K19005	16578	NODE_1293_length_11016_cov_6_881033	None	lipoteichoic acid synthase [EC:2.7.8.20]
869	Alistipes_sp009774895	Alistipes_sp009774895	K19005	85	NODE_89_length_42974_cov_9_696335	None	lipoteichoic acid synthase [EC:2.7.8.20]
870	Alistipes_sp009774895	Alistipes_sp009774895	K06927	139	NODE_1907_length_8556_cov_6_300200	None	diphthine-ammonia ligase [EC:6.3.1.14]
871	Alistipes_sp009774895	Alistipes_sp009774895	K06950	745	NODE_109_length_39689_cov_8_252309	None	uncharacterized protein
872	Alistipes_sp009774895	Alistipes_sp009774895	K03651	10569	NODE_474_length_19207_cov_7_797567	None	3',5'-cyclic-AMP phosphodiesterase [EC:3.1.4.53]
873	Alistipes_sp009774895	Alistipes_sp009774895	K03651	14450	NODE_1_length_146572_cov_8_806255	None	3',5'-cyclic-AMP phosphodiesterase [EC:3.1.4.53]
874	Alistipes_sp009774895	Alistipes_sp009774895	K03651	1310	NODE_178_length_32309_cov_8_518509	None	3',5'-cyclic-AMP phosphodiesterase [EC:3.1.4.53]
875	Alistipes_sp009774895	Alistipes_sp009774895	K02341	1804	NODE_183_length_31787_cov_9_376749	None	DNA polymerase III subunit delta' [EC:2.7.7.7]
876	Alistipes_sp009774895	Alistipes_sp009774895	K03455	2347	NODE_2545_length_7077_cov_7_591427	None	monovalent cation:H+ antiporter-2, CPA2 family
877	Alistipes_sp009774895	Alistipes_sp009774895	K01953	2348	NODE_2545_length_7077_cov_7_591427	None	asparagine synthase (glutamine-hydrolysing) [EC:6.3.5.4]
878	Alistipes_sp009774895	Alistipes_sp009774895	K06200	2791	NODE_207_length_30329_cov_8_180881	None	carbon starvation protein
879	Alistipes_sp009774895	Alistipes_sp009774895	K01303	3225	NODE_218_length_29263_cov_8_224219	None	acylaminoacyl-peptidase [EC:3.4.19.1]
880	Alistipes_sp009774895	Alistipes_sp009774895	K03530	15899	NODE_35_length_61761_cov_7_096004	None	DNA-binding protein HU-beta
881	Alistipes_sp009774895	Alistipes_sp009774895	K03530	3231	NODE_218_length_29263_cov_8_224219	None	DNA-binding protein HU-beta
882	Alistipes_sp009774895	Alistipes_sp009774895	K08301	3234	NODE_218_length_29263_cov_8_224219	None	ribonuclease G [EC:3.1.26.-]
883	Alistipes_sp009774895	Alistipes_sp009774895	K11719	3239	NODE_218_length_29263_cov_8_224219	None	lipopolysaccharide export system protein LptC
884	Alistipes_sp009774895	Alistipes_sp009774895	K12343	3694	NODE_224_length_28757_cov_7_778064	None	3-oxo-5-alpha-steroid 4-dehydrogenase 1 [EC:1.3.1.22]
885	Alistipes_sp009774895	Alistipes_sp009774895	K03296	3709	NODE_224_length_28757_cov_7_778064	None	hydrophobic/amphiphilic exporter-1 (mainly G- bacteria), HAE1 family
886	Alistipes_sp009774895	Alistipes_sp009774895	K03643	3720	NODE_3653_length_5544_cov_6_456549	None	LPS-assembly lipoprotein
887	Alistipes_sp009774895	Alistipes_sp009774895	K03386	4468	NODE_263_length_26288_cov_7_226470	None	peroxiredoxin 2/4 [EC:1.11.1.24]
888	Alistipes_sp009774895	Alistipes_sp009774895	K09015	4484	NODE_4323_length_4939_cov_7_179771	None	Fe-S cluster assembly protein SufD
889	Alistipes_sp009774895	Alistipes_sp009774895	K01139	5497	NODE_298_length_24846_cov_9_229841	None	GTP diphosphokinase / guanosine-3',5'-bis(diphosphate) 3'-diphosphatase [EC:2.7.6.5 3.1.7.2]
890	Alistipes_sp009774895	Alistipes_sp009774895	K01139	17066	NODE_41_length_58418_cov_7_187345	None	GTP diphosphokinase / guanosine-3',5'-bis(diphosphate) 3'-diphosphatase [EC:2.7.6.5 3.1.7.2]
891	Alistipes_sp009774895	Alistipes_sp009774895	K01430	5509	NODE_298_length_24846_cov_9_229841	None	urease subunit gamma [EC:3.5.1.5]
892	Alistipes_sp009774895	Alistipes_sp009774895	K05808	5518	NODE_298_length_24846_cov_9_229841	None	putative sigma-54 modulation protein
893	Alistipes_sp009774895	Alistipes_sp009774895	K15773	7023	NODE_332_length_23466_cov_6_985690	None	HTH-type transcriptional regulator / antitoxin HipB
894	Alistipes_sp009774895	Alistipes_sp009774895	K03298	7696	NODE_13666_length_2212_cov_6_087158	None	drug/metabolite transporter, DME family
895	Alistipes_sp009774895	Alistipes_sp009774895	K09774	8914	NODE_406_length_20809_cov_7_889612	None	lipopolysaccharide export system protein LptA
896	Alistipes_sp009774895	Alistipes_sp009774895	K14623	11624	NODE_525_length_18172_cov_7_509466	None	DNA-damage-inducible protein D
897	Alistipes_sp009774895	Alistipes_sp009774895	K13658	13336	NODE_792_length_14568_cov_7_763522	None	beta-1,4-mannosyltransferase [EC:2.4.1.251]
898	Alistipes_sp009774895	Alistipes_sp009774895	K02622	14067	NODE_914_length_13579_cov_6_382801	None	topoisomerase IV subunit B [EC:5.6.2.2]
899	Alistipes_sp009774895	Alistipes_sp009774895	K03587	14436	NODE_1_length_146572_cov_8_806255	None	cell division protein FtsI (penicillin-binding protein 3) [EC:3.4.16.4]
900	Alistipes_sp009774895	Alistipes_sp009774895	K03588	14440	NODE_1_length_146572_cov_8_806255	None	cell division protein FtsW
901	Alistipes_sp009774895	Alistipes_sp009774895	K19302	14452	NODE_1_length_146572_cov_8_806255	None	undecaprenyl-diphosphatase [EC:3.6.1.27]
902	Alistipes_sp009774895	Alistipes_sp009774895	K02016	14507	NODE_1_length_146572_cov_8_806255	None	iron complex transport system substrate-binding protein
903	Alistipes_sp009774895	Alistipes_sp009774895	K11941	16552	NODE_39_length_60036_cov_7_418116	None	glucans biosynthesis protein C [EC:2.1.-.-]
904	Alistipes_sp009774895	Alistipes_sp009774895	K11941	14860	NODE_5_length_114957_cov_9_480653	None	glucans biosynthesis protein C [EC:2.1.-.-]
905	Alistipes_sp009774895	Alistipes_sp009774895	K04084	14879	NODE_5_length_114957_cov_9_480653	None	thioredoxin:protein disulfide reductase [EC:1.8.4.16]
906	Alistipes_sp009774895	Alistipes_sp009774895	K09807	14939	NODE_5_length_114957_cov_9_480653	None	uncharacterized protein
907	Alistipes_sp009774895	Alistipes_sp009774895	K16898	15282	NODE_31_length_65208_cov_9_345019	None	ATP-dependent helicase/nuclease subunit A [EC:3.1.-.- 3.6.4.12]
908	Alistipes_sp009774895	Alistipes_sp009774895	K05366	15287	NODE_31_length_65208_cov_9_345019	None	penicillin-binding protein 1A [EC:2.4.1.129 3.4.16.4]
909	Alistipes_sp009774895	Alistipes_sp009774895	K23980	15632	NODE_1127_length_11909_cov_6_790535	None	cysteinylglycine-S-conjugate dipeptidase [EC:3.4.13.23]
910	Alistipes_sp009774895	Alistipes_sp009774895	K09815	15910	NODE_35_length_61761_cov_7_096004	None	zinc transport system substrate-binding protein
911	Alistipes_sp009774895	Alistipes_sp009774895	K13408	15929	NODE_35_length_61761_cov_7_096004	None	membrane fusion protein
912	Alistipes_sp009774895	Alistipes_sp009774895	K01840	15948	NODE_35_length_61761_cov_7_096004	None	phosphomannomutase [EC:5.4.2.8]
913	Alistipes_sp009774895	Alistipes_sp009774895	K11392	15951	NODE_1266_length_11105_cov_8_618190	None	16S rRNA (cytosine1407-C5)-methyltransferase [EC:2.1.1.178]
914	Alistipes_sp009774895	Alistipes_sp009774895	K13566	16555	NODE_39_length_60036_cov_7_418116	None	omega-amidase [EC:3.5.1.3]
915	Alistipes_sp009774895	Alistipes_sp009774895	K06889	17104	NODE_1367_length_10618_cov_6_501373	None	uncharacterized protein
916	Alistipes_sp009774895	Alistipes_sp009774895	K01537	17530	NODE_48_length_53782_cov_8_950453	None	P-type Ca2+ transporter type 2C [EC:7.2.2.10]
917	Alistipes_sp009774895	Alistipes_sp009774895	K00634	17568	NODE_1455_length_10192_cov_7_470948	None	phosphate butyryltransferase [EC:2.3.1.19]
918	Alistipes_sp009774895	Alistipes_sp009774895	K09888	18072	NODE_52_length_52524_cov_9_748633	None	cell division protein ZapA
919	Alistipes_sp009774895	Alistipes_sp009774895	K11537	19128	NODE_60_length_49498_cov_7_333252	None	MFS transporter, NHS family, xanthosine permease
920	Alistipes_sp009774895	Alistipes_sp009774895	K22300	19132	NODE_60_length_49498_cov_7_333252	None	HTH-type transcriptional regulator, cell division transcriptional repressor
0	COE1_sp002358575	COE1_sp002358575	K21071	17482	NODE_59_length_21357_cov_30_720026	M00001	ATP-dependent phosphofructokinase / diphosphate-dependent phosphofructokinase [EC:2.7.1.11 2.7.1.90]
1	COE1_sp002358575	COE1_sp002358575	K21071	16219	NODE_1_length_310843_cov_41_188463	M00001	ATP-dependent phosphofructokinase / diphosphate-dependent phosphofructokinase [EC:2.7.1.11 2.7.1.90]
2	COE1_sp002358575	COE1_sp002358575	K01810	19014	NODE_6_length_217817_cov_47_846323	M00001,M00004,M00892,M00909	glucose-6-phosphate isomerase [EC:5.3.1.9]
3	COE1_sp002358575	COE1_sp002358575	K00927	13993	NODE_42_length_44558_cov_29_045278	M00001,M00002,M00003,M00308,M00552,M00165,M00166,M00611,M00612	phosphoglycerate kinase [EC:2.7.2.3]
4	COE1_sp002358575	COE1_sp002358575	K00134	13994	NODE_42_length_44558_cov_29_045278	M00001,M00002,M00003,M00308,M00552,M00165,M00166,M00611,M00612	glyceraldehyde 3-phosphate dehydrogenase [EC:1.2.1.12]
5	COE1_sp002358575	COE1_sp002358575	K01624	19603	NODE_7_length_184084_cov_31_685512	M00001,M00003,M00165,M00167,M00345,M00344,M00611,M00612	fructose-bisphosphate aldolase, class II [EC:4.1.2.13]
6	COE1_sp002358575	COE1_sp002358575	K15633	3575	NODE_15_length_152018_cov_30_070583	M00001,M00002,M00003	2,3-bisphosphoglycerate-independent phosphoglycerate mutase [EC:5.4.2.12]
7	COE1_sp002358575	COE1_sp002358575	K00845	4720	NODE_20_length_104815_cov_34_771325	M00001,M00549,M00892,M00909	glucokinase [EC:2.7.1.2]
8	COE1_sp002358575	COE1_sp002358575	K00845	7583	NODE_24_length_84148_cov_32_163034	M00001,M00549,M00892,M00909	glucokinase [EC:2.7.1.2]
9	COE1_sp002358575	COE1_sp002358575	K00845	13287	NODE_40_length_45171_cov_34_006805	M00001,M00549,M00892,M00909	glucokinase [EC:2.7.1.2]
10	COE1_sp002358575	COE1_sp002358575	K01803	13992	NODE_42_length_44558_cov_29_045278	M00001,M00002,M00003	triosephosphate isomerase (TIM) [EC:5.3.1.1]
11	COE1_sp002358575	COE1_sp002358575	K01689	16756	NODE_2_length_254332_cov_28_949484	M00001,M00002,M00003,M00346	enolase [EC:4.2.1.11]
12	COE1_sp002358575	COE1_sp002358575	K00873	8792	NODE_29_length_66002_cov_45_489469	M00001,M00002,M00049,M00050	pyruvate kinase [EC:2.7.1.40]
13	COE1_sp002358575	COE1_sp002358575	K01610	17792	NODE_4_length_244402_cov_28_435774	M00003,M00170	phosphoenolpyruvate carboxykinase (ATP) [EC:4.1.1.49]
14	COE1_sp002358575	COE1_sp002358575	K04041	18431	NODE_5_length_232515_cov_36_962832	M00003,M00611,M00612	fructose-1,6-bisphosphatase III [EC:3.1.3.11]
15	COE1_sp002358575	COE1_sp002358575	K00171	14341	NODE_43_length_44318_cov_30_840544	M00307,M00173,M00374,M00620,M00614	pyruvate ferredoxin oxidoreductase delta subunit [EC:1.2.7.1]
16	COE1_sp002358575	COE1_sp002358575	K00172	14340	NODE_43_length_44318_cov_30_840544	M00307,M00173,M00374,M00620,M00614	pyruvate ferredoxin oxidoreductase gamma subunit [EC:1.2.7.1]
17	COE1_sp002358575	COE1_sp002358575	K00172	20142	NODE_8_length_170500_cov_36_861334	M00307,M00173,M00374,M00620,M00614	pyruvate ferredoxin oxidoreductase gamma subunit [EC:1.2.7.1]
18	COE1_sp002358575	COE1_sp002358575	K00169	14342	NODE_43_length_44318_cov_30_840544	M00307,M00173,M00374,M00620,M00614	pyruvate ferredoxin oxidoreductase alpha subunit [EC:1.2.7.1]
19	COE1_sp002358575	COE1_sp002358575	K00169	20143	NODE_8_length_170500_cov_36_861334	M00307,M00173,M00374,M00620,M00614	pyruvate ferredoxin oxidoreductase alpha subunit [EC:1.2.7.1]
20	COE1_sp002358575	COE1_sp002358575	K00170	14343	NODE_43_length_44318_cov_30_840544	M00307,M00173,M00374,M00620,M00614	pyruvate ferredoxin oxidoreductase beta subunit [EC:1.2.7.1]
21	COE1_sp002358575	COE1_sp002358575	K01647	17283	NODE_3_length_245677_cov_33_343463	M00009,M00010,M00012,M00740	citrate synthase [EC:2.3.3.1]
22	COE1_sp002358575	COE1_sp002358575	K00031	17356	NODE_3_length_245677_cov_33_343463	M00009,M00010,M00740,M00173,M00614	isocitrate dehydrogenase [EC:1.1.1.42]
23	COE1_sp002358575	COE1_sp002358575	K01678	9940	NODE_31_length_58868_cov_53_529152	M00009,M00011,M00173,M00374,M00620,M00613,M00614	fumarate hydratase subunit beta [EC:4.2.1.2]
24	COE1_sp002358575	COE1_sp002358575	K01677	9937	NODE_31_length_58868_cov_53_529152	M00009,M00011,M00173,M00374,M00620,M00613,M00614	fumarate hydratase subunit alpha [EC:4.2.1.2]
25	COE1_sp002358575	COE1_sp002358575	K05942	17354	NODE_3_length_245677_cov_33_343463	M00009,M00010	citrate (Re)-synthase [EC:2.3.3.3]
26	COE1_sp002358575	COE1_sp002358575	K07404	17787	NODE_4_length_244402_cov_28_435774	M00004,M00006,M00008	6-phosphogluconolactonase [EC:3.1.1.31]
27	COE1_sp002358575	COE1_sp002358575	K00615	13296	NODE_40_length_45171_cov_34_006805	M00004,M00007,M00165,M00167,M00611,M00612	transketolase [EC:2.2.1.1]
28	COE1_sp002358575	COE1_sp002358575	K00615	1140	NODE_10_length_168523_cov_33_488116	M00004,M00007,M00165,M00167,M00611,M00612	transketolase [EC:2.2.1.1]
29	COE1_sp002358575	COE1_sp002358575	K00615	13295	NODE_40_length_45171_cov_34_006805	M00004,M00007,M00165,M00167,M00611,M00612	transketolase [EC:2.2.1.1]
30	COE1_sp002358575	COE1_sp002358575	K01783	2118	NODE_12_length_162894_cov_27_263954	M00004,M00007	ribulose-phosphate 3-epimerase [EC:5.1.3.1]
31	COE1_sp002358575	COE1_sp002358575	K01808	4314	NODE_19_length_114258_cov_32_274616	M00004,M00007,M00165,M00167,M00611,M00612	ribose 5-phosphate isomerase B [EC:5.3.1.6]
32	COE1_sp002358575	COE1_sp002358575	K00948	16392	NODE_1_length_310843_cov_41_188463	M00005	ribose-phosphate pyrophosphokinase [EC:2.7.6.1]
33	COE1_sp002358575	COE1_sp002358575	K00948	570	NODE_9_length_169421_cov_26_785175	M00005	ribose-phosphate pyrophosphokinase [EC:2.7.6.1]
34	COE1_sp002358575	COE1_sp002358575	K00948	4373	NODE_19_length_114258_cov_32_274616	M00005	ribose-phosphate pyrophosphokinase [EC:2.7.6.1]
35	COE1_sp002358575	COE1_sp002358575	K01625	11540	NODE_34_length_54257_cov_30_003671	M00008,M00308,M00631,M00061	2-dehydro-3-deoxyphosphogluconate aldolase / (4S)-4-hydroxy-2-oxoglutarate aldolase [EC:4.1.2.14 4.1.3.42]
36	COE1_sp002358575	COE1_sp002358575	K00874	11538	NODE_34_length_54257_cov_30_003671	M00308,M00631,M00061	2-dehydro-3-deoxygluconokinase [EC:2.7.1.45]
37	COE1_sp002358575	COE1_sp002358575	K00874	4717	NODE_20_length_104815_cov_34_771325	M00308,M00631,M00061	2-dehydro-3-deoxygluconokinase [EC:2.7.1.45]
38	COE1_sp002358575	COE1_sp002358575	K00012	6921	NODE_23_length_87707_cov_31_767250	M00014,M00129	UDPglucose 6-dehydrogenase [EC:1.1.1.22]
39	COE1_sp002358575	COE1_sp002358575	K00854	18951	NODE_6_length_217817_cov_47_846323	M00014	xylulokinase [EC:2.7.1.17]
40	COE1_sp002358575	COE1_sp002358575	K00041	11536	NODE_34_length_54257_cov_30_003671	M00631	tagaturonate reductase [EC:1.1.1.58]
41	COE1_sp002358575	COE1_sp002358575	K01685	11537	NODE_34_length_54257_cov_30_003671	M00631	altronate hydrolase [EC:4.2.1.7]
42	COE1_sp002358575	COE1_sp002358575	K01812	2134	NODE_12_length_162894_cov_27_263954	M00631,M00061	glucuronate isomerase [EC:5.3.1.12]
43	COE1_sp002358575	COE1_sp002358575	K00040	4366	NODE_19_length_114258_cov_32_274616	M00061	fructuronate reductase [EC:1.1.1.57]
44	COE1_sp002358575	COE1_sp002358575	K01686	7563	NODE_24_length_84148_cov_32_163034	M00061	mannonate dehydratase [EC:4.2.1.8]
45	COE1_sp002358575	COE1_sp002358575	K01686	7564	NODE_24_length_84148_cov_32_163034	M00061	mannonate dehydratase [EC:4.2.1.8]
46	COE1_sp002358575	COE1_sp002358575	K01051	17836	NODE_4_length_244402_cov_28_435774	M00081	pectinesterase [EC:3.1.1.11]
47	COE1_sp002358575	COE1_sp002358575	K01051	16407	NODE_1_length_310843_cov_41_188463	M00081	pectinesterase [EC:3.1.1.11]
48	COE1_sp002358575	COE1_sp002358575	K01785	12843	NODE_39_length_45945_cov_35_193702	M00632	aldose 1-epimerase [EC:5.1.3.3]
49	COE1_sp002358575	COE1_sp002358575	K01784	554	NODE_9_length_169421_cov_26_785175	M00632	UDP-glucose 4-epimerase [EC:5.1.3.2]
50	COE1_sp002358575	COE1_sp002358575	K01784	16391	NODE_1_length_310843_cov_41_188463	M00632	UDP-glucose 4-epimerase [EC:5.1.3.2]
51	COE1_sp002358575	COE1_sp002358575	K01809	19602	NODE_7_length_184084_cov_31_685512	M00114	mannose-6-phosphate isomerase [EC:5.3.1.8]
52	COE1_sp002358575	COE1_sp002358575	K01809	4731	NODE_20_length_104815_cov_34_771325	M00114	mannose-6-phosphate isomerase [EC:5.3.1.8]
53	COE1_sp002358575	COE1_sp002358575	K03077	13297	NODE_40_length_45171_cov_34_006805	M00550	L-ribulose-5-phosphate 4-epimerase [EC:5.1.3.4]
54	COE1_sp002358575	COE1_sp002358575	K03079	17835	NODE_4_length_244402_cov_28_435774	M00550	L-ribulose-5-phosphate 3-epimerase [EC:5.1.3.22]
55	COE1_sp002358575	COE1_sp002358575	K00975	16443	NODE_1_length_310843_cov_41_188463	M00854,M00565	glucose-1-phosphate adenylyltransferase [EC:2.7.7.27]
56	COE1_sp002358575	COE1_sp002358575	K00975	16396	NODE_1_length_310843_cov_41_188463	M00854,M00565	glucose-1-phosphate adenylyltransferase [EC:2.7.7.27]
57	COE1_sp002358575	COE1_sp002358575	K00975	16397	NODE_1_length_310843_cov_41_188463	M00854,M00565	glucose-1-phosphate adenylyltransferase [EC:2.7.7.27]
58	COE1_sp002358575	COE1_sp002358575	K00975	16444	NODE_1_length_310843_cov_41_188463	M00854,M00565	glucose-1-phosphate adenylyltransferase [EC:2.7.7.27]
59	COE1_sp002358575	COE1_sp002358575	K00703	9340	NODE_30_length_61880_cov_33_616013	M00854,M00565	starch synthase [EC:2.4.1.21]
60	COE1_sp002358575	COE1_sp002358575	K00700	19066	NODE_70_length_17607_cov_36_690292	M00854,M00565	1,4-alpha-glucan branching enzyme [EC:2.4.1.18]
61	COE1_sp002358575	COE1_sp002358575	K00705	6925	NODE_23_length_87707_cov_31_767250	M00855	4-alpha-glucanotransferase [EC:2.4.1.25]
62	COE1_sp002358575	COE1_sp002358575	K00705	19055	NODE_6_length_217817_cov_47_846323	M00855	4-alpha-glucanotransferase [EC:2.4.1.25]
63	COE1_sp002358575	COE1_sp002358575	K01200	4336	NODE_19_length_114258_cov_32_274616	M00855	pullulanase [EC:3.2.1.41]
64	COE1_sp002358575	COE1_sp002358575	K01835	2579	NODE_13_length_156099_cov_29_167568	M00855,M00549	phosphoglucomutase [EC:5.4.2.2]
65	COE1_sp002358575	COE1_sp002358575	K00688	2121	NODE_12_length_162894_cov_27_263954	M00855	glycogen phosphorylase [EC:2.4.1.1]
66	COE1_sp002358575	COE1_sp002358575	K00688	8813	NODE_29_length_66002_cov_45_489469	M00855	glycogen phosphorylase [EC:2.4.1.1]
67	COE1_sp002358575	COE1_sp002358575	K00972	15847	NODE_52_length_25856_cov_36_804891	M00892	UDP-N-acetylglucosamine/UDP-N-acetylgalactosamine diphosphorylase [EC:2.7.7.23 2.7.7.83]
68	COE1_sp002358575	COE1_sp002358575	K00820	2586	NODE_13_length_156099_cov_29_167568	M00892,M00909	glutamine---fructose-6-phosphate transaminase (isomerizing) [EC:2.6.1.16]
69	COE1_sp002358575	COE1_sp002358575	K03431	1569	NODE_11_length_165420_cov_36_304478	M00909	phosphoglucosamine mutase [EC:5.4.2.10]
70	COE1_sp002358575	COE1_sp002358575	K00626	6100	NODE_22_length_91632_cov_44_239219	M00373,M00375,M00374,M00088,M00095,M00849	acetyl-CoA C-acetyltransferase [EC:2.3.1.9]
71	COE1_sp002358575	COE1_sp002358575	K00600	10488	NODE_32_length_57058_cov_26_586952	M00532,M00346,M00140,M00141	glycine hydroxymethyltransferase [EC:2.1.2.1]
72	COE1_sp002358575	COE1_sp002358575	K00248	6103	NODE_22_length_91632_cov_44_239219	M00013	butyryl-CoA dehydrogenase [EC:1.3.8.1]
73	COE1_sp002358575	COE1_sp002358575	K01092	15860	NODE_52_length_25856_cov_36_804891	M00131	myo-inositol-1(or 4)-monophosphatase [EC:3.1.3.25]
74	COE1_sp002358575	COE1_sp002358575	K01006	3536	NODE_15_length_152018_cov_30_070583	M00169,M00172,M00171,M00173,M00614	pyruvate, orthophosphate dikinase [EC:2.7.9.1]
75	COE1_sp002358575	COE1_sp002358575	K01963	4329	NODE_19_length_114258_cov_32_274616	M00376,M00082,M00613	acetyl-CoA carboxylase carboxyl transferase subunit beta [EC:6.4.1.2 2.1.3.15]
76	COE1_sp002358575	COE1_sp002358575	K01962	4329	NODE_19_length_114258_cov_32_274616	M00376,M00082,M00613	acetyl-CoA carboxylase carboxyl transferase subunit alpha [EC:6.4.1.2 2.1.3.15]
77	COE1_sp002358575	COE1_sp002358575	K01938	3016	NODE_14_length_153927_cov_29_889811	M00377,M00140,M00618	formate--tetrahydrofolate ligase [EC:6.3.4.3]
78	COE1_sp002358575	COE1_sp002358575	K00297	3570	NODE_15_length_152018_cov_30_070583	M00377,M00618	methylenetetrahydrofolate reductase (NADPH) [EC:1.5.1.20]
79	COE1_sp002358575	COE1_sp002358575	K01491	7578	NODE_24_length_84148_cov_32_163034	M00377,M00140,M00618	methylenetetrahydrofolate dehydrogenase (NADP+) / methenyltetrahydrofolate cyclohydrolase [EC:1.5.1.5 3.5.4.9]
80	COE1_sp002358575	COE1_sp002358575	K00625	16894	NODE_2_length_254332_cov_28_949484	M00579,M00357,M00617,M00618	phosphate acetyltransferase [EC:2.3.1.8]
81	COE1_sp002358575	COE1_sp002358575	K00925	13299	NODE_40_length_45171_cov_34_006805	M00579,M00357,M00617,M00618	acetate kinase [EC:2.7.2.1]
82	COE1_sp002358575	COE1_sp002358575	K02115	16192	NODE_1_length_310843_cov_41_188463	M00157	F-type H+-transporting ATPase subunit gamma
83	COE1_sp002358575	COE1_sp002358575	K02114	16194	NODE_1_length_310843_cov_41_188463	M00157	F-type H+-transporting ATPase subunit epsilon
84	COE1_sp002358575	COE1_sp002358575	K02108	16187	NODE_1_length_310843_cov_41_188463	M00157	F-type H+-transporting ATPase subunit a
85	COE1_sp002358575	COE1_sp002358575	K02109	16189	NODE_1_length_310843_cov_41_188463	M00157	F-type H+-transporting ATPase subunit b
86	COE1_sp002358575	COE1_sp002358575	K02110	16188	NODE_1_length_310843_cov_41_188463	M00157	F-type H+-transporting ATPase subunit c
87	COE1_sp002358575	COE1_sp002358575	K02111	16191	NODE_1_length_310843_cov_41_188463	M00157	F-type H+/Na+-transporting ATPase subunit alpha [EC:7.1.2.2 7.2.2.1]
88	COE1_sp002358575	COE1_sp002358575	K02112	16193	NODE_1_length_310843_cov_41_188463	M00157	F-type H+/Na+-transporting ATPase subunit beta [EC:7.1.2.2 7.2.2.1]
89	COE1_sp002358575	COE1_sp002358575	K02113	16190	NODE_1_length_310843_cov_41_188463	M00157	F-type H+-transporting ATPase subunit delta
90	COE1_sp002358575	COE1_sp002358575	K00645	4325	NODE_19_length_114258_cov_32_274616	M00082,M00873,M00874	[acyl-carrier-protein] S-malonyltransferase [EC:2.3.1.39]
91	COE1_sp002358575	COE1_sp002358575	K00648	4331	NODE_19_length_114258_cov_32_274616	M00082	3-oxoacyl-[acyl-carrier-protein] synthase III [EC:2.3.1.180]
92	COE1_sp002358575	COE1_sp002358575	K02372	4328	NODE_19_length_114258_cov_32_274616	M00083,M00572	3-hydroxyacyl-[acyl-carrier-protein] dehydratase [EC:4.2.1.59]
93	COE1_sp002358575	COE1_sp002358575	K02371	4324	NODE_19_length_114258_cov_32_274616	M00083	enoyl-[acyl-carrier protein] reductase II [EC:1.3.1.9]
94	COE1_sp002358575	COE1_sp002358575	K09458	4327	NODE_19_length_114258_cov_32_274616	M00083,M00873,M00874,M00572	3-oxoacyl-[acyl-carrier-protein] synthase II [EC:2.3.1.179]
95	COE1_sp002358575	COE1_sp002358575	K00059	4326	NODE_19_length_114258_cov_32_274616	M00083,M00874,M00572	3-oxoacyl-[acyl-carrier protein] reductase [EC:1.1.1.100]
96	COE1_sp002358575	COE1_sp002358575	K01897	3909	NODE_17_length_124411_cov_36_225466	M00086	long-chain acyl-CoA synthetase [EC:6.2.1.3]
97	COE1_sp002358575	COE1_sp002358575	K01692	6101	NODE_22_length_91632_cov_44_239219	M00087,M00878	enoyl-CoA hydratase [EC:4.2.1.17]
98	COE1_sp002358575	COE1_sp002358575	K00249	6103	NODE_22_length_91632_cov_44_239219	M00087,M00036	acyl-CoA dehydrogenase [EC:1.3.8.7]
99	COE1_sp002358575	COE1_sp002358575	K00655	13277	NODE_40_length_45171_cov_34_006805	M00089	1-acyl-sn-glycerol-3-phosphate acyltransferase [EC:2.3.1.51]
100	COE1_sp002358575	COE1_sp002358575	K01054	16485	NODE_53_length_25696_cov_32_287274	M00098	acylglycerol lipase [EC:3.1.1.23]
101	COE1_sp002358575	COE1_sp002358575	K00981	11992	NODE_36_length_52946_cov_27_366357	M00093	phosphatidate cytidylyltransferase [EC:2.7.7.41]
102	COE1_sp002358575	COE1_sp002358575	K01933	6937	NODE_23_length_87707_cov_31_767250	M00048	phosphoribosylformylglycinamidine cyclo-ligase [EC:6.3.3.1]
103	COE1_sp002358575	COE1_sp002358575	K11176	2189	NODE_12_length_162894_cov_27_263954	M00048	IMP cyclohydrolase [EC:3.5.4.10]
104	COE1_sp002358575	COE1_sp002358575	K01923	3071	NODE_14_length_153927_cov_29_889811	M00048	phosphoribosylaminoimidazole-succinocarboxamide synthase [EC:6.3.2.6]
105	COE1_sp002358575	COE1_sp002358575	K01756	3073	NODE_14_length_153927_cov_29_889811	M00048,M00049	adenylosuccinate lyase [EC:4.3.2.2]
106	COE1_sp002358575	COE1_sp002358575	K11175	6938	NODE_23_length_87707_cov_31_767250	M00048	phosphoribosylglycinamide formyltransferase 1 [EC:2.1.2.2]
107	COE1_sp002358575	COE1_sp002358575	K01945	6939	NODE_23_length_87707_cov_31_767250	M00048	phosphoribosylamine---glycine ligase [EC:6.3.4.13]
108	COE1_sp002358575	COE1_sp002358575	K00602	2190	NODE_12_length_162894_cov_27_263954	M00048	phosphoribosylaminoimidazolecarboxamide formyltransferase / IMP cyclohydrolase [EC:2.1.2.3 3.5.4.10]
109	COE1_sp002358575	COE1_sp002358575	K00764	3072	NODE_14_length_153927_cov_29_889811	M00048	amidophosphoribosyltransferase [EC:2.4.2.14]
110	COE1_sp002358575	COE1_sp002358575	K00764	2165	NODE_12_length_162894_cov_27_263954	M00048	amidophosphoribosyltransferase [EC:2.4.2.14]
111	COE1_sp002358575	COE1_sp002358575	K01952	2168	NODE_12_length_162894_cov_27_263954	M00048	phosphoribosylformylglycinamidine synthase [EC:6.3.5.3]
112	COE1_sp002358575	COE1_sp002358575	K01588	6936	NODE_23_length_87707_cov_31_767250	M00048	5-(carboxyamino)imidazole ribonucleotide mutase [EC:5.4.99.18]
113	COE1_sp002358575	COE1_sp002358575	K01939	3074	NODE_14_length_153927_cov_29_889811	M00049	adenylosuccinate synthase [EC:6.3.4.4]
114	COE1_sp002358575	COE1_sp002358575	K00939	5321	NODE_21_length_104165_cov_45_301162	M00049	adenylate kinase [EC:2.7.4.3]
115	COE1_sp002358575	COE1_sp002358575	K00088	14338	NODE_43_length_44318_cov_30_840544	M00050	IMP dehydrogenase [EC:1.1.1.205]
116	COE1_sp002358575	COE1_sp002358575	K01951	18493	NODE_69_length_17837_cov_34_971263	M00050	GMP synthase (glutamine-hydrolysing) [EC:6.3.5.2]
117	COE1_sp002358575	COE1_sp002358575	K00609	17890	NODE_4_length_244402_cov_28_435774	M00051	aspartate carbamoyltransferase catalytic subunit [EC:2.1.3.2]
118	COE1_sp002358575	COE1_sp002358575	K01956	9350	NODE_30_length_61880_cov_33_616013	M00051	carbamoyl-phosphate synthase small subunit [EC:6.3.5.5]
119	COE1_sp002358575	COE1_sp002358575	K01591	6931	NODE_23_length_87707_cov_31_767250	M00051	orotidine-5'-phosphate decarboxylase [EC:4.1.1.23]
120	COE1_sp002358575	COE1_sp002358575	K01465	13275	NODE_40_length_45171_cov_34_006805	M00051	dihydroorotase [EC:3.5.2.3]
121	COE1_sp002358575	COE1_sp002358575	K01955	16827	NODE_2_length_254332_cov_28_949484	M00051	carbamoyl-phosphate synthase large subunit [EC:6.3.5.5]
122	COE1_sp002358575	COE1_sp002358575	K01955	9349	NODE_30_length_61880_cov_33_616013	M00051	carbamoyl-phosphate synthase large subunit [EC:6.3.5.5]
123	COE1_sp002358575	COE1_sp002358575	K00610	17891	NODE_4_length_244402_cov_28_435774	M00051	aspartate carbamoyltransferase regulatory subunit
124	COE1_sp002358575	COE1_sp002358575	K17828	13293	NODE_40_length_45171_cov_34_006805	M00051	dihydroorotate dehydrogenase (NAD+) catalytic subunit [EC:1.3.1.14]
125	COE1_sp002358575	COE1_sp002358575	K00762	6932	NODE_23_length_87707_cov_31_767250	M00051	orotate phosphoribosyltransferase [EC:2.4.2.10]
126	COE1_sp002358575	COE1_sp002358575	K01937	19604	NODE_7_length_184084_cov_31_685512	M00052	CTP synthase [EC:6.3.4.2]
127	COE1_sp002358575	COE1_sp002358575	K09903	11989	NODE_36_length_52946_cov_27_366357	M00052	uridylate kinase [EC:2.7.4.22]
128	COE1_sp002358575	COE1_sp002358575	K21636	2104	NODE_12_length_162894_cov_27_263954	M00053	ribonucleoside-triphosphate reductase (formate) [EC:1.1.98.6]
129	COE1_sp002358575	COE1_sp002358575	K21636	2105	NODE_12_length_162894_cov_27_263954	M00053	ribonucleoside-triphosphate reductase (formate) [EC:1.1.98.6]
130	COE1_sp002358575	COE1_sp002358575	K21636	6930	NODE_23_length_87707_cov_31_767250	M00053	ribonucleoside-triphosphate reductase (formate) [EC:1.1.98.6]
131	COE1_sp002358575	COE1_sp002358575	K21636	10507	NODE_32_length_57058_cov_26_586952	M00053	ribonucleoside-triphosphate reductase (formate) [EC:1.1.98.6]
132	COE1_sp002358575	COE1_sp002358575	K01520	16755	NODE_2_length_254332_cov_28_949484	M00053	dUTP pyrophosphatase [EC:3.6.1.23]
133	COE1_sp002358575	COE1_sp002358575	K01520	2108	NODE_12_length_162894_cov_27_263954	M00053	dUTP pyrophosphatase [EC:3.6.1.23]
134	COE1_sp002358575	COE1_sp002358575	K00058	17778	NODE_4_length_244402_cov_28_435774	M00020	D-3-phosphoglycerate dehydrogenase / 2-oxoglutarate reductase [EC:1.1.1.95 1.1.1.399]
135	COE1_sp002358575	COE1_sp002358575	K00831	12856	NODE_39_length_45945_cov_35_193702	M00020,M00124	phosphoserine aminotransferase [EC:2.6.1.52]
136	COE1_sp002358575	COE1_sp002358575	K00831	17779	NODE_4_length_244402_cov_28_435774	M00020,M00124	phosphoserine aminotransferase [EC:2.6.1.52]
137	COE1_sp002358575	COE1_sp002358575	K02203	16382	NODE_1_length_310843_cov_41_188463	M00020,M00018	phosphoserine / homoserine phosphotransferase [EC:3.1.3.3 2.7.1.39]
138	COE1_sp002358575	COE1_sp002358575	K00003	19468	NODE_7_length_184084_cov_31_685512	M00018,M00017	homoserine dehydrogenase [EC:1.1.1.3]
139	COE1_sp002358575	COE1_sp002358575	K00928	19467	NODE_7_length_184084_cov_31_685512	M00018,M00033,M00017,M00016,M00525,M00526,M00527	aspartate kinase [EC:2.7.2.4]
140	COE1_sp002358575	COE1_sp002358575	K01733	17796	NODE_4_length_244402_cov_28_435774	M00018	threonine synthase [EC:4.2.3.1]
141	COE1_sp002358575	COE1_sp002358575	K00133	16973	NODE_2_length_254332_cov_28_949484	M00018,M00033,M00017,M00016,M00525,M00526,M00527	aspartate-semialdehyde dehydrogenase [EC:1.2.1.11]
142	COE1_sp002358575	COE1_sp002358575	K00640	10476	NODE_32_length_57058_cov_26_586952	M00021	serine O-acetyltransferase [EC:2.3.1.30]
143	COE1_sp002358575	COE1_sp002358575	K01738	16198	NODE_1_length_310843_cov_41_188463	M00021	cysteine synthase [EC:2.5.1.47]
144	COE1_sp002358575	COE1_sp002358575	K07173	17864	NODE_4_length_244402_cov_28_435774	M00609	S-ribosylhomocysteine lyase [EC:4.4.1.21]
145	COE1_sp002358575	COE1_sp002358575	K00789	6121	NODE_22_length_91632_cov_44_239219	M00609,M00034,M00035,M00368	S-adenosylmethionine synthetase [EC:2.5.1.6]
146	COE1_sp002358575	COE1_sp002358575	K01243	18901	NODE_6_length_217817_cov_47_846323	M00609,M00034	adenosylhomocysteine nucleosidase [EC:3.2.2.9]
147	COE1_sp002358575	COE1_sp002358575	K01243	6159	NODE_22_length_91632_cov_44_239219	M00609,M00034	adenosylhomocysteine nucleosidase [EC:3.2.2.9]
148	COE1_sp002358575	COE1_sp002358575	K00548	17824	NODE_4_length_244402_cov_28_435774	M00017	5-methyltetrahydrofolate--homocysteine methyltransferase [EC:2.1.1.13]
149	COE1_sp002358575	COE1_sp002358575	K00651	4686	NODE_20_length_104815_cov_34_771325	M00017	homoserine O-succinyltransferase/O-acetyltransferase [EC:2.3.1.46 2.3.1.31]
150	COE1_sp002358575	COE1_sp002358575	K00558	2624	NODE_13_length_156099_cov_29_167568	M00035	DNA (cytosine-5)-methyltransferase 1 [EC:2.1.1.37]
151	COE1_sp002358575	COE1_sp002358575	K00558	484	NODE_9_length_169421_cov_26_785175	M00035	DNA (cytosine-5)-methyltransferase 1 [EC:2.1.1.37]
152	COE1_sp002358575	COE1_sp002358575	K00053	16875	NODE_2_length_254332_cov_28_949484	M00019,M00570	ketol-acid reductoisomerase [EC:1.1.1.86]
153	COE1_sp002358575	COE1_sp002358575	K00826	3915	NODE_17_length_124411_cov_36_225466	M00019,M00570,M00036,M00119	branched-chain amino acid aminotransferase [EC:2.6.1.42]
154	COE1_sp002358575	COE1_sp002358575	K01652	16872	NODE_2_length_254332_cov_28_949484	M00019,M00570	acetolactate synthase I/II/III large subunit [EC:2.2.1.6]
155	COE1_sp002358575	COE1_sp002358575	K01652	6897	NODE_23_length_87707_cov_31_767250	M00019,M00570	acetolactate synthase I/II/III large subunit [EC:2.2.1.6]
156	COE1_sp002358575	COE1_sp002358575	K01652	18892	NODE_6_length_217817_cov_47_846323	M00019,M00570	acetolactate synthase I/II/III large subunit [EC:2.2.1.6]
157	COE1_sp002358575	COE1_sp002358575	K01652	17780	NODE_4_length_244402_cov_28_435774	M00019,M00570	acetolactate synthase I/II/III large subunit [EC:2.2.1.6]
158	COE1_sp002358575	COE1_sp002358575	K01687	17781	NODE_4_length_244402_cov_28_435774	M00019,M00570	dihydroxy-acid dehydratase [EC:4.2.1.9]
159	COE1_sp002358575	COE1_sp002358575	K01687	1126	NODE_10_length_168523_cov_33_488116	M00019,M00570	dihydroxy-acid dehydratase [EC:4.2.1.9]
160	COE1_sp002358575	COE1_sp002358575	K01653	16873	NODE_2_length_254332_cov_28_949484	M00019,M00570	acetolactate synthase I/III small subunit [EC:2.2.1.6]
161	COE1_sp002358575	COE1_sp002358575	K01653	16874	NODE_2_length_254332_cov_28_949484	M00019,M00570	acetolactate synthase I/III small subunit [EC:2.2.1.6]
162	COE1_sp002358575	COE1_sp002358575	K01704	17929	NODE_4_length_244402_cov_28_435774	M00535,M00432	3-isopropylmalate/(R)-2-methylmalate dehydratase small subunit [EC:4.2.1.33 4.2.1.35]
163	COE1_sp002358575	COE1_sp002358575	K01704	17927	NODE_4_length_244402_cov_28_435774	M00535,M00432	3-isopropylmalate/(R)-2-methylmalate dehydratase small subunit [EC:4.2.1.33 4.2.1.35]
164	COE1_sp002358575	COE1_sp002358575	K01703	17928	NODE_4_length_244402_cov_28_435774	M00535,M00432	3-isopropylmalate/(R)-2-methylmalate dehydratase large subunit [EC:4.2.1.33 4.2.1.35]
165	COE1_sp002358575	COE1_sp002358575	K01703	17926	NODE_4_length_244402_cov_28_435774	M00535,M00432	3-isopropylmalate/(R)-2-methylmalate dehydratase large subunit [EC:4.2.1.33 4.2.1.35]
166	COE1_sp002358575	COE1_sp002358575	K00052	17782	NODE_4_length_244402_cov_28_435774	M00535,M00432	3-isopropylmalate dehydrogenase [EC:1.1.1.85]
167	COE1_sp002358575	COE1_sp002358575	K01754	16855	NODE_2_length_254332_cov_28_949484	M00570	threonine dehydratase [EC:4.3.1.19]
168	COE1_sp002358575	COE1_sp002358575	K01649	17308	NODE_3_length_245677_cov_33_343463	M00432	2-isopropylmalate synthase [EC:2.3.3.13]
169	COE1_sp002358575	COE1_sp002358575	K01778	3985	NODE_17_length_124411_cov_36_225466	M00016,M00525,M00527	diaminopimelate epimerase [EC:5.1.1.7]
170	COE1_sp002358575	COE1_sp002358575	K00215	20202	NODE_74_length_16881_cov_27_219066	M00016,M00525,M00526,M00527	4-hydroxy-tetrahydrodipicolinate reductase [EC:1.17.1.8]
171	COE1_sp002358575	COE1_sp002358575	K00821	6883	NODE_23_length_87707_cov_31_767250	M00016,M00028,M00845	acetylornithine/N-succinyldiaminopimelate aminotransferase [EC:2.6.1.11 2.6.1.17]
172	COE1_sp002358575	COE1_sp002358575	K01586	17330	NODE_3_length_245677_cov_33_343463	M00016,M00525,M00526,M00527	diaminopimelate decarboxylase [EC:4.1.1.20]
173	COE1_sp002358575	COE1_sp002358575	K01714	20203	NODE_74_length_16881_cov_27_219066	M00016,M00525,M00526,M00527	4-hydroxy-tetrahydrodipicolinate synthase [EC:4.3.3.7]
174	COE1_sp002358575	COE1_sp002358575	K03340	20065	NODE_8_length_170500_cov_36_861334	M00526	diaminopimelate dehydrogenase [EC:1.4.1.16]
175	COE1_sp002358575	COE1_sp002358575	K10206	11985	NODE_36_length_52946_cov_27_366357	M00527	LL-diaminopimelate aminotransferase [EC:2.6.1.83]
176	COE1_sp002358575	COE1_sp002358575	K00145	19480	NODE_7_length_184084_cov_31_685512	M00028,M00845	N-acetyl-gamma-glutamyl-phosphate reductase [EC:1.2.1.38]
177	COE1_sp002358575	COE1_sp002358575	K00620	6881	NODE_23_length_87707_cov_31_767250	M00028	glutamate N-acetyltransferase / amino-acid N-acetyltransferase [EC:2.3.1.35 2.3.1.1]
178	COE1_sp002358575	COE1_sp002358575	K22477	6880	NODE_23_length_87707_cov_31_767250	M00028	N-acetylglutamate synthase [EC:2.3.1.1]
179	COE1_sp002358575	COE1_sp002358575	K00930	6882	NODE_23_length_87707_cov_31_767250	M00028	acetylglutamate kinase [EC:2.7.2.8]
180	COE1_sp002358575	COE1_sp002358575	K01940	6875	NODE_23_length_87707_cov_31_767250	M00844,M00845,M00029	argininosuccinate synthase [EC:6.3.4.5]
181	COE1_sp002358575	COE1_sp002358575	K00611	18446	NODE_5_length_232515_cov_36_962832	M00844,M00029	ornithine carbamoyltransferase [EC:2.1.3.3]
182	COE1_sp002358575	COE1_sp002358575	K01755	16975	NODE_2_length_254332_cov_28_949484	M00844,M00845,M00029	argininosuccinate lyase [EC:4.3.2.1]
183	COE1_sp002358575	COE1_sp002358575	K00147	3048	NODE_14_length_153927_cov_29_889811	M00015	glutamate-5-semialdehyde dehydrogenase [EC:1.2.1.41]
184	COE1_sp002358575	COE1_sp002358575	K00931	3043	NODE_14_length_153927_cov_29_889811	M00015	glutamate 5-kinase [EC:2.7.2.11]
185	COE1_sp002358575	COE1_sp002358575	K00286	18444	NODE_5_length_232515_cov_36_962832	M00015	pyrroline-5-carboxylate reductase [EC:1.5.1.2]
186	COE1_sp002358575	COE1_sp002358575	K01585	3922	NODE_17_length_124411_cov_36_225466	M00133	arginine decarboxylase [EC:4.1.1.19]
187	COE1_sp002358575	COE1_sp002358575	K00013	16910	NODE_2_length_254332_cov_28_949484	M00026	histidinol dehydrogenase [EC:1.1.1.23]
188	COE1_sp002358575	COE1_sp002358575	K01693	16911	NODE_2_length_254332_cov_28_949484	M00026	imidazoleglycerol-phosphate dehydratase [EC:4.2.1.19]
189	COE1_sp002358575	COE1_sp002358575	K00817	3993	NODE_17_length_124411_cov_36_225466	M00026	histidinol-phosphate aminotransferase [EC:2.6.1.9]
190	COE1_sp002358575	COE1_sp002358575	K02501	17316	NODE_3_length_245677_cov_33_343463	M00026	imidazole glycerol-phosphate synthase subunit HisH [EC:4.3.2.10]
191	COE1_sp002358575	COE1_sp002358575	K02500	17317	NODE_3_length_245677_cov_33_343463	M00026	imidazole glycerol-phosphate synthase subunit HisF [EC:4.3.2.10]
192	COE1_sp002358575	COE1_sp002358575	K04486	13995	NODE_42_length_44558_cov_29_045278	M00026	histidinol-phosphatase (PHP family) [EC:3.1.3.15]
193	COE1_sp002358575	COE1_sp002358575	K01814	20201	NODE_74_length_16881_cov_27_219066	M00026	phosphoribosylformimino-5-aminoimidazole carboxamide ribotide isomerase [EC:5.3.1.16]
194	COE1_sp002358575	COE1_sp002358575	K02502	16908	NODE_2_length_254332_cov_28_949484	M00026	ATP phosphoribosyltransferase regulatory subunit
195	COE1_sp002358575	COE1_sp002358575	K00765	16909	NODE_2_length_254332_cov_28_949484	M00026	ATP phosphoribosyltransferase [EC:2.4.2.17]
196	COE1_sp002358575	COE1_sp002358575	K00014	3556	NODE_15_length_152018_cov_30_070583	M00022	shikimate dehydrogenase [EC:1.1.1.25]
197	COE1_sp002358575	COE1_sp002358575	K00800	4000	NODE_17_length_124411_cov_36_225466	M00022	3-phosphoshikimate 1-carboxyvinyltransferase [EC:2.5.1.19]
198	COE1_sp002358575	COE1_sp002358575	K03786	3559	NODE_15_length_152018_cov_30_070583	M00022	3-dehydroquinate dehydratase II [EC:4.2.1.10]
199	COE1_sp002358575	COE1_sp002358575	K00891	2601	NODE_13_length_156099_cov_29_167568	M00022	shikimate kinase [EC:2.7.1.71]
200	COE1_sp002358575	COE1_sp002358575	K00891	3557	NODE_15_length_152018_cov_30_070583	M00022	shikimate kinase [EC:2.7.1.71]
201	COE1_sp002358575	COE1_sp002358575	K01736	17786	NODE_4_length_244402_cov_28_435774	M00022	chorismate synthase [EC:4.2.3.5]
202	COE1_sp002358575	COE1_sp002358575	K01735	3011	NODE_14_length_153927_cov_29_889811	M00022	3-dehydroquinate synthase [EC:4.2.3.4]
203	COE1_sp002358575	COE1_sp002358575	K01626	13998	NODE_42_length_44558_cov_29_045278	M00022	3-deoxy-7-phosphoheptulonate synthase [EC:2.5.1.54]
204	COE1_sp002358575	COE1_sp002358575	K01817	17438	NODE_3_length_245677_cov_33_343463	M00023	phosphoribosylanthranilate isomerase [EC:5.3.1.24]
205	COE1_sp002358575	COE1_sp002358575	K01658	17435	NODE_3_length_245677_cov_33_343463	M00023	anthranilate synthase component II [EC:4.1.3.27]
206	COE1_sp002358575	COE1_sp002358575	K00766	17436	NODE_3_length_245677_cov_33_343463	M00023	anthranilate phosphoribosyltransferase [EC:2.4.2.18]
207	COE1_sp002358575	COE1_sp002358575	K01695	17440	NODE_3_length_245677_cov_33_343463	M00023	tryptophan synthase alpha chain [EC:4.2.1.20]
208	COE1_sp002358575	COE1_sp002358575	K01609	17437	NODE_3_length_245677_cov_33_343463	M00023	indole-3-glycerol phosphate synthase [EC:4.1.1.48]
209	COE1_sp002358575	COE1_sp002358575	K01696	17439	NODE_3_length_245677_cov_33_343463	M00023	tryptophan synthase beta chain [EC:4.2.1.20]
210	COE1_sp002358575	COE1_sp002358575	K06001	9344	NODE_30_length_61880_cov_33_616013	M00023	tryptophan synthase beta chain [EC:4.2.1.20]
211	COE1_sp002358575	COE1_sp002358575	K01657	17434	NODE_3_length_245677_cov_33_343463	M00023	anthranilate synthase component I [EC:4.1.3.27]
212	COE1_sp002358575	COE1_sp002358575	K04518	17884	NODE_4_length_244402_cov_28_435774	M00024	prephenate dehydratase [EC:4.2.1.51]
213	COE1_sp002358575	COE1_sp002358575	K06209	19469	NODE_7_length_184084_cov_31_685512	M00024,M00025	chorismate mutase [EC:5.4.99.5]
214	COE1_sp002358575	COE1_sp002358575	K14170	17884	NODE_4_length_244402_cov_28_435774	M00024,M00025,M00040	chorismate mutase / prephenate dehydratase [EC:5.4.99.5 4.2.1.51]
215	COE1_sp002358575	COE1_sp002358575	K04517	16992	NODE_2_length_254332_cov_28_949484	M00025	prephenate dehydrogenase [EC:1.3.1.12]
216	COE1_sp002358575	COE1_sp002358575	K00737	1641	NODE_11_length_165420_cov_36_304478	M00075	beta-1,4-mannosyl-glycoprotein beta-1,4-N-acetylglucosaminyltransferase [EC:2.4.1.144]
217	COE1_sp002358575	COE1_sp002358575	K12373	4704	NODE_20_length_104815_cov_34_771325	M00079	hexosaminidase [EC:3.2.1.52]
218	COE1_sp002358575	COE1_sp002358575	K02536	18423	NODE_5_length_232515_cov_36_962832	M00060,M00866	UDP-3-O-[3-hydroxymyristoyl] glucosamine N-acyltransferase [EC:2.3.1.191]
219	COE1_sp002358575	COE1_sp002358575	K03270	19561	NODE_7_length_184084_cov_31_685512	M00063	3-deoxy-D-manno-octulosonate 8-phosphate phosphatase (KDO 8-P phosphatase) [EC:3.1.3.45]
220	COE1_sp002358575	COE1_sp002358575	K03271	2548	NODE_13_length_156099_cov_29_167568	M00064	D-sedoheptulose 7-phosphate isomerase [EC:5.3.1.28]
221	COE1_sp002358575	COE1_sp002358575	K03273	2550	NODE_13_length_156099_cov_29_167568	M00064	D-glycero-D-manno-heptose 1,7-bisphosphate phosphatase [EC:3.1.3.82 3.1.3.83]
222	COE1_sp002358575	COE1_sp002358575	K03272	2546	NODE_13_length_156099_cov_29_167568	M00064	D-beta-D-heptose 7-phosphate kinase / D-beta-D-heptose 1-phosphate adenosyltransferase [EC:2.7.1.167 2.7.7.70]
223	COE1_sp002358575	COE1_sp002358575	K15894	1589	NODE_11_length_165420_cov_36_304478	M00923	UDP-N-acetylglucosamine 4,6-dehydratase/5-epimerase [EC:4.2.1.115 5.1.3.-]
224	COE1_sp002358575	COE1_sp002358575	K03151	19518	NODE_7_length_184084_cov_31_685512	M00127,M00895	tRNA uracil 4-sulfurtransferase [EC:2.8.1.4]
225	COE1_sp002358575	COE1_sp002358575	K00949	17913	NODE_4_length_244402_cov_28_435774	M00897,M00898	thiamine pyrophosphokinase [EC:2.7.6.2]
226	COE1_sp002358575	COE1_sp002358575	K21064	20082	NODE_8_length_170500_cov_36_861334	M00125	5-amino-6-(5-phospho-D-ribitylamino)uracil phosphatase [EC:3.1.3.104]
227	COE1_sp002358575	COE1_sp002358575	K21064	17877	NODE_4_length_244402_cov_28_435774	M00125	5-amino-6-(5-phospho-D-ribitylamino)uracil phosphatase [EC:3.1.3.104]
228	COE1_sp002358575	COE1_sp002358575	K21064	16239	NODE_1_length_310843_cov_41_188463	M00125	5-amino-6-(5-phospho-D-ribitylamino)uracil phosphatase [EC:3.1.3.104]
229	COE1_sp002358575	COE1_sp002358575	K11753	17292	NODE_3_length_245677_cov_33_343463	M00125	riboflavin kinase / FMN adenylyltransferase [EC:2.7.1.26 2.7.7.2]
230	COE1_sp002358575	COE1_sp002358575	K03517	20186	NODE_8_length_170500_cov_36_861334	M00115	quinolinate synthase [EC:2.5.1.72]
231	COE1_sp002358575	COE1_sp002358575	K00969	16922	NODE_2_length_254332_cov_28_949484	M00115,M00912	nicotinate-nucleotide adenylyltransferase [EC:2.7.7.18]
232	COE1_sp002358575	COE1_sp002358575	K00767	20188	NODE_8_length_170500_cov_36_861334	M00115,M00912	nicotinate-nucleotide pyrophosphorylase (carboxylating) [EC:2.4.2.19]
233	COE1_sp002358575	COE1_sp002358575	K01950	4376	NODE_19_length_114258_cov_32_274616	M00115,M00912	NAD+ synthase (glutamine-hydrolysing) [EC:6.3.5.1]
234	COE1_sp002358575	COE1_sp002358575	K03525	18449	NODE_5_length_232515_cov_36_962832	M00120	type III pantothenate kinase [EC:2.7.1.33]
235	COE1_sp002358575	COE1_sp002358575	K00954	16898	NODE_2_length_254332_cov_28_949484	M00120	pantetheine-phosphate adenylyltransferase [EC:2.7.7.3]
236	COE1_sp002358575	COE1_sp002358575	K00859	17417	NODE_3_length_245677_cov_33_343463	M00120	dephospho-CoA kinase [EC:2.7.1.24]
237	COE1_sp002358575	COE1_sp002358575	K01012	17300	NODE_3_length_245677_cov_33_343463	M00123,M00573,M00577	biotin synthase [EC:2.8.1.6]
238	COE1_sp002358575	COE1_sp002358575	K11754	3932	NODE_17_length_124411_cov_36_225466	M00126,M00841	dihydrofolate synthase / folylpolyglutamate synthase [EC:6.3.2.12 6.3.2.17]
239	COE1_sp002358575	COE1_sp002358575	K00287	3916	NODE_17_length_124411_cov_36_225466	M00126,M00840	dihydrofolate reductase [EC:1.5.1.3]
240	COE1_sp002358575	COE1_sp002358575	K22391	17898	NODE_4_length_244402_cov_28_435774	M00126	GTP cyclohydrolase I [EC:3.5.4.16]
241	COE1_sp002358575	COE1_sp002358575	K02302	3569	NODE_15_length_152018_cov_30_070583	M00846,M00924	uroporphyrin-III C-methyltransferase / precorrin-2 dehydrogenase / sirohydrochlorin ferrochelatase [EC:2.1.1.107 1.3.1.76 4.99.1.4]
242	COE1_sp002358575	COE1_sp002358575	K02304	3569	NODE_15_length_152018_cov_30_070583	M00846,M00924	precorrin-2 dehydrogenase / sirohydrochlorin ferrochelatase [EC:1.3.1.76 4.99.1.4]
243	COE1_sp002358575	COE1_sp002358575	K02303	3569	NODE_15_length_152018_cov_30_070583	M00846,M00924,M00925	uroporphyrin-III C-methyltransferase [EC:2.1.1.107]
244	COE1_sp002358575	COE1_sp002358575	K01885	17833	NODE_4_length_244402_cov_28_435774	M00121	glutamyl-tRNA synthetase [EC:6.1.1.17]
245	COE1_sp002358575	COE1_sp002358575	K02495	3059	NODE_14_length_153927_cov_29_889811	M00121	oxygen-independent coproporphyrinogen III oxidase [EC:1.3.98.3]
246	COE1_sp002358575	COE1_sp002358575	K02495	589	NODE_9_length_169421_cov_26_785175	M00121	oxygen-independent coproporphyrinogen III oxidase [EC:1.3.98.3]
247	COE1_sp002358575	COE1_sp002358575	K02495	16846	NODE_2_length_254332_cov_28_949484	M00121	oxygen-independent coproporphyrinogen III oxidase [EC:1.3.98.3]
248	COE1_sp002358575	COE1_sp002358575	K19221	20204	NODE_74_length_16881_cov_27_219066	M00122	cob(I)alamin adenosyltransferase [EC:2.5.1.17]
249	COE1_sp002358575	COE1_sp002358575	K01823	17907	NODE_4_length_244402_cov_28_435774	M00095,M00849,M00096,M00364,M00365,M00366,M00367	isopentenyl-diphosphate Delta-isomerase [EC:5.3.3.2]
250	COE1_sp002358575	COE1_sp002358575	K01662	451	NODE_9_length_169421_cov_26_785175	M00096	1-deoxy-D-xylulose-5-phosphate synthase [EC:2.2.1.7]
251	COE1_sp002358575	COE1_sp002358575	K00099	11993	NODE_36_length_52946_cov_27_366357	M00096	1-deoxy-D-xylulose-5-phosphate reductoisomerase [EC:1.1.1.267]
252	COE1_sp002358575	COE1_sp002358575	K00991	6174	NODE_22_length_91632_cov_44_239219	M00096	2-C-methyl-D-erythritol 4-phosphate cytidylyltransferase [EC:2.7.7.60]
253	COE1_sp002358575	COE1_sp002358575	K00919	4343	NODE_19_length_114258_cov_32_274616	M00096	4-diphosphocytidyl-2-C-methyl-D-erythritol kinase [EC:2.7.1.148]
254	COE1_sp002358575	COE1_sp002358575	K03526	11995	NODE_36_length_52946_cov_27_366357	M00096	(E)-4-hydroxy-3-methylbut-2-enyl-diphosphate synthase [EC:1.17.7.1 1.17.7.3]
255	COE1_sp002358575	COE1_sp002358575	K01770	10473	NODE_32_length_57058_cov_26_586952	M00096	2-C-methyl-D-erythritol 2,4-cyclodiphosphate synthase [EC:4.6.1.12]
256	COE1_sp002358575	COE1_sp002358575	K03527	420	NODE_9_length_169421_cov_26_785175	M00096	4-hydroxy-3-methylbut-2-en-1-yl diphosphate reductase [EC:1.17.7.4]
257	COE1_sp002358575	COE1_sp002358575	K01790	2572	NODE_13_length_156099_cov_29_167568	M00793	dTDP-4-dehydrorhamnose 3,5-epimerase [EC:5.1.3.13]
258	COE1_sp002358575	COE1_sp002358575	K01710	2569	NODE_13_length_156099_cov_29_167568	M00793	dTDP-glucose 4,6-dehydratase [EC:4.2.1.46]
259	COE1_sp002358575	COE1_sp002358575	K00973	2570	NODE_13_length_156099_cov_29_167568	M00793	glucose-1-phosphate thymidylyltransferase [EC:2.7.7.24]
260	COE1_sp002358575	COE1_sp002358575	K00067	1571	NODE_11_length_165420_cov_36_304478	M00793	dTDP-4-dehydrorhamnose reductase [EC:1.1.1.133]
261	COE1_sp002358575	COE1_sp002358575	K00588	19526	NODE_7_length_184084_cov_31_685512	M00039	caffeoyl-CoA O-methyltransferase [EC:2.1.1.104]
262	COE1_sp002358575	COE1_sp002358575	K02078	8801	NODE_29_length_66002_cov_45_489469	M00848	acyl carrier protein
263	COE1_sp002358575	COE1_sp002358575	K02078	4323	NODE_19_length_114258_cov_32_274616	M00848	acyl carrier protein
264	COE1_sp002358575	COE1_sp002358575	K02078	1125	NODE_10_length_168523_cov_33_488116	M00848	acyl carrier protein
265	COE1_sp002358575	COE1_sp002358575	K02078	3910	NODE_17_length_124411_cov_36_225466	M00848	acyl carrier protein
266	COE1_sp002358575	COE1_sp002358575	K02078	1127	NODE_10_length_168523_cov_33_488116	M00848	acyl carrier protein
267	COE1_sp002358575	COE1_sp002358575	K02078	16851	NODE_2_length_254332_cov_28_949484	M00848	acyl carrier protein
268	COE1_sp002358575	COE1_sp002358575	K02078	19610	NODE_7_length_184084_cov_31_685512	M00848	acyl carrier protein
269	COE1_sp002358575	COE1_sp002358575	K01666	5341	NODE_21_length_104165_cov_45_301162	M00569,M00545	4-hydroxy 2-oxovalerate aldolase [EC:4.1.3.39]
270	COE1_sp002358575	COE1_sp002358575	K01666	19558	NODE_7_length_184084_cov_31_685512	M00569,M00545	4-hydroxy 2-oxovalerate aldolase [EC:4.1.3.39]
271	COE1_sp002358575	COE1_sp002358575	K01912	3097	NODE_14_length_153927_cov_29_889811	M00878	phenylacetate-CoA ligase [EC:6.2.1.30]
272	COE1_sp002358575	COE1_sp002358575	K01912	17916	NODE_4_length_244402_cov_28_435774	M00878	phenylacetate-CoA ligase [EC:6.2.1.30]
273	COE1_sp002358575	COE1_sp002358575	K02171	8257	NODE_28_length_66823_cov_33_512940	M00627	BlaI family transcriptional regulator, penicillinase repressor
274	COE1_sp002358575	COE1_sp002358575	K02171	16866	NODE_2_length_254332_cov_28_949484	M00627	BlaI family transcriptional regulator, penicillinase repressor
275	COE1_sp002358575	COE1_sp002358575	K02171	6947	NODE_23_length_87707_cov_31_767250	M00627	BlaI family transcriptional regulator, penicillinase repressor
276	COE1_sp002358575	COE1_sp002358575	K02171	15850	NODE_52_length_25856_cov_36_804891	M00627	BlaI family transcriptional regulator, penicillinase repressor
277	COE1_sp002358575	COE1_sp002358575	K02171	17327	NODE_3_length_245677_cov_33_343463	M00627	BlaI family transcriptional regulator, penicillinase repressor
278	COE1_sp002358575	COE1_sp002358575	K02171	4337	NODE_19_length_114258_cov_32_274616	M00627	BlaI family transcriptional regulator, penicillinase repressor
279	COE1_sp002358575	COE1_sp002358575	K02171	18325	NODE_5_length_232515_cov_36_962832	M00627	BlaI family transcriptional regulator, penicillinase repressor
280	COE1_sp002358575	COE1_sp002358575	K02171	7575	NODE_24_length_84148_cov_32_163034	M00627	BlaI family transcriptional regulator, penicillinase repressor
281	COE1_sp002358575	COE1_sp002358575	K02171	18491	NODE_69_length_17837_cov_34_971263	M00627	BlaI family transcriptional regulator, penicillinase repressor
282	COE1_sp002358575	COE1_sp002358575	K02171	19036	NODE_6_length_217817_cov_47_846323	M00627	BlaI family transcriptional regulator, penicillinase repressor
283	COE1_sp002358575	COE1_sp002358575	K02172	8256	NODE_28_length_66823_cov_33_512940	M00627	bla regulator protein blaR1
284	COE1_sp002358575	COE1_sp002358575	K02172	6946	NODE_23_length_87707_cov_31_767250	M00627	bla regulator protein blaR1
285	COE1_sp002358575	COE1_sp002358575	K02172	16867	NODE_2_length_254332_cov_28_949484	M00627	bla regulator protein blaR1
286	COE1_sp002358575	COE1_sp002358575	K02172	15849	NODE_52_length_25856_cov_36_804891	M00627	bla regulator protein blaR1
287	COE1_sp002358575	COE1_sp002358575	K02172	17453	NODE_3_length_245677_cov_33_343463	M00627	bla regulator protein blaR1
288	COE1_sp002358575	COE1_sp002358575	K02172	17328	NODE_3_length_245677_cov_33_343463	M00627	bla regulator protein blaR1
289	COE1_sp002358575	COE1_sp002358575	K02172	4338	NODE_19_length_114258_cov_32_274616	M00627	bla regulator protein blaR1
290	COE1_sp002358575	COE1_sp002358575	K02172	7574	NODE_24_length_84148_cov_32_163034	M00627	bla regulator protein blaR1
291	COE1_sp002358575	COE1_sp002358575	K02172	18326	NODE_5_length_232515_cov_36_962832	M00627	bla regulator protein blaR1
292	COE1_sp002358575	COE1_sp002358575	K02172	19035	NODE_6_length_217817_cov_47_846323	M00627	bla regulator protein blaR1
293	COE1_sp002358575	COE1_sp002358575	K02172	18492	NODE_69_length_17837_cov_34_971263	M00627	bla regulator protein blaR1
294	COE1_sp002358575	COE1_sp002358575	K18345	17311	NODE_3_length_245677_cov_33_343463	M00651	two-component system, OmpR family, sensor histidine kinase VanS [EC:2.7.13.3]
295	COE1_sp002358575	COE1_sp002358575	K18346	16491	NODE_53_length_25696_cov_32_287274	M00651	vancomycin resistance protein VanW
296	COE1_sp002358575	COE1_sp002358575	K18350	4736	NODE_20_length_104815_cov_34_771325	M00652	two-component system, OmpR family, sensor histidine kinase VanS [EC:2.7.13.3]
297	COE1_sp002358575	COE1_sp002358575	K18349	4737	NODE_20_length_104815_cov_34_771325	M00652	two-component system, OmpR family, response regulator VanR
298	COE1_sp002358575	COE1_sp002358575	K18349	8835	NODE_29_length_66002_cov_45_489469	M00652	two-component system, OmpR family, response regulator VanR
299	COE1_sp002358575	COE1_sp002358575	K18349	16798	NODE_2_length_254332_cov_28_949484	M00652	two-component system, OmpR family, response regulator VanR
300	COE1_sp002358575	COE1_sp002358575	K18348	4734	NODE_20_length_104815_cov_34_771325	M00652	serine/alanine racemase [EC:5.1.1.18 5.1.1.1]
301	COE1_sp002358575	COE1_sp002358575	K18856	4735	NODE_20_length_104815_cov_34_771325	M00652	D-alanine---D-serine ligase [EC:6.3.2.35]
302	COE1_sp002358575	COE1_sp002358575	K03367	19550	NODE_7_length_184084_cov_31_685512	M00725	D-alanine--poly(phosphoribitol) ligase subunit 1 [EC:6.1.1.13]
303	COE1_sp002358575	COE1_sp002358575	K14188	19553	NODE_7_length_184084_cov_31_685512	M00725	D-alanine--poly(phosphoribitol) ligase subunit 2 [EC:6.1.1.13]
304	COE1_sp002358575	COE1_sp002358575	K18909	17335	NODE_3_length_245677_cov_33_343463	M00705	MarR family transcriptional regulator, repressor for mepA
305	COE1_sp002358575	COE1_sp002358575	K18908	6128	NODE_22_length_91632_cov_44_239219	M00705	multidrug efflux pump
306	COE1_sp002358575	COE1_sp002358575	K18908	19466	NODE_7_length_184084_cov_31_685512	M00705	multidrug efflux pump
307	COE1_sp002358575	COE1_sp002358575	K18908	17812	NODE_4_length_244402_cov_28_435774	M00705	multidrug efflux pump
308	COE1_sp002358575	COE1_sp002358575	K07504	12411	NODE_38_length_47455_cov_29_409747	None	predicted type IV restriction endonuclease
309	COE1_sp002358575	COE1_sp002358575	K02051	16434	NODE_1_length_310843_cov_41_188463	None	NitT/TauT family transport system substrate-binding protein
310	COE1_sp002358575	COE1_sp002358575	K02051	12405	NODE_38_length_47455_cov_29_409747	None	NitT/TauT family transport system substrate-binding protein
311	COE1_sp002358575	COE1_sp002358575	K03215	12409	NODE_38_length_47455_cov_29_409747	None	23S rRNA (uracil1939-C5)-methyltransferase [EC:2.1.1.190]
312	COE1_sp002358575	COE1_sp002358575	K03215	18276	NODE_5_length_232515_cov_36_962832	None	23S rRNA (uracil1939-C5)-methyltransferase [EC:2.1.1.190]
313	COE1_sp002358575	COE1_sp002358575	K07474	12443	NODE_38_length_47455_cov_29_409747	None	phage terminase small subunit
314	COE1_sp002358575	COE1_sp002358575	K03657	17832	NODE_4_length_244402_cov_28_435774	None	DNA helicase II / ATP-dependent DNA helicase PcrA [EC:3.6.4.12]
315	COE1_sp002358575	COE1_sp002358575	K03657	1021	NODE_10_length_168523_cov_33_488116	None	DNA helicase II / ATP-dependent DNA helicase PcrA [EC:3.6.4.12]
316	COE1_sp002358575	COE1_sp002358575	K03657	12406	NODE_38_length_47455_cov_29_409747	None	DNA helicase II / ATP-dependent DNA helicase PcrA [EC:3.6.4.12]
317	COE1_sp002358575	COE1_sp002358575	K03496	9898	NODE_31_length_58868_cov_53_529152	None	chromosome partitioning protein
318	COE1_sp002358575	COE1_sp002358575	K03496	492	NODE_9_length_169421_cov_26_785175	None	chromosome partitioning protein
319	COE1_sp002358575	COE1_sp002358575	K03496	2636	NODE_13_length_156099_cov_29_167568	None	chromosome partitioning protein
320	COE1_sp002358575	COE1_sp002358575	K03496	592	NODE_9_length_169421_cov_26_785175	None	chromosome partitioning protein
321	COE1_sp002358575	COE1_sp002358575	K03496	12435	NODE_38_length_47455_cov_29_409747	None	chromosome partitioning protein
322	COE1_sp002358575	COE1_sp002358575	K03496	5395	NODE_21_length_104165_cov_45_301162	None	chromosome partitioning protein
323	COE1_sp002358575	COE1_sp002358575	K03496	18455	NODE_5_length_232515_cov_36_962832	None	chromosome partitioning protein
324	COE1_sp002358575	COE1_sp002358575	K03496	1176	NODE_10_length_168523_cov_33_488116	None	chromosome partitioning protein
325	COE1_sp002358575	COE1_sp002358575	K03497	8216	NODE_28_length_66823_cov_33_512940	None	ParB family transcriptional regulator, chromosome partitioning protein
326	COE1_sp002358575	COE1_sp002358575	K03497	16423	NODE_1_length_310843_cov_41_188463	None	ParB family transcriptional regulator, chromosome partitioning protein
327	COE1_sp002358575	COE1_sp002358575	K03497	9897	NODE_31_length_58868_cov_53_529152	None	ParB family transcriptional regulator, chromosome partitioning protein
328	COE1_sp002358575	COE1_sp002358575	K03497	2637	NODE_13_length_156099_cov_29_167568	None	ParB family transcriptional regulator, chromosome partitioning protein
329	COE1_sp002358575	COE1_sp002358575	K03497	593	NODE_9_length_169421_cov_26_785175	None	ParB family transcriptional regulator, chromosome partitioning protein
330	COE1_sp002358575	COE1_sp002358575	K03497	497	NODE_9_length_169421_cov_26_785175	None	ParB family transcriptional regulator, chromosome partitioning protein
331	COE1_sp002358575	COE1_sp002358575	K03497	12436	NODE_38_length_47455_cov_29_409747	None	ParB family transcriptional regulator, chromosome partitioning protein
332	COE1_sp002358575	COE1_sp002358575	K03497	5396	NODE_21_length_104165_cov_45_301162	None	ParB family transcriptional regulator, chromosome partitioning protein
333	COE1_sp002358575	COE1_sp002358575	K03497	8215	NODE_28_length_66823_cov_33_512940	None	ParB family transcriptional regulator, chromosome partitioning protein
334	COE1_sp002358575	COE1_sp002358575	K03497	18456	NODE_5_length_232515_cov_36_962832	None	ParB family transcriptional regulator, chromosome partitioning protein
335	COE1_sp002358575	COE1_sp002358575	K03497	8217	NODE_28_length_66823_cov_33_512940	None	ParB family transcriptional regulator, chromosome partitioning protein
336	COE1_sp002358575	COE1_sp002358575	K06909	12444	NODE_38_length_47455_cov_29_409747	None	phage terminase large subunit
337	COE1_sp002358575	COE1_sp002358575	K14059	18496	NODE_69_length_17837_cov_34_971263	None	integrase
338	COE1_sp002358575	COE1_sp002358575	K14059	17410	NODE_3_length_245677_cov_33_343463	None	integrase
339	COE1_sp002358575	COE1_sp002358575	K14059	6179	NODE_549_length_4428_cov_41_803339	None	integrase
340	COE1_sp002358575	COE1_sp002358575	K14059	4742	NODE_266_length_7088_cov_37_810038	None	integrase
341	COE1_sp002358575	COE1_sp002358575	K14059	9321	NODE_30_length_61880_cov_33_616013	None	integrase
342	COE1_sp002358575	COE1_sp002358575	K14059	1547	NODE_11_length_165420_cov_36_304478	None	integrase
343	COE1_sp002358575	COE1_sp002358575	K14059	13646	NODE_41_length_45064_cov_34_349663	None	integrase
344	COE1_sp002358575	COE1_sp002358575	K14059	20111	NODE_8_length_170500_cov_36_861334	None	integrase
345	COE1_sp002358575	COE1_sp002358575	K14059	17395	NODE_3_length_245677_cov_33_343463	None	integrase
346	COE1_sp002358575	COE1_sp002358575	K14059	12410	NODE_38_length_47455_cov_29_409747	None	integrase
347	COE1_sp002358575	COE1_sp002358575	K14059	2110	NODE_12_length_162894_cov_27_263954	None	integrase
348	COE1_sp002358575	COE1_sp002358575	K18830	12424	NODE_38_length_47455_cov_29_409747	None	HTH-type transcriptional regulator / antitoxin PezA
349	COE1_sp002358575	COE1_sp002358575	K18830	5441	NODE_344_length_6138_cov_32_971231	None	HTH-type transcriptional regulator / antitoxin PezA
350	COE1_sp002358575	COE1_sp002358575	K18830	2613	NODE_13_length_156099_cov_29_167568	None	HTH-type transcriptional regulator / antitoxin PezA
351	COE1_sp002358575	COE1_sp002358575	K18830	16806	NODE_2_length_254332_cov_28_949484	None	HTH-type transcriptional regulator / antitoxin PezA
352	COE1_sp002358575	COE1_sp002358575	K03602	449	NODE_9_length_169421_cov_26_785175	None	exodeoxyribonuclease VII small subunit [EC:3.1.11.6]
353	COE1_sp002358575	COE1_sp002358575	K03616	429	NODE_9_length_169421_cov_26_785175	None	Na+-translocating ferredoxin:NAD+ oxidoreductase subunit B [EC:7.2.1.2]
354	COE1_sp002358575	COE1_sp002358575	K06394	440	NODE_9_length_169421_cov_26_785175	None	stage III sporulation protein AE
355	COE1_sp002358575	COE1_sp002358575	K03617	428	NODE_9_length_169421_cov_26_785175	None	Na+-translocating ferredoxin:NAD+ oxidoreductase subunit A
356	COE1_sp002358575	COE1_sp002358575	K07317	623	NODE_81_length_15387_cov_36_545526	None	adenine-specific DNA-methyltransferase [EC:2.1.1.72]
357	COE1_sp002358575	COE1_sp002358575	K03615	424	NODE_9_length_169421_cov_26_785175	None	Na+-translocating ferredoxin:NAD+ oxidoreductase subunit C [EC:7.2.1.2]
358	COE1_sp002358575	COE1_sp002358575	K03601	448	NODE_9_length_169421_cov_26_785175	None	exodeoxyribonuclease VII large subunit [EC:3.1.11.6]
359	COE1_sp002358575	COE1_sp002358575	K06396	442	NODE_9_length_169421_cov_26_785175	None	stage III sporulation protein AG
360	COE1_sp002358575	COE1_sp002358575	K13017	548	NODE_9_length_169421_cov_26_785175	None	UDP-2-acetamido-2-deoxy-ribo-hexuluronate aminotransferase [EC:2.6.1.98]
361	COE1_sp002358575	COE1_sp002358575	K00057	574	NODE_9_length_169421_cov_26_785175	None	glycerol-3-phosphate dehydrogenase (NAD(P)+) [EC:1.1.1.94]
362	COE1_sp002358575	COE1_sp002358575	K06397	443	NODE_9_length_169421_cov_26_785175	None	stage III sporulation protein AH
363	COE1_sp002358575	COE1_sp002358575	K03402	454	NODE_9_length_169421_cov_26_785175	None	transcriptional regulator of arginine metabolism
364	COE1_sp002358575	COE1_sp002358575	K03614	425	NODE_9_length_169421_cov_26_785175	None	Na+-translocating ferredoxin:NAD+ oxidoreductase subunit D [EC:7.2.1.2]
365	COE1_sp002358575	COE1_sp002358575	K06393	439	NODE_9_length_169421_cov_26_785175	None	stage III sporulation protein AD
366	COE1_sp002358575	COE1_sp002358575	K21512	2644	NODE_13_length_156099_cov_29_167568	None	terminase, large subunit [EC:3.1.21.4]
367	COE1_sp002358575	COE1_sp002358575	K21512	5405	NODE_21_length_104165_cov_45_301162	None	terminase, large subunit [EC:3.1.21.4]
368	COE1_sp002358575	COE1_sp002358575	K21512	502	NODE_9_length_169421_cov_26_785175	None	terminase, large subunit [EC:3.1.21.4]
369	COE1_sp002358575	COE1_sp002358575	K07502	423	NODE_9_length_169421_cov_26_785175	None	uncharacterized protein
370	COE1_sp002358575	COE1_sp002358575	K06147	18372	NODE_5_length_232515_cov_36_962832	None	ATP-binding cassette, subfamily B, bacterial
371	COE1_sp002358575	COE1_sp002358575	K06147	6916	NODE_23_length_87707_cov_31_767250	None	ATP-binding cassette, subfamily B, bacterial
372	COE1_sp002358575	COE1_sp002358575	K06147	6917	NODE_23_length_87707_cov_31_767250	None	ATP-binding cassette, subfamily B, bacterial
373	COE1_sp002358575	COE1_sp002358575	K06147	583	NODE_9_length_169421_cov_26_785175	None	ATP-binding cassette, subfamily B, bacterial
374	COE1_sp002358575	COE1_sp002358575	K06147	582	NODE_9_length_169421_cov_26_785175	None	ATP-binding cassette, subfamily B, bacterial
375	COE1_sp002358575	COE1_sp002358575	K06147	3572	NODE_15_length_152018_cov_30_070583	None	ATP-binding cassette, subfamily B, bacterial
376	COE1_sp002358575	COE1_sp002358575	K06147	15863	NODE_52_length_25856_cov_36_804891	None	ATP-binding cassette, subfamily B, bacterial
377	COE1_sp002358575	COE1_sp002358575	K06147	17336	NODE_3_length_245677_cov_33_343463	None	ATP-binding cassette, subfamily B, bacterial
378	COE1_sp002358575	COE1_sp002358575	K06147	17337	NODE_3_length_245677_cov_33_343463	None	ATP-binding cassette, subfamily B, bacterial
379	COE1_sp002358575	COE1_sp002358575	K06147	19002	NODE_6_length_217817_cov_47_846323	None	ATP-binding cassette, subfamily B, bacterial
380	COE1_sp002358575	COE1_sp002358575	K01358	5408	NODE_21_length_104165_cov_45_301162	None	ATP-dependent Clp protease, protease subunit [EC:3.4.21.92]
381	COE1_sp002358575	COE1_sp002358575	K01358	20162	NODE_8_length_170500_cov_36_861334	None	ATP-dependent Clp protease, protease subunit [EC:3.4.21.92]
382	COE1_sp002358575	COE1_sp002358575	K01358	16995	NODE_2_length_254332_cov_28_949484	None	ATP-dependent Clp protease, protease subunit [EC:3.4.21.92]
383	COE1_sp002358575	COE1_sp002358575	K01358	2647	NODE_13_length_156099_cov_29_167568	None	ATP-dependent Clp protease, protease subunit [EC:3.4.21.92]
384	COE1_sp002358575	COE1_sp002358575	K01358	505	NODE_9_length_169421_cov_26_785175	None	ATP-dependent Clp protease, protease subunit [EC:3.4.21.92]
385	COE1_sp002358575	COE1_sp002358575	K01358	3963	NODE_17_length_124411_cov_36_225466	None	ATP-dependent Clp protease, protease subunit [EC:3.4.21.92]
386	COE1_sp002358575	COE1_sp002358575	K06392	438	NODE_9_length_169421_cov_26_785175	None	stage III sporulation protein AC
387	COE1_sp002358575	COE1_sp002358575	K08591	573	NODE_9_length_169421_cov_26_785175	None	acyl phosphate:glycerol-3-phosphate acyltransferase [EC:2.3.1.275]
388	COE1_sp002358575	COE1_sp002358575	K01953	1629	NODE_11_length_165420_cov_36_304478	None	asparagine synthase (glutamine-hydrolysing) [EC:6.3.5.4]
389	COE1_sp002358575	COE1_sp002358575	K01953	555	NODE_9_length_169421_cov_26_785175	None	asparagine synthase (glutamine-hydrolysing) [EC:6.3.5.4]
390	COE1_sp002358575	COE1_sp002358575	K01953	1617	NODE_11_length_165420_cov_36_304478	None	asparagine synthase (glutamine-hydrolysing) [EC:6.3.5.4]
391	COE1_sp002358575	COE1_sp002358575	K01953	20090	NODE_8_length_170500_cov_36_861334	None	asparagine synthase (glutamine-hydrolysing) [EC:6.3.5.4]
392	COE1_sp002358575	COE1_sp002358575	K01953	6909	NODE_23_length_87707_cov_31_767250	None	asparagine synthase (glutamine-hydrolysing) [EC:6.3.5.4]
393	COE1_sp002358575	COE1_sp002358575	K03613	427	NODE_9_length_169421_cov_26_785175	None	Na+-translocating ferredoxin:NAD+ oxidoreductase subunit E
394	COE1_sp002358575	COE1_sp002358575	K06390	436	NODE_9_length_169421_cov_26_785175	None	stage III sporulation protein AA
395	COE1_sp002358575	COE1_sp002358575	K06391	437	NODE_9_length_169421_cov_26_785175	None	stage III sporulation protein AB
396	COE1_sp002358575	COE1_sp002358575	K00858	453	NODE_9_length_169421_cov_26_785175	None	NAD+ kinase [EC:2.7.1.23]
397	COE1_sp002358575	COE1_sp002358575	K03612	426	NODE_9_length_169421_cov_26_785175	None	Na+-translocating ferredoxin:NAD+ oxidoreductase subunit G
398	COE1_sp002358575	COE1_sp002358575	K03700	480	NODE_9_length_169421_cov_26_785175	None	recombination protein U
399	COE1_sp002358575	COE1_sp002358575	K03700	16907	NODE_2_length_254332_cov_28_949484	None	recombination protein U
400	COE1_sp002358575	COE1_sp002358575	K21600	3060	NODE_14_length_153927_cov_29_889811	None	CsoR family transcriptional regulator, copper-sensing transcriptional repressor
401	COE1_sp002358575	COE1_sp002358575	K21600	461	NODE_9_length_169421_cov_26_785175	None	CsoR family transcriptional regulator, copper-sensing transcriptional repressor
402	COE1_sp002358575	COE1_sp002358575	K00633	435	NODE_9_length_169421_cov_26_785175	None	galactoside O-acetyltransferase [EC:2.3.1.18]
403	COE1_sp002358575	COE1_sp002358575	K01139	586	NODE_9_length_169421_cov_26_785175	None	GTP diphosphokinase / guanosine-3',5'-bis(diphosphate) 3'-diphosphatase [EC:2.7.6.5 3.1.7.2]
404	COE1_sp002358575	COE1_sp002358575	K06905	5419	NODE_21_length_104165_cov_45_301162	None	uncharacterized protein
405	COE1_sp002358575	COE1_sp002358575	K06905	2661	NODE_13_length_156099_cov_29_167568	None	uncharacterized protein
406	COE1_sp002358575	COE1_sp002358575	K06905	517	NODE_9_length_169421_cov_26_785175	None	uncharacterized protein
407	COE1_sp002358575	COE1_sp002358575	K06442	452	NODE_9_length_169421_cov_26_785175	None	23S rRNA (cytidine1920-2'-O)/16S rRNA (cytidine1409-2'-O)-methyltransferase [EC:2.1.1.226 2.1.1.227]
408	COE1_sp002358575	COE1_sp002358575	K01489	580	NODE_9_length_169421_cov_26_785175	None	cytidine deaminase [EC:3.5.4.5]
409	COE1_sp002358575	COE1_sp002358575	K01533	462	NODE_9_length_169421_cov_26_785175	None	P-type Cu2+ transporter [EC:7.2.2.9]
410	COE1_sp002358575	COE1_sp002358575	K00759	585	NODE_9_length_169421_cov_26_785175	None	adenine phosphoribosyltransferase [EC:2.4.2.7]
411	COE1_sp002358575	COE1_sp002358575	K01447	16331	NODE_1_length_310843_cov_41_188463	None	N-acetylmuramoyl-L-alanine amidase [EC:3.5.1.28]
412	COE1_sp002358575	COE1_sp002358575	K01447	16814	NODE_2_length_254332_cov_28_949484	None	N-acetylmuramoyl-L-alanine amidase [EC:3.5.1.28]
413	COE1_sp002358575	COE1_sp002358575	K01447	533	NODE_9_length_169421_cov_26_785175	None	N-acetylmuramoyl-L-alanine amidase [EC:3.5.1.28]
414	COE1_sp002358575	COE1_sp002358575	K01447	17301	NODE_3_length_245677_cov_33_343463	None	N-acetylmuramoyl-L-alanine amidase [EC:3.5.1.28]
415	COE1_sp002358575	COE1_sp002358575	K01447	5433	NODE_21_length_104165_cov_45_301162	None	N-acetylmuramoyl-L-alanine amidase [EC:3.5.1.28]
416	COE1_sp002358575	COE1_sp002358575	K06908	513	NODE_9_length_169421_cov_26_785175	None	uncharacterized protein
417	COE1_sp002358575	COE1_sp002358575	K06908	2655	NODE_13_length_156099_cov_29_167568	None	uncharacterized protein
418	COE1_sp002358575	COE1_sp002358575	K06908	5415	NODE_21_length_104165_cov_45_301162	None	uncharacterized protein
419	COE1_sp002358575	COE1_sp002358575	K02945	421	NODE_9_length_169421_cov_26_785175	None	small subunit ribosomal protein S1
420	COE1_sp002358575	COE1_sp002358575	K01069	587	NODE_9_length_169421_cov_26_785175	None	hydroxyacylglutathione hydrolase [EC:3.1.2.6]
421	COE1_sp002358575	COE1_sp002358575	K01914	460	NODE_9_length_169421_cov_26_785175	None	aspartate--ammonia ligase [EC:6.3.1.1]
422	COE1_sp002358575	COE1_sp002358575	K00575	3971	NODE_17_length_124411_cov_36_225466	None	chemotaxis protein methyltransferase CheR [EC:2.1.1.80]
423	COE1_sp002358575	COE1_sp002358575	K00575	422	NODE_9_length_169421_cov_26_785175	None	chemotaxis protein methyltransferase CheR [EC:2.1.1.80]
424	COE1_sp002358575	COE1_sp002358575	K00986	3592	NODE_15_length_152018_cov_30_070583	None	RNA-directed DNA polymerase [EC:2.7.7.49]
425	COE1_sp002358575	COE1_sp002358575	K00986	2673	NODE_13_length_156099_cov_29_167568	None	RNA-directed DNA polymerase [EC:2.7.7.49]
426	COE1_sp002358575	COE1_sp002358575	K00986	530	NODE_9_length_169421_cov_26_785175	None	RNA-directed DNA polymerase [EC:2.7.7.49]
427	COE1_sp002358575	COE1_sp002358575	K00945	16225	NODE_1_length_310843_cov_41_188463	None	CMP/dCMP kinase [EC:2.7.4.25]
428	COE1_sp002358575	COE1_sp002358575	K00945	16994	NODE_2_length_254332_cov_28_949484	None	CMP/dCMP kinase [EC:2.7.4.25]
429	COE1_sp002358575	COE1_sp002358575	K00945	419	NODE_9_length_169421_cov_26_785175	None	CMP/dCMP kinase [EC:2.7.4.25]
430	COE1_sp002358575	COE1_sp002358575	K00945	3014	NODE_14_length_153927_cov_29_889811	None	CMP/dCMP kinase [EC:2.7.4.25]
431	COE1_sp002358575	COE1_sp002358575	K00945	2182	NODE_12_length_162894_cov_27_263954	None	CMP/dCMP kinase [EC:2.7.4.25]
432	COE1_sp002358575	COE1_sp002358575	K00945	12893	NODE_39_length_45945_cov_35_193702	None	CMP/dCMP kinase [EC:2.7.4.25]
433	COE1_sp002358575	COE1_sp002358575	K01866	543	NODE_9_length_169421_cov_26_785175	None	tyrosyl-tRNA synthetase [EC:6.1.1.1]
434	COE1_sp002358575	COE1_sp002358575	K09989	576	NODE_9_length_169421_cov_26_785175	None	uncharacterized protein
435	COE1_sp002358575	COE1_sp002358575	K02837	444	NODE_9_length_169421_cov_26_785175	None	peptide chain release factor 3
436	COE1_sp002358575	COE1_sp002358575	K03308	434	NODE_9_length_169421_cov_26_785175	None	neurotransmitter:Na+ symporter, NSS family
437	COE1_sp002358575	COE1_sp002358575	K13020	547	NODE_9_length_169421_cov_26_785175	None	UDP-N-acetyl-2-amino-2-deoxyglucuronate dehydrogenase [EC:1.1.1.335]
438	COE1_sp002358575	COE1_sp002358575	K03783	579	NODE_9_length_169421_cov_26_785175	None	purine-nucleoside phosphorylase [EC:2.4.2.1]
439	COE1_sp002358575	COE1_sp002358575	K03631	455	NODE_9_length_169421_cov_26_785175	None	DNA repair protein RecN (Recombination protein N)
440	COE1_sp002358575	COE1_sp002358575	K03625	447	NODE_9_length_169421_cov_26_785175	None	transcription antitermination protein NusB
441	COE1_sp002358575	COE1_sp002358575	K03977	572	NODE_9_length_169421_cov_26_785175	None	GTPase
442	COE1_sp002358575	COE1_sp002358575	K00661	435	NODE_9_length_169421_cov_26_785175	None	maltose O-acetyltransferase [EC:2.3.1.79]
443	COE1_sp002358575	COE1_sp002358575	K00661	18484	NODE_69_length_17837_cov_34_971263	None	maltose O-acetyltransferase [EC:2.3.1.79]
444	COE1_sp002358575	COE1_sp002358575	K17686	462	NODE_9_length_169421_cov_26_785175	None	P-type Cu+ transporter [EC:7.2.2.8]
445	COE1_sp002358575	COE1_sp002358575	K07497	14016	NODE_42_length_44558_cov_29_045278	None	putative transposase
446	COE1_sp002358575	COE1_sp002358575	K07497	14017	NODE_42_length_44558_cov_29_045278	None	putative transposase
447	COE1_sp002358575	COE1_sp002358575	K07497	18903	NODE_6_length_217817_cov_47_846323	None	putative transposase
448	COE1_sp002358575	COE1_sp002358575	K07497	18389	NODE_5_length_232515_cov_36_962832	None	putative transposase
449	COE1_sp002358575	COE1_sp002358575	K07497	18966	NODE_6_length_217817_cov_47_846323	None	putative transposase
450	COE1_sp002358575	COE1_sp002358575	K07497	17975	NODE_4_length_244402_cov_28_435774	None	putative transposase
451	COE1_sp002358575	COE1_sp002358575	K07497	15546	NODE_51_length_28521_cov_59_741762	None	putative transposase
452	COE1_sp002358575	COE1_sp002358575	K07497	18940	NODE_6_length_217817_cov_47_846323	None	putative transposase
453	COE1_sp002358575	COE1_sp002358575	K07497	606	NODE_81_length_15387_cov_36_545526	None	putative transposase
454	COE1_sp002358575	COE1_sp002358575	K13019	566	NODE_9_length_169421_cov_26_785175	None	UDP-GlcNAc3NAcA epimerase [EC:5.1.3.23]
455	COE1_sp002358575	COE1_sp002358575	K06400	11011	NODE_33_length_56764_cov_56_217302	None	site-specific DNA recombinase
456	COE1_sp002358575	COE1_sp002358575	K06400	17807	NODE_4_length_244402_cov_28_435774	None	site-specific DNA recombinase
457	COE1_sp002358575	COE1_sp002358575	K06400	1692	NODE_90_length_14861_cov_42_000405	None	site-specific DNA recombinase
458	COE1_sp002358575	COE1_sp002358575	K06400	18465	NODE_5_length_232515_cov_36_962832	None	site-specific DNA recombinase
459	COE1_sp002358575	COE1_sp002358575	K06400	18469	NODE_5_length_232515_cov_36_962832	None	site-specific DNA recombinase
460	COE1_sp002358575	COE1_sp002358575	K06400	16172	NODE_1_length_310843_cov_41_188463	None	site-specific DNA recombinase
461	COE1_sp002358575	COE1_sp002358575	K06400	18348	NODE_5_length_232515_cov_36_962832	None	site-specific DNA recombinase
462	COE1_sp002358575	COE1_sp002358575	K06400	18350	NODE_5_length_232515_cov_36_962832	None	site-specific DNA recombinase
463	COE1_sp002358575	COE1_sp002358575	K06400	18349	NODE_5_length_232515_cov_36_962832	None	site-specific DNA recombinase
464	COE1_sp002358575	COE1_sp002358575	K06400	16944	NODE_2_length_254332_cov_28_949484	None	site-specific DNA recombinase
465	COE1_sp002358575	COE1_sp002358575	K06400	2611	NODE_13_length_156099_cov_29_167568	None	site-specific DNA recombinase
466	COE1_sp002358575	COE1_sp002358575	K06400	11060	NODE_33_length_56764_cov_56_217302	None	site-specific DNA recombinase
467	COE1_sp002358575	COE1_sp002358575	K06400	11063	NODE_33_length_56764_cov_56_217302	None	site-specific DNA recombinase
468	COE1_sp002358575	COE1_sp002358575	K06400	20173	NODE_8_length_170500_cov_36_861334	None	site-specific DNA recombinase
469	COE1_sp002358575	COE1_sp002358575	K06400	18002	NODE_65_length_19489_cov_27_308017	None	site-specific DNA recombinase
470	COE1_sp002358575	COE1_sp002358575	K06400	18003	NODE_65_length_19489_cov_27_308017	None	site-specific DNA recombinase
471	COE1_sp002358575	COE1_sp002358575	K06400	601	NODE_9_length_169421_cov_26_785175	None	site-specific DNA recombinase
472	COE1_sp002358575	COE1_sp002358575	K06400	5362	NODE_21_length_104165_cov_45_301162	None	site-specific DNA recombinase
473	COE1_sp002358575	COE1_sp002358575	K06400	5363	NODE_21_length_104165_cov_45_301162	None	site-specific DNA recombinase
474	COE1_sp002358575	COE1_sp002358575	K06400	5364	NODE_21_length_104165_cov_45_301162	None	site-specific DNA recombinase
475	COE1_sp002358575	COE1_sp002358575	K06400	5367	NODE_21_length_104165_cov_45_301162	None	site-specific DNA recombinase
476	COE1_sp002358575	COE1_sp002358575	K13018	549	NODE_9_length_169421_cov_26_785175	None	UDP-2-acetamido-3-amino-2,3-dideoxy-glucuronate N-acetyltransferase [EC:2.3.1.201]
477	COE1_sp002358575	COE1_sp002358575	K06398	578	NODE_9_length_169421_cov_26_785175	None	stage IV sporulation protein A
478	COE1_sp002358575	COE1_sp002358575	K15051	432	NODE_9_length_169421_cov_26_785175	None	DNA-entry nuclease
479	COE1_sp002358575	COE1_sp002358575	K07496	544	NODE_9_length_169421_cov_26_785175	None	putative transposase
480	COE1_sp002358575	COE1_sp002358575	K07496	16385	NODE_1_length_310843_cov_41_188463	None	putative transposase
481	COE1_sp002358575	COE1_sp002358575	K07496	3042	NODE_14_length_153927_cov_29_889811	None	putative transposase
482	COE1_sp002358575	COE1_sp002358575	K07496	9921	NODE_31_length_58868_cov_53_529152	None	putative transposase
483	COE1_sp002358575	COE1_sp002358575	K07496	19044	NODE_6_length_217817_cov_47_846323	None	putative transposase
484	COE1_sp002358575	COE1_sp002358575	K07496	3995	NODE_17_length_124411_cov_36_225466	None	putative transposase
485	COE1_sp002358575	COE1_sp002358575	K07496	19462	NODE_7_length_184084_cov_31_685512	None	putative transposase
486	COE1_sp002358575	COE1_sp002358575	K07496	3899	NODE_17_length_124411_cov_36_225466	None	putative transposase
487	COE1_sp002358575	COE1_sp002358575	K07496	2697	NODE_108_length_12659_cov_67_218185	None	putative transposase
488	COE1_sp002358575	COE1_sp002358575	K07496	5356	NODE_21_length_104165_cov_45_301162	None	putative transposase
489	COE1_sp002358575	COE1_sp002358575	K07496	17269	NODE_3_length_245677_cov_33_343463	None	putative transposase
490	COE1_sp002358575	COE1_sp002358575	K07496	1658	NODE_11_length_165420_cov_36_304478	None	putative transposase
491	COE1_sp002358575	COE1_sp002358575	K07496	9370	NODE_30_length_61880_cov_33_616013	None	putative transposase
492	COE1_sp002358575	COE1_sp002358575	K07496	16347	NODE_1_length_310843_cov_41_188463	None	putative transposase
493	COE1_sp002358575	COE1_sp002358575	K07496	19548	NODE_7_length_184084_cov_31_685512	None	putative transposase
494	COE1_sp002358575	COE1_sp002358575	K07496	16381	NODE_1_length_310843_cov_41_188463	None	putative transposase
495	COE1_sp002358575	COE1_sp002358575	K07496	19006	NODE_6_length_217817_cov_47_846323	None	putative transposase
496	COE1_sp002358575	COE1_sp002358575	K07482	542	NODE_9_length_169421_cov_26_785175	None	transposase, IS30 family
497	COE1_sp002358575	COE1_sp002358575	K18785	4705	NODE_20_length_104815_cov_34_771325	None	beta-1,4-mannooligosaccharide/beta-1,4-mannosyl-N-acetylglucosamine phosphorylase [EC:2.4.1.319 2.4.1.320]
498	COE1_sp002358575	COE1_sp002358575	K18785	4723	NODE_20_length_104815_cov_34_771325	None	beta-1,4-mannooligosaccharide/beta-1,4-mannosyl-N-acetylglucosamine phosphorylase [EC:2.4.1.319 2.4.1.320]
499	COE1_sp002358575	COE1_sp002358575	K18785	19597	NODE_7_length_184084_cov_31_685512	None	beta-1,4-mannooligosaccharide/beta-1,4-mannosyl-N-acetylglucosamine phosphorylase [EC:2.4.1.319 2.4.1.320]
500	COE1_sp002358575	COE1_sp002358575	K07706	19648	NODE_71_length_17404_cov_43_909447	None	two-component system, LytTR family, sensor histidine kinase AgrC [EC:2.7.13.3]
501	COE1_sp002358575	COE1_sp002358575	K07706	19488	NODE_7_length_184084_cov_31_685512	None	two-component system, LytTR family, sensor histidine kinase AgrC [EC:2.7.13.3]
502	COE1_sp002358575	COE1_sp002358575	K07706	3066	NODE_14_length_153927_cov_29_889811	None	two-component system, LytTR family, sensor histidine kinase AgrC [EC:2.7.13.3]
503	COE1_sp002358575	COE1_sp002358575	K07706	1060	NODE_10_length_168523_cov_33_488116	None	two-component system, LytTR family, sensor histidine kinase AgrC [EC:2.7.13.3]
504	COE1_sp002358575	COE1_sp002358575	K07706	18341	NODE_5_length_232515_cov_36_962832	None	two-component system, LytTR family, sensor histidine kinase AgrC [EC:2.7.13.3]
505	COE1_sp002358575	COE1_sp002358575	K07706	1030	NODE_10_length_168523_cov_33_488116	None	two-component system, LytTR family, sensor histidine kinase AgrC [EC:2.7.13.3]
506	COE1_sp002358575	COE1_sp002358575	K07706	1190	NODE_86_length_15137_cov_82_926601	None	two-component system, LytTR family, sensor histidine kinase AgrC [EC:2.7.13.3]
507	COE1_sp002358575	COE1_sp002358575	K07706	17800	NODE_4_length_244402_cov_28_435774	None	two-component system, LytTR family, sensor histidine kinase AgrC [EC:2.7.13.3]
508	COE1_sp002358575	COE1_sp002358575	K07706	18918	NODE_6_length_217817_cov_47_846323	None	two-component system, LytTR family, sensor histidine kinase AgrC [EC:2.7.13.3]
509	COE1_sp002358575	COE1_sp002358575	K07706	3919	NODE_17_length_124411_cov_36_225466	None	two-component system, LytTR family, sensor histidine kinase AgrC [EC:2.7.13.3]
510	COE1_sp002358575	COE1_sp002358575	K07706	12880	NODE_39_length_45945_cov_35_193702	None	two-component system, LytTR family, sensor histidine kinase AgrC [EC:2.7.13.3]
511	COE1_sp002358575	COE1_sp002358575	K07706	2609	NODE_13_length_156099_cov_29_167568	None	two-component system, LytTR family, sensor histidine kinase AgrC [EC:2.7.13.3]
512	COE1_sp002358575	COE1_sp002358575	K07706	17819	NODE_4_length_244402_cov_28_435774	None	two-component system, LytTR family, sensor histidine kinase AgrC [EC:2.7.13.3]
513	COE1_sp002358575	COE1_sp002358575	K07706	20053	NODE_8_length_170500_cov_36_861334	None	two-component system, LytTR family, sensor histidine kinase AgrC [EC:2.7.13.3]
514	COE1_sp002358575	COE1_sp002358575	K07706	11034	NODE_33_length_56764_cov_56_217302	None	two-component system, LytTR family, sensor histidine kinase AgrC [EC:2.7.13.3]
515	COE1_sp002358575	COE1_sp002358575	K07706	1115	NODE_10_length_168523_cov_33_488116	None	two-component system, LytTR family, sensor histidine kinase AgrC [EC:2.7.13.3]
516	COE1_sp002358575	COE1_sp002358575	K07706	1183	NODE_10_length_168523_cov_33_488116	None	two-component system, LytTR family, sensor histidine kinase AgrC [EC:2.7.13.3]
517	COE1_sp002358575	COE1_sp002358575	K03406	9345	NODE_30_length_61880_cov_33_616013	None	methyl-accepting chemotaxis protein
518	COE1_sp002358575	COE1_sp002358575	K03406	19587	NODE_7_length_184084_cov_31_685512	None	methyl-accepting chemotaxis protein
519	COE1_sp002358575	COE1_sp002358575	K03406	4362	NODE_19_length_114258_cov_32_274616	None	methyl-accepting chemotaxis protein
520	COE1_sp002358575	COE1_sp002358575	K03406	6155	NODE_22_length_91632_cov_44_239219	None	methyl-accepting chemotaxis protein
521	COE1_sp002358575	COE1_sp002358575	K03406	4363	NODE_19_length_114258_cov_32_274616	None	methyl-accepting chemotaxis protein
522	COE1_sp002358575	COE1_sp002358575	K03406	3469	NODE_15_length_152018_cov_30_070583	None	methyl-accepting chemotaxis protein
523	COE1_sp002358575	COE1_sp002358575	K03406	18958	NODE_6_length_217817_cov_47_846323	None	methyl-accepting chemotaxis protein
524	COE1_sp002358575	COE1_sp002358575	K03406	19601	NODE_7_length_184084_cov_31_685512	None	methyl-accepting chemotaxis protein
525	COE1_sp002358575	COE1_sp002358575	K03406	17426	NODE_3_length_245677_cov_33_343463	None	methyl-accepting chemotaxis protein
526	COE1_sp002358575	COE1_sp002358575	K03406	16422	NODE_1_length_310843_cov_41_188463	None	methyl-accepting chemotaxis protein
527	COE1_sp002358575	COE1_sp002358575	K03406	11563	NODE_34_length_54257_cov_30_003671	None	methyl-accepting chemotaxis protein
528	COE1_sp002358575	COE1_sp002358575	K03406	16182	NODE_1_length_310843_cov_41_188463	None	methyl-accepting chemotaxis protein
529	COE1_sp002358575	COE1_sp002358575	K03406	14014	NODE_42_length_44558_cov_29_045278	None	methyl-accepting chemotaxis protein
530	COE1_sp002358575	COE1_sp002358575	K03406	17855	NODE_4_length_244402_cov_28_435774	None	methyl-accepting chemotaxis protein
531	COE1_sp002358575	COE1_sp002358575	K03406	19011	NODE_6_length_217817_cov_47_846323	None	methyl-accepting chemotaxis protein
532	COE1_sp002358575	COE1_sp002358575	K03406	16199	NODE_1_length_310843_cov_41_188463	None	methyl-accepting chemotaxis protein
533	COE1_sp002358575	COE1_sp002358575	K03406	456	NODE_9_length_169421_cov_26_785175	None	methyl-accepting chemotaxis protein
534	COE1_sp002358575	COE1_sp002358575	K03406	13267	NODE_40_length_45171_cov_34_006805	None	methyl-accepting chemotaxis protein
535	COE1_sp002358575	COE1_sp002358575	K03406	13268	NODE_40_length_45171_cov_34_006805	None	methyl-accepting chemotaxis protein
536	COE1_sp002358575	COE1_sp002358575	K03406	13269	NODE_40_length_45171_cov_34_006805	None	methyl-accepting chemotaxis protein
537	COE1_sp002358575	COE1_sp002358575	K03406	20052	NODE_8_length_170500_cov_36_861334	None	methyl-accepting chemotaxis protein
538	COE1_sp002358575	COE1_sp002358575	K03406	1626	NODE_11_length_165420_cov_36_304478	None	methyl-accepting chemotaxis protein
539	COE1_sp002358575	COE1_sp002358575	K03406	17374	NODE_3_length_245677_cov_33_343463	None	methyl-accepting chemotaxis protein
540	COE1_sp002358575	COE1_sp002358575	K03406	4320	NODE_19_length_114258_cov_32_274616	None	methyl-accepting chemotaxis protein
541	COE1_sp002358575	COE1_sp002358575	K03406	20069	NODE_8_length_170500_cov_36_861334	None	methyl-accepting chemotaxis protein
542	COE1_sp002358575	COE1_sp002358575	K03406	6886	NODE_23_length_87707_cov_31_767250	None	methyl-accepting chemotaxis protein
543	COE1_sp002358575	COE1_sp002358575	K03406	3943	NODE_17_length_124411_cov_36_225466	None	methyl-accepting chemotaxis protein
544	COE1_sp002358575	COE1_sp002358575	K03406	12010	NODE_36_length_52946_cov_27_366357	None	methyl-accepting chemotaxis protein
545	COE1_sp002358575	COE1_sp002358575	K03406	15856	NODE_52_length_25856_cov_36_804891	None	methyl-accepting chemotaxis protein
546	COE1_sp002358575	COE1_sp002358575	K03406	16498	NODE_53_length_25696_cov_32_287274	None	methyl-accepting chemotaxis protein
547	COE1_sp002358575	COE1_sp002358575	K03406	2166	NODE_12_length_162894_cov_27_263954	None	methyl-accepting chemotaxis protein
548	COE1_sp002358575	COE1_sp002358575	K03406	17914	NODE_4_length_244402_cov_28_435774	None	methyl-accepting chemotaxis protein
549	COE1_sp002358575	COE1_sp002358575	K03406	3579	NODE_15_length_152018_cov_30_070583	None	methyl-accepting chemotaxis protein
550	COE1_sp002358575	COE1_sp002358575	K02687	19514	NODE_7_length_184084_cov_31_685512	None	ribosomal protein L11 methyltransferase [EC:2.1.1.-]
551	COE1_sp002358575	COE1_sp002358575	K04751	19581	NODE_7_length_184084_cov_31_685512	None	nitrogen regulatory protein P-II 1
552	COE1_sp002358575	COE1_sp002358575	K01990	11552	NODE_34_length_54257_cov_30_003671	None	ABC-2 type transport system ATP-binding protein
553	COE1_sp002358575	COE1_sp002358575	K01990	17790	NODE_4_length_244402_cov_28_435774	None	ABC-2 type transport system ATP-binding protein
554	COE1_sp002358575	COE1_sp002358575	K01990	18947	NODE_6_length_217817_cov_47_846323	None	ABC-2 type transport system ATP-binding protein
555	COE1_sp002358575	COE1_sp002358575	K01990	18406	NODE_5_length_232515_cov_36_962832	None	ABC-2 type transport system ATP-binding protein
556	COE1_sp002358575	COE1_sp002358575	K01990	18895	NODE_6_length_217817_cov_47_846323	None	ABC-2 type transport system ATP-binding protein
557	COE1_sp002358575	COE1_sp002358575	K01990	16786	NODE_2_length_254332_cov_28_949484	None	ABC-2 type transport system ATP-binding protein
558	COE1_sp002358575	COE1_sp002358575	K01990	19540	NODE_7_length_184084_cov_31_685512	None	ABC-2 type transport system ATP-binding protein
559	COE1_sp002358575	COE1_sp002358575	K01990	20087	NODE_8_length_170500_cov_36_861334	None	ABC-2 type transport system ATP-binding protein
560	COE1_sp002358575	COE1_sp002358575	K01990	18392	NODE_5_length_232515_cov_36_962832	None	ABC-2 type transport system ATP-binding protein
561	COE1_sp002358575	COE1_sp002358575	K01990	8826	NODE_29_length_66002_cov_45_489469	None	ABC-2 type transport system ATP-binding protein
562	COE1_sp002358575	COE1_sp002358575	K01990	16860	NODE_2_length_254332_cov_28_949484	None	ABC-2 type transport system ATP-binding protein
563	COE1_sp002358575	COE1_sp002358575	K01990	17982	NODE_4_length_244402_cov_28_435774	None	ABC-2 type transport system ATP-binding protein
564	COE1_sp002358575	COE1_sp002358575	K01990	4383	NODE_238_length_7523_cov_32_543921	None	ABC-2 type transport system ATP-binding protein
565	COE1_sp002358575	COE1_sp002358575	K01992	11553	NODE_34_length_54257_cov_30_003671	None	ABC-2 type transport system permease protein
566	COE1_sp002358575	COE1_sp002358575	K01992	16467	NODE_1_length_310843_cov_41_188463	None	ABC-2 type transport system permease protein
567	COE1_sp002358575	COE1_sp002358575	K01992	19541	NODE_7_length_184084_cov_31_685512	None	ABC-2 type transport system permease protein
568	COE1_sp002358575	COE1_sp002358575	K03798	8237	NODE_28_length_66823_cov_33_512940	None	cell division protease FtsH [EC:3.4.24.-]
569	COE1_sp002358575	COE1_sp002358575	K03798	19605	NODE_7_length_184084_cov_31_685512	None	cell division protease FtsH [EC:3.4.24.-]
570	COE1_sp002358575	COE1_sp002358575	K07448	19471	NODE_7_length_184084_cov_31_685512	None	restriction system protein
571	COE1_sp002358575	COE1_sp002358575	K07407	14019	NODE_42_length_44558_cov_29_045278	None	alpha-galactosidase [EC:3.2.1.22]
572	COE1_sp002358575	COE1_sp002358575	K07407	19588	NODE_7_length_184084_cov_31_685512	None	alpha-galactosidase [EC:3.2.1.22]
573	COE1_sp002358575	COE1_sp002358575	K07407	14020	NODE_42_length_44558_cov_29_045278	None	alpha-galactosidase [EC:3.2.1.22]
574	COE1_sp002358575	COE1_sp002358575	K07407	3565	NODE_15_length_152018_cov_30_070583	None	alpha-galactosidase [EC:3.2.1.22]
575	COE1_sp002358575	COE1_sp002358575	K07407	2195	NODE_12_length_162894_cov_27_263954	None	alpha-galactosidase [EC:3.2.1.22]
576	COE1_sp002358575	COE1_sp002358575	K07407	16414	NODE_1_length_310843_cov_41_188463	None	alpha-galactosidase [EC:3.2.1.22]
577	COE1_sp002358575	COE1_sp002358575	K02033	3545	NODE_15_length_152018_cov_30_070583	None	peptide/nickel transport system permease protein
578	COE1_sp002358575	COE1_sp002358575	K02033	19631	NODE_7_length_184084_cov_31_685512	None	peptide/nickel transport system permease protein
579	COE1_sp002358575	COE1_sp002358575	K19956	19535	NODE_7_length_184084_cov_31_685512	None	L-sorbose 1-phosphate reductase [EC:1.1.1.-]
580	COE1_sp002358575	COE1_sp002358575	K09761	19516	NODE_7_length_184084_cov_31_685512	None	16S rRNA (uracil1498-N3)-methyltransferase [EC:2.1.1.193]
581	COE1_sp002358575	COE1_sp002358575	K02030	19624	NODE_7_length_184084_cov_31_685512	None	polar amino acid transport system substrate-binding protein
582	COE1_sp002358575	COE1_sp002358575	K02030	3053	NODE_14_length_153927_cov_29_889811	None	polar amino acid transport system substrate-binding protein
583	COE1_sp002358575	COE1_sp002358575	K03071	19576	NODE_7_length_184084_cov_31_685512	None	preprotein translocase subunit SecB
584	COE1_sp002358575	COE1_sp002358575	K03703	19606	NODE_7_length_184084_cov_31_685512	None	excinuclease ABC subunit C
585	COE1_sp002358575	COE1_sp002358575	K08483	19538	NODE_7_length_184084_cov_31_685512	None	phosphoenolpyruvate-protein phosphotransferase (PTS system enzyme I) [EC:2.7.3.9]
586	COE1_sp002358575	COE1_sp002358575	K04487	19517	NODE_7_length_184084_cov_31_685512	None	cysteine desulfurase [EC:2.8.1.7]
587	COE1_sp002358575	COE1_sp002358575	K04487	17479	NODE_59_length_21357_cov_30_720026	None	cysteine desulfurase [EC:2.8.1.7]
588	COE1_sp002358575	COE1_sp002358575	K02784	19537	NODE_7_length_184084_cov_31_685512	None	phosphocarrier protein HPr
589	COE1_sp002358575	COE1_sp002358575	K02784	1570	NODE_11_length_165420_cov_36_304478	None	phosphocarrier protein HPr
590	COE1_sp002358575	COE1_sp002358575	K02784	18485	NODE_69_length_17837_cov_34_971263	None	phosphocarrier protein HPr
591	COE1_sp002358575	COE1_sp002358575	K02035	3544	NODE_15_length_152018_cov_30_070583	None	peptide/nickel transport system substrate-binding protein
592	COE1_sp002358575	COE1_sp002358575	K02035	19630	NODE_7_length_184084_cov_31_685512	None	peptide/nickel transport system substrate-binding protein
593	COE1_sp002358575	COE1_sp002358575	K02800	19534	NODE_7_length_184084_cov_31_685512	None	mannitol PTS system EIICBA or EIICB component [EC:2.7.1.197]
594	COE1_sp002358575	COE1_sp002358575	K04043	19510	NODE_7_length_184084_cov_31_685512	None	molecular chaperone DnaK
595	COE1_sp002358575	COE1_sp002358575	K03705	19508	NODE_7_length_184084_cov_31_685512	None	heat-inducible transcriptional repressor
596	COE1_sp002358575	COE1_sp002358575	K03088	19075	NODE_70_length_17607_cov_36_690292	None	RNA polymerase sigma-70 factor, ECF subfamily
597	COE1_sp002358575	COE1_sp002358575	K03088	11012	NODE_33_length_56764_cov_56_217302	None	RNA polymerase sigma-70 factor, ECF subfamily
598	COE1_sp002358575	COE1_sp002358575	K03088	2693	NODE_108_length_12659_cov_67_218185	None	RNA polymerase sigma-70 factor, ECF subfamily
599	COE1_sp002358575	COE1_sp002358575	K03088	8232	NODE_28_length_66823_cov_33_512940	None	RNA polymerase sigma-70 factor, ECF subfamily
600	COE1_sp002358575	COE1_sp002358575	K03088	19498	NODE_7_length_184084_cov_31_685512	None	RNA polymerase sigma-70 factor, ECF subfamily
601	COE1_sp002358575	COE1_sp002358575	K03088	2700	NODE_108_length_12659_cov_67_218185	None	RNA polymerase sigma-70 factor, ECF subfamily
602	COE1_sp002358575	COE1_sp002358575	K03088	3981	NODE_17_length_124411_cov_36_225466	None	RNA polymerase sigma-70 factor, ECF subfamily
603	COE1_sp002358575	COE1_sp002358575	K03088	17967	NODE_4_length_244402_cov_28_435774	None	RNA polymerase sigma-70 factor, ECF subfamily
604	COE1_sp002358575	COE1_sp002358575	K03088	17776	NODE_4_length_244402_cov_28_435774	None	RNA polymerase sigma-70 factor, ECF subfamily
605	COE1_sp002358575	COE1_sp002358575	K03088	16177	NODE_1_length_310843_cov_41_188463	None	RNA polymerase sigma-70 factor, ECF subfamily
606	COE1_sp002358575	COE1_sp002358575	K03088	17297	NODE_3_length_245677_cov_33_343463	None	RNA polymerase sigma-70 factor, ECF subfamily
607	COE1_sp002358575	COE1_sp002358575	K03088	19475	NODE_7_length_184084_cov_31_685512	None	RNA polymerase sigma-70 factor, ECF subfamily
608	COE1_sp002358575	COE1_sp002358575	K03088	17970	NODE_4_length_244402_cov_28_435774	None	RNA polymerase sigma-70 factor, ECF subfamily
609	COE1_sp002358575	COE1_sp002358575	K03088	1690	NODE_90_length_14861_cov_42_000405	None	RNA polymerase sigma-70 factor, ECF subfamily
610	COE1_sp002358575	COE1_sp002358575	K03088	16858	NODE_2_length_254332_cov_28_949484	None	RNA polymerase sigma-70 factor, ECF subfamily
611	COE1_sp002358575	COE1_sp002358575	K03088	20060	NODE_8_length_170500_cov_36_861334	None	RNA polymerase sigma-70 factor, ECF subfamily
612	COE1_sp002358575	COE1_sp002358575	K03088	11037	NODE_33_length_56764_cov_56_217302	None	RNA polymerase sigma-70 factor, ECF subfamily
613	COE1_sp002358575	COE1_sp002358575	K03088	18878	NODE_6_length_217817_cov_47_846323	None	RNA polymerase sigma-70 factor, ECF subfamily
614	COE1_sp002358575	COE1_sp002358575	K01915	19539	NODE_7_length_184084_cov_31_685512	None	glutamine synthetase [EC:6.3.1.2]
615	COE1_sp002358575	COE1_sp002358575	K01915	3988	NODE_17_length_124411_cov_36_225466	None	glutamine synthetase [EC:6.3.1.2]
616	COE1_sp002358575	COE1_sp002358575	K11051	19541	NODE_7_length_184084_cov_31_685512	None	multidrug/hemolysin transport system permease protein
617	COE1_sp002358575	COE1_sp002358575	K18707	19520	NODE_7_length_184084_cov_31_685512	None	threonylcarbamoyladenosine tRNA methylthiotransferase MtaB [EC:2.8.4.5]
618	COE1_sp002358575	COE1_sp002358575	K03327	2594	NODE_13_length_156099_cov_29_167568	None	multidrug resistance protein, MATE family
619	COE1_sp002358575	COE1_sp002358575	K03327	17279	NODE_3_length_245677_cov_33_343463	None	multidrug resistance protein, MATE family
620	COE1_sp002358575	COE1_sp002358575	K03327	20133	NODE_8_length_170500_cov_36_861334	None	multidrug resistance protein, MATE family
621	COE1_sp002358575	COE1_sp002358575	K03327	19016	NODE_6_length_217817_cov_47_846323	None	multidrug resistance protein, MATE family
622	COE1_sp002358575	COE1_sp002358575	K03327	2153	NODE_12_length_162894_cov_27_263954	None	multidrug resistance protein, MATE family
623	COE1_sp002358575	COE1_sp002358575	K03327	19466	NODE_7_length_184084_cov_31_685512	None	multidrug resistance protein, MATE family
624	COE1_sp002358575	COE1_sp002358575	K03327	3082	NODE_14_length_153927_cov_29_889811	None	multidrug resistance protein, MATE family
625	COE1_sp002358575	COE1_sp002358575	K03327	16428	NODE_1_length_310843_cov_41_188463	None	multidrug resistance protein, MATE family
626	COE1_sp002358575	COE1_sp002358575	K03327	20146	NODE_8_length_170500_cov_36_861334	None	multidrug resistance protein, MATE family
627	COE1_sp002358575	COE1_sp002358575	K03327	4370	NODE_19_length_114258_cov_32_274616	None	multidrug resistance protein, MATE family
628	COE1_sp002358575	COE1_sp002358575	K03327	17428	NODE_3_length_245677_cov_33_343463	None	multidrug resistance protein, MATE family
629	COE1_sp002358575	COE1_sp002358575	K03327	17427	NODE_3_length_245677_cov_33_343463	None	multidrug resistance protein, MATE family
630	COE1_sp002358575	COE1_sp002358575	K03327	3543	NODE_15_length_152018_cov_30_070583	None	multidrug resistance protein, MATE family
631	COE1_sp002358575	COE1_sp002358575	K03327	19482	NODE_7_length_184084_cov_31_685512	None	multidrug resistance protein, MATE family
632	COE1_sp002358575	COE1_sp002358575	K03327	19483	NODE_7_length_184084_cov_31_685512	None	multidrug resistance protein, MATE family
633	COE1_sp002358575	COE1_sp002358575	K03327	14815	NODE_44_length_44096_cov_28_960650	None	multidrug resistance protein, MATE family
634	COE1_sp002358575	COE1_sp002358575	K11050	19540	NODE_7_length_184084_cov_31_685512	None	multidrug/hemolysin transport system ATP-binding protein
635	COE1_sp002358575	COE1_sp002358575	K02028	3052	NODE_14_length_153927_cov_29_889811	None	polar amino acid transport system ATP-binding protein [EC:7.4.2.1]
636	COE1_sp002358575	COE1_sp002358575	K02028	19622	NODE_7_length_184084_cov_31_685512	None	polar amino acid transport system ATP-binding protein [EC:7.4.2.1]
637	COE1_sp002358575	COE1_sp002358575	K08303	16879	NODE_2_length_254332_cov_28_949484	None	putative protease [EC:3.4.-.-]
638	COE1_sp002358575	COE1_sp002358575	K08303	19527	NODE_7_length_184084_cov_31_685512	None	putative protease [EC:3.4.-.-]
639	COE1_sp002358575	COE1_sp002358575	K12574	19524	NODE_7_length_184084_cov_31_685512	None	ribonuclease J [EC:3.1.-.-]
640	COE1_sp002358575	COE1_sp002358575	K10822	11552	NODE_34_length_54257_cov_30_003671	None	nonpolar-amino-acid-transporting ATPase [EC:7.4.2.2]
641	COE1_sp002358575	COE1_sp002358575	K10822	19622	NODE_7_length_184084_cov_31_685512	None	nonpolar-amino-acid-transporting ATPase [EC:7.4.2.2]
642	COE1_sp002358575	COE1_sp002358575	K10822	3052	NODE_14_length_153927_cov_29_889811	None	nonpolar-amino-acid-transporting ATPase [EC:7.4.2.2]
643	COE1_sp002358575	COE1_sp002358575	K10822	18416	NODE_5_length_232515_cov_36_962832	None	nonpolar-amino-acid-transporting ATPase [EC:7.4.2.2]
644	COE1_sp002358575	COE1_sp002358575	K10822	19615	NODE_7_length_184084_cov_31_685512	None	nonpolar-amino-acid-transporting ATPase [EC:7.4.2.2]
645	COE1_sp002358575	COE1_sp002358575	K03686	19511	NODE_7_length_184084_cov_31_685512	None	molecular chaperone DnaJ
646	COE1_sp002358575	COE1_sp002358575	K21744	19546	NODE_7_length_184084_cov_31_685512	None	MerR family transcriptional regulator, thiopeptide resistance regulator
647	COE1_sp002358575	COE1_sp002358575	K21744	18391	NODE_5_length_232515_cov_36_962832	None	MerR family transcriptional regulator, thiopeptide resistance regulator
648	COE1_sp002358575	COE1_sp002358575	K03320	19581	NODE_7_length_184084_cov_31_685512	None	ammonium transporter, Amt family
649	COE1_sp002358575	COE1_sp002358575	K07813	1184	NODE_10_length_168523_cov_33_488116	None	accessory gene regulator B
650	COE1_sp002358575	COE1_sp002358575	K07813	19649	NODE_71_length_17404_cov_43_909447	None	accessory gene regulator B
651	COE1_sp002358575	COE1_sp002358575	K07813	19490	NODE_7_length_184084_cov_31_685512	None	accessory gene regulator B
652	COE1_sp002358575	COE1_sp002358575	K07813	1029	NODE_10_length_168523_cov_33_488116	None	accessory gene regulator B
653	COE1_sp002358575	COE1_sp002358575	K07813	1062	NODE_10_length_168523_cov_33_488116	None	accessory gene regulator B
654	COE1_sp002358575	COE1_sp002358575	K07813	18343	NODE_5_length_232515_cov_36_962832	None	accessory gene regulator B
655	COE1_sp002358575	COE1_sp002358575	K07813	12876	NODE_39_length_45945_cov_35_193702	None	accessory gene regulator B
656	COE1_sp002358575	COE1_sp002358575	K07813	11035	NODE_33_length_56764_cov_56_217302	None	accessory gene regulator B
657	COE1_sp002358575	COE1_sp002358575	K03687	19509	NODE_7_length_184084_cov_31_685512	None	molecular chaperone GrpE
658	COE1_sp002358575	COE1_sp002358575	K07486	16163	NODE_1_length_310843_cov_41_188463	None	transposase
659	COE1_sp002358575	COE1_sp002358575	K07486	19652	NODE_71_length_17404_cov_43_909447	None	transposase
660	COE1_sp002358575	COE1_sp002358575	K07486	20101	NODE_8_length_170500_cov_36_861334	None	transposase
661	COE1_sp002358575	COE1_sp002358575	K07486	5290	NODE_21_length_104165_cov_45_301162	None	transposase
662	COE1_sp002358575	COE1_sp002358575	K07486	1134	NODE_10_length_168523_cov_33_488116	None	transposase
663	COE1_sp002358575	COE1_sp002358575	K07486	3125	NODE_14_length_153927_cov_29_889811	None	transposase
664	COE1_sp002358575	COE1_sp002358575	K07486	3126	NODE_14_length_153927_cov_29_889811	None	transposase
665	COE1_sp002358575	COE1_sp002358575	K07486	16953	NODE_2_length_254332_cov_28_949484	None	transposase
666	COE1_sp002358575	COE1_sp002358575	K16212	19595	NODE_7_length_184084_cov_31_685512	None	4-O-beta-D-mannosyl-D-glucose phosphorylase [EC:2.4.1.281]
667	COE1_sp002358575	COE1_sp002358575	K07082	19525	NODE_7_length_184084_cov_31_685512	None	UPF0755 protein
668	COE1_sp002358575	COE1_sp002358575	K06405	19494	NODE_7_length_184084_cov_31_685512	None	stage V sporulation protein AC
669	COE1_sp002358575	COE1_sp002358575	K01154	19529	NODE_7_length_184084_cov_31_685512	None	type I restriction enzyme, S subunit [EC:3.1.21.3]
670	COE1_sp002358575	COE1_sp002358575	K01154	13637	NODE_41_length_45064_cov_34_349663	None	type I restriction enzyme, S subunit [EC:3.1.21.3]
671	COE1_sp002358575	COE1_sp002358575	K01154	2236	NODE_97_length_13581_cov_36_298906	None	type I restriction enzyme, S subunit [EC:3.1.21.3]
672	COE1_sp002358575	COE1_sp002358575	K01154	18413	NODE_5_length_232515_cov_36_962832	None	type I restriction enzyme, S subunit [EC:3.1.21.3]
673	COE1_sp002358575	COE1_sp002358575	K06404	19493	NODE_7_length_184084_cov_31_685512	None	stage V sporulation protein AB
674	COE1_sp002358575	COE1_sp002358575	K16213	19594	NODE_7_length_184084_cov_31_685512	None	cellobiose epimerase [EC:5.1.3.11]
675	COE1_sp002358575	COE1_sp002358575	K23876	19503	NODE_7_length_184084_cov_31_685512	None	(R)-2-hydroxyacyl-CoA dehydratese activating ATPase [EC:5.6.1.9]
676	COE1_sp002358575	COE1_sp002358575	K11392	19481	NODE_7_length_184084_cov_31_685512	None	16S rRNA (cytosine1407-C5)-methyltransferase [EC:2.1.1.178]
677	COE1_sp002358575	COE1_sp002358575	K07447	19522	NODE_7_length_184084_cov_31_685512	None	putative holliday junction resolvase [EC:3.1.-.-]
678	COE1_sp002358575	COE1_sp002358575	K07321	19500	NODE_7_length_184084_cov_31_685512	None	CO dehydrogenase maturation factor
679	COE1_sp002358575	COE1_sp002358575	K03427	19528	NODE_7_length_184084_cov_31_685512	None	type I restriction enzyme M protein [EC:2.1.1.72]
680	COE1_sp002358575	COE1_sp002358575	K03427	18356	NODE_5_length_232515_cov_36_962832	None	type I restriction enzyme M protein [EC:2.1.1.72]
681	COE1_sp002358575	COE1_sp002358575	K03427	18412	NODE_5_length_232515_cov_36_962832	None	type I restriction enzyme M protein [EC:2.1.1.72]
682	COE1_sp002358575	COE1_sp002358575	K03427	13639	NODE_41_length_45064_cov_34_349663	None	type I restriction enzyme M protein [EC:2.1.1.72]
683	COE1_sp002358575	COE1_sp002358575	K06403	19492	NODE_7_length_184084_cov_31_685512	None	stage V sporulation protein AA
684	COE1_sp002358575	COE1_sp002358575	K01153	2234	NODE_97_length_13581_cov_36_298906	None	type I restriction enzyme, R subunit [EC:3.1.21.3]
685	COE1_sp002358575	COE1_sp002358575	K01153	19531	NODE_7_length_184084_cov_31_685512	None	type I restriction enzyme, R subunit [EC:3.1.21.3]
686	COE1_sp002358575	COE1_sp002358575	K01153	18414	NODE_5_length_232515_cov_36_962832	None	type I restriction enzyme, R subunit [EC:3.1.21.3]
687	COE1_sp002358575	COE1_sp002358575	K07495	18882	NODE_6_length_217817_cov_47_846323	None	putative transposase
688	COE1_sp002358575	COE1_sp002358575	K07495	16167	NODE_1_length_310843_cov_41_188463	None	putative transposase
689	COE1_sp002358575	COE1_sp002358575	K07495	2695	NODE_108_length_12659_cov_67_218185	None	putative transposase
690	COE1_sp002358575	COE1_sp002358575	K07495	19465	NODE_7_length_184084_cov_31_685512	None	putative transposase
691	COE1_sp002358575	COE1_sp002358575	K07495	11017	NODE_33_length_56764_cov_56_217302	None	putative transposase
692	COE1_sp002358575	COE1_sp002358575	K07495	16841	NODE_2_length_254332_cov_28_949484	None	putative transposase
693	COE1_sp002358575	COE1_sp002358575	K07495	16207	NODE_1_length_310843_cov_41_188463	None	putative transposase
694	COE1_sp002358575	COE1_sp002358575	K07495	20112	NODE_8_length_170500_cov_36_861334	None	putative transposase
695	COE1_sp002358575	COE1_sp002358575	K07495	19060	NODE_6_length_217817_cov_47_846323	None	putative transposase
696	COE1_sp002358575	COE1_sp002358575	K07495	19638	NODE_71_length_17404_cov_43_909447	None	putative transposase
697	COE1_sp002358575	COE1_sp002358575	K07495	9943	NODE_31_length_58868_cov_53_529152	None	putative transposase
698	COE1_sp002358575	COE1_sp002358575	K07495	18358	NODE_5_length_232515_cov_36_962832	None	putative transposase
699	COE1_sp002358575	COE1_sp002358575	K07495	3129	NODE_14_length_153927_cov_29_889811	None	putative transposase
700	COE1_sp002358575	COE1_sp002358575	K07495	15195	NODE_48_length_32985_cov_54_111995	None	putative transposase
701	COE1_sp002358575	COE1_sp002358575	K07495	12894	NODE_39_length_45945_cov_35_193702	None	putative transposase
702	COE1_sp002358575	COE1_sp002358575	K07495	6175	NODE_22_length_91632_cov_44_239219	None	putative transposase
703	COE1_sp002358575	COE1_sp002358575	K03790	1600	NODE_11_length_165420_cov_36_304478	None	[ribosomal protein S5]-alanine N-acetyltransferase [EC:2.3.1.267]
704	COE1_sp002358575	COE1_sp002358575	K03790	14799	NODE_44_length_44096_cov_28_960650	None	[ribosomal protein S5]-alanine N-acetyltransferase [EC:2.3.1.267]
705	COE1_sp002358575	COE1_sp002358575	K03790	1653	NODE_11_length_165420_cov_36_304478	None	[ribosomal protein S5]-alanine N-acetyltransferase [EC:2.3.1.267]
706	COE1_sp002358575	COE1_sp002358575	K03790	17942	NODE_4_length_244402_cov_28_435774	None	[ribosomal protein S5]-alanine N-acetyltransferase [EC:2.3.1.267]
707	COE1_sp002358575	COE1_sp002358575	K03790	19063	NODE_70_length_17607_cov_36_690292	None	[ribosomal protein S5]-alanine N-acetyltransferase [EC:2.3.1.267]
708	COE1_sp002358575	COE1_sp002358575	K03790	19580	NODE_7_length_184084_cov_31_685512	None	[ribosomal protein S5]-alanine N-acetyltransferase [EC:2.3.1.267]
709	COE1_sp002358575	COE1_sp002358575	K06023	13288	NODE_40_length_45171_cov_34_006805	None	HPr kinase/phosphorylase [EC:2.7.11.- 2.7.4.-]
710	COE1_sp002358575	COE1_sp002358575	K06958	13285	NODE_40_length_45171_cov_34_006805	None	RNase adapter protein RapZ
711	COE1_sp002358575	COE1_sp002358575	K01881	13300	NODE_40_length_45171_cov_34_006805	None	prolyl-tRNA synthetase [EC:6.1.1.15]
712	COE1_sp002358575	COE1_sp002358575	K09762	13284	NODE_40_length_45171_cov_34_006805	None	uncharacterized protein
713	COE1_sp002358575	COE1_sp002358575	K07029	13283	NODE_40_length_45171_cov_34_006805	None	diacylglycerol kinase (ATP) [EC:2.7.1.107]
714	COE1_sp002358575	COE1_sp002358575	K01921	4735	NODE_20_length_104815_cov_34_771325	None	D-alanine-D-alanine ligase [EC:6.3.2.4]
715	COE1_sp002358575	COE1_sp002358575	K01921	13279	NODE_40_length_45171_cov_34_006805	None	D-alanine-D-alanine ligase [EC:6.3.2.4]
716	COE1_sp002358575	COE1_sp002358575	K07238	13266	NODE_40_length_45171_cov_34_006805	None	zinc transporter, ZIP family
717	COE1_sp002358575	COE1_sp002358575	K01929	13278	NODE_40_length_45171_cov_34_006805	None	UDP-N-acetylmuramoyl-tripeptide--D-alanyl-D-alanine ligase [EC:6.3.2.10]
718	COE1_sp002358575	COE1_sp002358575	K02823	13294	NODE_40_length_45171_cov_34_006805	None	dihydroorotate dehydrogenase electron transfer subunit
719	COE1_sp002358575	COE1_sp002358575	K00075	13286	NODE_40_length_45171_cov_34_006805	None	UDP-N-acetylmuramate dehydrogenase [EC:1.3.1.98]
720	COE1_sp002358575	COE1_sp002358575	K17319	4710	NODE_20_length_104815_cov_34_771325	None	putative aldouronate transport system permease protein
721	COE1_sp002358575	COE1_sp002358575	K17319	14022	NODE_42_length_44558_cov_29_045278	None	putative aldouronate transport system permease protein
722	COE1_sp002358575	COE1_sp002358575	K17319	2215	NODE_12_length_162894_cov_27_263954	None	putative aldouronate transport system permease protein
723	COE1_sp002358575	COE1_sp002358575	K17319	16778	NODE_2_length_254332_cov_28_949484	None	putative aldouronate transport system permease protein
724	COE1_sp002358575	COE1_sp002358575	K17319	19051	NODE_6_length_217817_cov_47_846323	None	putative aldouronate transport system permease protein
725	COE1_sp002358575	COE1_sp002358575	K17319	11567	NODE_34_length_54257_cov_30_003671	None	putative aldouronate transport system permease protein
726	COE1_sp002358575	COE1_sp002358575	K17319	4726	NODE_20_length_104815_cov_34_771325	None	putative aldouronate transport system permease protein
727	COE1_sp002358575	COE1_sp002358575	K17319	13272	NODE_40_length_45171_cov_34_006805	None	putative aldouronate transport system permease protein
728	COE1_sp002358575	COE1_sp002358575	K17319	16764	NODE_2_length_254332_cov_28_949484	None	putative aldouronate transport system permease protein
729	COE1_sp002358575	COE1_sp002358575	K17318	4708	NODE_20_length_104815_cov_34_771325	None	putative aldouronate transport system substrate-binding protein
730	COE1_sp002358575	COE1_sp002358575	K17318	14023	NODE_42_length_44558_cov_29_045278	None	putative aldouronate transport system substrate-binding protein
731	COE1_sp002358575	COE1_sp002358575	K17318	2217	NODE_12_length_162894_cov_27_263954	None	putative aldouronate transport system substrate-binding protein
732	COE1_sp002358575	COE1_sp002358575	K17318	2219	NODE_12_length_162894_cov_27_263954	None	putative aldouronate transport system substrate-binding protein
733	COE1_sp002358575	COE1_sp002358575	K17318	16780	NODE_2_length_254332_cov_28_949484	None	putative aldouronate transport system substrate-binding protein
734	COE1_sp002358575	COE1_sp002358575	K17318	19052	NODE_6_length_217817_cov_47_846323	None	putative aldouronate transport system substrate-binding protein
735	COE1_sp002358575	COE1_sp002358575	K17318	11566	NODE_34_length_54257_cov_30_003671	None	putative aldouronate transport system substrate-binding protein
736	COE1_sp002358575	COE1_sp002358575	K17318	11569	NODE_34_length_54257_cov_30_003671	None	putative aldouronate transport system substrate-binding protein
737	COE1_sp002358575	COE1_sp002358575	K17318	4724	NODE_20_length_104815_cov_34_771325	None	putative aldouronate transport system substrate-binding protein
738	COE1_sp002358575	COE1_sp002358575	K17318	13273	NODE_40_length_45171_cov_34_006805	None	putative aldouronate transport system substrate-binding protein
739	COE1_sp002358575	COE1_sp002358575	K17318	16766	NODE_2_length_254332_cov_28_949484	None	putative aldouronate transport system substrate-binding protein
740	COE1_sp002358575	COE1_sp002358575	K17320	14021	NODE_42_length_44558_cov_29_045278	None	putative aldouronate transport system permease protein
741	COE1_sp002358575	COE1_sp002358575	K17320	4709	NODE_20_length_104815_cov_34_771325	None	putative aldouronate transport system permease protein
742	COE1_sp002358575	COE1_sp002358575	K17320	2216	NODE_12_length_162894_cov_27_263954	None	putative aldouronate transport system permease protein
743	COE1_sp002358575	COE1_sp002358575	K17320	19050	NODE_6_length_217817_cov_47_846323	None	putative aldouronate transport system permease protein
744	COE1_sp002358575	COE1_sp002358575	K17320	16779	NODE_2_length_254332_cov_28_949484	None	putative aldouronate transport system permease protein
745	COE1_sp002358575	COE1_sp002358575	K17320	11568	NODE_34_length_54257_cov_30_003671	None	putative aldouronate transport system permease protein
746	COE1_sp002358575	COE1_sp002358575	K17320	4725	NODE_20_length_104815_cov_34_771325	None	putative aldouronate transport system permease protein
747	COE1_sp002358575	COE1_sp002358575	K17320	13271	NODE_40_length_45171_cov_34_006805	None	putative aldouronate transport system permease protein
748	COE1_sp002358575	COE1_sp002358575	K17320	16765	NODE_2_length_254332_cov_28_949484	None	putative aldouronate transport system permease protein
749	COE1_sp002358575	COE1_sp002358575	K07720	18403	NODE_5_length_232515_cov_36_962832	None	two-component system, response regulator YesN
750	COE1_sp002358575	COE1_sp002358575	K07720	14024	NODE_42_length_44558_cov_29_045278	None	two-component system, response regulator YesN
751	COE1_sp002358575	COE1_sp002358575	K07720	2218	NODE_12_length_162894_cov_27_263954	None	two-component system, response regulator YesN
752	COE1_sp002358575	COE1_sp002358575	K07720	11565	NODE_34_length_54257_cov_30_003671	None	two-component system, response regulator YesN
753	COE1_sp002358575	COE1_sp002358575	K07720	19053	NODE_6_length_217817_cov_47_846323	None	two-component system, response regulator YesN
754	COE1_sp002358575	COE1_sp002358575	K07720	17489	NODE_59_length_21357_cov_30_720026	None	two-component system, response regulator YesN
755	COE1_sp002358575	COE1_sp002358575	K07720	15538	NODE_51_length_28521_cov_59_741762	None	two-component system, response regulator YesN
756	COE1_sp002358575	COE1_sp002358575	K07720	13274	NODE_40_length_45171_cov_34_006805	None	two-component system, response regulator YesN
757	COE1_sp002358575	COE1_sp002358575	K06949	2117	NODE_12_length_162894_cov_27_263954	None	ribosome biogenesis GTPase / thiamine phosphate phosphatase [EC:3.6.1.- 3.1.3.100]
758	COE1_sp002358575	COE1_sp002358575	K03575	2157	NODE_12_length_162894_cov_27_263954	None	A/G-specific adenine glycosylase [EC:3.2.2.31]
759	COE1_sp002358575	COE1_sp002358575	K10119	15536	NODE_51_length_28521_cov_59_741762	None	raffinose/stachyose/melibiose transport system permease protein
760	COE1_sp002358575	COE1_sp002358575	K10119	2194	NODE_12_length_162894_cov_27_263954	None	raffinose/stachyose/melibiose transport system permease protein
761	COE1_sp002358575	COE1_sp002358575	K10119	6924	NODE_23_length_87707_cov_31_767250	None	raffinose/stachyose/melibiose transport system permease protein
762	COE1_sp002358575	COE1_sp002358575	K10119	15542	NODE_51_length_28521_cov_59_741762	None	raffinose/stachyose/melibiose transport system permease protein
763	COE1_sp002358575	COE1_sp002358575	K07473	2088	NODE_12_length_162894_cov_27_263954	None	DNA-damage-inducible protein J
764	COE1_sp002358575	COE1_sp002358575	K03563	2140	NODE_12_length_162894_cov_27_263954	None	carbon storage regulator
765	COE1_sp002358575	COE1_sp002358575	K03563	7591	NODE_24_length_84148_cov_32_163034	None	carbon storage regulator
766	COE1_sp002358575	COE1_sp002358575	K06973	2112	NODE_12_length_162894_cov_27_263954	None	uncharacterized protein
767	COE1_sp002358575	COE1_sp002358575	K07258	2209	NODE_12_length_162894_cov_27_263954	None	serine-type D-Ala-D-Ala carboxypeptidase (penicillin-binding protein 5/6) [EC:3.4.16.4]
768	COE1_sp002358575	COE1_sp002358575	K07258	18952	NODE_6_length_217817_cov_47_846323	None	serine-type D-Ala-D-Ala carboxypeptidase (penicillin-binding protein 5/6) [EC:3.4.16.4]
769	COE1_sp002358575	COE1_sp002358575	K07258	2220	NODE_12_length_162894_cov_27_263954	None	serine-type D-Ala-D-Ala carboxypeptidase (penicillin-binding protein 5/6) [EC:3.4.16.4]
770	COE1_sp002358575	COE1_sp002358575	K07258	17007	NODE_55_length_25111_cov_30_653416	None	serine-type D-Ala-D-Ala carboxypeptidase (penicillin-binding protein 5/6) [EC:3.4.16.4]
771	COE1_sp002358575	COE1_sp002358575	K07258	3006	NODE_14_length_153927_cov_29_889811	None	serine-type D-Ala-D-Ala carboxypeptidase (penicillin-binding protein 5/6) [EC:3.4.16.4]
772	COE1_sp002358575	COE1_sp002358575	K07258	17887	NODE_4_length_244402_cov_28_435774	None	serine-type D-Ala-D-Ala carboxypeptidase (penicillin-binding protein 5/6) [EC:3.4.16.4]
773	COE1_sp002358575	COE1_sp002358575	K12132	9337	NODE_30_length_61880_cov_33_616013	None	eukaryotic-like serine/threonine-protein kinase [EC:2.7.11.1]
774	COE1_sp002358575	COE1_sp002358575	K12132	2116	NODE_12_length_162894_cov_27_263954	None	eukaryotic-like serine/threonine-protein kinase [EC:2.7.11.1]
775	COE1_sp002358575	COE1_sp002358575	K07098	2210	NODE_12_length_162894_cov_27_263954	None	uncharacterized protein
776	COE1_sp002358575	COE1_sp002358575	K07098	17987	NODE_65_length_19489_cov_27_308017	None	uncharacterized protein
777	COE1_sp002358575	COE1_sp002358575	K21498	2084	NODE_12_length_162894_cov_27_263954	None	antitoxin HigA-1
778	COE1_sp002358575	COE1_sp002358575	K06972	2201	NODE_12_length_162894_cov_27_263954	None	presequence protease [EC:3.4.24.-]
779	COE1_sp002358575	COE1_sp002358575	K24119	2158	NODE_12_length_162894_cov_27_263954	None	NADH-dependent peroxiredoxin subunit C [EC:1.11.1.26]
780	COE1_sp002358575	COE1_sp002358575	K05896	2211	NODE_12_length_162894_cov_27_263954	None	segregation and condensation protein A
781	COE1_sp002358575	COE1_sp002358575	K06024	2212	NODE_12_length_162894_cov_27_263954	None	segregation and condensation protein B
782	COE1_sp002358575	COE1_sp002358575	K01880	2205	NODE_12_length_162894_cov_27_263954	None	glycyl-tRNA synthetase [EC:6.1.1.14]
783	COE1_sp002358575	COE1_sp002358575	K06915	2232	NODE_97_length_13581_cov_36_298906	None	uncharacterized protein
784	COE1_sp002358575	COE1_sp002358575	K06915	18419	NODE_5_length_232515_cov_36_962832	None	uncharacterized protein
785	COE1_sp002358575	COE1_sp002358575	K06915	16276	NODE_1_length_310843_cov_41_188463	None	uncharacterized protein
786	COE1_sp002358575	COE1_sp002358575	K03892	2160	NODE_12_length_162894_cov_27_263954	None	ArsR family transcriptional regulator, arsenate/arsenite/antimonite-responsive transcriptional repressor
787	COE1_sp002358575	COE1_sp002358575	K03500	2113	NODE_12_length_162894_cov_27_263954	None	16S rRNA (cytosine967-C5)-methyltransferase [EC:2.1.1.176]
788	COE1_sp002358575	COE1_sp002358575	K04045	4378	NODE_19_length_114258_cov_32_274616	None	molecular chaperone HscC
789	COE1_sp002358575	COE1_sp002358575	K04045	2175	NODE_12_length_162894_cov_27_263954	None	molecular chaperone HscC
790	COE1_sp002358575	COE1_sp002358575	K01869	2184	NODE_12_length_162894_cov_27_263954	None	leucyl-tRNA synthetase [EC:6.1.1.4]
791	COE1_sp002358575	COE1_sp002358575	K20509	2224	NODE_12_length_162894_cov_27_263954	None	carboxybiotin decarboxylase [EC:7.2.4.1]
792	COE1_sp002358575	COE1_sp002358575	K02970	2207	NODE_12_length_162894_cov_27_263954	None	small subunit ribosomal protein S21
793	COE1_sp002358575	COE1_sp002358575	K07171	18352	NODE_5_length_232515_cov_36_962832	None	mRNA interferase MazF [EC:3.1.-.-]
794	COE1_sp002358575	COE1_sp002358575	K07171	2059	NODE_12_length_162894_cov_27_263954	None	mRNA interferase MazF [EC:3.1.-.-]
795	COE1_sp002358575	COE1_sp002358575	K07171	17998	NODE_65_length_19489_cov_27_308017	None	mRNA interferase MazF [EC:3.1.-.-]
796	COE1_sp002358575	COE1_sp002358575	K05982	2128	NODE_12_length_162894_cov_27_263954	None	deoxyribonuclease V [EC:3.1.21.7]
797	COE1_sp002358575	COE1_sp002358575	K04068	2106	NODE_12_length_162894_cov_27_263954	None	anaerobic ribonucleoside-triphosphate reductase activating protein [EC:1.97.1.4]
798	COE1_sp002358575	COE1_sp002358575	K04068	16754	NODE_2_length_254332_cov_28_949484	None	anaerobic ribonucleoside-triphosphate reductase activating protein [EC:1.97.1.4]
799	COE1_sp002358575	COE1_sp002358575	K00384	5352	NODE_21_length_104165_cov_45_301162	None	thioredoxin reductase (NADPH) [EC:1.8.1.9]
800	COE1_sp002358575	COE1_sp002358575	K00384	13991	NODE_42_length_44558_cov_29_045278	None	thioredoxin reductase (NADPH) [EC:1.8.1.9]
801	COE1_sp002358575	COE1_sp002358575	K00384	2159	NODE_12_length_162894_cov_27_263954	None	thioredoxin reductase (NADPH) [EC:1.8.1.9]
802	COE1_sp002358575	COE1_sp002358575	K02614	3098	NODE_14_length_153927_cov_29_889811	None	acyl-CoA thioesterase [EC:3.1.2.-]
803	COE1_sp002358575	COE1_sp002358575	K02614	2147	NODE_12_length_162894_cov_27_263954	None	acyl-CoA thioesterase [EC:3.1.2.-]
804	COE1_sp002358575	COE1_sp002358575	K00016	2148	NODE_12_length_162894_cov_27_263954	None	L-lactate dehydrogenase [EC:1.1.1.27]
805	COE1_sp002358575	COE1_sp002358575	K00604	2111	NODE_12_length_162894_cov_27_263954	None	methionyl-tRNA formyltransferase [EC:2.1.2.9]
806	COE1_sp002358575	COE1_sp002358575	K19157	2064	NODE_12_length_162894_cov_27_263954	None	mRNA interferase YafQ [EC:3.1.-.-]
807	COE1_sp002358575	COE1_sp002358575	K19157	2089	NODE_12_length_162894_cov_27_263954	None	mRNA interferase YafQ [EC:3.1.-.-]
808	COE1_sp002358575	COE1_sp002358575	K20074	17464	NODE_3_length_245677_cov_33_343463	None	PPM family protein phosphatase [EC:3.1.3.16]
809	COE1_sp002358575	COE1_sp002358575	K20074	2115	NODE_12_length_162894_cov_27_263954	None	PPM family protein phosphatase [EC:3.1.3.16]
810	COE1_sp002358575	COE1_sp002358575	K20074	4318	NODE_19_length_114258_cov_32_274616	None	PPM family protein phosphatase [EC:3.1.3.16]
811	COE1_sp002358575	COE1_sp002358575	K23352	2222	NODE_12_length_162894_cov_27_263954	None	glutaconyl-CoA/methylmalonyl-CoA decarboxylase subunit delta
812	COE1_sp002358575	COE1_sp002358575	K01534	2164	NODE_12_length_162894_cov_27_263954	None	Zn2+/Cd2+-exporting ATPase [EC:7.2.2.12 7.2.2.21]
813	COE1_sp002358575	COE1_sp002358575	K02406	7592	NODE_24_length_84148_cov_32_163034	None	flagellin
814	COE1_sp002358575	COE1_sp002358575	K02406	7593	NODE_24_length_84148_cov_32_163034	None	flagellin
815	COE1_sp002358575	COE1_sp002358575	K02406	19018	NODE_6_length_217817_cov_47_846323	None	flagellin
816	COE1_sp002358575	COE1_sp002358575	K02406	7595	NODE_24_length_84148_cov_32_163034	None	flagellin
817	COE1_sp002358575	COE1_sp002358575	K02406	12848	NODE_39_length_45945_cov_35_193702	None	flagellin
818	COE1_sp002358575	COE1_sp002358575	K02406	7602	NODE_24_length_84148_cov_32_163034	None	flagellin
819	COE1_sp002358575	COE1_sp002358575	K02406	2141	NODE_12_length_162894_cov_27_263954	None	flagellin
820	COE1_sp002358575	COE1_sp002358575	K02406	7605	NODE_24_length_84148_cov_32_163034	None	flagellin
821	COE1_sp002358575	COE1_sp002358575	K02406	7604	NODE_24_length_84148_cov_32_163034	None	flagellin
822	COE1_sp002358575	COE1_sp002358575	K02406	16893	NODE_2_length_254332_cov_28_949484	None	flagellin
823	COE1_sp002358575	COE1_sp002358575	K01872	2206	NODE_12_length_162894_cov_27_263954	None	alanyl-tRNA synthetase [EC:6.1.1.7]
824	COE1_sp002358575	COE1_sp002358575	K07727	3106	NODE_14_length_153927_cov_29_889811	None	putative transcriptional regulator
825	COE1_sp002358575	COE1_sp002358575	K07727	10499	NODE_32_length_57058_cov_26_586952	None	putative transcriptional regulator
826	COE1_sp002358575	COE1_sp002358575	K07727	2596	NODE_13_length_156099_cov_29_167568	None	putative transcriptional regulator
827	COE1_sp002358575	COE1_sp002358575	K07727	17989	NODE_65_length_19489_cov_27_308017	None	putative transcriptional regulator
828	COE1_sp002358575	COE1_sp002358575	K07727	20138	NODE_8_length_170500_cov_36_861334	None	putative transcriptional regulator
829	COE1_sp002358575	COE1_sp002358575	K07727	5292	NODE_21_length_104165_cov_45_301162	None	putative transcriptional regulator
830	COE1_sp002358575	COE1_sp002358575	K07727	2062	NODE_12_length_162894_cov_27_263954	None	putative transcriptional regulator
831	COE1_sp002358575	COE1_sp002358575	K07727	16174	NODE_1_length_310843_cov_41_188463	None	putative transcriptional regulator
832	COE1_sp002358575	COE1_sp002358575	K07727	1680	NODE_90_length_14861_cov_42_000405	None	putative transcriptional regulator
833	COE1_sp002358575	COE1_sp002358575	K07727	16209	NODE_1_length_310843_cov_41_188463	None	putative transcriptional regulator
834	COE1_sp002358575	COE1_sp002358575	K07727	16409	NODE_1_length_310843_cov_41_188463	None	putative transcriptional regulator
835	COE1_sp002358575	COE1_sp002358575	K07727	18458	NODE_5_length_232515_cov_36_962832	None	putative transcriptional regulator
836	COE1_sp002358575	COE1_sp002358575	K07727	19486	NODE_7_length_184084_cov_31_685512	None	putative transcriptional regulator
837	COE1_sp002358575	COE1_sp002358575	K01815	2136	NODE_12_length_162894_cov_27_263954	None	4-deoxy-L-threo-5-hexosulose-uronate ketol-isomerase [EC:5.3.1.17]
838	COE1_sp002358575	COE1_sp002358575	K06941	2114	NODE_12_length_162894_cov_27_263954	None	23S rRNA (adenine2503-C2)-methyltransferase [EC:2.1.1.192]
839	COE1_sp002358575	COE1_sp002358575	K07334	2083	NODE_12_length_162894_cov_27_263954	None	toxin HigB-1
840	COE1_sp002358575	COE1_sp002358575	K03595	2202	NODE_12_length_162894_cov_27_263954	None	GTPase
841	COE1_sp002358575	COE1_sp002358575	K07718	18401	NODE_5_length_232515_cov_36_962832	None	two-component system, sensor histidine kinase YesM [EC:2.7.13.3]
842	COE1_sp002358575	COE1_sp002358575	K07718	2214	NODE_12_length_162894_cov_27_263954	None	two-component system, sensor histidine kinase YesM [EC:2.7.13.3]
843	COE1_sp002358575	COE1_sp002358575	K07718	14025	NODE_42_length_44558_cov_29_045278	None	two-component system, sensor histidine kinase YesM [EC:2.7.13.3]
844	COE1_sp002358575	COE1_sp002358575	K07718	11564	NODE_34_length_54257_cov_30_003671	None	two-component system, sensor histidine kinase YesM [EC:2.7.13.3]
845	COE1_sp002358575	COE1_sp002358575	K07718	15537	NODE_51_length_28521_cov_59_741762	None	two-component system, sensor histidine kinase YesM [EC:2.7.13.3]
846	COE1_sp002358575	COE1_sp002358575	K01208	20132	NODE_8_length_170500_cov_36_861334	None	cyclomaltodextrinase / maltogenic alpha-amylase / neopullulanase [EC:3.2.1.54 3.2.1.133 3.2.1.135]
847	COE1_sp002358575	COE1_sp002358575	K01208	2188	NODE_12_length_162894_cov_27_263954	None	cyclomaltodextrinase / maltogenic alpha-amylase / neopullulanase [EC:3.2.1.54 3.2.1.133 3.2.1.135]
848	COE1_sp002358575	COE1_sp002358575	K10117	2192	NODE_12_length_162894_cov_27_263954	None	raffinose/stachyose/melibiose transport system substrate-binding protein
849	COE1_sp002358575	COE1_sp002358575	K10117	6922	NODE_23_length_87707_cov_31_767250	None	raffinose/stachyose/melibiose transport system substrate-binding protein
850	COE1_sp002358575	COE1_sp002358575	K10117	9355	NODE_30_length_61880_cov_33_616013	None	raffinose/stachyose/melibiose transport system substrate-binding protein
851	COE1_sp002358575	COE1_sp002358575	K10117	15533	NODE_51_length_28521_cov_59_741762	None	raffinose/stachyose/melibiose transport system substrate-binding protein
852	COE1_sp002358575	COE1_sp002358575	K03584	2203	NODE_12_length_162894_cov_27_263954	None	DNA repair protein RecO (recombination protein O)
853	COE1_sp002358575	COE1_sp002358575	K04758	9331	NODE_30_length_61880_cov_33_616013	None	ferrous iron transport protein A
854	COE1_sp002358575	COE1_sp002358575	K04758	2149	NODE_12_length_162894_cov_27_263954	None	ferrous iron transport protein A
855	COE1_sp002358575	COE1_sp002358575	K04758	2150	NODE_12_length_162894_cov_27_263954	None	ferrous iron transport protein A
856	COE1_sp002358575	COE1_sp002358575	K04759	9331	NODE_30_length_61880_cov_33_616013	None	ferrous iron transport protein B
857	COE1_sp002358575	COE1_sp002358575	K04759	2151	NODE_12_length_162894_cov_27_263954	None	ferrous iron transport protein B
858	COE1_sp002358575	COE1_sp002358575	K21903	2160	NODE_12_length_162894_cov_27_263954	None	ArsR family transcriptional regulator, lead/cadmium/zinc/bismuth-responsive transcriptional repressor
859	COE1_sp002358575	COE1_sp002358575	K07079	16403	NODE_1_length_310843_cov_41_188463	None	uncharacterized protein
860	COE1_sp002358575	COE1_sp002358575	K07079	18954	NODE_6_length_217817_cov_47_846323	None	uncharacterized protein
861	COE1_sp002358575	COE1_sp002358575	K07079	2187	NODE_12_length_162894_cov_27_263954	None	uncharacterized protein
862	COE1_sp002358575	COE1_sp002358575	K14415	6107	NODE_22_length_91632_cov_44_239219	None	tRNA-splicing ligase RtcB (3'-phosphate/5'-hydroxy nucleic acid ligase) [EC:6.5.1.8]
863	COE1_sp002358575	COE1_sp002358575	K14415	2181	NODE_12_length_162894_cov_27_263954	None	tRNA-splicing ligase RtcB (3'-phosphate/5'-hydroxy nucleic acid ligase) [EC:6.5.1.8]
864	COE1_sp002358575	COE1_sp002358575	K14415	3030	NODE_14_length_153927_cov_29_889811	None	tRNA-splicing ligase RtcB (3'-phosphate/5'-hydroxy nucleic acid ligase) [EC:6.5.1.8]
865	COE1_sp002358575	COE1_sp002358575	K18829	1098	NODE_10_length_168523_cov_33_488116	None	antitoxin VapB
866	COE1_sp002358575	COE1_sp002358575	K07707	1185	NODE_10_length_168523_cov_33_488116	None	two-component system, LytTR family, response regulator AgrA
867	COE1_sp002358575	COE1_sp002358575	K18828	1099	NODE_10_length_168523_cov_33_488116	None	tRNA(fMet)-specific endonuclease VapC [EC:3.1.-.-]
868	COE1_sp002358575	COE1_sp002358575	K02279	1048	NODE_10_length_168523_cov_33_488116	None	pilus assembly protein CpaB
869	COE1_sp002358575	COE1_sp002358575	K02279	18291	NODE_5_length_232515_cov_36_962832	None	pilus assembly protein CpaB
870	COE1_sp002358575	COE1_sp002358575	K02337	1170	NODE_10_length_168523_cov_33_488116	None	DNA polymerase III subunit alpha [EC:2.7.7.7]
871	COE1_sp002358575	COE1_sp002358575	K02337	18439	NODE_5_length_232515_cov_36_962832	None	DNA polymerase III subunit alpha [EC:2.7.7.7]
872	COE1_sp002358575	COE1_sp002358575	K03111	20205	NODE_74_length_16881_cov_27_219066	None	single-strand DNA-binding protein
873	COE1_sp002358575	COE1_sp002358575	K03111	1077	NODE_10_length_168523_cov_33_488116	None	single-strand DNA-binding protein
874	COE1_sp002358575	COE1_sp002358575	K03111	4286	NODE_19_length_114258_cov_32_274616	None	single-strand DNA-binding protein
875	COE1_sp002358575	COE1_sp002358575	K19978	1034	NODE_10_length_168523_cov_33_488116	None	acarbose 7IV-phosphotransferase [EC:2.7.1.187]
876	COE1_sp002358575	COE1_sp002358575	K19978	14335	NODE_43_length_44318_cov_30_840544	None	acarbose 7IV-phosphotransferase [EC:2.7.1.187]
877	COE1_sp002358575	COE1_sp002358575	K02343	1171	NODE_10_length_168523_cov_33_488116	None	DNA polymerase III subunit gamma/tau [EC:2.7.7.7]
878	COE1_sp002358575	COE1_sp002358575	K02343	12846	NODE_39_length_45945_cov_35_193702	None	DNA polymerase III subunit gamma/tau [EC:2.7.7.7]
879	COE1_sp002358575	COE1_sp002358575	K06871	1187	NODE_10_length_168523_cov_33_488116	None	uncharacterized protein
880	COE1_sp002358575	COE1_sp002358575	K06871	19046	NODE_6_length_217817_cov_47_846323	None	uncharacterized protein
881	COE1_sp002358575	COE1_sp002358575	K06871	17991	NODE_65_length_19489_cov_27_308017	None	uncharacterized protein
882	COE1_sp002358575	COE1_sp002358575	K06871	8840	NODE_29_length_66002_cov_45_489469	None	uncharacterized protein
883	COE1_sp002358575	COE1_sp002358575	K06871	1065	NODE_10_length_168523_cov_33_488116	None	uncharacterized protein
884	COE1_sp002358575	COE1_sp002358575	K06871	11050	NODE_33_length_56764_cov_56_217302	None	uncharacterized protein
885	COE1_sp002358575	COE1_sp002358575	K06871	6124	NODE_22_length_91632_cov_44_239219	None	uncharacterized protein
886	COE1_sp002358575	COE1_sp002358575	K06871	12017	NODE_36_length_52946_cov_27_366357	None	uncharacterized protein
887	COE1_sp002358575	COE1_sp002358575	K06871	1108	NODE_10_length_168523_cov_33_488116	None	uncharacterized protein
888	COE1_sp002358575	COE1_sp002358575	K06871	18330	NODE_5_length_232515_cov_36_962832	None	uncharacterized protein
889	COE1_sp002358575	COE1_sp002358575	K06871	18427	NODE_5_length_232515_cov_36_962832	None	uncharacterized protein
890	COE1_sp002358575	COE1_sp002358575	K06871	17277	NODE_3_length_245677_cov_33_343463	None	uncharacterized protein
891	COE1_sp002358575	COE1_sp002358575	K03704	11984	NODE_36_length_52946_cov_27_366357	None	cold shock protein
892	COE1_sp002358575	COE1_sp002358575	K03704	1057	NODE_10_length_168523_cov_33_488116	None	cold shock protein
893	COE1_sp002358575	COE1_sp002358575	K03704	20199	NODE_74_length_16881_cov_27_219066	None	cold shock protein
894	COE1_sp002358575	COE1_sp002358575	K02340	14357	NODE_43_length_44318_cov_30_840544	None	DNA polymerase III subunit delta [EC:2.7.7.7]
895	COE1_sp002358575	COE1_sp002358575	K02340	1022	NODE_10_length_168523_cov_33_488116	None	DNA polymerase III subunit delta [EC:2.7.7.7]
896	COE1_sp002358575	COE1_sp002358575	K07800	1114	NODE_10_length_168523_cov_33_488116	None	AgrD protein
897	COE1_sp002358575	COE1_sp002358575	K07800	12877	NODE_39_length_45945_cov_35_193702	None	AgrD protein
898	COE1_sp002358575	COE1_sp002358575	K07800	1061	NODE_10_length_168523_cov_33_488116	None	AgrD protein
899	COE1_sp002358575	COE1_sp002358575	K07800	18342	NODE_5_length_232515_cov_36_962832	None	AgrD protein
900	COE1_sp002358575	COE1_sp002358575	K23356	1033	NODE_10_length_168523_cov_33_488116	None	HTH-type transcriptional regulator, sugar sensing transcriptional regulator
901	COE1_sp002358575	COE1_sp002358575	K23356	17329	NODE_3_length_245677_cov_33_343463	None	HTH-type transcriptional regulator, sugar sensing transcriptional regulator
902	COE1_sp002358575	COE1_sp002358575	K02004	17985	NODE_65_length_19489_cov_27_308017	None	putative ABC transport system permease protein
903	COE1_sp002358575	COE1_sp002358575	K02004	19042	NODE_6_length_217817_cov_47_846323	None	putative ABC transport system permease protein
904	COE1_sp002358575	COE1_sp002358575	K02004	18915	NODE_6_length_217817_cov_47_846323	None	putative ABC transport system permease protein
905	COE1_sp002358575	COE1_sp002358575	K02004	17352	NODE_3_length_245677_cov_33_343463	None	putative ABC transport system permease protein
906	COE1_sp002358575	COE1_sp002358575	K02004	17993	NODE_65_length_19489_cov_27_308017	None	putative ABC transport system permease protein
907	COE1_sp002358575	COE1_sp002358575	K02004	8841	NODE_29_length_66002_cov_45_489469	None	putative ABC transport system permease protein
908	COE1_sp002358575	COE1_sp002358575	K02004	4652	NODE_20_length_104815_cov_34_771325	None	putative ABC transport system permease protein
909	COE1_sp002358575	COE1_sp002358575	K02004	16940	NODE_2_length_254332_cov_28_949484	None	putative ABC transport system permease protein
910	COE1_sp002358575	COE1_sp002358575	K02004	20172	NODE_8_length_170500_cov_36_861334	None	putative ABC transport system permease protein
911	COE1_sp002358575	COE1_sp002358575	K02004	2687	NODE_13_length_156099_cov_29_167568	None	putative ABC transport system permease protein
912	COE1_sp002358575	COE1_sp002358575	K02004	20079	NODE_8_length_170500_cov_36_861334	None	putative ABC transport system permease protein
913	COE1_sp002358575	COE1_sp002358575	K02004	1106	NODE_10_length_168523_cov_33_488116	None	putative ABC transport system permease protein
914	COE1_sp002358575	COE1_sp002358575	K02004	16375	NODE_1_length_310843_cov_41_188463	None	putative ABC transport system permease protein
915	COE1_sp002358575	COE1_sp002358575	K02004	6167	NODE_22_length_91632_cov_44_239219	None	putative ABC transport system permease protein
916	COE1_sp002358575	COE1_sp002358575	K02004	18936	NODE_6_length_217817_cov_47_846323	None	putative ABC transport system permease protein
917	COE1_sp002358575	COE1_sp002358575	K02004	3135	NODE_14_length_153927_cov_29_889811	None	putative ABC transport system permease protein
918	COE1_sp002358575	COE1_sp002358575	K06940	1091	NODE_10_length_168523_cov_33_488116	None	uncharacterized protein
919	COE1_sp002358575	COE1_sp002358575	K04763	13999	NODE_42_length_44558_cov_29_045278	None	integrase/recombinase XerD
920	COE1_sp002358575	COE1_sp002358575	K04763	16927	NODE_2_length_254332_cov_28_949484	None	integrase/recombinase XerD
921	COE1_sp002358575	COE1_sp002358575	K04763	1111	NODE_10_length_168523_cov_33_488116	None	integrase/recombinase XerD
922	COE1_sp002358575	COE1_sp002358575	K15256	1120	NODE_10_length_168523_cov_33_488116	None	tRNA (cmo5U34)-methyltransferase [EC:2.1.1.-]
923	COE1_sp002358575	COE1_sp002358575	K02338	9912	NODE_31_length_58868_cov_53_529152	None	DNA polymerase III subunit beta [EC:2.7.7.7]
924	COE1_sp002358575	COE1_sp002358575	K02338	1163	NODE_10_length_168523_cov_33_488116	None	DNA polymerase III subunit beta [EC:2.7.7.7]
925	COE1_sp002358575	COE1_sp002358575	K07133	1079	NODE_10_length_168523_cov_33_488116	None	uncharacterized protein
926	COE1_sp002358575	COE1_sp002358575	K06223	18283	NODE_5_length_232515_cov_36_962832	None	DNA adenine methylase [EC:2.1.1.72]
927	COE1_sp002358575	COE1_sp002358575	K06223	1548	NODE_11_length_165420_cov_36_304478	None	DNA adenine methylase [EC:2.1.1.72]
928	COE1_sp002358575	COE1_sp002358575	K06223	14804	NODE_44_length_44096_cov_28_960650	None	DNA adenine methylase [EC:2.1.1.72]
929	COE1_sp002358575	COE1_sp002358575	K06223	5338	NODE_21_length_104165_cov_45_301162	None	DNA adenine methylase [EC:2.1.1.72]
930	COE1_sp002358575	COE1_sp002358575	K06223	4351	NODE_19_length_114258_cov_32_274616	None	DNA adenine methylase [EC:2.1.1.72]
931	COE1_sp002358575	COE1_sp002358575	K06385	14823	NODE_44_length_44096_cov_28_960650	None	stage II sporulation protein P
932	COE1_sp002358575	COE1_sp002358575	K03671	14824	NODE_44_length_44096_cov_28_960650	None	thioredoxin 1
933	COE1_sp002358575	COE1_sp002358575	K01726	14813	NODE_44_length_44096_cov_28_960650	None	gamma-carbonic anhydrase [EC:4.2.1.-]
934	COE1_sp002358575	COE1_sp002358575	K04070	14818	NODE_44_length_44096_cov_28_960650	None	putative pyruvate formate lyase activating enzyme [EC:1.97.1.4]
935	COE1_sp002358575	COE1_sp002358575	K07025	14819	NODE_44_length_44096_cov_28_960650	None	putative hydrolase of the HAD superfamily
936	COE1_sp002358575	COE1_sp002358575	K02968	14821	NODE_44_length_44096_cov_28_960650	None	small subunit ribosomal protein S20
937	COE1_sp002358575	COE1_sp002358575	K06012	14822	NODE_44_length_44096_cov_28_960650	None	spore protease [EC:3.4.24.78]
938	COE1_sp002358575	COE1_sp002358575	K06384	14000	NODE_42_length_44558_cov_29_045278	None	stage II sporulation protein M
939	COE1_sp002358575	COE1_sp002358575	K03565	14003	NODE_42_length_44558_cov_29_045278	None	regulatory protein
940	COE1_sp002358575	COE1_sp002358575	K09777	14008	NODE_42_length_44558_cov_29_045278	None	uncharacterized protein
941	COE1_sp002358575	COE1_sp002358575	K14441	14006	NODE_42_length_44558_cov_29_045278	None	ribosomal protein S12 methylthiotransferase [EC:2.8.4.4]
942	COE1_sp002358575	COE1_sp002358575	K03060	14007	NODE_42_length_44558_cov_29_045278	None	DNA-directed RNA polymerase subunit omega [EC:2.7.7.6]
943	COE1_sp002358575	COE1_sp002358575	K01515	14001	NODE_42_length_44558_cov_29_045278	None	ADP-ribose pyrophosphatase [EC:3.6.1.13]
944	COE1_sp002358575	COE1_sp002358575	K01515	17378	NODE_3_length_245677_cov_33_343463	None	ADP-ribose pyrophosphatase [EC:3.6.1.13]
945	COE1_sp002358575	COE1_sp002358575	K18682	14002	NODE_42_length_44558_cov_29_045278	None	ribonucrease Y [EC:3.1.-.-]
946	COE1_sp002358575	COE1_sp002358575	K00995	14005	NODE_42_length_44558_cov_29_045278	None	CDP-diacylglycerol---glycerol-3-phosphate 3-phosphatidyltransferase [EC:2.7.8.5]
947	COE1_sp002358575	COE1_sp002358575	K00566	13996	NODE_42_length_44558_cov_29_045278	None	tRNA-uridine 2-sulfurtransferase [EC:2.8.1.13]
948	COE1_sp002358575	COE1_sp002358575	K01308	3571	NODE_15_length_152018_cov_30_070583	None	g-D-glutamyl-meso-diaminopimelate peptidase [EC:3.4.19.11]
949	COE1_sp002358575	COE1_sp002358575	K01308	13990	NODE_42_length_44558_cov_29_045278	None	g-D-glutamyl-meso-diaminopimelate peptidase [EC:3.4.19.11]
950	COE1_sp002358575	COE1_sp002358575	K03553	14004	NODE_42_length_44558_cov_29_045278	None	recombination protein RecA
951	COE1_sp002358575	COE1_sp002358575	K07483	14016	NODE_42_length_44558_cov_29_045278	None	transposase
952	COE1_sp002358575	COE1_sp002358575	K07483	14018	NODE_42_length_44558_cov_29_045278	None	transposase
953	COE1_sp002358575	COE1_sp002358575	K07483	18965	NODE_6_length_217817_cov_47_846323	None	transposase
954	COE1_sp002358575	COE1_sp002358575	K07483	15545	NODE_51_length_28521_cov_59_741762	None	transposase
955	COE1_sp002358575	COE1_sp002358575	K07483	18941	NODE_6_length_217817_cov_47_846323	None	transposase
956	COE1_sp002358575	COE1_sp002358575	K15921	16362	NODE_1_length_310843_cov_41_188463	None	arabinoxylan arabinofuranohydrolase [EC:3.2.1.55]
957	COE1_sp002358575	COE1_sp002358575	K02050	16435	NODE_1_length_310843_cov_41_188463	None	NitT/TauT family transport system permease protein
958	COE1_sp002358575	COE1_sp002358575	K02050	16988	NODE_2_length_254332_cov_28_949484	None	NitT/TauT family transport system permease protein
959	COE1_sp002358575	COE1_sp002358575	K01160	16280	NODE_1_length_310843_cov_41_188463	None	crossover junction endodeoxyribonuclease RusA [EC:3.1.22.4]
960	COE1_sp002358575	COE1_sp002358575	K02086	16394	NODE_1_length_310843_cov_41_188463	None	DNA replication protein
961	COE1_sp002358575	COE1_sp002358575	K11991	16486	NODE_53_length_25696_cov_32_287274	None	tRNA(adenine34) deaminase [EC:3.5.4.33]
962	COE1_sp002358575	COE1_sp002358575	K04769	16411	NODE_1_length_310843_cov_41_188463	None	AbrB family transcriptional regulator, stage V sporulation protein T
963	COE1_sp002358575	COE1_sp002358575	K11358	16452	NODE_1_length_310843_cov_41_188463	None	aspartate aminotransferase [EC:2.6.1.1]
964	COE1_sp002358575	COE1_sp002358575	K10907	16494	NODE_53_length_25696_cov_32_287274	None	aminotransferase [EC:2.6.1.-]
965	COE1_sp002358575	COE1_sp002358575	K09117	16427	NODE_1_length_310843_cov_41_188463	None	uncharacterized protein
966	COE1_sp002358575	COE1_sp002358575	K00537	16238	NODE_1_length_310843_cov_41_188463	None	arsenate reductase (glutaredoxin) [EC:1.20.4.1]
967	COE1_sp002358575	COE1_sp002358575	K06153	16454	NODE_1_length_310843_cov_41_188463	None	undecaprenyl-diphosphatase [EC:3.6.1.27]
968	COE1_sp002358575	COE1_sp002358575	K21471	1152	NODE_10_length_168523_cov_33_488116	None	peptidoglycan DL-endopeptidase CwlO [EC:3.4.-.-]
969	COE1_sp002358575	COE1_sp002358575	K21471	5353	NODE_21_length_104165_cov_45_301162	None	peptidoglycan DL-endopeptidase CwlO [EC:3.4.-.-]
970	COE1_sp002358575	COE1_sp002358575	K21471	16450	NODE_1_length_310843_cov_41_188463	None	peptidoglycan DL-endopeptidase CwlO [EC:3.4.-.-]
971	COE1_sp002358575	COE1_sp002358575	K21471	17293	NODE_3_length_245677_cov_33_343463	None	peptidoglycan DL-endopeptidase CwlO [EC:3.4.-.-]
972	COE1_sp002358575	COE1_sp002358575	K03216	16495	NODE_53_length_25696_cov_32_287274	None	tRNA (cytidine/uridine-2'-O-)-methyltransferase [EC:2.1.1.207]
973	COE1_sp002358575	COE1_sp002358575	K03310	16206	NODE_1_length_310843_cov_41_188463	None	alanine or glycine:cation symporter, AGCS family
974	COE1_sp002358575	COE1_sp002358575	K06283	16451	NODE_1_length_310843_cov_41_188463	None	putative DeoR family transcriptional regulator, stage III sporulation protein D
975	COE1_sp002358575	COE1_sp002358575	K03924	16465	NODE_1_length_310843_cov_41_188463	None	MoxR-like ATPase [EC:3.6.3.-]
976	COE1_sp002358575	COE1_sp002358575	K03924	11555	NODE_34_length_54257_cov_30_003671	None	MoxR-like ATPase [EC:3.6.3.-]
977	COE1_sp002358575	COE1_sp002358575	K09951	16488	NODE_53_length_25696_cov_32_287274	None	CRISPR-associated protein Cas2
978	COE1_sp002358575	COE1_sp002358575	K09951	11996	NODE_36_length_52946_cov_27_366357	None	CRISPR-associated protein Cas2
979	COE1_sp002358575	COE1_sp002358575	K07149	16416	NODE_1_length_310843_cov_41_188463	None	uncharacterized protein
980	COE1_sp002358575	COE1_sp002358575	K07149	2589	NODE_13_length_156099_cov_29_167568	None	uncharacterized protein
981	COE1_sp002358575	COE1_sp002358575	K03101	16352	NODE_1_length_310843_cov_41_188463	None	signal peptidase II [EC:3.4.23.36]
982	COE1_sp002358575	COE1_sp002358575	K03101	3012	NODE_14_length_153927_cov_29_889811	None	signal peptidase II [EC:3.4.23.36]
983	COE1_sp002358575	COE1_sp002358575	K23398	16283	NODE_1_length_310843_cov_41_188463	None	activating signal cointegrator 1
984	COE1_sp002358575	COE1_sp002358575	K02342	16488	NODE_53_length_25696_cov_32_287274	None	DNA polymerase III subunit epsilon [EC:2.7.7.7]
985	COE1_sp002358575	COE1_sp002358575	K02342	11996	NODE_36_length_52946_cov_27_366357	None	DNA polymerase III subunit epsilon [EC:2.7.7.7]
986	COE1_sp002358575	COE1_sp002358575	K00757	16229	NODE_1_length_310843_cov_41_188463	None	uridine phosphorylase [EC:2.4.2.3]
987	COE1_sp002358575	COE1_sp002358575	K01924	16395	NODE_1_length_310843_cov_41_188463	None	UDP-N-acetylmuramate--alanine ligase [EC:6.3.2.8]
988	COE1_sp002358575	COE1_sp002358575	K05349	4706	NODE_20_length_104815_cov_34_771325	None	beta-glucosidase [EC:3.2.1.21]
989	COE1_sp002358575	COE1_sp002358575	K05349	17956	NODE_4_length_244402_cov_28_435774	None	beta-glucosidase [EC:3.2.1.21]
990	COE1_sp002358575	COE1_sp002358575	K05349	20134	NODE_8_length_170500_cov_36_861334	None	beta-glucosidase [EC:3.2.1.21]
991	COE1_sp002358575	COE1_sp002358575	K05349	19048	NODE_6_length_217817_cov_47_846323	None	beta-glucosidase [EC:3.2.1.21]
992	COE1_sp002358575	COE1_sp002358575	K05349	16363	NODE_1_length_310843_cov_41_188463	None	beta-glucosidase [EC:3.2.1.21]
993	COE1_sp002358575	COE1_sp002358575	K05349	4368	NODE_19_length_114258_cov_32_274616	None	beta-glucosidase [EC:3.2.1.21]
994	COE1_sp002358575	COE1_sp002358575	K05349	3539	NODE_15_length_152018_cov_30_070583	None	beta-glucosidase [EC:3.2.1.21]
995	COE1_sp002358575	COE1_sp002358575	K05349	4729	NODE_20_length_104815_cov_34_771325	None	beta-glucosidase [EC:3.2.1.21]
996	COE1_sp002358575	COE1_sp002358575	K19167	16471	NODE_53_length_25696_cov_32_287274	None	protein AbiQ
997	COE1_sp002358575	COE1_sp002358575	K23779	16421	NODE_1_length_310843_cov_41_188463	None	XRE family transcriptional regulator, regulator of sulfur utilization
998	COE1_sp002358575	COE1_sp002358575	K03324	16349	NODE_1_length_310843_cov_41_188463	None	phosphate:Na+ symporter
999	COE1_sp002358575	COE1_sp002358575	K03324	3567	NODE_15_length_152018_cov_30_070583	None	phosphate:Na+ symporter
1000	COE1_sp002358575	COE1_sp002358575	K10761	16426	NODE_1_length_310843_cov_41_188463	None	tRNA(His) guanylyltransferase [EC:2.7.7.79]
1001	COE1_sp002358575	COE1_sp002358575	K01056	16401	NODE_1_length_310843_cov_41_188463	None	peptidyl-tRNA hydrolase, PTH1 family [EC:3.1.1.29]
1002	COE1_sp002358575	COE1_sp002358575	K07814	16184	NODE_1_length_310843_cov_41_188463	None	putative two-component system response regulator
1003	COE1_sp002358575	COE1_sp002358575	K07814	3966	NODE_17_length_124411_cov_36_225466	None	putative two-component system response regulator
1004	COE1_sp002358575	COE1_sp002358575	K05795	16248	NODE_1_length_310843_cov_41_188463	None	tellurium resistance protein TerD
1005	COE1_sp002358575	COE1_sp002358575	K05795	16249	NODE_1_length_310843_cov_41_188463	None	tellurium resistance protein TerD
1006	COE1_sp002358575	COE1_sp002358575	K05795	16253	NODE_1_length_310843_cov_41_188463	None	tellurium resistance protein TerD
1007	COE1_sp002358575	COE1_sp002358575	K05795	16247	NODE_1_length_310843_cov_41_188463	None	tellurium resistance protein TerD
1008	COE1_sp002358575	COE1_sp002358575	K07035	16447	NODE_1_length_310843_cov_41_188463	None	uncharacterized protein
1009	COE1_sp002358575	COE1_sp002358575	K03723	16402	NODE_1_length_310843_cov_41_188463	None	transcription-repair coupling factor (superfamily II helicase) [EC:3.6.4.-]
1010	COE1_sp002358575	COE1_sp002358575	K09145	16180	NODE_1_length_310843_cov_41_188463	None	uncharacterized protein
1011	COE1_sp002358575	COE1_sp002358575	K09145	9901	NODE_31_length_58868_cov_53_529152	None	uncharacterized protein
1012	COE1_sp002358575	COE1_sp002358575	K23237	4353	NODE_19_length_114258_cov_32_274616	None	AraC family transcriptional regulator, melibiose operon regulatory protein
1013	COE1_sp002358575	COE1_sp002358575	K23237	16378	NODE_1_length_310843_cov_41_188463	None	AraC family transcriptional regulator, melibiose operon regulatory protein
1014	COE1_sp002358575	COE1_sp002358575	K23237	20131	NODE_8_length_170500_cov_36_861334	None	AraC family transcriptional regulator, melibiose operon regulatory protein
1015	COE1_sp002358575	COE1_sp002358575	K23237	14365	NODE_43_length_44318_cov_30_840544	None	AraC family transcriptional regulator, melibiose operon regulatory protein
1016	COE1_sp002358575	COE1_sp002358575	K11068	16417	NODE_1_length_310843_cov_41_188463	None	hemolysin III
1017	COE1_sp002358575	COE1_sp002358575	K01118	16473	NODE_53_length_25696_cov_32_287274	None	FMN-dependent NADH-azoreductase [EC:1.7.1.17]
1018	COE1_sp002358575	COE1_sp002358575	K09803	20155	NODE_8_length_170500_cov_36_861334	None	uncharacterized protein
1019	COE1_sp002358575	COE1_sp002358575	K09803	16333	NODE_1_length_310843_cov_41_188463	None	uncharacterized protein
1020	COE1_sp002358575	COE1_sp002358575	K02003	17984	NODE_65_length_19489_cov_27_308017	None	putative ABC transport system ATP-binding protein
1021	COE1_sp002358575	COE1_sp002358575	K02003	19041	NODE_6_length_217817_cov_47_846323	None	putative ABC transport system ATP-binding protein
1022	COE1_sp002358575	COE1_sp002358575	K02003	18914	NODE_6_length_217817_cov_47_846323	None	putative ABC transport system ATP-binding protein
1023	COE1_sp002358575	COE1_sp002358575	K02003	17350	NODE_3_length_245677_cov_33_343463	None	putative ABC transport system ATP-binding protein
1024	COE1_sp002358575	COE1_sp002358575	K02003	17992	NODE_65_length_19489_cov_27_308017	None	putative ABC transport system ATP-binding protein
1025	COE1_sp002358575	COE1_sp002358575	K02003	8842	NODE_29_length_66002_cov_45_489469	None	putative ABC transport system ATP-binding protein
1026	COE1_sp002358575	COE1_sp002358575	K02003	20171	NODE_8_length_170500_cov_36_861334	None	putative ABC transport system ATP-binding protein
1027	COE1_sp002358575	COE1_sp002358575	K02003	16939	NODE_2_length_254332_cov_28_949484	None	putative ABC transport system ATP-binding protein
1028	COE1_sp002358575	COE1_sp002358575	K02003	20078	NODE_8_length_170500_cov_36_861334	None	putative ABC transport system ATP-binding protein
1029	COE1_sp002358575	COE1_sp002358575	K02003	1107	NODE_10_length_168523_cov_33_488116	None	putative ABC transport system ATP-binding protein
1030	COE1_sp002358575	COE1_sp002358575	K02003	11028	NODE_33_length_56764_cov_56_217302	None	putative ABC transport system ATP-binding protein
1031	COE1_sp002358575	COE1_sp002358575	K02003	6165	NODE_22_length_91632_cov_44_239219	None	putative ABC transport system ATP-binding protein
1032	COE1_sp002358575	COE1_sp002358575	K02003	18935	NODE_6_length_217817_cov_47_846323	None	putative ABC transport system ATP-binding protein
1033	COE1_sp002358575	COE1_sp002358575	K02003	16377	NODE_1_length_310843_cov_41_188463	None	putative ABC transport system ATP-binding protein
1034	COE1_sp002358575	COE1_sp002358575	K06113	16464	NODE_1_length_310843_cov_41_188463	None	arabinan endo-1,5-alpha-L-arabinosidase [EC:3.2.1.99]
1035	COE1_sp002358575	COE1_sp002358575	K06113	16438	NODE_1_length_310843_cov_41_188463	None	arabinan endo-1,5-alpha-L-arabinosidase [EC:3.2.1.99]
1036	COE1_sp002358575	COE1_sp002358575	K06113	3527	NODE_15_length_152018_cov_30_070583	None	arabinan endo-1,5-alpha-L-arabinosidase [EC:3.2.1.99]
1037	COE1_sp002358575	COE1_sp002358575	K00262	16350	NODE_1_length_310843_cov_41_188463	None	glutamate dehydrogenase (NADP+) [EC:1.4.1.4]
1038	COE1_sp002358575	COE1_sp002358575	K01182	16380	NODE_1_length_310843_cov_41_188463	None	oligo-1,6-glucosidase [EC:3.2.1.10]
1039	COE1_sp002358575	COE1_sp002358575	K14982	16371	NODE_1_length_310843_cov_41_188463	None	two-component system, OmpR family, sensor histidine kinase CiaH [EC:2.7.13.3]
1040	COE1_sp002358575	COE1_sp002358575	K14982	16990	NODE_2_length_254332_cov_28_949484	None	two-component system, OmpR family, sensor histidine kinase CiaH [EC:2.7.13.3]
1041	COE1_sp002358575	COE1_sp002358575	K23684	16214	NODE_1_length_310843_cov_41_188463	None	dolichol-phosphate hexosyltransferase [EC:2.4.1.-]
1042	COE1_sp002358575	COE1_sp002358575	K23684	16487	NODE_53_length_25696_cov_32_287274	None	dolichol-phosphate hexosyltransferase [EC:2.4.1.-]
1043	COE1_sp002358575	COE1_sp002358575	K02099	3080	NODE_14_length_153927_cov_29_889811	None	AraC family transcriptional regulator, arabinose operon regulatory protein
1044	COE1_sp002358575	COE1_sp002358575	K02099	9364	NODE_30_length_61880_cov_33_616013	None	AraC family transcriptional regulator, arabinose operon regulatory protein
1045	COE1_sp002358575	COE1_sp002358575	K02099	16358	NODE_1_length_310843_cov_41_188463	None	AraC family transcriptional regulator, arabinose operon regulatory protein
1046	COE1_sp002358575	COE1_sp002358575	K02099	16415	NODE_1_length_310843_cov_41_188463	None	AraC family transcriptional regulator, arabinose operon regulatory protein
1047	COE1_sp002358575	COE1_sp002358575	K06412	18288	NODE_5_length_232515_cov_36_962832	None	stage V sporulation protein G
1048	COE1_sp002358575	COE1_sp002358575	K06412	16398	NODE_1_length_310843_cov_41_188463	None	stage V sporulation protein G
1049	COE1_sp002358575	COE1_sp002358575	K06412	11023	NODE_33_length_56764_cov_56_217302	None	stage V sporulation protein G
1050	COE1_sp002358575	COE1_sp002358575	K01619	16226	NODE_1_length_310843_cov_41_188463	None	deoxyribose-phosphate aldolase [EC:4.1.2.4]
1051	COE1_sp002358575	COE1_sp002358575	K01619	17794	NODE_4_length_244402_cov_28_435774	None	deoxyribose-phosphate aldolase [EC:4.1.2.4]
1052	COE1_sp002358575	COE1_sp002358575	K01181	16364	NODE_1_length_310843_cov_41_188463	None	endo-1,4-beta-xylanase [EC:3.2.1.8]
1053	COE1_sp002358575	COE1_sp002358575	K06407	16354	NODE_1_length_310843_cov_41_188463	None	stage V sporulation protein AE
1054	COE1_sp002358575	COE1_sp002358575	K01740	12859	NODE_39_length_45945_cov_35_193702	None	O-acetylhomoserine (thiol)-lyase [EC:2.5.1.49]
1055	COE1_sp002358575	COE1_sp002358575	K01740	16197	NODE_1_length_310843_cov_41_188463	None	O-acetylhomoserine (thiol)-lyase [EC:2.5.1.49]
1056	COE1_sp002358575	COE1_sp002358575	K01740	16998	NODE_2_length_254332_cov_28_949484	None	O-acetylhomoserine (thiol)-lyase [EC:2.5.1.49]
1057	COE1_sp002358575	COE1_sp002358575	K00847	16768	NODE_2_length_254332_cov_28_949484	None	fructokinase [EC:2.7.1.4]
1058	COE1_sp002358575	COE1_sp002358575	K00847	16195	NODE_1_length_310843_cov_41_188463	None	fructokinase [EC:2.7.1.4]
1059	COE1_sp002358575	COE1_sp002358575	K00847	16783	NODE_2_length_254332_cov_28_949484	None	fructokinase [EC:2.7.1.4]
1060	COE1_sp002358575	COE1_sp002358575	K07090	16235	NODE_1_length_310843_cov_41_188463	None	uncharacterized protein
1061	COE1_sp002358575	COE1_sp002358575	K02315	16393	NODE_1_length_310843_cov_41_188463	None	DNA replication protein DnaC
1062	COE1_sp002358575	COE1_sp002358575	K02315	16171	NODE_1_length_310843_cov_41_188463	None	DNA replication protein DnaC
1063	COE1_sp002358575	COE1_sp002358575	K02315	1694	NODE_90_length_14861_cov_42_000405	None	DNA replication protein DnaC
1064	COE1_sp002358575	COE1_sp002358575	K02116	16185	NODE_1_length_310843_cov_41_188463	None	ATP synthase protein I
1065	COE1_sp002358575	COE1_sp002358575	K00926	16353	NODE_1_length_310843_cov_41_188463	None	carbamate kinase [EC:2.7.2.2]
1066	COE1_sp002358575	COE1_sp002358575	K04565	16389	NODE_1_length_310843_cov_41_188463	None	superoxide dismutase, Cu-Zn family [EC:1.15.1.1]
1067	COE1_sp002358575	COE1_sp002358575	K01187	16380	NODE_1_length_310843_cov_41_188463	None	alpha-glucosidase [EC:3.2.1.20]
1068	COE1_sp002358575	COE1_sp002358575	K01187	16429	NODE_1_length_310843_cov_41_188463	None	alpha-glucosidase [EC:3.2.1.20]
1069	COE1_sp002358575	COE1_sp002358575	K01839	16227	NODE_1_length_310843_cov_41_188463	None	phosphopentomutase [EC:5.4.2.7]
1070	COE1_sp002358575	COE1_sp002358575	K03545	16449	NODE_1_length_310843_cov_41_188463	None	trigger factor
1071	COE1_sp002358575	COE1_sp002358575	K03545	3964	NODE_17_length_124411_cov_36_225466	None	trigger factor
1072	COE1_sp002358575	COE1_sp002358575	K03545	16477	NODE_53_length_25696_cov_32_287274	None	trigger factor
1073	COE1_sp002358575	COE1_sp002358575	K06213	16410	NODE_1_length_310843_cov_41_188463	None	magnesium transporter
1074	COE1_sp002358575	COE1_sp002358575	K07455	16273	NODE_1_length_310843_cov_41_188463	None	recombination protein RecT
1075	COE1_sp002358575	COE1_sp002358575	K07699	9341	NODE_30_length_61880_cov_33_616013	None	two-component system, response regulator, stage 0 sporulation protein A
1076	COE1_sp002358575	COE1_sp002358575	K07699	1574	NODE_11_length_165420_cov_36_304478	None	two-component system, response regulator, stage 0 sporulation protein A
1077	COE1_sp002358575	COE1_sp002358575	K15897	1596	NODE_11_length_165420_cov_36_304478	None	UDP-2,4-diacetamido-2,4,6-trideoxy-beta-L-altropyranose hydrolase [EC:3.6.1.57]
[truncated: 8,517 more rows]

## Sheet: overall-metabolism_enriched
KEGG_MODULE	enrichment_score	unadjusted_p_value	adjusted_q_value	associated_groups	accession	sample_ids	p_control	N_control	p_treatment	N_treatment
C1-unit interconversion, prokaryotes	3.9375	0.0472209	0.422327	control	M00140	COE1_sp002358575,COE1_sp009774375,Clostridia	0.75	4	0	3
Leucine biosynthesis, 2-oxoisovalerate => 2-oxoisocaproate	3.9375	0.0472209	0.422327	control	M00432	COE1_sp002358575,COE1_sp009774375,Clostridia	0.75	4	0	3
Histidine degradation, histidine => N-formiminoglutamate => glutamate	3.9375	0.0472209	0.422327	treatment	M00045	Alistipes_sp009774895,Lawsonibacter,UBA7173_sp001689485,UBA7173_sp002491305	0.25	4	1	3
KDO2-lipid A biosynthesis, Raetz pathway, LpxL-LpxM type	3.73337	0.0533355	0.422327	treatment	M00060	Alistipes_sp009774895,UBA7173_sp001689485	0	4	0.666667	3
Fatty acid biosynthesis, initiation	2.1	0.147299	0.422327	control	M00082	COE1_sp002358575,COE1_sp009774375	0.5	4	0	3
Multidrug resistance, efflux pump MepA	2.1	0.147299	0.422327	control	M00705	COE1_sp002358575,COE1_sp009774375	0.5	4	0	3
Tryptophan biosynthesis, chorismate => tryptophan	2.1	0.147299	0.422327	control	M00023	COE1_sp002358575,COE1_sp009774375	0.5	4	0	3
Vancomycin resistance, D-Ala-D-Ser type	2.1	0.147299	0.422327	control	M00652	COE1_sp002358575,COE1_sp009774375	0.5	4	0	3
beta-Oxidation, acyl-CoA synthesis	1.55564	0.212304	0.422327	control	M00086	Alistipes_sp009774895,COE1_sp002358575,COE1_sp009774375,Clostridia,UBA7173_sp001689485,UBA7173_sp002491305	1	4	0.666667	3
dTDP-L-rhamnose biosynthesis	1.55564	0.212304	0.422327	control	M00793	Alistipes_sp009774895,COE1_sp002358575,COE1_sp009774375,Clostridia,UBA7173_sp001689485,UBA7173_sp002491305	1	4	0.666667	3
F-type ATPase, prokaryotes and chloroplasts	1.55564	0.212304	0.422327	control	M00157	COE1_sp002358575,COE1_sp009774375,Clostridia,Lawsonibacter,UBA7173_sp001689485,UBA7173_sp002491305	1	4	0.666667	3
Fatty acid biosynthesis, elongation	1.55564	0.212304	0.422327	control	M00083	Alistipes_sp009774895,COE1_sp002358575,COE1_sp009774375,Clostridia,UBA7173_sp001689485,UBA7173_sp002491305	1	4	0.666667	3
Glycogen degradation, glycogen => glucose-6P	1.55564	0.212304	0.422327	control	M00855	COE1_sp002358575,COE1_sp009774375,Clostridia,Lawsonibacter,UBA7173_sp001689485,UBA7173_sp002491305	1	4	0.666667	3
Lysine biosynthesis, DAP aminotransferase pathway, aspartate => lysine	1.55564	0.212304	0.422327	control	M00527	COE1_sp002358575,COE1_sp009774375,Clostridia,Lawsonibacter,UBA7173_sp001689485,UBA7173_sp002491305	1	4	0.666667	3
Lipoic acid biosynthesis, eukaryotes, octanoyl-ACP => dihydrolipoyl-H	1.55564	0.212304	0.422327	treatment	M00882	Alistipes_sp009774895	0	4	0.333333	3
Lipoic acid biosynthesis, plants and bacteria, octanoyl-ACP => dihydrolipoyl-E2/H	1.55564	0.212304	0.422327	treatment	M00881	Alistipes_sp009774895	0	4	0.333333	3
Menaquinone biosynthesis, futalosine pathway	1.55564	0.212304	0.422327	treatment	M00930	Alistipes_sp009774895	0	4	0.333333	3
Menaquinone biosynthesis, modified futalosine pathway	1.55564	0.212304	0.422327	treatment	M00931	Alistipes_sp009774895	0	4	0.333333	3
Methionine degradation	1.55564	0.212304	0.422327	treatment	M00035	Lawsonibacter	0	4	0.333333	3
NADH:quinone oxidoreductase, prokaryotes	1.55564	0.212304	0.422327	treatment	M00144	UBA7173_sp001689485	0	4	0.333333	3
Pimeloyl-ACP biosynthesis, BioC-BioH pathway, malonyl-ACP => pimeloyl-ACP	1.55564	0.212304	0.422327	treatment	M00572	UBA7173_sp001689485	0	4	0.333333	3
Pyrimidine ribonucleotide biosynthesis, UMP => UDP/UTP,CDP/CTP	1.55564	0.212304	0.422327	treatment	M00052	UBA7173_sp001689485	0	4	0.333333	3
Reductive pentose phosphate cycle, glyceraldehyde-3P => ribulose-5P	1.55564	0.212304	0.422327	treatment	M00167	Alistipes_sp009774895	0	4	0.333333	3
Riboflavin biosynthesis, plants and bacteria, GTP => riboflavin/FMN/FAD	1.55564	0.212304	0.422327	treatment	M00125	UBA7173_sp001689485	0	4	0.333333	3
Thiamine salvage pathway, HMP/HET => TMP	1.55564	0.212304	0.422327	treatment	M00899	Lawsonibacter	0	4	0.333333	3
V/A-type ATPase, prokaryotes	1.55564	0.212304	0.422327	treatment	M00159	Lawsonibacter	0	4	0.333333	3
Citrate cycle, second carbon oxidation, 2-oxoglutarate => oxaloacetate	1.21528	0.270289	0.422327	treatment	M00011	Alistipes_sp009774895,UBA7173_sp001689485,UBA7173_sp002491305	0.25	4	0.666667	3
CMP-KDO biosynthesis	1.21528	0.270289	0.422327	treatment	M00063	Alistipes_sp009774895,UBA7173_sp001689485,UBA7173_sp002491305	0.25	4	0.666667	3
Galactose degradation, Leloir pathway, galactose => alpha-D-glucose-1P	1.21528	0.270289	0.422327	treatment	M00632	Alistipes_sp009774895,Clostridia,UBA7173_sp001689485	0.25	4	0.666667	3
KDO2-lipid A biosynthesis, Raetz pathway, non-LpxL-LpxM type	1.21528	0.270289	0.422327	treatment	M00866	Alistipes_sp009774895,UBA7173_sp001689485,UBA7173_sp002491305	0.25	4	0.666667	3
Pantothenate biosynthesis, valine/L-aspartate => pantothenate	1.21528	0.270289	0.422327	treatment	M00119	Alistipes_sp009774895,UBA7173_sp001689485,UBA7173_sp002491305	0.25	4	0.666667	3
Phosphatidylethanolamine (PE) biosynthesis, PA => PS => PE	1.21528	0.270289	0.422327	treatment	M00093	Alistipes_sp009774895,UBA7173_sp001689485,UBA7173_sp002491305	0.25	4	0.666667	3
Propanoyl-CoA metabolism, propanoyl-CoA => succinyl-CoA	1.21528	0.270289	0.422327	treatment	M00741	Alistipes_sp009774895,UBA7173_sp001689485,UBA7173_sp002491305	0.25	4	0.666667	3
Succinate dehydrogenase, prokaryotes	1.21528	0.270289	0.422327	treatment	M00149	Alistipes_sp009774895,UBA7173_sp001689485,UBA7173_sp002491305	0.25	4	0.666667	3
Arginine biosynthesis, ornithine => arginine	1.21528	0.270289	0.422327	control	M00844	COE1_sp002358575,COE1_sp009774375,Clostridia,Lawsonibacter	0.75	4	0.333333	3
Cysteine biosynthesis, serine => cysteine	1.21528	0.270289	0.422327	control	M00021	COE1_sp002358575,COE1_sp009774375,Clostridia,Lawsonibacter	0.75	4	0.333333	3
D-Glucuronate degradation, D-glucuronate => pyruvate + D-glyceraldehyde 3P	1.21528	0.270289	0.422327	control	M00061	COE1_sp002358575,COE1_sp009774375,Clostridia,Lawsonibacter	0.75	4	0.333333	3
Glycogen biosynthesis, glucose-1P => glycogen/starch	1.21528	0.270289	0.422327	control	M00854	COE1_sp002358575,COE1_sp009774375,Clostridia,Lawsonibacter	0.75	4	0.333333	3
Histidine biosynthesis, PRPP => histidine	1.21528	0.270289	0.422327	control	M00026	COE1_sp002358575,COE1_sp009774375,Clostridia,Lawsonibacter	0.75	4	0.333333	3
Isoleucine biosynthesis, threonine => 2-oxobutanoate => isoleucine	1.21528	0.270289	0.422327	control	M00570	COE1_sp002358575,COE1_sp009774375,Clostridia,Lawsonibacter	0.75	4	0.333333	3
Lysine biosynthesis, DAP dehydrogenase pathway, aspartate => lysine	1.21528	0.270289	0.422327	control	M00526	COE1_sp002358575,COE1_sp009774375,Clostridia,Lawsonibacter	0.75	4	0.333333	3
Lysine biosynthesis, succinyl-DAP pathway, aspartate => lysine	1.21528	0.270289	0.422327	control	M00016	COE1_sp002358575,COE1_sp009774375,Clostridia,Lawsonibacter	0.75	4	0.333333	3
Ornithine biosynthesis, glutamate => ornithine	1.21528	0.270289	0.422327	control	M00028	COE1_sp002358575,COE1_sp009774375,Clostridia,Lawsonibacter	0.75	4	0.333333	3
Proline biosynthesis, glutamate => proline	1.21528	0.270289	0.422327	control	M00015	COE1_sp002358575,COE1_sp009774375,Clostridia,Lawsonibacter	0.75	4	0.333333	3
Semi-phosphorylative Entner-Doudoroff pathway, gluconate => glycerate-3P	1.21528	0.270289	0.422327	control	M00308	COE1_sp002358575,COE1_sp009774375,Clostridia,Lawsonibacter	0.75	4	0.333333	3
Threonine biosynthesis, aspartate => homoserine => threonine	1.21528	0.270289	0.422327	control	M00018	COE1_sp002358575,COE1_sp009774375,Clostridia,Lawsonibacter	0.75	4	0.333333	3
UDP-N-acetyl-D-glucosamine biosynthesis, prokaryotes, glucose => UDP-GlcNAc	1.21528	0.270289	0.422327	control	M00909	COE1_sp002358575,COE1_sp009774375,Clostridia,Lawsonibacter	0.75	4	0.333333	3
Valine/isoleucine biosynthesis, pyruvate => valine / 2-oxobutanoate => isoleucine	1.21528	0.270289	0.422327	control	M00019	COE1_sp002358575,COE1_sp009774375,Clostridia,Lawsonibacter	0.75	4	0.333333	3
Acylglycerol degradation	0.875011	0.349572	0.459963	control	M00098	Clostridia	0.25	4	0	3
ADP-L-glycero-D-manno-heptose biosynthesis	0.875011	0.349572	0.459963	control	M00064	COE1_sp002358575	0.25	4	0	3
CAM (Crassulacean acid metabolism), light	0.875011	0.349572	0.459963	control	M00169	UBA7173_sp002491305	0.25	4	0	3
Pentose phosphate pathway (Pentose phosphate cycle)	0.875011	0.349572	0.459963	control	M00004	COE1_sp009774375	0.25	4	0	3
Phosphate acetyltransferase-acetate kinase pathway, acetyl-CoA => acetate	0.875011	0.349572	0.459963	control	M00579	COE1_sp002358575	0.25	4	0	3
Polyamine biosynthesis, arginine => agmatine => putrescine => spermidine	0.875011	0.349572	0.459963	control	M00133	COE1_sp009774375	0.25	4	0	3
Adenine ribonucleotide biosynthesis, IMP => ADP,ATP	0.875011	0.349572	0.459963	treatment	M00049	Alistipes_sp009774895,COE1_sp002358575,COE1_sp009774375,Clostridia,Lawsonibacter,UBA7173_sp001689485	0.75	4	1	3
Pyruvate oxidation, pyruvate => acetyl-CoA	0.875011	0.349572	0.459963	treatment	M00307	Alistipes_sp009774895,COE1_sp002358575,COE1_sp009774375,Lawsonibacter,UBA7173_sp001689485,UBA7173_sp002491305	0.75	4	1	3
Serine biosynthesis, glycerate-3P => serine	0.875011	0.349572	0.459963	treatment	M00020	Alistipes_sp009774895,COE1_sp002358575,COE1_sp009774375,Lawsonibacter,UBA7173_sp001689485,UBA7173_sp002491305	0.75	4	1	3
D-Galacturonate degradation (bacteria), D-galacturonate => pyruvate + D-glyceraldehyde 3P	0.194444	0.659243	0.838021	control	M00631	COE1_sp002358575,COE1_sp009774375,Lawsonibacter	0.5	4	0.333333	3
Tetrahydrofolate biosynthesis, GTP => THF	0.194444	0.659243	0.838021	treatment	M00126	Alistipes_sp009774895,Clostridia,UBA7173_sp001689485,UBA7173_sp002491305	0.5	4	0.666667	3
NAD biosynthesis, aspartate => quinolinate => NAD	0.0583341	0.809149	0.948221	control	M00115	Alistipes_sp009774895,COE1_sp002358575,COE1_sp009774375,UBA7173_sp001689485,UBA7173_sp002491305	0.75	4	0.666667	3
beta-Lactam resistance, Bla system	0.0583341	0.809149	0.948221	treatment	M00627	UBA7173_sp001689485,UBA7173_sp002491305	0.25	4	0.333333	3
Biotin biosynthesis, BioW pathway, pimelate => pimeloyl-CoA => biotin	0.0583341	0.809149	0.948221	treatment	M00577	UBA7173_sp001689485,UBA7173_sp002491305	0.25	4	0.333333	3
Biotin biosynthesis, pimeloyl-ACP/CoA => biotin	0.0583341	0.809149	0.948221	treatment	M00123	UBA7173_sp001689485,UBA7173_sp002491305	0.25	4	0.333333	3
Methionine biosynthesis, apartate => homoserine => methionine	0.0583341	0.809149	0.948221	treatment	M00017	Clostridia,Lawsonibacter	0.25	4	0.333333	3
C5 isoprenoid biosynthesis, non-mevalonate pathway	2.71226e-41	1	1	NA	M00096	Alistipes_sp009774895,COE1_sp002358575,COE1_sp009774375,Clostridia,Lawsonibacter,UBA7173_sp001689485,UBA7173_sp002491305	1	4	1	3
Coenzyme A biosynthesis, pantothenate => CoA	2.71226e-41	1	1	NA	M00120	Alistipes_sp009774895,COE1_sp002358575,COE1_sp009774375,Clostridia,Lawsonibacter,UBA7173_sp001689485,UBA7173_sp002491305	1	4	1	3
Gluconeogenesis, oxaloacetate => fructose-6P	2.71226e-41	1	1	NA	M00003	Alistipes_sp009774895,COE1_sp002358575,COE1_sp009774375,Clostridia,Lawsonibacter,UBA7173_sp001689485,UBA7173_sp002491305	1	4	1	3
Glycolysis (Embden-Meyerhof pathway), glucose => pyruvate	2.71226e-41	1	1	NA	M00001	Alistipes_sp009774895,COE1_sp002358575,COE1_sp009774375,Clostridia,Lawsonibacter,UBA7173_sp001689485,UBA7173_sp002491305	1	4	1	3
Glycolysis, core module involving three-carbon compounds	2.71226e-41	1	1	NA	M00002	Alistipes_sp009774895,COE1_sp002358575,COE1_sp009774375,Clostridia,Lawsonibacter,UBA7173_sp001689485,UBA7173_sp002491305	1	4	1	3
Guanine ribonucleotide biosynthesis IMP => GDP,GTP	2.71226e-41	1	1	NA	M00050	Alistipes_sp009774895,COE1_sp002358575,COE1_sp009774375,Clostridia,Lawsonibacter,UBA7173_sp001689485,UBA7173_sp002491305	1	4	1	3
Inosine monophosphate biosynthesis, PRPP + glutamine => IMP	2.71226e-41	1	1	NA	M00048	Alistipes_sp009774895,COE1_sp002358575,COE1_sp009774375,Clostridia,Lawsonibacter,UBA7173_sp001689485,UBA7173_sp002491305	1	4	1	3
Pentose phosphate pathway, non-oxidative phase, fructose 6P => ribose 5P	2.71226e-41	1	1	NA	M00007	Alistipes_sp009774895,COE1_sp002358575,COE1_sp009774375,Clostridia,Lawsonibacter,UBA7173_sp001689485,UBA7173_sp002491305	1	4	1	3
PRPP biosynthesis, ribose 5P => PRPP	2.71226e-41	1	1	NA	M00005	Alistipes_sp009774895,COE1_sp002358575,COE1_sp009774375,Clostridia,Lawsonibacter,UBA7173_sp001689485,UBA7173_sp002491305	1	4	1	3
Shikimate pathway, phosphoenolpyruvate + erythrose-4P => chorismate	2.71226e-41	1	1	NA	M00022	Alistipes_sp009774895,COE1_sp002358575,COE1_sp009774375,Clostridia,Lawsonibacter,UBA7173_sp001689485,UBA7173_sp002491305	1	4	1	3
Uridine monophosphate biosynthesis, glutamine (+ PRPP) => UMP	2.71226e-41	1	1	NA	M00051	Alistipes_sp009774895,COE1_sp002358575,COE1_sp009774375,Clostridia,Lawsonibacter,UBA7173_sp001689485,UBA7173_sp002491305	1	4	1	3

## Sheet: Alistipes_sp009774895-enriched
KEGG_MODULE	enrichment_score	unadjusted_p_value	adjusted_q_value	associated_groups	accession	sample_ids	p_control	N_control	p_test	N_test
F-type ATPase, prokaryotes and chloroplasts	7.00002	0.00815089	0.0764146	control	M00157	COE1_sp002358575,COE1_sp009774375,Clostridia,Lawsonibacter,UBA7173_sp001689485,UBA7173_sp002491305	1	6	0	1
Glycogen degradation, glycogen => glucose-6P	7.00002	0.00815089	0.0764146	control	M00855	COE1_sp002358575,COE1_sp009774375,Clostridia,Lawsonibacter,UBA7173_sp001689485,UBA7173_sp002491305	1	6	0	1
Lysine biosynthesis, DAP aminotransferase pathway, aspartate => lysine	7.00002	0.00815089	0.0764146	control	M00527	COE1_sp002358575,COE1_sp009774375,Clostridia,Lawsonibacter,UBA7173_sp001689485,UBA7173_sp002491305	1	6	0	1
Lipoic acid biosynthesis, eukaryotes, octanoyl-ACP => dihydrolipoyl-H	7.00002	0.00815089	0.0764146	test	M00882	Alistipes_sp009774895	0	6	1	1
Lipoic acid biosynthesis, plants and bacteria, octanoyl-ACP => dihydrolipoyl-E2/H	7.00002	0.00815089	0.0764146	test	M00881	Alistipes_sp009774895	0	6	1	1
Menaquinone biosynthesis, futalosine pathway	7.00002	0.00815089	0.0764146	test	M00930	Alistipes_sp009774895	0	6	1	1
Menaquinone biosynthesis, modified futalosine pathway	7.00002	0.00815089	0.0764146	test	M00931	Alistipes_sp009774895	0	6	1	1
Reductive pentose phosphate cycle, glyceraldehyde-3P => ribulose-5P	7.00002	0.00815089	0.0764146	test	M00167	Alistipes_sp009774895	0	6	1	1
KDO2-lipid A biosynthesis, Raetz pathway, LpxL-LpxM type	2.91667	0.0876688	0.513665	test	M00060	Alistipes_sp009774895,UBA7173_sp001689485	0.166667	6	1	1
Arginine biosynthesis, ornithine => arginine	1.55557	0.212315	0.513665	control	M00844	COE1_sp002358575,COE1_sp009774375,Clostridia,Lawsonibacter	0.666667	6	0	1
Cysteine biosynthesis, serine => cysteine	1.55557	0.212315	0.513665	control	M00021	COE1_sp002358575,COE1_sp009774375,Clostridia,Lawsonibacter	0.666667	6	0	1
D-Glucuronate degradation, D-glucuronate => pyruvate + D-glyceraldehyde 3P	1.55557	0.212315	0.513665	control	M00061	COE1_sp002358575,COE1_sp009774375,Clostridia,Lawsonibacter	0.666667	6	0	1
Glycogen biosynthesis, glucose-1P => glycogen/starch	1.55557	0.212315	0.513665	control	M00854	COE1_sp002358575,COE1_sp009774375,Clostridia,Lawsonibacter	0.666667	6	0	1
Histidine biosynthesis, PRPP => histidine	1.55557	0.212315	0.513665	control	M00026	COE1_sp002358575,COE1_sp009774375,Clostridia,Lawsonibacter	0.666667	6	0	1
Isoleucine biosynthesis, threonine => 2-oxobutanoate => isoleucine	1.55557	0.212315	0.513665	control	M00570	COE1_sp002358575,COE1_sp009774375,Clostridia,Lawsonibacter	0.666667	6	0	1
Lysine biosynthesis, DAP dehydrogenase pathway, aspartate => lysine	1.55557	0.212315	0.513665	control	M00526	COE1_sp002358575,COE1_sp009774375,Clostridia,Lawsonibacter	0.666667	6	0	1
Lysine biosynthesis, succinyl-DAP pathway, aspartate => lysine	1.55557	0.212315	0.513665	control	M00016	COE1_sp002358575,COE1_sp009774375,Clostridia,Lawsonibacter	0.666667	6	0	1
Ornithine biosynthesis, glutamate => ornithine	1.55557	0.212315	0.513665	control	M00028	COE1_sp002358575,COE1_sp009774375,Clostridia,Lawsonibacter	0.666667	6	0	1
Proline biosynthesis, glutamate => proline	1.55557	0.212315	0.513665	control	M00015	COE1_sp002358575,COE1_sp009774375,Clostridia,Lawsonibacter	0.666667	6	0	1
Semi-phosphorylative Entner-Doudoroff pathway, gluconate => glycerate-3P	1.55557	0.212315	0.513665	control	M00308	COE1_sp002358575,COE1_sp009774375,Clostridia,Lawsonibacter	0.666667	6	0	1
Threonine biosynthesis, aspartate => homoserine => threonine	1.55557	0.212315	0.513665	control	M00018	COE1_sp002358575,COE1_sp009774375,Clostridia,Lawsonibacter	0.666667	6	0	1
UDP-N-acetyl-D-glucosamine biosynthesis, prokaryotes, glucose => UDP-GlcNAc	1.55557	0.212315	0.513665	control	M00909	COE1_sp002358575,COE1_sp009774375,Clostridia,Lawsonibacter	0.666667	6	0	1
Valine/isoleucine biosynthesis, pyruvate => valine / 2-oxobutanoate => isoleucine	1.55557	0.212315	0.513665	control	M00019	COE1_sp002358575,COE1_sp009774375,Clostridia,Lawsonibacter	0.666667	6	0	1
Citrate cycle, second carbon oxidation, 2-oxoglutarate => oxaloacetate	1.55557	0.212315	0.513665	test	M00011	Alistipes_sp009774895,UBA7173_sp001689485,UBA7173_sp002491305	0.333333	6	1	1
CMP-KDO biosynthesis	1.55557	0.212315	0.513665	test	M00063	Alistipes_sp009774895,UBA7173_sp001689485,UBA7173_sp002491305	0.333333	6	1	1
Galactose degradation, Leloir pathway, galactose => alpha-D-glucose-1P	1.55557	0.212315	0.513665	test	M00632	Alistipes_sp009774895,Clostridia,UBA7173_sp001689485	0.333333	6	1	1
KDO2-lipid A biosynthesis, Raetz pathway, non-LpxL-LpxM type	1.55557	0.212315	0.513665	test	M00866	Alistipes_sp009774895,UBA7173_sp001689485,UBA7173_sp002491305	0.333333	6	1	1
Pantothenate biosynthesis, valine/L-aspartate => pantothenate	1.55557	0.212315	0.513665	test	M00119	Alistipes_sp009774895,UBA7173_sp001689485,UBA7173_sp002491305	0.333333	6	1	1
Phosphatidylethanolamine (PE) biosynthesis, PA => PS => PE	1.55557	0.212315	0.513665	test	M00093	Alistipes_sp009774895,UBA7173_sp001689485,UBA7173_sp002491305	0.333333	6	1	1
Propanoyl-CoA metabolism, propanoyl-CoA => succinyl-CoA	1.55557	0.212315	0.513665	test	M00741	Alistipes_sp009774895,UBA7173_sp001689485,UBA7173_sp002491305	0.333333	6	1	1
Succinate dehydrogenase, prokaryotes	1.55557	0.212315	0.513665	test	M00149	Alistipes_sp009774895,UBA7173_sp001689485,UBA7173_sp002491305	0.333333	6	1	1
C1-unit interconversion, prokaryotes	0.875003	0.349574	0.728279	control	M00140	COE1_sp002358575,COE1_sp009774375,Clostridia	0.5	6	0	1
D-Galacturonate degradation (bacteria), D-galacturonate => pyruvate + D-glyceraldehyde 3P	0.875003	0.349574	0.728279	control	M00631	COE1_sp002358575,COE1_sp009774375,Lawsonibacter	0.5	6	0	1
Histidine degradation, histidine => N-formiminoglutamate => glutamate	0.875003	0.349574	0.728279	test	M00045	Alistipes_sp009774895,Lawsonibacter,UBA7173_sp001689485,UBA7173_sp002491305	0.5	6	1	1
Leucine biosynthesis, 2-oxoisovalerate => 2-oxoisocaproate	0.875003	0.349574	0.728279	control	M00432	COE1_sp002358575,COE1_sp009774375,Clostridia	0.5	6	0	1
Tetrahydrofolate biosynthesis, GTP => THF	0.875003	0.349574	0.728279	test	M00126	Alistipes_sp009774895,Clostridia,UBA7173_sp001689485,UBA7173_sp002491305	0.5	6	1	1
NAD biosynthesis, aspartate => quinolinate => NAD	0.466678	0.494519	0.77255	test	M00115	Alistipes_sp009774895,COE1_sp002358575,COE1_sp009774375,UBA7173_sp001689485,UBA7173_sp002491305	0.666667	6	1	1
beta-Lactam resistance, Bla system	0.466678	0.494519	0.77255	control	M00627	UBA7173_sp001689485,UBA7173_sp002491305	0.333333	6	0	1
Biotin biosynthesis, BioW pathway, pimelate => pimeloyl-CoA => biotin	0.466678	0.494519	0.77255	control	M00577	UBA7173_sp001689485,UBA7173_sp002491305	0.333333	6	0	1
Biotin biosynthesis, pimeloyl-ACP/CoA => biotin	0.466678	0.494519	0.77255	control	M00123	UBA7173_sp001689485,UBA7173_sp002491305	0.333333	6	0	1
Fatty acid biosynthesis, initiation	0.466678	0.494519	0.77255	control	M00082	COE1_sp002358575,COE1_sp009774375	0.333333	6	0	1
Methionine biosynthesis, apartate => homoserine => methionine	0.466678	0.494519	0.77255	control	M00017	Clostridia,Lawsonibacter	0.333333	6	0	1
Multidrug resistance, efflux pump MepA	0.466678	0.494519	0.77255	control	M00705	COE1_sp002358575,COE1_sp009774375	0.333333	6	0	1
Tryptophan biosynthesis, chorismate => tryptophan	0.466678	0.494519	0.77255	control	M00023	COE1_sp002358575,COE1_sp009774375	0.333333	6	0	1
Vancomycin resistance, D-Ala-D-Ser type	0.466678	0.494519	0.77255	control	M00652	COE1_sp002358575,COE1_sp009774375	0.333333	6	0	1
Acylglycerol degradation	0.194445	0.659243	0.77255	control	M00098	Clostridia	0.166667	6	0	1
ADP-L-glycero-D-manno-heptose biosynthesis	0.194445	0.659243	0.77255	control	M00064	COE1_sp002358575	0.166667	6	0	1
CAM (Crassulacean acid metabolism), light	0.194445	0.659243	0.77255	control	M00169	UBA7173_sp002491305	0.166667	6	0	1
Methionine degradation	0.194445	0.659243	0.77255	control	M00035	Lawsonibacter	0.166667	6	0	1
NADH:quinone oxidoreductase, prokaryotes	0.194445	0.659243	0.77255	control	M00144	UBA7173_sp001689485	0.166667	6	0	1
Pentose phosphate pathway (Pentose phosphate cycle)	0.194445	0.659243	0.77255	control	M00004	COE1_sp009774375	0.166667	6	0	1
Phosphate acetyltransferase-acetate kinase pathway, acetyl-CoA => acetate	0.194445	0.659243	0.77255	control	M00579	COE1_sp002358575	0.166667	6	0	1
Pimeloyl-ACP biosynthesis, BioC-BioH pathway, malonyl-ACP => pimeloyl-ACP	0.194445	0.659243	0.77255	control	M00572	UBA7173_sp001689485	0.166667	6	0	1
Polyamine biosynthesis, arginine => agmatine => putrescine => spermidine	0.194445	0.659243	0.77255	control	M00133	COE1_sp009774375	0.166667	6	0	1
Pyrimidine ribonucleotide biosynthesis, UMP => UDP/UTP,CDP/CTP	0.194445	0.659243	0.77255	control	M00052	UBA7173_sp001689485	0.166667	6	0	1
Riboflavin biosynthesis, plants and bacteria, GTP => riboflavin/FMN/FAD	0.194445	0.659243	0.77255	control	M00125	UBA7173_sp001689485	0.166667	6	0	1
Thiamine salvage pathway, HMP/HET => TMP	0.194445	0.659243	0.77255	control	M00899	Lawsonibacter	0.166667	6	0	1
V/A-type ATPase, prokaryotes	0.194445	0.659243	0.77255	control	M00159	Lawsonibacter	0.166667	6	0	1
Adenine ribonucleotide biosynthesis, IMP => ADP,ATP	0.194445	0.659243	0.77255	test	M00049	Alistipes_sp009774895,COE1_sp002358575,COE1_sp009774375,Clostridia,Lawsonibacter,UBA7173_sp001689485	0.833333	6	1	1
beta-Oxidation, acyl-CoA synthesis	0.194445	0.659243	0.77255	test	M00086	Alistipes_sp009774895,COE1_sp002358575,COE1_sp009774375,Clostridia,UBA7173_sp001689485,UBA7173_sp002491305	0.833333	6	1	1
dTDP-L-rhamnose biosynthesis	0.194445	0.659243	0.77255	test	M00793	Alistipes_sp009774895,COE1_sp002358575,COE1_sp009774375,Clostridia,UBA7173_sp001689485,UBA7173_sp002491305	0.833333	6	1	1
Fatty acid biosynthesis, elongation	0.194445	0.659243	0.77255	test	M00083	Alistipes_sp009774895,COE1_sp002358575,COE1_sp009774375,Clostridia,UBA7173_sp001689485,UBA7173_sp002491305	0.833333	6	1	1
Pyruvate oxidation, pyruvate => acetyl-CoA	0.194445	0.659243	0.77255	test	M00307	Alistipes_sp009774895,COE1_sp002358575,COE1_sp009774375,Lawsonibacter,UBA7173_sp001689485,UBA7173_sp002491305	0.833333	6	1	1
Serine biosynthesis, glycerate-3P => serine	0.194445	0.659243	0.77255	test	M00020	Alistipes_sp009774895,COE1_sp002358575,COE1_sp009774375,Lawsonibacter,UBA7173_sp001689485,UBA7173_sp002491305	0.833333	6	1	1
C5 isoprenoid biosynthesis, non-mevalonate pathway	0	1	1	NA	M00096	Alistipes_sp009774895,COE1_sp002358575,COE1_sp009774375,Clostridia,Lawsonibacter,UBA7173_sp001689485,UBA7173_sp002491305	1	6	1	1
Coenzyme A biosynthesis, pantothenate => CoA	0	1	1	NA	M00120	Alistipes_sp009774895,COE1_sp002358575,COE1_sp009774375,Clostridia,Lawsonibacter,UBA7173_sp001689485,UBA7173_sp002491305	1	6	1	1
Gluconeogenesis, oxaloacetate => fructose-6P	0	1	1	NA	M00003	Alistipes_sp009774895,COE1_sp002358575,COE1_sp009774375,Clostridia,Lawsonibacter,UBA7173_sp001689485,UBA7173_sp002491305	1	6	1	1
Glycolysis (Embden-Meyerhof pathway), glucose => pyruvate	0	1	1	NA	M00001	Alistipes_sp009774895,COE1_sp002358575,COE1_sp009774375,Clostridia,Lawsonibacter,UBA7173_sp001689485,UBA7173_sp002491305	1	6	1	1
Glycolysis, core module involving three-carbon compounds	0	1	1	NA	M00002	Alistipes_sp009774895,COE1_sp002358575,COE1_sp009774375,Clostridia,Lawsonibacter,UBA7173_sp001689485,UBA7173_sp002491305	1	6	1	1
Guanine ribonucleotide biosynthesis IMP => GDP,GTP	0	1	1	NA	M00050	Alistipes_sp009774895,COE1_sp002358575,COE1_sp009774375,Clostridia,Lawsonibacter,UBA7173_sp001689485,UBA7173_sp002491305	1	6	1	1
Inosine monophosphate biosynthesis, PRPP + glutamine => IMP	0	1	1	NA	M00048	Alistipes_sp009774895,COE1_sp002358575,COE1_sp009774375,Clostridia,Lawsonibacter,UBA7173_sp001689485,UBA7173_sp002491305	1	6	1	1
Pentose phosphate pathway, non-oxidative phase, fructose 6P => ribose 5P	0	1	1	NA	M00007	Alistipes_sp009774895,COE1_sp002358575,COE1_sp009774375,Clostridia,Lawsonibacter,UBA7173_sp001689485,UBA7173_sp002491305	1	6	1	1
PRPP biosynthesis, ribose 5P => PRPP	0	1	1	NA	M00005	Alistipes_sp009774895,COE1_sp002358575,COE1_sp009774375,Clostridia,Lawsonibacter,UBA7173_sp001689485,UBA7173_sp002491305	1	6	1	1
Shikimate pathway, phosphoenolpyruvate + erythrose-4P => chorismate	0	1	1	NA	M00022	Alistipes_sp009774895,COE1_sp002358575,COE1_sp009774375,Clostridia,Lawsonibacter,UBA7173_sp001689485,UBA7173_sp002491305	1	6	1	1
Uridine monophosphate biosynthesis, glutamine (+ PRPP) => UMP	0	1	1	NA	M00051	Alistipes_sp009774895,COE1_sp002358575,COE1_sp009774375,Clostridia,Lawsonibacter,UBA7173_sp001689485,UBA7173_sp002491305	1	6	1	1

## Sheet: Clostridia-enriched
KEGG_MODULE	enrichment_score	unadjusted_p_value	adjusted_q_value	associated_groups	accession	sample_ids	p_control	N_control	p_test	N_test
Pyruvate oxidation, pyruvate => acetyl-CoA	7.00002	0.00815089	0.203772	control	M00307	Alistipes_sp009774895,COE1_sp002358575,COE1_sp009774375,Lawsonibacter,UBA7173_sp001689485,UBA7173_sp002491305	1	6	0	1
Serine biosynthesis, glycerate-3P => serine	7.00002	0.00815089	0.203772	control	M00020	Alistipes_sp009774895,COE1_sp002358575,COE1_sp009774375,Lawsonibacter,UBA7173_sp001689485,UBA7173_sp002491305	1	6	0	1
Acylglycerol degradation	7.00002	0.00815089	0.203772	test	M00098	Clostridia	0	6	1	1
Methionine biosynthesis, apartate => homoserine => methionine	2.91667	0.0876688	0.77255	test	M00017	Clostridia,Lawsonibacter	0.166667	6	1	1
NAD biosynthesis, aspartate => quinolinate => NAD	2.91667	0.0876688	0.77255	control	M00115	Alistipes_sp009774895,COE1_sp002358575,COE1_sp009774375,UBA7173_sp001689485,UBA7173_sp002491305	0.833333	6	0	1
Histidine degradation, histidine => N-formiminoglutamate => glutamate	1.55557	0.212315	0.77255	control	M00045	Alistipes_sp009774895,Lawsonibacter,UBA7173_sp001689485,UBA7173_sp002491305	0.666667	6	0	1
C1-unit interconversion, prokaryotes	1.55557	0.212315	0.77255	test	M00140	COE1_sp002358575,COE1_sp009774375,Clostridia	0.333333	6	1	1
Galactose degradation, Leloir pathway, galactose => alpha-D-glucose-1P	1.55557	0.212315	0.77255	test	M00632	Alistipes_sp009774895,Clostridia,UBA7173_sp001689485	0.333333	6	1	1
Leucine biosynthesis, 2-oxoisovalerate => 2-oxoisocaproate	1.55557	0.212315	0.77255	test	M00432	COE1_sp002358575,COE1_sp009774375,Clostridia	0.333333	6	1	1
Arginine biosynthesis, ornithine => arginine	0.875003	0.349574	0.77255	test	M00844	COE1_sp002358575,COE1_sp009774375,Clostridia,Lawsonibacter	0.5	6	1	1
Citrate cycle, second carbon oxidation, 2-oxoglutarate => oxaloacetate	0.875003	0.349574	0.77255	control	M00011	Alistipes_sp009774895,UBA7173_sp001689485,UBA7173_sp002491305	0.5	6	0	1
CMP-KDO biosynthesis	0.875003	0.349574	0.77255	control	M00063	Alistipes_sp009774895,UBA7173_sp001689485,UBA7173_sp002491305	0.5	6	0	1
Cysteine biosynthesis, serine => cysteine	0.875003	0.349574	0.77255	test	M00021	COE1_sp002358575,COE1_sp009774375,Clostridia,Lawsonibacter	0.5	6	1	1
D-Galacturonate degradation (bacteria), D-galacturonate => pyruvate + D-glyceraldehyde 3P	0.875003	0.349574	0.77255	control	M00631	COE1_sp002358575,COE1_sp009774375,Lawsonibacter	0.5	6	0	1
D-Glucuronate degradation, D-glucuronate => pyruvate + D-glyceraldehyde 3P	0.875003	0.349574	0.77255	test	M00061	COE1_sp002358575,COE1_sp009774375,Clostridia,Lawsonibacter	0.5	6	1	1
Glycogen biosynthesis, glucose-1P => glycogen/starch	0.875003	0.349574	0.77255	test	M00854	COE1_sp002358575,COE1_sp009774375,Clostridia,Lawsonibacter	0.5	6	1	1
Histidine biosynthesis, PRPP => histidine	0.875003	0.349574	0.77255	test	M00026	COE1_sp002358575,COE1_sp009774375,Clostridia,Lawsonibacter	0.5	6	1	1
Isoleucine biosynthesis, threonine => 2-oxobutanoate => isoleucine	0.875003	0.349574	0.77255	test	M00570	COE1_sp002358575,COE1_sp009774375,Clostridia,Lawsonibacter	0.5	6	1	1
KDO2-lipid A biosynthesis, Raetz pathway, non-LpxL-LpxM type	0.875003	0.349574	0.77255	control	M00866	Alistipes_sp009774895,UBA7173_sp001689485,UBA7173_sp002491305	0.5	6	0	1
Lysine biosynthesis, DAP dehydrogenase pathway, aspartate => lysine	0.875003	0.349574	0.77255	test	M00526	COE1_sp002358575,COE1_sp009774375,Clostridia,Lawsonibacter	0.5	6	1	1
Lysine biosynthesis, succinyl-DAP pathway, aspartate => lysine	0.875003	0.349574	0.77255	test	M00016	COE1_sp002358575,COE1_sp009774375,Clostridia,Lawsonibacter	0.5	6	1	1
Ornithine biosynthesis, glutamate => ornithine	0.875003	0.349574	0.77255	test	M00028	COE1_sp002358575,COE1_sp009774375,Clostridia,Lawsonibacter	0.5	6	1	1
Pantothenate biosynthesis, valine/L-aspartate => pantothenate	0.875003	0.349574	0.77255	control	M00119	Alistipes_sp009774895,UBA7173_sp001689485,UBA7173_sp002491305	0.5	6	0	1
Phosphatidylethanolamine (PE) biosynthesis, PA => PS => PE	0.875003	0.349574	0.77255	control	M00093	Alistipes_sp009774895,UBA7173_sp001689485,UBA7173_sp002491305	0.5	6	0	1
Proline biosynthesis, glutamate => proline	0.875003	0.349574	0.77255	test	M00015	COE1_sp002358575,COE1_sp009774375,Clostridia,Lawsonibacter	0.5	6	1	1
Propanoyl-CoA metabolism, propanoyl-CoA => succinyl-CoA	0.875003	0.349574	0.77255	control	M00741	Alistipes_sp009774895,UBA7173_sp001689485,UBA7173_sp002491305	0.5	6	0	1
Semi-phosphorylative Entner-Doudoroff pathway, gluconate => glycerate-3P	0.875003	0.349574	0.77255	test	M00308	COE1_sp002358575,COE1_sp009774375,Clostridia,Lawsonibacter	0.5	6	1	1
Succinate dehydrogenase, prokaryotes	0.875003	0.349574	0.77255	control	M00149	Alistipes_sp009774895,UBA7173_sp001689485,UBA7173_sp002491305	0.5	6	0	1
Tetrahydrofolate biosynthesis, GTP => THF	0.875003	0.349574	0.77255	test	M00126	Alistipes_sp009774895,Clostridia,UBA7173_sp001689485,UBA7173_sp002491305	0.5	6	1	1
Threonine biosynthesis, aspartate => homoserine => threonine	0.875003	0.349574	0.77255	test	M00018	COE1_sp002358575,COE1_sp009774375,Clostridia,Lawsonibacter	0.5	6	1	1
UDP-N-acetyl-D-glucosamine biosynthesis, prokaryotes, glucose => UDP-GlcNAc	0.875003	0.349574	0.77255	test	M00909	COE1_sp002358575,COE1_sp009774375,Clostridia,Lawsonibacter	0.5	6	1	1
Valine/isoleucine biosynthesis, pyruvate => valine / 2-oxobutanoate => isoleucine	0.875003	0.349574	0.77255	test	M00019	COE1_sp002358575,COE1_sp009774375,Clostridia,Lawsonibacter	0.5	6	1	1
beta-Lactam resistance, Bla system	0.466678	0.494519	0.77255	control	M00627	UBA7173_sp001689485,UBA7173_sp002491305	0.333333	6	0	1
Biotin biosynthesis, BioW pathway, pimelate => pimeloyl-CoA => biotin	0.466678	0.494519	0.77255	control	M00577	UBA7173_sp001689485,UBA7173_sp002491305	0.333333	6	0	1
Biotin biosynthesis, pimeloyl-ACP/CoA => biotin	0.466678	0.494519	0.77255	control	M00123	UBA7173_sp001689485,UBA7173_sp002491305	0.333333	6	0	1
Fatty acid biosynthesis, initiation	0.466678	0.494519	0.77255	control	M00082	COE1_sp002358575,COE1_sp009774375	0.333333	6	0	1
KDO2-lipid A biosynthesis, Raetz pathway, LpxL-LpxM type	0.466678	0.494519	0.77255	control	M00060	Alistipes_sp009774895,UBA7173_sp001689485	0.333333	6	0	1
Multidrug resistance, efflux pump MepA	0.466678	0.494519	0.77255	control	M00705	COE1_sp002358575,COE1_sp009774375	0.333333	6	0	1
Tryptophan biosynthesis, chorismate => tryptophan	0.466678	0.494519	0.77255	control	M00023	COE1_sp002358575,COE1_sp009774375	0.333333	6	0	1
Vancomycin resistance, D-Ala-D-Ser type	0.466678	0.494519	0.77255	control	M00652	COE1_sp002358575,COE1_sp009774375	0.333333	6	0	1
ADP-L-glycero-D-manno-heptose biosynthesis	0.194445	0.659243	0.77255	control	M00064	COE1_sp002358575	0.166667	6	0	1
CAM (Crassulacean acid metabolism), light	0.194445	0.659243	0.77255	control	M00169	UBA7173_sp002491305	0.166667	6	0	1
Lipoic acid biosynthesis, eukaryotes, octanoyl-ACP => dihydrolipoyl-H	0.194445	0.659243	0.77255	control	M00882	Alistipes_sp009774895	0.166667	6	0	1
Lipoic acid biosynthesis, plants and bacteria, octanoyl-ACP => dihydrolipoyl-E2/H	0.194445	0.659243	0.77255	control	M00881	Alistipes_sp009774895	0.166667	6	0	1
Menaquinone biosynthesis, futalosine pathway	0.194445	0.659243	0.77255	control	M00930	Alistipes_sp009774895	0.166667	6	0	1
Menaquinone biosynthesis, modified futalosine pathway	0.194445	0.659243	0.77255	control	M00931	Alistipes_sp009774895	0.166667	6	0	1
Methionine degradation	0.194445	0.659243	0.77255	control	M00035	Lawsonibacter	0.166667	6	0	1
NADH:quinone oxidoreductase, prokaryotes	0.194445	0.659243	0.77255	control	M00144	UBA7173_sp001689485	0.166667	6	0	1
Pentose phosphate pathway (Pentose phosphate cycle)	0.194445	0.659243	0.77255	control	M00004	COE1_sp009774375	0.166667	6	0	1
Phosphate acetyltransferase-acetate kinase pathway, acetyl-CoA => acetate	0.194445	0.659243	0.77255	control	M00579	COE1_sp002358575	0.166667	6	0	1
Pimeloyl-ACP biosynthesis, BioC-BioH pathway, malonyl-ACP => pimeloyl-ACP	0.194445	0.659243	0.77255	control	M00572	UBA7173_sp001689485	0.166667	6	0	1
Polyamine biosynthesis, arginine => agmatine => putrescine => spermidine	0.194445	0.659243	0.77255	control	M00133	COE1_sp009774375	0.166667	6	0	1
Pyrimidine ribonucleotide biosynthesis, UMP => UDP/UTP,CDP/CTP	0.194445	0.659243	0.77255	control	M00052	UBA7173_sp001689485	0.166667	6	0	1
Reductive pentose phosphate cycle, glyceraldehyde-3P => ribulose-5P	0.194445	0.659243	0.77255	control	M00167	Alistipes_sp009774895	0.166667	6	0	1
Riboflavin biosynthesis, plants and bacteria, GTP => riboflavin/FMN/FAD	0.194445	0.659243	0.77255	control	M00125	UBA7173_sp001689485	0.166667	6	0	1
Thiamine salvage pathway, HMP/HET => TMP	0.194445	0.659243	0.77255	control	M00899	Lawsonibacter	0.166667	6	0	1
V/A-type ATPase, prokaryotes	0.194445	0.659243	0.77255	control	M00159	Lawsonibacter	0.166667	6	0	1
Adenine ribonucleotide biosynthesis, IMP => ADP,ATP	0.194445	0.659243	0.77255	test	M00049	Alistipes_sp009774895,COE1_sp002358575,COE1_sp009774375,Clostridia,Lawsonibacter,UBA7173_sp001689485	0.833333	6	1	1
beta-Oxidation, acyl-CoA synthesis	0.194445	0.659243	0.77255	test	M00086	Alistipes_sp009774895,COE1_sp002358575,COE1_sp009774375,Clostridia,UBA7173_sp001689485,UBA7173_sp002491305	0.833333	6	1	1
dTDP-L-rhamnose biosynthesis	0.194445	0.659243	0.77255	test	M00793	Alistipes_sp009774895,COE1_sp002358575,COE1_sp009774375,Clostridia,UBA7173_sp001689485,UBA7173_sp002491305	0.833333	6	1	1
F-type ATPase, prokaryotes and chloroplasts	0.194445	0.659243	0.77255	test	M00157	COE1_sp002358575,COE1_sp009774375,Clostridia,Lawsonibacter,UBA7173_sp001689485,UBA7173_sp002491305	0.833333	6	1	1
Fatty acid biosynthesis, elongation	0.194445	0.659243	0.77255	test	M00083	Alistipes_sp009774895,COE1_sp002358575,COE1_sp009774375,Clostridia,UBA7173_sp001689485,UBA7173_sp002491305	0.833333	6	1	1
Glycogen degradation, glycogen => glucose-6P	0.194445	0.659243	0.77255	test	M00855	COE1_sp002358575,COE1_sp009774375,Clostridia,Lawsonibacter,UBA7173_sp001689485,UBA7173_sp002491305	0.833333	6	1	1
Lysine biosynthesis, DAP aminotransferase pathway, aspartate => lysine	0.194445	0.659243	0.77255	test	M00527	COE1_sp002358575,COE1_sp009774375,Clostridia,Lawsonibacter,UBA7173_sp001689485,UBA7173_sp002491305	0.833333	6	1	1
C5 isoprenoid biosynthesis, non-mevalonate pathway	0	1	1	NA	M00096	Alistipes_sp009774895,COE1_sp002358575,COE1_sp009774375,Clostridia,Lawsonibacter,UBA7173_sp001689485,UBA7173_sp002491305	1	6	1	1
Coenzyme A biosynthesis, pantothenate => CoA	0	1	1	NA	M00120	Alistipes_sp009774895,COE1_sp002358575,COE1_sp009774375,Clostridia,Lawsonibacter,UBA7173_sp001689485,UBA7173_sp002491305	1	6	1	1
Gluconeogenesis, oxaloacetate => fructose-6P	0	1	1	NA	M00003	Alistipes_sp009774895,COE1_sp002358575,COE1_sp009774375,Clostridia,Lawsonibacter,UBA7173_sp001689485,UBA7173_sp002491305	1	6	1	1
Glycolysis (Embden-Meyerhof pathway), glucose => pyruvate	0	1	1	NA	M00001	Alistipes_sp009774895,COE1_sp002358575,COE1_sp009774375,Clostridia,Lawsonibacter,UBA7173_sp001689485,UBA7173_sp002491305	1	6	1	1
Glycolysis, core module involving three-carbon compounds	0	1	1	NA	M00002	Alistipes_sp009774895,COE1_sp002358575,COE1_sp009774375,Clostridia,Lawsonibacter,UBA7173_sp001689485,UBA7173_sp002491305	1	6	1	1
Guanine ribonucleotide biosynthesis IMP => GDP,GTP	0	1	1	NA	M00050	Alistipes_sp009774895,COE1_sp002358575,COE1_sp009774375,Clostridia,Lawsonibacter,UBA7173_sp001689485,UBA7173_sp002491305	1	6	1	1
Inosine monophosphate biosynthesis, PRPP + glutamine => IMP	0	1	1	NA	M00048	Alistipes_sp009774895,COE1_sp002358575,COE1_sp009774375,Clostridia,Lawsonibacter,UBA7173_sp001689485,UBA7173_sp002491305	1	6	1	1
Pentose phosphate pathway, non-oxidative phase, fructose 6P => ribose 5P	0	1	1	NA	M00007	Alistipes_sp009774895,COE1_sp002358575,COE1_sp009774375,Clostridia,Lawsonibacter,UBA7173_sp001689485,UBA7173_sp002491305	1	6	1	1
PRPP biosynthesis, ribose 5P => PRPP	0	1	1	NA	M00005	Alistipes_sp009774895,COE1_sp002358575,COE1_sp009774375,Clostridia,Lawsonibacter,UBA7173_sp001689485,UBA7173_sp002491305	1	6	1	1
Shikimate pathway, phosphoenolpyruvate + erythrose-4P => chorismate	0	1	1	NA	M00022	Alistipes_sp009774895,COE1_sp002358575,COE1_sp009774375,Clostridia,Lawsonibacter,UBA7173_sp001689485,UBA7173_sp002491305	1	6	1	1
Uridine monophosphate biosynthesis, glutamine (+ PRPP) => UMP	0	1	1	NA	M00051	Alistipes_sp009774895,COE1_sp002358575,COE1_sp009774375,Clostridia,Lawsonibacter,UBA7173_sp001689485,UBA7173_sp002491305	1	6	1	1

## Sheet: COE1_sp002358575-enriched
KEGG_MODULE	enrichment_score	unadjusted_p_value	adjusted_q_value	associated_groups	accession	sample_ids	p_control	N_control	p_test	N_test
ADP-L-glycero-D-manno-heptose biosynthesis	7.00002	0.00815089	0.305659	test	M00064	COE1_sp002358575	0	6	1	1
Phosphate acetyltransferase-acetate kinase pathway, acetyl-CoA => acetate	7.00002	0.00815089	0.305659	test	M00579	COE1_sp002358575	0	6	1	1
Fatty acid biosynthesis, initiation	2.91667	0.0876688	0.77255	test	M00082	COE1_sp002358575,COE1_sp009774375	0.166667	6	1	1
Multidrug resistance, efflux pump MepA	2.91667	0.0876688	0.77255	test	M00705	COE1_sp002358575,COE1_sp009774375	0.166667	6	1	1
Tryptophan biosynthesis, chorismate => tryptophan	2.91667	0.0876688	0.77255	test	M00023	COE1_sp002358575,COE1_sp009774375	0.166667	6	1	1
Vancomycin resistance, D-Ala-D-Ser type	2.91667	0.0876688	0.77255	test	M00652	COE1_sp002358575,COE1_sp009774375	0.166667	6	1	1
Histidine degradation, histidine => N-formiminoglutamate => glutamate	1.55557	0.212315	0.77255	control	M00045	Alistipes_sp009774895,Lawsonibacter,UBA7173_sp001689485,UBA7173_sp002491305	0.666667	6	0	1
Tetrahydrofolate biosynthesis, GTP => THF	1.55557	0.212315	0.77255	control	M00126	Alistipes_sp009774895,Clostridia,UBA7173_sp001689485,UBA7173_sp002491305	0.666667	6	0	1
C1-unit interconversion, prokaryotes	1.55557	0.212315	0.77255	test	M00140	COE1_sp002358575,COE1_sp009774375,Clostridia	0.333333	6	1	1
D-Galacturonate degradation (bacteria), D-galacturonate => pyruvate + D-glyceraldehyde 3P	1.55557	0.212315	0.77255	test	M00631	COE1_sp002358575,COE1_sp009774375,Lawsonibacter	0.333333	6	1	1
Leucine biosynthesis, 2-oxoisovalerate => 2-oxoisocaproate	1.55557	0.212315	0.77255	test	M00432	COE1_sp002358575,COE1_sp009774375,Clostridia	0.333333	6	1	1
Arginine biosynthesis, ornithine => arginine	0.875003	0.349574	0.77255	test	M00844	COE1_sp002358575,COE1_sp009774375,Clostridia,Lawsonibacter	0.5	6	1	1
Citrate cycle, second carbon oxidation, 2-oxoglutarate => oxaloacetate	0.875003	0.349574	0.77255	control	M00011	Alistipes_sp009774895,UBA7173_sp001689485,UBA7173_sp002491305	0.5	6	0	1
CMP-KDO biosynthesis	0.875003	0.349574	0.77255	control	M00063	Alistipes_sp009774895,UBA7173_sp001689485,UBA7173_sp002491305	0.5	6	0	1
Cysteine biosynthesis, serine => cysteine	0.875003	0.349574	0.77255	test	M00021	COE1_sp002358575,COE1_sp009774375,Clostridia,Lawsonibacter	0.5	6	1	1
D-Glucuronate degradation, D-glucuronate => pyruvate + D-glyceraldehyde 3P	0.875003	0.349574	0.77255	test	M00061	COE1_sp002358575,COE1_sp009774375,Clostridia,Lawsonibacter	0.5	6	1	1
Galactose degradation, Leloir pathway, galactose => alpha-D-glucose-1P	0.875003	0.349574	0.77255	control	M00632	Alistipes_sp009774895,Clostridia,UBA7173_sp001689485	0.5	6	0	1
Glycogen biosynthesis, glucose-1P => glycogen/starch	0.875003	0.349574	0.77255	test	M00854	COE1_sp002358575,COE1_sp009774375,Clostridia,Lawsonibacter	0.5	6	1	1
Histidine biosynthesis, PRPP => histidine	0.875003	0.349574	0.77255	test	M00026	COE1_sp002358575,COE1_sp009774375,Clostridia,Lawsonibacter	0.5	6	1	1
Isoleucine biosynthesis, threonine => 2-oxobutanoate => isoleucine	0.875003	0.349574	0.77255	test	M00570	COE1_sp002358575,COE1_sp009774375,Clostridia,Lawsonibacter	0.5	6	1	1
KDO2-lipid A biosynthesis, Raetz pathway, non-LpxL-LpxM type	0.875003	0.349574	0.77255	control	M00866	Alistipes_sp009774895,UBA7173_sp001689485,UBA7173_sp002491305	0.5	6	0	1
Lysine biosynthesis, DAP dehydrogenase pathway, aspartate => lysine	0.875003	0.349574	0.77255	test	M00526	COE1_sp002358575,COE1_sp009774375,Clostridia,Lawsonibacter	0.5	6	1	1
Lysine biosynthesis, succinyl-DAP pathway, aspartate => lysine	0.875003	0.349574	0.77255	test	M00016	COE1_sp002358575,COE1_sp009774375,Clostridia,Lawsonibacter	0.5	6	1	1
Ornithine biosynthesis, glutamate => ornithine	0.875003	0.349574	0.77255	test	M00028	COE1_sp002358575,COE1_sp009774375,Clostridia,Lawsonibacter	0.5	6	1	1
Pantothenate biosynthesis, valine/L-aspartate => pantothenate	0.875003	0.349574	0.77255	control	M00119	Alistipes_sp009774895,UBA7173_sp001689485,UBA7173_sp002491305	0.5	6	0	1
Phosphatidylethanolamine (PE) biosynthesis, PA => PS => PE	0.875003	0.349574	0.77255	control	M00093	Alistipes_sp009774895,UBA7173_sp001689485,UBA7173_sp002491305	0.5	6	0	1
Proline biosynthesis, glutamate => proline	0.875003	0.349574	0.77255	test	M00015	COE1_sp002358575,COE1_sp009774375,Clostridia,Lawsonibacter	0.5	6	1	1
Propanoyl-CoA metabolism, propanoyl-CoA => succinyl-CoA	0.875003	0.349574	0.77255	control	M00741	Alistipes_sp009774895,UBA7173_sp001689485,UBA7173_sp002491305	0.5	6	0	1
Semi-phosphorylative Entner-Doudoroff pathway, gluconate => glycerate-3P	0.875003	0.349574	0.77255	test	M00308	COE1_sp002358575,COE1_sp009774375,Clostridia,Lawsonibacter	0.5	6	1	1
Succinate dehydrogenase, prokaryotes	0.875003	0.349574	0.77255	control	M00149	Alistipes_sp009774895,UBA7173_sp001689485,UBA7173_sp002491305	0.5	6	0	1
Threonine biosynthesis, aspartate => homoserine => threonine	0.875003	0.349574	0.77255	test	M00018	COE1_sp002358575,COE1_sp009774375,Clostridia,Lawsonibacter	0.5	6	1	1
UDP-N-acetyl-D-glucosamine biosynthesis, prokaryotes, glucose => UDP-GlcNAc	0.875003	0.349574	0.77255	test	M00909	COE1_sp002358575,COE1_sp009774375,Clostridia,Lawsonibacter	0.5	6	1	1
Valine/isoleucine biosynthesis, pyruvate => valine / 2-oxobutanoate => isoleucine	0.875003	0.349574	0.77255	test	M00019	COE1_sp002358575,COE1_sp009774375,Clostridia,Lawsonibacter	0.5	6	1	1
NAD biosynthesis, aspartate => quinolinate => NAD	0.466678	0.494519	0.77255	test	M00115	Alistipes_sp009774895,COE1_sp002358575,COE1_sp009774375,UBA7173_sp001689485,UBA7173_sp002491305	0.666667	6	1	1
beta-Lactam resistance, Bla system	0.466678	0.494519	0.77255	control	M00627	UBA7173_sp001689485,UBA7173_sp002491305	0.333333	6	0	1
Biotin biosynthesis, BioW pathway, pimelate => pimeloyl-CoA => biotin	0.466678	0.494519	0.77255	control	M00577	UBA7173_sp001689485,UBA7173_sp002491305	0.333333	6	0	1
Biotin biosynthesis, pimeloyl-ACP/CoA => biotin	0.466678	0.494519	0.77255	control	M00123	UBA7173_sp001689485,UBA7173_sp002491305	0.333333	6	0	1
KDO2-lipid A biosynthesis, Raetz pathway, LpxL-LpxM type	0.466678	0.494519	0.77255	control	M00060	Alistipes_sp009774895,UBA7173_sp001689485	0.333333	6	0	1
Methionine biosynthesis, apartate => homoserine => methionine	0.466678	0.494519	0.77255	control	M00017	Clostridia,Lawsonibacter	0.333333	6	0	1
Acylglycerol degradation	0.194445	0.659243	0.77255	control	M00098	Clostridia	0.166667	6	0	1
CAM (Crassulacean acid metabolism), light	0.194445	0.659243	0.77255	control	M00169	UBA7173_sp002491305	0.166667	6	0	1
Lipoic acid biosynthesis, eukaryotes, octanoyl-ACP => dihydrolipoyl-H	0.194445	0.659243	0.77255	control	M00882	Alistipes_sp009774895	0.166667	6	0	1
Lipoic acid biosynthesis, plants and bacteria, octanoyl-ACP => dihydrolipoyl-E2/H	0.194445	0.659243	0.77255	control	M00881	Alistipes_sp009774895	0.166667	6	0	1
Menaquinone biosynthesis, futalosine pathway	0.194445	0.659243	0.77255	control	M00930	Alistipes_sp009774895	0.166667	6	0	1
Menaquinone biosynthesis, modified futalosine pathway	0.194445	0.659243	0.77255	control	M00931	Alistipes_sp009774895	0.166667	6	0	1
Methionine degradation	0.194445	0.659243	0.77255	control	M00035	Lawsonibacter	0.166667	6	0	1
NADH:quinone oxidoreductase, prokaryotes	0.194445	0.659243	0.77255	control	M00144	UBA7173_sp001689485	0.166667	6	0	1
Pentose phosphate pathway (Pentose phosphate cycle)	0.194445	0.659243	0.77255	control	M00004	COE1_sp009774375	0.166667	6	0	1
Pimeloyl-ACP biosynthesis, BioC-BioH pathway, malonyl-ACP => pimeloyl-ACP	0.194445	0.659243	0.77255	control	M00572	UBA7173_sp001689485	0.166667	6	0	1
Polyamine biosynthesis, arginine => agmatine => putrescine => spermidine	0.194445	0.659243	0.77255	control	M00133	COE1_sp009774375	0.166667	6	0	1
Pyrimidine ribonucleotide biosynthesis, UMP => UDP/UTP,CDP/CTP	0.194445	0.659243	0.77255	control	M00052	UBA7173_sp001689485	0.166667	6	0	1
Reductive pentose phosphate cycle, glyceraldehyde-3P => ribulose-5P	0.194445	0.659243	0.77255	control	M00167	Alistipes_sp009774895	0.166667	6	0	1
Riboflavin biosynthesis, plants and bacteria, GTP => riboflavin/FMN/FAD	0.194445	0.659243	0.77255	control	M00125	UBA7173_sp001689485	0.166667	6	0	1
Thiamine salvage pathway, HMP/HET => TMP	0.194445	0.659243	0.77255	control	M00899	Lawsonibacter	0.166667	6	0	1
V/A-type ATPase, prokaryotes	0.194445	0.659243	0.77255	control	M00159	Lawsonibacter	0.166667	6	0	1
Adenine ribonucleotide biosynthesis, IMP => ADP,ATP	0.194445	0.659243	0.77255	test	M00049	Alistipes_sp009774895,COE1_sp002358575,COE1_sp009774375,Clostridia,Lawsonibacter,UBA7173_sp001689485	0.833333	6	1	1
beta-Oxidation, acyl-CoA synthesis	0.194445	0.659243	0.77255	test	M00086	Alistipes_sp009774895,COE1_sp002358575,COE1_sp009774375,Clostridia,UBA7173_sp001689485,UBA7173_sp002491305	0.833333	6	1	1
dTDP-L-rhamnose biosynthesis	0.194445	0.659243	0.77255	test	M00793	Alistipes_sp009774895,COE1_sp002358575,COE1_sp009774375,Clostridia,UBA7173_sp001689485,UBA7173_sp002491305	0.833333	6	1	1
F-type ATPase, prokaryotes and chloroplasts	0.194445	0.659243	0.77255	test	M00157	COE1_sp002358575,COE1_sp009774375,Clostridia,Lawsonibacter,UBA7173_sp001689485,UBA7173_sp002491305	0.833333	6	1	1
Fatty acid biosynthesis, elongation	0.194445	0.659243	0.77255	test	M00083	Alistipes_sp009774895,COE1_sp002358575,COE1_sp009774375,Clostridia,UBA7173_sp001689485,UBA7173_sp002491305	0.833333	6	1	1
Glycogen degradation, glycogen => glucose-6P	0.194445	0.659243	0.77255	test	M00855	COE1_sp002358575,COE1_sp009774375,Clostridia,Lawsonibacter,UBA7173_sp001689485,UBA7173_sp002491305	0.833333	6	1	1
Lysine biosynthesis, DAP aminotransferase pathway, aspartate => lysine	0.194445	0.659243	0.77255	test	M00527	COE1_sp002358575,COE1_sp009774375,Clostridia,Lawsonibacter,UBA7173_sp001689485,UBA7173_sp002491305	0.833333	6	1	1
Pyruvate oxidation, pyruvate => acetyl-CoA	0.194445	0.659243	0.77255	test	M00307	Alistipes_sp009774895,COE1_sp002358575,COE1_sp009774375,Lawsonibacter,UBA7173_sp001689485,UBA7173_sp002491305	0.833333	6	1	1
Serine biosynthesis, glycerate-3P => serine	0.194445	0.659243	0.77255	test	M00020	Alistipes_sp009774895,COE1_sp002358575,COE1_sp009774375,Lawsonibacter,UBA7173_sp001689485,UBA7173_sp002491305	0.833333	6	1	1
C5 isoprenoid biosynthesis, non-mevalonate pathway	0	1	1	NA	M00096	Alistipes_sp009774895,COE1_sp002358575,COE1_sp009774375,Clostridia,Lawsonibacter,UBA7173_sp001689485,UBA7173_sp002491305	1	6	1	1
Coenzyme A biosynthesis, pantothenate => CoA	0	1	1	NA	M00120	Alistipes_sp009774895,COE1_sp002358575,COE1_sp009774375,Clostridia,Lawsonibacter,UBA7173_sp001689485,UBA7173_sp002491305	1	6	1	1
Gluconeogenesis, oxaloacetate => fructose-6P	0	1	1	NA	M00003	Alistipes_sp009774895,COE1_sp002358575,COE1_sp009774375,Clostridia,Lawsonibacter,UBA7173_sp001689485,UBA7173_sp002491305	1	6	1	1
Glycolysis (Embden-Meyerhof pathway), glucose => pyruvate	0	1	1	NA	M00001	Alistipes_sp009774895,COE1_sp002358575,COE1_sp009774375,Clostridia,Lawsonibacter,UBA7173_sp001689485,UBA7173_sp002491305	1	6	1	1
Glycolysis, core module involving three-carbon compounds	0	1	1	NA	M00002	Alistipes_sp009774895,COE1_sp002358575,COE1_sp009774375,Clostridia,Lawsonibacter,UBA7173_sp001689485,UBA7173_sp002491305	1	6	1	1
Guanine ribonucleotide biosynthesis IMP => GDP,GTP	0	1	1	NA	M00050	Alistipes_sp009774895,COE1_sp002358575,COE1_sp009774375,Clostridia,Lawsonibacter,UBA7173_sp001689485,UBA7173_sp002491305	1	6	1	1
Inosine monophosphate biosynthesis, PRPP + glutamine => IMP	0	1	1	NA	M00048	Alistipes_sp009774895,COE1_sp002358575,COE1_sp009774375,Clostridia,Lawsonibacter,UBA7173_sp001689485,UBA7173_sp002491305	1	6	1	1
Pentose phosphate pathway, non-oxidative phase, fructose 6P => ribose 5P	0	1	1	NA	M00007	Alistipes_sp009774895,COE1_sp002358575,COE1_sp009774375,Clostridia,Lawsonibacter,UBA7173_sp001689485,UBA7173_sp002491305	1	6	1	1
PRPP biosynthesis, ribose 5P => PRPP	0	1	1	NA	M00005	Alistipes_sp009774895,COE1_sp002358575,COE1_sp009774375,Clostridia,Lawsonibacter,UBA7173_sp001689485,UBA7173_sp002491305	1	6	1	1
Shikimate pathway, phosphoenolpyruvate + erythrose-4P => chorismate	0	1	1	NA	M00022	Alistipes_sp009774895,COE1_sp002358575,COE1_sp009774375,Clostridia,Lawsonibacter,UBA7173_sp001689485,UBA7173_sp002491305	1	6	1	1
Uridine monophosphate biosynthesis, glutamine (+ PRPP) => UMP	0	1	1	NA	M00051	Alistipes_sp009774895,COE1_sp002358575,COE1_sp009774375,Clostridia,Lawsonibacter,UBA7173_sp001689485,UBA7173_sp002491305	1	6	1	1

## Sheet: COE1_sp009774375-enriched
KEGG_MODULE	enrichment_score	unadjusted_p_value	adjusted_q_value	associated_groups	accession	sample_ids	p_control	N_control	p_test	N_test
Pentose phosphate pathway (Pentose phosphate cycle)	7.00002	0.00815089	0.305659	test	M00004	COE1_sp009774375	0	6	1	1
Polyamine biosynthesis, arginine => agmatine => putrescine => spermidine	7.00002	0.00815089	0.305659	test	M00133	COE1_sp009774375	0	6	1	1
Fatty acid biosynthesis, initiation	2.91667	0.0876688	0.77255	test	M00082	COE1_sp002358575,COE1_sp009774375	0.166667	6	1	1
Multidrug resistance, efflux pump MepA	2.91667	0.0876688	0.77255	test	M00705	COE1_sp002358575,COE1_sp009774375	0.166667	6	1	1
Tryptophan biosynthesis, chorismate => tryptophan	2.91667	0.0876688	0.77255	test	M00023	COE1_sp002358575,COE1_sp009774375	0.166667	6	1	1
Vancomycin resistance, D-Ala-D-Ser type	2.91667	0.0876688	0.77255	test	M00652	COE1_sp002358575,COE1_sp009774375	0.166667	6	1	1
Histidine degradation, histidine => N-formiminoglutamate => glutamate	1.55557	0.212315	0.77255	control	M00045	Alistipes_sp009774895,Lawsonibacter,UBA7173_sp001689485,UBA7173_sp002491305	0.666667	6	0	1
Tetrahydrofolate biosynthesis, GTP => THF	1.55557	0.212315	0.77255	control	M00126	Alistipes_sp009774895,Clostridia,UBA7173_sp001689485,UBA7173_sp002491305	0.666667	6	0	1
C1-unit interconversion, prokaryotes	1.55557	0.212315	0.77255	test	M00140	COE1_sp002358575,COE1_sp009774375,Clostridia	0.333333	6	1	1
D-Galacturonate degradation (bacteria), D-galacturonate => pyruvate + D-glyceraldehyde 3P	1.55557	0.212315	0.77255	test	M00631	COE1_sp002358575,COE1_sp009774375,Lawsonibacter	0.333333	6	1	1
Leucine biosynthesis, 2-oxoisovalerate => 2-oxoisocaproate	1.55557	0.212315	0.77255	test	M00432	COE1_sp002358575,COE1_sp009774375,Clostridia	0.333333	6	1	1
Arginine biosynthesis, ornithine => arginine	0.875003	0.349574	0.77255	test	M00844	COE1_sp002358575,COE1_sp009774375,Clostridia,Lawsonibacter	0.5	6	1	1
Citrate cycle, second carbon oxidation, 2-oxoglutarate => oxaloacetate	0.875003	0.349574	0.77255	control	M00011	Alistipes_sp009774895,UBA7173_sp001689485,UBA7173_sp002491305	0.5	6	0	1
CMP-KDO biosynthesis	0.875003	0.349574	0.77255	control	M00063	Alistipes_sp009774895,UBA7173_sp001689485,UBA7173_sp002491305	0.5	6	0	1
Cysteine biosynthesis, serine => cysteine	0.875003	0.349574	0.77255	test	M00021	COE1_sp002358575,COE1_sp009774375,Clostridia,Lawsonibacter	0.5	6	1	1
D-Glucuronate degradation, D-glucuronate => pyruvate + D-glyceraldehyde 3P	0.875003	0.349574	0.77255	test	M00061	COE1_sp002358575,COE1_sp009774375,Clostridia,Lawsonibacter	0.5	6	1	1
Galactose degradation, Leloir pathway, galactose => alpha-D-glucose-1P	0.875003	0.349574	0.77255	control	M00632	Alistipes_sp009774895,Clostridia,UBA7173_sp001689485	0.5	6	0	1
Glycogen biosynthesis, glucose-1P => glycogen/starch	0.875003	0.349574	0.77255	test	M00854	COE1_sp002358575,COE1_sp009774375,Clostridia,Lawsonibacter	0.5	6	1	1
Histidine biosynthesis, PRPP => histidine	0.875003	0.349574	0.77255	test	M00026	COE1_sp002358575,COE1_sp009774375,Clostridia,Lawsonibacter	0.5	6	1	1
Isoleucine biosynthesis, threonine => 2-oxobutanoate => isoleucine	0.875003	0.349574	0.77255	test	M00570	COE1_sp002358575,COE1_sp009774375,Clostridia,Lawsonibacter	0.5	6	1	1
KDO2-lipid A biosynthesis, Raetz pathway, non-LpxL-LpxM type	0.875003	0.349574	0.77255	control	M00866	Alistipes_sp009774895,UBA7173_sp001689485,UBA7173_sp002491305	0.5	6	0	1
Lysine biosynthesis, DAP dehydrogenase pathway, aspartate => lysine	0.875003	0.349574	0.77255	test	M00526	COE1_sp002358575,COE1_sp009774375,Clostridia,Lawsonibacter	0.5	6	1	1
Lysine biosynthesis, succinyl-DAP pathway, aspartate => lysine	0.875003	0.349574	0.77255	test	M00016	COE1_sp002358575,COE1_sp009774375,Clostridia,Lawsonibacter	0.5	6	1	1
Ornithine biosynthesis, glutamate => ornithine	0.875003	0.349574	0.77255	test	M00028	COE1_sp002358575,COE1_sp009774375,Clostridia,Lawsonibacter	0.5	6	1	1
Pantothenate biosynthesis, valine/L-aspartate => pantothenate	0.875003	0.349574	0.77255	control	M00119	Alistipes_sp009774895,UBA7173_sp001689485,UBA7173_sp002491305	0.5	6	0	1
Phosphatidylethanolamine (PE) biosynthesis, PA => PS => PE	0.875003	0.349574	0.77255	control	M00093	Alistipes_sp009774895,UBA7173_sp001689485,UBA7173_sp002491305	0.5	6	0	1
Proline biosynthesis, glutamate => proline	0.875003	0.349574	0.77255	test	M00015	COE1_sp002358575,COE1_sp009774375,Clostridia,Lawsonibacter	0.5	6	1	1
Propanoyl-CoA metabolism, propanoyl-CoA => succinyl-CoA	0.875003	0.349574	0.77255	control	M00741	Alistipes_sp009774895,UBA7173_sp001689485,UBA7173_sp002491305	0.5	6	0	1
Semi-phosphorylative Entner-Doudoroff pathway, gluconate => glycerate-3P	0.875003	0.349574	0.77255	test	M00308	COE1_sp002358575,COE1_sp009774375,Clostridia,Lawsonibacter	0.5	6	1	1
Succinate dehydrogenase, prokaryotes	0.875003	0.349574	0.77255	control	M00149	Alistipes_sp009774895,UBA7173_sp001689485,UBA7173_sp002491305	0.5	6	0	1
Threonine biosynthesis, aspartate => homoserine => threonine	0.875003	0.349574	0.77255	test	M00018	COE1_sp002358575,COE1_sp009774375,Clostridia,Lawsonibacter	0.5	6	1	1
UDP-N-acetyl-D-glucosamine biosynthesis, prokaryotes, glucose => UDP-GlcNAc	0.875003	0.349574	0.77255	test	M00909	COE1_sp002358575,COE1_sp009774375,Clostridia,Lawsonibacter	0.5	6	1	1
Valine/isoleucine biosynthesis, pyruvate => valine / 2-oxobutanoate => isoleucine	0.875003	0.349574	0.77255	test	M00019	COE1_sp002358575,COE1_sp009774375,Clostridia,Lawsonibacter	0.5	6	1	1
NAD biosynthesis, aspartate => quinolinate => NAD	0.466678	0.494519	0.77255	test	M00115	Alistipes_sp009774895,COE1_sp002358575,COE1_sp009774375,UBA7173_sp001689485,UBA7173_sp002491305	0.666667	6	1	1
beta-Lactam resistance, Bla system	0.466678	0.494519	0.77255	control	M00627	UBA7173_sp001689485,UBA7173_sp002491305	0.333333	6	0	1
Biotin biosynthesis, BioW pathway, pimelate => pimeloyl-CoA => biotin	0.466678	0.494519	0.77255	control	M00577	UBA7173_sp001689485,UBA7173_sp002491305	0.333333	6	0	1
Biotin biosynthesis, pimeloyl-ACP/CoA => biotin	0.466678	0.494519	0.77255	control	M00123	UBA7173_sp001689485,UBA7173_sp002491305	0.333333	6	0	1
KDO2-lipid A biosynthesis, Raetz pathway, LpxL-LpxM type	0.466678	0.494519	0.77255	control	M00060	Alistipes_sp009774895,UBA7173_sp001689485	0.333333	6	0	1
Methionine biosynthesis, apartate => homoserine => methionine	0.466678	0.494519	0.77255	control	M00017	Clostridia,Lawsonibacter	0.333333	6	0	1
Acylglycerol degradation	0.194445	0.659243	0.77255	control	M00098	Clostridia	0.166667	6	0	1
ADP-L-glycero-D-manno-heptose biosynthesis	0.194445	0.659243	0.77255	control	M00064	COE1_sp002358575	0.166667	6	0	1
CAM (Crassulacean acid metabolism), light	0.194445	0.659243	0.77255	control	M00169	UBA7173_sp002491305	0.166667	6	0	1
Lipoic acid biosynthesis, eukaryotes, octanoyl-ACP => dihydrolipoyl-H	0.194445	0.659243	0.77255	control	M00882	Alistipes_sp009774895	0.166667	6	0	1
Lipoic acid biosynthesis, plants and bacteria, octanoyl-ACP => dihydrolipoyl-E2/H	0.194445	0.659243	0.77255	control	M00881	Alistipes_sp009774895	0.166667	6	0	1
Menaquinone biosynthesis, futalosine pathway	0.194445	0.659243	0.77255	control	M00930	Alistipes_sp009774895	0.166667	6	0	1
Menaquinone biosynthesis, modified futalosine pathway	0.194445	0.659243	0.77255	control	M00931	Alistipes_sp009774895	0.166667	6	0	1
Methionine degradation	0.194445	0.659243	0.77255	control	M00035	Lawsonibacter	0.166667	6	0	1
NADH:quinone oxidoreductase, prokaryotes	0.194445	0.659243	0.77255	control	M00144	UBA7173_sp001689485	0.166667	6	0	1
Phosphate acetyltransferase-acetate kinase pathway, acetyl-CoA => acetate	0.194445	0.659243	0.77255	control	M00579	COE1_sp002358575	0.166667	6	0	1
Pimeloyl-ACP biosynthesis, BioC-BioH pathway, malonyl-ACP => pimeloyl-ACP	0.194445	0.659243	0.77255	control	M00572	UBA7173_sp001689485	0.166667	6	0	1
Pyrimidine ribonucleotide biosynthesis, UMP => UDP/UTP,CDP/CTP	0.194445	0.659243	0.77255	control	M00052	UBA7173_sp001689485	0.166667	6	0	1
Reductive pentose phosphate cycle, glyceraldehyde-3P => ribulose-5P	0.194445	0.659243	0.77255	control	M00167	Alistipes_sp009774895	0.166667	6	0	1
Riboflavin biosynthesis, plants and bacteria, GTP => riboflavin/FMN/FAD	0.194445	0.659243	0.77255	control	M00125	UBA7173_sp001689485	0.166667	6	0	1
Thiamine salvage pathway, HMP/HET => TMP	0.194445	0.659243	0.77255	control	M00899	Lawsonibacter	0.166667	6	0	1
V/A-type ATPase, prokaryotes	0.194445	0.659243	0.77255	control	M00159	Lawsonibacter	0.166667	6	0	1
Adenine ribonucleotide biosynthesis, IMP => ADP,ATP	0.194445	0.659243	0.77255	test	M00049	Alistipes_sp009774895,COE1_sp002358575,COE1_sp009774375,Clostridia,Lawsonibacter,UBA7173_sp001689485	0.833333	6	1	1
beta-Oxidation, acyl-CoA synthesis	0.194445	0.659243	0.77255	test	M00086	Alistipes_sp009774895,COE1_sp002358575,COE1_sp009774375,Clostridia,UBA7173_sp001689485,UBA7173_sp002491305	0.833333	6	1	1
dTDP-L-rhamnose biosynthesis	0.194445	0.659243	0.77255	test	M00793	Alistipes_sp009774895,COE1_sp002358575,COE1_sp009774375,Clostridia,UBA7173_sp001689485,UBA7173_sp002491305	0.833333	6	1	1
F-type ATPase, prokaryotes and chloroplasts	0.194445	0.659243	0.77255	test	M00157	COE1_sp002358575,COE1_sp009774375,Clostridia,Lawsonibacter,UBA7173_sp001689485,UBA7173_sp002491305	0.833333	6	1	1
Fatty acid biosynthesis, elongation	0.194445	0.659243	0.77255	test	M00083	Alistipes_sp009774895,COE1_sp002358575,COE1_sp009774375,Clostridia,UBA7173_sp001689485,UBA7173_sp002491305	0.833333	6	1	1
Glycogen degradation, glycogen => glucose-6P	0.194445	0.659243	0.77255	test	M00855	COE1_sp002358575,COE1_sp009774375,Clostridia,Lawsonibacter,UBA7173_sp001689485,UBA7173_sp002491305	0.833333	6	1	1
Lysine biosynthesis, DAP aminotransferase pathway, aspartate => lysine	0.194445	0.659243	0.77255	test	M00527	COE1_sp002358575,COE1_sp009774375,Clostridia,Lawsonibacter,UBA7173_sp001689485,UBA7173_sp002491305	0.833333	6	1	1
Pyruvate oxidation, pyruvate => acetyl-CoA	0.194445	0.659243	0.77255	test	M00307	Alistipes_sp009774895,COE1_sp002358575,COE1_sp009774375,Lawsonibacter,UBA7173_sp001689485,UBA7173_sp002491305	0.833333	6	1	1
Serine biosynthesis, glycerate-3P => serine	0.194445	0.659243	0.77255	test	M00020	Alistipes_sp009774895,COE1_sp002358575,COE1_sp009774375,Lawsonibacter,UBA7173_sp001689485,UBA7173_sp002491305	0.833333	6	1	1
C5 isoprenoid biosynthesis, non-mevalonate pathway	0	1	1	NA	M00096	Alistipes_sp009774895,COE1_sp002358575,COE1_sp009774375,Clostridia,Lawsonibacter,UBA7173_sp001689485,UBA7173_sp002491305	1	6	1	1
Coenzyme A biosynthesis, pantothenate => CoA	0	1	1	NA	M00120	Alistipes_sp009774895,COE1_sp002358575,COE1_sp009774375,Clostridia,Lawsonibacter,UBA7173_sp001689485,UBA7173_sp002491305	1	6	1	1
Gluconeogenesis, oxaloacetate => fructose-6P	0	1	1	NA	M00003	Alistipes_sp009774895,COE1_sp002358575,COE1_sp009774375,Clostridia,Lawsonibacter,UBA7173_sp001689485,UBA7173_sp002491305	1	6	1	1
Glycolysis (Embden-Meyerhof pathway), glucose => pyruvate	0	1	1	NA	M00001	Alistipes_sp009774895,COE1_sp002358575,COE1_sp009774375,Clostridia,Lawsonibacter,UBA7173_sp001689485,UBA7173_sp002491305	1	6	1	1
Glycolysis, core module involving three-carbon compounds	0	1	1	NA	M00002	Alistipes_sp009774895,COE1_sp002358575,COE1_sp009774375,Clostridia,Lawsonibacter,UBA7173_sp001689485,UBA7173_sp002491305	1	6	1	1
Guanine ribonucleotide biosynthesis IMP => GDP,GTP	0	1	1	NA	M00050	Alistipes_sp009774895,COE1_sp002358575,COE1_sp009774375,Clostridia,Lawsonibacter,UBA7173_sp001689485,UBA7173_sp002491305	1	6	1	1
Inosine monophosphate biosynthesis, PRPP + glutamine => IMP	0	1	1	NA	M00048	Alistipes_sp009774895,COE1_sp002358575,COE1_sp009774375,Clostridia,Lawsonibacter,UBA7173_sp001689485,UBA7173_sp002491305	1	6	1	1
Pentose phosphate pathway, non-oxidative phase, fructose 6P => ribose 5P	0	1	1	NA	M00007	Alistipes_sp009774895,COE1_sp002358575,COE1_sp009774375,Clostridia,Lawsonibacter,UBA7173_sp001689485,UBA7173_sp002491305	1	6	1	1
PRPP biosynthesis, ribose 5P => PRPP	0	1	1	NA	M00005	Alistipes_sp009774895,COE1_sp002358575,COE1_sp009774375,Clostridia,Lawsonibacter,UBA7173_sp001689485,UBA7173_sp002491305	1	6	1	1
Shikimate pathway, phosphoenolpyruvate + erythrose-4P => chorismate	0	1	1	NA	M00022	Alistipes_sp009774895,COE1_sp002358575,COE1_sp009774375,Clostridia,Lawsonibacter,UBA7173_sp001689485,UBA7173_sp002491305	1	6	1	1
Uridine monophosphate biosynthesis, glutamine (+ PRPP) => UMP	0	1	1	NA	M00051	Alistipes_sp009774895,COE1_sp002358575,COE1_sp009774375,Clostridia,Lawsonibacter,UBA7173_sp001689485,UBA7173_sp002491305	1	6	1	1

## Sheet: Lawsonibacter-enriched
KEGG_MODULE	enrichment_score	unadjusted_p_value	adjusted_q_value	associated_groups	accession	sample_ids	p_control	N_control	p_test	N_test
beta-Oxidation, acyl-CoA synthesis	7.00002	0.00815089	0.101886	control	M00086	Alistipes_sp009774895,COE1_sp002358575,COE1_sp009774375,Clostridia,UBA7173_sp001689485,UBA7173_sp002491305	1	6	0	1
dTDP-L-rhamnose biosynthesis	7.00002	0.00815089	0.101886	control	M00793	Alistipes_sp009774895,COE1_sp002358575,COE1_sp009774375,Clostridia,UBA7173_sp001689485,UBA7173_sp002491305	1	6	0	1
Fatty acid biosynthesis, elongation	7.00002	0.00815089	0.101886	control	M00083	Alistipes_sp009774895,COE1_sp002358575,COE1_sp009774375,Clostridia,UBA7173_sp001689485,UBA7173_sp002491305	1	6	0	1
Methionine degradation	7.00002	0.00815089	0.101886	test	M00035	Lawsonibacter	0	6	1	1
Thiamine salvage pathway, HMP/HET => TMP	7.00002	0.00815089	0.101886	test	M00899	Lawsonibacter	0	6	1	1
V/A-type ATPase, prokaryotes	7.00002	0.00815089	0.101886	test	M00159	Lawsonibacter	0	6	1	1
Methionine biosynthesis, apartate => homoserine => methionine	2.91667	0.0876688	0.749087	test	M00017	Clostridia,Lawsonibacter	0.166667	6	1	1
NAD biosynthesis, aspartate => quinolinate => NAD	2.91667	0.0876688	0.749087	control	M00115	Alistipes_sp009774895,COE1_sp002358575,COE1_sp009774375,UBA7173_sp001689485,UBA7173_sp002491305	0.833333	6	0	1
Tetrahydrofolate biosynthesis, GTP => THF	1.55557	0.212315	0.749087	control	M00126	Alistipes_sp009774895,Clostridia,UBA7173_sp001689485,UBA7173_sp002491305	0.666667	6	0	1
D-Galacturonate degradation (bacteria), D-galacturonate => pyruvate + D-glyceraldehyde 3P	1.55557	0.212315	0.749087	test	M00631	COE1_sp002358575,COE1_sp009774375,Lawsonibacter	0.333333	6	1	1
Arginine biosynthesis, ornithine => arginine	0.875003	0.349574	0.749087	test	M00844	COE1_sp002358575,COE1_sp009774375,Clostridia,Lawsonibacter	0.5	6	1	1
C1-unit interconversion, prokaryotes	0.875003	0.349574	0.749087	control	M00140	COE1_sp002358575,COE1_sp009774375,Clostridia	0.5	6	0	1
Citrate cycle, second carbon oxidation, 2-oxoglutarate => oxaloacetate	0.875003	0.349574	0.749087	control	M00011	Alistipes_sp009774895,UBA7173_sp001689485,UBA7173_sp002491305	0.5	6	0	1
CMP-KDO biosynthesis	0.875003	0.349574	0.749087	control	M00063	Alistipes_sp009774895,UBA7173_sp001689485,UBA7173_sp002491305	0.5	6	0	1
Cysteine biosynthesis, serine => cysteine	0.875003	0.349574	0.749087	test	M00021	COE1_sp002358575,COE1_sp009774375,Clostridia,Lawsonibacter	0.5	6	1	1
D-Glucuronate degradation, D-glucuronate => pyruvate + D-glyceraldehyde 3P	0.875003	0.349574	0.749087	test	M00061	COE1_sp002358575,COE1_sp009774375,Clostridia,Lawsonibacter	0.5	6	1	1
Galactose degradation, Leloir pathway, galactose => alpha-D-glucose-1P	0.875003	0.349574	0.749087	control	M00632	Alistipes_sp009774895,Clostridia,UBA7173_sp001689485	0.5	6	0	1
Glycogen biosynthesis, glucose-1P => glycogen/starch	0.875003	0.349574	0.749087	test	M00854	COE1_sp002358575,COE1_sp009774375,Clostridia,Lawsonibacter	0.5	6	1	1
Histidine biosynthesis, PRPP => histidine	0.875003	0.349574	0.749087	test	M00026	COE1_sp002358575,COE1_sp009774375,Clostridia,Lawsonibacter	0.5	6	1	1
Histidine degradation, histidine => N-formiminoglutamate => glutamate	0.875003	0.349574	0.749087	test	M00045	Alistipes_sp009774895,Lawsonibacter,UBA7173_sp001689485,UBA7173_sp002491305	0.5	6	1	1
Isoleucine biosynthesis, threonine => 2-oxobutanoate => isoleucine	0.875003	0.349574	0.749087	test	M00570	COE1_sp002358575,COE1_sp009774375,Clostridia,Lawsonibacter	0.5	6	1	1
KDO2-lipid A biosynthesis, Raetz pathway, non-LpxL-LpxM type	0.875003	0.349574	0.749087	control	M00866	Alistipes_sp009774895,UBA7173_sp001689485,UBA7173_sp002491305	0.5	6	0	1
Leucine biosynthesis, 2-oxoisovalerate => 2-oxoisocaproate	0.875003	0.349574	0.749087	control	M00432	COE1_sp002358575,COE1_sp009774375,Clostridia	0.5	6	0	1
Lysine biosynthesis, DAP dehydrogenase pathway, aspartate => lysine	0.875003	0.349574	0.749087	test	M00526	COE1_sp002358575,COE1_sp009774375,Clostridia,Lawsonibacter	0.5	6	1	1
Lysine biosynthesis, succinyl-DAP pathway, aspartate => lysine	0.875003	0.349574	0.749087	test	M00016	COE1_sp002358575,COE1_sp009774375,Clostridia,Lawsonibacter	0.5	6	1	1
Ornithine biosynthesis, glutamate => ornithine	0.875003	0.349574	0.749087	test	M00028	COE1_sp002358575,COE1_sp009774375,Clostridia,Lawsonibacter	0.5	6	1	1
Pantothenate biosynthesis, valine/L-aspartate => pantothenate	0.875003	0.349574	0.749087	control	M00119	Alistipes_sp009774895,UBA7173_sp001689485,UBA7173_sp002491305	0.5	6	0	1
Phosphatidylethanolamine (PE) biosynthesis, PA => PS => PE	0.875003	0.349574	0.749087	control	M00093	Alistipes_sp009774895,UBA7173_sp001689485,UBA7173_sp002491305	0.5	6	0	1
Proline biosynthesis, glutamate => proline	0.875003	0.349574	0.749087	test	M00015	COE1_sp002358575,COE1_sp009774375,Clostridia,Lawsonibacter	0.5	6	1	1
Propanoyl-CoA metabolism, propanoyl-CoA => succinyl-CoA	0.875003	0.349574	0.749087	control	M00741	Alistipes_sp009774895,UBA7173_sp001689485,UBA7173_sp002491305	0.5	6	0	1
Semi-phosphorylative Entner-Doudoroff pathway, gluconate => glycerate-3P	0.875003	0.349574	0.749087	test	M00308	COE1_sp002358575,COE1_sp009774375,Clostridia,Lawsonibacter	0.5	6	1	1
Succinate dehydrogenase, prokaryotes	0.875003	0.349574	0.749087	control	M00149	Alistipes_sp009774895,UBA7173_sp001689485,UBA7173_sp002491305	0.5	6	0	1
Threonine biosynthesis, aspartate => homoserine => threonine	0.875003	0.349574	0.749087	test	M00018	COE1_sp002358575,COE1_sp009774375,Clostridia,Lawsonibacter	0.5	6	1	1
UDP-N-acetyl-D-glucosamine biosynthesis, prokaryotes, glucose => UDP-GlcNAc	0.875003	0.349574	0.749087	test	M00909	COE1_sp002358575,COE1_sp009774375,Clostridia,Lawsonibacter	0.5	6	1	1
Valine/isoleucine biosynthesis, pyruvate => valine / 2-oxobutanoate => isoleucine	0.875003	0.349574	0.749087	test	M00019	COE1_sp002358575,COE1_sp009774375,Clostridia,Lawsonibacter	0.5	6	1	1
beta-Lactam resistance, Bla system	0.466678	0.494519	0.77255	control	M00627	UBA7173_sp001689485,UBA7173_sp002491305	0.333333	6	0	1
Biotin biosynthesis, BioW pathway, pimelate => pimeloyl-CoA => biotin	0.466678	0.494519	0.77255	control	M00577	UBA7173_sp001689485,UBA7173_sp002491305	0.333333	6	0	1
Biotin biosynthesis, pimeloyl-ACP/CoA => biotin	0.466678	0.494519	0.77255	control	M00123	UBA7173_sp001689485,UBA7173_sp002491305	0.333333	6	0	1
Fatty acid biosynthesis, initiation	0.466678	0.494519	0.77255	control	M00082	COE1_sp002358575,COE1_sp009774375	0.333333	6	0	1
KDO2-lipid A biosynthesis, Raetz pathway, LpxL-LpxM type	0.466678	0.494519	0.77255	control	M00060	Alistipes_sp009774895,UBA7173_sp001689485	0.333333	6	0	1
Multidrug resistance, efflux pump MepA	0.466678	0.494519	0.77255	control	M00705	COE1_sp002358575,COE1_sp009774375	0.333333	6	0	1
Tryptophan biosynthesis, chorismate => tryptophan	0.466678	0.494519	0.77255	control	M00023	COE1_sp002358575,COE1_sp009774375	0.333333	6	0	1
Vancomycin resistance, D-Ala-D-Ser type	0.466678	0.494519	0.77255	control	M00652	COE1_sp002358575,COE1_sp009774375	0.333333	6	0	1
Acylglycerol degradation	0.194445	0.659243	0.77255	control	M00098	Clostridia	0.166667	6	0	1
ADP-L-glycero-D-manno-heptose biosynthesis	0.194445	0.659243	0.77255	control	M00064	COE1_sp002358575	0.166667	6	0	1
CAM (Crassulacean acid metabolism), light	0.194445	0.659243	0.77255	control	M00169	UBA7173_sp002491305	0.166667	6	0	1
Lipoic acid biosynthesis, eukaryotes, octanoyl-ACP => dihydrolipoyl-H	0.194445	0.659243	0.77255	control	M00882	Alistipes_sp009774895	0.166667	6	0	1
Lipoic acid biosynthesis, plants and bacteria, octanoyl-ACP => dihydrolipoyl-E2/H	0.194445	0.659243	0.77255	control	M00881	Alistipes_sp009774895	0.166667	6	0	1
Menaquinone biosynthesis, futalosine pathway	0.194445	0.659243	0.77255	control	M00930	Alistipes_sp009774895	0.166667	6	0	1
Menaquinone biosynthesis, modified futalosine pathway	0.194445	0.659243	0.77255	control	M00931	Alistipes_sp009774895	0.166667	6	0	1
NADH:quinone oxidoreductase, prokaryotes	0.194445	0.659243	0.77255	control	M00144	UBA7173_sp001689485	0.166667	6	0	1
Pentose phosphate pathway (Pentose phosphate cycle)	0.194445	0.659243	0.77255	control	M00004	COE1_sp009774375	0.166667	6	0	1
Phosphate acetyltransferase-acetate kinase pathway, acetyl-CoA => acetate	0.194445	0.659243	0.77255	control	M00579	COE1_sp002358575	0.166667	6	0	1
Pimeloyl-ACP biosynthesis, BioC-BioH pathway, malonyl-ACP => pimeloyl-ACP	0.194445	0.659243	0.77255	control	M00572	UBA7173_sp001689485	0.166667	6	0	1
Polyamine biosynthesis, arginine => agmatine => putrescine => spermidine	0.194445	0.659243	0.77255	control	M00133	COE1_sp009774375	0.166667	6	0	1
Pyrimidine ribonucleotide biosynthesis, UMP => UDP/UTP,CDP/CTP	0.194445	0.659243	0.77255	control	M00052	UBA7173_sp001689485	0.166667	6	0	1
Reductive pentose phosphate cycle, glyceraldehyde-3P => ribulose-5P	0.194445	0.659243	0.77255	control	M00167	Alistipes_sp009774895	0.166667	6	0	1
Riboflavin biosynthesis, plants and bacteria, GTP => riboflavin/FMN/FAD	0.194445	0.659243	0.77255	control	M00125	UBA7173_sp001689485	0.166667	6	0	1
Adenine ribonucleotide biosynthesis, IMP => ADP,ATP	0.194445	0.659243	0.77255	test	M00049	Alistipes_sp009774895,COE1_sp002358575,COE1_sp009774375,Clostridia,Lawsonibacter,UBA7173_sp001689485	0.833333	6	1	1
F-type ATPase, prokaryotes and chloroplasts	0.194445	0.659243	0.77255	test	M00157	COE1_sp002358575,COE1_sp009774375,Clostridia,Lawsonibacter,UBA7173_sp001689485,UBA7173_sp002491305	0.833333	6	1	1
Glycogen degradation, glycogen => glucose-6P	0.194445	0.659243	0.77255	test	M00855	COE1_sp002358575,COE1_sp009774375,Clostridia,Lawsonibacter,UBA7173_sp001689485,UBA7173_sp002491305	0.833333	6	1	1
Lysine biosynthesis, DAP aminotransferase pathway, aspartate => lysine	0.194445	0.659243	0.77255	test	M00527	COE1_sp002358575,COE1_sp009774375,Clostridia,Lawsonibacter,UBA7173_sp001689485,UBA7173_sp002491305	0.833333	6	1	1
Pyruvate oxidation, pyruvate => acetyl-CoA	0.194445	0.659243	0.77255	test	M00307	Alistipes_sp009774895,COE1_sp002358575,COE1_sp009774375,Lawsonibacter,UBA7173_sp001689485,UBA7173_sp002491305	0.833333	6	1	1
Serine biosynthesis, glycerate-3P => serine	0.194445	0.659243	0.77255	test	M00020	Alistipes_sp009774895,COE1_sp002358575,COE1_sp009774375,Lawsonibacter,UBA7173_sp001689485,UBA7173_sp002491305	0.833333	6	1	1
C5 isoprenoid biosynthesis, non-mevalonate pathway	0	1	1	NA	M00096	Alistipes_sp009774895,COE1_sp002358575,COE1_sp009774375,Clostridia,Lawsonibacter,UBA7173_sp001689485,UBA7173_sp002491305	1	6	1	1
Coenzyme A biosynthesis, pantothenate => CoA	0	1	1	NA	M00120	Alistipes_sp009774895,COE1_sp002358575,COE1_sp009774375,Clostridia,Lawsonibacter,UBA7173_sp001689485,UBA7173_sp002491305	1	6	1	1
Gluconeogenesis, oxaloacetate => fructose-6P	0	1	1	NA	M00003	Alistipes_sp009774895,COE1_sp002358575,COE1_sp009774375,Clostridia,Lawsonibacter,UBA7173_sp001689485,UBA7173_sp002491305	1	6	1	1
Glycolysis (Embden-Meyerhof pathway), glucose => pyruvate	0	1	1	NA	M00001	Alistipes_sp009774895,COE1_sp002358575,COE1_sp009774375,Clostridia,Lawsonibacter,UBA7173_sp001689485,UBA7173_sp002491305	1	6	1	1
Glycolysis, core module involving three-carbon compounds	0	1	1	NA	M00002	Alistipes_sp009774895,COE1_sp002358575,COE1_sp009774375,Clostridia,Lawsonibacter,UBA7173_sp001689485,UBA7173_sp002491305	1	6	1	1
Guanine ribonucleotide biosynthesis IMP => GDP,GTP	0	1	1	NA	M00050	Alistipes_sp009774895,COE1_sp002358575,COE1_sp009774375,Clostridia,Lawsonibacter,UBA7173_sp001689485,UBA7173_sp002491305	1	6	1	1
Inosine monophosphate biosynthesis, PRPP + glutamine => IMP	0	1	1	NA	M00048	Alistipes_sp009774895,COE1_sp002358575,COE1_sp009774375,Clostridia,Lawsonibacter,UBA7173_sp001689485,UBA7173_sp002491305	1	6	1	1
Pentose phosphate pathway, non-oxidative phase, fructose 6P => ribose 5P	0	1	1	NA	M00007	Alistipes_sp009774895,COE1_sp002358575,COE1_sp009774375,Clostridia,Lawsonibacter,UBA7173_sp001689485,UBA7173_sp002491305	1	6	1	1
PRPP biosynthesis, ribose 5P => PRPP	0	1	1	NA	M00005	Alistipes_sp009774895,COE1_sp002358575,COE1_sp009774375,Clostridia,Lawsonibacter,UBA7173_sp001689485,UBA7173_sp002491305	1	6	1	1
Shikimate pathway, phosphoenolpyruvate + erythrose-4P => chorismate	0	1	1	NA	M00022	Alistipes_sp009774895,COE1_sp002358575,COE1_sp009774375,Clostridia,Lawsonibacter,UBA7173_sp001689485,UBA7173_sp002491305	1	6	1	1
Uridine monophosphate biosynthesis, glutamine (+ PRPP) => UMP	0	1	1	NA	M00051	Alistipes_sp009774895,COE1_sp002358575,COE1_sp009774375,Clostridia,Lawsonibacter,UBA7173_sp001689485,UBA7173_sp002491305	1	6	1	1

## Sheet: UBA7173_sp001689485-enriched
KEGG_MODULE	enrichment_score	unadjusted_p_value	adjusted_q_value	associated_groups	accession	sample_ids	p_control	N_control	p_test	N_test
NADH:quinone oxidoreductase, prokaryotes	7.00002	0.00815089	0.152829	test	M00144	UBA7173_sp001689485	0	6	1	1
Pimeloyl-ACP biosynthesis, BioC-BioH pathway, malonyl-ACP => pimeloyl-ACP	7.00002	0.00815089	0.152829	test	M00572	UBA7173_sp001689485	0	6	1	1
Pyrimidine ribonucleotide biosynthesis, UMP => UDP/UTP,CDP/CTP	7.00002	0.00815089	0.152829	test	M00052	UBA7173_sp001689485	0	6	1	1
Riboflavin biosynthesis, plants and bacteria, GTP => riboflavin/FMN/FAD	7.00002	0.00815089	0.152829	test	M00125	UBA7173_sp001689485	0	6	1	1
beta-Lactam resistance, Bla system	2.91667	0.0876688	0.530787	test	M00627	UBA7173_sp001689485,UBA7173_sp002491305	0.166667	6	1	1
Biotin biosynthesis, BioW pathway, pimelate => pimeloyl-CoA => biotin	2.91667	0.0876688	0.530787	test	M00577	UBA7173_sp001689485,UBA7173_sp002491305	0.166667	6	1	1
Biotin biosynthesis, pimeloyl-ACP/CoA => biotin	2.91667	0.0876688	0.530787	test	M00123	UBA7173_sp001689485,UBA7173_sp002491305	0.166667	6	1	1
KDO2-lipid A biosynthesis, Raetz pathway, LpxL-LpxM type	2.91667	0.0876688	0.530787	test	M00060	Alistipes_sp009774895,UBA7173_sp001689485	0.166667	6	1	1
Arginine biosynthesis, ornithine => arginine	1.55557	0.212315	0.530787	control	M00844	COE1_sp002358575,COE1_sp009774375,Clostridia,Lawsonibacter	0.666667	6	0	1
Cysteine biosynthesis, serine => cysteine	1.55557	0.212315	0.530787	control	M00021	COE1_sp002358575,COE1_sp009774375,Clostridia,Lawsonibacter	0.666667	6	0	1
D-Glucuronate degradation, D-glucuronate => pyruvate + D-glyceraldehyde 3P	1.55557	0.212315	0.530787	control	M00061	COE1_sp002358575,COE1_sp009774375,Clostridia,Lawsonibacter	0.666667	6	0	1
Glycogen biosynthesis, glucose-1P => glycogen/starch	1.55557	0.212315	0.530787	control	M00854	COE1_sp002358575,COE1_sp009774375,Clostridia,Lawsonibacter	0.666667	6	0	1
Histidine biosynthesis, PRPP => histidine	1.55557	0.212315	0.530787	control	M00026	COE1_sp002358575,COE1_sp009774375,Clostridia,Lawsonibacter	0.666667	6	0	1
Isoleucine biosynthesis, threonine => 2-oxobutanoate => isoleucine	1.55557	0.212315	0.530787	control	M00570	COE1_sp002358575,COE1_sp009774375,Clostridia,Lawsonibacter	0.666667	6	0	1
Lysine biosynthesis, DAP dehydrogenase pathway, aspartate => lysine	1.55557	0.212315	0.530787	control	M00526	COE1_sp002358575,COE1_sp009774375,Clostridia,Lawsonibacter	0.666667	6	0	1
Lysine biosynthesis, succinyl-DAP pathway, aspartate => lysine	1.55557	0.212315	0.530787	control	M00016	COE1_sp002358575,COE1_sp009774375,Clostridia,Lawsonibacter	0.666667	6	0	1
Ornithine biosynthesis, glutamate => ornithine	1.55557	0.212315	0.530787	control	M00028	COE1_sp002358575,COE1_sp009774375,Clostridia,Lawsonibacter	0.666667	6	0	1
Proline biosynthesis, glutamate => proline	1.55557	0.212315	0.530787	control	M00015	COE1_sp002358575,COE1_sp009774375,Clostridia,Lawsonibacter	0.666667	6	0	1
Semi-phosphorylative Entner-Doudoroff pathway, gluconate => glycerate-3P	1.55557	0.212315	0.530787	control	M00308	COE1_sp002358575,COE1_sp009774375,Clostridia,Lawsonibacter	0.666667	6	0	1
Threonine biosynthesis, aspartate => homoserine => threonine	1.55557	0.212315	0.530787	control	M00018	COE1_sp002358575,COE1_sp009774375,Clostridia,Lawsonibacter	0.666667	6	0	1
UDP-N-acetyl-D-glucosamine biosynthesis, prokaryotes, glucose => UDP-GlcNAc	1.55557	0.212315	0.530787	control	M00909	COE1_sp002358575,COE1_sp009774375,Clostridia,Lawsonibacter	0.666667	6	0	1
Valine/isoleucine biosynthesis, pyruvate => valine / 2-oxobutanoate => isoleucine	1.55557	0.212315	0.530787	control	M00019	COE1_sp002358575,COE1_sp009774375,Clostridia,Lawsonibacter	0.666667	6	0	1
Citrate cycle, second carbon oxidation, 2-oxoglutarate => oxaloacetate	1.55557	0.212315	0.530787	test	M00011	Alistipes_sp009774895,UBA7173_sp001689485,UBA7173_sp002491305	0.333333	6	1	1
CMP-KDO biosynthesis	1.55557	0.212315	0.530787	test	M00063	Alistipes_sp009774895,UBA7173_sp001689485,UBA7173_sp002491305	0.333333	6	1	1
Galactose degradation, Leloir pathway, galactose => alpha-D-glucose-1P	1.55557	0.212315	0.530787	test	M00632	Alistipes_sp009774895,Clostridia,UBA7173_sp001689485	0.333333	6	1	1
KDO2-lipid A biosynthesis, Raetz pathway, non-LpxL-LpxM type	1.55557	0.212315	0.530787	test	M00866	Alistipes_sp009774895,UBA7173_sp001689485,UBA7173_sp002491305	0.333333	6	1	1
Pantothenate biosynthesis, valine/L-aspartate => pantothenate	1.55557	0.212315	0.530787	test	M00119	Alistipes_sp009774895,UBA7173_sp001689485,UBA7173_sp002491305	0.333333	6	1	1
Phosphatidylethanolamine (PE) biosynthesis, PA => PS => PE	1.55557	0.212315	0.530787	test	M00093	Alistipes_sp009774895,UBA7173_sp001689485,UBA7173_sp002491305	0.333333	6	1	1
Propanoyl-CoA metabolism, propanoyl-CoA => succinyl-CoA	1.55557	0.212315	0.530787	test	M00741	Alistipes_sp009774895,UBA7173_sp001689485,UBA7173_sp002491305	0.333333	6	1	1
Succinate dehydrogenase, prokaryotes	1.55557	0.212315	0.530787	test	M00149	Alistipes_sp009774895,UBA7173_sp001689485,UBA7173_sp002491305	0.333333	6	1	1
C1-unit interconversion, prokaryotes	0.875003	0.349574	0.749087	control	M00140	COE1_sp002358575,COE1_sp009774375,Clostridia	0.5	6	0	1
D-Galacturonate degradation (bacteria), D-galacturonate => pyruvate + D-glyceraldehyde 3P	0.875003	0.349574	0.749087	control	M00631	COE1_sp002358575,COE1_sp009774375,Lawsonibacter	0.5	6	0	1
Histidine degradation, histidine => N-formiminoglutamate => glutamate	0.875003	0.349574	0.749087	test	M00045	Alistipes_sp009774895,Lawsonibacter,UBA7173_sp001689485,UBA7173_sp002491305	0.5	6	1	1
Leucine biosynthesis, 2-oxoisovalerate => 2-oxoisocaproate	0.875003	0.349574	0.749087	control	M00432	COE1_sp002358575,COE1_sp009774375,Clostridia	0.5	6	0	1
Tetrahydrofolate biosynthesis, GTP => THF	0.875003	0.349574	0.749087	test	M00126	Alistipes_sp009774895,Clostridia,UBA7173_sp001689485,UBA7173_sp002491305	0.5	6	1	1
NAD biosynthesis, aspartate => quinolinate => NAD	0.466678	0.494519	0.77255	test	M00115	Alistipes_sp009774895,COE1_sp002358575,COE1_sp009774375,UBA7173_sp001689485,UBA7173_sp002491305	0.666667	6	1	1
Fatty acid biosynthesis, initiation	0.466678	0.494519	0.77255	control	M00082	COE1_sp002358575,COE1_sp009774375	0.333333	6	0	1
Methionine biosynthesis, apartate => homoserine => methionine	0.466678	0.494519	0.77255	control	M00017	Clostridia,Lawsonibacter	0.333333	6	0	1
Multidrug resistance, efflux pump MepA	0.466678	0.494519	0.77255	control	M00705	COE1_sp002358575,COE1_sp009774375	0.333333	6	0	1
Tryptophan biosynthesis, chorismate => tryptophan	0.466678	0.494519	0.77255	control	M00023	COE1_sp002358575,COE1_sp009774375	0.333333	6	0	1
Vancomycin resistance, D-Ala-D-Ser type	0.466678	0.494519	0.77255	control	M00652	COE1_sp002358575,COE1_sp009774375	0.333333	6	0	1
Acylglycerol degradation	0.194445	0.659243	0.77255	control	M00098	Clostridia	0.166667	6	0	1
ADP-L-glycero-D-manno-heptose biosynthesis	0.194445	0.659243	0.77255	control	M00064	COE1_sp002358575	0.166667	6	0	1
CAM (Crassulacean acid metabolism), light	0.194445	0.659243	0.77255	control	M00169	UBA7173_sp002491305	0.166667	6	0	1
Lipoic acid biosynthesis, eukaryotes, octanoyl-ACP => dihydrolipoyl-H	0.194445	0.659243	0.77255	control	M00882	Alistipes_sp009774895	0.166667	6	0	1
Lipoic acid biosynthesis, plants and bacteria, octanoyl-ACP => dihydrolipoyl-E2/H	0.194445	0.659243	0.77255	control	M00881	Alistipes_sp009774895	0.166667	6	0	1
Menaquinone biosynthesis, futalosine pathway	0.194445	0.659243	0.77255	control	M00930	Alistipes_sp009774895	0.166667	6	0	1
Menaquinone biosynthesis, modified futalosine pathway	0.194445	0.659243	0.77255	control	M00931	Alistipes_sp009774895	0.166667	6	0	1
Methionine degradation	0.194445	0.659243	0.77255	control	M00035	Lawsonibacter	0.166667	6	0	1
Pentose phosphate pathway (Pentose phosphate cycle)	0.194445	0.659243	0.77255	control	M00004	COE1_sp009774375	0.166667	6	0	1
Phosphate acetyltransferase-acetate kinase pathway, acetyl-CoA => acetate	0.194445	0.659243	0.77255	control	M00579	COE1_sp002358575	0.166667	6	0	1
Polyamine biosynthesis, arginine => agmatine => putrescine => spermidine	0.194445	0.659243	0.77255	control	M00133	COE1_sp009774375	0.166667	6	0	1
Reductive pentose phosphate cycle, glyceraldehyde-3P => ribulose-5P	0.194445	0.659243	0.77255	control	M00167	Alistipes_sp009774895	0.166667	6	0	1
Thiamine salvage pathway, HMP/HET => TMP	0.194445	0.659243	0.77255	control	M00899	Lawsonibacter	0.166667	6	0	1
V/A-type ATPase, prokaryotes	0.194445	0.659243	0.77255	control	M00159	Lawsonibacter	0.166667	6	0	1
Adenine ribonucleotide biosynthesis, IMP => ADP,ATP	0.194445	0.659243	0.77255	test	M00049	Alistipes_sp009774895,COE1_sp002358575,COE1_sp009774375,Clostridia,Lawsonibacter,UBA7173_sp001689485	0.833333	6	1	1
beta-Oxidation, acyl-CoA synthesis	0.194445	0.659243	0.77255	test	M00086	Alistipes_sp009774895,COE1_sp002358575,COE1_sp009774375,Clostridia,UBA7173_sp001689485,UBA7173_sp002491305	0.833333	6	1	1
dTDP-L-rhamnose biosynthesis	0.194445	0.659243	0.77255	test	M00793	Alistipes_sp009774895,COE1_sp002358575,COE1_sp009774375,Clostridia,UBA7173_sp001689485,UBA7173_sp002491305	0.833333	6	1	1
F-type ATPase, prokaryotes and chloroplasts	0.194445	0.659243	0.77255	test	M00157	COE1_sp002358575,COE1_sp009774375,Clostridia,Lawsonibacter,UBA7173_sp001689485,UBA7173_sp002491305	0.833333	6	1	1
Fatty acid biosynthesis, elongation	0.194445	0.659243	0.77255	test	M00083	Alistipes_sp009774895,COE1_sp002358575,COE1_sp009774375,Clostridia,UBA7173_sp001689485,UBA7173_sp002491305	0.833333	6	1	1
Glycogen degradation, glycogen => glucose-6P	0.194445	0.659243	0.77255	test	M00855	COE1_sp002358575,COE1_sp009774375,Clostridia,Lawsonibacter,UBA7173_sp001689485,UBA7173_sp002491305	0.833333	6	1	1
Lysine biosynthesis, DAP aminotransferase pathway, aspartate => lysine	0.194445	0.659243	0.77255	test	M00527	COE1_sp002358575,COE1_sp009774375,Clostridia,Lawsonibacter,UBA7173_sp001689485,UBA7173_sp002491305	0.833333	6	1	1
Pyruvate oxidation, pyruvate => acetyl-CoA	0.194445	0.659243	0.77255	test	M00307	Alistipes_sp009774895,COE1_sp002358575,COE1_sp009774375,Lawsonibacter,UBA7173_sp001689485,UBA7173_sp002491305	0.833333	6	1	1
Serine biosynthesis, glycerate-3P => serine	0.194445	0.659243	0.77255	test	M00020	Alistipes_sp009774895,COE1_sp002358575,COE1_sp009774375,Lawsonibacter,UBA7173_sp001689485,UBA7173_sp002491305	0.833333	6	1	1
C5 isoprenoid biosynthesis, non-mevalonate pathway	0	1	1	NA	M00096	Alistipes_sp009774895,COE1_sp002358575,COE1_sp009774375,Clostridia,Lawsonibacter,UBA7173_sp001689485,UBA7173_sp002491305	1	6	1	1
Coenzyme A biosynthesis, pantothenate => CoA	0	1	1	NA	M00120	Alistipes_sp009774895,COE1_sp002358575,COE1_sp009774375,Clostridia,Lawsonibacter,UBA7173_sp001689485,UBA7173_sp002491305	1	6	1	1
Gluconeogenesis, oxaloacetate => fructose-6P	0	1	1	NA	M00003	Alistipes_sp009774895,COE1_sp002358575,COE1_sp009774375,Clostridia,Lawsonibacter,UBA7173_sp001689485,UBA7173_sp002491305	1	6	1	1
Glycolysis (Embden-Meyerhof pathway), glucose => pyruvate	0	1	1	NA	M00001	Alistipes_sp009774895,COE1_sp002358575,COE1_sp009774375,Clostridia,Lawsonibacter,UBA7173_sp001689485,UBA7173_sp002491305	1	6	1	1
Glycolysis, core module involving three-carbon compounds	0	1	1	NA	M00002	Alistipes_sp009774895,COE1_sp002358575,COE1_sp009774375,Clostridia,Lawsonibacter,UBA7173_sp001689485,UBA7173_sp002491305	1	6	1	1
Guanine ribonucleotide biosynthesis IMP => GDP,GTP	0	1	1	NA	M00050	Alistipes_sp009774895,COE1_sp002358575,COE1_sp009774375,Clostridia,Lawsonibacter,UBA7173_sp001689485,UBA7173_sp002491305	1	6	1	1
Inosine monophosphate biosynthesis, PRPP + glutamine => IMP	0	1	1	NA	M00048	Alistipes_sp009774895,COE1_sp002358575,COE1_sp009774375,Clostridia,Lawsonibacter,UBA7173_sp001689485,UBA7173_sp002491305	1	6	1	1
Pentose phosphate pathway, non-oxidative phase, fructose 6P => ribose 5P	0	1	1	NA	M00007	Alistipes_sp009774895,COE1_sp002358575,COE1_sp009774375,Clostridia,Lawsonibacter,UBA7173_sp001689485,UBA7173_sp002491305	1	6	1	1
PRPP biosynthesis, ribose 5P => PRPP	0	1	1	NA	M00005	Alistipes_sp009774895,COE1_sp002358575,COE1_sp009774375,Clostridia,Lawsonibacter,UBA7173_sp001689485,UBA7173_sp002491305	1	6	1	1
Shikimate pathway, phosphoenolpyruvate + erythrose-4P => chorismate	0	1	1	NA	M00022	Alistipes_sp009774895,COE1_sp002358575,COE1_sp009774375,Clostridia,Lawsonibacter,UBA7173_sp001689485,UBA7173_sp002491305	1	6	1	1
Uridine monophosphate biosynthesis, glutamine (+ PRPP) => UMP	0	1	1	NA	M00051	Alistipes_sp009774895,COE1_sp002358575,COE1_sp009774375,Clostridia,Lawsonibacter,UBA7173_sp001689485,UBA7173_sp002491305	1	6	1	1

## Sheet: UBA7173_sp002491305-enriched
KEGG_MODULE	enrichment_score	unadjusted_p_value	adjusted_q_value	associated_groups	accession	sample_ids	p_control	N_control	p_test	N_test
Adenine ribonucleotide biosynthesis, IMP => ADP,ATP	7.00002	0.00815089	0.305659	control	M00049	Alistipes_sp009774895,COE1_sp002358575,COE1_sp009774375,Clostridia,Lawsonibacter,UBA7173_sp001689485	1	6	0	1
CAM (Crassulacean acid metabolism), light	7.00002	0.00815089	0.305659	test	M00169	UBA7173_sp002491305	0	6	1	1
beta-Lactam resistance, Bla system	2.91667	0.0876688	0.612447	test	M00627	UBA7173_sp001689485,UBA7173_sp002491305	0.166667	6	1	1
Biotin biosynthesis, BioW pathway, pimelate => pimeloyl-CoA => biotin	2.91667	0.0876688	0.612447	test	M00577	UBA7173_sp001689485,UBA7173_sp002491305	0.166667	6	1	1
Biotin biosynthesis, pimeloyl-ACP/CoA => biotin	2.91667	0.0876688	0.612447	test	M00123	UBA7173_sp001689485,UBA7173_sp002491305	0.166667	6	1	1
Arginine biosynthesis, ornithine => arginine	1.55557	0.212315	0.612447	control	M00844	COE1_sp002358575,COE1_sp009774375,Clostridia,Lawsonibacter	0.666667	6	0	1
Cysteine biosynthesis, serine => cysteine	1.55557	0.212315	0.612447	control	M00021	COE1_sp002358575,COE1_sp009774375,Clostridia,Lawsonibacter	0.666667	6	0	1
D-Glucuronate degradation, D-glucuronate => pyruvate + D-glyceraldehyde 3P	1.55557	0.212315	0.612447	control	M00061	COE1_sp002358575,COE1_sp009774375,Clostridia,Lawsonibacter	0.666667	6	0	1
Glycogen biosynthesis, glucose-1P => glycogen/starch	1.55557	0.212315	0.612447	control	M00854	COE1_sp002358575,COE1_sp009774375,Clostridia,Lawsonibacter	0.666667	6	0	1
Histidine biosynthesis, PRPP => histidine	1.55557	0.212315	0.612447	control	M00026	COE1_sp002358575,COE1_sp009774375,Clostridia,Lawsonibacter	0.666667	6	0	1
Isoleucine biosynthesis, threonine => 2-oxobutanoate => isoleucine	1.55557	0.212315	0.612447	control	M00570	COE1_sp002358575,COE1_sp009774375,Clostridia,Lawsonibacter	0.666667	6	0	1
Lysine biosynthesis, DAP dehydrogenase pathway, aspartate => lysine	1.55557	0.212315	0.612447	control	M00526	COE1_sp002358575,COE1_sp009774375,Clostridia,Lawsonibacter	0.666667	6	0	1
Lysine biosynthesis, succinyl-DAP pathway, aspartate => lysine	1.55557	0.212315	0.612447	control	M00016	COE1_sp002358575,COE1_sp009774375,Clostridia,Lawsonibacter	0.666667	6	0	1
Ornithine biosynthesis, glutamate => ornithine	1.55557	0.212315	0.612447	control	M00028	COE1_sp002358575,COE1_sp009774375,Clostridia,Lawsonibacter	0.666667	6	0	1
Proline biosynthesis, glutamate => proline	1.55557	0.212315	0.612447	control	M00015	COE1_sp002358575,COE1_sp009774375,Clostridia,Lawsonibacter	0.666667	6	0	1
Semi-phosphorylative Entner-Doudoroff pathway, gluconate => glycerate-3P	1.55557	0.212315	0.612447	control	M00308	COE1_sp002358575,COE1_sp009774375,Clostridia,Lawsonibacter	0.666667	6	0	1
Threonine biosynthesis, aspartate => homoserine => threonine	1.55557	0.212315	0.612447	control	M00018	COE1_sp002358575,COE1_sp009774375,Clostridia,Lawsonibacter	0.666667	6	0	1
UDP-N-acetyl-D-glucosamine biosynthesis, prokaryotes, glucose => UDP-GlcNAc	1.55557	0.212315	0.612447	control	M00909	COE1_sp002358575,COE1_sp009774375,Clostridia,Lawsonibacter	0.666667	6	0	1
Valine/isoleucine biosynthesis, pyruvate => valine / 2-oxobutanoate => isoleucine	1.55557	0.212315	0.612447	control	M00019	COE1_sp002358575,COE1_sp009774375,Clostridia,Lawsonibacter	0.666667	6	0	1
Citrate cycle, second carbon oxidation, 2-oxoglutarate => oxaloacetate	1.55557	0.212315	0.612447	test	M00011	Alistipes_sp009774895,UBA7173_sp001689485,UBA7173_sp002491305	0.333333	6	1	1
CMP-KDO biosynthesis	1.55557	0.212315	0.612447	test	M00063	Alistipes_sp009774895,UBA7173_sp001689485,UBA7173_sp002491305	0.333333	6	1	1
KDO2-lipid A biosynthesis, Raetz pathway, non-LpxL-LpxM type	1.55557	0.212315	0.612447	test	M00866	Alistipes_sp009774895,UBA7173_sp001689485,UBA7173_sp002491305	0.333333	6	1	1
Pantothenate biosynthesis, valine/L-aspartate => pantothenate	1.55557	0.212315	0.612447	test	M00119	Alistipes_sp009774895,UBA7173_sp001689485,UBA7173_sp002491305	0.333333	6	1	1
Phosphatidylethanolamine (PE) biosynthesis, PA => PS => PE	1.55557	0.212315	0.612447	test	M00093	Alistipes_sp009774895,UBA7173_sp001689485,UBA7173_sp002491305	0.333333	6	1	1
Propanoyl-CoA metabolism, propanoyl-CoA => succinyl-CoA	1.55557	0.212315	0.612447	test	M00741	Alistipes_sp009774895,UBA7173_sp001689485,UBA7173_sp002491305	0.333333	6	1	1
Succinate dehydrogenase, prokaryotes	1.55557	0.212315	0.612447	test	M00149	Alistipes_sp009774895,UBA7173_sp001689485,UBA7173_sp002491305	0.333333	6	1	1
C1-unit interconversion, prokaryotes	0.875003	0.349574	0.77255	control	M00140	COE1_sp002358575,COE1_sp009774375,Clostridia	0.5	6	0	1
D-Galacturonate degradation (bacteria), D-galacturonate => pyruvate + D-glyceraldehyde 3P	0.875003	0.349574	0.77255	control	M00631	COE1_sp002358575,COE1_sp009774375,Lawsonibacter	0.5	6	0	1
Galactose degradation, Leloir pathway, galactose => alpha-D-glucose-1P	0.875003	0.349574	0.77255	control	M00632	Alistipes_sp009774895,Clostridia,UBA7173_sp001689485	0.5	6	0	1
Histidine degradation, histidine => N-formiminoglutamate => glutamate	0.875003	0.349574	0.77255	test	M00045	Alistipes_sp009774895,Lawsonibacter,UBA7173_sp001689485,UBA7173_sp002491305	0.5	6	1	1
Leucine biosynthesis, 2-oxoisovalerate => 2-oxoisocaproate	0.875003	0.349574	0.77255	control	M00432	COE1_sp002358575,COE1_sp009774375,Clostridia	0.5	6	0	1
Tetrahydrofolate biosynthesis, GTP => THF	0.875003	0.349574	0.77255	test	M00126	Alistipes_sp009774895,Clostridia,UBA7173_sp001689485,UBA7173_sp002491305	0.5	6	1	1
NAD biosynthesis, aspartate => quinolinate => NAD	0.466678	0.494519	0.77255	test	M00115	Alistipes_sp009774895,COE1_sp002358575,COE1_sp009774375,UBA7173_sp001689485,UBA7173_sp002491305	0.666667	6	1	1
Fatty acid biosynthesis, initiation	0.466678	0.494519	0.77255	control	M00082	COE1_sp002358575,COE1_sp009774375	0.333333	6	0	1
KDO2-lipid A biosynthesis, Raetz pathway, LpxL-LpxM type	0.466678	0.494519	0.77255	control	M00060	Alistipes_sp009774895,UBA7173_sp001689485	0.333333	6	0	1
Methionine biosynthesis, apartate => homoserine => methionine	0.466678	0.494519	0.77255	control	M00017	Clostridia,Lawsonibacter	0.333333	6	0	1
Multidrug resistance, efflux pump MepA	0.466678	0.494519	0.77255	control	M00705	COE1_sp002358575,COE1_sp009774375	0.333333	6	0	1
Tryptophan biosynthesis, chorismate => tryptophan	0.466678	0.494519	0.77255	control	M00023	COE1_sp002358575,COE1_sp009774375	0.333333	6	0	1
Vancomycin resistance, D-Ala-D-Ser type	0.466678	0.494519	0.77255	control	M00652	COE1_sp002358575,COE1_sp009774375	0.333333	6	0	1
Acylglycerol degradation	0.194445	0.659243	0.77255	control	M00098	Clostridia	0.166667	6	0	1
ADP-L-glycero-D-manno-heptose biosynthesis	0.194445	0.659243	0.77255	control	M00064	COE1_sp002358575	0.166667	6	0	1
Lipoic acid biosynthesis, eukaryotes, octanoyl-ACP => dihydrolipoyl-H	0.194445	0.659243	0.77255	control	M00882	Alistipes_sp009774895	0.166667	6	0	1
Lipoic acid biosynthesis, plants and bacteria, octanoyl-ACP => dihydrolipoyl-E2/H	0.194445	0.659243	0.77255	control	M00881	Alistipes_sp009774895	0.166667	6	0	1
Menaquinone biosynthesis, futalosine pathway	0.194445	0.659243	0.77255	control	M00930	Alistipes_sp009774895	0.166667	6	0	1
Menaquinone biosynthesis, modified futalosine pathway	0.194445	0.659243	0.77255	control	M00931	Alistipes_sp009774895	0.166667	6	0	1
Methionine degradation	0.194445	0.659243	0.77255	control	M00035	Lawsonibacter	0.166667	6	0	1
NADH:quinone oxidoreductase, prokaryotes	0.194445	0.659243	0.77255	control	M00144	UBA7173_sp001689485	0.166667	6	0	1
Pentose phosphate pathway (Pentose phosphate cycle)	0.194445	0.659243	0.77255	control	M00004	COE1_sp009774375	0.166667	6	0	1
Phosphate acetyltransferase-acetate kinase pathway, acetyl-CoA => acetate	0.194445	0.659243	0.77255	control	M00579	COE1_sp002358575	0.166667	6	0	1
Pimeloyl-ACP biosynthesis, BioC-BioH pathway, malonyl-ACP => pimeloyl-ACP	0.194445	0.659243	0.77255	control	M00572	UBA7173_sp001689485	0.166667	6	0	1
Polyamine biosynthesis, arginine => agmatine => putrescine => spermidine	0.194445	0.659243	0.77255	control	M00133	COE1_sp009774375	0.166667	6	0	1
Pyrimidine ribonucleotide biosynthesis, UMP => UDP/UTP,CDP/CTP	0.194445	0.659243	0.77255	control	M00052	UBA7173_sp001689485	0.166667	6	0	1
Reductive pentose phosphate cycle, glyceraldehyde-3P => ribulose-5P	0.194445	0.659243	0.77255	control	M00167	Alistipes_sp009774895	0.166667	6	0	1
Riboflavin biosynthesis, plants and bacteria, GTP => riboflavin/FMN/FAD	0.194445	0.659243	0.77255	control	M00125	UBA7173_sp001689485	0.166667	6	0	1
Thiamine salvage pathway, HMP/HET => TMP	0.194445	0.659243	0.77255	control	M00899	Lawsonibacter	0.166667	6	0	1
V/A-type ATPase, prokaryotes	0.194445	0.659243	0.77255	control	M00159	Lawsonibacter	0.166667	6	0	1
beta-Oxidation, acyl-CoA synthesis	0.194445	0.659243	0.77255	test	M00086	Alistipes_sp009774895,COE1_sp002358575,COE1_sp009774375,Clostridia,UBA7173_sp001689485,UBA7173_sp002491305	0.833333	6	1	1
dTDP-L-rhamnose biosynthesis	0.194445	0.659243	0.77255	test	M00793	Alistipes_sp009774895,COE1_sp002358575,COE1_sp009774375,Clostridia,UBA7173_sp001689485,UBA7173_sp002491305	0.833333	6	1	1
F-type ATPase, prokaryotes and chloroplasts	0.194445	0.659243	0.77255	test	M00157	COE1_sp002358575,COE1_sp009774375,Clostridia,Lawsonibacter,UBA7173_sp001689485,UBA7173_sp002491305	0.833333	6	1	1
Fatty acid biosynthesis, elongation	0.194445	0.659243	0.77255	test	M00083	Alistipes_sp009774895,COE1_sp002358575,COE1_sp009774375,Clostridia,UBA7173_sp001689485,UBA7173_sp002491305	0.833333	6	1	1
Glycogen degradation, glycogen => glucose-6P	0.194445	0.659243	0.77255	test	M00855	COE1_sp002358575,COE1_sp009774375,Clostridia,Lawsonibacter,UBA7173_sp001689485,UBA7173_sp002491305	0.833333	6	1	1
Lysine biosynthesis, DAP aminotransferase pathway, aspartate => lysine	0.194445	0.659243	0.77255	test	M00527	COE1_sp002358575,COE1_sp009774375,Clostridia,Lawsonibacter,UBA7173_sp001689485,UBA7173_sp002491305	0.833333	6	1	1
Pyruvate oxidation, pyruvate => acetyl-CoA	0.194445	0.659243	0.77255	test	M00307	Alistipes_sp009774895,COE1_sp002358575,COE1_sp009774375,Lawsonibacter,UBA7173_sp001689485,UBA7173_sp002491305	0.833333	6	1	1
Serine biosynthesis, glycerate-3P => serine	0.194445	0.659243	0.77255	test	M00020	Alistipes_sp009774895,COE1_sp002358575,COE1_sp009774375,Lawsonibacter,UBA7173_sp001689485,UBA7173_sp002491305	0.833333	6	1	1
C5 isoprenoid biosynthesis, non-mevalonate pathway	0	1	1	NA	M00096	Alistipes_sp009774895,COE1_sp002358575,COE1_sp009774375,Clostridia,Lawsonibacter,UBA7173_sp001689485,UBA7173_sp002491305	1	6	1	1
Coenzyme A biosynthesis, pantothenate => CoA	0	1	1	NA	M00120	Alistipes_sp009774895,COE1_sp002358575,COE1_sp009774375,Clostridia,Lawsonibacter,UBA7173_sp001689485,UBA7173_sp002491305	1	6	1	1
Gluconeogenesis, oxaloacetate => fructose-6P	0	1	1	NA	M00003	Alistipes_sp009774895,COE1_sp002358575,COE1_sp009774375,Clostridia,Lawsonibacter,UBA7173_sp001689485,UBA7173_sp002491305	1	6	1	1
Glycolysis (Embden-Meyerhof pathway), glucose => pyruvate	0	1	1	NA	M00001	Alistipes_sp009774895,COE1_sp002358575,COE1_sp009774375,Clostridia,Lawsonibacter,UBA7173_sp001689485,UBA7173_sp002491305	1	6	1	1
Glycolysis, core module involving three-carbon compounds	0	1	1	NA	M00002	Alistipes_sp009774895,COE1_sp002358575,COE1_sp009774375,Clostridia,Lawsonibacter,UBA7173_sp001689485,UBA7173_sp002491305	1	6	1	1
Guanine ribonucleotide biosynthesis IMP => GDP,GTP	0	1	1	NA	M00050	Alistipes_sp009774895,COE1_sp002358575,COE1_sp009774375,Clostridia,Lawsonibacter,UBA7173_sp001689485,UBA7173_sp002491305	1	6	1	1
Inosine monophosphate biosynthesis, PRPP + glutamine => IMP	0	1	1	NA	M00048	Alistipes_sp009774895,COE1_sp002358575,COE1_sp009774375,Clostridia,Lawsonibacter,UBA7173_sp001689485,UBA7173_sp002491305	1	6	1	1
Pentose phosphate pathway, non-oxidative phase, fructose 6P => ribose 5P	0	1	1	NA	M00007	Alistipes_sp009774895,COE1_sp002358575,COE1_sp009774375,Clostridia,Lawsonibacter,UBA7173_sp001689485,UBA7173_sp002491305	1	6	1	1
PRPP biosynthesis, ribose 5P => PRPP	0	1	1	NA	M00005	Alistipes_sp009774895,COE1_sp002358575,COE1_sp009774375,Clostridia,Lawsonibacter,UBA7173_sp001689485,UBA7173_sp002491305	1	6	1	1
Shikimate pathway, phosphoenolpyruvate + erythrose-4P => chorismate	0	1	1	NA	M00022	Alistipes_sp009774895,COE1_sp002358575,COE1_sp009774375,Clostridia,Lawsonibacter,UBA7173_sp001689485,UBA7173_sp002491305	1	6	1	1
Uridine monophosphate biosynthesis, glutamine (+ PRPP) => UMP	0	1	1	NA	M00051	Alistipes_sp009774895,COE1_sp002358575,COE1_sp009774375,Clostridia,Lawsonibacter,UBA7173_sp001689485,UBA7173_sp002491305	1	6	1	1

## Sheet: heatmap
	Alistipes_sp009774895	COE1_sp002358575	COE1_sp009774375	Clostridia	Lawsonibacter	UBA7173_sp001689485	UBA7173_sp002491305
F-type ATPase, prokaryotes and chloroplasts	0	1	1	1	1	1	1
Glycogen degradation, glycogen => glucose-6P	0	1	1	1	1	1	1
Lysine biosynthesis, DAP aminotransferase pathway, aspartate => lysine	0	1	1	1	1	1	1
Lipoic acid biosynthesis, eukaryotes, octanoyl-ACP => dihydrolipoyl-H	1	0	0	0	0	0	0
Lipoic acid biosynthesis, plants and bacteria, octanoyl-ACP => dihydrolipoyl-E2/H	1	0	0	0	0	0	0
Menaquinone biosynthesis, futalosine pathway	1	0	0	0	0	0	0
Menaquinone biosynthesis, modified futalosine pathway	1	0	0	0	0	0	0
Reductive pentose phosphate cycle, glyceraldehyde-3P => ribulose-5P	1	0	0	0	0	0	0
