# Supplementary material for: Degenerative Cervical Myelopathy induces sex-specific dysbiosis in mice
Source: Front Microbiol. 2023 Oct 20;14:1229783. doi: 10.3389/fmicb.2023.1229783 (PMC10623434; doi:10.3389/fmicb.2023.1229783)
Supplement: Supplementary file 7 [file Table_7.XLSX]

## Sheet: male-metagenome-metabolism_kofa
unique_id	bin_name	db_name	ko	gene_caller_id	contig	modules_with_ko	ko_definition
0	Acetatifactor_sp011959105	Acetatifactor_sp011959105	K00134	35480	NODE_493_length_36152_cov_12_277004	M00001,M00002,M00003,M00308,M00552,M00165,M00166,M00611,M00612	glyceraldehyde 3-phosphate dehydrogenase [EC:1.2.1.12]
1	Acetatifactor_sp011959105	Acetatifactor_sp011959105	K01810	10765	NODE_38_length_136065_cov_13_341416	M00001,M00004,M00892,M00909	glucose-6-phosphate isomerase [EC:5.3.1.9]
2	Acetatifactor_sp011959105	Acetatifactor_sp011959105	K00873	14485	NODE_15_length_192602_cov_15_584621	M00001,M00002,M00049,M00050	pyruvate kinase [EC:2.7.1.40]
3	Acetatifactor_sp011959105	Acetatifactor_sp011959105	K01624	16892	NODE_252_length_57645_cov_14_428165	M00001,M00003,M00165,M00167,M00345,M00344,M00611,M00612	fructose-bisphosphate aldolase, class II [EC:4.1.2.13]
4	Acetatifactor_sp011959105	Acetatifactor_sp011959105	K01803	35478	NODE_493_length_36152_cov_12_277004	M00001,M00002,M00003	triosephosphate isomerase (TIM) [EC:5.3.1.1]
5	Acetatifactor_sp011959105	Acetatifactor_sp011959105	K00850	20159	NODE_13_length_205171_cov_15_453119	M00001,M00345	6-phosphofructokinase 1 [EC:2.7.1.11]
6	Acetatifactor_sp011959105	Acetatifactor_sp011959105	K15633	5320	NODE_1317_length_16298_cov_13_782614	M00001,M00002,M00003	2,3-bisphosphoglycerate-independent phosphoglycerate mutase [EC:5.4.2.12]
7	Acetatifactor_sp011959105	Acetatifactor_sp011959105	K01689	25801	NODE_185_length_69401_cov_11_534349	M00001,M00002,M00003,M00346	enolase [EC:4.2.1.11]
8	Acetatifactor_sp011959105	Acetatifactor_sp011959105	K21071	39003	NODE_3029_length_8603_cov_15_888863	M00001	ATP-dependent phosphofructokinase / diphosphate-dependent phosphofructokinase [EC:2.7.1.11 2.7.1.90]
9	Acetatifactor_sp011959105	Acetatifactor_sp011959105	K21071	77	NODE_61_length_118937_cov_14_458236	M00001	ATP-dependent phosphofructokinase / diphosphate-dependent phosphofructokinase [EC:2.7.1.11 2.7.1.90]
10	Acetatifactor_sp011959105	Acetatifactor_sp011959105	K00845	34208	NODE_368_length_45170_cov_13_660911	M00001,M00549,M00892,M00909	glucokinase [EC:2.7.1.2]
11	Acetatifactor_sp011959105	Acetatifactor_sp011959105	K00845	19126	NODE_215_length_63614_cov_15_223509	M00001,M00549,M00892,M00909	glucokinase [EC:2.7.1.2]
12	Acetatifactor_sp011959105	Acetatifactor_sp011959105	K00845	16886	NODE_252_length_57645_cov_14_428165	M00001,M00549,M00892,M00909	glucokinase [EC:2.7.1.2]
13	Acetatifactor_sp011959105	Acetatifactor_sp011959105	K00927	35479	NODE_493_length_36152_cov_12_277004	M00001,M00002,M00003,M00308,M00552,M00165,M00166,M00611,M00612	phosphoglycerate kinase [EC:2.7.2.3]
14	Acetatifactor_sp011959105	Acetatifactor_sp011959105	K01610	28524	NODE_130_length_83251_cov_13_260974	M00003,M00170	phosphoenolpyruvate carboxykinase (ATP) [EC:4.1.1.49]
15	Acetatifactor_sp011959105	Acetatifactor_sp011959105	K00170	1187	NODE_35_length_142391_cov_15_490389	M00307,M00173,M00374,M00620,M00614	pyruvate ferredoxin oxidoreductase beta subunit [EC:1.2.7.1]
16	Acetatifactor_sp011959105	Acetatifactor_sp011959105	K00169	1186	NODE_35_length_142391_cov_15_490389	M00307,M00173,M00374,M00620,M00614	pyruvate ferredoxin oxidoreductase alpha subunit [EC:1.2.7.1]
17	Acetatifactor_sp011959105	Acetatifactor_sp011959105	K00171	1185	NODE_35_length_142391_cov_15_490389	M00307,M00173,M00374,M00620,M00614	pyruvate ferredoxin oxidoreductase delta subunit [EC:1.2.7.1]
18	Acetatifactor_sp011959105	Acetatifactor_sp011959105	K00172	1184	NODE_35_length_142391_cov_15_490389	M00307,M00173,M00374,M00620,M00614	pyruvate ferredoxin oxidoreductase gamma subunit [EC:1.2.7.1]
19	Acetatifactor_sp011959105	Acetatifactor_sp011959105	K00031	10797	NODE_38_length_136065_cov_13_341416	M00009,M00010,M00740,M00173,M00614	isocitrate dehydrogenase [EC:1.1.1.42]
20	Acetatifactor_sp011959105	Acetatifactor_sp011959105	K01647	28528	NODE_130_length_83251_cov_13_260974	M00009,M00010,M00012,M00740	citrate synthase [EC:2.3.3.1]
21	Acetatifactor_sp011959105	Acetatifactor_sp011959105	K01678	21665	NODE_204_length_65612_cov_16_144515	M00009,M00011,M00173,M00374,M00620,M00613,M00614	fumarate hydratase subunit beta [EC:4.2.1.2]
22	Acetatifactor_sp011959105	Acetatifactor_sp011959105	K01677	21666	NODE_204_length_65612_cov_16_144515	M00009,M00011,M00173,M00374,M00620,M00613,M00614	fumarate hydratase subunit alpha [EC:4.2.1.2]
23	Acetatifactor_sp011959105	Acetatifactor_sp011959105	K05942	10799	NODE_38_length_136065_cov_13_341416	M00009,M00010	citrate (Re)-synthase [EC:2.3.3.3]
24	Acetatifactor_sp011959105	Acetatifactor_sp011959105	K01783	14443	NODE_15_length_192602_cov_15_584621	M00004,M00007	ribulose-phosphate 3-epimerase [EC:5.1.3.1]
25	Acetatifactor_sp011959105	Acetatifactor_sp011959105	K07404	10809	NODE_38_length_136065_cov_13_341416	M00004,M00006,M00008	6-phosphogluconolactonase [EC:3.1.1.31]
26	Acetatifactor_sp011959105	Acetatifactor_sp011959105	K01808	17980	NODE_30_length_149858_cov_15_556724	M00004,M00007,M00165,M00167,M00611,M00612	ribose 5-phosphate isomerase B [EC:5.3.1.6]
27	Acetatifactor_sp011959105	Acetatifactor_sp011959105	K00615	8346	NODE_132_length_82334_cov_15_986473	M00004,M00007,M00165,M00167,M00611,M00612	transketolase [EC:2.2.1.1]
28	Acetatifactor_sp011959105	Acetatifactor_sp011959105	K00615	14445	NODE_15_length_192602_cov_15_584621	M00004,M00007,M00165,M00167,M00611,M00612	transketolase [EC:2.2.1.1]
29	Acetatifactor_sp011959105	Acetatifactor_sp011959105	K00615	14446	NODE_15_length_192602_cov_15_584621	M00004,M00007,M00165,M00167,M00611,M00612	transketolase [EC:2.2.1.1]
30	Acetatifactor_sp011959105	Acetatifactor_sp011959105	K00616	16900	NODE_1051_length_19798_cov_13_901281	M00004,M00007	transaldolase [EC:2.2.1.2]
31	Acetatifactor_sp011959105	Acetatifactor_sp011959105	K00948	18005	NODE_30_length_149858_cov_15_556724	M00005	ribose-phosphate pyrophosphokinase [EC:2.7.6.1]
32	Acetatifactor_sp011959105	Acetatifactor_sp011959105	K00948	39941	NODE_235_length_60330_cov_12_494185	M00005	ribose-phosphate pyrophosphokinase [EC:2.7.6.1]
33	Acetatifactor_sp011959105	Acetatifactor_sp011959105	K01625	9578	NODE_234_length_60341_cov_12_095578	M00008,M00308,M00631,M00061	2-dehydro-3-deoxyphosphogluconate aldolase / (4S)-4-hydroxy-2-oxoglutarate aldolase [EC:4.1.2.14 4.1.3.42]
34	Acetatifactor_sp011959105	Acetatifactor_sp011959105	K00874	9577	NODE_234_length_60341_cov_12_095578	M00308,M00631,M00061	2-dehydro-3-deoxygluconokinase [EC:2.7.1.45]
35	Acetatifactor_sp011959105	Acetatifactor_sp011959105	K00874	18014	NODE_30_length_149858_cov_15_556724	M00308,M00631,M00061	2-dehydro-3-deoxygluconokinase [EC:2.7.1.45]
36	Acetatifactor_sp011959105	Acetatifactor_sp011959105	K00854	31417	NODE_94_length_96797_cov_15_169771	M00014	xylulokinase [EC:2.7.1.17]
37	Acetatifactor_sp011959105	Acetatifactor_sp011959105	K01812	24139	NODE_220_length_62708_cov_13_080475	M00631,M00061	glucuronate isomerase [EC:5.3.1.12]
38	Acetatifactor_sp011959105	Acetatifactor_sp011959105	K01685	24136	NODE_220_length_62708_cov_13_080475	M00631	altronate hydrolase [EC:4.2.1.7]
39	Acetatifactor_sp011959105	Acetatifactor_sp011959105	K00041	24137	NODE_220_length_62708_cov_13_080475	M00631	tagaturonate reductase [EC:1.1.1.58]
40	Acetatifactor_sp011959105	Acetatifactor_sp011959105	K00040	24124	NODE_220_length_62708_cov_13_080475	M00061	fructuronate reductase [EC:1.1.1.57]
41	Acetatifactor_sp011959105	Acetatifactor_sp011959105	K01686	24123	NODE_220_length_62708_cov_13_080475	M00061	mannonate dehydratase [EC:4.2.1.8]
42	Acetatifactor_sp011959105	Acetatifactor_sp011959105	K01051	32116	NODE_114_length_91042_cov_14_159297	M00081	pectinesterase [EC:3.1.1.11]
43	Acetatifactor_sp011959105	Acetatifactor_sp011959105	K01785	16871	NODE_252_length_57645_cov_14_428165	M00632	aldose 1-epimerase [EC:5.1.3.3]
44	Acetatifactor_sp011959105	Acetatifactor_sp011959105	K01785	39007	NODE_3029_length_8603_cov_15_888863	M00632	aldose 1-epimerase [EC:5.1.3.3]
45	Acetatifactor_sp011959105	Acetatifactor_sp011959105	K00849	1151	NODE_35_length_142391_cov_15_490389	M00632,M00554	galactokinase [EC:2.7.1.6]
46	Acetatifactor_sp011959105	Acetatifactor_sp011959105	K01784	20171	NODE_13_length_205171_cov_15_453119	M00632	UDP-glucose 4-epimerase [EC:5.1.3.2]
47	Acetatifactor_sp011959105	Acetatifactor_sp011959105	K01809	15587	NODE_164_length_73312_cov_12_071474	M00114	mannose-6-phosphate isomerase [EC:5.3.1.8]
48	Acetatifactor_sp011959105	Acetatifactor_sp011959105	K03077	14447	NODE_15_length_192602_cov_15_584621	M00550	L-ribulose-5-phosphate 4-epimerase [EC:5.1.3.4]
49	Acetatifactor_sp011959105	Acetatifactor_sp011959105	K03079	24133	NODE_220_length_62708_cov_13_080475	M00550	L-ribulose-5-phosphate 3-epimerase [EC:5.1.3.22]
50	Acetatifactor_sp011959105	Acetatifactor_sp011959105	K00975	18009	NODE_30_length_149858_cov_15_556724	M00854,M00565	glucose-1-phosphate adenylyltransferase [EC:2.7.7.27]
51	Acetatifactor_sp011959105	Acetatifactor_sp011959105	K00975	18010	NODE_30_length_149858_cov_15_556724	M00854,M00565	glucose-1-phosphate adenylyltransferase [EC:2.7.7.27]
52	Acetatifactor_sp011959105	Acetatifactor_sp011959105	K00975	17956	NODE_30_length_149858_cov_15_556724	M00854,M00565	glucose-1-phosphate adenylyltransferase [EC:2.7.7.27]
53	Acetatifactor_sp011959105	Acetatifactor_sp011959105	K00975	17957	NODE_30_length_149858_cov_15_556724	M00854,M00565	glucose-1-phosphate adenylyltransferase [EC:2.7.7.27]
54	Acetatifactor_sp011959105	Acetatifactor_sp011959105	K00703	14491	NODE_827_length_23923_cov_13_399698	M00854,M00565	starch synthase [EC:2.4.1.21]
55	Acetatifactor_sp011959105	Acetatifactor_sp011959105	K00700	28497	NODE_130_length_83251_cov_13_260974	M00854,M00565	1,4-alpha-glucan branching enzyme [EC:2.4.1.18]
56	Acetatifactor_sp011959105	Acetatifactor_sp011959105	K00700	21685	NODE_204_length_65612_cov_16_144515	M00854,M00565	1,4-alpha-glucan branching enzyme [EC:2.4.1.18]
57	Acetatifactor_sp011959105	Acetatifactor_sp011959105	K01200	13469	NODE_41_length_132337_cov_18_822122	M00855	pullulanase [EC:3.2.1.41]
58	Acetatifactor_sp011959105	Acetatifactor_sp011959105	K01200	28527	NODE_130_length_83251_cov_13_260974	M00855	pullulanase [EC:3.2.1.41]
59	Acetatifactor_sp011959105	Acetatifactor_sp011959105	K00705	38126	NODE_180_length_70124_cov_13_959511	M00855	4-alpha-glucanotransferase [EC:2.4.1.25]
60	Acetatifactor_sp011959105	Acetatifactor_sp011959105	K01835	14345	NODE_15_length_192602_cov_15_584621	M00855,M00549	phosphoglucomutase [EC:5.4.2.2]
61	Acetatifactor_sp011959105	Acetatifactor_sp011959105	K00688	18036	NODE_30_length_149858_cov_15_556724	M00855	glycogen phosphorylase [EC:2.4.1.1]
62	Acetatifactor_sp011959105	Acetatifactor_sp011959105	K00688	38125	NODE_180_length_70124_cov_13_959511	M00855	glycogen phosphorylase [EC:2.4.1.1]
63	Acetatifactor_sp011959105	Acetatifactor_sp011959105	K00972	20172	NODE_13_length_205171_cov_15_453119	M00892	UDP-N-acetylglucosamine/UDP-N-acetylgalactosamine diphosphorylase [EC:2.7.7.23 2.7.7.83]
64	Acetatifactor_sp011959105	Acetatifactor_sp011959105	K00820	14338	NODE_15_length_192602_cov_15_584621	M00892,M00909	glutamine---fructose-6-phosphate transaminase (isomerizing) [EC:2.6.1.16]
65	Acetatifactor_sp011959105	Acetatifactor_sp011959105	K03431	14384	NODE_15_length_192602_cov_15_584621	M00909	phosphoglucosamine mutase [EC:5.4.2.10]
66	Acetatifactor_sp011959105	Acetatifactor_sp011959105	K00626	6206	NODE_167_length_73020_cov_15_007798	M00373,M00375,M00374,M00088,M00095,M00849	acetyl-CoA C-acetyltransferase [EC:2.3.1.9]
67	Acetatifactor_sp011959105	Acetatifactor_sp011959105	K00600	4	NODE_61_length_118937_cov_14_458236	M00532,M00346,M00140,M00141	glycine hydroxymethyltransferase [EC:2.1.2.1]
68	Acetatifactor_sp011959105	Acetatifactor_sp011959105	K00248	6209	NODE_167_length_73020_cov_15_007798	M00013	butyryl-CoA dehydrogenase [EC:1.3.8.1]
69	Acetatifactor_sp011959105	Acetatifactor_sp011959105	K01006	8278	NODE_320_length_49611_cov_17_172270	M00169,M00172,M00171,M00173,M00614	pyruvate, orthophosphate dikinase [EC:2.7.9.1]
70	Acetatifactor_sp011959105	Acetatifactor_sp011959105	K01963	1130	NODE_35_length_142391_cov_15_490389	M00376,M00082,M00613	acetyl-CoA carboxylase carboxyl transferase subunit beta [EC:6.4.1.2 2.1.3.15]
71	Acetatifactor_sp011959105	Acetatifactor_sp011959105	K01962	1130	NODE_35_length_142391_cov_15_490389	M00376,M00082,M00613	acetyl-CoA carboxylase carboxyl transferase subunit alpha [EC:6.4.1.2 2.1.3.15]
72	Acetatifactor_sp011959105	Acetatifactor_sp011959105	K01491	10784	NODE_38_length_136065_cov_13_341416	M00377,M00140,M00618	methylenetetrahydrofolate dehydrogenase (NADP+) / methenyltetrahydrofolate cyclohydrolase [EC:1.5.1.5 3.5.4.9]
73	Acetatifactor_sp011959105	Acetatifactor_sp011959105	K01938	10785	NODE_38_length_136065_cov_13_341416	M00377,M00140,M00618	formate--tetrahydrofolate ligase [EC:6.3.4.3]
74	Acetatifactor_sp011959105	Acetatifactor_sp011959105	K00297	39936	NODE_235_length_60330_cov_12_494185	M00377,M00618	methylenetetrahydrofolate reductase (NADPH) [EC:1.5.1.20]
75	Acetatifactor_sp011959105	Acetatifactor_sp011959105	K00925	33294	NODE_240_length_59686_cov_12_128574	M00579,M00357,M00617,M00618	acetate kinase [EC:2.7.2.1]
76	Acetatifactor_sp011959105	Acetatifactor_sp011959105	K00018	1235	NODE_35_length_142391_cov_15_490389	M00346	glycerate dehydrogenase [EC:1.1.1.29]
77	Acetatifactor_sp011959105	Acetatifactor_sp011959105	K02109	17989	NODE_30_length_149858_cov_15_556724	M00157	F-type H+-transporting ATPase subunit b
78	Acetatifactor_sp011959105	Acetatifactor_sp011959105	K02114	17994	NODE_30_length_149858_cov_15_556724	M00157	F-type H+-transporting ATPase subunit epsilon
79	Acetatifactor_sp011959105	Acetatifactor_sp011959105	K02110	17988	NODE_30_length_149858_cov_15_556724	M00157	F-type H+-transporting ATPase subunit c
80	Acetatifactor_sp011959105	Acetatifactor_sp011959105	K02113	17990	NODE_30_length_149858_cov_15_556724	M00157	F-type H+-transporting ATPase subunit delta
81	Acetatifactor_sp011959105	Acetatifactor_sp011959105	K02112	17993	NODE_30_length_149858_cov_15_556724	M00157	F-type H+/Na+-transporting ATPase subunit beta [EC:7.1.2.2 7.2.2.1]
82	Acetatifactor_sp011959105	Acetatifactor_sp011959105	K02108	17987	NODE_30_length_149858_cov_15_556724	M00157	F-type H+-transporting ATPase subunit a
83	Acetatifactor_sp011959105	Acetatifactor_sp011959105	K02111	17991	NODE_30_length_149858_cov_15_556724	M00157	F-type H+/Na+-transporting ATPase subunit alpha [EC:7.1.2.2 7.2.2.1]
84	Acetatifactor_sp011959105	Acetatifactor_sp011959105	K02115	17992	NODE_30_length_149858_cov_15_556724	M00157	F-type H+-transporting ATPase subunit gamma
85	Acetatifactor_sp011959105	Acetatifactor_sp011959105	K00645	1126	NODE_35_length_142391_cov_15_490389	M00082,M00873,M00874	[acyl-carrier-protein] S-malonyltransferase [EC:2.3.1.39]
86	Acetatifactor_sp011959105	Acetatifactor_sp011959105	K00648	1131	NODE_35_length_142391_cov_15_490389	M00082	3-oxoacyl-[acyl-carrier-protein] synthase III [EC:2.3.1.180]
87	Acetatifactor_sp011959105	Acetatifactor_sp011959105	K00059	15602	NODE_164_length_73312_cov_12_071474	M00083,M00874,M00572	3-oxoacyl-[acyl-carrier protein] reductase [EC:1.1.1.100]
88	Acetatifactor_sp011959105	Acetatifactor_sp011959105	K00059	36334	NODE_213_length_64308_cov_13_756245	M00083,M00874,M00572	3-oxoacyl-[acyl-carrier protein] reductase [EC:1.1.1.100]
89	Acetatifactor_sp011959105	Acetatifactor_sp011959105	K00059	1127	NODE_35_length_142391_cov_15_490389	M00083,M00874,M00572	3-oxoacyl-[acyl-carrier protein] reductase [EC:1.1.1.100]
90	Acetatifactor_sp011959105	Acetatifactor_sp011959105	K02371	1125	NODE_35_length_142391_cov_15_490389	M00083	enoyl-[acyl-carrier protein] reductase II [EC:1.3.1.9]
91	Acetatifactor_sp011959105	Acetatifactor_sp011959105	K02372	1129	NODE_35_length_142391_cov_15_490389	M00083,M00572	3-hydroxyacyl-[acyl-carrier-protein] dehydratase [EC:4.2.1.59]
92	Acetatifactor_sp011959105	Acetatifactor_sp011959105	K09458	1128	NODE_35_length_142391_cov_15_490389	M00083,M00873,M00874,M00572	3-oxoacyl-[acyl-carrier-protein] synthase II [EC:2.3.1.179]
93	Acetatifactor_sp011959105	Acetatifactor_sp011959105	K01692	6207	NODE_167_length_73020_cov_15_007798	M00087,M00878	enoyl-CoA hydratase [EC:4.2.1.17]
94	Acetatifactor_sp011959105	Acetatifactor_sp011959105	K00249	6209	NODE_167_length_73020_cov_15_007798	M00087,M00036	acyl-CoA dehydrogenase [EC:1.3.8.7]
95	Acetatifactor_sp011959105	Acetatifactor_sp011959105	K00655	1133	NODE_35_length_142391_cov_15_490389	M00089	1-acyl-sn-glycerol-3-phosphate acyltransferase [EC:2.3.1.51]
96	Acetatifactor_sp011959105	Acetatifactor_sp011959105	K00655	18047	NODE_30_length_149858_cov_15_556724	M00089	1-acyl-sn-glycerol-3-phosphate acyltransferase [EC:2.3.1.51]
97	Acetatifactor_sp011959105	Acetatifactor_sp011959105	K01046	26779	NODE_271_length_55077_cov_12_571444	M00098	triacylglycerol lipase [EC:3.1.1.3]
98	Acetatifactor_sp011959105	Acetatifactor_sp011959105	K01046	34198	NODE_368_length_45170_cov_13_660911	M00098	triacylglycerol lipase [EC:3.1.1.3]
99	Acetatifactor_sp011959105	Acetatifactor_sp011959105	K00981	111	NODE_298_length_51759_cov_14_301466	M00093	phosphatidate cytidylyltransferase [EC:2.7.7.41]
100	Acetatifactor_sp011959105	Acetatifactor_sp011959105	K12349	20113	NODE_13_length_205171_cov_15_453119	M00099	neutral ceramidase [EC:3.5.1.23]
101	Acetatifactor_sp011959105	Acetatifactor_sp011959105	K01933	16907	NODE_1051_length_19798_cov_13_901281	M00048	phosphoribosylformylglycinamidine cyclo-ligase [EC:6.3.3.1]
102	Acetatifactor_sp011959105	Acetatifactor_sp011959105	K00764	13403	NODE_41_length_132337_cov_18_822122	M00048	amidophosphoribosyltransferase [EC:2.4.2.14]
103	Acetatifactor_sp011959105	Acetatifactor_sp011959105	K00764	6223	NODE_167_length_73020_cov_15_007798	M00048	amidophosphoribosyltransferase [EC:2.4.2.14]
104	Acetatifactor_sp011959105	Acetatifactor_sp011959105	K00602	7304	NODE_207_length_65192_cov_17_114190	M00048	phosphoribosylaminoimidazolecarboxamide formyltransferase / IMP cyclohydrolase [EC:2.1.2.3 3.5.4.10]
105	Acetatifactor_sp011959105	Acetatifactor_sp011959105	K01952	34211	NODE_368_length_45170_cov_13_660911	M00048	phosphoribosylformylglycinamidine synthase [EC:6.3.5.3]
106	Acetatifactor_sp011959105	Acetatifactor_sp011959105	K01588	16906	NODE_1051_length_19798_cov_13_901281	M00048	5-(carboxyamino)imidazole ribonucleotide mutase [EC:5.4.99.18]
107	Acetatifactor_sp011959105	Acetatifactor_sp011959105	K11176	7305	NODE_207_length_65192_cov_17_114190	M00048	IMP cyclohydrolase [EC:3.5.4.10]
108	Acetatifactor_sp011959105	Acetatifactor_sp011959105	K11175	16908	NODE_1051_length_19798_cov_13_901281	M00048	phosphoribosylglycinamide formyltransferase 1 [EC:2.1.2.2]
109	Acetatifactor_sp011959105	Acetatifactor_sp011959105	K01756	6222	NODE_167_length_73020_cov_15_007798	M00048,M00049	adenylosuccinate lyase [EC:4.3.2.2]
110	Acetatifactor_sp011959105	Acetatifactor_sp011959105	K01945	16909	NODE_1051_length_19798_cov_13_901281	M00048	phosphoribosylamine---glycine ligase [EC:6.3.4.13]
111	Acetatifactor_sp011959105	Acetatifactor_sp011959105	K00939	9382	NODE_21_length_173674_cov_16_583087	M00049	adenylate kinase [EC:2.7.4.3]
112	Acetatifactor_sp011959105	Acetatifactor_sp011959105	K01939	6224	NODE_167_length_73020_cov_15_007798	M00049	adenylosuccinate synthase [EC:6.3.4.4]
113	Acetatifactor_sp011959105	Acetatifactor_sp011959105	K01951	7252	NODE_207_length_65192_cov_17_114190	M00050	GMP synthase (glutamine-hydrolysing) [EC:6.3.5.2]
114	Acetatifactor_sp011959105	Acetatifactor_sp011959105	K01951	7278	NODE_207_length_65192_cov_17_114190	M00050	GMP synthase (glutamine-hydrolysing) [EC:6.3.5.2]
115	Acetatifactor_sp011959105	Acetatifactor_sp011959105	K00942	35501	NODE_493_length_36152_cov_12_277004	M00050	guanylate kinase [EC:2.7.4.8]
116	Acetatifactor_sp011959105	Acetatifactor_sp011959105	K00088	7307	NODE_207_length_65192_cov_17_114190	M00050	IMP dehydrogenase [EC:1.1.1.205]
117	Acetatifactor_sp011959105	Acetatifactor_sp011959105	K17828	18051	NODE_30_length_149858_cov_15_556724	M00051	dihydroorotate dehydrogenase (NAD+) catalytic subunit [EC:1.3.1.14]
118	Acetatifactor_sp011959105	Acetatifactor_sp011959105	K01955	13401	NODE_41_length_132337_cov_18_822122	M00051	carbamoyl-phosphate synthase large subunit [EC:6.3.5.5]
119	Acetatifactor_sp011959105	Acetatifactor_sp011959105	K01955	34204	NODE_368_length_45170_cov_13_660911	M00051	carbamoyl-phosphate synthase large subunit [EC:6.3.5.5]
120	Acetatifactor_sp011959105	Acetatifactor_sp011959105	K00762	7220	NODE_637_length_28929_cov_14_935721	M00051	orotate phosphoribosyltransferase [EC:2.4.2.10]
121	Acetatifactor_sp011959105	Acetatifactor_sp011959105	K00762	16902	NODE_1051_length_19798_cov_13_901281	M00051	orotate phosphoribosyltransferase [EC:2.4.2.10]
122	Acetatifactor_sp011959105	Acetatifactor_sp011959105	K00610	15599	NODE_164_length_73312_cov_12_071474	M00051	aspartate carbamoyltransferase regulatory subunit
123	Acetatifactor_sp011959105	Acetatifactor_sp011959105	K01591	19162	NODE_577_length_31628_cov_12_718145	M00051	orotidine-5'-phosphate decarboxylase [EC:4.1.1.23]
124	Acetatifactor_sp011959105	Acetatifactor_sp011959105	K00609	15598	NODE_164_length_73312_cov_12_071474	M00051	aspartate carbamoyltransferase catalytic subunit [EC:2.1.3.2]
125	Acetatifactor_sp011959105	Acetatifactor_sp011959105	K01956	13402	NODE_41_length_132337_cov_18_822122	M00051	carbamoyl-phosphate synthase small subunit [EC:6.3.5.5]
126	Acetatifactor_sp011959105	Acetatifactor_sp011959105	K01465	18049	NODE_30_length_149858_cov_15_556724	M00051	dihydroorotase [EC:3.5.2.3]
127	Acetatifactor_sp011959105	Acetatifactor_sp011959105	K09903	114	NODE_298_length_51759_cov_14_301466	M00052	uridylate kinase [EC:2.7.4.22]
128	Acetatifactor_sp011959105	Acetatifactor_sp011959105	K01937	13404	NODE_41_length_132337_cov_18_822122	M00052	CTP synthase [EC:6.3.4.2]
129	Acetatifactor_sp011959105	Acetatifactor_sp011959105	K01520	30765	NODE_98_length_96321_cov_12_702356	M00053	dUTP pyrophosphatase [EC:3.6.1.23]
130	Acetatifactor_sp011959105	Acetatifactor_sp011959105	K21636	36336	NODE_213_length_64308_cov_13_756245	M00053	ribonucleoside-triphosphate reductase (formate) [EC:1.1.98.6]
131	Acetatifactor_sp011959105	Acetatifactor_sp011959105	K21636	30767	NODE_98_length_96321_cov_12_702356	M00053	ribonucleoside-triphosphate reductase (formate) [EC:1.1.98.6]
132	Acetatifactor_sp011959105	Acetatifactor_sp011959105	K00831	28502	NODE_130_length_83251_cov_13_260974	M00020,M00124	phosphoserine aminotransferase [EC:2.6.1.52]
133	Acetatifactor_sp011959105	Acetatifactor_sp011959105	K02203	30723	NODE_98_length_96321_cov_12_702356	M00020,M00018	phosphoserine / homoserine phosphotransferase [EC:3.1.3.3 2.7.1.39]
134	Acetatifactor_sp011959105	Acetatifactor_sp011959105	K00058	28501	NODE_130_length_83251_cov_13_260974	M00020	D-3-phosphoglycerate dehydrogenase / 2-oxoglutarate reductase [EC:1.1.1.95 1.1.1.399]
135	Acetatifactor_sp011959105	Acetatifactor_sp011959105	K00003	1	NODE_61_length_118937_cov_14_458236	M00018,M00017	homoserine dehydrogenase [EC:1.1.1.3]
136	Acetatifactor_sp011959105	Acetatifactor_sp011959105	K00928	0	NODE_61_length_118937_cov_14_458236	M00018,M00033,M00017,M00016,M00525,M00526,M00527	aspartate kinase [EC:2.7.2.4]
137	Acetatifactor_sp011959105	Acetatifactor_sp011959105	K01733	37196	NODE_181_length_70068_cov_11_923186	M00018	threonine synthase [EC:4.2.3.1]
138	Acetatifactor_sp011959105	Acetatifactor_sp011959105	K01738	31421	NODE_94_length_96797_cov_15_169771	M00021	cysteine synthase [EC:2.5.1.47]
139	Acetatifactor_sp011959105	Acetatifactor_sp011959105	K00789	20161	NODE_13_length_205171_cov_15_453119	M00609,M00034,M00035,M00368	S-adenosylmethionine synthetase [EC:2.5.1.6]
140	Acetatifactor_sp011959105	Acetatifactor_sp011959105	K01243	36308	NODE_213_length_64308_cov_13_756245	M00609,M00034	adenosylhomocysteine nucleosidase [EC:3.2.2.9]
141	Acetatifactor_sp011959105	Acetatifactor_sp011959105	K01243	1238	NODE_35_length_142391_cov_15_490389	M00609,M00034	adenosylhomocysteine nucleosidase [EC:3.2.2.9]
142	Acetatifactor_sp011959105	Acetatifactor_sp011959105	K07173	1239	NODE_35_length_142391_cov_15_490389	M00609	S-ribosylhomocysteine lyase [EC:4.4.1.21]
143	Acetatifactor_sp011959105	Acetatifactor_sp011959105	K00651	10755	NODE_38_length_136065_cov_13_341416	M00017	homoserine O-succinyltransferase/O-acetyltransferase [EC:2.3.1.46 2.3.1.31]
144	Acetatifactor_sp011959105	Acetatifactor_sp011959105	K00548	25770	NODE_185_length_69401_cov_11_534349	M00017	5-methyltetrahydrofolate--homocysteine methyltransferase [EC:2.1.1.13]
145	Acetatifactor_sp011959105	Acetatifactor_sp011959105	K00797	20035	NODE_13_length_205171_cov_15_453119	M00034,M00133	spermidine synthase [EC:2.5.1.16]
146	Acetatifactor_sp011959105	Acetatifactor_sp011959105	K00797	21726	NODE_204_length_65612_cov_16_144515	M00034,M00133	spermidine synthase [EC:2.5.1.16]
147	Acetatifactor_sp011959105	Acetatifactor_sp011959105	K00558	46	NODE_61_length_118937_cov_14_458236	M00035	DNA (cytosine-5)-methyltransferase 1 [EC:2.1.1.37]
148	Acetatifactor_sp011959105	Acetatifactor_sp011959105	K00826	32121	NODE_114_length_91042_cov_14_159297	M00019,M00570,M00036,M00119	branched-chain amino acid aminotransferase [EC:2.6.1.42]
149	Acetatifactor_sp011959105	Acetatifactor_sp011959105	K00053	25766	NODE_185_length_69401_cov_11_534349	M00019,M00570	ketol-acid reductoisomerase [EC:1.1.1.86]
150	Acetatifactor_sp011959105	Acetatifactor_sp011959105	K01652	28504	NODE_130_length_83251_cov_13_260974	M00019,M00570	acetolactate synthase I/II/III large subunit [EC:2.2.1.6]
151	Acetatifactor_sp011959105	Acetatifactor_sp011959105	K01652	25769	NODE_185_length_69401_cov_11_534349	M00019,M00570	acetolactate synthase I/II/III large subunit [EC:2.2.1.6]
152	Acetatifactor_sp011959105	Acetatifactor_sp011959105	K01653	25768	NODE_185_length_69401_cov_11_534349	M00019,M00570	acetolactate synthase I/III small subunit [EC:2.2.1.6]
153	Acetatifactor_sp011959105	Acetatifactor_sp011959105	K01653	25767	NODE_185_length_69401_cov_11_534349	M00019,M00570	acetolactate synthase I/III small subunit [EC:2.2.1.6]
154	Acetatifactor_sp011959105	Acetatifactor_sp011959105	K01687	28505	NODE_130_length_83251_cov_13_260974	M00019,M00570	dihydroxy-acid dehydratase [EC:4.2.1.9]
155	Acetatifactor_sp011959105	Acetatifactor_sp011959105	K01703	39927	NODE_235_length_60330_cov_12_494185	M00535,M00432	3-isopropylmalate/(R)-2-methylmalate dehydratase large subunit [EC:4.2.1.33 4.2.1.35]
156	Acetatifactor_sp011959105	Acetatifactor_sp011959105	K01704	39926	NODE_235_length_60330_cov_12_494185	M00535,M00432	3-isopropylmalate/(R)-2-methylmalate dehydratase small subunit [EC:4.2.1.33 4.2.1.35]
157	Acetatifactor_sp011959105	Acetatifactor_sp011959105	K00052	28506	NODE_130_length_83251_cov_13_260974	M00535,M00432	3-isopropylmalate dehydrogenase [EC:1.1.1.85]
158	Acetatifactor_sp011959105	Acetatifactor_sp011959105	K01754	39960	NODE_235_length_60330_cov_12_494185	M00570	threonine dehydratase [EC:4.3.1.19]
159	Acetatifactor_sp011959105	Acetatifactor_sp011959105	K01649	4449	NODE_3762_length_7410_cov_17_833855	M00432	2-isopropylmalate synthase [EC:2.3.3.13]
160	Acetatifactor_sp011959105	Acetatifactor_sp011959105	K01714	2306	NODE_302_length_51364_cov_13_428170	M00016,M00525,M00526,M00527	4-hydroxy-tetrahydrodipicolinate synthase [EC:4.3.3.7]
161	Acetatifactor_sp011959105	Acetatifactor_sp011959105	K01778	31381	NODE_94_length_96797_cov_15_169771	M00016,M00525,M00527	diaminopimelate epimerase [EC:5.1.1.7]
162	Acetatifactor_sp011959105	Acetatifactor_sp011959105	K00215	2305	NODE_302_length_51364_cov_13_428170	M00016,M00525,M00526,M00527	4-hydroxy-tetrahydrodipicolinate reductase [EC:1.17.1.8]
163	Acetatifactor_sp011959105	Acetatifactor_sp011959105	K01586	33259	NODE_240_length_59686_cov_12_128574	M00016,M00525,M00526,M00527	diaminopimelate decarboxylase [EC:4.1.1.20]
164	Acetatifactor_sp011959105	Acetatifactor_sp011959105	K00821	26	NODE_61_length_118937_cov_14_458236	M00016,M00028,M00845	acetylornithine/N-succinyldiaminopimelate aminotransferase [EC:2.6.1.11 2.6.1.17]
165	Acetatifactor_sp011959105	Acetatifactor_sp011959105	K03340	33258	NODE_240_length_59686_cov_12_128574	M00526	diaminopimelate dehydrogenase [EC:1.4.1.16]
166	Acetatifactor_sp011959105	Acetatifactor_sp011959105	K10206	31380	NODE_94_length_96797_cov_15_169771	M00527	LL-diaminopimelate aminotransferase [EC:2.6.1.83]
167	Acetatifactor_sp011959105	Acetatifactor_sp011959105	K00290	21724	NODE_204_length_65612_cov_16_144515	M00030	saccharopine dehydrogenase (NAD+, L-lysine forming) [EC:1.5.1.7]
168	Acetatifactor_sp011959105	Acetatifactor_sp011959105	K00145	32	NODE_61_length_118937_cov_14_458236	M00028,M00845	N-acetyl-gamma-glutamyl-phosphate reductase [EC:1.2.1.38]
169	Acetatifactor_sp011959105	Acetatifactor_sp011959105	K00620	29	NODE_61_length_118937_cov_14_458236	M00028	glutamate N-acetyltransferase / amino-acid N-acetyltransferase [EC:2.3.1.35 2.3.1.1]
170	Acetatifactor_sp011959105	Acetatifactor_sp011959105	K22477	30	NODE_61_length_118937_cov_14_458236	M00028	N-acetylglutamate synthase [EC:2.3.1.1]
171	Acetatifactor_sp011959105	Acetatifactor_sp011959105	K00930	27	NODE_61_length_118937_cov_14_458236	M00028	acetylglutamate kinase [EC:2.7.2.8]
172	Acetatifactor_sp011959105	Acetatifactor_sp011959105	K00611	20153	NODE_13_length_205171_cov_15_453119	M00844,M00029	ornithine carbamoyltransferase [EC:2.1.3.3]
173	Acetatifactor_sp011959105	Acetatifactor_sp011959105	K01940	34	NODE_61_length_118937_cov_14_458236	M00844,M00845,M00029	argininosuccinate synthase [EC:6.3.4.5]
174	Acetatifactor_sp011959105	Acetatifactor_sp011959105	K00286	20157	NODE_13_length_205171_cov_15_453119	M00015	pyrroline-5-carboxylate reductase [EC:1.5.1.2]
175	Acetatifactor_sp011959105	Acetatifactor_sp011959105	K00147	25774	NODE_185_length_69401_cov_11_534349	M00015	glutamate-5-semialdehyde dehydrogenase [EC:1.2.1.41]
176	Acetatifactor_sp011959105	Acetatifactor_sp011959105	K00931	25777	NODE_185_length_69401_cov_11_534349	M00015	glutamate 5-kinase [EC:2.7.2.11]
177	Acetatifactor_sp011959105	Acetatifactor_sp011959105	K01585	14486	NODE_15_length_192602_cov_15_584621	M00133	arginine decarboxylase [EC:4.1.1.19]
178	Acetatifactor_sp011959105	Acetatifactor_sp011959105	K01480	21725	NODE_204_length_65612_cov_16_144515	M00133	agmatinase [EC:3.5.3.11]
179	Acetatifactor_sp011959105	Acetatifactor_sp011959105	K04486	35484	NODE_493_length_36152_cov_12_277004	M00026	histidinol-phosphatase (PHP family) [EC:3.1.3.15]
180	Acetatifactor_sp011959105	Acetatifactor_sp011959105	K01814	2300	NODE_302_length_51364_cov_13_428170	M00026	phosphoribosylformimino-5-aminoimidazole carboxamide ribotide isomerase [EC:5.3.1.16]
181	Acetatifactor_sp011959105	Acetatifactor_sp011959105	K02501	33255	NODE_240_length_59686_cov_12_128574	M00026	imidazole glycerol-phosphate synthase subunit HisH [EC:4.3.2.10]
182	Acetatifactor_sp011959105	Acetatifactor_sp011959105	K00817	31386	NODE_94_length_96797_cov_15_169771	M00026	histidinol-phosphate aminotransferase [EC:2.6.1.9]
183	Acetatifactor_sp011959105	Acetatifactor_sp011959105	K02502	30709	NODE_98_length_96321_cov_12_702356	M00026	ATP phosphoribosyltransferase regulatory subunit
184	Acetatifactor_sp011959105	Acetatifactor_sp011959105	K01693	30712	NODE_98_length_96321_cov_12_702356	M00026	imidazoleglycerol-phosphate dehydratase [EC:4.2.1.19]
185	Acetatifactor_sp011959105	Acetatifactor_sp011959105	K01496	30713	NODE_98_length_96321_cov_12_702356	M00026	phosphoribosyl-AMP cyclohydrolase [EC:3.5.4.19]
186	Acetatifactor_sp011959105	Acetatifactor_sp011959105	K02500	33256	NODE_240_length_59686_cov_12_128574	M00026	imidazole glycerol-phosphate synthase subunit HisF [EC:4.3.2.10]
187	Acetatifactor_sp011959105	Acetatifactor_sp011959105	K00765	30710	NODE_98_length_96321_cov_12_702356	M00026	ATP phosphoribosyltransferase [EC:2.4.2.17]
188	Acetatifactor_sp011959105	Acetatifactor_sp011959105	K00013	30711	NODE_98_length_96321_cov_12_702356	M00026	histidinol dehydrogenase [EC:1.1.1.23]
189	Acetatifactor_sp011959105	Acetatifactor_sp011959105	K03786	28539	NODE_130_length_83251_cov_13_260974	M00022	3-dehydroquinate dehydratase II [EC:4.2.1.10]
190	Acetatifactor_sp011959105	Acetatifactor_sp011959105	K00800	31424	NODE_94_length_96797_cov_15_169771	M00022	3-phosphoshikimate 1-carboxyvinyltransferase [EC:2.5.1.19]
191	Acetatifactor_sp011959105	Acetatifactor_sp011959105	K01735	30743	NODE_98_length_96321_cov_12_702356	M00022	3-dehydroquinate synthase [EC:4.2.3.4]
192	Acetatifactor_sp011959105	Acetatifactor_sp011959105	K01736	10808	NODE_38_length_136065_cov_13_341416	M00022	chorismate synthase [EC:4.2.3.5]
193	Acetatifactor_sp011959105	Acetatifactor_sp011959105	K00014	28541	NODE_130_length_83251_cov_13_260974	M00022	shikimate dehydrogenase [EC:1.1.1.25]
194	Acetatifactor_sp011959105	Acetatifactor_sp011959105	K01626	35490	NODE_493_length_36152_cov_12_277004	M00022	3-deoxy-7-phosphoheptulonate synthase [EC:2.5.1.54]
195	Acetatifactor_sp011959105	Acetatifactor_sp011959105	K00891	28540	NODE_130_length_83251_cov_13_260974	M00022	shikimate kinase [EC:2.7.1.71]
196	Acetatifactor_sp011959105	Acetatifactor_sp011959105	K01696	39974	NODE_235_length_60330_cov_12_494185	M00023	tryptophan synthase beta chain [EC:4.2.1.20]
197	Acetatifactor_sp011959105	Acetatifactor_sp011959105	K06001	25790	NODE_185_length_69401_cov_11_534349	M00023	tryptophan synthase beta chain [EC:4.2.1.20]
198	Acetatifactor_sp011959105	Acetatifactor_sp011959105	K01695	39973	NODE_235_length_60330_cov_12_494185	M00023	tryptophan synthase alpha chain [EC:4.2.1.20]
199	Acetatifactor_sp011959105	Acetatifactor_sp011959105	K14170	8269	NODE_320_length_49611_cov_17_172270	M00024,M00025,M00040	chorismate mutase / prephenate dehydratase [EC:5.4.99.5 4.2.1.51]
200	Acetatifactor_sp011959105	Acetatifactor_sp011959105	K06209	2	NODE_61_length_118937_cov_14_458236	M00024,M00025	chorismate mutase [EC:5.4.99.5]
201	Acetatifactor_sp011959105	Acetatifactor_sp011959105	K04518	8269	NODE_320_length_49611_cov_17_172270	M00024	prephenate dehydratase [EC:4.2.1.51]
202	Acetatifactor_sp011959105	Acetatifactor_sp011959105	K04517	28513	NODE_130_length_83251_cov_13_260974	M00025	prephenate dehydrogenase [EC:1.3.1.12]
203	Acetatifactor_sp011959105	Acetatifactor_sp011959105	K00728	34188	NODE_368_length_45170_cov_13_660911	M00872	dolichyl-phosphate-mannose-protein mannosyltransferase [EC:2.4.1.109]
204	Acetatifactor_sp011959105	Acetatifactor_sp011959105	K12373	20120	NODE_13_length_205171_cov_15_453119	M00079	hexosaminidase [EC:3.2.1.52]
205	Acetatifactor_sp011959105	Acetatifactor_sp011959105	K12373	9583	NODE_234_length_60341_cov_12_095578	M00079	hexosaminidase [EC:3.2.1.52]
206	Acetatifactor_sp011959105	Acetatifactor_sp011959105	K15894	14429	NODE_15_length_192602_cov_15_584621	M00923	UDP-N-acetylglucosamine 4,6-dehydratase/5-epimerase [EC:4.2.1.115 5.1.3.-]
207	Acetatifactor_sp011959105	Acetatifactor_sp011959105	K00788	150	NODE_298_length_51759_cov_14_301466	M00127,M00895,M00896,M00899	thiamine-phosphate pyrophosphorylase [EC:2.5.1.3]
208	Acetatifactor_sp011959105	Acetatifactor_sp011959105	K03151	8303	NODE_132_length_82334_cov_15_986473	M00127,M00895	tRNA uracil 4-sulfurtransferase [EC:2.8.1.4]
209	Acetatifactor_sp011959105	Acetatifactor_sp011959105	K00941	151	NODE_298_length_51759_cov_14_301466	M00127,M00895,M00896,M00899	hydroxymethylpyrimidine/phosphomethylpyrimidine kinase [EC:2.7.1.49 2.7.4.7]
210	Acetatifactor_sp011959105	Acetatifactor_sp011959105	K00949	5318	NODE_1317_length_16298_cov_13_782614	M00897,M00898	thiamine pyrophosphokinase [EC:2.7.6.2]
211	Acetatifactor_sp011959105	Acetatifactor_sp011959105	K21064	34928	NODE_121_length_86585_cov_16_929389	M00125	5-amino-6-(5-phospho-D-ribitylamino)uracil phosphatase [EC:3.1.3.104]
212	Acetatifactor_sp011959105	Acetatifactor_sp011959105	K21064	18067	NODE_30_length_149858_cov_15_556724	M00125	5-amino-6-(5-phospho-D-ribitylamino)uracil phosphatase [EC:3.1.3.104]
213	Acetatifactor_sp011959105	Acetatifactor_sp011959105	K21064	8254	NODE_320_length_49611_cov_17_172270	M00125	5-amino-6-(5-phospho-D-ribitylamino)uracil phosphatase [EC:3.1.3.104]
214	Acetatifactor_sp011959105	Acetatifactor_sp011959105	K01497	8280	NODE_320_length_49611_cov_17_172270	M00125,M00911	GTP cyclohydrolase II [EC:3.5.4.25]
215	Acetatifactor_sp011959105	Acetatifactor_sp011959105	K11753	14503	NODE_827_length_23923_cov_13_399698	M00125	riboflavin kinase / FMN adenylyltransferase [EC:2.7.1.26 2.7.7.2]
216	Acetatifactor_sp011959105	Acetatifactor_sp011959105	K01950	10733	NODE_38_length_136065_cov_13_341416	M00115,M00912	NAD+ synthase (glutamine-hydrolysing) [EC:6.3.5.1]
217	Acetatifactor_sp011959105	Acetatifactor_sp011959105	K00969	30734	NODE_98_length_96321_cov_12_702356	M00115,M00912	nicotinate-nucleotide adenylyltransferase [EC:2.7.7.18]
218	Acetatifactor_sp011959105	Acetatifactor_sp011959105	K00859	33287	NODE_240_length_59686_cov_12_128574	M00120	dephospho-CoA kinase [EC:2.7.1.24]
219	Acetatifactor_sp011959105	Acetatifactor_sp011959105	K03525	20150	NODE_13_length_205171_cov_15_453119	M00120	type III pantothenate kinase [EC:2.7.1.33]
220	Acetatifactor_sp011959105	Acetatifactor_sp011959105	K00954	30698	NODE_98_length_96321_cov_12_702356	M00120	pantetheine-phosphate adenylyltransferase [EC:2.7.7.3]
221	Acetatifactor_sp011959105	Acetatifactor_sp011959105	K00796	8262	NODE_320_length_49611_cov_17_172270	M00126	dihydropteroate synthase [EC:2.5.1.15]
222	Acetatifactor_sp011959105	Acetatifactor_sp011959105	K01495	8260	NODE_320_length_49611_cov_17_172270	M00126,M00841,M00842,M00843	GTP cyclohydrolase IA [EC:3.5.4.16]
223	Acetatifactor_sp011959105	Acetatifactor_sp011959105	K13940	8263	NODE_320_length_49611_cov_17_172270	M00126	dihydroneopterin aldolase / 2-amino-4-hydroxy-6-hydroxymethyldihydropteridine diphosphokinase [EC:4.1.2.25 2.7.6.3]
224	Acetatifactor_sp011959105	Acetatifactor_sp011959105	K01633	8263	NODE_320_length_49611_cov_17_172270	M00126,M00840	7,8-dihydroneopterin aldolase/epimerase/oxygenase [EC:4.1.2.25 5.1.99.8 1.13.11.81]
225	Acetatifactor_sp011959105	Acetatifactor_sp011959105	K00950	8263	NODE_320_length_49611_cov_17_172270	M00126	2-amino-4-hydroxy-6-hydroxymethyldihydropteridine diphosphokinase [EC:2.7.6.3]
226	Acetatifactor_sp011959105	Acetatifactor_sp011959105	K11754	8259	NODE_320_length_49611_cov_17_172270	M00126,M00841	dihydrofolate synthase / folylpolyglutamate synthase [EC:6.3.2.12 6.3.2.17]
227	Acetatifactor_sp011959105	Acetatifactor_sp011959105	K11754	63	NODE_61_length_118937_cov_14_458236	M00126,M00841	dihydrofolate synthase / folylpolyglutamate synthase [EC:6.3.2.12 6.3.2.17]
228	Acetatifactor_sp011959105	Acetatifactor_sp011959105	K00287	32123	NODE_114_length_91042_cov_14_159297	M00126,M00840	dihydrofolate reductase [EC:1.5.1.3]
229	Acetatifactor_sp011959105	Acetatifactor_sp011959105	K01698	32149	NODE_114_length_91042_cov_14_159297	M00846,M00868,M00121,M00926	porphobilinogen synthase [EC:4.2.1.24]
230	Acetatifactor_sp011959105	Acetatifactor_sp011959105	K13542	32150	NODE_114_length_91042_cov_14_159297	M00846,M00121,M00926,M00924,M00925	uroporphyrinogen III methyltransferase / synthase [EC:2.1.1.107 4.2.1.75]
231	Acetatifactor_sp011959105	Acetatifactor_sp011959105	K01719	32150	NODE_114_length_91042_cov_14_159297	M00846,M00868,M00121,M00926	uroporphyrinogen-III synthase [EC:4.2.1.75]
232	Acetatifactor_sp011959105	Acetatifactor_sp011959105	K02492	32153	NODE_114_length_91042_cov_14_159297	M00846,M00121,M00926	glutamyl-tRNA reductase [EC:1.2.1.70]
233	Acetatifactor_sp011959105	Acetatifactor_sp011959105	K01749	32151	NODE_114_length_91042_cov_14_159297	M00846,M00868,M00121,M00926	hydroxymethylbilane synthase [EC:2.5.1.61]
234	Acetatifactor_sp011959105	Acetatifactor_sp011959105	K02303	32150	NODE_114_length_91042_cov_14_159297	M00846,M00924,M00925	uroporphyrin-III C-methyltransferase [EC:2.1.1.107]
235	Acetatifactor_sp011959105	Acetatifactor_sp011959105	K02304	32152	NODE_114_length_91042_cov_14_159297	M00846,M00924	precorrin-2 dehydrogenase / sirohydrochlorin ferrochelatase [EC:1.3.1.76 4.99.1.4]
236	Acetatifactor_sp011959105	Acetatifactor_sp011959105	K01845	32148	NODE_114_length_91042_cov_14_159297	M00846,M00121,M00926	glutamate-1-semialdehyde 2,1-aminomutase [EC:5.4.3.8]
237	Acetatifactor_sp011959105	Acetatifactor_sp011959105	K02495	103	NODE_298_length_51759_cov_14_301466	M00121	oxygen-independent coproporphyrinogen III oxidase [EC:1.3.98.3]
238	Acetatifactor_sp011959105	Acetatifactor_sp011959105	K01885	10814	NODE_38_length_136065_cov_13_341416	M00121	glutamyl-tRNA synthetase [EC:6.1.1.17]
239	Acetatifactor_sp011959105	Acetatifactor_sp011959105	K02226	38085	NODE_180_length_70124_cov_13_959511	M00122	alpha-ribazole phosphatase [EC:3.1.3.73]
240	Acetatifactor_sp011959105	Acetatifactor_sp011959105	K09834	137	NODE_298_length_51759_cov_14_301466	M00112	tocopherol cyclase [EC:5.5.1.24]
241	Acetatifactor_sp011959105	Acetatifactor_sp011959105	K03527	37181	NODE_181_length_70068_cov_11_923186	M00096	4-hydroxy-3-methylbut-2-en-1-yl diphosphate reductase [EC:1.17.7.4]
242	Acetatifactor_sp011959105	Acetatifactor_sp011959105	K00991	24087	NODE_220_length_62708_cov_13_080475	M00096	2-C-methyl-D-erythritol 4-phosphate cytidylyltransferase [EC:2.7.7.60]
243	Acetatifactor_sp011959105	Acetatifactor_sp011959105	K00919	18062	NODE_30_length_149858_cov_15_556724	M00096	4-diphosphocytidyl-2-C-methyl-D-erythritol kinase [EC:2.7.1.148]
244	Acetatifactor_sp011959105	Acetatifactor_sp011959105	K01662	7240	NODE_637_length_28929_cov_14_935721	M00096	1-deoxy-D-xylulose-5-phosphate synthase [EC:2.2.1.7]
245	Acetatifactor_sp011959105	Acetatifactor_sp011959105	K03526	33282	NODE_240_length_59686_cov_12_128574	M00096	(E)-4-hydroxy-3-methylbut-2-enyl-diphosphate synthase [EC:1.17.7.1 1.17.7.3]
246	Acetatifactor_sp011959105	Acetatifactor_sp011959105	K00099	110	NODE_298_length_51759_cov_14_301466	M00096	1-deoxy-D-xylulose-5-phosphate reductoisomerase [EC:1.1.1.267]
247	Acetatifactor_sp011959105	Acetatifactor_sp011959105	K00067	9524	NODE_21_length_173674_cov_16_583087	M00793	dTDP-4-dehydrorhamnose reductase [EC:1.1.1.133]
248	Acetatifactor_sp011959105	Acetatifactor_sp011959105	K01790	14366	NODE_15_length_192602_cov_15_584621	M00793	dTDP-4-dehydrorhamnose 3,5-epimerase [EC:5.1.3.13]
249	Acetatifactor_sp011959105	Acetatifactor_sp011959105	K01710	14369	NODE_15_length_192602_cov_15_584621	M00793	dTDP-glucose 4,6-dehydratase [EC:4.2.1.46]
250	Acetatifactor_sp011959105	Acetatifactor_sp011959105	K00973	14368	NODE_15_length_192602_cov_15_584621	M00793	glucose-1-phosphate thymidylyltransferase [EC:2.7.7.24]
251	Acetatifactor_sp011959105	Acetatifactor_sp011959105	K00588	8312	NODE_132_length_82334_cov_15_986473	M00039	caffeoyl-CoA O-methyltransferase [EC:2.1.1.104]
252	Acetatifactor_sp011959105	Acetatifactor_sp011959105	K02078	31363	NODE_94_length_96797_cov_15_169771	M00848	acyl carrier protein
253	Acetatifactor_sp011959105	Acetatifactor_sp011959105	K02078	1124	NODE_35_length_142391_cov_15_490389	M00848	acyl carrier protein
254	Acetatifactor_sp011959105	Acetatifactor_sp011959105	K02078	14410	NODE_15_length_192602_cov_15_584621	M00848	acyl carrier protein
255	Acetatifactor_sp011959105	Acetatifactor_sp011959105	K02078	8343	NODE_132_length_82334_cov_15_986473	M00848	acyl carrier protein
256	Acetatifactor_sp011959105	Acetatifactor_sp011959105	K02078	39964	NODE_235_length_60330_cov_12_494185	M00848	acyl carrier protein
257	Acetatifactor_sp011959105	Acetatifactor_sp011959105	K02078	14462	NODE_15_length_192602_cov_15_584621	M00848	acyl carrier protein
258	Acetatifactor_sp011959105	Acetatifactor_sp011959105	K09459	9433	NODE_21_length_173674_cov_16_583087	M00903	phosphonopyruvate decarboxylase [EC:4.1.1.82]
259	Acetatifactor_sp011959105	Acetatifactor_sp011959105	K23999	9414	NODE_21_length_173674_cov_16_583087	M00903	phosphoenolpyruvate phosphomutase / 2-hydroxyethylphosphonate cytidylyltransferase [EC:5.4.2.9 2.7.7.104]
260	Acetatifactor_sp011959105	Acetatifactor_sp011959105	K01912	28489	NODE_130_length_83251_cov_13_260974	M00878	phenylacetate-CoA ligase [EC:6.2.1.30]
261	Acetatifactor_sp011959105	Acetatifactor_sp011959105	K02172	14433	NODE_15_length_192602_cov_15_584621	M00627	bla regulator protein blaR1
262	Acetatifactor_sp011959105	Acetatifactor_sp011959105	K02172	1194	NODE_35_length_142391_cov_15_490389	M00627	bla regulator protein blaR1
263	Acetatifactor_sp011959105	Acetatifactor_sp011959105	K02172	20141	NODE_13_length_205171_cov_15_453119	M00627	bla regulator protein blaR1
264	Acetatifactor_sp011959105	Acetatifactor_sp011959105	K02172	6257	NODE_157_length_74937_cov_20_326313	M00627	bla regulator protein blaR1
265	Acetatifactor_sp011959105	Acetatifactor_sp011959105	K02172	2356	NODE_950_length_21443_cov_12_445109	M00627	bla regulator protein blaR1
266	Acetatifactor_sp011959105	Acetatifactor_sp011959105	K02172	15611	NODE_164_length_73312_cov_12_071474	M00627	bla regulator protein blaR1
267	Acetatifactor_sp011959105	Acetatifactor_sp011959105	K02172	8318	NODE_132_length_82334_cov_15_986473	M00627	bla regulator protein blaR1
268	Acetatifactor_sp011959105	Acetatifactor_sp011959105	K02171	14432	NODE_15_length_192602_cov_15_584621	M00627	BlaI family transcriptional regulator, penicillinase repressor
269	Acetatifactor_sp011959105	Acetatifactor_sp011959105	K02171	1193	NODE_35_length_142391_cov_15_490389	M00627	BlaI family transcriptional regulator, penicillinase repressor
270	Acetatifactor_sp011959105	Acetatifactor_sp011959105	K02171	20140	NODE_13_length_205171_cov_15_453119	M00627	BlaI family transcriptional regulator, penicillinase repressor
271	Acetatifactor_sp011959105	Acetatifactor_sp011959105	K02171	19184	NODE_577_length_31628_cov_12_718145	M00627	BlaI family transcriptional regulator, penicillinase repressor
272	Acetatifactor_sp011959105	Acetatifactor_sp011959105	K02171	6258	NODE_157_length_74937_cov_20_326313	M00627	BlaI family transcriptional regulator, penicillinase repressor
273	Acetatifactor_sp011959105	Acetatifactor_sp011959105	K02171	2355	NODE_950_length_21443_cov_12_445109	M00627	BlaI family transcriptional regulator, penicillinase repressor
274	Acetatifactor_sp011959105	Acetatifactor_sp011959105	K02171	13426	NODE_41_length_132337_cov_18_822122	M00627	BlaI family transcriptional regulator, penicillinase repressor
275	Acetatifactor_sp011959105	Acetatifactor_sp011959105	K02171	15612	NODE_164_length_73312_cov_12_071474	M00627	BlaI family transcriptional regulator, penicillinase repressor
276	Acetatifactor_sp011959105	Acetatifactor_sp011959105	K02171	8317	NODE_132_length_82334_cov_15_986473	M00627	BlaI family transcriptional regulator, penicillinase repressor
277	Acetatifactor_sp011959105	Acetatifactor_sp011959105	K18346	18025	NODE_30_length_149858_cov_15_556724	M00651	vancomycin resistance protein VanW
278	Acetatifactor_sp011959105	Acetatifactor_sp011959105	K18346	1155	NODE_35_length_142391_cov_15_490389	M00651	vancomycin resistance protein VanW
279	Acetatifactor_sp011959105	Acetatifactor_sp011959105	K18344	14334	NODE_15_length_192602_cov_15_584621	M00651	two-component system, OmpR family, response regulator VanR
280	Acetatifactor_sp011959105	Acetatifactor_sp011959105	K07260	10807	NODE_38_length_136065_cov_13_341416	M00651	zinc D-Ala-D-Ala carboxypeptidase [EC:3.4.17.14]
281	Acetatifactor_sp011959105	Acetatifactor_sp011959105	K07260	18023	NODE_30_length_149858_cov_15_556724	M00651	zinc D-Ala-D-Ala carboxypeptidase [EC:3.4.17.14]
282	Acetatifactor_sp011959105	Acetatifactor_sp011959105	K18345	14333	NODE_15_length_192602_cov_15_584621	M00651	two-component system, OmpR family, sensor histidine kinase VanS [EC:2.7.13.3]
283	Acetatifactor_sp011959105	Acetatifactor_sp011959105	K18345	37199	NODE_181_length_70068_cov_11_923186	M00651	two-component system, OmpR family, sensor histidine kinase VanS [EC:2.7.13.3]
284	Acetatifactor_sp011959105	Acetatifactor_sp011959105	K18349	39931	NODE_235_length_60330_cov_12_494185	M00652	two-component system, OmpR family, response regulator VanR
285	Acetatifactor_sp011959105	Acetatifactor_sp011959105	K18349	18028	NODE_30_length_149858_cov_15_556724	M00652	two-component system, OmpR family, response regulator VanR
286	Acetatifactor_sp011959105	Acetatifactor_sp011959105	K18349	39943	NODE_235_length_60330_cov_12_494185	M00652	two-component system, OmpR family, response regulator VanR
287	Acetatifactor_sp011959105	Acetatifactor_sp011959105	K18866	18023	NODE_30_length_149858_cov_15_556724	M00652	zinc D-Ala-D-Ala dipeptidase/carboxypeptidase [EC:3.4.13.22 3.4.17.14]
288	Acetatifactor_sp011959105	Acetatifactor_sp011959105	K18856	18024	NODE_30_length_149858_cov_15_556724	M00652	D-alanine---D-serine ligase [EC:6.3.2.35]
289	Acetatifactor_sp011959105	Acetatifactor_sp011959105	K18350	18027	NODE_30_length_149858_cov_15_556724	M00652	two-component system, OmpR family, sensor histidine kinase VanS [EC:2.7.13.3]
290	Acetatifactor_sp011959105	Acetatifactor_sp011959105	K14188	14351	NODE_15_length_192602_cov_15_584621	M00725	D-alanine--poly(phosphoribitol) ligase subunit 2 [EC:6.1.1.13]
291	Acetatifactor_sp011959105	Acetatifactor_sp011959105	K03367	14352	NODE_15_length_192602_cov_15_584621	M00725	D-alanine--poly(phosphoribitol) ligase subunit 1 [EC:6.1.1.13]
292	Acetatifactor_sp011959105	Acetatifactor_sp011959105	K18908	20188	NODE_13_length_205171_cov_15_453119	M00705	multidrug efflux pump
293	Acetatifactor_sp011959105	Acetatifactor_sp011959105	K18909	34218	NODE_368_length_45170_cov_13_660911	M00705	MarR family transcriptional regulator, repressor for mepA
294	Acetatifactor_sp011959105	Acetatifactor_sp011959105	K18785	9585	NODE_234_length_60341_cov_12_095578	None	beta-1,4-mannooligosaccharide/beta-1,4-mannosyl-N-acetylglucosamine phosphorylase [EC:2.4.1.319 2.4.1.320]
295	Acetatifactor_sp011959105	Acetatifactor_sp011959105	K18785	1228	NODE_35_length_142391_cov_15_490389	None	beta-1,4-mannooligosaccharide/beta-1,4-mannosyl-N-acetylglucosamine phosphorylase [EC:2.4.1.319 2.4.1.320]
296	Acetatifactor_sp011959105	Acetatifactor_sp011959105	K02871	9398	NODE_21_length_173674_cov_16_583087	None	large subunit ribosomal protein L13
297	Acetatifactor_sp011959105	Acetatifactor_sp011959105	K07706	20130	NODE_13_length_205171_cov_15_453119	None	two-component system, LytTR family, sensor histidine kinase AgrC [EC:2.7.13.3]
298	Acetatifactor_sp011959105	Acetatifactor_sp011959105	K07706	18083	NODE_30_length_149858_cov_15_556724	None	two-component system, LytTR family, sensor histidine kinase AgrC [EC:2.7.13.3]
299	Acetatifactor_sp011959105	Acetatifactor_sp011959105	K07706	20137	NODE_13_length_205171_cov_15_453119	None	two-component system, LytTR family, sensor histidine kinase AgrC [EC:2.7.13.3]
300	Acetatifactor_sp011959105	Acetatifactor_sp011959105	K07706	3308	NODE_567_length_31966_cov_18_153646	None	two-component system, LytTR family, sensor histidine kinase AgrC [EC:2.7.13.3]
301	Acetatifactor_sp011959105	Acetatifactor_sp011959105	K07706	28531	NODE_130_length_83251_cov_13_260974	None	two-component system, LytTR family, sensor histidine kinase AgrC [EC:2.7.13.3]
302	Acetatifactor_sp011959105	Acetatifactor_sp011959105	K07706	9494	NODE_21_length_173674_cov_16_583087	None	two-component system, LytTR family, sensor histidine kinase AgrC [EC:2.7.13.3]
303	Acetatifactor_sp011959105	Acetatifactor_sp011959105	K18431	9424	NODE_21_length_173674_cov_16_583087	None	CMP-N,N'-diacetyllegionaminic acid synthase [EC:2.7.7.82]
304	Acetatifactor_sp011959105	Acetatifactor_sp011959105	K02864	9513	NODE_21_length_173674_cov_16_583087	None	large subunit ribosomal protein L10
305	Acetatifactor_sp011959105	Acetatifactor_sp011959105	K02904	9369	NODE_21_length_173674_cov_16_583087	None	large subunit ribosomal protein L29
306	Acetatifactor_sp011959105	Acetatifactor_sp011959105	K02906	9361	NODE_21_length_173674_cov_16_583087	None	large subunit ribosomal protein L3
307	Acetatifactor_sp011959105	Acetatifactor_sp011959105	K02867	9510	NODE_21_length_173674_cov_16_583087	None	large subunit ribosomal protein L11
308	Acetatifactor_sp011959105	Acetatifactor_sp011959105	K02907	9379	NODE_21_length_173674_cov_16_583087	None	large subunit ribosomal protein L30
309	Acetatifactor_sp011959105	Acetatifactor_sp011959105	K16786	9392	NODE_21_length_173674_cov_16_583087	None	energy-coupling factor transport system ATP-binding protein [EC:3.6.3.-]
310	Acetatifactor_sp011959105	Acetatifactor_sp011959105	K03406	12032	NODE_905_length_22491_cov_12_879881	None	methyl-accepting chemotaxis protein
311	Acetatifactor_sp011959105	Acetatifactor_sp011959105	K03406	9349	NODE_21_length_173674_cov_16_583087	None	methyl-accepting chemotaxis protein
312	Acetatifactor_sp011959105	Acetatifactor_sp011959105	K03406	2316	NODE_302_length_51364_cov_13_428170	None	methyl-accepting chemotaxis protein
313	Acetatifactor_sp011959105	Acetatifactor_sp011959105	K03406	2317	NODE_302_length_51364_cov_13_428170	None	methyl-accepting chemotaxis protein
314	Acetatifactor_sp011959105	Acetatifactor_sp011959105	K03406	1169	NODE_35_length_142391_cov_15_490389	None	methyl-accepting chemotaxis protein
315	Acetatifactor_sp011959105	Acetatifactor_sp011959105	K03406	24097	NODE_220_length_62708_cov_13_080475	None	methyl-accepting chemotaxis protein
316	Acetatifactor_sp011959105	Acetatifactor_sp011959105	K03406	18086	NODE_30_length_149858_cov_15_556724	None	methyl-accepting chemotaxis protein
317	Acetatifactor_sp011959105	Acetatifactor_sp011959105	K03406	31401	NODE_94_length_96797_cov_15_169771	None	methyl-accepting chemotaxis protein
318	Acetatifactor_sp011959105	Acetatifactor_sp011959105	K03406	48	NODE_61_length_118937_cov_14_458236	None	methyl-accepting chemotaxis protein
319	Acetatifactor_sp011959105	Acetatifactor_sp011959105	K03406	13492	NODE_41_length_132337_cov_18_822122	None	methyl-accepting chemotaxis protein
320	Acetatifactor_sp011959105	Acetatifactor_sp011959105	K03406	20026	NODE_13_length_205171_cov_15_453119	None	methyl-accepting chemotaxis protein
321	Acetatifactor_sp011959105	Acetatifactor_sp011959105	K03406	20029	NODE_13_length_205171_cov_15_453119	None	methyl-accepting chemotaxis protein
322	Acetatifactor_sp011959105	Acetatifactor_sp011959105	K03406	20036	NODE_13_length_205171_cov_15_453119	None	methyl-accepting chemotaxis protein
323	Acetatifactor_sp011959105	Acetatifactor_sp011959105	K03406	31429	NODE_94_length_96797_cov_15_169771	None	methyl-accepting chemotaxis protein
324	Acetatifactor_sp011959105	Acetatifactor_sp011959105	K03406	6228	NODE_167_length_73020_cov_15_007798	None	methyl-accepting chemotaxis protein
325	Acetatifactor_sp011959105	Acetatifactor_sp011959105	K03406	16859	NODE_252_length_57645_cov_14_428165	None	methyl-accepting chemotaxis protein
326	Acetatifactor_sp011959105	Acetatifactor_sp011959105	K03406	15584	NODE_164_length_73312_cov_12_071474	None	methyl-accepting chemotaxis protein
327	Acetatifactor_sp011959105	Acetatifactor_sp011959105	K03406	13419	NODE_41_length_132337_cov_18_822122	None	methyl-accepting chemotaxis protein
328	Acetatifactor_sp011959105	Acetatifactor_sp011959105	K03406	36340	NODE_213_length_64308_cov_13_756245	None	methyl-accepting chemotaxis protein
329	Acetatifactor_sp011959105	Acetatifactor_sp011959105	K03406	7284	NODE_207_length_65192_cov_17_114190	None	methyl-accepting chemotaxis protein
330	Acetatifactor_sp011959105	Acetatifactor_sp011959105	K03406	13438	NODE_41_length_132337_cov_18_822122	None	methyl-accepting chemotaxis protein
331	Acetatifactor_sp011959105	Acetatifactor_sp011959105	K02863	9511	NODE_21_length_173674_cov_16_583087	None	large subunit ribosomal protein L1
332	Acetatifactor_sp011959105	Acetatifactor_sp011959105	K21512	9539	NODE_234_length_60341_cov_12_095578	None	terminase, large subunit [EC:3.1.21.4]
333	Acetatifactor_sp011959105	Acetatifactor_sp011959105	K01198	2309	NODE_302_length_51364_cov_13_428170	None	xylan 1,4-beta-xylosidase [EC:3.2.1.37]
334	Acetatifactor_sp011959105	Acetatifactor_sp011959105	K01198	36312	NODE_213_length_64308_cov_13_756245	None	xylan 1,4-beta-xylosidase [EC:3.2.1.37]
335	Acetatifactor_sp011959105	Acetatifactor_sp011959105	K01198	82	NODE_61_length_118937_cov_14_458236	None	xylan 1,4-beta-xylosidase [EC:3.2.1.37]
336	Acetatifactor_sp011959105	Acetatifactor_sp011959105	K01198	9496	NODE_21_length_173674_cov_16_583087	None	xylan 1,4-beta-xylosidase [EC:3.2.1.37]
337	Acetatifactor_sp011959105	Acetatifactor_sp011959105	K01198	33273	NODE_240_length_59686_cov_12_128574	None	xylan 1,4-beta-xylosidase [EC:3.2.1.37]
338	Acetatifactor_sp011959105	Acetatifactor_sp011959105	K01198	94	NODE_61_length_118937_cov_14_458236	None	xylan 1,4-beta-xylosidase [EC:3.2.1.37]
339	Acetatifactor_sp011959105	Acetatifactor_sp011959105	K07271	9408	NODE_21_length_173674_cov_16_583087	None	lipopolysaccharide cholinephosphotransferase [EC:2.7.8.-]
340	Acetatifactor_sp011959105	Acetatifactor_sp011959105	K07271	9418	NODE_21_length_173674_cov_16_583087	None	lipopolysaccharide cholinephosphotransferase [EC:2.7.8.-]
341	Acetatifactor_sp011959105	Acetatifactor_sp011959105	K07271	9413	NODE_21_length_173674_cov_16_583087	None	lipopolysaccharide cholinephosphotransferase [EC:2.7.8.-]
342	Acetatifactor_sp011959105	Acetatifactor_sp011959105	K00046	9580	NODE_234_length_60341_cov_12_095578	None	gluconate 5-dehydrogenase [EC:1.1.1.69]
343	Acetatifactor_sp011959105	Acetatifactor_sp011959105	K01358	19176	NODE_577_length_31628_cov_12_718145	None	ATP-dependent Clp protease, protease subunit [EC:3.4.21.92]
344	Acetatifactor_sp011959105	Acetatifactor_sp011959105	K01358	10787	NODE_38_length_136065_cov_13_341416	None	ATP-dependent Clp protease, protease subunit [EC:3.4.21.92]
345	Acetatifactor_sp011959105	Acetatifactor_sp011959105	K01358	19164	NODE_577_length_31628_cov_12_718145	None	ATP-dependent Clp protease, protease subunit [EC:3.4.21.92]
346	Acetatifactor_sp011959105	Acetatifactor_sp011959105	K01358	9542	NODE_234_length_60341_cov_12_095578	None	ATP-dependent Clp protease, protease subunit [EC:3.4.21.92]
347	Acetatifactor_sp011959105	Acetatifactor_sp011959105	K02876	9380	NODE_21_length_173674_cov_16_583087	None	large subunit ribosomal protein L15
348	Acetatifactor_sp011959105	Acetatifactor_sp011959105	K16787	9393	NODE_21_length_173674_cov_16_583087	None	energy-coupling factor transport system ATP-binding protein [EC:3.6.3.-]
349	Acetatifactor_sp011959105	Acetatifactor_sp011959105	K16785	9394	NODE_21_length_173674_cov_16_583087	None	energy-coupling factor transport system permease protein
350	Acetatifactor_sp011959105	Acetatifactor_sp011959105	K02874	9371	NODE_21_length_173674_cov_16_583087	None	large subunit ribosomal protein L14
351	Acetatifactor_sp011959105	Acetatifactor_sp011959105	K07273	9568	NODE_234_length_60341_cov_12_095578	None	lysozyme
352	Acetatifactor_sp011959105	Acetatifactor_sp011959105	K07273	14370	NODE_15_length_192602_cov_15_584621	None	lysozyme
353	Acetatifactor_sp011959105	Acetatifactor_sp011959105	K07273	37191	NODE_181_length_70068_cov_11_923186	None	lysozyme
354	Acetatifactor_sp011959105	Acetatifactor_sp011959105	K07273	20054	NODE_13_length_205171_cov_15_453119	None	lysozyme
355	Acetatifactor_sp011959105	Acetatifactor_sp011959105	K07273	57	NODE_61_length_118937_cov_14_458236	None	lysozyme
356	Acetatifactor_sp011959105	Acetatifactor_sp011959105	K07273	14367	NODE_15_length_192602_cov_15_584621	None	lysozyme
357	Acetatifactor_sp011959105	Acetatifactor_sp011959105	K02518	9385	NODE_21_length_173674_cov_16_583087	None	translation initiation factor IF-1
358	Acetatifactor_sp011959105	Acetatifactor_sp011959105	K07407	15593	NODE_164_length_73312_cov_12_071474	None	alpha-galactosidase [EC:3.2.1.22]
359	Acetatifactor_sp011959105	Acetatifactor_sp011959105	K07407	38122	NODE_180_length_70124_cov_13_959511	None	alpha-galactosidase [EC:3.2.1.22]
360	Acetatifactor_sp011959105	Acetatifactor_sp011959105	K07407	20075	NODE_13_length_205171_cov_15_453119	None	alpha-galactosidase [EC:3.2.1.22]
361	Acetatifactor_sp011959105	Acetatifactor_sp011959105	K07407	9582	NODE_234_length_60341_cov_12_095578	None	alpha-galactosidase [EC:3.2.1.22]
362	Acetatifactor_sp011959105	Acetatifactor_sp011959105	K07407	34895	NODE_121_length_86585_cov_16_929389	None	alpha-galactosidase [EC:3.2.1.22]
363	Acetatifactor_sp011959105	Acetatifactor_sp011959105	K03073	9508	NODE_21_length_173674_cov_16_583087	None	preprotein translocase subunit SecE
364	Acetatifactor_sp011959105	Acetatifactor_sp011959105	K06320	9492	NODE_21_length_173674_cov_16_583087	None	spore maturation protein CgeB
365	Acetatifactor_sp011959105	Acetatifactor_sp011959105	K02965	9365	NODE_21_length_173674_cov_16_583087	None	small subunit ribosomal protein S19
366	Acetatifactor_sp011959105	Acetatifactor_sp011959105	K02948	9387	NODE_21_length_173674_cov_16_583087	None	small subunit ribosomal protein S11
367	Acetatifactor_sp011959105	Acetatifactor_sp011959105	K02395	14392	NODE_15_length_192602_cov_15_584621	None	peptidoglycan hydrolase FlgJ
368	Acetatifactor_sp011959105	Acetatifactor_sp011959105	K02395	9506	NODE_21_length_173674_cov_16_583087	None	peptidoglycan hydrolase FlgJ
369	Acetatifactor_sp011959105	Acetatifactor_sp011959105	K02961	9370	NODE_21_length_173674_cov_16_583087	None	small subunit ribosomal protein S17
370	Acetatifactor_sp011959105	Acetatifactor_sp011959105	K06905	9554	NODE_234_length_60341_cov_12_095578	None	uncharacterized protein
371	Acetatifactor_sp011959105	Acetatifactor_sp011959105	K01265	9383	NODE_21_length_173674_cov_16_583087	None	methionyl aminopeptidase [EC:3.4.11.18]
372	Acetatifactor_sp011959105	Acetatifactor_sp011959105	K02988	9378	NODE_21_length_173674_cov_16_583087	None	small subunit ribosomal protein S5
373	Acetatifactor_sp011959105	Acetatifactor_sp011959105	K03076	9381	NODE_21_length_173674_cov_16_583087	None	preprotein translocase subunit SecY
374	Acetatifactor_sp011959105	Acetatifactor_sp011959105	K05349	9497	NODE_21_length_173674_cov_16_583087	None	beta-glucosidase [EC:3.2.1.21]
375	Acetatifactor_sp011959105	Acetatifactor_sp011959105	K05349	19153	NODE_215_length_63614_cov_15_223509	None	beta-glucosidase [EC:3.2.1.21]
376	Acetatifactor_sp011959105	Acetatifactor_sp011959105	K05349	33278	NODE_240_length_59686_cov_12_128574	None	beta-glucosidase [EC:3.2.1.21]
377	Acetatifactor_sp011959105	Acetatifactor_sp011959105	K02355	28512	NODE_130_length_83251_cov_13_260974	None	elongation factor G
378	Acetatifactor_sp011959105	Acetatifactor_sp011959105	K02355	9527	NODE_21_length_173674_cov_16_583087	None	elongation factor G
379	Acetatifactor_sp011959105	Acetatifactor_sp011959105	K03088	19180	NODE_577_length_31628_cov_12_718145	None	RNA polymerase sigma-70 factor, ECF subfamily
380	Acetatifactor_sp011959105	Acetatifactor_sp011959105	K03088	20109	NODE_13_length_205171_cov_15_453119	None	RNA polymerase sigma-70 factor, ECF subfamily
381	Acetatifactor_sp011959105	Acetatifactor_sp011959105	K03088	9356	NODE_21_length_173674_cov_16_583087	None	RNA polymerase sigma-70 factor, ECF subfamily
382	Acetatifactor_sp011959105	Acetatifactor_sp011959105	K03088	1199	NODE_35_length_142391_cov_15_490389	None	RNA polymerase sigma-70 factor, ECF subfamily
383	Acetatifactor_sp011959105	Acetatifactor_sp011959105	K03088	9523	NODE_21_length_173674_cov_16_583087	None	RNA polymerase sigma-70 factor, ECF subfamily
384	Acetatifactor_sp011959105	Acetatifactor_sp011959105	K03088	14358	NODE_15_length_192602_cov_15_584621	None	RNA polymerase sigma-70 factor, ECF subfamily
385	Acetatifactor_sp011959105	Acetatifactor_sp011959105	K03088	34207	NODE_368_length_45170_cov_13_660911	None	RNA polymerase sigma-70 factor, ECF subfamily
386	Acetatifactor_sp011959105	Acetatifactor_sp011959105	K03046	9516	NODE_21_length_173674_cov_16_583087	None	DNA-directed RNA polymerase subunit beta' [EC:2.7.7.6]
387	Acetatifactor_sp011959105	Acetatifactor_sp011959105	K02358	9528	NODE_21_length_173674_cov_16_583087	None	elongation factor Tu
388	Acetatifactor_sp011959105	Acetatifactor_sp011959105	K02601	9509	NODE_21_length_173674_cov_16_583087	None	transcription termination/antitermination protein NusG
389	Acetatifactor_sp011959105	Acetatifactor_sp011959105	K02952	9386	NODE_21_length_173674_cov_16_583087	None	small subunit ribosomal protein S13
390	Acetatifactor_sp011959105	Acetatifactor_sp011959105	K02946	9360	NODE_21_length_173674_cov_16_583087	None	small subunit ribosomal protein S10
391	Acetatifactor_sp011959105	Acetatifactor_sp011959105	K06908	9550	NODE_234_length_60341_cov_12_095578	None	uncharacterized protein
392	Acetatifactor_sp011959105	Acetatifactor_sp011959105	K02950	9525	NODE_21_length_173674_cov_16_583087	None	small subunit ribosomal protein S12
393	Acetatifactor_sp011959105	Acetatifactor_sp011959105	K02986	9388	NODE_21_length_173674_cov_16_583087	None	small subunit ribosomal protein S4
394	Acetatifactor_sp011959105	Acetatifactor_sp011959105	K02992	9526	NODE_21_length_173674_cov_16_583087	None	small subunit ribosomal protein S7
395	Acetatifactor_sp011959105	Acetatifactor_sp011959105	K02004	97	NODE_61_length_118937_cov_14_458236	None	putative ABC transport system permease protein
396	Acetatifactor_sp011959105	Acetatifactor_sp011959105	K02004	6244	NODE_167_length_73020_cov_15_007798	None	putative ABC transport system permease protein
397	Acetatifactor_sp011959105	Acetatifactor_sp011959105	K02004	7269	NODE_207_length_65192_cov_17_114190	None	putative ABC transport system permease protein
398	Acetatifactor_sp011959105	Acetatifactor_sp011959105	K02004	7270	NODE_207_length_65192_cov_17_114190	None	putative ABC transport system permease protein
399	Acetatifactor_sp011959105	Acetatifactor_sp011959105	K02004	23175	NODE_482_length_36746_cov_13_125835	None	putative ABC transport system permease protein
400	Acetatifactor_sp011959105	Acetatifactor_sp011959105	K02004	14331	NODE_15_length_192602_cov_15_584621	None	putative ABC transport system permease protein
401	Acetatifactor_sp011959105	Acetatifactor_sp011959105	K02004	29515	NODE_1643_length_13468_cov_13_897637	None	putative ABC transport system permease protein
402	Acetatifactor_sp011959105	Acetatifactor_sp011959105	K02004	140	NODE_298_length_51759_cov_14_301466	None	putative ABC transport system permease protein
403	Acetatifactor_sp011959105	Acetatifactor_sp011959105	K02004	145	NODE_298_length_51759_cov_14_301466	None	putative ABC transport system permease protein
404	Acetatifactor_sp011959105	Acetatifactor_sp011959105	K02004	146	NODE_298_length_51759_cov_14_301466	None	putative ABC transport system permease protein
405	Acetatifactor_sp011959105	Acetatifactor_sp011959105	K02004	6259	NODE_157_length_74937_cov_20_326313	None	putative ABC transport system permease protein
406	Acetatifactor_sp011959105	Acetatifactor_sp011959105	K02004	13460	NODE_41_length_132337_cov_18_822122	None	putative ABC transport system permease protein
407	Acetatifactor_sp011959105	Acetatifactor_sp011959105	K02004	16857	NODE_252_length_57645_cov_14_428165	None	putative ABC transport system permease protein
408	Acetatifactor_sp011959105	Acetatifactor_sp011959105	K02004	20122	NODE_13_length_205171_cov_15_453119	None	putative ABC transport system permease protein
409	Acetatifactor_sp011959105	Acetatifactor_sp011959105	K02004	9403	NODE_21_length_173674_cov_16_583087	None	putative ABC transport system permease protein
410	Acetatifactor_sp011959105	Acetatifactor_sp011959105	K02004	14332	NODE_15_length_192602_cov_15_584621	None	putative ABC transport system permease protein
411	Acetatifactor_sp011959105	Acetatifactor_sp011959105	K02004	6239	NODE_167_length_73020_cov_15_007798	None	putative ABC transport system permease protein
412	Acetatifactor_sp011959105	Acetatifactor_sp011959105	K02004	20031	NODE_13_length_205171_cov_15_453119	None	putative ABC transport system permease protein
413	Acetatifactor_sp011959105	Acetatifactor_sp011959105	K01914	9507	NODE_21_length_173674_cov_16_583087	None	aspartate--ammonia ligase [EC:6.3.1.1]
414	Acetatifactor_sp011959105	Acetatifactor_sp011959105	K02996	9399	NODE_21_length_173674_cov_16_583087	None	small subunit ribosomal protein S9
415	Acetatifactor_sp011959105	Acetatifactor_sp011959105	K02982	9367	NODE_21_length_173674_cov_16_583087	None	small subunit ribosomal protein S3
416	Acetatifactor_sp011959105	Acetatifactor_sp011959105	K03040	9389	NODE_21_length_173674_cov_16_583087	None	DNA-directed RNA polymerase subunit alpha [EC:2.7.7.6]
417	Acetatifactor_sp011959105	Acetatifactor_sp011959105	K00986	9565	NODE_234_length_60341_cov_12_095578	None	RNA-directed DNA polymerase [EC:2.7.7.49]
418	Acetatifactor_sp011959105	Acetatifactor_sp011959105	K02954	9374	NODE_21_length_173674_cov_16_583087	None	small subunit ribosomal protein S14
419	Acetatifactor_sp011959105	Acetatifactor_sp011959105	K01091	21729	NODE_2152_length_10921_cov_12_821185	None	phosphoglycolate phosphatase [EC:3.1.3.18]
420	Acetatifactor_sp011959105	Acetatifactor_sp011959105	K01091	9502	NODE_21_length_173674_cov_16_583087	None	phosphoglycolate phosphatase [EC:3.1.3.18]
421	Acetatifactor_sp011959105	Acetatifactor_sp011959105	K02003	6240	NODE_167_length_73020_cov_15_007798	None	putative ABC transport system ATP-binding protein
422	Acetatifactor_sp011959105	Acetatifactor_sp011959105	K02003	14330	NODE_15_length_192602_cov_15_584621	None	putative ABC transport system ATP-binding protein
423	Acetatifactor_sp011959105	Acetatifactor_sp011959105	K02003	6243	NODE_167_length_73020_cov_15_007798	None	putative ABC transport system ATP-binding protein
424	Acetatifactor_sp011959105	Acetatifactor_sp011959105	K02003	23174	NODE_482_length_36746_cov_13_125835	None	putative ABC transport system ATP-binding protein
425	Acetatifactor_sp011959105	Acetatifactor_sp011959105	K02003	29514	NODE_1643_length_13468_cov_13_897637	None	putative ABC transport system ATP-binding protein
426	Acetatifactor_sp011959105	Acetatifactor_sp011959105	K02003	141	NODE_298_length_51759_cov_14_301466	None	putative ABC transport system ATP-binding protein
427	Acetatifactor_sp011959105	Acetatifactor_sp011959105	K02003	144	NODE_298_length_51759_cov_14_301466	None	putative ABC transport system ATP-binding protein
428	Acetatifactor_sp011959105	Acetatifactor_sp011959105	K02003	6260	NODE_157_length_74937_cov_20_326313	None	putative ABC transport system ATP-binding protein
429	Acetatifactor_sp011959105	Acetatifactor_sp011959105	K02003	13461	NODE_41_length_132337_cov_18_822122	None	putative ABC transport system ATP-binding protein
430	Acetatifactor_sp011959105	Acetatifactor_sp011959105	K02003	16856	NODE_252_length_57645_cov_14_428165	None	putative ABC transport system ATP-binding protein
431	Acetatifactor_sp011959105	Acetatifactor_sp011959105	K02003	9402	NODE_21_length_173674_cov_16_583087	None	putative ABC transport system ATP-binding protein
432	Acetatifactor_sp011959105	Acetatifactor_sp011959105	K02003	95	NODE_61_length_118937_cov_14_458236	None	putative ABC transport system ATP-binding protein
433	Acetatifactor_sp011959105	Acetatifactor_sp011959105	K21023	34882	NODE_121_length_86585_cov_16_929389	None	diguanylate cyclase [EC:2.7.7.65]
434	Acetatifactor_sp011959105	Acetatifactor_sp011959105	K21023	9571	NODE_234_length_60341_cov_12_095578	None	diguanylate cyclase [EC:2.7.7.65]
435	Acetatifactor_sp011959105	Acetatifactor_sp011959105	K21023	31402	NODE_94_length_96797_cov_15_169771	None	diguanylate cyclase [EC:2.7.7.65]
436	Acetatifactor_sp011959105	Acetatifactor_sp011959105	K21023	1136	NODE_35_length_142391_cov_15_490389	None	diguanylate cyclase [EC:2.7.7.65]
437	Acetatifactor_sp011959105	Acetatifactor_sp011959105	K21023	31379	NODE_94_length_96797_cov_15_169771	None	diguanylate cyclase [EC:2.7.7.65]
438	Acetatifactor_sp011959105	Acetatifactor_sp011959105	K21023	26780	NODE_271_length_55077_cov_12_571444	None	diguanylate cyclase [EC:2.7.7.65]
439	Acetatifactor_sp011959105	Acetatifactor_sp011959105	K21023	12031	NODE_905_length_22491_cov_12_879881	None	diguanylate cyclase [EC:2.7.7.65]
440	Acetatifactor_sp011959105	Acetatifactor_sp011959105	K03043	9515	NODE_21_length_173674_cov_16_583087	None	DNA-directed RNA polymerase subunit beta [EC:2.7.7.6]
441	Acetatifactor_sp011959105	Acetatifactor_sp011959105	K02406	7306	NODE_207_length_65192_cov_17_114190	None	flagellin
442	Acetatifactor_sp011959105	Acetatifactor_sp011959105	K02406	21683	NODE_204_length_65612_cov_16_144515	None	flagellin
443	Acetatifactor_sp011959105	Acetatifactor_sp011959105	K02406	9407	NODE_21_length_173674_cov_16_583087	None	flagellin
444	Acetatifactor_sp011959105	Acetatifactor_sp011959105	K02994	9375	NODE_21_length_173674_cov_16_583087	None	small subunit ribosomal protein S8
445	Acetatifactor_sp011959105	Acetatifactor_sp011959105	K19294	37152	NODE_181_length_70068_cov_11_923186	None	alginate O-acetyltransferase complex protein AlgI
446	Acetatifactor_sp011959105	Acetatifactor_sp011959105	K19294	37194	NODE_181_length_70068_cov_11_923186	None	alginate O-acetyltransferase complex protein AlgI
447	Acetatifactor_sp011959105	Acetatifactor_sp011959105	K19294	14350	NODE_15_length_192602_cov_15_584621	None	alginate O-acetyltransferase complex protein AlgI
448	Acetatifactor_sp011959105	Acetatifactor_sp011959105	K19294	9396	NODE_21_length_173674_cov_16_583087	None	alginate O-acetyltransferase complex protein AlgI
449	Acetatifactor_sp011959105	Acetatifactor_sp011959105	K19294	7293	NODE_207_length_65192_cov_17_114190	None	alginate O-acetyltransferase complex protein AlgI
450	Acetatifactor_sp011959105	Acetatifactor_sp011959105	K19294	8342	NODE_132_length_82334_cov_15_986473	None	alginate O-acetyltransferase complex protein AlgI
451	Acetatifactor_sp011959105	Acetatifactor_sp011959105	K19294	21693	NODE_204_length_65612_cov_16_144515	None	alginate O-acetyltransferase complex protein AlgI
452	Acetatifactor_sp011959105	Acetatifactor_sp011959105	K02878	9368	NODE_21_length_173674_cov_16_583087	None	large subunit ribosomal protein L16
453	Acetatifactor_sp011959105	Acetatifactor_sp011959105	K01815	9581	NODE_234_length_60341_cov_12_095578	None	4-deoxy-L-threo-5-hexosulose-uronate ketol-isomerase [EC:5.3.1.17]
454	Acetatifactor_sp011959105	Acetatifactor_sp011959105	K08602	33272	NODE_240_length_59686_cov_12_128574	None	oligoendopeptidase F [EC:3.4.24.-]
455	Acetatifactor_sp011959105	Acetatifactor_sp011959105	K08602	9347	NODE_21_length_173674_cov_16_583087	None	oligoendopeptidase F [EC:3.4.24.-]
456	Acetatifactor_sp011959105	Acetatifactor_sp011959105	K08602	34926	NODE_121_length_86585_cov_16_929389	None	oligoendopeptidase F [EC:3.4.24.-]
457	Acetatifactor_sp011959105	Acetatifactor_sp011959105	K02886	9364	NODE_21_length_173674_cov_16_583087	None	large subunit ribosomal protein L2
458	Acetatifactor_sp011959105	Acetatifactor_sp011959105	K02892	9363	NODE_21_length_173674_cov_16_583087	None	large subunit ribosomal protein L23
459	Acetatifactor_sp011959105	Acetatifactor_sp011959105	K02879	9390	NODE_21_length_173674_cov_16_583087	None	large subunit ribosomal protein L17
460	Acetatifactor_sp011959105	Acetatifactor_sp011959105	K02931	9373	NODE_21_length_173674_cov_16_583087	None	large subunit ribosomal protein L5
461	Acetatifactor_sp011959105	Acetatifactor_sp011959105	K07485	9352	NODE_21_length_173674_cov_16_583087	None	transposase
462	Acetatifactor_sp011959105	Acetatifactor_sp011959105	K07485	9353	NODE_21_length_173674_cov_16_583087	None	transposase
463	Acetatifactor_sp011959105	Acetatifactor_sp011959105	K02933	9376	NODE_21_length_173674_cov_16_583087	None	large subunit ribosomal protein L6
464	Acetatifactor_sp011959105	Acetatifactor_sp011959105	K17319	6213	NODE_167_length_73020_cov_15_007798	None	putative aldouronate transport system permease protein
465	Acetatifactor_sp011959105	Acetatifactor_sp011959105	K17319	2349	NODE_950_length_21443_cov_12_445109	None	putative aldouronate transport system permease protein
466	Acetatifactor_sp011959105	Acetatifactor_sp011959105	K17319	24084	NODE_220_length_62708_cov_13_080475	None	putative aldouronate transport system permease protein
467	Acetatifactor_sp011959105	Acetatifactor_sp011959105	K17319	9588	NODE_234_length_60341_cov_12_095578	None	putative aldouronate transport system permease protein
468	Acetatifactor_sp011959105	Acetatifactor_sp011959105	K17319	20117	NODE_13_length_205171_cov_15_453119	None	putative aldouronate transport system permease protein
469	Acetatifactor_sp011959105	Acetatifactor_sp011959105	K17319	13496	NODE_41_length_132337_cov_18_822122	None	putative aldouronate transport system permease protein
470	Acetatifactor_sp011959105	Acetatifactor_sp011959105	K02890	9366	NODE_21_length_173674_cov_16_583087	None	large subunit ribosomal protein L22
471	Acetatifactor_sp011959105	Acetatifactor_sp011959105	K17318	6215	NODE_167_length_73020_cov_15_007798	None	putative aldouronate transport system substrate-binding protein
472	Acetatifactor_sp011959105	Acetatifactor_sp011959105	K17318	2350	NODE_950_length_21443_cov_12_445109	None	putative aldouronate transport system substrate-binding protein
473	Acetatifactor_sp011959105	Acetatifactor_sp011959105	K17318	9586	NODE_234_length_60341_cov_12_095578	None	putative aldouronate transport system substrate-binding protein
474	Acetatifactor_sp011959105	Acetatifactor_sp011959105	K17318	20115	NODE_13_length_205171_cov_15_453119	None	putative aldouronate transport system substrate-binding protein
475	Acetatifactor_sp011959105	Acetatifactor_sp011959105	K17318	24085	NODE_220_length_62708_cov_13_080475	None	putative aldouronate transport system substrate-binding protein
476	Acetatifactor_sp011959105	Acetatifactor_sp011959105	K17318	9589	NODE_234_length_60341_cov_12_095578	None	putative aldouronate transport system substrate-binding protein
477	Acetatifactor_sp011959105	Acetatifactor_sp011959105	K17318	13495	NODE_41_length_132337_cov_18_822122	None	putative aldouronate transport system substrate-binding protein
478	Acetatifactor_sp011959105	Acetatifactor_sp011959105	K02926	9362	NODE_21_length_173674_cov_16_583087	None	large subunit ribosomal protein L4
479	Acetatifactor_sp011959105	Acetatifactor_sp011959105	K17320	6214	NODE_167_length_73020_cov_15_007798	None	putative aldouronate transport system permease protein
480	Acetatifactor_sp011959105	Acetatifactor_sp011959105	K17320	2348	NODE_950_length_21443_cov_12_445109	None	putative aldouronate transport system permease protein
481	Acetatifactor_sp011959105	Acetatifactor_sp011959105	K17320	24083	NODE_220_length_62708_cov_13_080475	None	putative aldouronate transport system permease protein
482	Acetatifactor_sp011959105	Acetatifactor_sp011959105	K17320	20116	NODE_13_length_205171_cov_15_453119	None	putative aldouronate transport system permease protein
483	Acetatifactor_sp011959105	Acetatifactor_sp011959105	K17320	9587	NODE_234_length_60341_cov_12_095578	None	putative aldouronate transport system permease protein
484	Acetatifactor_sp011959105	Acetatifactor_sp011959105	K17320	13497	NODE_41_length_132337_cov_18_822122	None	putative aldouronate transport system permease protein
485	Acetatifactor_sp011959105	Acetatifactor_sp011959105	K02881	9377	NODE_21_length_173674_cov_16_583087	None	large subunit ribosomal protein L18
486	Acetatifactor_sp011959105	Acetatifactor_sp011959105	K02895	9372	NODE_21_length_173674_cov_16_583087	None	large subunit ribosomal protein L24
487	Acetatifactor_sp011959105	Acetatifactor_sp011959105	K01191	9584	NODE_234_length_60341_cov_12_095578	None	alpha-mannosidase [EC:3.2.1.24]
488	Acetatifactor_sp011959105	Acetatifactor_sp011959105	K01191	12060	NODE_304_length_51200_cov_16_892130	None	alpha-mannosidase [EC:3.2.1.24]
489	Acetatifactor_sp011959105	Acetatifactor_sp011959105	K06173	9395	NODE_21_length_173674_cov_16_583087	None	tRNA pseudouridine38-40 synthase [EC:5.4.99.12]
490	Acetatifactor_sp011959105	Acetatifactor_sp011959105	K06173	10750	NODE_38_length_136065_cov_13_341416	None	tRNA pseudouridine38-40 synthase [EC:5.4.99.12]
491	Acetatifactor_sp011959105	Acetatifactor_sp011959105	K01190	16864	NODE_252_length_57645_cov_14_428165	None	beta-galactosidase [EC:3.2.1.23]
492	Acetatifactor_sp011959105	Acetatifactor_sp011959105	K01190	14442	NODE_15_length_192602_cov_15_584621	None	beta-galactosidase [EC:3.2.1.23]
493	Acetatifactor_sp011959105	Acetatifactor_sp011959105	K01190	1196	NODE_35_length_142391_cov_15_490389	None	beta-galactosidase [EC:3.2.1.23]
494	Acetatifactor_sp011959105	Acetatifactor_sp011959105	K01190	1206	NODE_35_length_142391_cov_15_490389	None	beta-galactosidase [EC:3.2.1.23]
495	Acetatifactor_sp011959105	Acetatifactor_sp011959105	K01190	9498	NODE_21_length_173674_cov_16_583087	None	beta-galactosidase [EC:3.2.1.23]
496	Acetatifactor_sp011959105	Acetatifactor_sp011959105	K07052	8323	NODE_132_length_82334_cov_15_986473	None	uncharacterized protein
497	Acetatifactor_sp011959105	Acetatifactor_sp011959105	K07052	38118	NODE_180_length_70124_cov_13_959511	None	uncharacterized protein
498	Acetatifactor_sp011959105	Acetatifactor_sp011959105	K07052	32173	NODE_114_length_91042_cov_14_159297	None	uncharacterized protein
499	Acetatifactor_sp011959105	Acetatifactor_sp011959105	K07052	32144	NODE_114_length_91042_cov_14_159297	None	uncharacterized protein
500	Acetatifactor_sp011959105	Acetatifactor_sp011959105	K07052	13501	NODE_41_length_132337_cov_18_822122	None	uncharacterized protein
501	Acetatifactor_sp011959105	Acetatifactor_sp011959105	K07052	5310	NODE_1317_length_16298_cov_13_782614	None	uncharacterized protein
502	Acetatifactor_sp011959105	Acetatifactor_sp011959105	K07052	9502	NODE_21_length_173674_cov_16_583087	None	uncharacterized protein
503	Acetatifactor_sp011959105	Acetatifactor_sp011959105	K07720	1163	NODE_35_length_142391_cov_15_490389	None	two-component system, response regulator YesN
504	Acetatifactor_sp011959105	Acetatifactor_sp011959105	K07720	1195	NODE_35_length_142391_cov_15_490389	None	two-component system, response regulator YesN
505	Acetatifactor_sp011959105	Acetatifactor_sp011959105	K07720	2352	NODE_950_length_21443_cov_12_445109	None	two-component system, response regulator YesN
506	Acetatifactor_sp011959105	Acetatifactor_sp011959105	K07720	13494	NODE_41_length_132337_cov_18_822122	None	two-component system, response regulator YesN
507	Acetatifactor_sp011959105	Acetatifactor_sp011959105	K07720	9590	NODE_234_length_60341_cov_12_095578	None	two-component system, response regulator YesN
508	Acetatifactor_sp011959105	Acetatifactor_sp011959105	K03624	20147	NODE_13_length_205171_cov_15_453119	None	transcription elongation factor GreA
509	Acetatifactor_sp011959105	Acetatifactor_sp011959105	K03624	9501	NODE_21_length_173674_cov_16_583087	None	transcription elongation factor GreA
510	Acetatifactor_sp011959105	Acetatifactor_sp011959105	K07497	8250	NODE_320_length_49611_cov_17_172270	None	putative transposase
511	Acetatifactor_sp011959105	Acetatifactor_sp011959105	K07497	8251	NODE_320_length_49611_cov_17_172270	None	putative transposase
512	Acetatifactor_sp011959105	Acetatifactor_sp011959105	K07497	9445	NODE_21_length_173674_cov_16_583087	None	putative transposase
513	Acetatifactor_sp011959105	Acetatifactor_sp011959105	K02935	9514	NODE_21_length_173674_cov_16_583087	None	large subunit ribosomal protein L7/L12
514	Acetatifactor_sp011959105	Acetatifactor_sp011959105	K07464	19114	NODE_215_length_63614_cov_15_223509	None	CRISPR-associated exonuclease Cas4 [EC:3.1.12.1]
515	Acetatifactor_sp011959105	Acetatifactor_sp011959105	K02050	19174	NODE_577_length_31628_cov_12_718145	None	NitT/TauT family transport system permease protein
516	Acetatifactor_sp011959105	Acetatifactor_sp011959105	K02483	23172	NODE_482_length_36746_cov_13_125835	None	two-component system, OmpR family, response regulator
517	Acetatifactor_sp011959105	Acetatifactor_sp011959105	K02483	36296	NODE_213_length_64308_cov_13_756245	None	two-component system, OmpR family, response regulator
518	Acetatifactor_sp011959105	Acetatifactor_sp011959105	K02483	18028	NODE_30_length_149858_cov_15_556724	None	two-component system, OmpR family, response regulator
519	Acetatifactor_sp011959105	Acetatifactor_sp011959105	K02483	10828	NODE_2616_length_9507_cov_15_352518	None	two-component system, OmpR family, response regulator
520	Acetatifactor_sp011959105	Acetatifactor_sp011959105	K02483	37198	NODE_181_length_70068_cov_11_923186	None	two-component system, OmpR family, response regulator
521	Acetatifactor_sp011959105	Acetatifactor_sp011959105	K02483	143	NODE_298_length_51759_cov_14_301466	None	two-component system, OmpR family, response regulator
522	Acetatifactor_sp011959105	Acetatifactor_sp011959105	K02483	32177	NODE_114_length_91042_cov_14_159297	None	two-component system, OmpR family, response regulator
523	Acetatifactor_sp011959105	Acetatifactor_sp011959105	K02483	22	NODE_61_length_118937_cov_14_458236	None	two-component system, OmpR family, response regulator
524	Acetatifactor_sp011959105	Acetatifactor_sp011959105	K02483	19166	NODE_577_length_31628_cov_12_718145	None	two-component system, OmpR family, response regulator
525	Acetatifactor_sp011959105	Acetatifactor_sp011959105	K02483	4447	NODE_3762_length_7410_cov_17_833855	None	two-component system, OmpR family, response regulator
526	Acetatifactor_sp011959105	Acetatifactor_sp011959105	K21298	19141	NODE_215_length_63614_cov_15_223509	None	1,2-beta-oligoglucan phosphorylase [EC:2.4.1.333]
527	Acetatifactor_sp011959105	Acetatifactor_sp011959105	K03978	19178	NODE_577_length_31628_cov_12_718145	None	GTP-binding protein
528	Acetatifactor_sp011959105	Acetatifactor_sp011959105	K19117	19112	NODE_215_length_63614_cov_15_223509	None	CRISPR-associated protein Csd1
529	Acetatifactor_sp011959105	Acetatifactor_sp011959105	K01639	19133	NODE_215_length_63614_cov_15_223509	None	N-acetylneuraminate lyase [EC:4.1.3.3]
530	Acetatifactor_sp011959105	Acetatifactor_sp011959105	K07105	19138	NODE_215_length_63614_cov_15_223509	None	uncharacterized protein
531	Acetatifactor_sp011959105	Acetatifactor_sp011959105	K04343	19188	NODE_577_length_31628_cov_12_718145	None	streptomycin 6-kinase [EC:2.7.1.72]
532	Acetatifactor_sp011959105	Acetatifactor_sp011959105	K01788	19134	NODE_215_length_63614_cov_15_223509	None	N-acylglucosamine-6-phosphate 2-epimerase [EC:5.1.3.9]
533	Acetatifactor_sp011959105	Acetatifactor_sp011959105	K02027	34912	NODE_121_length_86585_cov_16_929389	None	multiple sugar transport system substrate-binding protein
534	Acetatifactor_sp011959105	Acetatifactor_sp011959105	K02027	32161	NODE_114_length_91042_cov_14_159297	None	multiple sugar transport system substrate-binding protein
535	Acetatifactor_sp011959105	Acetatifactor_sp011959105	K02027	1218	NODE_35_length_142391_cov_15_490389	None	multiple sugar transport system substrate-binding protein
536	Acetatifactor_sp011959105	Acetatifactor_sp011959105	K02027	19143	NODE_215_length_63614_cov_15_223509	None	multiple sugar transport system substrate-binding protein
537	Acetatifactor_sp011959105	Acetatifactor_sp011959105	K02027	19144	NODE_215_length_63614_cov_15_223509	None	multiple sugar transport system substrate-binding protein
538	Acetatifactor_sp011959105	Acetatifactor_sp011959105	K02027	14475	NODE_15_length_192602_cov_15_584621	None	multiple sugar transport system substrate-binding protein
539	Acetatifactor_sp011959105	Acetatifactor_sp011959105	K02027	12044	NODE_304_length_51200_cov_16_892130	None	multiple sugar transport system substrate-binding protein
540	Acetatifactor_sp011959105	Acetatifactor_sp011959105	K02027	12052	NODE_304_length_51200_cov_16_892130	None	multiple sugar transport system substrate-binding protein
541	Acetatifactor_sp011959105	Acetatifactor_sp011959105	K02027	19129	NODE_215_length_63614_cov_15_223509	None	multiple sugar transport system substrate-binding protein
542	Acetatifactor_sp011959105	Acetatifactor_sp011959105	K02027	92	NODE_61_length_118937_cov_14_458236	None	multiple sugar transport system substrate-binding protein
543	Acetatifactor_sp011959105	Acetatifactor_sp011959105	K02026	32160	NODE_114_length_91042_cov_14_159297	None	multiple sugar transport system permease protein
544	Acetatifactor_sp011959105	Acetatifactor_sp011959105	K02026	5313	NODE_1317_length_16298_cov_13_782614	None	multiple sugar transport system permease protein
545	Acetatifactor_sp011959105	Acetatifactor_sp011959105	K02026	19169	NODE_577_length_31628_cov_12_718145	None	multiple sugar transport system permease protein
546	Acetatifactor_sp011959105	Acetatifactor_sp011959105	K02026	34914	NODE_121_length_86585_cov_16_929389	None	multiple sugar transport system permease protein
547	Acetatifactor_sp011959105	Acetatifactor_sp011959105	K02026	14473	NODE_15_length_192602_cov_15_584621	None	multiple sugar transport system permease protein
548	Acetatifactor_sp011959105	Acetatifactor_sp011959105	K02026	19146	NODE_215_length_63614_cov_15_223509	None	multiple sugar transport system permease protein
549	Acetatifactor_sp011959105	Acetatifactor_sp011959105	K02026	12046	NODE_304_length_51200_cov_16_892130	None	multiple sugar transport system permease protein
550	Acetatifactor_sp011959105	Acetatifactor_sp011959105	K02026	19150	NODE_215_length_63614_cov_15_223509	None	multiple sugar transport system permease protein
551	Acetatifactor_sp011959105	Acetatifactor_sp011959105	K02026	12051	NODE_304_length_51200_cov_16_892130	None	multiple sugar transport system permease protein
552	Acetatifactor_sp011959105	Acetatifactor_sp011959105	K02026	84	NODE_61_length_118937_cov_14_458236	None	multiple sugar transport system permease protein
553	Acetatifactor_sp011959105	Acetatifactor_sp011959105	K02026	90	NODE_61_length_118937_cov_14_458236	None	multiple sugar transport system permease protein
554	Acetatifactor_sp011959105	Acetatifactor_sp011959105	K02026	19131	NODE_215_length_63614_cov_15_223509	None	multiple sugar transport system permease protein
555	Acetatifactor_sp011959105	Acetatifactor_sp011959105	K09951	15641	NODE_164_length_73312_cov_12_071474	None	CRISPR-associated protein Cas2
556	Acetatifactor_sp011959105	Acetatifactor_sp011959105	K09951	33283	NODE_240_length_59686_cov_12_128574	None	CRISPR-associated protein Cas2
557	Acetatifactor_sp011959105	Acetatifactor_sp011959105	K09951	19116	NODE_215_length_63614_cov_15_223509	None	CRISPR-associated protein Cas2
558	Acetatifactor_sp011959105	Acetatifactor_sp011959105	K02025	5312	NODE_1317_length_16298_cov_13_782614	None	multiple sugar transport system permease protein
559	Acetatifactor_sp011959105	Acetatifactor_sp011959105	K02025	19168	NODE_577_length_31628_cov_12_718145	None	multiple sugar transport system permease protein
560	Acetatifactor_sp011959105	Acetatifactor_sp011959105	K02025	34913	NODE_121_length_86585_cov_16_929389	None	multiple sugar transport system permease protein
561	Acetatifactor_sp011959105	Acetatifactor_sp011959105	K02025	1219	NODE_35_length_142391_cov_15_490389	None	multiple sugar transport system permease protein
562	Acetatifactor_sp011959105	Acetatifactor_sp011959105	K02025	19145	NODE_215_length_63614_cov_15_223509	None	multiple sugar transport system permease protein
563	Acetatifactor_sp011959105	Acetatifactor_sp011959105	K02025	14474	NODE_15_length_192602_cov_15_584621	None	multiple sugar transport system permease protein
564	Acetatifactor_sp011959105	Acetatifactor_sp011959105	K02025	12045	NODE_304_length_51200_cov_16_892130	None	multiple sugar transport system permease protein
565	Acetatifactor_sp011959105	Acetatifactor_sp011959105	K02025	19130	NODE_215_length_63614_cov_15_223509	None	multiple sugar transport system permease protein
566	Acetatifactor_sp011959105	Acetatifactor_sp011959105	K02025	91	NODE_61_length_118937_cov_14_458236	None	multiple sugar transport system permease protein
567	Acetatifactor_sp011959105	Acetatifactor_sp011959105	K02025	32159	NODE_114_length_91042_cov_14_159297	None	multiple sugar transport system permease protein
568	Acetatifactor_sp011959105	Acetatifactor_sp011959105	K07012	19110	NODE_215_length_63614_cov_15_223509	None	CRISPR-associated endonuclease/helicase Cas3 [EC:3.1.-.- 3.6.4.-]
569	Acetatifactor_sp011959105	Acetatifactor_sp011959105	K01270	19183	NODE_577_length_31628_cov_12_718145	None	dipeptidase D [EC:3.4.13.-]
570	Acetatifactor_sp011959105	Acetatifactor_sp011959105	K15342	19115	NODE_215_length_63614_cov_15_223509	None	CRISP-associated protein Cas1
571	Acetatifactor_sp011959105	Acetatifactor_sp011959105	K02574	21720	NODE_204_length_65612_cov_16_144515	None	ferredoxin-type protein NapH
572	Acetatifactor_sp011959105	Acetatifactor_sp011959105	K02574	19140	NODE_215_length_63614_cov_15_223509	None	ferredoxin-type protein NapH
573	Acetatifactor_sp011959105	Acetatifactor_sp011959105	K23237	19108	NODE_215_length_63614_cov_15_223509	None	AraC family transcriptional regulator, melibiose operon regulatory protein
574	Acetatifactor_sp011959105	Acetatifactor_sp011959105	K23237	20119	NODE_13_length_205171_cov_15_453119	None	AraC family transcriptional regulator, melibiose operon regulatory protein
575	Acetatifactor_sp011959105	Acetatifactor_sp011959105	K02564	19128	NODE_215_length_63614_cov_15_223509	None	glucosamine-6-phosphate deaminase [EC:3.5.99.6]
576	Acetatifactor_sp011959105	Acetatifactor_sp011959105	K02564	20114	NODE_13_length_205171_cov_15_453119	None	glucosamine-6-phosphate deaminase [EC:3.5.99.6]
577	Acetatifactor_sp011959105	Acetatifactor_sp011959105	K02564	2351	NODE_950_length_21443_cov_12_445109	None	glucosamine-6-phosphate deaminase [EC:3.5.99.6]
578	Acetatifactor_sp011959105	Acetatifactor_sp011959105	K01443	20111	NODE_13_length_205171_cov_15_453119	None	N-acetylglucosamine-6-phosphate deacetylase [EC:3.5.1.25]
579	Acetatifactor_sp011959105	Acetatifactor_sp011959105	K01443	2343	NODE_950_length_21443_cov_12_445109	None	N-acetylglucosamine-6-phosphate deacetylase [EC:3.5.1.25]
580	Acetatifactor_sp011959105	Acetatifactor_sp011959105	K01443	19127	NODE_215_length_63614_cov_15_223509	None	N-acetylglucosamine-6-phosphate deacetylase [EC:3.5.1.25]
581	Acetatifactor_sp011959105	Acetatifactor_sp011959105	K02529	14467	NODE_15_length_192602_cov_15_584621	None	LacI family transcriptional regulator
582	Acetatifactor_sp011959105	Acetatifactor_sp011959105	K02529	15592	NODE_164_length_73312_cov_12_071474	None	LacI family transcriptional regulator
583	Acetatifactor_sp011959105	Acetatifactor_sp011959105	K02529	24138	NODE_220_length_62708_cov_13_080475	None	LacI family transcriptional regulator
584	Acetatifactor_sp011959105	Acetatifactor_sp011959105	K02529	19152	NODE_215_length_63614_cov_15_223509	None	LacI family transcriptional regulator
585	Acetatifactor_sp011959105	Acetatifactor_sp011959105	K02529	38099	NODE_180_length_70124_cov_13_959511	None	LacI family transcriptional regulator
586	Acetatifactor_sp011959105	Acetatifactor_sp011959105	K02529	13465	NODE_41_length_132337_cov_18_822122	None	LacI family transcriptional regulator
587	Acetatifactor_sp011959105	Acetatifactor_sp011959105	K02529	12063	NODE_304_length_51200_cov_16_892130	None	LacI family transcriptional regulator
588	Acetatifactor_sp011959105	Acetatifactor_sp011959105	K19334	19132	NODE_215_length_63614_cov_15_223509	None	biofilm protein TabA
589	Acetatifactor_sp011959105	Acetatifactor_sp011959105	K19118	19113	NODE_215_length_63614_cov_15_223509	None	CRISPR-associated protein Csd2
590	Acetatifactor_sp011959105	Acetatifactor_sp011959105	K03544	14336	NODE_15_length_192602_cov_15_584621	None	ATP-dependent Clp protease ATP-binding subunit ClpX
591	Acetatifactor_sp011959105	Acetatifactor_sp011959105	K03544	19177	NODE_577_length_31628_cov_12_718145	None	ATP-dependent Clp protease ATP-binding subunit ClpX
592	Acetatifactor_sp011959105	Acetatifactor_sp011959105	K03545	18071	NODE_30_length_149858_cov_15_556724	None	trigger factor
593	Acetatifactor_sp011959105	Acetatifactor_sp011959105	K03545	19175	NODE_577_length_31628_cov_12_718145	None	trigger factor
594	Acetatifactor_sp011959105	Acetatifactor_sp011959105	K19119	19111	NODE_215_length_63614_cov_15_223509	None	CRISPR-associated protein Cas5d
595	Acetatifactor_sp011959105	Acetatifactor_sp011959105	K03412	31433	NODE_94_length_96797_cov_15_169771	None	two-component system, chemotaxis family, protein-glutamate methylesterase/glutaminase [EC:3.1.1.61 3.5.1.44]
596	Acetatifactor_sp011959105	Acetatifactor_sp011959105	K03412	10701	NODE_38_length_136065_cov_13_341416	None	two-component system, chemotaxis family, protein-glutamate methylesterase/glutaminase [EC:3.1.1.61 3.5.1.44]
597	Acetatifactor_sp011959105	Acetatifactor_sp011959105	K17472	31420	NODE_94_length_96797_cov_15_169771	None	Rrf2 family transcriptional regulator, cysteine metabolism repressor
598	Acetatifactor_sp011959105	Acetatifactor_sp011959105	K03407	10700	NODE_38_length_136065_cov_13_341416	None	two-component system, chemotaxis family, sensor kinase CheA [EC:2.7.13.3]
599	Acetatifactor_sp011959105	Acetatifactor_sp011959105	K03407	31431	NODE_94_length_96797_cov_15_169771	None	two-component system, chemotaxis family, sensor kinase CheA [EC:2.7.13.3]
600	Acetatifactor_sp011959105	Acetatifactor_sp011959105	K00078	31372	NODE_94_length_96797_cov_15_169771	None	dihydrodiol dehydrogenase / D-xylose 1-dehydrogenase (NADP) [EC:1.3.1.20 1.1.1.179]
601	Acetatifactor_sp011959105	Acetatifactor_sp011959105	K02435	31357	NODE_94_length_96797_cov_15_169771	None	aspartyl-tRNA(Asn)/glutamyl-tRNA(Gln) amidotransferase subunit C [EC:6.3.5.6 6.3.5.7]
602	Acetatifactor_sp011959105	Acetatifactor_sp011959105	K03930	31377	NODE_94_length_96797_cov_15_169771	None	putative tributyrin esterase [EC:3.1.1.-]
603	Acetatifactor_sp011959105	Acetatifactor_sp011959105	K03930	30677	NODE_98_length_96321_cov_12_702356	None	putative tributyrin esterase [EC:3.1.1.-]
604	Acetatifactor_sp011959105	Acetatifactor_sp011959105	K03101	31425	NODE_94_length_96797_cov_15_169771	None	signal peptidase II [EC:3.4.23.36]
605	Acetatifactor_sp011959105	Acetatifactor_sp011959105	K03101	30742	NODE_98_length_96321_cov_12_702356	None	signal peptidase II [EC:3.4.23.36]
606	Acetatifactor_sp011959105	Acetatifactor_sp011959105	K09955	31419	NODE_94_length_96797_cov_15_169771	None	uncharacterized protein
607	Acetatifactor_sp011959105	Acetatifactor_sp011959105	K09955	13510	NODE_3771_length_7398_cov_15_746834	None	uncharacterized protein
608	Acetatifactor_sp011959105	Acetatifactor_sp011959105	K04083	31383	NODE_94_length_96797_cov_15_169771	None	molecular chaperone Hsp33
609	Acetatifactor_sp011959105	Acetatifactor_sp011959105	K06871	31368	NODE_94_length_96797_cov_15_169771	None	uncharacterized protein
610	Acetatifactor_sp011959105	Acetatifactor_sp011959105	K06871	20207	NODE_645_length_28654_cov_14_481835	None	uncharacterized protein
611	Acetatifactor_sp011959105	Acetatifactor_sp011959105	K06871	31366	NODE_94_length_96797_cov_15_169771	None	uncharacterized protein
612	Acetatifactor_sp011959105	Acetatifactor_sp011959105	K06871	2326	NODE_302_length_51364_cov_13_428170	None	uncharacterized protein
613	Acetatifactor_sp011959105	Acetatifactor_sp011959105	K07814	20067	NODE_13_length_205171_cov_15_453119	None	putative two-component system response regulator
614	Acetatifactor_sp011959105	Acetatifactor_sp011959105	K07814	31435	NODE_94_length_96797_cov_15_169771	None	putative two-component system response regulator
615	Acetatifactor_sp011959105	Acetatifactor_sp011959105	K07814	31437	NODE_94_length_96797_cov_15_169771	None	putative two-component system response regulator
616	Acetatifactor_sp011959105	Acetatifactor_sp011959105	K07814	24120	NODE_220_length_62708_cov_13_080475	None	putative two-component system response regulator
617	Acetatifactor_sp011959105	Acetatifactor_sp011959105	K07814	32157	NODE_114_length_91042_cov_14_159297	None	putative two-component system response regulator
618	Acetatifactor_sp011959105	Acetatifactor_sp011959105	K03327	16866	NODE_252_length_57645_cov_14_428165	None	multidrug resistance protein, MATE family
619	Acetatifactor_sp011959105	Acetatifactor_sp011959105	K03327	32163	NODE_114_length_91042_cov_14_159297	None	multidrug resistance protein, MATE family
620	Acetatifactor_sp011959105	Acetatifactor_sp011959105	K03327	38116	NODE_180_length_70124_cov_13_959511	None	multidrug resistance protein, MATE family
621	Acetatifactor_sp011959105	Acetatifactor_sp011959105	K03327	12067	NODE_304_length_51200_cov_16_892130	None	multidrug resistance protein, MATE family
622	Acetatifactor_sp011959105	Acetatifactor_sp011959105	K03327	138	NODE_298_length_51759_cov_14_301466	None	multidrug resistance protein, MATE family
623	Acetatifactor_sp011959105	Acetatifactor_sp011959105	K03327	31404	NODE_94_length_96797_cov_15_169771	None	multidrug resistance protein, MATE family
624	Acetatifactor_sp011959105	Acetatifactor_sp011959105	K03327	32112	NODE_114_length_91042_cov_14_159297	None	multidrug resistance protein, MATE family
625	Acetatifactor_sp011959105	Acetatifactor_sp011959105	K03327	31391	NODE_94_length_96797_cov_15_169771	None	multidrug resistance protein, MATE family
626	Acetatifactor_sp011959105	Acetatifactor_sp011959105	K03327	6227	NODE_167_length_73020_cov_15_007798	None	multidrug resistance protein, MATE family
627	Acetatifactor_sp011959105	Acetatifactor_sp011959105	K03327	30676	NODE_98_length_96321_cov_12_702356	None	multidrug resistance protein, MATE family
628	Acetatifactor_sp011959105	Acetatifactor_sp011959105	K03327	36341	NODE_213_length_64308_cov_13_756245	None	multidrug resistance protein, MATE family
629	Acetatifactor_sp011959105	Acetatifactor_sp011959105	K03327	14454	NODE_15_length_192602_cov_15_584621	None	multidrug resistance protein, MATE family
630	Acetatifactor_sp011959105	Acetatifactor_sp011959105	K03327	36310	NODE_213_length_64308_cov_13_756245	None	multidrug resistance protein, MATE family
631	Acetatifactor_sp011959105	Acetatifactor_sp011959105	K03327	31414	NODE_94_length_96797_cov_15_169771	None	multidrug resistance protein, MATE family
632	Acetatifactor_sp011959105	Acetatifactor_sp011959105	K03327	26781	NODE_271_length_55077_cov_12_571444	None	multidrug resistance protein, MATE family
633	Acetatifactor_sp011959105	Acetatifactor_sp011959105	K03327	16895	NODE_252_length_57645_cov_14_428165	None	multidrug resistance protein, MATE family
634	Acetatifactor_sp011959105	Acetatifactor_sp011959105	K13643	31420	NODE_94_length_96797_cov_15_169771	None	Rrf2 family transcriptional regulator, iron-sulfur cluster assembly transcription factor
635	Acetatifactor_sp011959105	Acetatifactor_sp011959105	K03929	31405	NODE_94_length_96797_cov_15_169771	None	para-nitrobenzyl esterase [EC:3.1.1.-]
636	Acetatifactor_sp011959105	Acetatifactor_sp011959105	K00575	31434	NODE_94_length_96797_cov_15_169771	None	chemotaxis protein methyltransferase CheR [EC:2.1.1.80]
637	Acetatifactor_sp011959105	Acetatifactor_sp011959105	K00575	37183	NODE_181_length_70068_cov_11_923186	None	chemotaxis protein methyltransferase CheR [EC:2.1.1.80]
638	Acetatifactor_sp011959105	Acetatifactor_sp011959105	K21744	31376	NODE_94_length_96797_cov_15_169771	None	MerR family transcriptional regulator, thiopeptide resistance regulator
639	Acetatifactor_sp011959105	Acetatifactor_sp011959105	K21744	16870	NODE_252_length_57645_cov_14_428165	None	MerR family transcriptional regulator, thiopeptide resistance regulator
640	Acetatifactor_sp011959105	Acetatifactor_sp011959105	K21744	21703	NODE_204_length_65612_cov_16_144515	None	MerR family transcriptional regulator, thiopeptide resistance regulator
641	Acetatifactor_sp011959105	Acetatifactor_sp011959105	K23518	31371	NODE_94_length_96797_cov_15_169771	None	O-acetyl-ADP-ribose deacetylase [EC:3.1.1.106]
642	Acetatifactor_sp011959105	Acetatifactor_sp011959105	K03408	10699	NODE_38_length_136065_cov_13_341416	None	purine-binding chemotaxis protein CheW
643	Acetatifactor_sp011959105	Acetatifactor_sp011959105	K03408	31430	NODE_94_length_96797_cov_15_169771	None	purine-binding chemotaxis protein CheW
644	Acetatifactor_sp011959105	Acetatifactor_sp011959105	K01209	34922	NODE_121_length_86585_cov_16_929389	None	alpha-L-arabinofuranosidase [EC:3.2.1.55]
645	Acetatifactor_sp011959105	Acetatifactor_sp011959105	K01209	31406	NODE_94_length_96797_cov_15_169771	None	alpha-L-arabinofuranosidase [EC:3.2.1.55]
646	Acetatifactor_sp011959105	Acetatifactor_sp011959105	K01209	34911	NODE_121_length_86585_cov_16_929389	None	alpha-L-arabinofuranosidase [EC:3.2.1.55]
647	Acetatifactor_sp011959105	Acetatifactor_sp011959105	K01181	12072	NODE_304_length_51200_cov_16_892130	None	endo-1,4-beta-xylanase [EC:3.2.1.8]
648	Acetatifactor_sp011959105	Acetatifactor_sp011959105	K01181	31369	NODE_94_length_96797_cov_15_169771	None	endo-1,4-beta-xylanase [EC:3.2.1.8]
649	Acetatifactor_sp011959105	Acetatifactor_sp011959105	K01181	6232	NODE_167_length_73020_cov_15_007798	None	endo-1,4-beta-xylanase [EC:3.2.1.8]
650	Acetatifactor_sp011959105	Acetatifactor_sp011959105	K01181	34937	NODE_121_length_86585_cov_16_929389	None	endo-1,4-beta-xylanase [EC:3.2.1.8]
651	Acetatifactor_sp011959105	Acetatifactor_sp011959105	K01181	6201	NODE_167_length_73020_cov_15_007798	None	endo-1,4-beta-xylanase [EC:3.2.1.8]
652	Acetatifactor_sp011959105	Acetatifactor_sp011959105	K01426	31356	NODE_94_length_96797_cov_15_169771	None	amidase [EC:3.5.1.4]
653	Acetatifactor_sp011959105	Acetatifactor_sp011959105	K03976	31378	NODE_94_length_96797_cov_15_169771	None	Cys-tRNA(Pro)/Cys-tRNA(Cys) deacylase [EC:3.1.1.-]
654	Acetatifactor_sp011959105	Acetatifactor_sp011959105	K02939	17966	NODE_30_length_149858_cov_15_556724	None	large subunit ribosomal protein L9
655	Acetatifactor_sp011959105	Acetatifactor_sp011959105	K00656	17973	NODE_30_length_149858_cov_15_556724	None	formate C-acetyltransferase [EC:2.3.1.54]
656	Acetatifactor_sp011959105	Acetatifactor_sp011959105	K07566	17979	NODE_30_length_149858_cov_15_556724	None	L-threonylcarbamoyladenylate synthase [EC:2.7.7.87]
657	Acetatifactor_sp011959105	Acetatifactor_sp011959105	K03111	17961	NODE_30_length_149858_cov_15_556724	None	single-strand DNA-binding protein
658	Acetatifactor_sp011959105	Acetatifactor_sp011959105	K03111	2307	NODE_302_length_51364_cov_13_428170	None	single-strand DNA-binding protein
659	Acetatifactor_sp011959105	Acetatifactor_sp011959105	K03111	15647	NODE_164_length_73312_cov_12_071474	None	single-strand DNA-binding protein
660	Acetatifactor_sp011959105	Acetatifactor_sp011959105	K01448	30700	NODE_98_length_96321_cov_12_702356	None	N-acetylmuramoyl-L-alanine amidase [EC:3.5.1.28]
661	Acetatifactor_sp011959105	Acetatifactor_sp011959105	K01448	7246	NODE_637_length_28929_cov_14_935721	None	N-acetylmuramoyl-L-alanine amidase [EC:3.5.1.28]
662	Acetatifactor_sp011959105	Acetatifactor_sp011959105	K01448	17978	NODE_30_length_149858_cov_15_556724	None	N-acetylmuramoyl-L-alanine amidase [EC:3.5.1.28]
663	Acetatifactor_sp011959105	Acetatifactor_sp011959105	K01448	38106	NODE_180_length_70124_cov_13_959511	None	N-acetylmuramoyl-L-alanine amidase [EC:3.5.1.28]
664	Acetatifactor_sp011959105	Acetatifactor_sp011959105	K01448	2334	NODE_302_length_51364_cov_13_428170	None	N-acetylmuramoyl-L-alanine amidase [EC:3.5.1.28]
665	Acetatifactor_sp011959105	Acetatifactor_sp011959105	K01448	8319	NODE_132_length_82334_cov_15_986473	None	N-acetylmuramoyl-L-alanine amidase [EC:3.5.1.28]
666	Acetatifactor_sp011959105	Acetatifactor_sp011959105	K04069	12065	NODE_304_length_51200_cov_16_892130	None	pyruvate formate lyase activating enzyme [EC:1.97.1.4]
667	Acetatifactor_sp011959105	Acetatifactor_sp011959105	K04069	17970	NODE_30_length_149858_cov_15_556724	None	pyruvate formate lyase activating enzyme [EC:1.97.1.4]
668	Acetatifactor_sp011959105	Acetatifactor_sp011959105	K04069	20179	NODE_13_length_205171_cov_15_453119	None	pyruvate formate lyase activating enzyme [EC:1.97.1.4]
669	Acetatifactor_sp011959105	Acetatifactor_sp011959105	K01449	37195	NODE_181_length_70068_cov_11_923186	None	N-acetylmuramoyl-L-alanine amidase [EC:3.5.1.28]
670	Acetatifactor_sp011959105	Acetatifactor_sp011959105	K01449	15643	NODE_164_length_73312_cov_12_071474	None	N-acetylmuramoyl-L-alanine amidase [EC:3.5.1.28]
671	Acetatifactor_sp011959105	Acetatifactor_sp011959105	K01449	20156	NODE_13_length_205171_cov_15_453119	None	N-acetylmuramoyl-L-alanine amidase [EC:3.5.1.28]
672	Acetatifactor_sp011959105	Acetatifactor_sp011959105	K01449	17983	NODE_30_length_149858_cov_15_556724	None	N-acetylmuramoyl-L-alanine amidase [EC:3.5.1.28]
673	Acetatifactor_sp011959105	Acetatifactor_sp011959105	K02963	17962	NODE_30_length_149858_cov_15_556724	None	small subunit ribosomal protein S18
674	Acetatifactor_sp011959105	Acetatifactor_sp011959105	K02990	17960	NODE_30_length_149858_cov_15_556724	None	small subunit ribosomal protein S6
675	Acetatifactor_sp011959105	Acetatifactor_sp011959105	K01493	17982	NODE_30_length_149858_cov_15_556724	None	dCMP deaminase [EC:3.5.4.12]
676	Acetatifactor_sp011959105	Acetatifactor_sp011959105	K09145	17984	NODE_30_length_149858_cov_15_556724	None	uncharacterized protein
677	Acetatifactor_sp011959105	Acetatifactor_sp011959105	K16511	10833	NODE_2616_length_9507_cov_15_352518	None	adapter protein MecA 1/2
678	Acetatifactor_sp011959105	Acetatifactor_sp011959105	K16511	17975	NODE_30_length_149858_cov_15_556724	None	adapter protein MecA 1/2
679	Acetatifactor_sp011959105	Acetatifactor_sp011959105	K22927	17965	NODE_30_length_149858_cov_15_556724	None	cyclic-di-AMP phosphodiesterase [EC:3.1.4.59]
680	Acetatifactor_sp011959105	Acetatifactor_sp011959105	K00761	17981	NODE_30_length_149858_cov_15_556724	None	uracil phosphoribosyltransferase [EC:2.4.2.9]
681	Acetatifactor_sp011959105	Acetatifactor_sp011959105	K02314	17967	NODE_30_length_149858_cov_15_556724	None	replicative DNA helicase [EC:3.6.4.12]
682	Acetatifactor_sp011959105	Acetatifactor_sp011959105	K02116	17985	NODE_30_length_149858_cov_15_556724	None	ATP synthase protein I
683	Acetatifactor_sp011959105	Acetatifactor_sp011959105	K12257	2325	NODE_302_length_51364_cov_13_428170	None	SecD/SecF fusion protein
684	Acetatifactor_sp011959105	Acetatifactor_sp011959105	K07507	2340	NODE_950_length_21443_cov_12_445109	None	putative Mg2+ transporter-C (MgtC) family protein
685	Acetatifactor_sp011959105	Acetatifactor_sp011959105	K18231	2333	NODE_302_length_51364_cov_13_428170	None	macrolide transport system ATP-binding/permease protein
686	Acetatifactor_sp011959105	Acetatifactor_sp011959105	K09013	2318	NODE_302_length_51364_cov_13_428170	None	Fe-S cluster assembly ATP-binding protein
687	Acetatifactor_sp011959105	Acetatifactor_sp011959105	K03699	2329	NODE_302_length_51364_cov_13_428170	None	putative hemolysin
688	Acetatifactor_sp011959105	Acetatifactor_sp011959105	K03699	10791	NODE_38_length_136065_cov_13_341416	None	putative hemolysin
689	Acetatifactor_sp011959105	Acetatifactor_sp011959105	K03704	2299	NODE_302_length_51364_cov_13_428170	None	cold shock protein
690	Acetatifactor_sp011959105	Acetatifactor_sp011959105	K03324	36332	NODE_213_length_64308_cov_13_756245	None	phosphate:Na+ symporter
691	Acetatifactor_sp011959105	Acetatifactor_sp011959105	K03324	2332	NODE_302_length_51364_cov_13_428170	None	phosphate:Na+ symporter
692	Acetatifactor_sp011959105	Acetatifactor_sp011959105	K03324	14502	NODE_827_length_23923_cov_13_399698	None	phosphate:Na+ symporter
693	Acetatifactor_sp011959105	Acetatifactor_sp011959105	K01179	50	NODE_61_length_118937_cov_14_458236	None	endoglucanase [EC:3.2.1.4]
694	Acetatifactor_sp011959105	Acetatifactor_sp011959105	K01179	2311	NODE_302_length_51364_cov_13_428170	None	endoglucanase [EC:3.2.1.4]
695	Acetatifactor_sp011959105	Acetatifactor_sp011959105	K19092	2335	NODE_302_length_51364_cov_13_428170	None	toxin ParE1/3/4
696	Acetatifactor_sp011959105	Acetatifactor_sp011959105	K06207	2308	NODE_302_length_51364_cov_13_428170	None	GTP-binding protein
697	Acetatifactor_sp011959105	Acetatifactor_sp011959105	K06168	25771	NODE_185_length_69401_cov_11_534349	None	tRNA-2-methylthio-N6-dimethylallyladenosine synthase [EC:2.8.4.3]
698	Acetatifactor_sp011959105	Acetatifactor_sp011959105	K14340	25754	NODE_185_length_69401_cov_11_534349	None	mannosyltransferase [EC:2.4.1.-]
699	Acetatifactor_sp011959105	Acetatifactor_sp011959105	K14340	14426	NODE_15_length_192602_cov_15_584621	None	mannosyltransferase [EC:2.4.1.-]
700	Acetatifactor_sp011959105	Acetatifactor_sp011959105	K02033	23168	NODE_482_length_36746_cov_13_125835	None	peptide/nickel transport system permease protein
701	Acetatifactor_sp011959105	Acetatifactor_sp011959105	K02033	25793	NODE_185_length_69401_cov_11_534349	None	peptide/nickel transport system permease protein
702	Acetatifactor_sp011959105	Acetatifactor_sp011959105	K02032	23171	NODE_482_length_36746_cov_13_125835	None	peptide/nickel transport system ATP-binding protein
703	Acetatifactor_sp011959105	Acetatifactor_sp011959105	K02032	25796	NODE_185_length_69401_cov_11_534349	None	peptide/nickel transport system ATP-binding protein
704	Acetatifactor_sp011959105	Acetatifactor_sp011959105	K01934	25775	NODE_185_length_69401_cov_11_534349	None	5-formyltetrahydrofolate cyclo-ligase [EC:6.3.3.2]
705	Acetatifactor_sp011959105	Acetatifactor_sp011959105	K02031	25795	NODE_185_length_69401_cov_11_534349	None	peptide/nickel transport system ATP-binding protein
706	Acetatifactor_sp011959105	Acetatifactor_sp011959105	K02031	23171	NODE_482_length_36746_cov_13_125835	None	peptide/nickel transport system ATP-binding protein
707	Acetatifactor_sp011959105	Acetatifactor_sp011959105	K00756	25787	NODE_185_length_69401_cov_11_534349	None	pyrimidine-nucleoside phosphorylase [EC:2.4.2.2]
708	Acetatifactor_sp011959105	Acetatifactor_sp011959105	K03075	25800	NODE_185_length_69401_cov_11_534349	None	preprotein translocase subunit SecG
709	Acetatifactor_sp011959105	Acetatifactor_sp011959105	K02034	25794	NODE_185_length_69401_cov_11_534349	None	peptide/nickel transport system permease protein
710	Acetatifactor_sp011959105	Acetatifactor_sp011959105	K02034	23170	NODE_482_length_36746_cov_13_125835	None	peptide/nickel transport system permease protein
711	Acetatifactor_sp011959105	Acetatifactor_sp011959105	K03664	25798	NODE_185_length_69401_cov_11_534349	None	SsrA-binding protein
712	Acetatifactor_sp011959105	Acetatifactor_sp011959105	K01258	25772	NODE_185_length_69401_cov_11_534349	None	tripeptide aminopeptidase [EC:3.4.11.4]
713	Acetatifactor_sp011959105	Acetatifactor_sp011959105	K12573	25799	NODE_185_length_69401_cov_11_534349	None	ribonuclease R [EC:3.1.13.1]
714	Acetatifactor_sp011959105	Acetatifactor_sp011959105	K00758	25787	NODE_185_length_69401_cov_11_534349	None	thymidine phosphorylase [EC:2.4.2.4]
715	Acetatifactor_sp011959105	Acetatifactor_sp011959105	K10202	25762	NODE_185_length_69401_cov_11_534349	None	N-acetylglucosamine transport system permease protein
716	Acetatifactor_sp011959105	Acetatifactor_sp011959105	K06306	17977	NODE_30_length_149858_cov_15_556724	None	spore germination protein
717	Acetatifactor_sp011959105	Acetatifactor_sp011959105	K06306	25788	NODE_185_length_69401_cov_11_534349	None	spore germination protein
718	Acetatifactor_sp011959105	Acetatifactor_sp011959105	K07192	25773	NODE_185_length_69401_cov_11_534349	None	flotillin
719	Acetatifactor_sp011959105	Acetatifactor_sp011959105	K10201	25763	NODE_185_length_69401_cov_11_534349	None	N-acetylglucosamine transport system permease protein
720	Acetatifactor_sp011959105	Acetatifactor_sp011959105	K01866	25753	NODE_185_length_69401_cov_11_534349	None	tyrosyl-tRNA synthetase [EC:6.1.1.1]
721	Acetatifactor_sp011959105	Acetatifactor_sp011959105	K01866	26767	NODE_271_length_55077_cov_12_571444	None	tyrosyl-tRNA synthetase [EC:6.1.1.1]
722	Acetatifactor_sp011959105	Acetatifactor_sp011959105	K09989	25756	NODE_185_length_69401_cov_11_534349	None	uncharacterized protein
723	Acetatifactor_sp011959105	Acetatifactor_sp011959105	K10200	25764	NODE_185_length_69401_cov_11_534349	None	N-acetylglucosamine transport system substrate-binding protein
724	Acetatifactor_sp011959105	Acetatifactor_sp011959105	K18954	25765	NODE_185_length_69401_cov_11_534349	None	AraC family transcriptional regulator, transcriptional activator of pobA
725	Acetatifactor_sp011959105	Acetatifactor_sp011959105	K06217	25784	NODE_185_length_69401_cov_11_534349	None	phosphate starvation-inducible protein PhoH and related proteins
726	Acetatifactor_sp011959105	Acetatifactor_sp011959105	K06438	25785	NODE_185_length_69401_cov_11_534349	None	similar to stage IV sporulation protein
727	Acetatifactor_sp011959105	Acetatifactor_sp011959105	K02099	38080	NODE_180_length_70124_cov_13_959511	None	AraC family transcriptional regulator, arabinose operon regulatory protein
728	Acetatifactor_sp011959105	Acetatifactor_sp011959105	K02099	20216	NODE_645_length_28654_cov_14_481835	None	AraC family transcriptional regulator, arabinose operon regulatory protein
729	Acetatifactor_sp011959105	Acetatifactor_sp011959105	K02099	25765	NODE_185_length_69401_cov_11_534349	None	AraC family transcriptional regulator, arabinose operon regulatory protein
730	Acetatifactor_sp011959105	Acetatifactor_sp011959105	K07042	25782	NODE_185_length_69401_cov_11_534349	None	probable rRNA maturation factor
731	Acetatifactor_sp011959105	Acetatifactor_sp011959105	K15533	25760	NODE_185_length_69401_cov_11_534349	None	1,3-beta-galactosyl-N-acetylhexosamine phosphorylase [EC:2.4.1.211]
732	Acetatifactor_sp011959105	Acetatifactor_sp011959105	K07137	25778	NODE_185_length_69401_cov_11_534349	None	uncharacterized protein
733	Acetatifactor_sp011959105	Acetatifactor_sp011959105	K06398	25751	NODE_185_length_69401_cov_11_534349	None	stage IV sporulation protein A
734	Acetatifactor_sp011959105	Acetatifactor_sp011959105	K06381	28522	NODE_130_length_83251_cov_13_260974	None	stage II sporulation protein D
735	Acetatifactor_sp011959105	Acetatifactor_sp011959105	K07738	28543	NODE_130_length_83251_cov_13_260974	None	transcriptional repressor NrdR
736	Acetatifactor_sp011959105	Acetatifactor_sp011959105	K03411	27883	NODE_4673_length_6380_cov_12_947510	None	chemotaxis protein CheD [EC:3.5.1.44]
737	Acetatifactor_sp011959105	Acetatifactor_sp011959105	K07058	28521	NODE_130_length_83251_cov_13_260974	None	membrane protein
738	Acetatifactor_sp011959105	Acetatifactor_sp011959105	K09749	32156	NODE_114_length_91042_cov_14_159297	None	uncharacterized protein
739	Acetatifactor_sp011959105	Acetatifactor_sp011959105	K09749	20068	NODE_13_length_205171_cov_15_453119	None	uncharacterized protein
740	Acetatifactor_sp011959105	Acetatifactor_sp011959105	K09749	27886	NODE_4673_length_6380_cov_12_947510	None	uncharacterized protein
741	Acetatifactor_sp011959105	Acetatifactor_sp011959105	K02967	27890	NODE_4673_length_6380_cov_12_947510	None	small subunit ribosomal protein S2
742	Acetatifactor_sp011959105	Acetatifactor_sp011959105	K00180	28490	NODE_130_length_83251_cov_13_260974	None	indolepyruvate ferredoxin oxidoreductase, beta subunit [EC:1.2.7.8]
743	Acetatifactor_sp011959105	Acetatifactor_sp011959105	K01854	28495	NODE_130_length_83251_cov_13_260974	None	UDP-galactopyranose mutase [EC:5.4.99.9]
744	Acetatifactor_sp011959105	Acetatifactor_sp011959105	K01869	28511	NODE_130_length_83251_cov_13_260974	None	leucyl-tRNA synthetase [EC:6.1.1.4]
745	Acetatifactor_sp011959105	Acetatifactor_sp011959105	K07015	28542	NODE_130_length_83251_cov_13_260974	None	uncharacterized protein
746	Acetatifactor_sp011959105	Acetatifactor_sp011959105	K01262	28525	NODE_130_length_83251_cov_13_260974	None	Xaa-Pro aminopeptidase [EC:3.4.11.9]
747	Acetatifactor_sp011959105	Acetatifactor_sp011959105	K02356	28538	NODE_130_length_83251_cov_13_260974	None	elongation factor P
748	Acetatifactor_sp011959105	Acetatifactor_sp011959105	K00179	28491	NODE_130_length_83251_cov_13_260974	None	indolepyruvate ferredoxin oxidoreductase, alpha subunit [EC:1.2.7.8]
749	Acetatifactor_sp011959105	Acetatifactor_sp011959105	K01890	28518	NODE_130_length_83251_cov_13_260974	None	phenylalanyl-tRNA synthetase beta chain [EC:6.1.1.20]
750	Acetatifactor_sp011959105	Acetatifactor_sp011959105	K03442	28496	NODE_130_length_83251_cov_13_260974	None	small conductance mechanosensitive channel
751	Acetatifactor_sp011959105	Acetatifactor_sp011959105	K01889	28519	NODE_130_length_83251_cov_13_260974	None	phenylalanyl-tRNA synthetase alpha chain [EC:6.1.1.20]
752	Acetatifactor_sp011959105	Acetatifactor_sp011959105	K07568	28516	NODE_130_length_83251_cov_13_260974	None	S-adenosylmethionine:tRNA ribosyltransferase-isomerase [EC:2.4.99.17]
753	Acetatifactor_sp011959105	Acetatifactor_sp011959105	K02405	27885	NODE_4673_length_6380_cov_12_947510	None	RNA polymerase sigma factor FliA
754	Acetatifactor_sp011959105	Acetatifactor_sp011959105	K00262	28534	NODE_130_length_83251_cov_13_260974	None	glutamate dehydrogenase (NADP+) [EC:1.4.1.4]
755	Acetatifactor_sp011959105	Acetatifactor_sp011959105	K01619	28526	NODE_130_length_83251_cov_13_260974	None	deoxyribose-phosphate aldolase [EC:4.1.2.4]
756	Acetatifactor_sp011959105	Acetatifactor_sp011959105	K02357	5309	NODE_1317_length_16298_cov_13_782614	None	elongation factor Ts
757	Acetatifactor_sp011959105	Acetatifactor_sp011959105	K06967	15621	NODE_164_length_73312_cov_12_071474	None	tRNA (adenine22-N1)-methyltransferase [EC:2.1.1.217]
758	Acetatifactor_sp011959105	Acetatifactor_sp011959105	K01207	15663	NODE_932_length_21785_cov_13_203451	None	beta-N-acetylhexosaminidase [EC:3.2.1.52]
759	Acetatifactor_sp011959105	Acetatifactor_sp011959105	K14731	15625	NODE_164_length_73312_cov_12_071474	None	epsilon-lactone hydrolase [EC:3.1.1.83]
760	Acetatifactor_sp011959105	Acetatifactor_sp011959105	K03310	15658	NODE_932_length_21785_cov_13_203451	None	alanine or glycine:cation symporter, AGCS family
761	Acetatifactor_sp011959105	Acetatifactor_sp011959105	K01129	15624	NODE_164_length_73312_cov_12_071474	None	dGTPase [EC:3.1.5.1]
762	Acetatifactor_sp011959105	Acetatifactor_sp011959105	K01129	20186	NODE_13_length_205171_cov_15_453119	None	dGTPase [EC:3.1.5.1]
763	Acetatifactor_sp011959105	Acetatifactor_sp011959105	K02342	15641	NODE_164_length_73312_cov_12_071474	None	DNA polymerase III subunit epsilon [EC:2.7.7.7]
764	Acetatifactor_sp011959105	Acetatifactor_sp011959105	K02342	33283	NODE_240_length_59686_cov_12_128574	None	DNA polymerase III subunit epsilon [EC:2.7.7.7]
765	Acetatifactor_sp011959105	Acetatifactor_sp011959105	K07238	15607	NODE_164_length_73312_cov_12_071474	None	zinc transporter, ZIP family
766	Acetatifactor_sp011959105	Acetatifactor_sp011959105	K22278	20185	NODE_13_length_205171_cov_15_453119	None	peptidoglycan-N-acetylglucosamine deacetylase [EC:3.5.1.104]
767	Acetatifactor_sp011959105	Acetatifactor_sp011959105	K22278	116	NODE_298_length_51759_cov_14_301466	None	peptidoglycan-N-acetylglucosamine deacetylase [EC:3.5.1.104]
768	Acetatifactor_sp011959105	Acetatifactor_sp011959105	K22278	15583	NODE_164_length_73312_cov_12_071474	None	peptidoglycan-N-acetylglucosamine deacetylase [EC:3.5.1.104]
769	Acetatifactor_sp011959105	Acetatifactor_sp011959105	K05350	15587	NODE_164_length_73312_cov_12_071474	None	beta-glucosidase [EC:3.2.1.21]
770	Acetatifactor_sp011959105	Acetatifactor_sp011959105	K03086	15622	NODE_164_length_73312_cov_12_071474	None	RNA polymerase primary sigma factor
771	Acetatifactor_sp011959105	Acetatifactor_sp011959105	K00571	15650	NODE_164_length_73312_cov_12_071474	None	site-specific DNA-methyltransferase (adenine-specific) [EC:2.1.1.72]
772	Acetatifactor_sp011959105	Acetatifactor_sp011959105	K06884	15648	NODE_164_length_73312_cov_12_071474	None	uncharacterized protein
773	Acetatifactor_sp011959105	Acetatifactor_sp011959105	K16212	15590	NODE_164_length_73312_cov_12_071474	None	4-O-beta-D-mannosyl-D-glucose phosphorylase [EC:2.4.1.281]
774	Acetatifactor_sp011959105	Acetatifactor_sp011959105	K08986	15617	NODE_164_length_73312_cov_12_071474	None	putative membrane protein
775	Acetatifactor_sp011959105	Acetatifactor_sp011959105	K16213	15591	NODE_164_length_73312_cov_12_071474	None	cellobiose epimerase [EC:5.1.3.11]
776	Acetatifactor_sp011959105	Acetatifactor_sp011959105	K08600	32165	NODE_114_length_91042_cov_14_159297	None	sortase B [EC:3.4.22.71]
777	Acetatifactor_sp011959105	Acetatifactor_sp011959105	K08600	15595	NODE_164_length_73312_cov_12_071474	None	sortase B [EC:3.4.22.71]
778	Acetatifactor_sp011959105	Acetatifactor_sp011959105	K08600	34187	NODE_368_length_45170_cov_13_660911	None	sortase B [EC:3.4.22.71]
779	Acetatifactor_sp011959105	Acetatifactor_sp011959105	K08600	10804	NODE_38_length_136065_cov_13_341416	None	sortase B [EC:3.4.22.71]
780	Acetatifactor_sp011959105	Acetatifactor_sp011959105	K08600	20181	NODE_13_length_205171_cov_15_453119	None	sortase B [EC:3.4.22.71]
781	Acetatifactor_sp011959105	Acetatifactor_sp011959105	K08600	34902	NODE_121_length_86585_cov_16_929389	None	sortase B [EC:3.4.22.71]
782	Acetatifactor_sp011959105	Acetatifactor_sp011959105	K01740	38092	NODE_180_length_70124_cov_13_959511	None	O-acetylhomoserine (thiol)-lyase [EC:2.5.1.49]
783	Acetatifactor_sp011959105	Acetatifactor_sp011959105	K01740	15661	NODE_932_length_21785_cov_13_203451	None	O-acetylhomoserine (thiol)-lyase [EC:2.5.1.49]
784	Acetatifactor_sp011959105	Acetatifactor_sp011959105	K02315	15649	NODE_164_length_73312_cov_12_071474	None	DNA replication protein DnaC
785	Acetatifactor_sp011959105	Acetatifactor_sp011959105	K02315	18006	NODE_30_length_149858_cov_15_556724	None	DNA replication protein DnaC
786	Acetatifactor_sp011959105	Acetatifactor_sp011959105	K06400	15630	NODE_164_length_73312_cov_12_071474	None	site-specific DNA recombinase
787	Acetatifactor_sp011959105	Acetatifactor_sp011959105	K06400	38135	NODE_180_length_70124_cov_13_959511	None	site-specific DNA recombinase
788	Acetatifactor_sp011959105	Acetatifactor_sp011959105	K06400	38136	NODE_180_length_70124_cov_13_959511	None	site-specific DNA recombinase
789	Acetatifactor_sp011959105	Acetatifactor_sp011959105	K06400	38137	NODE_180_length_70124_cov_13_959511	None	site-specific DNA recombinase
790	Acetatifactor_sp011959105	Acetatifactor_sp011959105	K06400	7258	NODE_207_length_65192_cov_17_114190	None	site-specific DNA recombinase
791	Acetatifactor_sp011959105	Acetatifactor_sp011959105	K02316	15623	NODE_164_length_73312_cov_12_071474	None	DNA primase [EC:2.7.7.101]
792	Acetatifactor_sp011959105	Acetatifactor_sp011959105	K02911	39966	NODE_235_length_60330_cov_12_494185	None	large subunit ribosomal protein L32
793	Acetatifactor_sp011959105	Acetatifactor_sp011959105	K06960	39955	NODE_235_length_60330_cov_12_494185	None	uncharacterized protein
794	Acetatifactor_sp011959105	Acetatifactor_sp011959105	K00057	39937	NODE_235_length_60330_cov_12_494185	None	glycerol-3-phosphate dehydrogenase (NAD(P)+) [EC:1.1.1.94]
795	Acetatifactor_sp011959105	Acetatifactor_sp011959105	K02052	39971	NODE_235_length_60330_cov_12_494185	None	putative spermidine/putrescine transport system ATP-binding protein
796	Acetatifactor_sp011959105	Acetatifactor_sp011959105	K08591	39938	NODE_235_length_60330_cov_12_494185	None	acyl phosphate:glycerol-3-phosphate acyltransferase [EC:2.3.1.275]
797	Acetatifactor_sp011959105	Acetatifactor_sp011959105	K08591	71	NODE_61_length_118937_cov_14_458236	None	acyl phosphate:glycerol-3-phosphate acyltransferase [EC:2.3.1.275]
798	Acetatifactor_sp011959105	Acetatifactor_sp011959105	K02860	39954	NODE_235_length_60330_cov_12_494185	None	16S rRNA processing protein RimM
799	Acetatifactor_sp011959105	Acetatifactor_sp011959105	K14540	39950	NODE_235_length_60330_cov_12_494185	None	ribosome biogenesis GTPase A
800	Acetatifactor_sp011959105	Acetatifactor_sp011959105	K07460	39945	NODE_235_length_60330_cov_12_494185	None	putative endonuclease
801	Acetatifactor_sp011959105	Acetatifactor_sp011959105	K19002	39932	NODE_235_length_60330_cov_12_494185	None	1,2-diacylglycerol 3-alpha-glucosyltransferase [EC:2.4.1.337]
802	Acetatifactor_sp011959105	Acetatifactor_sp011959105	K11072	39971	NODE_235_length_60330_cov_12_494185	None	spermidine/putrescine transport system ATP-binding protein [EC:7.6.2.11]
803	Acetatifactor_sp011959105	Acetatifactor_sp011959105	K03106	39957	NODE_235_length_60330_cov_12_494185	None	signal recognition particle subunit SRP54 [EC:3.6.5.4]
804	Acetatifactor_sp011959105	Acetatifactor_sp011959105	K03110	39961	NODE_235_length_60330_cov_12_494185	None	fused signal recognition particle receptor
805	Acetatifactor_sp011959105	Acetatifactor_sp011959105	K02959	39956	NODE_235_length_60330_cov_12_494185	None	small subunit ribosomal protein S16
806	Acetatifactor_sp011959105	Acetatifactor_sp011959105	K03529	39962	NODE_235_length_60330_cov_12_494185	None	chromosome segregation protein
807	Acetatifactor_sp011959105	Acetatifactor_sp011959105	K00554	39953	NODE_235_length_60330_cov_12_494185	None	tRNA (guanine37-N1)-methyltransferase [EC:2.1.1.228]
808	Acetatifactor_sp011959105	Acetatifactor_sp011959105	K03470	39948	NODE_235_length_60330_cov_12_494185	None	ribonuclease HII [EC:3.1.26.4]
809	Acetatifactor_sp011959105	Acetatifactor_sp011959105	K03100	39949	NODE_235_length_60330_cov_12_494185	None	signal peptidase I [EC:3.4.21.89]
810	Acetatifactor_sp011959105	Acetatifactor_sp011959105	K03100	39951	NODE_235_length_60330_cov_12_494185	None	signal peptidase I [EC:3.4.21.89]
811	Acetatifactor_sp011959105	Acetatifactor_sp011959105	K05810	39944	NODE_235_length_60330_cov_12_494185	None	polyphenol oxidase [EC:1.10.3.-]
812	Acetatifactor_sp011959105	Acetatifactor_sp011959105	K03685	39963	NODE_235_length_60330_cov_12_494185	None	ribonuclease III [EC:3.1.26.3]
813	Acetatifactor_sp011959105	Acetatifactor_sp011959105	K04061	39946	NODE_235_length_60330_cov_12_494185	None	flagellar biosynthesis protein
814	Acetatifactor_sp011959105	Acetatifactor_sp011959105	K10822	1209	NODE_35_length_142391_cov_15_490389	None	nonpolar-amino-acid-transporting ATPase [EC:7.4.2.2]
815	Acetatifactor_sp011959105	Acetatifactor_sp011959105	K10822	12034	NODE_905_length_22491_cov_12_879881	None	nonpolar-amino-acid-transporting ATPase [EC:7.4.2.2]
816	Acetatifactor_sp011959105	Acetatifactor_sp011959105	K10822	39971	NODE_235_length_60330_cov_12_494185	None	nonpolar-amino-acid-transporting ATPase [EC:7.4.2.2]
817	Acetatifactor_sp011959105	Acetatifactor_sp011959105	K10822	1166	NODE_35_length_142391_cov_15_490389	None	nonpolar-amino-acid-transporting ATPase [EC:7.4.2.2]
818	Acetatifactor_sp011959105	Acetatifactor_sp011959105	K09787	39958	NODE_235_length_60330_cov_12_494185	None	uncharacterized protein
819	Acetatifactor_sp011959105	Acetatifactor_sp011959105	K07040	39967	NODE_235_length_60330_cov_12_494185	None	uncharacterized protein
820	Acetatifactor_sp011959105	Acetatifactor_sp011959105	K02884	39952	NODE_235_length_60330_cov_12_494185	None	large subunit ribosomal protein L19
821	Acetatifactor_sp011959105	Acetatifactor_sp011959105	K03621	39965	NODE_235_length_60330_cov_12_494185	None	phosphate acyltransferase [EC:2.3.1.274]
822	Acetatifactor_sp011959105	Acetatifactor_sp011959105	K03977	39939	NODE_235_length_60330_cov_12_494185	None	GTPase
823	Acetatifactor_sp011959105	Acetatifactor_sp011959105	K03975	39933	NODE_235_length_60330_cov_12_494185	None	membrane-associated protein
824	Acetatifactor_sp011959105	Acetatifactor_sp011959105	K01990	34880	NODE_121_length_86585_cov_16_929389	None	ABC-2 type transport system ATP-binding protein
825	Acetatifactor_sp011959105	Acetatifactor_sp011959105	K01990	12034	NODE_905_length_22491_cov_12_879881	None	ABC-2 type transport system ATP-binding protein
826	Acetatifactor_sp011959105	Acetatifactor_sp011959105	K01990	20196	NODE_13_length_205171_cov_15_453119	None	ABC-2 type transport system ATP-binding protein
827	Acetatifactor_sp011959105	Acetatifactor_sp011959105	K01990	20132	NODE_13_length_205171_cov_15_453119	None	ABC-2 type transport system ATP-binding protein
828	Acetatifactor_sp011959105	Acetatifactor_sp011959105	K01990	36295	NODE_213_length_64308_cov_13_756245	None	ABC-2 type transport system ATP-binding protein
829	Acetatifactor_sp011959105	Acetatifactor_sp011959105	K01990	36299	NODE_213_length_64308_cov_13_756245	None	ABC-2 type transport system ATP-binding protein
830	Acetatifactor_sp011959105	Acetatifactor_sp011959105	K01990	23181	NODE_482_length_36746_cov_13_125835	None	ABC-2 type transport system ATP-binding protein
831	Acetatifactor_sp011959105	Acetatifactor_sp011959105	K01990	20176	NODE_13_length_205171_cov_15_453119	None	ABC-2 type transport system ATP-binding protein
832	Acetatifactor_sp011959105	Acetatifactor_sp011959105	K01990	1170	NODE_35_length_142391_cov_15_490389	None	ABC-2 type transport system ATP-binding protein
833	Acetatifactor_sp011959105	Acetatifactor_sp011959105	K01990	32181	NODE_114_length_91042_cov_14_159297	None	ABC-2 type transport system ATP-binding protein
834	Acetatifactor_sp011959105	Acetatifactor_sp011959105	K01990	10743	NODE_38_length_136065_cov_13_341416	None	ABC-2 type transport system ATP-binding protein
835	Acetatifactor_sp011959105	Acetatifactor_sp011959105	K01990	36346	NODE_213_length_64308_cov_13_756245	None	ABC-2 type transport system ATP-binding protein
836	Acetatifactor_sp011959105	Acetatifactor_sp011959105	K01990	4446	NODE_3762_length_7410_cov_17_833855	None	ABC-2 type transport system ATP-binding protein
837	Acetatifactor_sp011959105	Acetatifactor_sp011959105	K03499	18076	NODE_30_length_149858_cov_15_556724	None	trk system potassium uptake protein
838	Acetatifactor_sp011959105	Acetatifactor_sp011959105	K03499	4444	NODE_7084_length_4704_cov_15_373844	None	trk system potassium uptake protein
839	Acetatifactor_sp011959105	Acetatifactor_sp011959105	K12410	4445	NODE_7084_length_4704_cov_15_373844	None	NAD-dependent deacetylase [EC:2.3.1.286]
840	Acetatifactor_sp011959105	Acetatifactor_sp011959105	K07126	6314	NODE_157_length_74937_cov_20_326313	None	uncharacterized protein
841	Acetatifactor_sp011959105	Acetatifactor_sp011959105	K07126	7289	NODE_207_length_65192_cov_17_114190	None	uncharacterized protein
842	Acetatifactor_sp011959105	Acetatifactor_sp011959105	K07126	4450	NODE_3762_length_7410_cov_17_833855	None	uncharacterized protein
843	Acetatifactor_sp011959105	Acetatifactor_sp011959105	K06382	34939	NODE_121_length_86585_cov_16_929389	None	stage II sporulation protein E [EC:3.1.3.16]
844	Acetatifactor_sp011959105	Acetatifactor_sp011959105	K01992	12035	NODE_905_length_22491_cov_12_879881	None	ABC-2 type transport system permease protein
845	Acetatifactor_sp011959105	Acetatifactor_sp011959105	K01992	34917	NODE_121_length_86585_cov_16_929389	None	ABC-2 type transport system permease protein
846	Acetatifactor_sp011959105	Acetatifactor_sp011959105	K01992	21705	NODE_204_length_65612_cov_16_144515	None	ABC-2 type transport system permease protein
847	Acetatifactor_sp011959105	Acetatifactor_sp011959105	K01992	21706	NODE_204_length_65612_cov_16_144515	None	ABC-2 type transport system permease protein
848	Acetatifactor_sp011959105	Acetatifactor_sp011959105	K01992	13431	NODE_41_length_132337_cov_18_822122	None	ABC-2 type transport system permease protein
849	Acetatifactor_sp011959105	Acetatifactor_sp011959105	K01992	36345	NODE_213_length_64308_cov_13_756245	None	ABC-2 type transport system permease protein
850	Acetatifactor_sp011959105	Acetatifactor_sp011959105	K03798	16882	NODE_252_length_57645_cov_14_428165	None	cell division protease FtsH [EC:3.4.24.-]
851	Acetatifactor_sp011959105	Acetatifactor_sp011959105	K03798	34942	NODE_121_length_86585_cov_16_929389	None	cell division protease FtsH [EC:3.4.24.-]
852	Acetatifactor_sp011959105	Acetatifactor_sp011959105	K03564	34884	NODE_121_length_86585_cov_16_929389	None	thioredoxin-dependent peroxiredoxin [EC:1.11.1.24]
853	Acetatifactor_sp011959105	Acetatifactor_sp011959105	K03701	34890	NODE_121_length_86585_cov_16_929389	None	excinuclease ABC subunit A
854	Acetatifactor_sp011959105	Acetatifactor_sp011959105	K03701	14397	NODE_15_length_192602_cov_15_584621	None	excinuclease ABC subunit A
855	Acetatifactor_sp011959105	Acetatifactor_sp011959105	K00974	34929	NODE_121_length_86585_cov_16_929389	None	tRNA nucleotidyltransferase (CCA-adding enzyme) [EC:2.7.7.72 3.1.3.- 3.1.4.-]
856	Acetatifactor_sp011959105	Acetatifactor_sp011959105	K07979	34881	NODE_121_length_86585_cov_16_929389	None	GntR family transcriptional regulator
857	Acetatifactor_sp011959105	Acetatifactor_sp011959105	K07979	20043	NODE_13_length_205171_cov_15_453119	None	GntR family transcriptional regulator
858	Acetatifactor_sp011959105	Acetatifactor_sp011959105	K07979	139	NODE_298_length_51759_cov_14_301466	None	GntR family transcriptional regulator
859	Acetatifactor_sp011959105	Acetatifactor_sp011959105	K07979	13421	NODE_41_length_132337_cov_18_822122	None	GntR family transcriptional regulator
860	Acetatifactor_sp011959105	Acetatifactor_sp011959105	K07979	16912	NODE_1051_length_19798_cov_13_901281	None	GntR family transcriptional regulator
861	Acetatifactor_sp011959105	Acetatifactor_sp011959105	K07979	36347	NODE_213_length_64308_cov_13_756245	None	GntR family transcriptional regulator
862	Acetatifactor_sp011959105	Acetatifactor_sp011959105	K00970	34929	NODE_121_length_86585_cov_16_929389	None	poly(A) polymerase [EC:2.7.7.19]
863	Acetatifactor_sp011959105	Acetatifactor_sp011959105	K05970	34904	NODE_121_length_86585_cov_16_929389	None	sialate O-acetylesterase [EC:3.1.1.53]
864	Acetatifactor_sp011959105	Acetatifactor_sp011959105	K03530	34932	NODE_121_length_86585_cov_16_929389	None	DNA-binding protein HU-beta
865	Acetatifactor_sp011959105	Acetatifactor_sp011959105	K04075	34940	NODE_121_length_86585_cov_16_929389	None	tRNA(Ile)-lysidine synthase [EC:6.3.4.19]
866	Acetatifactor_sp011959105	Acetatifactor_sp011959105	K00760	34941	NODE_121_length_86585_cov_16_929389	None	hypoxanthine phosphoribosyltransferase [EC:2.4.2.8]
867	Acetatifactor_sp011959105	Acetatifactor_sp011959105	K04762	34933	NODE_121_length_86585_cov_16_929389	None	ribosome-associated heat shock protein Hsp15
868	Acetatifactor_sp011959105	Acetatifactor_sp011959105	K01811	20204	NODE_645_length_28654_cov_14_481835	None	alpha-D-xyloside xylohydrolase [EC:3.2.1.177]
869	Acetatifactor_sp011959105	Acetatifactor_sp011959105	K01811	34924	NODE_121_length_86585_cov_16_929389	None	alpha-D-xyloside xylohydrolase [EC:3.2.1.177]
870	Acetatifactor_sp011959105	Acetatifactor_sp011959105	K01811	14464	NODE_15_length_192602_cov_15_584621	None	alpha-D-xyloside xylohydrolase [EC:3.2.1.177]
871	Acetatifactor_sp011959105	Acetatifactor_sp011959105	K09861	34885	NODE_121_length_86585_cov_16_929389	None	uncharacterized protein
872	Acetatifactor_sp011959105	Acetatifactor_sp011959105	K23508	34906	NODE_121_length_86585_cov_16_929389	None	galactofuranose transport system substrate-binding protein
873	Acetatifactor_sp011959105	Acetatifactor_sp011959105	K23508	1165	NODE_35_length_142391_cov_15_490389	None	galactofuranose transport system substrate-binding protein
874	Acetatifactor_sp011959105	Acetatifactor_sp011959105	K23508	1162	NODE_35_length_142391_cov_15_490389	None	galactofuranose transport system substrate-binding protein
875	Acetatifactor_sp011959105	Acetatifactor_sp011959105	K07301	38123	NODE_180_length_70124_cov_13_959511	None	cation:H+ antiporter
876	Acetatifactor_sp011959105	Acetatifactor_sp011959105	K07301	1198	NODE_35_length_142391_cov_15_490389	None	cation:H+ antiporter
877	Acetatifactor_sp011959105	Acetatifactor_sp011959105	K07076	38115	NODE_180_length_70124_cov_13_959511	None	uncharacterized protein
878	Acetatifactor_sp011959105	Acetatifactor_sp011959105	K01206	38121	NODE_180_length_70124_cov_13_959511	None	alpha-L-fucosidase [EC:3.2.1.51]
879	Acetatifactor_sp011959105	Acetatifactor_sp011959105	K06877	38093	NODE_180_length_70124_cov_13_959511	None	DEAD/DEAH box helicase domain-containing protein
880	Acetatifactor_sp011959105	Acetatifactor_sp011959105	K04078	38083	NODE_180_length_70124_cov_13_959511	None	chaperonin GroES
881	Acetatifactor_sp011959105	Acetatifactor_sp011959105	K05366	38077	NODE_180_length_70124_cov_13_959511	None	penicillin-binding protein 1A [EC:2.4.1.129 3.4.16.4]
882	Acetatifactor_sp011959105	Acetatifactor_sp011959105	K01267	38129	NODE_180_length_70124_cov_13_959511	None	aspartyl aminopeptidase [EC:3.4.11.21]
883	Acetatifactor_sp011959105	Acetatifactor_sp011959105	K02428	38107	NODE_180_length_70124_cov_13_959511	None	XTP/dITP diphosphohydrolase [EC:3.6.1.66]
884	Acetatifactor_sp011959105	Acetatifactor_sp011959105	K06924	38089	NODE_180_length_70124_cov_13_959511	None	uncharacterized protein
885	Acetatifactor_sp011959105	Acetatifactor_sp011959105	K06926	38086	NODE_180_length_70124_cov_13_959511	None	uncharacterized protein
886	Acetatifactor_sp011959105	Acetatifactor_sp011959105	K04077	38084	NODE_180_length_70124_cov_13_959511	None	chaperonin GroEL
887	Acetatifactor_sp011959105	Acetatifactor_sp011959105	K03152	38128	NODE_180_length_70124_cov_13_959511	None	protein deglycase [EC:3.5.1.124]
888	Acetatifactor_sp011959105	Acetatifactor_sp011959105	K07095	38108	NODE_180_length_70124_cov_13_959511	None	uncharacterized protein
889	Acetatifactor_sp011959105	Acetatifactor_sp011959105	K00702	38098	NODE_180_length_70124_cov_13_959511	None	cellobiose phosphorylase [EC:2.4.1.20]
890	Acetatifactor_sp011959105	Acetatifactor_sp011959105	K06213	38079	NODE_180_length_70124_cov_13_959511	None	magnesium transporter
891	Acetatifactor_sp011959105	Acetatifactor_sp011959105	K18815	6271	NODE_157_length_74937_cov_20_326313	None	aminoglycoside 6'-N-acetyltransferase I [EC:2.3.1.82]
892	Acetatifactor_sp011959105	Acetatifactor_sp011959105	K21472	6199	NODE_167_length_73020_cov_15_007798	None	peptidoglycan LD-endopeptidase LytH [EC:3.4.-.-]
893	Acetatifactor_sp011959105	Acetatifactor_sp011959105	K06147	18080	NODE_30_length_149858_cov_15_556724	None	ATP-binding cassette, subfamily B, bacterial
894	Acetatifactor_sp011959105	Acetatifactor_sp011959105	K06147	24129	NODE_220_length_62708_cov_13_080475	None	ATP-binding cassette, subfamily B, bacterial
895	Acetatifactor_sp011959105	Acetatifactor_sp011959105	K06147	24130	NODE_220_length_62708_cov_13_080475	None	ATP-binding cassette, subfamily B, bacterial
896	Acetatifactor_sp011959105	Acetatifactor_sp011959105	K06147	18081	NODE_30_length_149858_cov_15_556724	None	ATP-binding cassette, subfamily B, bacterial
897	Acetatifactor_sp011959105	Acetatifactor_sp011959105	K06147	20070	NODE_13_length_205171_cov_15_453119	None	ATP-binding cassette, subfamily B, bacterial
898	Acetatifactor_sp011959105	Acetatifactor_sp011959105	K06147	34216	NODE_368_length_45170_cov_13_660911	None	ATP-binding cassette, subfamily B, bacterial
899	Acetatifactor_sp011959105	Acetatifactor_sp011959105	K06147	34217	NODE_368_length_45170_cov_13_660911	None	ATP-binding cassette, subfamily B, bacterial
900	Acetatifactor_sp011959105	Acetatifactor_sp011959105	K06147	6291	NODE_157_length_74937_cov_20_326313	None	ATP-binding cassette, subfamily B, bacterial
901	Acetatifactor_sp011959105	Acetatifactor_sp011959105	K06147	6293	NODE_157_length_74937_cov_20_326313	None	ATP-binding cassette, subfamily B, bacterial
902	Acetatifactor_sp011959105	Acetatifactor_sp011959105	K06147	7286	NODE_207_length_65192_cov_17_114190	None	ATP-binding cassette, subfamily B, bacterial
903	Acetatifactor_sp011959105	Acetatifactor_sp011959105	K06147	6263	NODE_157_length_74937_cov_20_326313	None	ATP-binding cassette, subfamily B, bacterial
904	Acetatifactor_sp011959105	Acetatifactor_sp011959105	K03413	6241	NODE_167_length_73020_cov_15_007798	None	two-component system, chemotaxis family, chemotaxis protein CheY
905	Acetatifactor_sp011959105	Acetatifactor_sp011959105	K03413	18039	NODE_30_length_149858_cov_15_556724	None	two-component system, chemotaxis family, chemotaxis protein CheY
906	Acetatifactor_sp011959105	Acetatifactor_sp011959105	K03413	37198	NODE_181_length_70068_cov_11_923186	None	two-component system, chemotaxis family, chemotaxis protein CheY
907	Acetatifactor_sp011959105	Acetatifactor_sp011959105	K03413	10711	NODE_38_length_136065_cov_13_341416	None	two-component system, chemotaxis family, chemotaxis protein CheY
908	Acetatifactor_sp011959105	Acetatifactor_sp011959105	K21471	18074	NODE_30_length_149858_cov_15_556724	None	peptidoglycan DL-endopeptidase CwlO [EC:3.4.-.-]
909	Acetatifactor_sp011959105	Acetatifactor_sp011959105	K21471	6197	NODE_167_length_73020_cov_15_007798	None	peptidoglycan DL-endopeptidase CwlO [EC:3.4.-.-]
910	Acetatifactor_sp011959105	Acetatifactor_sp011959105	K21471	14501	NODE_827_length_23923_cov_13_399698	None	peptidoglycan DL-endopeptidase CwlO [EC:3.4.-.-]
911	Acetatifactor_sp011959105	Acetatifactor_sp011959105	K07138	6275	NODE_157_length_74937_cov_20_326313	None	uncharacterized protein
912	Acetatifactor_sp011959105	Acetatifactor_sp011959105	K09748	6253	NODE_157_length_74937_cov_20_326313	None	ribosome maturation factor RimP
913	Acetatifactor_sp011959105	Acetatifactor_sp011959105	K01892	6300	NODE_157_length_74937_cov_20_326313	None	histidyl-tRNA synthetase [EC:6.1.1.21]
914	Acetatifactor_sp011959105	Acetatifactor_sp011959105	K05808	6198	NODE_167_length_73020_cov_15_007798	None	putative sigma-54 modulation protein
915	Acetatifactor_sp011959105	Acetatifactor_sp011959105	K00384	6196	NODE_167_length_73020_cov_15_007798	None	thioredoxin reductase (NADPH) [EC:1.8.1.9]
916	Acetatifactor_sp011959105	Acetatifactor_sp011959105	K01715	6207	NODE_167_length_73020_cov_15_007798	None	enoyl-CoA hydratase [EC:4.2.1.17]
917	Acetatifactor_sp011959105	Acetatifactor_sp011959105	K06133	6296	NODE_157_length_74937_cov_20_326313	None	4'-phosphopantetheinyl transferase [EC:2.7.8.-]
918	Acetatifactor_sp011959105	Acetatifactor_sp011959105	K02614	6284	NODE_157_length_74937_cov_20_326313	None	acyl-CoA thioesterase [EC:3.1.2.-]
919	Acetatifactor_sp011959105	Acetatifactor_sp011959105	K02600	6252	NODE_157_length_74937_cov_20_326313	None	transcription termination/antitermination protein NusA
920	Acetatifactor_sp011959105	Acetatifactor_sp011959105	K03522	6211	NODE_167_length_73020_cov_15_007798	None	electron transfer flavoprotein alpha subunit
921	Acetatifactor_sp011959105	Acetatifactor_sp011959105	K01876	6299	NODE_157_length_74937_cov_20_326313	None	aspartyl-tRNA synthetase [EC:6.1.1.12]
922	Acetatifactor_sp011959105	Acetatifactor_sp011959105	K02005	6237	NODE_167_length_73020_cov_15_007798	None	HlyD family secretion protein
923	Acetatifactor_sp011959105	Acetatifactor_sp011959105	K02005	6238	NODE_167_length_73020_cov_15_007798	None	HlyD family secretion protein
924	Acetatifactor_sp011959105	Acetatifactor_sp011959105	K03521	6210	NODE_167_length_73020_cov_15_007798	None	electron transfer flavoprotein beta subunit
925	Acetatifactor_sp011959105	Acetatifactor_sp011959105	K06897	6283	NODE_157_length_74937_cov_20_326313	None	7,8-dihydropterin-6-yl-methyl-4-(beta-D-ribofuranosyl)aminobenzene 5'-phosphate synthase [EC:2.5.1.105]
926	Acetatifactor_sp011959105	Acetatifactor_sp011959105	K07742	6251	NODE_157_length_74937_cov_20_326313	None	uncharacterized protein
927	Acetatifactor_sp011959105	Acetatifactor_sp011959105	K02377	6255	NODE_157_length_74937_cov_20_326313	None	GDP-L-fucose synthase [EC:1.1.1.271]
928	Acetatifactor_sp011959105	Acetatifactor_sp011959105	K14059	7249	NODE_637_length_28929_cov_14_935721	None	integrase
929	Acetatifactor_sp011959105	Acetatifactor_sp011959105	K14059	6302	NODE_157_length_74937_cov_20_326313	None	integrase
930	Acetatifactor_sp011959105	Acetatifactor_sp011959105	K21745	6276	NODE_157_length_74937_cov_20_326313	None	MerR family transcriptional regulator, aldehyde-responsive regulator
931	Acetatifactor_sp011959105	Acetatifactor_sp011959105	K13020	6217	NODE_167_length_73020_cov_15_007798	None	UDP-N-acetyl-2-amino-2-deoxyglucuronate dehydrogenase [EC:1.1.1.335]
932	Acetatifactor_sp011959105	Acetatifactor_sp011959105	K13020	32130	NODE_114_length_91042_cov_14_159297	None	UDP-N-acetyl-2-amino-2-deoxyglucuronate dehydrogenase [EC:1.1.1.335]
933	Acetatifactor_sp011959105	Acetatifactor_sp011959105	K13020	32131	NODE_114_length_91042_cov_14_159297	None	UDP-N-acetyl-2-amino-2-deoxyglucuronate dehydrogenase [EC:1.1.1.335]
934	Acetatifactor_sp011959105	Acetatifactor_sp011959105	K01424	6203	NODE_167_length_73020_cov_15_007798	None	L-asparaginase [EC:3.5.1.1]
935	Acetatifactor_sp011959105	Acetatifactor_sp011959105	K19082	6262	NODE_157_length_74937_cov_20_326313	None	two-component system, OmpR family, response regulator protein BraR/BceR
936	Acetatifactor_sp011959105	Acetatifactor_sp011959105	K14982	6234	NODE_167_length_73020_cov_15_007798	None	two-component system, OmpR family, sensor histidine kinase CiaH [EC:2.7.13.3]
937	Acetatifactor_sp011959105	Acetatifactor_sp011959105	K14982	149	NODE_298_length_51759_cov_14_301466	None	two-component system, OmpR family, sensor histidine kinase CiaH [EC:2.7.13.3]
938	Acetatifactor_sp011959105	Acetatifactor_sp011959105	K07478	23155	NODE_482_length_36746_cov_13_125835	None	putative ATPase
939	Acetatifactor_sp011959105	Acetatifactor_sp011959105	K07478	6204	NODE_167_length_73020_cov_15_007798	None	putative ATPase
940	Acetatifactor_sp011959105	Acetatifactor_sp011959105	K08978	6298	NODE_157_length_74937_cov_20_326313	None	bacterial/archaeal transporter family protein
941	Acetatifactor_sp011959105	Acetatifactor_sp011959105	K07487	6288	NODE_157_length_74937_cov_20_326313	None	transposase
942	Acetatifactor_sp011959105	Acetatifactor_sp011959105	K07487	10824	NODE_38_length_136065_cov_13_341416	None	transposase
943	Acetatifactor_sp011959105	Acetatifactor_sp011959105	K19081	6261	NODE_157_length_74937_cov_20_326313	None	two-component system, OmpR family, sensor histidine kinase BraS/BceS [EC:2.7.13.3]
944	Acetatifactor_sp011959105	Acetatifactor_sp011959105	K07240	6269	NODE_157_length_74937_cov_20_326313	None	chromate transporter
945	Acetatifactor_sp011959105	Acetatifactor_sp011959105	K07240	6270	NODE_157_length_74937_cov_20_326313	None	chromate transporter
946	Acetatifactor_sp011959105	Acetatifactor_sp011959105	K06952	6280	NODE_157_length_74937_cov_20_326313	None	uncharacterized protein
947	Acetatifactor_sp011959105	Acetatifactor_sp011959105	K07090	6277	NODE_157_length_74937_cov_20_326313	None	uncharacterized protein
948	Acetatifactor_sp011959105	Acetatifactor_sp011959105	K06950	6264	NODE_157_length_74937_cov_20_326313	None	uncharacterized protein
949	Acetatifactor_sp011959105	Acetatifactor_sp011959105	K06950	8261	NODE_320_length_49611_cov_17_172270	None	uncharacterized protein
950	Acetatifactor_sp011959105	Acetatifactor_sp011959105	K06950	14487	NODE_15_length_192602_cov_15_584621	None	uncharacterized protein
951	Acetatifactor_sp011959105	Acetatifactor_sp011959105	K00684	35481	NODE_493_length_36152_cov_12_277004	None	leucyl/phenylalanyl-tRNA---protein transferase [EC:2.3.2.6]
952	Acetatifactor_sp011959105	Acetatifactor_sp011959105	K06384	35492	NODE_493_length_36152_cov_12_277004	None	stage II sporulation protein M
953	Acetatifactor_sp011959105	Acetatifactor_sp011959105	K03565	35495	NODE_493_length_36152_cov_12_277004	None	regulatory protein
954	Acetatifactor_sp011959105	Acetatifactor_sp011959105	K06385	35470	NODE_493_length_36152_cov_12_277004	None	stage II sporulation protein P
955	Acetatifactor_sp011959105	Acetatifactor_sp011959105	K09777	35502	NODE_493_length_36152_cov_12_277004	None	uncharacterized protein
956	Acetatifactor_sp011959105	Acetatifactor_sp011959105	K14441	35499	NODE_493_length_36152_cov_12_277004	None	ribosomal protein S12 methylthiotransferase [EC:2.8.4.4]
957	Acetatifactor_sp011959105	Acetatifactor_sp011959105	K04487	35488	NODE_493_length_36152_cov_12_277004	None	cysteine desulfurase [EC:2.8.1.7]
958	Acetatifactor_sp011959105	Acetatifactor_sp011959105	K04487	8301	NODE_132_length_82334_cov_15_986473	None	cysteine desulfurase [EC:2.8.1.7]
959	Acetatifactor_sp011959105	Acetatifactor_sp011959105	K03060	35500	NODE_493_length_36152_cov_12_277004	None	DNA-directed RNA polymerase subunit omega [EC:2.7.7.6]
960	Acetatifactor_sp011959105	Acetatifactor_sp011959105	K18682	35494	NODE_493_length_36152_cov_12_277004	None	ribonucrease Y [EC:3.1.-.-]
961	Acetatifactor_sp011959105	Acetatifactor_sp011959105	K04488	35487	NODE_493_length_36152_cov_12_277004	None	nitrogen fixation protein NifU and related proteins
962	Acetatifactor_sp011959105	Acetatifactor_sp011959105	K00995	35498	NODE_493_length_36152_cov_12_277004	None	CDP-diacylglycerol---glycerol-3-phosphate 3-phosphatidyltransferase [EC:2.7.8.5]
963	Acetatifactor_sp011959105	Acetatifactor_sp011959105	K00566	35486	NODE_493_length_36152_cov_12_277004	None	tRNA-uridine 2-sulfurtransferase [EC:2.8.1.13]
964	Acetatifactor_sp011959105	Acetatifactor_sp011959105	K03694	35482	NODE_493_length_36152_cov_12_277004	None	ATP-dependent Clp protease ATP-binding subunit ClpA
965	Acetatifactor_sp011959105	Acetatifactor_sp011959105	K02968	35472	NODE_493_length_36152_cov_12_277004	None	small subunit ribosomal protein S20
966	Acetatifactor_sp011959105	Acetatifactor_sp011959105	K06891	35483	NODE_493_length_36152_cov_12_277004	None	ATP-dependent Clp protease adaptor protein ClpS
967	Acetatifactor_sp011959105	Acetatifactor_sp011959105	K03743	35497	NODE_493_length_36152_cov_12_277004	None	nicotinamide-nucleotide amidase [EC:3.5.1.42]
968	Acetatifactor_sp011959105	Acetatifactor_sp011959105	K03742	35497	NODE_493_length_36152_cov_12_277004	None	nicotinamide-nucleotide amidase [EC:3.5.1.42]
969	Acetatifactor_sp011959105	Acetatifactor_sp011959105	K04763	30728	NODE_98_length_96321_cov_12_702356	None	integrase/recombinase XerD
970	Acetatifactor_sp011959105	Acetatifactor_sp011959105	K04763	35491	NODE_493_length_36152_cov_12_277004	None	integrase/recombinase XerD
971	Acetatifactor_sp011959105	Acetatifactor_sp011959105	K04763	14439	NODE_15_length_192602_cov_15_584621	None	integrase/recombinase XerD
972	Acetatifactor_sp011959105	Acetatifactor_sp011959105	K03553	35496	NODE_493_length_36152_cov_12_277004	None	recombination protein RecA
973	Acetatifactor_sp011959105	Acetatifactor_sp011959105	K06012	35471	NODE_493_length_36152_cov_12_277004	None	spore protease [EC:3.4.24.78]
974	Acetatifactor_sp011959105	Acetatifactor_sp011959105	K06023	16885	NODE_252_length_57645_cov_14_428165	None	HPr kinase/phosphorylase [EC:2.7.11.- 2.7.4.-]
975	Acetatifactor_sp011959105	Acetatifactor_sp011959105	K07258	16877	NODE_252_length_57645_cov_14_428165	None	serine-type D-Ala-D-Ala carboxypeptidase (penicillin-binding protein 5/6) [EC:3.4.16.4]
976	Acetatifactor_sp011959105	Acetatifactor_sp011959105	K07258	37166	NODE_181_length_70068_cov_11_923186	None	serine-type D-Ala-D-Ala carboxypeptidase (penicillin-binding protein 5/6) [EC:3.4.16.4]
977	Acetatifactor_sp011959105	Acetatifactor_sp011959105	K07258	23152	NODE_482_length_36746_cov_13_125835	None	serine-type D-Ala-D-Ala carboxypeptidase (penicillin-binding protein 5/6) [EC:3.4.16.4]
978	Acetatifactor_sp011959105	Acetatifactor_sp011959105	K07258	37171	NODE_181_length_70068_cov_11_923186	None	serine-type D-Ala-D-Ala carboxypeptidase (penicillin-binding protein 5/6) [EC:3.4.16.4]
979	Acetatifactor_sp011959105	Acetatifactor_sp011959105	K07258	24116	NODE_220_length_62708_cov_13_080475	None	serine-type D-Ala-D-Ala carboxypeptidase (penicillin-binding protein 5/6) [EC:3.4.16.4]
980	Acetatifactor_sp011959105	Acetatifactor_sp011959105	K07258	30748	NODE_98_length_96321_cov_12_702356	None	serine-type D-Ala-D-Ala carboxypeptidase (penicillin-binding protein 5/6) [EC:3.4.16.4]
981	Acetatifactor_sp011959105	Acetatifactor_sp011959105	K06958	16888	NODE_252_length_57645_cov_14_428165	None	RNase adapter protein RapZ
982	Acetatifactor_sp011959105	Acetatifactor_sp011959105	K03439	16878	NODE_252_length_57645_cov_14_428165	None	tRNA (guanine-N7-)-methyltransferase [EC:2.1.1.33]
983	Acetatifactor_sp011959105	Acetatifactor_sp011959105	K06421	16901	NODE_1051_length_19798_cov_13_901281	None	small acid-soluble spore protein D (minor alpha/beta-type SASP)
984	Acetatifactor_sp011959105	Acetatifactor_sp011959105	K19689	16905	NODE_1051_length_19798_cov_13_901281	None	aminopeptidase [EC:3.4.11.-]
985	Acetatifactor_sp011959105	Acetatifactor_sp011959105	K01881	16872	NODE_252_length_57645_cov_14_428165	None	prolyl-tRNA synthetase [EC:6.1.1.15]
986	Acetatifactor_sp011959105	Acetatifactor_sp011959105	K03703	16883	NODE_252_length_57645_cov_14_428165	None	excinuclease ABC subunit C
987	Acetatifactor_sp011959105	Acetatifactor_sp011959105	K04087	16896	NODE_252_length_57645_cov_14_428165	None	modulator of FtsH protease HflC
988	Acetatifactor_sp011959105	Acetatifactor_sp011959105	K09762	16889	NODE_252_length_57645_cov_14_428165	None	uncharacterized protein
989	Acetatifactor_sp011959105	Acetatifactor_sp011959105	K07029	16891	NODE_252_length_57645_cov_14_428165	None	diacylglycerol kinase (ATP) [EC:2.7.1.107]
990	Acetatifactor_sp011959105	Acetatifactor_sp011959105	K07029	5	NODE_61_length_118937_cov_14_458236	None	diacylglycerol kinase (ATP) [EC:2.7.1.107]
991	Acetatifactor_sp011959105	Acetatifactor_sp011959105	K02784	16890	NODE_252_length_57645_cov_14_428165	None	phosphocarrier protein HPr
992	Acetatifactor_sp011959105	Acetatifactor_sp011959105	K02784	14383	NODE_15_length_192602_cov_15_584621	None	phosphocarrier protein HPr
993	Acetatifactor_sp011959105	Acetatifactor_sp011959105	K04485	16914	NODE_1051_length_19798_cov_13_901281	None	DNA repair protein RadA/Sms
994	Acetatifactor_sp011959105	Acetatifactor_sp011959105	K03671	16879	NODE_252_length_57645_cov_14_428165	None	thioredoxin 1
995	Acetatifactor_sp011959105	Acetatifactor_sp011959105	K10947	14440	NODE_15_length_192602_cov_15_584621	None	PadR family transcriptional regulator, regulatory protein PadR
996	Acetatifactor_sp011959105	Acetatifactor_sp011959105	K10947	16874	NODE_252_length_57645_cov_14_428165	None	PadR family transcriptional regulator, regulatory protein PadR
997	Acetatifactor_sp011959105	Acetatifactor_sp011959105	K10947	69	NODE_61_length_118937_cov_14_458236	None	PadR family transcriptional regulator, regulatory protein PadR
998	Acetatifactor_sp011959105	Acetatifactor_sp011959105	K10947	21709	NODE_204_length_65612_cov_16_144515	None	PadR family transcriptional regulator, regulatory protein PadR
999	Acetatifactor_sp011959105	Acetatifactor_sp011959105	K03696	16913	NODE_1051_length_19798_cov_13_901281	None	ATP-dependent Clp protease ATP-binding subunit ClpC
1000	Acetatifactor_sp011959105	Acetatifactor_sp011959105	K04088	16897	NODE_252_length_57645_cov_14_428165	None	modulator of FtsH protease HflK
1001	Acetatifactor_sp011959105	Acetatifactor_sp011959105	K00075	16887	NODE_252_length_57645_cov_14_428165	None	UDP-N-acetylmuramate dehydrogenase [EC:1.3.1.98]
1002	Acetatifactor_sp011959105	Acetatifactor_sp011959105	K06969	9359	NODE_21_length_173674_cov_16_583087	None	23S rRNA (cytosine1962-C5)-methyltransferase [EC:2.1.1.191]
1003	Acetatifactor_sp011959105	Acetatifactor_sp011959105	K06969	16855	NODE_252_length_57645_cov_14_428165	None	23S rRNA (cytosine1962-C5)-methyltransferase [EC:2.1.1.191]
1004	Acetatifactor_sp011959105	Acetatifactor_sp011959105	K03768	20080	NODE_13_length_205171_cov_15_453119	None	peptidyl-prolyl cis-trans isomerase B (cyclophilin B) [EC:5.2.1.8]
1005	Acetatifactor_sp011959105	Acetatifactor_sp011959105	K03768	16893	NODE_252_length_57645_cov_14_428165	None	peptidyl-prolyl cis-trans isomerase B (cyclophilin B) [EC:5.2.1.8]
1006	Acetatifactor_sp011959105	Acetatifactor_sp011959105	K11621	67	NODE_61_length_118937_cov_14_458236	None	lia operon protein LiaG
1007	Acetatifactor_sp011959105	Acetatifactor_sp011959105	K11621	16875	NODE_252_length_57645_cov_14_428165	None	lia operon protein LiaG
1008	Acetatifactor_sp011959105	Acetatifactor_sp011959105	K03790	16894	NODE_252_length_57645_cov_14_428165	None	[ribosomal protein S5]-alanine N-acetyltransferase [EC:2.3.1.267]
1009	Acetatifactor_sp011959105	Acetatifactor_sp011959105	K03790	32171	NODE_114_length_91042_cov_14_159297	None	[ribosomal protein S5]-alanine N-acetyltransferase [EC:2.3.1.267]
1010	Acetatifactor_sp011959105	Acetatifactor_sp011959105	K03790	14422	NODE_15_length_192602_cov_15_584621	None	[ribosomal protein S5]-alanine N-acetyltransferase [EC:2.3.1.267]
1011	Acetatifactor_sp011959105	Acetatifactor_sp011959105	K03790	13462	NODE_41_length_132337_cov_18_822122	None	[ribosomal protein S5]-alanine N-acetyltransferase [EC:2.3.1.267]
1012	Acetatifactor_sp011959105	Acetatifactor_sp011959105	K03790	23166	NODE_482_length_36746_cov_13_125835	None	[ribosomal protein S5]-alanine N-acetyltransferase [EC:2.3.1.267]
1013	Acetatifactor_sp011959105	Acetatifactor_sp011959105	K22132	24979	NODE_8442_length_4140_cov_15_160588	None	tRNA threonylcarbamoyladenosine dehydratase
1014	Acetatifactor_sp011959105	Acetatifactor_sp011959105	K03616	37190	NODE_181_length_70068_cov_11_923186	None	Na+-translocating ferredoxin:NAD+ oxidoreductase subunit B [EC:7.2.1.2]
1015	Acetatifactor_sp011959105	Acetatifactor_sp011959105	K03617	37189	NODE_181_length_70068_cov_11_923186	None	Na+-translocating ferredoxin:NAD+ oxidoreductase subunit A
1016	Acetatifactor_sp011959105	Acetatifactor_sp011959105	K03615	37185	NODE_181_length_70068_cov_11_923186	None	Na+-translocating ferredoxin:NAD+ oxidoreductase subunit C [EC:7.2.1.2]
1017	Acetatifactor_sp011959105	Acetatifactor_sp011959105	K03614	37186	NODE_181_length_70068_cov_11_923186	None	Na+-translocating ferredoxin:NAD+ oxidoreductase subunit D [EC:7.2.1.2]
1018	Acetatifactor_sp011959105	Acetatifactor_sp011959105	K07502	37184	NODE_181_length_70068_cov_11_923186	None	uncharacterized protein
1019	Acetatifactor_sp011959105	Acetatifactor_sp011959105	K07098	37167	NODE_181_length_70068_cov_11_923186	None	uncharacterized protein
1020	Acetatifactor_sp011959105	Acetatifactor_sp011959105	K06972	37147	NODE_181_length_70068_cov_11_923186	None	presequence protease [EC:3.4.24.-]
1021	Acetatifactor_sp011959105	Acetatifactor_sp011959105	K03613	37188	NODE_181_length_70068_cov_11_923186	None	Na+-translocating ferredoxin:NAD+ oxidoreductase subunit E
1022	Acetatifactor_sp011959105	Acetatifactor_sp011959105	K05896	37168	NODE_181_length_70068_cov_11_923186	None	segregation and condensation protein A
1023	Acetatifactor_sp011959105	Acetatifactor_sp011959105	K06024	37169	NODE_181_length_70068_cov_11_923186	None	segregation and condensation protein B
1024	Acetatifactor_sp011959105	Acetatifactor_sp011959105	K03612	37187	NODE_181_length_70068_cov_11_923186	None	Na+-translocating ferredoxin:NAD+ oxidoreductase subunit G
1025	Acetatifactor_sp011959105	Acetatifactor_sp011959105	K01880	37156	NODE_181_length_70068_cov_11_923186	None	glycyl-tRNA synthetase [EC:6.1.1.14]
1026	Acetatifactor_sp011959105	Acetatifactor_sp011959105	K04045	37158	NODE_181_length_70068_cov_11_923186	None	molecular chaperone HscC
1027	Acetatifactor_sp011959105	Acetatifactor_sp011959105	K20509	37175	NODE_181_length_70068_cov_11_923186	None	carboxybiotin decarboxylase [EC:7.2.4.1]
1028	Acetatifactor_sp011959105	Acetatifactor_sp011959105	K02970	37164	NODE_181_length_70068_cov_11_923186	None	small subunit ribosomal protein S21
1029	Acetatifactor_sp011959105	Acetatifactor_sp011959105	K03665	37200	NODE_181_length_70068_cov_11_923186	None	GTPase
1030	Acetatifactor_sp011959105	Acetatifactor_sp011959105	K02945	37182	NODE_181_length_70068_cov_11_923186	None	small subunit ribosomal protein S1
1031	Acetatifactor_sp011959105	Acetatifactor_sp011959105	K23352	37173	NODE_181_length_70068_cov_11_923186	None	glutaconyl-CoA/methylmalonyl-CoA decarboxylase subunit delta
1032	Acetatifactor_sp011959105	Acetatifactor_sp011959105	K00945	37180	NODE_181_length_70068_cov_11_923186	None	CMP/dCMP kinase [EC:2.7.4.25]
1033	Acetatifactor_sp011959105	Acetatifactor_sp011959105	K00945	30740	NODE_98_length_96321_cov_12_702356	None	CMP/dCMP kinase [EC:2.7.4.25]
1034	Acetatifactor_sp011959105	Acetatifactor_sp011959105	K01872	37160	NODE_181_length_70068_cov_11_923186	None	alanyl-tRNA synthetase [EC:6.1.1.7]
1035	Acetatifactor_sp011959105	Acetatifactor_sp011959105	K19295	37193	NODE_181_length_70068_cov_11_923186	None	alginate O-acetyltransferase complex protein AlgJ
1036	Acetatifactor_sp011959105	Acetatifactor_sp011959105	K19295	37151	NODE_181_length_70068_cov_11_923186	None	alginate O-acetyltransferase complex protein AlgJ
1037	Acetatifactor_sp011959105	Acetatifactor_sp011959105	K03595	37149	NODE_181_length_70068_cov_11_923186	None	GTPase
1038	Acetatifactor_sp011959105	Acetatifactor_sp011959105	K03584	37150	NODE_181_length_70068_cov_11_923186	None	DNA repair protein RecO (recombination protein O)
1039	Acetatifactor_sp011959105	Acetatifactor_sp011959105	K15921	20202	NODE_645_length_28654_cov_14_481835	None	arabinoxylan arabinofuranohydrolase [EC:3.2.1.55]
1040	Acetatifactor_sp011959105	Acetatifactor_sp011959105	K15921	13507	NODE_3771_length_7398_cov_15_746834	None	arabinoxylan arabinofuranohydrolase [EC:3.2.1.55]
1041	Acetatifactor_sp011959105	Acetatifactor_sp011959105	K15921	20205	NODE_645_length_28654_cov_14_481835	None	arabinoxylan arabinofuranohydrolase [EC:3.2.1.55]
1042	Acetatifactor_sp011959105	Acetatifactor_sp011959105	K03574	20192	NODE_13_length_205171_cov_15_453119	None	8-oxo-dGTP diphosphatase [EC:3.6.1.55]
1043	Acetatifactor_sp011959105	Acetatifactor_sp011959105	K03574	10736	NODE_38_length_136065_cov_13_341416	None	8-oxo-dGTP diphosphatase [EC:3.6.1.55]
1044	Acetatifactor_sp011959105	Acetatifactor_sp011959105	K03574	13427	NODE_41_length_132337_cov_18_822122	None	8-oxo-dGTP diphosphatase [EC:3.6.1.55]
1045	Acetatifactor_sp011959105	Acetatifactor_sp011959105	K03574	20053	NODE_13_length_205171_cov_15_453119	None	8-oxo-dGTP diphosphatase [EC:3.6.1.55]
1046	Acetatifactor_sp011959105	Acetatifactor_sp011959105	K03574	6268	NODE_157_length_74937_cov_20_326313	None	8-oxo-dGTP diphosphatase [EC:3.6.1.55]
1047	Acetatifactor_sp011959105	Acetatifactor_sp011959105	K06223	20092	NODE_13_length_205171_cov_15_453119	None	DNA adenine methylase [EC:2.1.1.72]
1048	Acetatifactor_sp011959105	Acetatifactor_sp011959105	K03563	20060	NODE_13_length_205171_cov_15_453119	None	carbon storage regulator
1049	Acetatifactor_sp011959105	Acetatifactor_sp011959105	K01567	20185	NODE_13_length_205171_cov_15_453119	None	peptidoglycan-N-acetylmuramic acid deacetylase [EC:3.5.1.-]
1050	Acetatifactor_sp011959105	Acetatifactor_sp011959105	K17675	20189	NODE_13_length_205171_cov_15_453119	None	ATP-dependent RNA helicase SUPV3L1/SUV3 [EC:3.6.4.13]
1051	Acetatifactor_sp011959105	Acetatifactor_sp011959105	K19304	14400	NODE_15_length_192602_cov_15_584621	None	murein DD-endopeptidase [EC:3.4.24.-]
1052	Acetatifactor_sp011959105	Acetatifactor_sp011959105	K19304	20164	NODE_13_length_205171_cov_15_453119	None	murein DD-endopeptidase [EC:3.4.24.-]
1053	Acetatifactor_sp011959105	Acetatifactor_sp011959105	K02337	20160	NODE_13_length_205171_cov_15_453119	None	DNA polymerase III subunit alpha [EC:2.7.7.7]
1054	Acetatifactor_sp011959105	Acetatifactor_sp011959105	K01512	20193	NODE_13_length_205171_cov_15_453119	None	acylphosphatase [EC:3.6.1.7]
1055	Acetatifactor_sp011959105	Acetatifactor_sp011959105	K02422	20057	NODE_13_length_205171_cov_15_453119	None	flagellar secretion chaperone FliS
1056	Acetatifactor_sp011959105	Acetatifactor_sp011959105	K02422	21682	NODE_204_length_65612_cov_16_144515	None	flagellar secretion chaperone FliS
1057	Acetatifactor_sp011959105	Acetatifactor_sp011959105	K06915	20091	NODE_13_length_205171_cov_15_453119	None	uncharacterized protein
1058	Acetatifactor_sp011959105	Acetatifactor_sp011959105	K06915	1190	NODE_35_length_142391_cov_15_490389	None	uncharacterized protein
1059	Acetatifactor_sp011959105	Acetatifactor_sp011959105	K06518	20085	NODE_13_length_205171_cov_15_453119	None	holin-like protein
1060	Acetatifactor_sp011959105	Acetatifactor_sp011959105	K00790	26746	NODE_271_length_55077_cov_12_571444	None	UDP-N-acetylglucosamine 1-carboxyvinyltransferase [EC:2.5.1.7]
1061	Acetatifactor_sp011959105	Acetatifactor_sp011959105	K00790	20163	NODE_13_length_205171_cov_15_453119	None	UDP-N-acetylglucosamine 1-carboxyvinyltransferase [EC:2.5.1.7]
1062	Acetatifactor_sp011959105	Acetatifactor_sp011959105	K02397	20062	NODE_13_length_205171_cov_15_453119	None	flagellar hook-associated protein 3 FlgL
1063	Acetatifactor_sp011959105	Acetatifactor_sp011959105	K02396	20064	NODE_13_length_205171_cov_15_453119	None	flagellar hook-associated protein 1
1064	Acetatifactor_sp011959105	Acetatifactor_sp011959105	K02396	20063	NODE_13_length_205171_cov_15_453119	None	flagellar hook-associated protein 1
1065	Acetatifactor_sp011959105	Acetatifactor_sp011959105	K07340	20155	NODE_13_length_205171_cov_15_453119	None	inner membrane protein
1066	Acetatifactor_sp011959105	Acetatifactor_sp011959105	K03654	20078	NODE_13_length_205171_cov_15_453119	None	ATP-dependent DNA helicase RecQ [EC:3.6.4.12]
1067	Acetatifactor_sp011959105	Acetatifactor_sp011959105	K20488	32177	NODE_114_length_91042_cov_14_159297	None	two-component system, OmpR family, lantibiotic biosynthesis response regulator NisR/SpaR
1068	Acetatifactor_sp011959105	Acetatifactor_sp011959105	K20488	36301	NODE_213_length_64308_cov_13_756245	None	two-component system, OmpR family, lantibiotic biosynthesis response regulator NisR/SpaR
1069	Acetatifactor_sp011959105	Acetatifactor_sp011959105	K20488	20198	NODE_13_length_205171_cov_15_453119	None	two-component system, OmpR family, lantibiotic biosynthesis response regulator NisR/SpaR
1070	Acetatifactor_sp011959105	Acetatifactor_sp011959105	K07816	20168	NODE_13_length_205171_cov_15_453119	None	putative GTP pyrophosphokinase [EC:2.7.6.5]
1071	Acetatifactor_sp011959105	Acetatifactor_sp011959105	K07816	1191	NODE_35_length_142391_cov_15_490389	None	putative GTP pyrophosphokinase [EC:2.7.6.5]
1072	Acetatifactor_sp011959105	Acetatifactor_sp011959105	K07816	21712	NODE_204_length_65612_cov_16_144515	None	putative GTP pyrophosphokinase [EC:2.7.6.5]
1073	Acetatifactor_sp011959105	Acetatifactor_sp011959105	K05540	20149	NODE_13_length_205171_cov_15_453119	None	tRNA-dihydrouridine synthase B [EC:1.-.-.-]
1074	Acetatifactor_sp011959105	Acetatifactor_sp011959105	K14459	20120	NODE_13_length_205171_cov_15_453119	None	hexosaminidase [EC:3.2.1.52]
1075	Acetatifactor_sp011959105	Acetatifactor_sp011959105	K02398	20066	NODE_13_length_205171_cov_15_453119	None	negative regulator of flagellin synthesis FlgM
1076	Acetatifactor_sp011959105	Acetatifactor_sp011959105	K02399	20065	NODE_13_length_205171_cov_15_453119	None	flagellar biosynthesis protein FlgN
1077	Acetatifactor_sp011959105	Acetatifactor_sp011959105	K13653	21700	NODE_204_length_65612_cov_16_144515	None	AraC family transcriptional regulator
1078	Acetatifactor_sp011959105	Acetatifactor_sp011959105	K13653	2314	NODE_302_length_51364_cov_13_428170	None	AraC family transcriptional regulator
1079	Acetatifactor_sp011959105	Acetatifactor_sp011959105	K13653	14459	NODE_15_length_192602_cov_15_584621	None	AraC family transcriptional regulator
1080	Acetatifactor_sp011959105	Acetatifactor_sp011959105	K13653	20110	NODE_13_length_205171_cov_15_453119	None	AraC family transcriptional regulator
1081	Acetatifactor_sp011959105	Acetatifactor_sp011959105	K13653	23163	NODE_482_length_36746_cov_13_125835	None	AraC family transcriptional regulator
1082	Acetatifactor_sp011959105	Acetatifactor_sp011959105	K13653	32127	NODE_114_length_91042_cov_14_159297	None	AraC family transcriptional regulator
1083	Acetatifactor_sp011959105	Acetatifactor_sp011959105	K11068	20170	NODE_13_length_205171_cov_15_453119	None	hemolysin III
1084	Acetatifactor_sp011959105	Acetatifactor_sp011959105	K03524	20152	NODE_13_length_205171_cov_15_453119	None	BirA family transcriptional regulator, biotin operon repressor / biotin---[acetyl-CoA-carboxylase] ligase [EC:6.3.4.15]
1085	Acetatifactor_sp011959105	Acetatifactor_sp011959105	K09803	20184	NODE_13_length_205171_cov_15_453119	None	uncharacterized protein
1086	Acetatifactor_sp011959105	Acetatifactor_sp011959105	K02407	20058	NODE_13_length_205171_cov_15_453119	None	flagellar hook-associated protein 2
1087	Acetatifactor_sp011959105	Acetatifactor_sp011959105	K02407	78	NODE_61_length_118937_cov_14_458236	None	flagellar hook-associated protein 2
1088	Acetatifactor_sp011959105	Acetatifactor_sp011959105	K15531	20218	NODE_645_length_28654_cov_14_481835	None	oligosaccharide reducing-end xylanase [EC:3.2.1.156]
1089	Acetatifactor_sp011959105	Acetatifactor_sp011959105	K13626	20061	NODE_13_length_205171_cov_15_453119	None	flagellar assembly factor FliW
1090	Acetatifactor_sp011959105	Acetatifactor_sp011959105	K03437	20158	NODE_13_length_205171_cov_15_453119	None	RNA methyltransferase, TrmH family
1091	Acetatifactor_sp011959105	Acetatifactor_sp011959105	K03437	38095	NODE_180_length_70124_cov_13_959511	None	RNA methyltransferase, TrmH family
1092	Acetatifactor_sp011959105	Acetatifactor_sp011959105	K04567	20146	NODE_13_length_205171_cov_15_453119	None	lysyl-tRNA synthetase, class II [EC:6.1.1.6]
1093	Acetatifactor_sp011959105	Acetatifactor_sp011959105	K07456	20048	NODE_13_length_205171_cov_15_453119	None	DNA mismatch repair protein MutS2
1094	Acetatifactor_sp011959105	Acetatifactor_sp011959105	K01192	20028	NODE_13_length_205171_cov_15_453119	None	beta-mannosidase [EC:3.2.1.25]
1095	Acetatifactor_sp011959105	Acetatifactor_sp011959105	K06603	20059	NODE_13_length_205171_cov_15_453119	None	flagellar protein FlaG
1096	Acetatifactor_sp011959105	Acetatifactor_sp011959105	K06962	32132	NODE_114_length_91042_cov_14_159297	None	uncharacterized protein
1097	Acetatifactor_sp011959105	Acetatifactor_sp011959105	K18220	7281	NODE_207_length_65192_cov_17_114190	None	ribosomal protection tetracycline resistance protein
1098	Acetatifactor_sp011959105	Acetatifactor_sp011959105	K18220	32132	NODE_114_length_91042_cov_14_159297	None	ribosomal protection tetracycline resistance protein
1099	Acetatifactor_sp011959105	Acetatifactor_sp011959105	K01005	32164	NODE_114_length_91042_cov_14_159297	None	polyisoprenyl-teichoic acid--peptidoglycan teichoic acid transferase [EC:2.7.8.-]
1100	Acetatifactor_sp011959105	Acetatifactor_sp011959105	K01005	14341	NODE_15_length_192602_cov_15_584621	None	polyisoprenyl-teichoic acid--peptidoglycan teichoic acid transferase [EC:2.7.8.-]
1101	Acetatifactor_sp011959105	Acetatifactor_sp011959105	K01005	1252	NODE_1421_length_15289_cov_13_777865	None	polyisoprenyl-teichoic acid--peptidoglycan teichoic acid transferase [EC:2.7.8.-]
1102	Acetatifactor_sp011959105	Acetatifactor_sp011959105	K03070	32110	NODE_114_length_91042_cov_14_159297	None	preprotein translocase subunit SecA [EC:7.4.2.8]
1103	Acetatifactor_sp011959105	Acetatifactor_sp011959105	K04079	32117	NODE_114_length_91042_cov_14_159297	None	molecular chaperone HtpG
1104	Acetatifactor_sp011959105	Acetatifactor_sp011959105	K20487	32178	NODE_114_length_91042_cov_14_159297	None	two-component system, OmpR family, lantibiotic biosynthesis sensor histidine kinase NisK/SpaK [EC:2.7.13.3]
1105	Acetatifactor_sp011959105	Acetatifactor_sp011959105	K20487	36300	NODE_213_length_64308_cov_13_756245	None	two-component system, OmpR family, lantibiotic biosynthesis sensor histidine kinase NisK/SpaK [EC:2.7.13.3]
1106	Acetatifactor_sp011959105	Acetatifactor_sp011959105	K20487	20197	NODE_13_length_205171_cov_15_453119	None	two-component system, OmpR family, lantibiotic biosynthesis sensor histidine kinase NisK/SpaK [EC:2.7.13.3]
1107	Acetatifactor_sp011959105	Acetatifactor_sp011959105	K07576	32124	NODE_114_length_91042_cov_14_159297	None	metallo-beta-lactamase family protein
1108	Acetatifactor_sp011959105	Acetatifactor_sp011959105	K01066	32128	NODE_114_length_91042_cov_14_159297	None	acetyl esterase [EC:3.1.1.-]
1109	Acetatifactor_sp011959105	Acetatifactor_sp011959105	K02836	32109	NODE_114_length_91042_cov_14_159297	None	peptide chain release factor 2
1110	Acetatifactor_sp011959105	Acetatifactor_sp011959105	K07027	32134	NODE_114_length_91042_cov_14_159297	None	glycosyltransferase 2 family protein
1111	Acetatifactor_sp011959105	Acetatifactor_sp011959105	K03724	32155	NODE_114_length_91042_cov_14_159297	None	ATP-dependent helicase Lhr and Lhr-like helicase [EC:3.6.4.-]
1112	Acetatifactor_sp011959105	Acetatifactor_sp011959105	K15652	32129	NODE_114_length_91042_cov_14_159297	None	3-dehydroshikimate dehydratase [EC:4.2.1.118]
1113	Acetatifactor_sp011959105	Acetatifactor_sp011959105	K03547	32120	NODE_114_length_91042_cov_14_159297	None	DNA repair protein SbcD/Mre11
1114	Acetatifactor_sp011959105	Acetatifactor_sp011959105	K03546	32119	NODE_114_length_91042_cov_14_159297	None	DNA repair protein SbcC/Rad50
1115	Acetatifactor_sp011959105	Acetatifactor_sp011959105	K18830	32114	NODE_114_length_91042_cov_14_159297	None	HTH-type transcriptional regulator / antitoxin PezA
1116	Acetatifactor_sp011959105	Acetatifactor_sp011959105	K18830	13435	NODE_41_length_132337_cov_18_822122	None	HTH-type transcriptional regulator / antitoxin PezA
1117	Acetatifactor_sp011959105	Acetatifactor_sp011959105	K03628	23158	NODE_482_length_36746_cov_13_125835	None	transcription termination factor Rho
1118	Acetatifactor_sp011959105	Acetatifactor_sp011959105	K07139	23156	NODE_482_length_36746_cov_13_125835	None	uncharacterized protein
1119	Acetatifactor_sp011959105	Acetatifactor_sp011959105	K02493	23161	NODE_482_length_36746_cov_13_125835	None	release factor glutamine methyltransferase [EC:2.1.1.297]
1120	Acetatifactor_sp011959105	Acetatifactor_sp011959105	K02035	23167	NODE_482_length_36746_cov_13_125835	None	peptide/nickel transport system substrate-binding protein
1121	Acetatifactor_sp011959105	Acetatifactor_sp011959105	K00027	23157	NODE_482_length_36746_cov_13_125835	None	malate dehydrogenase (oxaloacetate-decarboxylating) [EC:1.1.1.38]
1122	Acetatifactor_sp011959105	Acetatifactor_sp011959105	K07181	23154	NODE_482_length_36746_cov_13_125835	None	c-di-GMP phosphodiesterase [EC:3.1.4.52]
1123	Acetatifactor_sp011959105	Acetatifactor_sp011959105	K09780	23169	NODE_482_length_36746_cov_13_125835	None	uncharacterized protein
1124	Acetatifactor_sp011959105	Acetatifactor_sp011959105	K02835	23162	NODE_482_length_36746_cov_13_125835	None	peptide chain release factor 1
1125	Acetatifactor_sp011959105	Acetatifactor_sp011959105	K02909	23159	NODE_482_length_36746_cov_13_125835	None	large subunit ribosomal protein L31
1126	Acetatifactor_sp011959105	Acetatifactor_sp011959105	K05515	30754	NODE_98_length_96321_cov_12_702356	None	penicillin-binding protein 2 [EC:3.4.16.4]
1127	Acetatifactor_sp011959105	Acetatifactor_sp011959105	K06183	30702	NODE_98_length_96321_cov_12_702356	None	16S rRNA pseudouridine516 synthase [EC:5.4.99.19]
1128	Acetatifactor_sp011959105	Acetatifactor_sp011959105	K03979	30736	NODE_98_length_96321_cov_12_702356	None	GTPase [EC:3.6.5.-]
1129	Acetatifactor_sp011959105	Acetatifactor_sp011959105	K02899	30737	NODE_98_length_96321_cov_12_702356	None	large subunit ribosomal protein L27
1130	Acetatifactor_sp011959105	Acetatifactor_sp011959105	K06180	30741	NODE_98_length_96321_cov_12_702356	None	23S rRNA pseudouridine1911/1915/1917 synthase [EC:5.4.99.23]
1131	Acetatifactor_sp011959105	Acetatifactor_sp011959105	K03610	30753	NODE_98_length_96321_cov_12_702356	None	septum site-determining protein MinC
1132	Acetatifactor_sp011959105	Acetatifactor_sp011959105	K03572	30762	NODE_98_length_96321_cov_12_702356	None	DNA mismatch repair protein MutL
1133	Acetatifactor_sp011959105	Acetatifactor_sp011959105	K02888	30739	NODE_98_length_96321_cov_12_702356	None	large subunit ribosomal protein L21
1134	Acetatifactor_sp011959105	Acetatifactor_sp011959105	K09710	30732	NODE_98_length_96321_cov_12_702356	None	ribosome-associated protein
1135	Acetatifactor_sp011959105	Acetatifactor_sp011959105	K02902	30688	NODE_98_length_96321_cov_12_702356	None	large subunit ribosomal protein L28
1136	Acetatifactor_sp011959105	Acetatifactor_sp011959105	K03571	30755	NODE_98_length_96321_cov_12_702356	None	rod shape-determining protein MreD
1137	Acetatifactor_sp011959105	Acetatifactor_sp011959105	K03570	30756	NODE_98_length_96321_cov_12_702356	None	rod shape-determining protein MreC
1138	Acetatifactor_sp011959105	Acetatifactor_sp011959105	K03700	30708	NODE_98_length_96321_cov_12_702356	None	recombination protein U
1139	Acetatifactor_sp011959105	Acetatifactor_sp011959105	K12960	30773	NODE_98_length_96321_cov_12_702356	None	5-methylthioadenosine/S-adenosylhomocysteine deaminase [EC:3.5.4.31 3.5.4.28]
1140	Acetatifactor_sp011959105	Acetatifactor_sp011959105	K06901	30772	NODE_98_length_96321_cov_12_702356	None	adenine/guanine/hypoxanthine permease
1141	Acetatifactor_sp011959105	Acetatifactor_sp011959105	K00791	30761	NODE_98_length_96321_cov_12_702356	None	tRNA dimethylallyltransferase [EC:2.5.1.75]
1142	Acetatifactor_sp011959105	Acetatifactor_sp011959105	K09772	30744	NODE_98_length_96321_cov_12_702356	None	cell division inhibitor SepF
1143	Acetatifactor_sp011959105	Acetatifactor_sp011959105	K04068	30766	NODE_98_length_96321_cov_12_702356	None	anaerobic ribonucleoside-triphosphate reductase activating protein [EC:1.97.1.4]
1144	Acetatifactor_sp011959105	Acetatifactor_sp011959105	K07574	30735	NODE_98_length_96321_cov_12_702356	None	RNA-binding protein
1145	Acetatifactor_sp011959105	Acetatifactor_sp011959105	K07560	30725	NODE_98_length_96321_cov_12_702356	None	D-aminoacyl-tRNA deacylase [EC:3.1.1.96]
1146	Acetatifactor_sp011959105	Acetatifactor_sp011959105	K01489	30774	NODE_98_length_96321_cov_12_702356	None	cytidine deaminase [EC:3.5.4.5]
1147	Acetatifactor_sp011959105	Acetatifactor_sp011959105	K07584	30738	NODE_98_length_96321_cov_12_702356	None	uncharacterized protein
1148	Acetatifactor_sp011959105	Acetatifactor_sp011959105	K03655	30691	NODE_98_length_96321_cov_12_702356	None	ATP-dependent DNA helicase RecG [EC:3.6.4.12]
1149	Acetatifactor_sp011959105	Acetatifactor_sp011959105	K14058	30727	NODE_98_length_96321_cov_12_702356	None	tRNA 2-thiocytidine biosynthesis protein TtcA
1150	Acetatifactor_sp011959105	Acetatifactor_sp011959105	K07030	30690	NODE_98_length_96321_cov_12_702356	None	uncharacterized protein
1151	Acetatifactor_sp011959105	Acetatifactor_sp011959105	K08303	30681	NODE_98_length_96321_cov_12_702356	None	putative protease [EC:3.4.-.-]
1152	Acetatifactor_sp011959105	Acetatifactor_sp011959105	K08303	8313	NODE_132_length_82334_cov_15_986473	None	putative protease [EC:3.4.-.-]
1153	Acetatifactor_sp011959105	Acetatifactor_sp011959105	K08316	30697	NODE_98_length_96321_cov_12_702356	None	16S rRNA (guanine966-N2)-methyltransferase [EC:2.1.1.171]
1154	Acetatifactor_sp011959105	Acetatifactor_sp011959105	K01734	30749	NODE_98_length_96321_cov_12_702356	None	methylglyoxal synthase [EC:4.2.3.3]
1155	Acetatifactor_sp011959105	Acetatifactor_sp011959105	K09779	30731	NODE_98_length_96321_cov_12_702356	None	uncharacterized protein
1156	Acetatifactor_sp011959105	Acetatifactor_sp011959105	K06997	30745	NODE_98_length_96321_cov_12_702356	None	PLP dependent protein
1157	Acetatifactor_sp011959105	Acetatifactor_sp011959105	K03569	14395	NODE_15_length_192602_cov_15_584621	None	rod shape-determining protein MreB and related proteins
1158	Acetatifactor_sp011959105	Acetatifactor_sp011959105	K03569	30757	NODE_98_length_96321_cov_12_702356	None	rod shape-determining protein MreB and related proteins
1159	Acetatifactor_sp011959105	Acetatifactor_sp011959105	K03555	30763	NODE_98_length_96321_cov_12_702356	None	DNA mismatch repair protein MutS
1160	Acetatifactor_sp011959105	Acetatifactor_sp011959105	K01356	30730	NODE_98_length_96321_cov_12_702356	None	repressor LexA [EC:3.4.21.88]
1161	Acetatifactor_sp011959105	Acetatifactor_sp011959105	K03608	30751	NODE_98_length_96321_cov_12_702356	None	cell division topological specificity factor
1162	Acetatifactor_sp011959105	Acetatifactor_sp011959105	K03783	30775	NODE_98_length_96321_cov_12_702356	None	purine-nucleoside phosphorylase [EC:2.4.2.1]
1163	Acetatifactor_sp011959105	Acetatifactor_sp011959105	K03609	30752	NODE_98_length_96321_cov_12_702356	None	septum site-determining protein MinD
1164	Acetatifactor_sp011959105	Acetatifactor_sp011959105	K09888	30680	NODE_98_length_96321_cov_12_702356	None	cell division protein ZapA
1165	Acetatifactor_sp011959105	Acetatifactor_sp011959105	K03778	30719	NODE_98_length_96321_cov_12_702356	None	D-lactate dehydrogenase [EC:1.1.1.28]
1166	Acetatifactor_sp011959105	Acetatifactor_sp011959105	K03630	30758	NODE_98_length_96321_cov_12_702356	None	DNA repair protein RadC
1167	Acetatifactor_sp011959105	Acetatifactor_sp011959105	K07124	30704	NODE_98_length_96321_cov_12_702356	None	uncharacterized protein
1168	Acetatifactor_sp011959105	Acetatifactor_sp011959105	K03550	30678	NODE_98_length_96321_cov_12_702356	None	holliday junction DNA helicase RuvA [EC:3.6.4.12]
1169	Acetatifactor_sp011959105	Acetatifactor_sp011959105	K01838	30703	NODE_98_length_96321_cov_12_702356	None	beta-phosphoglucomutase [EC:5.4.2.6]
1170	Acetatifactor_sp011959105	Acetatifactor_sp011959105	K03551	30679	NODE_98_length_96321_cov_12_702356	None	holliday junction DNA helicase RuvB [EC:3.6.4.12]
1171	Acetatifactor_sp011959105	Acetatifactor_sp011959105	K03789	24092	NODE_220_length_62708_cov_13_080475	None	[ribosomal protein S18]-alanine N-acetyltransferase [EC:2.3.1.266]
1172	Acetatifactor_sp011959105	Acetatifactor_sp011959105	K03830	24107	NODE_220_length_62708_cov_13_080475	None	putative acetyltransferase [EC:2.3.1.-]
1173	Acetatifactor_sp011959105	Acetatifactor_sp011959105	K23675	24096	NODE_220_length_62708_cov_13_080475	None	riboflavin transporter
1174	Acetatifactor_sp011959105	Acetatifactor_sp011959105	K23675	66	NODE_61_length_118937_cov_14_458236	None	riboflavin transporter
1175	Acetatifactor_sp011959105	Acetatifactor_sp011959105	K19265	24113	NODE_220_length_62708_cov_13_080475	None	L-glyceraldehyde 3-phosphate reductase [EC:1.1.1.-]
1176	Acetatifactor_sp011959105	Acetatifactor_sp011959105	K13993	24112	NODE_220_length_62708_cov_13_080475	None	HSP20 family protein
1177	Acetatifactor_sp011959105	Acetatifactor_sp011959105	K14742	24093	NODE_220_length_62708_cov_13_080475	None	tRNA threonylcarbamoyladenosine biosynthesis protein TsaB
1178	Acetatifactor_sp011959105	Acetatifactor_sp011959105	K06959	24098	NODE_220_length_62708_cov_13_080475	None	protein Tex
1179	Acetatifactor_sp011959105	Acetatifactor_sp011959105	K22452	9522	NODE_21_length_173674_cov_16_583087	None	protein-glutamine gamma-glutamyltransferase [EC:2.3.2.13]
1180	Acetatifactor_sp011959105	Acetatifactor_sp011959105	K22452	24117	NODE_220_length_62708_cov_13_080475	None	protein-glutamine gamma-glutamyltransferase [EC:2.3.2.13]
1181	Acetatifactor_sp011959105	Acetatifactor_sp011959105	K18889	24130	NODE_220_length_62708_cov_13_080475	None	ATP-binding cassette, subfamily B, multidrug efflux pump
1182	Acetatifactor_sp011959105	Acetatifactor_sp011959105	K03660	24128	NODE_220_length_62708_cov_13_080475	None	N-glycosylase/DNA lyase [EC:3.2.2.- 4.2.99.18]
1183	Acetatifactor_sp011959105	Acetatifactor_sp011959105	K00784	24090	NODE_220_length_62708_cov_13_080475	None	ribonuclease Z [EC:3.1.26.11]
1184	Acetatifactor_sp011959105	Acetatifactor_sp011959105	K03924	12037	NODE_905_length_22491_cov_12_879881	None	MoxR-like ATPase [EC:3.6.3.-]
1185	Acetatifactor_sp011959105	Acetatifactor_sp011959105	K03924	24119	NODE_220_length_62708_cov_13_080475	None	MoxR-like ATPase [EC:3.6.3.-]
1186	Acetatifactor_sp011959105	Acetatifactor_sp011959105	K06925	24094	NODE_220_length_62708_cov_13_080475	None	tRNA threonylcarbamoyladenosine biosynthesis protein TsaE
1187	Acetatifactor_sp011959105	Acetatifactor_sp011959105	K10773	24127	NODE_220_length_62708_cov_13_080475	None	endonuclease III [EC:4.2.99.18]
1188	Acetatifactor_sp011959105	Acetatifactor_sp011959105	K18890	24129	NODE_220_length_62708_cov_13_080475	None	ATP-binding cassette, subfamily B, multidrug efflux pump
1189	Acetatifactor_sp011959105	Acetatifactor_sp011959105	K04758	10818	NODE_38_length_136065_cov_13_341416	None	ferrous iron transport protein A
1190	Acetatifactor_sp011959105	Acetatifactor_sp011959105	K04758	24110	NODE_220_length_62708_cov_13_080475	None	ferrous iron transport protein A
1191	Acetatifactor_sp011959105	Acetatifactor_sp011959105	K04758	24111	NODE_220_length_62708_cov_13_080475	None	ferrous iron transport protein A
1192	Acetatifactor_sp011959105	Acetatifactor_sp011959105	K04759	10817	NODE_38_length_136065_cov_13_341416	None	ferrous iron transport protein B
1193	Acetatifactor_sp011959105	Acetatifactor_sp011959105	K04759	24109	NODE_220_length_62708_cov_13_080475	None	ferrous iron transport protein B
1194	Acetatifactor_sp011959105	Acetatifactor_sp011959105	K01409	24088	NODE_220_length_62708_cov_13_080475	None	N6-L-threonylcarbamoyladenine synthase [EC:2.3.1.234]
1195	Acetatifactor_sp011959105	Acetatifactor_sp011959105	K02086	18007	NODE_30_length_149858_cov_15_556724	None	DNA replication protein
1196	Acetatifactor_sp011959105	Acetatifactor_sp011959105	K04769	18029	NODE_30_length_149858_cov_15_556724	None	AbrB family transcriptional regulator, stage V sporulation protein T
1197	Acetatifactor_sp011959105	Acetatifactor_sp011959105	K01775	10793	NODE_38_length_136065_cov_13_341416	None	alanine racemase [EC:5.1.1.1]
1198	Acetatifactor_sp011959105	Acetatifactor_sp011959105	K01775	18021	NODE_30_length_149858_cov_15_556724	None	alanine racemase [EC:5.1.1.1]
1199	Acetatifactor_sp011959105	Acetatifactor_sp011959105	K01776	18065	NODE_30_length_149858_cov_15_556724	None	glutamate racemase [EC:5.1.1.3]
1200	Acetatifactor_sp011959105	Acetatifactor_sp011959105	K06408	18097	NODE_2776_length_9111_cov_12_449647	None	stage V sporulation protein AF
1201	Acetatifactor_sp011959105	Acetatifactor_sp011959105	K20534	8352	NODE_132_length_82334_cov_15_986473	None	polyisoprenyl-phosphate glycosyltransferase [EC:2.4.-.-]
1202	Acetatifactor_sp011959105	Acetatifactor_sp011959105	K20534	18018	NODE_30_length_149858_cov_15_556724	None	polyisoprenyl-phosphate glycosyltransferase [EC:2.4.-.-]
1203	Acetatifactor_sp011959105	Acetatifactor_sp011959105	K20534	8324	NODE_132_length_82334_cov_15_986473	None	polyisoprenyl-phosphate glycosyltransferase [EC:2.4.-.-]
1204	Acetatifactor_sp011959105	Acetatifactor_sp011959105	K20534	10789	NODE_38_length_136065_cov_13_341416	None	polyisoprenyl-phosphate glycosyltransferase [EC:2.4.-.-]
1205	Acetatifactor_sp011959105	Acetatifactor_sp011959105	K20534	14381	NODE_15_length_192602_cov_15_584621	None	polyisoprenyl-phosphate glycosyltransferase [EC:2.4.-.-]
1206	Acetatifactor_sp011959105	Acetatifactor_sp011959105	K01921	18024	NODE_30_length_149858_cov_15_556724	None	D-alanine-D-alanine ligase [EC:6.3.2.4]
1207	Acetatifactor_sp011959105	Acetatifactor_sp011959105	K01921	18046	NODE_30_length_149858_cov_15_556724	None	D-alanine-D-alanine ligase [EC:6.3.2.4]
1208	Acetatifactor_sp011959105	Acetatifactor_sp011959105	K05799	18063	NODE_30_length_149858_cov_15_556724	None	GntR family transcriptional regulator, transcriptional repressor for pyruvate dehydrogenase complex
1209	Acetatifactor_sp011959105	Acetatifactor_sp011959105	K06131	1240	NODE_35_length_142391_cov_15_490389	None	cardiolipin synthase A/B [EC:2.7.8.-]
1210	Acetatifactor_sp011959105	Acetatifactor_sp011959105	K06131	18070	NODE_30_length_149858_cov_15_556724	None	cardiolipin synthase A/B [EC:2.7.8.-]
1211	Acetatifactor_sp011959105	Acetatifactor_sp011959105	K01893	18073	NODE_30_length_149858_cov_15_556724	None	asparaginyl-tRNA synthetase [EC:6.1.1.22]
1212	Acetatifactor_sp011959105	Acetatifactor_sp011959105	K01924	18008	NODE_30_length_149858_cov_15_556724	None	UDP-N-acetylmuramate--alanine ligase [EC:6.3.2.8]
1213	Acetatifactor_sp011959105	Acetatifactor_sp011959105	K22293	10798	NODE_38_length_136065_cov_13_341416	None	GntR family transcriptional regulator, rspAB operon transcriptional repressor
1214	Acetatifactor_sp011959105	Acetatifactor_sp011959105	K22293	18063	NODE_30_length_149858_cov_15_556724	None	GntR family transcriptional regulator, rspAB operon transcriptional repressor
1215	Acetatifactor_sp011959105	Acetatifactor_sp011959105	K03498	18077	NODE_30_length_149858_cov_15_556724	None	trk system potassium uptake protein
1216	Acetatifactor_sp011959105	Acetatifactor_sp011959105	K03523	18001	NODE_30_length_149858_cov_15_556724	None	biotin transport system substrate-specific component
1217	Acetatifactor_sp011959105	Acetatifactor_sp011959105	K01056	18012	NODE_30_length_149858_cov_15_556724	None	peptidyl-tRNA hydrolase, PTH1 family [EC:3.1.1.29]
1218	Acetatifactor_sp011959105	Acetatifactor_sp011959105	K03723	18013	NODE_30_length_149858_cov_15_556724	None	transcription-repair coupling factor (superfamily II helicase) [EC:3.6.4.-]
1219	Acetatifactor_sp011959105	Acetatifactor_sp011959105	K01870	18035	NODE_30_length_149858_cov_15_556724	None	isoleucyl-tRNA synthetase [EC:6.1.1.5]
1220	Acetatifactor_sp011959105	Acetatifactor_sp011959105	K09022	18079	NODE_30_length_149858_cov_15_556724	None	2-iminobutanoate/2-iminopropanoate deaminase [EC:3.5.99.10]
1221	Acetatifactor_sp011959105	Acetatifactor_sp011959105	K01126	18031	NODE_30_length_149858_cov_15_556724	None	glycerophosphoryl diester phosphodiesterase [EC:3.1.4.46]
1222	Acetatifactor_sp011959105	Acetatifactor_sp011959105	K22933	18075	NODE_30_length_149858_cov_15_556724	None	galacturan 1,4-alpha-galacturonidase [EC:3.2.1.67]
1223	Acetatifactor_sp011959105	Acetatifactor_sp011959105	K02823	18050	NODE_30_length_149858_cov_15_556724	None	dihydroorotate dehydrogenase electron transfer subunit
1224	Acetatifactor_sp011959105	Acetatifactor_sp011959105	K19055	18098	NODE_2776_length_9111_cov_12_449647	None	Ala-tRNA(Pro) deacylase [EC:3.1.1.-]
1225	Acetatifactor_sp011959105	Acetatifactor_sp011959105	K06412	18011	NODE_30_length_149858_cov_15_556724	None	stage V sporulation protein G
1226	Acetatifactor_sp011959105	Acetatifactor_sp011959105	K06187	39006	NODE_3029_length_8603_cov_15_888863	None	recombination protein RecR
1227	Acetatifactor_sp011959105	Acetatifactor_sp011959105	K03558	39010	NODE_3029_length_8603_cov_15_888863	None	membrane protein required for colicin V production
1228	Acetatifactor_sp011959105	Acetatifactor_sp011959105	K02343	39004	NODE_3029_length_8603_cov_15_888863	None	DNA polymerase III subunit gamma/tau [EC:2.7.7.7]
1229	Acetatifactor_sp011959105	Acetatifactor_sp011959105	K09747	39005	NODE_3029_length_8603_cov_15_888863	None	uncharacterized protein
1230	Acetatifactor_sp011959105	Acetatifactor_sp011959105	K00929	21727	NODE_2152_length_10921_cov_12_821185	None	butyrate kinase [EC:2.7.2.7]
1231	Acetatifactor_sp011959105	Acetatifactor_sp011959105	K02283	21678	NODE_204_length_65612_cov_16_144515	None	pilus assembly protein CpaF [EC:7.4.2.8]
1232	Acetatifactor_sp011959105	Acetatifactor_sp011959105	K01104	21734	NODE_2152_length_10921_cov_12_821185	None	protein-tyrosine phosphatase [EC:3.1.3.48]
1233	Acetatifactor_sp011959105	Acetatifactor_sp011959105	K09759	21716	NODE_204_length_65612_cov_16_144515	None	nondiscriminating aspartyl-tRNA synthetase [EC:6.1.1.23]
1234	Acetatifactor_sp011959105	Acetatifactor_sp011959105	K00634	21728	NODE_2152_length_10921_cov_12_821185	None	phosphate butyryltransferase [EC:2.3.1.19]
1235	Acetatifactor_sp011959105	Acetatifactor_sp011959105	K02199	21718	NODE_204_length_65612_cov_16_144515	None	cytochrome c biogenesis protein CcmG, thiol:disulfide interchange protein DsbE
1236	Acetatifactor_sp011959105	Acetatifactor_sp011959105	K06317	21680	NODE_204_length_65612_cov_16_144515	None	inhibitor of the pro-sigma K processing machinery
1237	Acetatifactor_sp011959105	Acetatifactor_sp011959105	K19225	21669	NODE_204_length_65612_cov_16_144515	None	rhomboid protease GluP [EC:3.4.21.105]
1238	Acetatifactor_sp011959105	Acetatifactor_sp011959105	K12510	21677	NODE_204_length_65612_cov_16_144515	None	tight adherence protein B
1239	Acetatifactor_sp011959105	Acetatifactor_sp011959105	K07727	21697	NODE_204_length_65612_cov_16_144515	None	putative transcriptional regulator
1240	Acetatifactor_sp011959105	Acetatifactor_sp011959105	K07727	13474	NODE_41_length_132337_cov_18_822122	None	putative transcriptional regulator
1241	Acetatifactor_sp011959105	Acetatifactor_sp011959105	K13747	21723	NODE_204_length_65612_cov_16_144515	None	carboxynorspermidine decarboxylase [EC:4.1.1.96]
1242	Acetatifactor_sp011959105	Acetatifactor_sp011959105	K02528	21690	NODE_204_length_65612_cov_16_144515	None	16S rRNA (adenine1518-N6/adenine1519-N6)-dimethyltransferase [EC:2.1.1.182]
1243	Acetatifactor_sp011959105	Acetatifactor_sp011959105	K02503	21667	NODE_204_length_65612_cov_16_144515	None	histidine triad (HIT) family protein
1244	Acetatifactor_sp011959105	Acetatifactor_sp011959105	K03424	21711	NODE_204_length_65612_cov_16_144515	None	TatD DNase family protein [EC:3.1.21.-]
1245	Acetatifactor_sp011959105	Acetatifactor_sp011959105	K07699	14492	NODE_827_length_23923_cov_13_399698	None	two-component system, response regulator, stage 0 sporulation protein A
1246	Acetatifactor_sp011959105	Acetatifactor_sp011959105	K07699	8325	NODE_132_length_82334_cov_15_986473	None	two-component system, response regulator, stage 0 sporulation protein A
1247	Acetatifactor_sp011959105	Acetatifactor_sp011959105	K00243	8322	NODE_132_length_82334_cov_15_986473	None	uncharacterized protein
1248	Acetatifactor_sp011959105	Acetatifactor_sp011959105	K19048	8239	NODE_320_length_49611_cov_17_172270	None	toxic protein SymE
1249	Acetatifactor_sp011959105	Acetatifactor_sp011959105	K11358	8291	NODE_132_length_82334_cov_15_986473	None	aspartate aminotransferase [EC:2.6.1.1]
1250	Acetatifactor_sp011959105	Acetatifactor_sp011959105	K21462	8320	NODE_132_length_82334_cov_15_986473	None	probable poly-beta-1,6-N-acetyl-D-glucosamine export protein
1251	Acetatifactor_sp011959105	Acetatifactor_sp011959105	K02687	8299	NODE_132_length_82334_cov_15_986473	None	ribosomal protein L11 methyltransferase [EC:2.1.1.-]
1252	Acetatifactor_sp011959105	Acetatifactor_sp011959105	K13013	8334	NODE_132_length_82334_cov_15_986473	None	O-antigen biosynthesis protein WbqV
1253	Acetatifactor_sp011959105	Acetatifactor_sp011959105	K06153	8292	NODE_132_length_82334_cov_15_986473	None	undecaprenyl-diphosphatase [EC:3.6.1.27]
1254	Acetatifactor_sp011959105	Acetatifactor_sp011959105	K13012	8329	NODE_132_length_82334_cov_15_986473	None	O-antigen biosynthesis protein WbqP
1255	Acetatifactor_sp011959105	Acetatifactor_sp011959105	K13012	8335	NODE_132_length_82334_cov_15_986473	None	O-antigen biosynthesis protein WbqP
1256	Acetatifactor_sp011959105	Acetatifactor_sp011959105	K00864	8290	NODE_132_length_82334_cov_15_986473	None	glycerol kinase [EC:2.7.1.30]
1257	Acetatifactor_sp011959105	Acetatifactor_sp011959105	K09761	8300	NODE_132_length_82334_cov_15_986473	None	16S rRNA (uracil1498-N3)-methyltransferase [EC:2.1.1.193]
1258	Acetatifactor_sp011959105	Acetatifactor_sp011959105	K12999	8324	NODE_132_length_82334_cov_15_986473	None	glucosyltransferase [EC:2.4.1.-]
1259	Acetatifactor_sp011959105	Acetatifactor_sp011959105	K06287	8273	NODE_320_length_49611_cov_17_172270	None	septum formation protein
1260	Acetatifactor_sp011959105	Acetatifactor_sp011959105	K04043	8296	NODE_132_length_82334_cov_15_986473	None	molecular chaperone DnaK
1261	Acetatifactor_sp011959105	Acetatifactor_sp011959105	K03705	8294	NODE_132_length_82334_cov_15_986473	None	heat-inducible transcriptional repressor
1262	Acetatifactor_sp011959105	Acetatifactor_sp011959105	K06923	8270	NODE_320_length_49611_cov_17_172270	None	uncharacterized protein
1263	Acetatifactor_sp011959105	Acetatifactor_sp011959105	K00567	8287	NODE_132_length_82334_cov_15_986473	None	methylated-DNA-[protein]-cysteine S-methyltransferase [EC:2.1.1.63]
1264	Acetatifactor_sp011959105	Acetatifactor_sp011959105	K03734	8266	NODE_320_length_49611_cov_17_172270	None	FAD:protein FMN transferase [EC:2.7.1.180]
1265	Acetatifactor_sp011959105	Acetatifactor_sp011959105	K01915	8314	NODE_132_length_82334_cov_15_986473	None	glutamine synthetase [EC:6.3.1.2]
1266	Acetatifactor_sp011959105	Acetatifactor_sp011959105	K01915	13411	NODE_41_length_132337_cov_18_822122	None	glutamine synthetase [EC:6.3.1.2]
1267	Acetatifactor_sp011959105	Acetatifactor_sp011959105	K01915	13407	NODE_41_length_132337_cov_18_822122	None	glutamine synthetase [EC:6.3.1.2]
1268	Acetatifactor_sp011959105	Acetatifactor_sp011959105	K01524	8271	NODE_320_length_49611_cov_17_172270	None	exopolyphosphatase / guanosine-5'-triphosphate,3'-diphosphate pyrophosphatase [EC:3.6.1.11 3.6.1.40]
1269	Acetatifactor_sp011959105	Acetatifactor_sp011959105	K18707	8305	NODE_132_length_82334_cov_15_986473	None	threonylcarbamoyladenosine tRNA methylthiotransferase MtaB [EC:2.8.4.5]
1270	Acetatifactor_sp011959105	Acetatifactor_sp011959105	K13684	8340	NODE_132_length_82334_cov_15_986473	None	putative colanic acid biosynthesis glycosyltransferase [EC:2.4.-.-]
1271	Acetatifactor_sp011959105	Acetatifactor_sp011959105	K12997	8341	NODE_132_length_82334_cov_15_986473	None	rhamnosyltransferase [EC:2.4.1.-]
1272	Acetatifactor_sp011959105	Acetatifactor_sp011959105	K16698	8328	NODE_132_length_82334_cov_15_986473	None	teichuronic acid biosynthesis glycosyltransferase TuaG [EC:2.4.-.-]
1273	Acetatifactor_sp011959105	Acetatifactor_sp011959105	K12574	8309	NODE_132_length_82334_cov_15_986473	None	ribonuclease J [EC:3.1.-.-]
1274	Acetatifactor_sp011959105	Acetatifactor_sp011959105	K03686	8297	NODE_132_length_82334_cov_15_986473	None	molecular chaperone DnaJ
1275	Acetatifactor_sp011959105	Acetatifactor_sp011959105	K19147	8252	NODE_320_length_49611_cov_17_172270	None	5-methylcytosine-specific restriction enzyme subunit McrC
1276	Acetatifactor_sp011959105	Acetatifactor_sp011959105	K03687	8295	NODE_132_length_82334_cov_15_986473	None	molecular chaperone GrpE
1277	Acetatifactor_sp011959105	Acetatifactor_sp011959105	K07082	8311	NODE_132_length_82334_cov_15_986473	None	UPF0755 protein
1278	Acetatifactor_sp011959105	Acetatifactor_sp011959105	K01154	8244	NODE_320_length_49611_cov_17_172270	None	type I restriction enzyme, S subunit [EC:3.1.21.3]
1279	Acetatifactor_sp011959105	Acetatifactor_sp011959105	K07452	8298	NODE_132_length_82334_cov_15_986473	None	5-methylcytosine-specific restriction enzyme B [EC:3.1.21.-]
1280	Acetatifactor_sp011959105	Acetatifactor_sp011959105	K00937	8272	NODE_320_length_49611_cov_17_172270	None	polyphosphate kinase [EC:2.7.4.1]
1281	Acetatifactor_sp011959105	Acetatifactor_sp011959105	K05873	8279	NODE_320_length_49611_cov_17_172270	None	adenylate cyclase, class 2 [EC:4.6.1.1]
1282	Acetatifactor_sp011959105	Acetatifactor_sp011959105	K07447	8307	NODE_132_length_82334_cov_15_986473	None	putative holliday junction resolvase [EC:3.1.-.-]
1283	Acetatifactor_sp011959105	Acetatifactor_sp011959105	K03427	8243	NODE_320_length_49611_cov_17_172270	None	type I restriction enzyme M protein [EC:2.1.1.72]
1284	Acetatifactor_sp011959105	Acetatifactor_sp011959105	K07053	8276	NODE_320_length_49611_cov_17_172270	None	3',5'-nucleoside bisphosphate phosphatase [EC:3.1.3.97]
1285	Acetatifactor_sp011959105	Acetatifactor_sp011959105	K01153	8245	NODE_320_length_49611_cov_17_172270	None	type I restriction enzyme, R subunit [EC:3.1.21.3]
1286	Acetatifactor_sp011959105	Acetatifactor_sp011959105	K07483	8249	NODE_320_length_49611_cov_17_172270	None	transposase
1287	Acetatifactor_sp011959105	Acetatifactor_sp011959105	K21600	29510	NODE_1643_length_13468_cov_13_897637	None	CsoR family transcriptional regulator, copper-sensing transcriptional repressor
1288	Acetatifactor_sp011959105	Acetatifactor_sp011959105	K07213	29511	NODE_1643_length_13468_cov_13_897637	None	copper chaperone
1289	Acetatifactor_sp011959105	Acetatifactor_sp011959105	K01533	29511	NODE_1643_length_13468_cov_13_897637	None	P-type Cu2+ transporter [EC:7.2.2.9]
1290	Acetatifactor_sp011959105	Acetatifactor_sp011959105	K16868	9427	NODE_21_length_173674_cov_16_583087	None	tellurite methyltransferase [EC:2.1.1.265]
1291	Acetatifactor_sp011959105	Acetatifactor_sp011959105	K16868	29518	NODE_1643_length_13468_cov_13_897637	None	tellurite methyltransferase [EC:2.1.1.265]
1292	Acetatifactor_sp011959105	Acetatifactor_sp011959105	K01183	29517	NODE_1643_length_13468_cov_13_897637	None	chitinase [EC:3.2.1.14]
1293	Acetatifactor_sp011959105	Acetatifactor_sp011959105	K17686	29511	NODE_1643_length_13468_cov_13_897637	None	P-type Cu+ transporter [EC:7.2.2.8]
1294	Acetatifactor_sp011959105	Acetatifactor_sp011959105	K18578	14465	NODE_15_length_192602_cov_15_584621	None	xyloglucan-specific exo-beta-1,4-glucanase [EC:3.2.1.155]
1295	Acetatifactor_sp011959105	Acetatifactor_sp011959105	K15897	14407	NODE_15_length_192602_cov_15_584621	None	UDP-2,4-diacetamido-2,4,6-trideoxy-beta-L-altropyranose hydrolase [EC:3.6.1.57]
1296	Acetatifactor_sp011959105	Acetatifactor_sp011959105	K03177	14504	NODE_827_length_23923_cov_13_399698	None	tRNA pseudouridine55 synthase [EC:5.4.99.25]
1297	Acetatifactor_sp011959105	Acetatifactor_sp011959105	K02519	14507	NODE_827_length_23923_cov_13_399698	None	translation initiation factor IF-2
1298	Acetatifactor_sp011959105	Acetatifactor_sp011959105	K06409	35489	NODE_493_length_36152_cov_12_277004	None	stage V sporulation protein B
1299	Acetatifactor_sp011959105	Acetatifactor_sp011959105	K06409	14490	NODE_827_length_23923_cov_13_399698	None	stage V sporulation protein B
1300	Acetatifactor_sp011959105	Acetatifactor_sp011959105	K02647	14403	NODE_15_length_192602_cov_15_584621	None	carbohydrate diacid regulator
1301	Acetatifactor_sp011959105	Acetatifactor_sp011959105	K15460	14480	NODE_15_length_192602_cov_15_584621	None	tRNA1Val (adenine37-N6)-methyltransferase [EC:2.1.1.223]
1302	Acetatifactor_sp011959105	Acetatifactor_sp011959105	K07448	14450	NODE_15_length_192602_cov_15_584621	None	restriction system protein
1303	Acetatifactor_sp011959105	Acetatifactor_sp011959105	K02242	14390	NODE_15_length_192602_cov_15_584621	None	competence protein ComFC
1304	Acetatifactor_sp011959105	Acetatifactor_sp011959105	K03606	14342	NODE_15_length_192602_cov_15_584621	None	putative colanic acid biosysnthesis UDP-glucose lipid carrier transferase
1305	Acetatifactor_sp011959105	Acetatifactor_sp011959105	K22719	14400	NODE_15_length_192602_cov_15_584621	None	murein hydrolase activator
1306	Acetatifactor_sp011959105	Acetatifactor_sp011959105	K09775	14382	NODE_15_length_192602_cov_15_584621	None	uncharacterized protein
1307	Acetatifactor_sp011959105	Acetatifactor_sp011959105	K00962	14499	NODE_827_length_23923_cov_13_399698	None	polyribonucleotide nucleotidyltransferase [EC:2.7.7.8]
1308	Acetatifactor_sp011959105	Acetatifactor_sp011959105	K01711	14435	NODE_15_length_192602_cov_15_584621	None	GDPmannose 4,6-dehydratase [EC:4.2.1.47]
1309	Acetatifactor_sp011959105	Acetatifactor_sp011959105	K02805	14379	NODE_15_length_192602_cov_15_584621	None	dTDP-4-amino-4,6-dideoxygalactose transaminase [EC:2.6.1.59]
1310	Acetatifactor_sp011959105	Acetatifactor_sp011959105	K02391	14394	NODE_15_length_192602_cov_15_584621	None	flagellar basal-body rod protein FlgF
1311	Acetatifactor_sp011959105	Acetatifactor_sp011959105	K03702	14398	NODE_15_length_192602_cov_15_584621	None	excinuclease ABC subunit B
1312	Acetatifactor_sp011959105	Acetatifactor_sp011959105	K00971	14431	NODE_15_length_192602_cov_15_584621	None	mannose-1-phosphate guanylyltransferase [EC:2.7.7.13]
1313	Acetatifactor_sp011959105	Acetatifactor_sp011959105	K20444	14344	NODE_15_length_192602_cov_15_584621	None	O-antigen biosynthesis protein [EC:2.4.1.-]
1314	Acetatifactor_sp011959105	Acetatifactor_sp011959105	K20444	14361	NODE_15_length_192602_cov_15_584621	None	O-antigen biosynthesis protein [EC:2.4.1.-]
1315	Acetatifactor_sp011959105	Acetatifactor_sp011959105	K20444	14362	NODE_15_length_192602_cov_15_584621	None	O-antigen biosynthesis protein [EC:2.4.1.-]
1316	Acetatifactor_sp011959105	Acetatifactor_sp011959105	K20444	9479	NODE_21_length_173674_cov_16_583087	None	O-antigen biosynthesis protein [EC:2.4.1.-]
1317	Acetatifactor_sp011959105	Acetatifactor_sp011959105	K02341	14482	NODE_15_length_192602_cov_15_584621	None	DNA polymerase III subunit delta' [EC:2.7.7.7]
1318	Acetatifactor_sp011959105	Acetatifactor_sp011959105	K09770	14483	NODE_15_length_192602_cov_15_584621	None	uncharacterized protein
1319	Acetatifactor_sp011959105	Acetatifactor_sp011959105	K09812	14402	NODE_15_length_192602_cov_15_584621	None	cell division transport system ATP-binding protein
1320	Acetatifactor_sp011959105	Acetatifactor_sp011959105	K01447	14444	NODE_15_length_192602_cov_15_584621	None	N-acetylmuramoyl-L-alanine amidase [EC:3.5.1.28]
1321	Acetatifactor_sp011959105	Acetatifactor_sp011959105	K06881	14505	NODE_827_length_23923_cov_13_399698	None	bifunctional oligoribonuclease and PAP phosphatase NrnA [EC:3.1.3.7 3.1.13.3]
1322	Acetatifactor_sp011959105	Acetatifactor_sp011959105	K06881	6297	NODE_157_length_74937_cov_20_326313	None	bifunctional oligoribonuclease and PAP phosphatase NrnA [EC:3.1.3.7 3.1.13.3]
1323	Acetatifactor_sp011959105	Acetatifactor_sp011959105	K06881	7303	NODE_207_length_65192_cov_17_114190	None	bifunctional oligoribonuclease and PAP phosphatase NrnA [EC:3.1.3.7 3.1.13.3]
1324	Acetatifactor_sp011959105	Acetatifactor_sp011959105	K20885	14470	NODE_15_length_192602_cov_15_584621	None	beta-1,2-mannobiose phosphorylase / 1,2-beta-oligomannan phosphorylase [EC:2.4.1.339 2.4.1.340]
1325	Acetatifactor_sp011959105	Acetatifactor_sp011959105	K09811	14401	NODE_15_length_192602_cov_15_584621	None	cell division transport system permease protein
1326	Acetatifactor_sp011959105	Acetatifactor_sp011959105	K18672	14386	NODE_15_length_192602_cov_15_584621	None	diadenylate cyclase [EC:2.7.7.85]
1327	Acetatifactor_sp011959105	Acetatifactor_sp011959105	K02834	14506	NODE_827_length_23923_cov_13_399698	None	ribosome-binding factor A
1328	Acetatifactor_sp011959105	Acetatifactor_sp011959105	K12992	14340	NODE_15_length_192602_cov_15_584621	None	rhamnosyltransferase [EC:2.4.1.-]
1329	Acetatifactor_sp011959105	Acetatifactor_sp011959105	K02956	14500	NODE_827_length_23923_cov_13_399698	None	small subunit ribosomal protein S15
1330	Acetatifactor_sp011959105	Acetatifactor_sp011959105	K23684	14425	NODE_15_length_192602_cov_15_584621	None	dolichol-phosphate hexosyltransferase [EC:2.4.1.-]
1331	Acetatifactor_sp011959105	Acetatifactor_sp011959105	K01779	14353	NODE_15_length_192602_cov_15_584621	None	aspartate racemase [EC:5.1.1.13]
1332	Acetatifactor_sp011959105	Acetatifactor_sp011959105	K03581	14391	NODE_15_length_192602_cov_15_584621	None	exodeoxyribonuclease V alpha subunit [EC:3.1.11.5]
1333	Acetatifactor_sp011959105	Acetatifactor_sp011959105	K06374	14455	NODE_15_length_192602_cov_15_584621	None	spore maturation protein B
1334	Acetatifactor_sp011959105	Acetatifactor_sp011959105	K07056	14479	NODE_15_length_192602_cov_15_584621	None	16S rRNA (cytidine1402-2'-O)-methyltransferase [EC:2.1.1.198]
1335	Acetatifactor_sp011959105	Acetatifactor_sp011959105	K03797	14399	NODE_15_length_192602_cov_15_584621	None	carboxyl-terminal processing protease [EC:3.4.21.102]
1336	Acetatifactor_sp011959105	Acetatifactor_sp011959105	K09693	14364	NODE_15_length_192602_cov_15_584621	None	teichoic acid transport system ATP-binding protein [EC:7.5.2.4]
1337	Acetatifactor_sp011959105	Acetatifactor_sp011959105	K15899	14412	NODE_15_length_192602_cov_15_584621	None	pseudaminic acid cytidylyltransferase [EC:2.7.7.81]
1338	Acetatifactor_sp011959105	Acetatifactor_sp011959105	K15898	14408	NODE_15_length_192602_cov_15_584621	None	pseudaminic acid synthase [EC:2.5.1.97]
1339	Acetatifactor_sp011959105	Acetatifactor_sp011959105	K09692	14365	NODE_15_length_192602_cov_15_584621	None	teichoic acid transport system permease protein
1340	Acetatifactor_sp011959105	Acetatifactor_sp011959105	K09690	14365	NODE_15_length_192602_cov_15_584621	None	lipopolysaccharide transport system permease protein
1341	Acetatifactor_sp011959105	Acetatifactor_sp011959105	K06373	14456	NODE_15_length_192602_cov_15_584621	None	spore maturation protein A
1342	Acetatifactor_sp011959105	Acetatifactor_sp011959105	K09691	14364	NODE_15_length_192602_cov_15_584621	None	lipopolysaccharide transport system ATP-binding protein
1343	Acetatifactor_sp011959105	Acetatifactor_sp011959105	K02454	1173	NODE_35_length_142391_cov_15_490389	None	general secretion pathway protein E [EC:7.4.2.8]
1344	Acetatifactor_sp011959105	Acetatifactor_sp011959105	K10907	1158	NODE_35_length_142391_cov_15_490389	None	aminotransferase [EC:2.6.1.-]
1345	Acetatifactor_sp011959105	Acetatifactor_sp011959105	K02654	1140	NODE_35_length_142391_cov_15_490389	None	leader peptidase (prepilin peptidase) / N-methyltransferase [EC:3.4.23.43 2.1.1.-]
1346	Acetatifactor_sp011959105	Acetatifactor_sp011959105	K15923	1249	NODE_1421_length_15289_cov_13_777865	None	alpha-L-fucosidase 2 [EC:3.2.1.51]
1347	Acetatifactor_sp011959105	Acetatifactor_sp011959105	K02056	1166	NODE_35_length_142391_cov_15_490389	None	simple sugar transport system ATP-binding protein [EC:7.5.2.-]
1348	Acetatifactor_sp011959105	Acetatifactor_sp011959105	K02653	1138	NODE_35_length_142391_cov_15_490389	None	type IV pilus assembly protein PilC
1349	Acetatifactor_sp011959105	Acetatifactor_sp011959105	K02652	1173	NODE_35_length_142391_cov_15_490389	None	type IV pilus assembly protein PilB
1350	Acetatifactor_sp011959105	Acetatifactor_sp011959105	K03216	1159	NODE_35_length_142391_cov_15_490389	None	tRNA (cytidine/uridine-2'-O-)-methyltransferase [EC:2.1.1.207]
1351	Acetatifactor_sp011959105	Acetatifactor_sp011959105	K18554	1178	NODE_35_length_142391_cov_15_490389	None	chloramphenicol 3-O phosphotransferase [EC:2.7.1.-]
1352	Acetatifactor_sp011959105	Acetatifactor_sp011959105	K04655	1156	NODE_35_length_142391_cov_15_490389	None	hydrogenase expression/formation protein HypE
1353	Acetatifactor_sp011959105	Acetatifactor_sp011959105	K02030	1210	NODE_35_length_142391_cov_15_490389	None	polar amino acid transport system substrate-binding protein
1354	Acetatifactor_sp011959105	Acetatifactor_sp011959105	K10009	1208	NODE_35_length_142391_cov_15_490389	None	L-cystine transport system permease protein
1355	Acetatifactor_sp011959105	Acetatifactor_sp011959105	K02424	1210	NODE_35_length_142391_cov_15_490389	None	L-cystine transport system substrate-binding protein
1356	Acetatifactor_sp011959105	Acetatifactor_sp011959105	K07010	1250	NODE_1421_length_15289_cov_13_777865	None	putative glutamine amidotransferase
1357	Acetatifactor_sp011959105	Acetatifactor_sp011959105	K03292	1197	NODE_35_length_142391_cov_15_490389	None	glycoside/pentoside/hexuronide:cation symporter, GPH family
1358	Acetatifactor_sp011959105	Acetatifactor_sp011959105	K02563	1231	NODE_35_length_142391_cov_15_490389	None	UDP-N-acetylglucosamine--N-acetylmuramyl-(pentapeptide) pyrophosphoryl-undecaprenol N-acetylglucosamine transferase [EC:2.4.1.227]
1359	Acetatifactor_sp011959105	Acetatifactor_sp011959105	K04104	1130	NODE_35_length_142391_cov_15_490389	None	acyl-CoA carboxylase subunit beta [EC:6.4.1.-]
1360	Acetatifactor_sp011959105	Acetatifactor_sp011959105	K01726	1159	NODE_35_length_142391_cov_15_490389	None	gamma-carbonic anhydrase [EC:4.2.1.-]
1361	Acetatifactor_sp011959105	Acetatifactor_sp011959105	K02028	1209	NODE_35_length_142391_cov_15_490389	None	polar amino acid transport system ATP-binding protein [EC:7.4.2.1]
1362	Acetatifactor_sp011959105	Acetatifactor_sp011959105	K02029	1208	NODE_35_length_142391_cov_15_490389	None	polar amino acid transport system permease protein
1363	Acetatifactor_sp011959105	Acetatifactor_sp011959105	K10820	1166	NODE_35_length_142391_cov_15_490389	None	galactofuranose transport system ATP-binding protein [EC:7.5.2.9]
1364	Acetatifactor_sp011959105	Acetatifactor_sp011959105	K02663	1141	NODE_35_length_142391_cov_15_490389	None	type IV pilus assembly protein PilN
1365	Acetatifactor_sp011959105	Acetatifactor_sp011959105	K02662	1141	NODE_35_length_142391_cov_15_490389	None	type IV pilus assembly protein PilM
1366	Acetatifactor_sp011959105	Acetatifactor_sp011959105	K00459	1125	NODE_35_length_142391_cov_15_490389	None	nitronate monooxygenase [EC:1.13.12.16]
1367	Acetatifactor_sp011959105	Acetatifactor_sp011959105	K07718	1161	NODE_35_length_142391_cov_15_490389	None	two-component system, sensor histidine kinase YesM [EC:2.7.13.3]
1368	Acetatifactor_sp011959105	Acetatifactor_sp011959105	K07718	13493	NODE_41_length_132337_cov_18_822122	None	two-component system, sensor histidine kinase YesM [EC:2.7.13.3]
1369	Acetatifactor_sp011959105	Acetatifactor_sp011959105	K07718	9591	NODE_234_length_60341_cov_12_095578	None	two-component system, sensor histidine kinase YesM [EC:2.7.13.3]
1370	Acetatifactor_sp011959105	Acetatifactor_sp011959105	K23876	1176	NODE_35_length_142391_cov_15_490389	None	(R)-2-hydroxyacyl-CoA dehydratese activating ATPase [EC:5.6.1.9]
1371	Acetatifactor_sp011959105	Acetatifactor_sp011959105	K07321	1182	NODE_35_length_142391_cov_15_490389	None	CO dehydrogenase maturation factor
1372	Acetatifactor_sp011959105	Acetatifactor_sp011959105	K01218	1216	NODE_35_length_142391_cov_15_490389	None	mannan endo-1,4-beta-mannosidase [EC:3.2.1.78]
1373	Acetatifactor_sp011959105	Acetatifactor_sp011959105	K07079	10738	NODE_38_length_136065_cov_13_341416	None	uncharacterized protein
1374	Acetatifactor_sp011959105	Acetatifactor_sp011959105	K07079	25803	NODE_185_length_69401_cov_11_534349	None	uncharacterized protein
1375	Acetatifactor_sp011959105	Acetatifactor_sp011959105	K07079	1150	NODE_35_length_142391_cov_15_490389	None	uncharacterized protein
1376	Acetatifactor_sp011959105	Acetatifactor_sp011959105	K03763	33283	NODE_240_length_59686_cov_12_128574	None	DNA polymerase III subunit alpha, Gram-positive type [EC:2.7.7.7]
1377	Acetatifactor_sp011959105	Acetatifactor_sp011959105	K03415	33252	NODE_240_length_59686_cov_12_128574	None	two-component system, chemotaxis family, chemotaxis protein CheV
1378	Acetatifactor_sp011959105	Acetatifactor_sp011959105	K02335	33286	NODE_240_length_59686_cov_12_128574	None	DNA polymerase I [EC:2.7.7.7]
1379	Acetatifactor_sp011959105	Acetatifactor_sp011959105	K05937	33275	NODE_240_length_59686_cov_12_128574	None	uncharacterized protein
1380	Acetatifactor_sp011959105	Acetatifactor_sp011959105	K05937	125	NODE_298_length_51759_cov_14_301466	None	uncharacterized protein
1381	Acetatifactor_sp011959105	Acetatifactor_sp011959105	K03438	26752	NODE_271_length_55077_cov_12_571444	None	16S rRNA (cytosine1402-N4)-methyltransferase [EC:2.1.1.199]
1382	Acetatifactor_sp011959105	Acetatifactor_sp011959105	K03438	33262	NODE_240_length_59686_cov_12_128574	None	16S rRNA (cytosine1402-N4)-methyltransferase [EC:2.1.1.199]
1383	Acetatifactor_sp011959105	Acetatifactor_sp011959105	K03648	33257	NODE_240_length_59686_cov_12_128574	None	uracil-DNA glycosylase [EC:3.2.2.27]
1384	Acetatifactor_sp011959105	Acetatifactor_sp011959105	K03465	33265	NODE_240_length_59686_cov_12_128574	None	thymidylate synthase (FAD) [EC:2.1.1.148]
1385	Acetatifactor_sp011959105	Acetatifactor_sp011959105	K07166	33290	NODE_240_length_59686_cov_12_128574	None	ACT domain-containing protein
1386	Acetatifactor_sp011959105	Acetatifactor_sp011959105	K01297	33260	NODE_240_length_59686_cov_12_128574	None	muramoyltetrapeptide carboxypeptidase [EC:3.4.17.13]
1387	Acetatifactor_sp011959105	Acetatifactor_sp011959105	K09157	33291	NODE_240_length_59686_cov_12_128574	None	uncharacterized protein
1388	Acetatifactor_sp011959105	Acetatifactor_sp011959105	K03590	33288	NODE_240_length_59686_cov_12_128574	None	cell division protein FtsA
1389	Acetatifactor_sp011959105	Acetatifactor_sp011959105	K00661	33277	NODE_240_length_59686_cov_12_128574	None	maltose O-acetyltransferase [EC:2.3.1.79]
1390	Acetatifactor_sp011959105	Acetatifactor_sp011959105	K06158	8277	NODE_320_length_49611_cov_17_172270	None	ATP-binding cassette, subfamily F, member 3
1391	Acetatifactor_sp011959105	Acetatifactor_sp011959105	K06158	33263	NODE_240_length_59686_cov_12_128574	None	ATP-binding cassette, subfamily F, member 3
1392	Acetatifactor_sp011959105	Acetatifactor_sp011959105	K07114	3309	NODE_567_length_31966_cov_18_153646	None	Ca-activated chloride channel homolog
1393	Acetatifactor_sp011959105	Acetatifactor_sp011959105	K07114	12039	NODE_905_length_22491_cov_12_879881	None	Ca-activated chloride channel homolog
1394	Acetatifactor_sp011959105	Acetatifactor_sp011959105	K01239	12055	NODE_304_length_51200_cov_16_892130	None	purine nucleosidase [EC:3.2.2.1]
1395	Acetatifactor_sp011959105	Acetatifactor_sp011959105	K22230	12068	NODE_304_length_51200_cov_16_892130	None	scyllo-inositol 2-dehydrogenase (NADP+) [EC:1.1.1.-]
1396	Acetatifactor_sp011959105	Acetatifactor_sp011959105	K03502	12040	NODE_905_length_22491_cov_12_879881	None	DNA polymerase V
1397	Acetatifactor_sp011959105	Acetatifactor_sp011959105	K16044	12069	NODE_304_length_51200_cov_16_892130	None	scyllo-inositol 2-dehydrogenase (NADP+) [EC:1.1.1.371]
1398	Acetatifactor_sp011959105	Acetatifactor_sp011959105	K09988	12061	NODE_304_length_51200_cov_16_892130	None	D-lyxose ketol-isomerase [EC:5.3.1.15]
1399	Acetatifactor_sp011959105	Acetatifactor_sp011959105	K01222	12056	NODE_304_length_51200_cov_16_892130	None	6-phospho-beta-glucosidase [EC:3.2.1.86]
1400	Acetatifactor_sp011959105	Acetatifactor_sp011959105	K00881	12064	NODE_304_length_51200_cov_16_892130	None	allose kinase [EC:2.7.1.55]
1401	Acetatifactor_sp011959105	Acetatifactor_sp011959105	K00852	12059	NODE_304_length_51200_cov_16_892130	None	ribokinase [EC:2.7.1.15]
1402	Acetatifactor_sp011959105	Acetatifactor_sp011959105	K02520	36328	NODE_213_length_64308_cov_13_756245	None	translation initiation factor IF-3
1403	Acetatifactor_sp011959105	Acetatifactor_sp011959105	K09927	36305	NODE_213_length_64308_cov_13_756245	None	uncharacterized protein
1404	Acetatifactor_sp011959105	Acetatifactor_sp011959105	K02916	36327	NODE_213_length_64308_cov_13_756245	None	large subunit ribosomal protein L35
1405	Acetatifactor_sp011959105	Acetatifactor_sp011959105	K01868	36330	NODE_213_length_64308_cov_13_756245	None	threonyl-tRNA synthetase [EC:6.1.1.3]
1406	Acetatifactor_sp011959105	Acetatifactor_sp011959105	K03695	36311	NODE_213_length_64308_cov_13_756245	None	ATP-dependent Clp protease ATP-binding subunit ClpB
1407	Acetatifactor_sp011959105	Acetatifactor_sp011959105	K00561	36304	NODE_213_length_64308_cov_13_756245	None	23S rRNA (adenine-N6)-dimethyltransferase [EC:2.1.1.184]
1408	Acetatifactor_sp011959105	Acetatifactor_sp011959105	K23242	36314	NODE_213_length_64308_cov_13_756245	None	manganese efflux pump family protein
1409	Acetatifactor_sp011959105	Acetatifactor_sp011959105	K02887	36326	NODE_213_length_64308_cov_13_756245	None	large subunit ribosomal protein L20
1410	Acetatifactor_sp011959105	Acetatifactor_sp011959105	K15532	36315	NODE_213_length_64308_cov_13_756245	None	unsaturated rhamnogalacturonyl hydrolase [EC:3.2.1.172]
1411	Acetatifactor_sp011959105	Acetatifactor_sp011959105	K07736	36339	NODE_213_length_64308_cov_13_756245	None	CarD family transcriptional regulator
1412	Acetatifactor_sp011959105	Acetatifactor_sp011959105	K04751	13406	NODE_41_length_132337_cov_18_822122	None	nitrogen regulatory protein P-II 1
1413	Acetatifactor_sp011959105	Acetatifactor_sp011959105	K01953	13405	NODE_41_length_132337_cov_18_822122	None	asparagine synthase (glutamine-hydrolysing) [EC:6.3.5.4]
1414	Acetatifactor_sp011959105	Acetatifactor_sp011959105	K15771	13467	NODE_41_length_132337_cov_18_822122	None	arabinogalactan oligomer / maltooligosaccharide transport system permease protein
1415	Acetatifactor_sp011959105	Acetatifactor_sp011959105	K15772	13468	NODE_41_length_132337_cov_18_822122	None	arabinogalactan oligomer / maltooligosaccharide transport system permease protein
1416	Acetatifactor_sp011959105	Acetatifactor_sp011959105	K22083	13409	NODE_41_length_132337_cov_18_822122	None	methylamine---glutamate N-methyltransferase subunit C [EC:2.1.1.21]
1417	Acetatifactor_sp011959105	Acetatifactor_sp011959105	K06867	19161	NODE_577_length_31628_cov_12_718145	None	uncharacterized protein
1418	Acetatifactor_sp011959105	Acetatifactor_sp011959105	K06867	10762	NODE_38_length_136065_cov_13_341416	None	uncharacterized protein
1419	Acetatifactor_sp011959105	Acetatifactor_sp011959105	K06867	70	NODE_61_length_118937_cov_14_458236	None	uncharacterized protein
1420	Acetatifactor_sp011959105	Acetatifactor_sp011959105	K06867	13415	NODE_41_length_132337_cov_18_822122	None	uncharacterized protein
1421	Acetatifactor_sp011959105	Acetatifactor_sp011959105	K18843	13490	NODE_41_length_132337_cov_18_822122	None	antitoxin HicB
1422	Acetatifactor_sp011959105	Acetatifactor_sp011959105	K05568	13486	NODE_41_length_132337_cov_18_822122	None	multicomponent Na+:H+ antiporter subunit D
1423	Acetatifactor_sp011959105	Acetatifactor_sp011959105	K05568	13487	NODE_41_length_132337_cov_18_822122	None	multicomponent Na+:H+ antiporter subunit D
1424	Acetatifactor_sp011959105	Acetatifactor_sp011959105	K20276	13502	NODE_41_length_132337_cov_18_822122	None	large repetitive protein
1425	Acetatifactor_sp011959105	Acetatifactor_sp011959105	K07025	20105	NODE_13_length_205171_cov_15_453119	None	putative hydrolase of the HAD superfamily
1426	Acetatifactor_sp011959105	Acetatifactor_sp011959105	K07025	30769	NODE_98_length_96321_cov_12_702356	None	putative hydrolase of the HAD superfamily
1427	Acetatifactor_sp011959105	Acetatifactor_sp011959105	K07025	33274	NODE_240_length_59686_cov_12_128574	None	putative hydrolase of the HAD superfamily
1428	Acetatifactor_sp011959105	Acetatifactor_sp011959105	K07025	13471	NODE_41_length_132337_cov_18_822122	None	putative hydrolase of the HAD superfamily
1429	Acetatifactor_sp011959105	Acetatifactor_sp011959105	K01534	13416	NODE_41_length_132337_cov_18_822122	None	Zn2+/Cd2+-exporting ATPase [EC:7.2.2.12 7.2.2.21]
1430	Acetatifactor_sp011959105	Acetatifactor_sp011959105	K06113	11	NODE_61_length_118937_cov_14_458236	None	arabinan endo-1,5-alpha-L-arabinosidase [EC:3.2.1.99]
1431	Acetatifactor_sp011959105	Acetatifactor_sp011959105	K06113	13477	NODE_41_length_132337_cov_18_822122	None	arabinan endo-1,5-alpha-L-arabinosidase [EC:3.2.1.99]
1432	Acetatifactor_sp011959105	Acetatifactor_sp011959105	K03320	13406	NODE_41_length_132337_cov_18_822122	None	ammonium transporter, Amt family
1433	Acetatifactor_sp011959105	Acetatifactor_sp011959105	K10716	13508	NODE_3771_length_7398_cov_15_746834	None	voltage-gated potassium channel
1434	Acetatifactor_sp011959105	Acetatifactor_sp011959105	K07443	13454	NODE_41_length_132337_cov_18_822122	None	methylated-DNA-protein-cysteine methyltransferase related protein
1435	Acetatifactor_sp011959105	Acetatifactor_sp011959105	K01185	13505	NODE_41_length_132337_cov_18_822122	None	lysozyme [EC:3.2.1.17]
1436	Acetatifactor_sp011959105	Acetatifactor_sp011959105	K08177	13476	NODE_41_length_132337_cov_18_822122	None	MFS transporter, OFA family, oxalate/formate antiporter
1437	Acetatifactor_sp011959105	Acetatifactor_sp011959105	K01187	13472	NODE_41_length_132337_cov_18_822122	None	alpha-glucosidase [EC:3.2.1.20]
1438	Acetatifactor_sp011959105	Acetatifactor_sp011959105	K01187	14468	NODE_15_length_192602_cov_15_584621	None	alpha-glucosidase [EC:3.2.1.20]
1439	Acetatifactor_sp011959105	Acetatifactor_sp011959105	K04757	59	NODE_61_length_118937_cov_14_458236	None	serine/threonine-protein kinase RsbW [EC:2.7.11.1]
1440	Acetatifactor_sp011959105	Acetatifactor_sp011959105	K03575	8	NODE_61_length_118937_cov_14_458236	None	A/G-specific adenine glycosylase [EC:3.2.2.31]
1441	Acetatifactor_sp011959105	Acetatifactor_sp011959105	K03429	72	NODE_61_length_118937_cov_14_458236	None	processive 1,2-diacylglycerol beta-glucosyltransferase [EC:2.4.1.315]
1442	Acetatifactor_sp011959105	Acetatifactor_sp011959105	K03429	32135	NODE_114_length_91042_cov_14_159297	None	processive 1,2-diacylglycerol beta-glucosyltransferase [EC:2.4.1.315]
1443	Acetatifactor_sp011959105	Acetatifactor_sp011959105	K11749	109	NODE_298_length_51759_cov_14_301466	None	regulator of sigma E protease [EC:3.4.24.-]
1444	Acetatifactor_sp011959105	Acetatifactor_sp011959105	K09936	24	NODE_61_length_118937_cov_14_458236	None	bacterial/archaeal transporter family-2 protein
1445	Acetatifactor_sp011959105	Acetatifactor_sp011959105	K06379	59	NODE_61_length_118937_cov_14_458236	None	stage II sporulation protein AB (anti-sigma F factor) [EC:2.7.11.1]
1446	Acetatifactor_sp011959105	Acetatifactor_sp011959105	K08974	49	NODE_61_length_118937_cov_14_458236	None	putative membrane protein
1447	Acetatifactor_sp011959105	Acetatifactor_sp011959105	K08483	119	NODE_298_length_51759_cov_14_301466	None	phosphoenolpyruvate-protein phosphotransferase (PTS system enzyme I) [EC:2.7.3.9]
1448	Acetatifactor_sp011959105	Acetatifactor_sp011959105	K02838	113	NODE_298_length_51759_cov_14_301466	None	ribosome recycling factor
1449	Acetatifactor_sp011959105	Acetatifactor_sp011959105	K02237	23	NODE_61_length_118937_cov_14_458236	None	competence protein ComEA
1450	Acetatifactor_sp011959105	Acetatifactor_sp011959105	K19005	37	NODE_61_length_118937_cov_14_458236	None	lipoteichoic acid synthase [EC:2.7.8.20]
1451	Acetatifactor_sp011959105	Acetatifactor_sp011959105	K01139	105	NODE_298_length_51759_cov_14_301466	None	GTP diphosphokinase / guanosine-3',5'-bis(diphosphate) 3'-diphosphatase [EC:2.7.6.5 3.1.7.2]
1452	Acetatifactor_sp011959105	Acetatifactor_sp011959105	K00806	112	NODE_298_length_51759_cov_14_301466	None	undecaprenyl diphosphate synthase [EC:2.5.1.31]
1453	Acetatifactor_sp011959105	Acetatifactor_sp011959105	K02340	13	NODE_61_length_118937_cov_14_458236	None	DNA polymerase III subunit delta [EC:2.7.7.7]
1454	Acetatifactor_sp011959105	Acetatifactor_sp011959105	K02238	19	NODE_61_length_118937_cov_14_458236	None	competence protein ComEC
1455	Acetatifactor_sp011959105	Acetatifactor_sp011959105	K00759	106	NODE_298_length_51759_cov_14_301466	None	adenine phosphoribosyltransferase [EC:2.4.2.7]
1456	Acetatifactor_sp011959105	Acetatifactor_sp011959105	K03091	58	NODE_61_length_118937_cov_14_458236	None	RNA polymerase sporulation-specific sigma factor
1457	Acetatifactor_sp011959105	Acetatifactor_sp011959105	K03091	26739	NODE_271_length_55077_cov_12_571444	None	RNA polymerase sporulation-specific sigma factor
1458	Acetatifactor_sp011959105	Acetatifactor_sp011959105	K03091	26742	NODE_271_length_55077_cov_12_571444	None	RNA polymerase sporulation-specific sigma factor
1459	Acetatifactor_sp011959105	Acetatifactor_sp011959105	K01069	104	NODE_298_length_51759_cov_14_301466	None	hydroxyacylglutathione hydrolase [EC:3.1.2.6]
1460	Acetatifactor_sp011959105	Acetatifactor_sp011959105	K06298	20	NODE_61_length_118937_cov_14_458236	None	germination protein M
1461	Acetatifactor_sp011959105	Acetatifactor_sp011959105	K01867	42	NODE_61_length_118937_cov_14_458236	None	tryptophanyl-tRNA synthetase [EC:6.1.1.2]
1462	Acetatifactor_sp011959105	Acetatifactor_sp011959105	K01873	64	NODE_61_length_118937_cov_14_458236	None	valyl-tRNA synthetase [EC:6.1.1.9]
1463	Acetatifactor_sp011959105	Acetatifactor_sp011959105	K01537	44	NODE_61_length_118937_cov_14_458236	None	P-type Ca2+ transporter type 2C [EC:7.2.2.10]
1464	Acetatifactor_sp011959105	Acetatifactor_sp011959105	K10844	73	NODE_61_length_118937_cov_14_458236	None	DNA excision repair protein ERCC-2 [EC:3.6.4.12]
1465	Acetatifactor_sp011959105	Acetatifactor_sp011959105	K00882	120	NODE_298_length_51759_cov_14_301466	None	1-phosphofructokinase [EC:2.7.1.56]
1466	Acetatifactor_sp011959105	Acetatifactor_sp011959105	K06405	52	NODE_61_length_118937_cov_14_458236	None	stage V sporulation protein AC
1467	Acetatifactor_sp011959105	Acetatifactor_sp011959105	K06404	53	NODE_61_length_118937_cov_14_458236	None	stage V sporulation protein AB
1468	Acetatifactor_sp011959105	Acetatifactor_sp011959105	K22405	28	NODE_61_length_118937_cov_14_458236	None	NADH oxidase (H2O-forming) [EC:1.6.3.4]
1469	Acetatifactor_sp011959105	Acetatifactor_sp011959105	K06406	40	NODE_61_length_118937_cov_14_458236	None	stage V sporulation protein AD
1470	Acetatifactor_sp011959105	Acetatifactor_sp011959105	K11392	43	NODE_61_length_118937_cov_14_458236	None	16S rRNA (cytosine1407-C5)-methyltransferase [EC:2.1.1.178]
1471	Acetatifactor_sp011959105	Acetatifactor_sp011959105	K06407	38	NODE_61_length_118937_cov_14_458236	None	stage V sporulation protein AE
1472	Acetatifactor_sp011959105	Acetatifactor_sp011959105	K06403	54	NODE_61_length_118937_cov_14_458236	None	stage V sporulation protein AA
1473	Acetatifactor_sp011959105	Acetatifactor_sp011959105	K08217	123	NODE_298_length_51759_cov_14_301466	None	MFS transporter, DHA3 family, macrolide efflux protein
1474	Acetatifactor_sp011959105	Acetatifactor_sp011959105	K08217	132	NODE_298_length_51759_cov_14_301466	None	MFS transporter, DHA3 family, macrolide efflux protein
1475	Acetatifactor_sp011959105	Acetatifactor_sp011959105	K06206	8	NODE_61_length_118937_cov_14_458236	None	sugar fermentation stimulation protein A
1476	Acetatifactor_sp011959105	Acetatifactor_sp011959105	K03627	65	NODE_61_length_118937_cov_14_458236	None	putative transcription factor
1477	Acetatifactor_sp011959105	Acetatifactor_sp011959105	K03602	7238	NODE_637_length_28929_cov_14_935721	None	exodeoxyribonuclease VII small subunit [EC:3.1.11.6]
1478	Acetatifactor_sp011959105	Acetatifactor_sp011959105	K06395	7229	NODE_637_length_28929_cov_14_935721	None	stage III sporulation protein AF
1479	Acetatifactor_sp011959105	Acetatifactor_sp011959105	K00096	7222	NODE_637_length_28929_cov_14_935721	None	glycerol-1-phosphate dehydrogenase [NAD(P)+] [EC:1.1.1.261]
1480	Acetatifactor_sp011959105	Acetatifactor_sp011959105	K06394	7228	NODE_637_length_28929_cov_14_935721	None	stage III sporulation protein AE
1481	Acetatifactor_sp011959105	Acetatifactor_sp011959105	K03601	7237	NODE_637_length_28929_cov_14_935721	None	exodeoxyribonuclease VII large subunit [EC:3.1.11.6]
1482	Acetatifactor_sp011959105	Acetatifactor_sp011959105	K06396	7230	NODE_637_length_28929_cov_14_935721	None	stage III sporulation protein AG
1483	Acetatifactor_sp011959105	Acetatifactor_sp011959105	K06397	7231	NODE_637_length_28929_cov_14_935721	None	stage III sporulation protein AH
1484	Acetatifactor_sp011959105	Acetatifactor_sp011959105	K03402	7243	NODE_637_length_28929_cov_14_935721	None	transcriptional regulator of arginine metabolism
1485	Acetatifactor_sp011959105	Acetatifactor_sp011959105	K06393	7227	NODE_637_length_28929_cov_14_935721	None	stage III sporulation protein AD
1486	Acetatifactor_sp011959105	Acetatifactor_sp011959105	K07729	19136	NODE_215_length_63614_cov_15_223509	None	putative transcriptional regulator
1487	Acetatifactor_sp011959105	Acetatifactor_sp011959105	K07729	7274	NODE_207_length_65192_cov_17_114190	None	putative transcriptional regulator
1488	Acetatifactor_sp011959105	Acetatifactor_sp011959105	K07729	34891	NODE_121_length_86585_cov_16_929389	None	putative transcriptional regulator
1489	Acetatifactor_sp011959105	Acetatifactor_sp011959105	K07729	23180	NODE_482_length_36746_cov_13_125835	None	putative transcriptional regulator
1490	Acetatifactor_sp011959105	Acetatifactor_sp011959105	K07729	31370	NODE_94_length_96797_cov_15_169771	None	putative transcriptional regulator
1491	Acetatifactor_sp011959105	Acetatifactor_sp011959105	K06392	7226	NODE_637_length_28929_cov_14_935721	None	stage III sporulation protein AC
1492	Acetatifactor_sp011959105	Acetatifactor_sp011959105	K06390	7224	NODE_637_length_28929_cov_14_935721	None	stage III sporulation protein AA
1493	Acetatifactor_sp011959105	Acetatifactor_sp011959105	K06391	7225	NODE_637_length_28929_cov_14_935721	None	stage III sporulation protein AB
1494	Acetatifactor_sp011959105	Acetatifactor_sp011959105	K00858	7242	NODE_637_length_28929_cov_14_935721	None	NAD+ kinase [EC:2.7.1.23]
1495	Acetatifactor_sp011959105	Acetatifactor_sp011959105	K06283	7279	NODE_207_length_65192_cov_17_114190	None	putative DeoR family transcriptional regulator, stage III sporulation protein D
1496	Acetatifactor_sp011959105	Acetatifactor_sp011959105	K02434	7310	NODE_207_length_65192_cov_17_114190	None	aspartyl-tRNA(Asn)/glutamyl-tRNA(Gln) amidotransferase subunit B [EC:6.3.5.6 6.3.5.7]
1497	Acetatifactor_sp011959105	Acetatifactor_sp011959105	K07149	7287	NODE_207_length_65192_cov_17_114190	None	uncharacterized protein
1498	Acetatifactor_sp011959105	Acetatifactor_sp011959105	K07171	10792	NODE_38_length_136065_cov_13_341416	None	mRNA interferase MazF [EC:3.1.-.-]
1499	Acetatifactor_sp011959105	Acetatifactor_sp011959105	K07171	7260	NODE_207_length_65192_cov_17_114190	None	mRNA interferase MazF [EC:3.1.-.-]
1500	Acetatifactor_sp011959105	Acetatifactor_sp011959105	K09766	7298	NODE_207_length_65192_cov_17_114190	None	uncharacterized protein
1501	Acetatifactor_sp011959105	Acetatifactor_sp011959105	K01886	7299	NODE_207_length_65192_cov_17_114190	None	glutaminyl-tRNA synthetase [EC:6.1.1.18]
1502	Acetatifactor_sp011959105	Acetatifactor_sp011959105	K01273	7290	NODE_207_length_65192_cov_17_114190	None	membrane dipeptidase [EC:3.4.13.19]
1503	Acetatifactor_sp011959105	Acetatifactor_sp011959105	K06442	7241	NODE_637_length_28929_cov_14_935721	None	23S rRNA (cytidine1920-2'-O)/16S rRNA (cytidine1409-2'-O)-methyltransferase [EC:2.1.1.226 2.1.1.227]
1504	Acetatifactor_sp011959105	Acetatifactor_sp011959105	K00375	7297	NODE_207_length_65192_cov_17_114190	None	GntR family transcriptional regulator / MocR family aminotransferase
1505	Acetatifactor_sp011959105	Acetatifactor_sp011959105	K22300	13500	NODE_41_length_132337_cov_18_822122	None	HTH-type transcriptional regulator, cell division transcriptional repressor
1506	Acetatifactor_sp011959105	Acetatifactor_sp011959105	K22300	7263	NODE_207_length_65192_cov_17_114190	None	HTH-type transcriptional regulator, cell division transcriptional repressor
1507	Acetatifactor_sp011959105	Acetatifactor_sp011959105	K02824	7291	NODE_207_length_65192_cov_17_114190	None	uracil permease
1508	Acetatifactor_sp011959105	Acetatifactor_sp011959105	K02837	7233	NODE_637_length_28929_cov_14_935721	None	peptide chain release factor 3
1509	Acetatifactor_sp011959105	Acetatifactor_sp011959105	K03631	7244	NODE_637_length_28929_cov_14_935721	None	DNA repair protein RecN (Recombination protein N)
1510	Acetatifactor_sp011959105	Acetatifactor_sp011959105	K03625	7236	NODE_637_length_28929_cov_14_935721	None	transcription antitermination protein NusB
1511	Acetatifactor_sp011959105	Acetatifactor_sp011959105	K18986	7272	NODE_207_length_65192_cov_17_114190	None	two-component system, OmpR family, sensor kinase Ihk [EC:2.7.13.3]
1512	Acetatifactor_sp011959105	Acetatifactor_sp011959105	K06399	7245	NODE_637_length_28929_cov_14_935721	None	stage IV sporulation protein B [EC:3.4.21.116]
1513	Acetatifactor_sp011959105	Acetatifactor_sp011959105	K01839	7232	NODE_637_length_28929_cov_14_935721	None	phosphopentomutase [EC:5.4.2.7]
1514	Acetatifactor_sp011959105	Acetatifactor_sp011959105	K06949	26756	NODE_271_length_55077_cov_12_571444	None	ribosome biogenesis GTPase / thiamine phosphate phosphatase [EC:3.6.1.- 3.1.3.100]
1515	Acetatifactor_sp011959105	Acetatifactor_sp011959105	K08384	26749	NODE_271_length_55077_cov_12_571444	None	stage V sporulation protein D (sporulation-specific penicillin-binding protein)
1516	Acetatifactor_sp011959105	Acetatifactor_sp011959105	K02051	26778	NODE_271_length_55077_cov_12_571444	None	NitT/TauT family transport system substrate-binding protein
1517	Acetatifactor_sp011959105	Acetatifactor_sp011959105	K02051	19173	NODE_577_length_31628_cov_12_718145	None	NitT/TauT family transport system substrate-binding protein
1518	Acetatifactor_sp011959105	Acetatifactor_sp011959105	K03588	26747	NODE_271_length_55077_cov_12_571444	None	cell division protein FtsW
1519	Acetatifactor_sp011959105	Acetatifactor_sp011959105	K03589	26745	NODE_271_length_55077_cov_12_571444	None	cell division protein FtsQ
1520	Acetatifactor_sp011959105	Acetatifactor_sp011959105	K06383	26743	NODE_271_length_55077_cov_12_571444	None	stage II sporulation protein GA (sporulation sigma-E factor processing peptidase) [EC:3.4.23.-]
1521	Acetatifactor_sp011959105	Acetatifactor_sp011959105	K06973	26761	NODE_271_length_55077_cov_12_571444	None	uncharacterized protein
1522	Acetatifactor_sp011959105	Acetatifactor_sp011959105	K07462	26766	NODE_271_length_55077_cov_12_571444	None	single-stranded-DNA-specific exonuclease [EC:3.1.-.-]
1523	Acetatifactor_sp011959105	Acetatifactor_sp011959105	K12132	107	NODE_298_length_51759_cov_14_301466	None	eukaryotic-like serine/threonine-protein kinase [EC:2.7.11.1]
1524	Acetatifactor_sp011959105	Acetatifactor_sp011959105	K12132	26757	NODE_271_length_55077_cov_12_571444	None	eukaryotic-like serine/threonine-protein kinase [EC:2.7.11.1]
1525	Acetatifactor_sp011959105	Acetatifactor_sp011959105	K03215	26772	NODE_271_length_55077_cov_12_571444	None	23S rRNA (uracil1939-C5)-methyltransferase [EC:2.1.1.190]
1526	Acetatifactor_sp011959105	Acetatifactor_sp011959105	K03500	26760	NODE_271_length_55077_cov_12_571444	None	16S rRNA (cytosine967-C5)-methyltransferase [EC:2.1.1.176]
1527	Acetatifactor_sp011959105	Acetatifactor_sp011959105	K03925	26753	NODE_271_length_55077_cov_12_571444	None	MraZ protein
1528	Acetatifactor_sp011959105	Acetatifactor_sp011959105	K01925	26748	NODE_271_length_55077_cov_12_571444	None	UDP-N-acetylmuramoylalanine--D-glutamate ligase [EC:6.3.2.9]
1529	Acetatifactor_sp011959105	Acetatifactor_sp011959105	K01462	26763	NODE_271_length_55077_cov_12_571444	None	peptide deformylase [EC:3.5.1.88]
1530	Acetatifactor_sp011959105	Acetatifactor_sp011959105	K04066	26764	NODE_271_length_55077_cov_12_571444	None	primosomal protein N' (replication factor Y) (superfamily II helicase) [EC:3.6.4.-]
1531	Acetatifactor_sp011959105	Acetatifactor_sp011959105	K00604	26762	NODE_271_length_55077_cov_12_571444	None	methionyl-tRNA formyltransferase [EC:2.1.2.9]
1532	Acetatifactor_sp011959105	Acetatifactor_sp011959105	K03657	10813	NODE_38_length_136065_cov_13_341416	None	DNA helicase II / ATP-dependent DNA helicase PcrA [EC:3.6.4.12]
1533	Acetatifactor_sp011959105	Acetatifactor_sp011959105	K03657	26774	NODE_271_length_55077_cov_12_571444	None	DNA helicase II / ATP-dependent DNA helicase PcrA [EC:3.6.4.12]
1534	Acetatifactor_sp011959105	Acetatifactor_sp011959105	K03657	38094	NODE_180_length_70124_cov_13_959511	None	DNA helicase II / ATP-dependent DNA helicase PcrA [EC:3.6.4.12]
1535	Acetatifactor_sp011959105	Acetatifactor_sp011959105	K01928	26765	NODE_271_length_55077_cov_12_571444	None	UDP-N-acetylmuramoyl-L-alanyl-D-glutamate--2,6-diaminopimelate ligase [EC:6.3.2.13]
1536	Acetatifactor_sp011959105	Acetatifactor_sp011959105	K20074	26758	NODE_271_length_55077_cov_12_571444	None	PPM family protein phosphatase [EC:3.1.3.16]
1537	Acetatifactor_sp011959105	Acetatifactor_sp011959105	K03531	26744	NODE_271_length_55077_cov_12_571444	None	cell division protein FtsZ
1538	Acetatifactor_sp011959105	Acetatifactor_sp011959105	K13292	26754	NODE_271_length_55077_cov_12_571444	None	phosphatidylglycerol---prolipoprotein diacylglyceryl transferase [EC:2.5.1.145]
1539	Acetatifactor_sp011959105	Acetatifactor_sp011959105	K06941	26759	NODE_271_length_55077_cov_12_571444	None	23S rRNA (adenine2503-C2)-methyltransferase [EC:2.1.1.192]
1540	Acetatifactor_sp011959105	Acetatifactor_sp011959105	K06942	26755	NODE_271_length_55077_cov_12_571444	None	ribosome-binding ATPase
1541	Acetatifactor_sp011959105	Acetatifactor_sp011959105	K03587	26749	NODE_271_length_55077_cov_12_571444	None	cell division protein FtsI (penicillin-binding protein 3) [EC:3.4.16.4]
1542	Acetatifactor_sp011959105	Acetatifactor_sp011959105	K01887	34190	NODE_368_length_45170_cov_13_660911	None	arginyl-tRNA synthetase [EC:6.1.1.19]
1543	Acetatifactor_sp011959105	Acetatifactor_sp011959105	K09765	34191	NODE_368_length_45170_cov_13_660911	None	epoxyqueuosine reductase [EC:1.17.99.6]
1544	Acetatifactor_sp011959105	Acetatifactor_sp011959105	K07493	34223	NODE_368_length_45170_cov_13_660911	None	putative transposase
1545	Acetatifactor_sp011959105	Acetatifactor_sp011959105	K04564	34192	NODE_368_length_45170_cov_13_660911	None	superoxide dismutase, Fe-Mn family [EC:1.15.1.1]
1546	Acetatifactor_sp011959105	Acetatifactor_sp011959105	K06987	34212	NODE_368_length_45170_cov_13_660911	None	uncharacterized protein
1547	Acetatifactor_sp011959105	Acetatifactor_sp011959105	K06987	34213	NODE_368_length_45170_cov_13_660911	None	uncharacterized protein
1548	Acetatifactor_sp011959105	Acetatifactor_sp011959105	K06182	10757	NODE_38_length_136065_cov_13_341416	None	23S rRNA pseudouridine2604 synthase [EC:5.4.99.21]
1549	Acetatifactor_sp011959105	Acetatifactor_sp011959105	K03210	10805	NODE_38_length_136065_cov_13_341416	None	preprotein translocase subunit YajC
1550	Acetatifactor_sp011959105	Acetatifactor_sp011959105	K02241	10747	NODE_38_length_136065_cov_13_341416	None	competence protein ComFB
1551	Acetatifactor_sp011959105	Acetatifactor_sp011959105	K03410	10698	NODE_38_length_136065_cov_13_341416	None	chemotaxis protein CheC
1552	Acetatifactor_sp011959105	Acetatifactor_sp011959105	K02557	32137	NODE_114_length_91042_cov_14_159297	None	chemotaxis protein MotB
1553	Acetatifactor_sp011959105	Acetatifactor_sp011959105	K02557	10715	NODE_38_length_136065_cov_13_341416	None	chemotaxis protein MotB
1554	Acetatifactor_sp011959105	Acetatifactor_sp011959105	K02387	10730	NODE_38_length_136065_cov_13_341416	None	flagellar basal-body rod protein FlgB
1555	Acetatifactor_sp011959105	Acetatifactor_sp011959105	K06334	10823	NODE_38_length_136065_cov_13_341416	None	spore coat protein JC
1556	Acetatifactor_sp011959105	Acetatifactor_sp011959105	K01507	10820	NODE_38_length_136065_cov_13_341416	None	inorganic pyrophosphatase [EC:3.6.1.1]
1557	Acetatifactor_sp011959105	Acetatifactor_sp011959105	K02556	10716	NODE_38_length_136065_cov_13_341416	None	chemotaxis protein MotA
1558	Acetatifactor_sp011959105	Acetatifactor_sp011959105	K23997	10794	NODE_38_length_136065_cov_13_341416	None	ADP-dependent NAD(P)H-hydrate dehydratase / NAD(P)H-hydrate epimerase [EC:4.2.1.136 5.1.99.6]
1559	Acetatifactor_sp011959105	Acetatifactor_sp011959105	K02385	10717	NODE_38_length_136065_cov_13_341416	None	flagellar protein FlbD
1560	Acetatifactor_sp011959105	Acetatifactor_sp011959105	K02420	10708	NODE_38_length_136065_cov_13_341416	None	flagellar biosynthesis protein FliQ
1561	Acetatifactor_sp011959105	Acetatifactor_sp011959105	K02408	10728	NODE_38_length_136065_cov_13_341416	None	flagellar hook-basal body complex protein FliE
1562	Acetatifactor_sp011959105	Acetatifactor_sp011959105	K02409	10727	NODE_38_length_136065_cov_13_341416	None	flagellar M-ring protein FliF
1563	Acetatifactor_sp011959105	Acetatifactor_sp011959105	K02421	10707	NODE_38_length_136065_cov_13_341416	None	flagellar biosynthesis protein FliR
1564	Acetatifactor_sp011959105	Acetatifactor_sp011959105	K02390	10718	NODE_38_length_136065_cov_13_341416	None	flagellar hook protein FlgE
1565	Acetatifactor_sp011959105	Acetatifactor_sp011959105	K07001	10739	NODE_38_length_136065_cov_13_341416	None	NTE family protein
1566	Acetatifactor_sp011959105	Acetatifactor_sp011959105	K19824	10825	NODE_2616_length_9507_cov_15_352518	None	rubrerythrin
1567	Acetatifactor_sp011959105	Acetatifactor_sp011959105	K06333	10822	NODE_38_length_136065_cov_13_341416	None	spore coat protein JB
1568	Acetatifactor_sp011959105	Acetatifactor_sp011959105	K02419	10709	NODE_38_length_136065_cov_13_341416	None	flagellar biosynthesis protein FliP
1569	Acetatifactor_sp011959105	Acetatifactor_sp011959105	K03706	10731	NODE_38_length_136065_cov_13_341416	None	transcriptional pleiotropic repressor
1570	Acetatifactor_sp011959105	Acetatifactor_sp011959105	K02418	10710	NODE_38_length_136065_cov_13_341416	None	flagellar protein FliO/FliZ
1571	Acetatifactor_sp011959105	Acetatifactor_sp011959105	K01926	10796	NODE_38_length_136065_cov_13_341416	None	redox-sensing transcriptional repressor
1572	Acetatifactor_sp011959105	Acetatifactor_sp011959105	K03466	10786	NODE_38_length_136065_cov_13_341416	None	DNA segregation ATPase FtsK/SpoIIIE, S-DNA-T family
1573	Acetatifactor_sp011959105	Acetatifactor_sp011959105	K02383	10722	NODE_38_length_136065_cov_13_341416	None	flagellar protein FlbB
1574	Acetatifactor_sp011959105	Acetatifactor_sp011959105	K17758	10794	NODE_38_length_136065_cov_13_341416	None	ADP-dependent NAD(P)H-hydrate dehydratase [EC:4.2.1.136]
1575	Acetatifactor_sp011959105	Acetatifactor_sp011959105	K00783	10779	NODE_38_length_136065_cov_13_341416	None	23S rRNA (pseudouridine1915-N3)-methyltransferase [EC:2.1.1.177]
1576	Acetatifactor_sp011959105	Acetatifactor_sp011959105	K02416	10713	NODE_38_length_136065_cov_13_341416	None	flagellar motor switch protein FliM
1577	Acetatifactor_sp011959105	Acetatifactor_sp011959105	K02417	10712	NODE_38_length_136065_cov_13_341416	None	flagellar motor switch protein FliN
1578	Acetatifactor_sp011959105	Acetatifactor_sp011959105	K03469	10758	NODE_38_length_136065_cov_13_341416	None	ribonuclease HI [EC:3.1.26.4]
1579	Acetatifactor_sp011959105	Acetatifactor_sp011959105	K02401	10706	NODE_38_length_136065_cov_13_341416	None	flagellar biosynthesis protein FlhB
1580	Acetatifactor_sp011959105	Acetatifactor_sp011959105	K02415	10714	NODE_38_length_136065_cov_13_341416	None	flagellar protein FliL
1581	Acetatifactor_sp011959105	Acetatifactor_sp011959105	K02414	10721	NODE_38_length_136065_cov_13_341416	None	flagellar hook-length control protein FliK
1582	Acetatifactor_sp011959105	Acetatifactor_sp011959105	K02400	10705	NODE_38_length_136065_cov_13_341416	None	flagellar biosynthesis protein FlhA
1583	Acetatifactor_sp011959105	Acetatifactor_sp011959105	K00773	10806	NODE_38_length_136065_cov_13_341416	None	queuine tRNA-ribosyltransferase [EC:2.4.2.29]
1584	Acetatifactor_sp011959105	Acetatifactor_sp011959105	K00763	10734	NODE_38_length_136065_cov_13_341416	None	nicotinate phosphoribosyltransferase [EC:6.3.4.21]
1585	Acetatifactor_sp011959105	Acetatifactor_sp011959105	K02389	10720	NODE_38_length_136065_cov_13_341416	None	flagellar basal-body rod modification protein FlgD
1586	Acetatifactor_sp011959105	Acetatifactor_sp011959105	K02404	10704	NODE_38_length_136065_cov_13_341416	None	flagellar biosynthesis protein FlhF
1587	Acetatifactor_sp011959105	Acetatifactor_sp011959105	K02410	10726	NODE_38_length_136065_cov_13_341416	None	flagellar motor switch protein FliG
1588	Acetatifactor_sp011959105	Acetatifactor_sp011959105	K02411	10725	NODE_38_length_136065_cov_13_341416	None	flagellar assembly protein FliH
1589	Acetatifactor_sp011959105	Acetatifactor_sp011959105	K02388	10729	NODE_38_length_136065_cov_13_341416	None	flagellar basal-body rod protein FlgC
1590	Acetatifactor_sp011959105	Acetatifactor_sp011959105	K02413	10723	NODE_38_length_136065_cov_13_341416	None	flagellar protein FliJ
1591	Acetatifactor_sp011959105	Acetatifactor_sp011959105	K02412	10724	NODE_38_length_136065_cov_13_341416	None	flagellum-specific ATP synthase [EC:7.4.2.8]
1592	Acetatifactor_sp011959105	Acetatifactor_sp011959105	K18189	10790	NODE_38_length_136065_cov_13_341416	None	translational activator of cytochrome c oxidase 1
1593	Acetatifactor_sp011959105	Acetatifactor_sp011959105	K04562	10703	NODE_38_length_136065_cov_13_341416	None	flagellar biosynthesis protein FlhG
1594	Acetatifactor_sp011959105	Acetatifactor_sp011959105	K01972	10756	NODE_38_length_136065_cov_13_341416	None	DNA ligase (NAD+) [EC:6.5.1.2]
1595	Acetatifactor_sp011959105	Acetatifactor_sp011959105	K03168	10732	NODE_38_length_136065_cov_13_341416	None	DNA topoisomerase I [EC:5.6.2.1]
1596	Acetatifactor_sp011959105	Acetatifactor_sp011959105	K00266	10781	NODE_38_length_136065_cov_13_341416	None	glutamate synthase (NADPH) small chain [EC:1.4.1.13]
1597	Acetatifactor_sp011959105	Acetatifactor_sp011959105	K06993	10758	NODE_38_length_136065_cov_13_341416	None	ribonuclease H-related protein
1598	Acetatifactor_sp011959105	Acetatifactor_sp011959105	K13005	7	NODE_61_length_118937_cov_14_458236	None	abequosyltransferase [EC:2.4.1.60]
1599	Acetatifactor_sp011959105	Acetatifactor_sp011959105	K22441	31	NODE_61_length_118937_cov_14_458236	None	diamine N-acetyltransferase [EC:2.3.1.57]
1600	Acetatifactor_sp011959105	Acetatifactor_sp011959105	K06378	60	NODE_61_length_118937_cov_14_458236	None	stage II sporulation protein AA (anti-sigma F factor antagonist)
1601	Acetatifactor_sp011959105	Acetatifactor_sp011959105	K03707	152	NODE_298_length_51759_cov_14_301466	None	thiaminase (transcriptional activator TenA) [EC:3.5.99.2]
1602	Acetatifactor_sp011959105	Acetatifactor_sp011959105	K02650	1139	NODE_35_length_142391_cov_15_490389	None	type IV pilus assembly protein PilA
1603	Acetatifactor_sp011959105	Acetatifactor_sp011959105	K02103	1164	NODE_35_length_142391_cov_15_490389	None	GntR family transcriptional regulator, arabinose operon transcriptional repressor
1604	Acetatifactor_sp011959105	Acetatifactor_sp011959105	K23509	1167	NODE_35_length_142391_cov_15_490389	None	galactofuranose transport system permease protein
1605	Acetatifactor_sp011959105	Acetatifactor_sp011959105	K10804	19135	NODE_215_length_63614_cov_15_223509	None	acyl-CoA thioesterase I [EC:3.1.2.- 3.1.2.2 3.1.1.2 3.1.1.5]
1606	Acetatifactor_sp011959105	Acetatifactor_sp011959105	K10804	15588	NODE_164_length_73312_cov_12_071474	None	acyl-CoA thioesterase I [EC:3.1.2.- 3.1.2.2 3.1.1.2 3.1.1.5]
1607	Acetatifactor_sp011959105	Acetatifactor_sp011959105	K10804	1215	NODE_35_length_142391_cov_15_490389	None	acyl-CoA thioesterase I [EC:3.1.2.- 3.1.2.2 3.1.1.2 3.1.1.5]
1608	Acetatifactor_sp011959105	Acetatifactor_sp011959105	K04477	2294	NODE_302_length_51364_cov_13_428170	None	putative hydrolase
1609	Acetatifactor_sp011959105	Acetatifactor_sp011959105	K13283	5319	NODE_1317_length_16298_cov_13_782614	None	ferrous-iron efflux pump FieF
1610	Acetatifactor_sp011959105	Acetatifactor_sp011959105	K01286	6233	NODE_167_length_73020_cov_15_007798	None	D-alanyl-D-alanine carboxypeptidase [EC:3.4.16.4]
1611	Acetatifactor_sp011959105	Acetatifactor_sp011959105	K04095	6245	NODE_167_length_73020_cov_15_007798	None	cell filamentation protein
1612	Acetatifactor_sp011959105	Acetatifactor_sp011959105	K05833	28530	NODE_130_length_83251_cov_13_260974	None	putative tryptophan/tyrosine transport system ATP-binding protein
1613	Acetatifactor_sp011959105	Acetatifactor_sp011959105	K05833	18084	NODE_30_length_149858_cov_15_556724	None	putative tryptophan/tyrosine transport system ATP-binding protein
1614	Acetatifactor_sp011959105	Acetatifactor_sp011959105	K05833	6247	NODE_167_length_73020_cov_15_007798	None	putative tryptophan/tyrosine transport system ATP-binding protein
1615	Acetatifactor_sp011959105	Acetatifactor_sp011959105	K05343	7285	NODE_207_length_65192_cov_17_114190	None	maltose alpha-D-glucosyltransferase / alpha-amylase [EC:5.4.99.16 3.2.1.1]
1616	Acetatifactor_sp011959105	Acetatifactor_sp011959105	K01101	7288	NODE_207_length_65192_cov_17_114190	None	4-nitrophenyl phosphatase [EC:3.1.3.41]
1617	Acetatifactor_sp011959105	Acetatifactor_sp011959105	K10117	7300	NODE_207_length_65192_cov_17_114190	None	raffinose/stachyose/melibiose transport system substrate-binding protein
1618	Acetatifactor_sp011959105	Acetatifactor_sp011959105	K07068	8275	NODE_320_length_49611_cov_17_172270	None	uncharacterized protein
1619	Acetatifactor_sp011959105	Acetatifactor_sp011959105	K13002	8337	NODE_132_length_82334_cov_15_986473	None	glycosyltransferase [EC:2.4.1.-]
1620	Acetatifactor_sp011959105	Acetatifactor_sp011959105	K06221	8347	NODE_132_length_82334_cov_15_986473	None	2,5-diketo-D-gluconate reductase A [EC:1.1.1.346]
1621	Acetatifactor_sp011959105	Acetatifactor_sp011959105	K17733	9391	NODE_21_length_173674_cov_16_583087	None	peptidoglycan LD-endopeptidase CwlK [EC:3.4.-.-]
1622	Acetatifactor_sp011959105	Acetatifactor_sp011959105	K13010	9422	NODE_21_length_173674_cov_16_583087	None	perosamine synthetase [EC:2.6.1.102]
1623	Acetatifactor_sp011959105	Acetatifactor_sp011959105	K21210	9423	NODE_21_length_173674_cov_16_583087	None	NDP-mannose synthase
1624	Acetatifactor_sp011959105	Acetatifactor_sp011959105	K20391	9484	NODE_21_length_173674_cov_16_583087	None	HTH-type transcriptional regulator, pleiotropic regulator of extracellular virulence genes
1625	Acetatifactor_sp011959105	Acetatifactor_sp011959105	K02244	9521	NODE_21_length_173674_cov_16_583087	None	competence protein ComGB
1626	Acetatifactor_sp011959105	Acetatifactor_sp011959105	K03709	9576	NODE_234_length_60341_cov_12_095578	None	DtxR family transcriptional regulator, Mn-dependent transcriptional regulator
1627	Acetatifactor_sp011959105	Acetatifactor_sp011959105	K08281	10735	NODE_38_length_136065_cov_13_341416	None	nicotinamidase/pyrazinamidase [EC:3.5.1.19 3.5.1.-]
1628	Acetatifactor_sp011959105	Acetatifactor_sp011959105	K03315	10766	NODE_38_length_136065_cov_13_341416	None	Na+:H+ antiporter, NhaC family
1629	Acetatifactor_sp011959105	Acetatifactor_sp011959105	K17734	10801	NODE_38_length_136065_cov_13_341416	None	serine protease AprX [EC:3.4.21.-]
1630	Acetatifactor_sp011959105	Acetatifactor_sp011959105	K01208	12043	NODE_304_length_51200_cov_16_892130	None	cyclomaltodextrinase / maltogenic alpha-amylase / neopullulanase [EC:3.2.1.54 3.2.1.133 3.2.1.135]
1631	Acetatifactor_sp011959105	Acetatifactor_sp011959105	K17880	13457	NODE_41_length_132337_cov_18_822122	None	hygromycin-B 7''-O-kinase [EC:2.7.1.119]
1632	Acetatifactor_sp011959105	Acetatifactor_sp011959105	K05569	13479	NODE_41_length_132337_cov_18_822122	None	multicomponent Na+:H+ antiporter subunit E
1633	Acetatifactor_sp011959105	Acetatifactor_sp011959105	K05570	13480	NODE_41_length_132337_cov_18_822122	None	multicomponent Na+:H+ antiporter subunit F
1634	Acetatifactor_sp011959105	Acetatifactor_sp011959105	K05571	13481	NODE_41_length_132337_cov_18_822122	None	multicomponent Na+:H+ antiporter subunit G
1635	Acetatifactor_sp011959105	Acetatifactor_sp011959105	K14113	13482	NODE_41_length_132337_cov_18_822122	None	energy-converting hydrogenase B subunit D
1636	Acetatifactor_sp011959105	Acetatifactor_sp011959105	K05566	13483	NODE_41_length_132337_cov_18_822122	None	multicomponent Na+:H+ antiporter subunit B
1637	Acetatifactor_sp011959105	Acetatifactor_sp011959105	K05567	13484	NODE_41_length_132337_cov_18_822122	None	multicomponent Na+:H+ antiporter subunit C
1638	Acetatifactor_sp011959105	Acetatifactor_sp011959105	K04771	14337	NODE_15_length_192602_cov_15_584621	None	serine protease Do [EC:3.4.21.107]
1639	Acetatifactor_sp011959105	Acetatifactor_sp011959105	K03497	14355	NODE_15_length_192602_cov_15_584621	None	ParB family transcriptional regulator, chromosome partitioning protein
1640	Acetatifactor_sp011959105	Acetatifactor_sp011959105	K15896	14409	NODE_15_length_192602_cov_15_584621	None	UDP-4-amino-4,6-dideoxy-N-acetyl-beta-L-altrosamine N-acetyltransferase [EC:2.3.1.202]
1641	Acetatifactor_sp011959105	Acetatifactor_sp011959105	K19354	14414	NODE_15_length_192602_cov_15_584621	None	heptose III glucuronosyltransferase [EC:2.4.1.-]
1642	Acetatifactor_sp011959105	Acetatifactor_sp011959105	K05801	14496	NODE_827_length_23923_cov_13_399698	None	DnaJ like chaperone protein
1643	Acetatifactor_sp011959105	Acetatifactor_sp011959105	K00876	15620	NODE_164_length_73312_cov_12_071474	None	uridine kinase [EC:2.7.1.48]
1644	Acetatifactor_sp011959105	Acetatifactor_sp011959105	K01515	15628	NODE_164_length_73312_cov_12_071474	None	ADP-ribose pyrophosphatase [EC:3.6.1.13]
1645	Acetatifactor_sp011959105	Acetatifactor_sp011959105	K09017	15654	NODE_932_length_21785_cov_13_203451	None	TetR/AcrR family transcriptional regulator
1646	Acetatifactor_sp011959105	Acetatifactor_sp011959105	K07039	16899	NODE_1051_length_19798_cov_13_901281	None	uncharacterized protein
1647	Acetatifactor_sp011959105	Acetatifactor_sp011959105	K00389	17986	NODE_30_length_149858_cov_15_556724	None	putative membrane protein
1648	Acetatifactor_sp011959105	Acetatifactor_sp011959105	K13663	17998	NODE_30_length_149858_cov_15_556724	None	acyltransferase [EC:2.3.1.-]
1649	Acetatifactor_sp011959105	Acetatifactor_sp011959105	K21453	18002	NODE_30_length_149858_cov_15_556724	None	TetR/AcrR family transcriptional regulator, biofilm operon repressor
1650	Acetatifactor_sp011959105	Acetatifactor_sp011959105	K01929	18045	NODE_30_length_149858_cov_15_556724	None	UDP-N-acetylmuramoyl-tripeptide--D-alanyl-D-alanine ligase [EC:6.3.2.10]
1651	Acetatifactor_sp011959105	Acetatifactor_sp011959105	K03892	18053	NODE_30_length_149858_cov_15_556724	None	ArsR family transcriptional regulator, arsenate/arsenite/antimonite-responsive transcriptional repressor
1652	Acetatifactor_sp011959105	Acetatifactor_sp011959105	K19337	19125	NODE_215_length_63614_cov_15_223509	None	RpiR family transcriptional regulator, carbohydrate utilization regulator
1653	Acetatifactor_sp011959105	Acetatifactor_sp011959105	K12308	19151	NODE_215_length_63614_cov_15_223509	None	beta-galactosidase [EC:3.2.1.23]
1654	Acetatifactor_sp011959105	Acetatifactor_sp011959105	K02484	19165	NODE_577_length_31628_cov_12_718145	None	two-component system, OmpR family, sensor kinase [EC:2.7.13.3]
1655	Acetatifactor_sp011959105	Acetatifactor_sp011959105	K16209	20074	NODE_13_length_205171_cov_15_453119	None	lactose/raffinose/galactose permease
1656	Acetatifactor_sp011959105	Acetatifactor_sp011959105	K01506	20081	NODE_13_length_205171_cov_15_453119	None	5-aminopentanamidase [EC:3.5.1.30]
1657	Acetatifactor_sp011959105	Acetatifactor_sp011959105	K06889	20118	NODE_13_length_205171_cov_15_453119	None	uncharacterized protein
1658	Acetatifactor_sp011959105	Acetatifactor_sp011959105	K02346	20165	NODE_13_length_205171_cov_15_453119	None	DNA polymerase IV [EC:2.7.7.7]
1659	Acetatifactor_sp011959105	Acetatifactor_sp011959105	K12511	21676	NODE_204_length_65612_cov_16_144515	None	tight adherence protein C
1660	Acetatifactor_sp011959105	Acetatifactor_sp011959105	K07003	21732	NODE_2152_length_10921_cov_12_821185	None	uncharacterized protein
1661	Acetatifactor_sp011959105	Acetatifactor_sp011959105	K20976	24121	NODE_220_length_62708_cov_13_080475	None	histidine phosphotransfer protein HptB
1662	Acetatifactor_sp011959105	Acetatifactor_sp011959105	K03568	25758	NODE_185_length_69401_cov_11_534349	None	TldD protein
1663	Acetatifactor_sp011959105	Acetatifactor_sp011959105	K13059	25759	NODE_185_length_69401_cov_11_534349	None	N-acetylhexosamine 1-kinase [EC:2.7.1.162]
1664	Acetatifactor_sp011959105	Acetatifactor_sp011959105	K01176	28487	NODE_130_length_83251_cov_13_260974	None	alpha-amylase [EC:3.2.1.1]
1665	Acetatifactor_sp011959105	Acetatifactor_sp011959105	K09994	28494	NODE_130_length_83251_cov_13_260974	None	(aminoalkyl)phosphonate N-acetyltransferase [EC:2.3.1.280]
1666	Acetatifactor_sp011959105	Acetatifactor_sp011959105	K07705	28532	NODE_130_length_83251_cov_13_260974	None	two-component system, LytTR family, response regulator LytT
1667	Acetatifactor_sp011959105	Acetatifactor_sp011959105	K18445	30682	NODE_98_length_96321_cov_12_702356	None	diadenosine hexaphosphate hydrolase (ATP-forming) [EC:3.6.1.61]
1668	Acetatifactor_sp011959105	Acetatifactor_sp011959105	K06179	30707	NODE_98_length_96321_cov_12_702356	None	23S rRNA pseudouridine955/2504/2580 synthase [EC:5.4.99.24]
1669	Acetatifactor_sp011959105	Acetatifactor_sp011959105	K12984	31390	NODE_94_length_96797_cov_15_169771	None	(heptosyl)LPS beta-1,4-glucosyltransferase [EC:2.4.1.-]
1670	Acetatifactor_sp011959105	Acetatifactor_sp011959105	K02279	31394	NODE_94_length_96797_cov_15_169771	None	pilus assembly protein CpaB
1671	Acetatifactor_sp011959105	Acetatifactor_sp011959105	K03932	31409	NODE_94_length_96797_cov_15_169771	None	polyhydroxybutyrate depolymerase
1672	Acetatifactor_sp011959105	Acetatifactor_sp011959105	K10439	31418	NODE_94_length_96797_cov_15_169771	None	ribose transport system substrate-binding protein
1673	Acetatifactor_sp011959105	Acetatifactor_sp011959105	K07636	31436	NODE_94_length_96797_cov_15_169771	None	two-component system, OmpR family, phosphate regulon sensor histidine kinase PhoR [EC:2.7.13.3]
1674	Acetatifactor_sp011959105	Acetatifactor_sp011959105	K18967	36333	NODE_213_length_64308_cov_13_756245	None	diguanylate cyclase [EC:2.7.7.65]
1675	Acetatifactor_sp011959105	Acetatifactor_sp011959105	K01874	36351	NODE_213_length_64308_cov_13_756245	None	methionyl-tRNA synthetase [EC:6.1.1.10]
1676	Acetatifactor_sp011959105	Acetatifactor_sp011959105	K23351	37174	NODE_181_length_70068_cov_11_923186	None	glutaconyl-CoA/methylmalonyl-CoA decarboxylase subunit gamma
1677	Acetatifactor_sp011959105	Acetatifactor_sp011959105	K11921	39929	NODE_235_length_60330_cov_12_494185	None	LysR family transcriptional regulator, cyn operon transcriptional activator
1678	Acetatifactor_sp011959105	Acetatifactor_sp011959105	K11070	39969	NODE_235_length_60330_cov_12_494185	None	spermidine/putrescine transport system permease protein
1679	Acetatifactor_sp011959105	Acetatifactor_sp011959105	K11071	39970	NODE_235_length_60330_cov_12_494185	None	spermidine/putrescine transport system permease protein
0	Alistipes	Alistipes	K00134	40075	NODE_3_length_73278_cov_13_893736	M00001,M00002,M00003,M00308,M00552,M00165,M00166,M00611,M00612	glyceraldehyde 3-phosphate dehydrogenase [EC:1.2.1.12]
1	Alistipes	Alistipes	K01810	40081	NODE_3_length_73278_cov_13_893736	M00001,M00004,M00892,M00909	glucose-6-phosphate isomerase [EC:5.3.1.9]
2	Alistipes	Alistipes	K00873	29539	NODE_2_length_102688_cov_13_155983	M00001,M00002,M00049,M00050	pyruvate kinase [EC:2.7.1.40]
3	Alistipes	Alistipes	K01624	5344	NODE_42_length_26581_cov_13_327264	M00001,M00003,M00165,M00167,M00345,M00344,M00611,M00612	fructose-bisphosphate aldolase, class II [EC:4.1.2.13]
4	Alistipes	Alistipes	K01803	38143	NODE_172_length_13631_cov_12_591559	M00001,M00002,M00003	triosephosphate isomerase (TIM) [EC:5.3.1.1]
5	Alistipes	Alistipes	K00850	9636	NODE_37_length_28607_cov_12_267057	M00001,M00345	6-phosphofructokinase 1 [EC:2.7.1.11]
6	Alistipes	Alistipes	K15633	18119	NODE_23_length_33986_cov_11_126993	M00001,M00002,M00003	2,3-bisphosphoglycerate-independent phosphoglycerate mutase [EC:5.4.2.12]
7	Alistipes	Alistipes	K01689	13523	NODE_24_length_32569_cov_10_012918	M00001,M00002,M00003,M00346	enolase [EC:4.2.1.11]
8	Alistipes	Alistipes	K21071	20242	NODE_387_length_9178_cov_9_977749	M00001	ATP-dependent phosphofructokinase / diphosphate-dependent phosphofructokinase [EC:2.7.1.11 2.7.1.90]
9	Alistipes	Alistipes	K00845	37240	NODE_40_length_27091_cov_14_415779	M00001,M00549,M00892,M00909	glucokinase [EC:2.7.1.2]
10	Alistipes	Alistipes	K01834	31444	NODE_460_length_8526_cov_11_474678	M00001,M00002,M00003	2,3-bisphosphoglycerate-dependent phosphoglycerate mutase [EC:5.4.2.11]
11	Alistipes	Alistipes	K00927	5350	NODE_872_length_6315_cov_13_499201	M00001,M00002,M00003,M00308,M00552,M00165,M00166,M00611,M00612	phosphoglycerate kinase [EC:2.7.2.3]
12	Alistipes	Alistipes	K04041	2372	NODE_313_length_10202_cov_13_820144	M00003,M00611,M00612	fructose-1,6-bisphosphatase III [EC:3.1.3.11]
13	Alistipes	Alistipes	K03737	7315	NODE_49_length_25296_cov_11_425221	M00307,M00173,M00614	pyruvate-ferredoxin/flavodoxin oxidoreductase [EC:1.2.7.1 1.2.7.-]
14	Alistipes	Alistipes	K00382	9601	NODE_69_length_21914_cov_11_394940	M00307,M00009,M00011,M00532,M00036,M00032	dihydrolipoamide dehydrogenase [EC:1.8.1.4]
15	Alistipes	Alistipes	K00174	23196	NODE_866_length_6342_cov_9_936218	M00009,M00011,M00173,M00620,M00614	2-oxoglutarate/2-oxoacid ferredoxin oxidoreductase subunit alpha [EC:1.2.7.3 1.2.7.11]
16	Alistipes	Alistipes	K00174	23205	NODE_452_length_8590_cov_12_988401	M00009,M00011,M00173,M00620,M00614	2-oxoglutarate/2-oxoacid ferredoxin oxidoreductase subunit alpha [EC:1.2.7.3 1.2.7.11]
17	Alistipes	Alistipes	K00241	33357	NODE_109_length_17473_cov_12_686818	M00009,M00011,M00173,M00376,M00374,M00149,M00613,M00614	succinate dehydrogenase / fumarate reductase, cytochrome b subunit
18	Alistipes	Alistipes	K00176	23195	NODE_866_length_6342_cov_9_936218	M00009,M00011,M00173,M00620,M00614	2-oxoglutarate ferredoxin oxidoreductase subunit delta [EC:1.2.7.3]
19	Alistipes	Alistipes	K00024	3417	NODE_449_length_8623_cov_13_258403	M00009,M00011,M00012,M00740,M00168,M00173,M00374,M00620,M00346,M00614	malate dehydrogenase [EC:1.1.1.37]
20	Alistipes	Alistipes	K00024	5359	NODE_515_length_8143_cov_9_782888	M00009,M00011,M00012,M00740,M00168,M00173,M00374,M00620,M00346,M00614	malate dehydrogenase [EC:1.1.1.37]
21	Alistipes	Alistipes	K00177	23198	NODE_866_length_6342_cov_9_936218	M00009,M00011,M00173,M00620,M00614	2-oxoglutarate ferredoxin oxidoreductase subunit gamma [EC:1.2.7.3]
22	Alistipes	Alistipes	K00240	33355	NODE_109_length_17473_cov_12_686818	M00009,M00011,M00173,M00376,M00374,M00149,M00613,M00614	succinate dehydrogenase / fumarate reductase, iron-sulfur subunit [EC:1.3.5.1 1.3.5.4]
23	Alistipes	Alistipes	K00175	23204	NODE_452_length_8590_cov_12_988401	M00009,M00011,M00173,M00620,M00614	2-oxoglutarate/2-oxoacid ferredoxin oxidoreductase subunit beta [EC:1.2.7.3 1.2.7.11]
24	Alistipes	Alistipes	K00175	23197	NODE_866_length_6342_cov_9_936218	M00009,M00011,M00173,M00620,M00614	2-oxoglutarate/2-oxoacid ferredoxin oxidoreductase subunit beta [EC:1.2.7.3 1.2.7.11]
25	Alistipes	Alistipes	K01676	3413	NODE_449_length_8623_cov_13_258403	M00009,M00011,M00173,M00613,M00614	fumarate hydratase, class I [EC:4.2.1.2]
26	Alistipes	Alistipes	K00239	33356	NODE_109_length_17473_cov_12_686818	M00009,M00011,M00173,M00376,M00374,M00149,M00613,M00614	succinate dehydrogenase / fumarate reductase, flavoprotein subunit [EC:1.3.5.1 1.3.5.4]
27	Alistipes	Alistipes	K01783	35535	NODE_176_length_13425_cov_9_729544	M00004,M00007	ribulose-phosphate 3-epimerase [EC:5.1.3.1]
28	Alistipes	Alistipes	K01808	27919	NODE_6_length_62735_cov_11_316975	M00004,M00007,M00165,M00167,M00611,M00612	ribose 5-phosphate isomerase B [EC:5.3.1.6]
29	Alistipes	Alistipes	K00615	32206	NODE_119_length_16392_cov_13_182714	M00004,M00007,M00165,M00167,M00611,M00612	transketolase [EC:2.2.1.1]
30	Alistipes	Alistipes	K00948	35544	NODE_1879_length_4298_cov_11_207165	M00005	ribose-phosphate pyrophosphokinase [EC:2.7.6.1]
31	Alistipes	Alistipes	K01625	31458	NODE_141_length_15051_cov_9_747133	M00008,M00308,M00631,M00061	2-dehydro-3-deoxyphosphogluconate aldolase / (4S)-4-hydroxy-2-oxoglutarate aldolase [EC:4.1.2.14 4.1.3.42]
32	Alistipes	Alistipes	K00874	31459	NODE_141_length_15051_cov_9_747133	M00308,M00631,M00061	2-dehydro-3-deoxygluconokinase [EC:2.7.1.45]
33	Alistipes	Alistipes	K00874	14519	NODE_270_length_11093_cov_9_979706	M00308,M00631,M00061	2-dehydro-3-deoxygluconokinase [EC:2.7.1.45]
34	Alistipes	Alistipes	K00012	12135	NODE_138_length_15169_cov_13_505822	M00014,M00129	UDPglucose 6-dehydrogenase [EC:1.1.1.22]
35	Alistipes	Alistipes	K00854	13536	NODE_24_length_32569_cov_10_012918	M00014	xylulokinase [EC:2.7.1.17]
36	Alistipes	Alistipes	K01812	7335	NODE_9577_length_1596_cov_10_005840	M00631,M00061	glucuronate isomerase [EC:5.3.1.12]
37	Alistipes	Alistipes	K01685	31455	NODE_141_length_15051_cov_9_747133	M00631	altronate hydrolase [EC:4.2.1.7]
38	Alistipes	Alistipes	K00041	31456	NODE_141_length_15051_cov_9_747133	M00631	tagaturonate reductase [EC:1.1.1.58]
39	Alistipes	Alistipes	K01686	21771	NODE_22_length_36197_cov_13_726053	M00061	mannonate dehydratase [EC:4.2.1.8]
40	Alistipes	Alistipes	K01686	24170	NODE_29_length_30537_cov_15_249820	M00061	mannonate dehydratase [EC:4.2.1.8]
41	Alistipes	Alistipes	K01686	24171	NODE_29_length_30537_cov_15_249820	M00061	mannonate dehydratase [EC:4.2.1.8]
42	Alistipes	Alistipes	K01686	21772	NODE_22_length_36197_cov_13_726053	M00061	mannonate dehydratase [EC:4.2.1.8]
43	Alistipes	Alistipes	K01051	180	NODE_217_length_12194_cov_12_395502	M00081	pectinesterase [EC:3.1.1.11]
44	Alistipes	Alistipes	K01051	31454	NODE_141_length_15051_cov_9_747133	M00081	pectinesterase [EC:3.1.1.11]
45	Alistipes	Alistipes	K01785	33320	NODE_30_length_30261_cov_12_297027	M00632	aldose 1-epimerase [EC:5.1.3.3]
46	Alistipes	Alistipes	K01785	38158	NODE_171_length_13693_cov_9_424916	M00632	aldose 1-epimerase [EC:5.1.3.3]
47	Alistipes	Alistipes	K01785	13535	NODE_24_length_32569_cov_10_012918	M00632	aldose 1-epimerase [EC:5.1.3.3]
48	Alistipes	Alistipes	K00849	35529	NODE_176_length_13425_cov_9_729544	M00632,M00554	galactokinase [EC:2.7.1.6]
49	Alistipes	Alistipes	K01784	4453	NODE_4056_length_2803_cov_12_103348	M00632	UDP-glucose 4-epimerase [EC:5.1.3.2]
50	Alistipes	Alistipes	K01809	21759	NODE_622_length_7441_cov_10_726510	M00114	mannose-6-phosphate isomerase [EC:5.3.1.8]
51	Alistipes	Alistipes	K03077	33317	NODE_30_length_30261_cov_12_297027	M00550	L-ribulose-5-phosphate 4-epimerase [EC:5.1.3.4]
52	Alistipes	Alistipes	K03079	15670	NODE_25_length_32269_cov_12_114733	M00550	L-ribulose-5-phosphate 3-epimerase [EC:5.1.3.22]
53	Alistipes	Alistipes	K16150	16933	NODE_178_length_13396_cov_15_437823	M00854	glycogen synthase [EC:2.4.1.11]
54	Alistipes	Alistipes	K00700	9625	NODE_37_length_28607_cov_12_267057	M00854,M00565	1,4-alpha-glucan branching enzyme [EC:2.4.1.18]
55	Alistipes	Alistipes	K16153	16931	NODE_178_length_13396_cov_15_437823	M00854,M00855	glycogen phosphorylase/synthase [EC:2.4.1.1 2.4.1.11]
56	Alistipes	Alistipes	K01835	25007	NODE_7814_length_1846_cov_9_399777	M00855,M00549	phosphoglucomutase [EC:5.4.2.2]
57	Alistipes	Alistipes	K00688	16931	NODE_178_length_13396_cov_15_437823	M00855	glycogen phosphorylase [EC:2.4.1.1]
58	Alistipes	Alistipes	K00820	2361	NODE_701_length_7050_cov_9_387848	M00892,M00909	glutamine---fructose-6-phosphate transaminase (isomerizing) [EC:2.6.1.16]
59	Alistipes	Alistipes	K01847	26802	NODE_260_length_11471_cov_12_734145	M00373,M00741,M00376,M00613	methylmalonyl-CoA mutase [EC:5.4.99.2]
60	Alistipes	Alistipes	K05606	14512	NODE_439_length_8722_cov_10_325949	M00373,M00741,M00376,M00375,M00613	methylmalonyl-CoA/ethylmalonyl-CoA epimerase [EC:5.1.99.1]
61	Alistipes	Alistipes	K01966	14511	NODE_439_length_8722_cov_10_325949	M00373,M00741,M00613	propionyl-CoA carboxylase beta chain [EC:6.4.1.3 2.1.3.15]
62	Alistipes	Alistipes	K02437	5358	NODE_515_length_8143_cov_9_782888	M00532	glycine cleavage system H protein
63	Alistipes	Alistipes	K00281	37248	NODE_40_length_27091_cov_14_415779	M00532	glycine dehydrogenase [EC:1.4.4.2]
64	Alistipes	Alistipes	K00600	2363	NODE_701_length_7050_cov_9_387848	M00532,M00346,M00140,M00141	glycine hydroxymethyltransferase [EC:2.1.2.1]
65	Alistipes	Alistipes	K00605	3360	NODE_46_length_25729_cov_14_633403	M00532	aminomethyltransferase [EC:2.1.2.10]
66	Alistipes	Alistipes	K00029	32190	NODE_292_length_10623_cov_10_406605	M00169,M00172	malate dehydrogenase (oxaloacetate-decarboxylating)(NADP+) [EC:1.1.1.40]
67	Alistipes	Alistipes	K01006	27896	NODE_6_length_62735_cov_11_316975	M00169,M00172,M00171,M00173,M00614	pyruvate, orthophosphate dikinase [EC:2.7.9.1]
68	Alistipes	Alistipes	K01491	3405	NODE_16_length_41167_cov_11_487741	M00377,M00140,M00618	methylenetetrahydrofolate dehydrogenase (NADP+) / methenyltetrahydrofolate cyclohydrolase [EC:1.5.1.5 3.5.4.9]
69	Alistipes	Alistipes	K00297	29589	NODE_2_length_102688_cov_13_155983	M00377,M00618	methylenetetrahydrofolate reductase (NADPH) [EC:1.5.1.20]
70	Alistipes	Alistipes	K00925	29546	NODE_2_length_102688_cov_13_155983	M00579,M00357,M00617,M00618	acetate kinase [EC:2.7.2.1]
71	Alistipes	Alistipes	K22482	29688	NODE_52_length_24405_cov_12_197659	M00567,M00357,M00356,M00563	heterodisulfide reductase subunit C1 [EC:1.8.7.3]
72	Alistipes	Alistipes	K22481	29689	NODE_52_length_24405_cov_12_197659	M00567,M00357,M00356,M00563	heterodisulfide reductase subunit B1 [EC:1.8.7.3]
73	Alistipes	Alistipes	K00018	18121	NODE_23_length_33986_cov_11_126993	M00346	glycerate dehydrogenase [EC:1.1.1.29]
74	Alistipes	Alistipes	K00390	16956	NODE_114_length_16718_cov_7_497810	M00176,M00616	phosphoadenosine phosphosulfate reductase [EC:1.8.4.8 1.8.4.10]
75	Alistipes	Alistipes	K02120	2378	NODE_1484_length_4805_cov_15_061263	M00159	V/A-type H+/Na+-transporting ATPase subunit D
76	Alistipes	Alistipes	K02123	2379	NODE_1484_length_4805_cov_15_061263	M00159	V/A-type H+/Na+-transporting ATPase subunit I
77	Alistipes	Alistipes	K02121	29607	NODE_2_length_102688_cov_13_155983	M00159	V/A-type H+/Na+-transporting ATPase subunit E
78	Alistipes	Alistipes	K02124	34227	NODE_3398_length_3115_cov_13_177778	M00159	V/A-type H+/Na+-transporting ATPase subunit K
79	Alistipes	Alistipes	K00645	13550	NODE_24_length_32569_cov_10_012918	M00082,M00873,M00874	[acyl-carrier-protein] S-malonyltransferase [EC:2.3.1.39]
80	Alistipes	Alistipes	K00648	18143	NODE_1253_length_5245_cov_11_735260	M00082	3-oxoacyl-[acyl-carrier-protein] synthase III [EC:2.3.1.180]
81	Alistipes	Alistipes	K00059	2364	NODE_701_length_7050_cov_9_387848	M00083,M00874,M00572	3-oxoacyl-[acyl-carrier protein] reductase [EC:1.1.1.100]
82	Alistipes	Alistipes	K16363	27925	NODE_6_length_62735_cov_11_316975	M00083,M00866	UDP-3-O-[3-hydroxymyristoyl] N-acetylglucosamine deacetylase / 3-hydroxyacyl-[acyl-carrier-protein] dehydratase [EC:3.5.1.108 4.2.1.59]
83	Alistipes	Alistipes	K02372	27925	NODE_6_length_62735_cov_11_316975	M00083,M00572	3-hydroxyacyl-[acyl-carrier-protein] dehydratase [EC:4.2.1.59]
84	Alistipes	Alistipes	K09458	33312	NODE_30_length_30261_cov_12_297027	M00083,M00873,M00874,M00572	3-oxoacyl-[acyl-carrier-protein] synthase II [EC:2.3.1.179]
85	Alistipes	Alistipes	K00208	40010	NODE_5_length_63037_cov_12_914563	M00083,M00572	enoyl-[acyl-carrier protein] reductase I [EC:1.3.1.9 1.3.1.10]
86	Alistipes	Alistipes	K01897	3400	NODE_16_length_41167_cov_11_487741	M00086	long-chain acyl-CoA synthetase [EC:6.2.1.3]
87	Alistipes	Alistipes	K01897	12137	NODE_138_length_15169_cov_13_505822	M00086	long-chain acyl-CoA synthetase [EC:6.2.1.3]
88	Alistipes	Alistipes	K01897	20237	NODE_387_length_9178_cov_9_977749	M00086	long-chain acyl-CoA synthetase [EC:6.2.1.3]
89	Alistipes	Alistipes	K00655	8368	NODE_101_length_18370_cov_11_351297	M00089	1-acyl-sn-glycerol-3-phosphate acyltransferase [EC:2.3.1.51]
90	Alistipes	Alistipes	K01613	9622	NODE_37_length_28607_cov_12_267057	M00093	phosphatidylserine decarboxylase [EC:4.1.1.65]
91	Alistipes	Alistipes	K00981	9621	NODE_37_length_28607_cov_12_267057	M00093	phosphatidate cytidylyltransferase [EC:2.7.7.41]
92	Alistipes	Alistipes	K17103	26794	NODE_207_length_12390_cov_12_148764	M00093	CDP-diacylglycerol---serine O-phosphatidyltransferase [EC:2.7.8.8]
93	Alistipes	Alistipes	K01933	3409	NODE_16_length_41167_cov_11_487741	M00048	phosphoribosylformylglycinamidine cyclo-ligase [EC:6.3.3.1]
94	Alistipes	Alistipes	K01923	3411	NODE_16_length_41167_cov_11_487741	M00048	phosphoribosylaminoimidazole-succinocarboxamide synthase [EC:6.3.2.6]
95	Alistipes	Alistipes	K00764	3410	NODE_16_length_41167_cov_11_487741	M00048	amidophosphoribosyltransferase [EC:2.4.2.14]
96	Alistipes	Alistipes	K08289	29645	NODE_8_length_50720_cov_10_983282	M00048	phosphoribosylglycinamide formyltransferase 2 [EC:2.1.2.2]
97	Alistipes	Alistipes	K00602	3407	NODE_16_length_41167_cov_11_487741	M00048	phosphoribosylaminoimidazolecarboxamide formyltransferase / IMP cyclohydrolase [EC:2.1.2.3 3.5.4.10]
98	Alistipes	Alistipes	K01952	28574	NODE_451_length_8595_cov_10_634309	M00048	phosphoribosylformylglycinamidine synthase [EC:6.3.5.3]
99	Alistipes	Alistipes	K01588	28572	NODE_451_length_8595_cov_10_634309	M00048	5-(carboxyamino)imidazole ribonucleotide mutase [EC:5.4.99.18]
100	Alistipes	Alistipes	K11175	3408	NODE_16_length_41167_cov_11_487741	M00048	phosphoribosylglycinamide formyltransferase 1 [EC:2.1.2.2]
101	Alistipes	Alistipes	K01756	32214	NODE_520_length_8109_cov_13_366526	M00048,M00049	adenylosuccinate lyase [EC:4.3.2.2]
102	Alistipes	Alistipes	K01756	34959	NODE_1319_length_5093_cov_15_177054	M00048,M00049	adenylosuccinate lyase [EC:4.3.2.2]
103	Alistipes	Alistipes	K01589	28573	NODE_451_length_8595_cov_10_634309	M00048	5-(carboxyamino)imidazole ribonucleotide synthase [EC:6.3.4.18]
104	Alistipes	Alistipes	K01945	3406	NODE_16_length_41167_cov_11_487741	M00048	phosphoribosylamine---glycine ligase [EC:6.3.4.13]
105	Alistipes	Alistipes	K00939	12095	NODE_66_length_22085_cov_13_129006	M00049	adenylate kinase [EC:2.7.4.3]
106	Alistipes	Alistipes	K01939	3367	NODE_417_length_8936_cov_9_262808	M00049	adenylosuccinate synthase [EC:6.3.4.4]
107	Alistipes	Alistipes	K01951	13525	NODE_24_length_32569_cov_10_012918	M00050	GMP synthase (glutamine-hydrolysing) [EC:6.3.5.2]
108	Alistipes	Alistipes	K00942	9594	NODE_69_length_21914_cov_11_394940	M00050	guanylate kinase [EC:2.7.4.8]
109	Alistipes	Alistipes	K00088	13526	NODE_24_length_32569_cov_10_012918	M00050	IMP dehydrogenase [EC:1.1.1.205]
110	Alistipes	Alistipes	K17828	28567	NODE_451_length_8595_cov_10_634309	M00051	dihydroorotate dehydrogenase (NAD+) catalytic subunit [EC:1.3.1.14]
111	Alistipes	Alistipes	K01955	9640	NODE_37_length_28607_cov_12_267057	M00051	carbamoyl-phosphate synthase large subunit [EC:6.3.5.5]
112	Alistipes	Alistipes	K00762	28570	NODE_451_length_8595_cov_10_634309	M00051	orotate phosphoribosyltransferase [EC:2.4.2.10]
113	Alistipes	Alistipes	K00226	3355	NODE_46_length_25729_cov_14_633403	M00051	dihydroorotate dehydrogenase (fumarate) [EC:1.3.98.1]
114	Alistipes	Alistipes	K01591	28568	NODE_451_length_8595_cov_10_634309	M00051	orotidine-5'-phosphate decarboxylase [EC:4.1.1.23]
115	Alistipes	Alistipes	K00609	28571	NODE_451_length_8595_cov_10_634309	M00051	aspartate carbamoyltransferase catalytic subunit [EC:2.1.3.2]
116	Alistipes	Alistipes	K01956	9639	NODE_37_length_28607_cov_12_267057	M00051	carbamoyl-phosphate synthase small subunit [EC:6.3.5.5]
117	Alistipes	Alistipes	K01465	9638	NODE_37_length_28607_cov_12_267057	M00051	dihydroorotase [EC:3.5.2.3]
118	Alistipes	Alistipes	K00254	40040	NODE_3_length_73278_cov_13_893736	M00051	dihydroorotate dehydrogenase [EC:1.3.5.2]
119	Alistipes	Alistipes	K09903	24989	NODE_126_length_15882_cov_14_003033	M00052	uridylate kinase [EC:2.7.4.22]
120	Alistipes	Alistipes	K01937	29549	NODE_2_length_102688_cov_13_155983	M00052	CTP synthase [EC:6.3.4.2]
121	Alistipes	Alistipes	K00560	29684	NODE_52_length_24405_cov_12_197659	M00053	thymidylate synthase [EC:2.1.1.45]
122	Alistipes	Alistipes	K21636	27902	NODE_6_length_62735_cov_11_316975	M00053	ribonucleoside-triphosphate reductase (formate) [EC:1.1.98.6]
123	Alistipes	Alistipes	K00943	12089	NODE_66_length_22085_cov_13_129006	M00053	dTMP kinase [EC:2.7.4.9]
124	Alistipes	Alistipes	K00525	12113	NODE_20_length_37506_cov_13_179541	M00053	ribonucleoside-diphosphate reductase alpha chain [EC:1.17.4.1]
125	Alistipes	Alistipes	K00831	23192	NODE_866_length_6342_cov_9_936218	M00020,M00124	phosphoserine aminotransferase [EC:2.6.1.52]
126	Alistipes	Alistipes	K00058	23193	NODE_866_length_6342_cov_9_936218	M00020	D-3-phosphoglycerate dehydrogenase / 2-oxoglutarate reductase [EC:1.1.1.95 1.1.1.399]
127	Alistipes	Alistipes	K01079	29665	NODE_8_length_50720_cov_10_983282	M00020	phosphoserine phosphatase [EC:3.1.3.3]
128	Alistipes	Alistipes	K00133	29676	NODE_52_length_24405_cov_12_197659	M00018,M00033,M00017,M00016,M00525,M00526,M00527	aspartate-semialdehyde dehydrogenase [EC:1.2.1.11]
129	Alistipes	Alistipes	K00789	29636	NODE_35_length_28717_cov_13_418987	M00609,M00034,M00035,M00368	S-adenosylmethionine synthetase [EC:2.5.1.6]
130	Alistipes	Alistipes	K00548	29590	NODE_2_length_102688_cov_13_155983	M00017	5-methyltetrahydrofolate--homocysteine methyltransferase [EC:2.1.1.13]
131	Alistipes	Alistipes	K14155	26790	NODE_207_length_12390_cov_12_148764	M00017	cysteine-S-conjugate beta-lyase [EC:4.4.1.13]
132	Alistipes	Alistipes	K01251	9624	NODE_37_length_28607_cov_12_267057	M00035	adenosylhomocysteinase [EC:3.3.1.1]
133	Alistipes	Alistipes	K00558	16960	NODE_114_length_16718_cov_7_497810	M00035	DNA (cytosine-5)-methyltransferase 1 [EC:2.1.1.37]
134	Alistipes	Alistipes	K00826	28562	NODE_462_length_8517_cov_13_586504	M00019,M00570,M00036,M00119	branched-chain amino acid aminotransferase [EC:2.6.1.42]
135	Alistipes	Alistipes	K01714	3364	NODE_417_length_8936_cov_9_262808	M00016,M00525,M00526,M00527	4-hydroxy-tetrahydrodipicolinate synthase [EC:4.3.3.7]
136	Alistipes	Alistipes	K01778	6345	NODE_1163_length_5470_cov_11_854294	M00016,M00525,M00527	diaminopimelate epimerase [EC:5.1.1.7]
137	Alistipes	Alistipes	K00215	9605	NODE_69_length_21914_cov_11_394940	M00016,M00525,M00526,M00527	4-hydroxy-tetrahydrodipicolinate reductase [EC:1.17.1.8]
138	Alistipes	Alistipes	K00674	27893	NODE_6_length_62735_cov_11_316975	M00016	2,3,4,5-tetrahydropyridine-2,6-dicarboxylate N-succinyltransferase [EC:2.3.1.117]
139	Alistipes	Alistipes	K05823	29588	NODE_2_length_102688_cov_13_155983	M00525	N-acetyldiaminopimelate deacetylase [EC:3.5.1.47]
140	Alistipes	Alistipes	K10206	29642	NODE_8_length_50720_cov_10_983282	M00527	LL-diaminopimelate aminotransferase [EC:2.6.1.83]
141	Alistipes	Alistipes	K00290	15701	NODE_982_length_5958_cov_11_120108	M00030	saccharopine dehydrogenase (NAD+, L-lysine forming) [EC:1.5.1.7]
142	Alistipes	Alistipes	K01480	2370	NODE_313_length_10202_cov_13_820144	M00133	agmatinase [EC:3.5.3.11]
143	Alistipes	Alistipes	K03786	29538	NODE_2_length_102688_cov_13_155983	M00022	3-dehydroquinate dehydratase II [EC:4.2.1.10]
144	Alistipes	Alistipes	K00800	3376	NODE_16_length_41167_cov_11_487741	M00022	3-phosphoshikimate 1-carboxyvinyltransferase [EC:2.5.1.19]
145	Alistipes	Alistipes	K01735	37233	NODE_50_length_24951_cov_10_595959	M00022	3-dehydroquinate synthase [EC:4.2.3.4]
146	Alistipes	Alistipes	K01736	3377	NODE_16_length_41167_cov_11_487741	M00022	chorismate synthase [EC:4.2.3.5]
147	Alistipes	Alistipes	K00014	14526	NODE_270_length_11093_cov_9_979706	M00022	shikimate dehydrogenase [EC:1.1.1.25]
148	Alistipes	Alistipes	K00891	8371	NODE_101_length_18370_cov_11_351297	M00022	shikimate kinase [EC:2.7.1.71]
149	Alistipes	Alistipes	K04516	40095	NODE_3_length_73278_cov_13_893736	M00024,M00025	chorismate mutase [EC:5.4.99.5]
150	Alistipes	Alistipes	K12373	19196	NODE_208_length_12373_cov_10_419955	M00079	hexosaminidase [EC:3.2.1.52]
151	Alistipes	Alistipes	K12373	15671	NODE_25_length_32269_cov_12_114733	M00079	hexosaminidase [EC:3.2.1.52]
152	Alistipes	Alistipes	K03269	29683	NODE_52_length_24405_cov_12_197659	M00060,M00866	UDP-2,3-diacylglucosamine hydrolase [EC:3.6.1.54]
153	Alistipes	Alistipes	K02527	39986	NODE_5_length_63037_cov_12_914563	M00060,M00866	3-deoxy-D-manno-octulosonic-acid transferase [EC:2.4.99.12 2.4.99.13 2.4.99.14 2.4.99.15]
154	Alistipes	Alistipes	K00912	7329	NODE_49_length_25296_cov_11_425221	M00060,M00866	tetraacyldisaccharide 4'-kinase [EC:2.7.1.130]
155	Alistipes	Alistipes	K02517	13528	NODE_24_length_32569_cov_10_012918	M00060,M00866	Kdo2-lipid IVA lauroyltransferase/acyltransferase [EC:2.3.1.241 2.3.1.-]
156	Alistipes	Alistipes	K02536	12109	NODE_20_length_37506_cov_13_179541	M00060,M00866	UDP-3-O-[3-hydroxymyristoyl] glucosamine N-acyltransferase [EC:2.3.1.191]
157	Alistipes	Alistipes	K00677	27924	NODE_6_length_62735_cov_11_316975	M00060,M00866	UDP-N-acetylglucosamine acyltransferase [EC:2.3.1.129]
158	Alistipes	Alistipes	K00748	23202	NODE_452_length_8590_cov_12_988401	M00060,M00866	lipid-A-disaccharide synthase [EC:2.4.1.182]
159	Alistipes	Alistipes	K03270	21764	NODE_22_length_36197_cov_13_726053	M00063	3-deoxy-D-manno-octulosonate 8-phosphate phosphatase (KDO 8-P phosphatase) [EC:3.1.3.45]
160	Alistipes	Alistipes	K00979	37220	NODE_50_length_24951_cov_10_595959	M00063	3-deoxy-manno-octulosonate cytidylyltransferase (CMP-KDO synthetase) [EC:2.7.7.38]
161	Alistipes	Alistipes	K01627	37219	NODE_50_length_24951_cov_10_595959	M00063	2-dehydro-3-deoxyphosphooctonate aldolase (KDO 8-P synthase) [EC:2.5.1.55]
162	Alistipes	Alistipes	K06041	37218	NODE_50_length_24951_cov_10_595959	M00063	arabinose-5-phosphate isomerase [EC:5.3.1.13]
163	Alistipes	Alistipes	K00946	12096	NODE_66_length_22085_cov_13_129006	M00127,M00895,M00896	thiamine-monophosphate kinase [EC:2.7.4.16]
164	Alistipes	Alistipes	K00946	29537	NODE_2_length_102688_cov_13_155983	M00127,M00895,M00896	thiamine-monophosphate kinase [EC:2.7.4.16]
165	Alistipes	Alistipes	K00793	37229	NODE_50_length_24951_cov_10_595959	M00125,M00911	riboflavin synthase [EC:2.5.1.9]
166	Alistipes	Alistipes	K01497	34970	NODE_430_length_8796_cov_10_148381	M00125,M00911	GTP cyclohydrolase II [EC:3.5.4.25]
167	Alistipes	Alistipes	K11753	38155	NODE_171_length_13693_cov_9_424916	M00125	riboflavin kinase / FMN adenylyltransferase [EC:2.7.1.26 2.7.7.2]
168	Alistipes	Alistipes	K11753	9623	NODE_37_length_28607_cov_12_267057	M00125	riboflavin kinase / FMN adenylyltransferase [EC:2.7.1.26 2.7.7.2]
169	Alistipes	Alistipes	K00794	3354	NODE_46_length_25729_cov_14_633403	M00125,M00911	6,7-dimethyl-8-ribityllumazine synthase [EC:2.5.1.78]
170	Alistipes	Alistipes	K14652	34970	NODE_430_length_8796_cov_10_148381	M00125,M00840	3,4-dihydroxy 2-butanone 4-phosphate synthase / GTP cyclohydrolase II [EC:4.1.99.12 3.5.4.25]
171	Alistipes	Alistipes	K03473	2371	NODE_313_length_10202_cov_13_820144	M00124	erythronate-4-phosphate dehydrogenase [EC:1.1.1.290]
172	Alistipes	Alistipes	K03474	29533	NODE_2_length_102688_cov_13_155983	M00124	pyridoxine 5-phosphate synthase [EC:2.6.99.2]
173	Alistipes	Alistipes	K00767	40017	NODE_5_length_63037_cov_12_914563	M00115,M00912	nicotinate-nucleotide pyrophosphorylase (carboxylating) [EC:2.4.2.19]
174	Alistipes	Alistipes	K01950	40028	NODE_5_length_63037_cov_12_914563	M00115,M00912	NAD+ synthase (glutamine-hydrolysing) [EC:6.3.5.1]
175	Alistipes	Alistipes	K00969	9595	NODE_69_length_21914_cov_11_394940	M00115,M00912	nicotinate-nucleotide adenylyltransferase [EC:2.7.7.18]
176	Alistipes	Alistipes	K00278	30789	NODE_332_length_9913_cov_10_867925	M00115	L-aspartate oxidase [EC:1.4.3.16]
177	Alistipes	Alistipes	K03517	24987	NODE_126_length_15882_cov_14_003033	M00115	quinolinate synthase [EC:2.5.1.72]
178	Alistipes	Alistipes	K06989	6337	NODE_566_length_7747_cov_9_647036	M00115	aspartate dehydrogenase [EC:1.4.1.21]
179	Alistipes	Alistipes	K00606	37234	NODE_50_length_24951_cov_10_595959	M00119,M00913,M00914	3-methyl-2-oxobutanoate hydroxymethyltransferase [EC:2.1.2.11]
180	Alistipes	Alistipes	K01918	40011	NODE_5_length_63037_cov_12_914563	M00119,M00913	pantoate--beta-alanine ligase [EC:6.3.2.1]
181	Alistipes	Alistipes	K01579	40012	NODE_5_length_63037_cov_12_914563	M00119	aspartate 1-decarboxylase [EC:4.1.1.11]
182	Alistipes	Alistipes	K13038	39994	NODE_5_length_63037_cov_12_914563	M00120,M00914	phosphopantothenoylcysteine decarboxylase / phosphopantothenate---cysteine ligase [EC:4.1.1.36 6.3.2.5]
183	Alistipes	Alistipes	K00859	1266	NODE_4209_length_2741_cov_8_843634	M00120	dephospho-CoA kinase [EC:2.7.1.24]
184	Alistipes	Alistipes	K03525	27913	NODE_6_length_62735_cov_11_316975	M00120	type III pantothenate kinase [EC:2.7.1.33]
185	Alistipes	Alistipes	K00954	12110	NODE_20_length_37506_cov_13_179541	M00120	pantetheine-phosphate adenylyltransferase [EC:2.7.7.3]
186	Alistipes	Alistipes	K03801	19209	NODE_224_length_12024_cov_14_055811	M00881	lipoyl(octanoyl) transferase [EC:2.3.1.181]
187	Alistipes	Alistipes	K03644	19210	NODE_224_length_12024_cov_14_055811	M00881,M00882,M00883,M00884	lipoyl synthase [EC:2.8.1.8]
188	Alistipes	Alistipes	K22391	18135	NODE_552_length_7809_cov_12_631158	M00126	GTP cyclohydrolase I [EC:3.5.4.16]
189	Alistipes	Alistipes	K00796	1265	NODE_4209_length_2741_cov_8_843634	M00126	dihydropteroate synthase [EC:2.5.1.15]
190	Alistipes	Alistipes	K01495	3342	NODE_46_length_25729_cov_14_633403	M00126,M00841,M00842,M00843	GTP cyclohydrolase IA [EC:3.5.4.16]
191	Alistipes	Alistipes	K01633	40103	NODE_92_length_19054_cov_13_348650	M00126,M00840	7,8-dihydroneopterin aldolase/epimerase/oxygenase [EC:4.1.2.25 5.1.99.8 1.13.11.81]
192	Alistipes	Alistipes	K00950	29625	NODE_35_length_28717_cov_13_418987	M00126	2-amino-4-hydroxy-6-hydroxymethyldihydropteridine diphosphokinase [EC:2.7.6.3]
193	Alistipes	Alistipes	K11754	21789	NODE_22_length_36197_cov_13_726053	M00126,M00841	dihydrofolate synthase / folylpolyglutamate synthase [EC:6.3.2.12 6.3.2.17]
194	Alistipes	Alistipes	K00287	29685	NODE_52_length_24405_cov_12_197659	M00126,M00840	dihydrofolate reductase [EC:1.5.1.3]
195	Alistipes	Alistipes	K01737	24986	NODE_126_length_15882_cov_14_003033	M00842,M00843	6-pyruvoyltetrahydropterin/6-carboxytetrahydropterin synthase [EC:4.2.3.12 4.1.2.50]
196	Alistipes	Alistipes	K01719	40063	NODE_3_length_73278_cov_13_893736	M00846,M00868,M00121,M00926	uroporphyrinogen-III synthase [EC:4.2.1.75]
197	Alistipes	Alistipes	K02495	23187	NODE_1850_length_4324_cov_13_687749	M00121	oxygen-independent coproporphyrinogen III oxidase [EC:1.3.98.3]
198	Alistipes	Alistipes	K01885	13534	NODE_24_length_32569_cov_10_012918	M00121	glutamyl-tRNA synthetase [EC:6.1.1.17]
199	Alistipes	Alistipes	K02189	29650	NODE_8_length_50720_cov_10_983282	M00924	cobalt-precorrin 5A hydrolase [EC:3.7.1.12]
200	Alistipes	Alistipes	K06042	29652	NODE_8_length_50720_cov_10_983282	M00924,M00925	precorrin-8X/cobalt-precorrin-8 methylmutase [EC:5.4.99.61 5.4.99.60]
201	Alistipes	Alistipes	K05934	29652	NODE_8_length_50720_cov_10_983282	M00924,M00925	precorrin-3B C17-methyltransferase [EC:2.1.1.131]
202	Alistipes	Alistipes	K05936	29650	NODE_8_length_50720_cov_10_983282	M00924,M00925	precorrin-4/cobalt-precorrin-4 C11-methyltransferase [EC:2.1.1.133 2.1.1.271]
203	Alistipes	Alistipes	K00595	29651	NODE_8_length_50720_cov_10_983282	M00924,M00925	precorrin-6B C5,15-methyltransferase / cobalt-precorrin-6B C5,C15-methyltransferase [EC:2.1.1.132 2.1.1.289 2.1.1.196]
204	Alistipes	Alistipes	K02190	29654	NODE_8_length_50720_cov_10_983282	M00924	sirohydrochlorin cobaltochelatase [EC:4.99.1.3]
205	Alistipes	Alistipes	K02224	29656	NODE_8_length_50720_cov_10_983282	M00924,M00925	cobyrinic acid a,c-diamide synthase [EC:6.3.5.9 6.3.5.11]
206	Alistipes	Alistipes	K02188	29649	NODE_8_length_50720_cov_10_983282	M00924	cobalt-precorrin-5B (C1)-methyltransferase [EC:2.1.1.195]
207	Alistipes	Alistipes	K00798	29657	NODE_8_length_50720_cov_10_983282	M00122	cob(I)alamin adenosyltransferase [EC:2.5.1.17]
208	Alistipes	Alistipes	K00798	14537	NODE_7_length_55443_cov_13_641348	M00122	cob(I)alamin adenosyltransferase [EC:2.5.1.17]
209	Alistipes	Alistipes	K00798	8398	NODE_78_length_20838_cov_9_857432	M00122	cob(I)alamin adenosyltransferase [EC:2.5.1.17]
210	Alistipes	Alistipes	K02233	29662	NODE_8_length_50720_cov_10_983282	M00122	adenosylcobinamide-GDP ribazoletransferase [EC:2.7.8.26]
211	Alistipes	Alistipes	K02227	29660	NODE_8_length_50720_cov_10_983282	M00122	adenosylcobinamide-phosphate synthase [EC:6.3.1.10]
212	Alistipes	Alistipes	K00768	29663	NODE_8_length_50720_cov_10_983282	M00122	nicotinate-nucleotide--dimethylbenzimidazole phosphoribosyltransferase [EC:2.4.2.21]
213	Alistipes	Alistipes	K02231	29664	NODE_8_length_50720_cov_10_983282	M00122	adenosylcobinamide kinase / adenosylcobinamide-phosphate guanylyltransferase [EC:2.7.1.156 2.7.7.62]
214	Alistipes	Alistipes	K02226	29661	NODE_8_length_50720_cov_10_983282	M00122	alpha-ribazole phosphatase [EC:3.1.3.73]
215	Alistipes	Alistipes	K02232	29658	NODE_8_length_50720_cov_10_983282	M00122	adenosylcobyric acid synthase [EC:6.3.5.10]
216	Alistipes	Alistipes	K03183	32184	NODE_292_length_10623_cov_10_406605	M00117,M00116	demethylmenaquinone methyltransferase / 2-methoxy-6-polyprenyl-1,4-benzoquinol methylase [EC:2.1.1.163 2.1.1.201]
217	Alistipes	Alistipes	K02548	12131	NODE_20_length_37506_cov_13_179541	M00116	1,4-dihydroxy-2-naphthoate polyprenyltransferase [EC:2.5.1.74]
218	Alistipes	Alistipes	K01823	160	NODE_112_length_17276_cov_11_741188	M00095,M00849,M00096,M00364,M00365,M00366,M00367	isopentenyl-diphosphate Delta-isomerase [EC:5.3.3.2]
219	Alistipes	Alistipes	K03527	40068	NODE_3_length_73278_cov_13_893736	M00096	4-hydroxy-3-methylbut-2-en-1-yl diphosphate reductase [EC:1.17.7.4]
220	Alistipes	Alistipes	K00991	7327	NODE_49_length_25296_cov_11_425221	M00096	2-C-methyl-D-erythritol 4-phosphate cytidylyltransferase [EC:2.7.7.60]
221	Alistipes	Alistipes	K00919	3393	NODE_16_length_41167_cov_11_487741	M00096	4-diphosphocytidyl-2-C-methyl-D-erythritol kinase [EC:2.7.1.148]
222	Alistipes	Alistipes	K01770	7323	NODE_49_length_25296_cov_11_425221	M00096	2-C-methyl-D-erythritol 2,4-cyclodiphosphate synthase [EC:4.6.1.12]
223	Alistipes	Alistipes	K01662	24990	NODE_126_length_15882_cov_14_003033	M00096	1-deoxy-D-xylulose-5-phosphate synthase [EC:2.2.1.7]
224	Alistipes	Alistipes	K03526	3341	NODE_46_length_25729_cov_14_633403	M00096	(E)-4-hydroxy-3-methylbut-2-enyl-diphosphate synthase [EC:1.17.7.1 1.17.7.3]
225	Alistipes	Alistipes	K00099	23190	NODE_2144_length_4001_cov_10_676888	M00096	1-deoxy-D-xylulose-5-phosphate reductoisomerase [EC:1.1.1.267]
226	Alistipes	Alistipes	K13787	37239	NODE_40_length_27091_cov_14_415779	M00364,M00365,M00921	geranylgeranyl diphosphate synthase, type I [EC:2.5.1.1 2.5.1.10 2.5.1.29]
227	Alistipes	Alistipes	K00067	3391	NODE_16_length_41167_cov_11_487741	M00793	dTDP-4-dehydrorhamnose reductase [EC:1.1.1.133]
228	Alistipes	Alistipes	K01790	3390	NODE_16_length_41167_cov_11_487741	M00793	dTDP-4-dehydrorhamnose 3,5-epimerase [EC:5.1.3.13]
229	Alistipes	Alistipes	K01710	3392	NODE_16_length_41167_cov_11_487741	M00793	dTDP-glucose 4,6-dehydratase [EC:4.2.1.46]
230	Alistipes	Alistipes	K00973	3389	NODE_16_length_41167_cov_11_487741	M00793	glucose-1-phosphate thymidylyltransferase [EC:2.7.7.24]
231	Alistipes	Alistipes	K00588	9611	NODE_69_length_21914_cov_11_394940	M00039	caffeoyl-CoA O-methyltransferase [EC:2.1.1.104]
232	Alistipes	Alistipes	K02078	33311	NODE_30_length_30261_cov_12_297027	M00848	acyl carrier protein
233	Alistipes	Alistipes	K01821	28548	NODE_305_length_10302_cov_11_920074	M00569	4-oxalocrotonate tautomerase [EC:5.3.2.6]
234	Alistipes	Alistipes	K12340	40106	NODE_92_length_19054_cov_13_348650	M00575,M00696,M00697	outer membrane protein
235	Alistipes	Alistipes	K12340	19211	NODE_224_length_12024_cov_14_055811	M00575,M00696,M00697	outer membrane protein
236	Alistipes	Alistipes	K12340	28555	NODE_442_length_8686_cov_10_194647	M00575,M00696,M00697	outer membrane protein
237	Alistipes	Alistipes	K12340	9627	NODE_37_length_28607_cov_12_267057	M00575,M00696,M00697	outer membrane protein
238	Alistipes	Alistipes	K12340	12093	NODE_66_length_22085_cov_13_129006	M00575,M00696,M00697	outer membrane protein
239	Alistipes	Alistipes	K17836	19197	NODE_208_length_12373_cov_10_419955	M00627	beta-lactamase class A [EC:3.5.2.6]
240	Alistipes	Alistipes	K02172	18108	NODE_23_length_33986_cov_11_126993	M00627	bla regulator protein blaR1
241	Alistipes	Alistipes	K02171	20233	NODE_134_length_15328_cov_13_787534	M00627	BlaI family transcriptional regulator, penicillinase repressor
242	Alistipes	Alistipes	K02171	7313	NODE_2856_length_3459_cov_9_532902	M00627	BlaI family transcriptional regulator, penicillinase repressor
243	Alistipes	Alistipes	K02171	18107	NODE_23_length_33986_cov_11_126993	M00627	BlaI family transcriptional regulator, penicillinase repressor
244	Alistipes	Alistipes	K18353	29593	NODE_2_length_102688_cov_13_155983	M00651	vancomycin resistance protein VanJ
245	Alistipes	Alistipes	K03585	12091	NODE_66_length_22085_cov_13_129006	M00718	membrane fusion protein, multidrug efflux system
246	Alistipes	Alistipes	K03585	29637	NODE_8_length_50720_cov_10_983282	M00718	membrane fusion protein, multidrug efflux system
247	Alistipes	Alistipes	K03585	26797	NODE_260_length_11471_cov_12_734145	M00718	membrane fusion protein, multidrug efflux system
248	Alistipes	Alistipes	K18139	29639	NODE_8_length_50720_cov_10_983282	M00718,M00642,M00643	outer membrane protein, multidrug efflux system
249	Alistipes	Alistipes	K18908	3345	NODE_46_length_25729_cov_14_633403	M00705	multidrug efflux pump
250	Alistipes	Alistipes	K22418	9632	NODE_37_length_28607_cov_12_267057	None	11beta/17beta-hydroxysteroid dehydrogenase [EC:1.1.1.146 1.1.1.-]
251	Alistipes	Alistipes	K09710	9619	NODE_37_length_28607_cov_12_267057	None	ribosome-associated protein
252	Alistipes	Alistipes	K03798	9620	NODE_37_length_28607_cov_12_267057	None	cell division protease FtsH [EC:3.4.24.-]
253	Alistipes	Alistipes	K03305	9626	NODE_37_length_28607_cov_12_267057	None	proton-dependent oligopeptide transporter, POT family
254	Alistipes	Alistipes	K03701	9608	NODE_69_length_21914_cov_11_394940	None	excinuclease ABC subunit A
255	Alistipes	Alistipes	K03701	30777	NODE_3263_length_3192_cov_12_466688	None	excinuclease ABC subunit A
256	Alistipes	Alistipes	K01921	9596	NODE_69_length_21914_cov_11_394940	None	D-alanine-D-alanine ligase [EC:6.3.2.4]
257	Alistipes	Alistipes	K03100	9606	NODE_69_length_21914_cov_11_394940	None	signal peptidase I [EC:3.4.21.89]
258	Alistipes	Alistipes	K03116	9634	NODE_37_length_28607_cov_12_267057	None	sec-independent protein translocase protein TatA
259	Alistipes	Alistipes	K03118	9633	NODE_37_length_28607_cov_12_267057	None	sec-independent protein translocase protein TatC
260	Alistipes	Alistipes	K00986	9617	NODE_1050_length_5762_cov_20_460662	None	RNA-directed DNA polymerase [EC:2.7.7.49]
261	Alistipes	Alistipes	K00986	14589	NODE_7_length_55443_cov_13_641348	None	RNA-directed DNA polymerase [EC:2.7.7.49]
262	Alistipes	Alistipes	K01091	9635	NODE_37_length_28607_cov_12_267057	None	phosphoglycolate phosphatase [EC:3.1.3.18]
263	Alistipes	Alistipes	K08659	9600	NODE_69_length_21914_cov_11_394940	None	dipeptidase [EC:3.4.-.-]
264	Alistipes	Alistipes	K02823	9641	NODE_37_length_28607_cov_12_267057	None	dihydroorotate dehydrogenase electron transfer subunit
265	Alistipes	Alistipes	K02823	21774	NODE_22_length_36197_cov_13_726053	None	dihydroorotate dehydrogenase electron transfer subunit
266	Alistipes	Alistipes	K06997	9599	NODE_69_length_21914_cov_11_394940	None	PLP dependent protein
267	Alistipes	Alistipes	K00856	9637	NODE_37_length_28607_cov_12_267057	None	adenosine kinase [EC:2.7.1.20]
268	Alistipes	Alistipes	K06167	9631	NODE_37_length_28607_cov_12_267057	None	phosphoribosyl 1,2-cyclic phosphate phosphodiesterase [EC:3.1.4.55]
269	Alistipes	Alistipes	K06173	9604	NODE_69_length_21914_cov_11_394940	None	tRNA pseudouridine38-40 synthase [EC:5.4.99.12]
270	Alistipes	Alistipes	K08956	9620	NODE_37_length_28607_cov_12_267057	None	AFG3 family protein [EC:3.4.24.-]
271	Alistipes	Alistipes	K07462	19208	NODE_224_length_12024_cov_14_055811	None	single-stranded-DNA-specific exonuclease [EC:3.1.-.-]
272	Alistipes	Alistipes	K04078	19206	NODE_224_length_12024_cov_14_055811	None	chaperonin GroES
273	Alistipes	Alistipes	K01890	19198	NODE_208_length_12373_cov_10_419955	None	phenylalanyl-tRNA synthetase beta chain [EC:6.1.1.20]
274	Alistipes	Alistipes	K21573	35521	NODE_60_length_23542_cov_14_297569	None	TonB-dependent starch-binding outer membrane protein SusC
275	Alistipes	Alistipes	K21573	24163	NODE_29_length_30537_cov_15_249820	None	TonB-dependent starch-binding outer membrane protein SusC
276	Alistipes	Alistipes	K21573	31462	NODE_549_length_7821_cov_16_085115	None	TonB-dependent starch-binding outer membrane protein SusC
277	Alistipes	Alistipes	K21573	25804	NODE_32_length_29095_cov_14_501618	None	TonB-dependent starch-binding outer membrane protein SusC
278	Alistipes	Alistipes	K21573	16940	NODE_34_length_28899_cov_14_549022	None	TonB-dependent starch-binding outer membrane protein SusC
279	Alistipes	Alistipes	K21573	33360	NODE_1087_length_5672_cov_15_327043	None	TonB-dependent starch-binding outer membrane protein SusC
280	Alistipes	Alistipes	K21573	5330	NODE_42_length_26581_cov_13_327264	None	TonB-dependent starch-binding outer membrane protein SusC
281	Alistipes	Alistipes	K21573	12082	NODE_66_length_22085_cov_13_129006	None	TonB-dependent starch-binding outer membrane protein SusC
282	Alistipes	Alistipes	K21573	19189	NODE_4233_length_2733_cov_15_626587	None	TonB-dependent starch-binding outer membrane protein SusC
283	Alistipes	Alistipes	K01726	19194	NODE_208_length_12373_cov_10_419955	None	gamma-carbonic anhydrase [EC:4.2.1.-]
284	Alistipes	Alistipes	K04077	19207	NODE_224_length_12024_cov_14_055811	None	chaperonin GroEL
285	Alistipes	Alistipes	K07733	19201	NODE_1271_length_5197_cov_17_478219	None	prophage regulatory protein
286	Alistipes	Alistipes	K06006	19191	NODE_208_length_12373_cov_10_419955	None	periplasmic protein CpxP/Spy
287	Alistipes	Alistipes	K07263	6342	NODE_566_length_7747_cov_9_647036	None	zinc protease [EC:3.4.24.-]
288	Alistipes	Alistipes	K07263	9609	NODE_69_length_21914_cov_11_394940	None	zinc protease [EC:3.4.24.-]
289	Alistipes	Alistipes	K07263	3370	NODE_16_length_41167_cov_11_487741	None	zinc protease [EC:3.4.24.-]
290	Alistipes	Alistipes	K07263	40014	NODE_5_length_63037_cov_12_914563	None	zinc protease [EC:3.4.24.-]
291	Alistipes	Alistipes	K07263	38173	NODE_129_length_15659_cov_18_571264	None	zinc protease [EC:3.4.24.-]
292	Alistipes	Alistipes	K03629	3352	NODE_46_length_25729_cov_14_633403	None	DNA replication and repair protein RecF
293	Alistipes	Alistipes	K07705	3402	NODE_16_length_41167_cov_11_487741	None	two-component system, LytTR family, response regulator LytT
294	Alistipes	Alistipes	K01239	3383	NODE_16_length_41167_cov_11_487741	None	purine nucleosidase [EC:3.2.2.1]
295	Alistipes	Alistipes	K08591	3399	NODE_16_length_41167_cov_11_487741	None	acyl phosphate:glycerol-3-phosphate acyltransferase [EC:2.3.1.275]
296	Alistipes	Alistipes	K03565	3379	NODE_16_length_41167_cov_11_487741	None	regulatory protein
297	Alistipes	Alistipes	K06187	3416	NODE_449_length_8623_cov_13_258403	None	recombination protein RecR
298	Alistipes	Alistipes	K02493	3378	NODE_16_length_41167_cov_11_487741	None	release factor glutamine methyltransferase [EC:2.1.1.297]
299	Alistipes	Alistipes	K06861	3375	NODE_16_length_41167_cov_11_487741	None	lipopolysaccharide export system ATP-binding protein [EC:3.6.3.-]
300	Alistipes	Alistipes	K01883	3347	NODE_46_length_25729_cov_14_633403	None	cysteinyl-tRNA synthetase [EC:6.1.1.16]
301	Alistipes	Alistipes	K15789	3420	NODE_449_length_8623_cov_13_258403	None	threonine 3-dehydrogenase [EC:1.1.1.103]
302	Alistipes	Alistipes	K21572	35520	NODE_60_length_23542_cov_14_297569	None	starch-binding outer membrane protein, SusD/RagB family
303	Alistipes	Alistipes	K21572	24164	NODE_29_length_30537_cov_15_249820	None	starch-binding outer membrane protein, SusD/RagB family
304	Alistipes	Alistipes	K21572	31463	NODE_549_length_7821_cov_16_085115	None	starch-binding outer membrane protein, SusD/RagB family
305	Alistipes	Alistipes	K21572	3340	NODE_46_length_25729_cov_14_633403	None	starch-binding outer membrane protein, SusD/RagB family
306	Alistipes	Alistipes	K21572	25805	NODE_32_length_29095_cov_14_501618	None	starch-binding outer membrane protein, SusD/RagB family
307	Alistipes	Alistipes	K21572	16941	NODE_34_length_28899_cov_14_549022	None	starch-binding outer membrane protein, SusD/RagB family
308	Alistipes	Alistipes	K21572	33359	NODE_1087_length_5672_cov_15_327043	None	starch-binding outer membrane protein, SusD/RagB family
309	Alistipes	Alistipes	K21572	5331	NODE_42_length_26581_cov_13_327264	None	starch-binding outer membrane protein, SusD/RagB family
310	Alistipes	Alistipes	K21572	12083	NODE_66_length_22085_cov_13_129006	None	starch-binding outer membrane protein, SusD/RagB family
311	Alistipes	Alistipes	K02426	3396	NODE_16_length_41167_cov_11_487741	None	cysteine desulfuration protein SufE
312	Alistipes	Alistipes	K05770	3387	NODE_16_length_41167_cov_11_487741	None	translocator protein
313	Alistipes	Alistipes	K05770	14541	NODE_7_length_55443_cov_13_641348	None	translocator protein
314	Alistipes	Alistipes	K03668	3381	NODE_16_length_41167_cov_11_487741	None	heat shock protein HslJ
315	Alistipes	Alistipes	K03654	29554	NODE_2_length_102688_cov_13_155983	None	ATP-dependent DNA helicase RecQ [EC:3.6.4.12]
316	Alistipes	Alistipes	K03654	3374	NODE_16_length_41167_cov_11_487741	None	ATP-dependent DNA helicase RecQ [EC:3.6.4.12]
317	Alistipes	Alistipes	K00639	3357	NODE_46_length_25729_cov_14_633403	None	glycine C-acetyltransferase [EC:2.3.1.29]
318	Alistipes	Alistipes	K03522	3369	NODE_417_length_8936_cov_9_262808	None	electron transfer flavoprotein alpha subunit
[truncated: 19,208 more rows]

## Sheet: overall-metabolism_enriched
KEGG_MODULE	enrichment_score	unadjusted_p_value	adjusted_q_value	associated_groups	accession	sample_ids	p_control	N_control	p_treatment	N_treatment
UDP-L-FucNAm biosynthesis	7.36674	0.00664412	0.38849	treatment	M00923	Muribaculaceae,Paramuribaculum_sp001689565	0	13	0.5	4
Biotin biosynthesis, BioW pathway, pimelate => pimeloyl-CoA => biotin	3.76749	0.0522581	0.461418	treatment	M00577	Muribaculaceae,Paramuribaculum_sp001689565,UBA7173_sp001915385	0.0769231	13	0.5	4
Biotin biosynthesis, pimeloyl-ACP/CoA => biotin	3.76749	0.0522581	0.461418	treatment	M00123	Muribaculaceae,Paramuribaculum_sp001689565,UBA7173_sp001915385	0.0769231	13	0.5	4
NADH:quinone oxidoreductase, prokaryotes	3.76749	0.0522581	0.461418	treatment	M00144	Muribaculaceae,Paramuribaculum_sp001689565,UBA7173_sp001915385	0.0769231	13	0.5	4
Pyrimidine ribonucleotide biosynthesis, UMP => UDP/UTP,CDP/CTP	3.76749	0.0522581	0.461418	treatment	M00052	Muribaculaceae,Paramuribaculum_sp001689565,UBA7173_sp001915385	0.0769231	13	0.5	4
Methionine biosynthesis, apartate => homoserine => methionine	3.61103	0.0573977	0.461418	treatment	M00017	CAG_56_sp004793585_REP1,Clostridia,Kineothrix_sp000403275,Muribaculaceae,Paramuribaculum_sp001689565,UBA3282	0.230769	13	0.75	4
Semi-phosphorylative Entner-Doudoroff pathway, gluconate => glycerate-3P	3.61103	0.0573977	0.461418	control	M00308	Acetatifactor_sp011959105,Alistipes,CAG_56_sp004793585_REP1,COE1_sp002358575,COE1_sp009774375,Clostridia,Dubosiella_sp004793885,Muribaculaceae,RACS_045_sp013316135,UBA3282,UMGS1004_sp003343805	0.769231	13	0.25	4
Thiamine biosynthesis, archaea, AIR (+ NAD+) => TMP/TPP	3.45316	0.0631309	0.461418	treatment	M00896	Paramuribaculum_sp001689565	0	13	0.25	4
D-Galacturonate degradation (bacteria), D-galacturonate => pyruvate + D-glyceraldehyde 3P	2.85315	0.0911952	0.498675	control	M00631	Acetatifactor_sp011959105,Alistipes,COE1_sp002358575,COE1_sp009774375,Dubosiella_sp004793885,UBA3282	0.461538	13	0	4
D-Glucuronate degradation, D-glucuronate => pyruvate + D-glyceraldehyde 3P	2.47062	0.115992	0.498675	control	M00061	Acetatifactor_sp011959105,Alistipes,COE1_sp002358575,COE1_sp009774375,Clostridia,Dubosiella_sp004793885,Muribaculaceae,RACS_045_sp013316135,UBA3282,UMGS1004_sp003343805	0.692308	13	0.25	4
dTDP-L-rhamnose biosynthesis	2.17949	0.139861	0.498675	treatment	M00793	Acetatifactor_sp011959105,Alistipes,CAG_56_sp004793585_REP1,COE1_sp002358575,COE1_sp009774375,Clostridia,Kineothrix_sp000403275,Muribaculaceae,Paramuribaculum_sp001689565,UBA11940_sp013316055,UBA3282,UBA7173_sp001915385	0.615385	13	1	4
C10-C20 isoprenoid biosynthesis, archaea	2.03698	0.153514	0.498675	treatment	M00365	Alistipes,Muribaculaceae,Paramuribaculum_sp001689565,UBA7173_sp001915385	0.153846	13	0.5	4
C10-C20 isoprenoid biosynthesis, bacteria	2.03698	0.153514	0.498675	treatment	M00364	Alistipes,Muribaculaceae,Paramuribaculum_sp001689565,UBA7173_sp001915385	0.153846	13	0.5	4
CAM (Crassulacean acid metabolism), light	2.03698	0.153514	0.498675	treatment	M00169	Alistipes,Muribaculaceae,Paramuribaculum_sp001689565,UBA7173_sp001915385	0.153846	13	0.5	4
KDO2-lipid A biosynthesis, Raetz pathway, non-LpxL-LpxM type	2.03698	0.153514	0.498675	treatment	M00866	Alistipes,Muribaculaceae,Paramuribaculum_sp001689565,UBA7173_sp001915385	0.153846	13	0.5	4
Pantothenate biosynthesis, valine/L-aspartate => pantothenate	2.03698	0.153514	0.498675	treatment	M00119	Alistipes,Muribaculaceae,Paramuribaculum_sp001689565,UBA7173_sp001915385	0.153846	13	0.5	4
Riboflavin biosynthesis, plants and bacteria, GTP => riboflavin/FMN/FAD	2.03698	0.153514	0.498675	treatment	M00125	CAG_56_sp004793585_REP1,Muribaculaceae,Paramuribaculum_sp001689565,UBA7173_sp001915385	0.153846	13	0.5	4
Succinate dehydrogenase, prokaryotes	2.03698	0.153514	0.498675	treatment	M00149	Alistipes,Muribaculaceae,Paramuribaculum_sp001689565,UBA7173_sp001915385	0.153846	13	0.5	4
C1-unit interconversion, prokaryotes	1.63916	0.200441	0.507916	control	M00140	Acetatifactor_sp011959105,CAG_56_sp004793585_REP1,COE1_sp002358575,COE1_sp009774375,Clostridia,Kineothrix_sp000403275,RACS_045_sp013316135,UBA3282,UMGS1004_sp003343805	0.615385	13	0.25	4
UDP-N-acetyl-D-glucosamine biosynthesis, prokaryotes, glucose => UDP-GlcNAc	1.63916	0.200441	0.507916	control	M00909	Acetatifactor_sp011959105,COE1_sp002358575,COE1_sp009774375,Clostridia,Dubosiella_sp004793885,Kineothrix_sp000403275,RACS_045_sp013316135,UBA3282,UMGS1004_sp003343805	0.615385	13	0.25	4
Fatty acid biosynthesis, initiation	1.60947	0.204567	0.507916	control	M00082	Acetatifactor_sp011959105,CAG_56_sp004793585_REP1,COE1_sp002358575,COE1_sp009774375	0.307692	13	0	4
Multidrug resistance, efflux pump MepA	1.60947	0.204567	0.507916	control	M00705	Acetatifactor_sp011959105,COE1_sp002358575,COE1_sp009774375,Dubosiella_sp004793885	0.307692	13	0	4
Adenine ribonucleotide biosynthesis, IMP => ADP,ATP	1.12088	0.289729	0.507916	treatment	M00049	Acetatifactor_sp011959105,Alistipes,CAG_56_sp004793585_REP1,COE1_sp002358575,COE1_sp009774375,Clostridia,Kineothrix_sp000403275,Muribaculaceae,Paramuribaculum_sp001689565,RACS_045_sp013316135,UBA11940_sp013316055,UBA3282,UBA7173_sp001915385,UMGS1004_sp003343805	0.769231	13	1	4
Glycolysis, core module involving three-carbon compounds	1.12088	0.289729	0.507916	treatment	M00002	Acetatifactor_sp011959105,Alistipes,CAG_56_sp004793585_REP1,COE1_sp002358575,COE1_sp009774375,Clostridia,Dubosiella_sp004793885,Kineothrix_sp000403275,Muribaculaceae,Paramuribaculum_sp001689565,UBA11940_sp013316055,UBA3282,UMGS1004_sp003343805,UMGS1994_sp900553945	0.769231	13	1	4
Uridine monophosphate biosynthesis, glutamine (+ PRPP) => UMP	1.12088	0.289729	0.507916	treatment	M00051	Acetatifactor_sp011959105,Alistipes,CAG_56_sp004793585_REP1,COE1_sp002358575,COE1_sp009774375,Clostridia,Dubosiella_sp004793885,Kineothrix_sp000403275,Muribaculaceae,Paramuribaculum_sp001689565,RACS_045_sp013316135,UBA11940_sp013316055,UBA3282,UMGS1004_sp003343805	0.769231	13	1	4
Acylglycerol degradation	1.12088	0.289729	0.507916	control	M00098	Clostridia,RACS_045_sp013316135,UBA3282	0.230769	13	0	4
Siroheme biosynthesis, glutamyl-tRNA => siroheme	1.12088	0.289729	0.507916	control	M00846	Acetatifactor_sp011959105,CAG_56_sp004793585_REP1,Dubosiella_sp004793885	0.230769	13	0	4
Tryptophan biosynthesis, chorismate => tryptophan	1.12088	0.289729	0.507916	control	M00023	COE1_sp002358575,COE1_sp009774375,UBA7173_sp001915385	0.230769	13	0	4
Vancomycin resistance, D-Ala-D-Ser type	1.12088	0.289729	0.507916	control	M00652	Acetatifactor_sp011959105,COE1_sp002358575,COE1_sp009774375	0.230769	13	0	4
Glycogen degradation, glycogen => glucose-6P	1.06795	0.301409	0.507916	control	M00855	Acetatifactor_sp011959105,CAG_56_sp004793585_REP1,COE1_sp002358575,COE1_sp009774375,Clostridia,Dubosiella_sp004793885,Kineothrix_sp000403275,Muribaculaceae,RACS_045_sp013316135,UBA3282,UBA7173_sp001915385,UMGS1004_sp003343805	0.769231	13	0.5	4
Histidine biosynthesis, PRPP => histidine	1.06795	0.301409	0.507916	control	M00026	Acetatifactor_sp011959105,CAG_56_sp004793585_REP1,COE1_sp002358575,COE1_sp009774375,Clostridia,Dubosiella_sp004793885,Kineothrix_sp000403275,Muribaculaceae,RACS_045_sp013316135,UBA3282,UBA7173_sp001915385,UMGS1004_sp003343805	0.769231	13	0.5	4
Arginine biosynthesis, ornithine => arginine	1.02164	0.312131	0.507916	control	M00844	CAG_56_sp004793585_REP1,COE1_sp002358575,COE1_sp009774375,Clostridia,Kineothrix_sp000403275,RACS_045_sp013316135,UBA3282,UMGS1004_sp003343805	0.538462	13	0.25	4
Proline biosynthesis, glutamate => proline	1.02164	0.312131	0.507916	control	M00015	Acetatifactor_sp011959105,COE1_sp002358575,COE1_sp009774375,Clostridia,Dubosiella_sp004793885,Kineothrix_sp000403275,UBA3282,UBA7173_sp001915385	0.538462	13	0.25	4
Tetrahydrofolate biosynthesis, GTP => THF	1.02164	0.312131	0.507916	control	M00126	Acetatifactor_sp011959105,Alistipes,CAG_56_sp004793585_REP1,Clostridia,Muribaculaceae,RACS_045_sp013316135,UBA3282,UBA7173_sp001915385	0.538462	13	0.25	4
Galactose degradation, Leloir pathway, galactose => alpha-D-glucose-1P	1.02164	0.312131	0.507916	treatment	M00632	Acetatifactor_sp011959105,Alistipes,CAG_56_sp004793585_REP1,Clostridia,Kineothrix_sp000403275,Muribaculaceae,Paramuribaculum_sp001689565,UBA3282,UBA7173_sp001915385	0.461538	13	0.75	4
Pentose phosphate pathway, non-oxidative phase, fructose 6P => ribose 5P	0.8827	0.347463	0.507916	control	M00007	Acetatifactor_sp011959105,Alistipes,CAG_56_sp004793585_REP1,COE1_sp002358575,COE1_sp009774375,Clostridia,Dubosiella_sp004793885,Kineothrix_sp000403275,Muribaculaceae,Paramuribaculum_sp001689565,RACS_045_sp013316135,UBA3282,UBA7173_sp001915385,UMGS1004_sp003343805,UMGS1994_sp900553945	0.923077	13	0.75	4
KDO2-lipid A biosynthesis, Raetz pathway, LpxL-LpxM type	0.8827	0.347463	0.507916	treatment	M00060	Alistipes,Muribaculaceae	0.0769231	13	0.25	4
Propanoyl-CoA metabolism, propanoyl-CoA => succinyl-CoA	0.8827	0.347463	0.507916	treatment	M00741	Alistipes,Muribaculaceae	0.0769231	13	0.25	4
Pyridoxal-P biosynthesis, R5P + glyceraldehyde-3P + glutamine => pyridoxal-P	0.8827	0.347463	0.507916	treatment	M00916	CAG_56_sp004793585_REP1,Kineothrix_sp000403275	0.0769231	13	0.25	4
Thiamine biosynthesis, prokaryotes, AIR (+ DXP/tyrosine) => TMP/TPP	0.8827	0.347463	0.507916	treatment	M00127	CAG_56_sp004793585_REP1,Paramuribaculum_sp001689565	0.0769231	13	0.25	4
Glycolysis (Embden-Meyerhof pathway), glucose => pyruvate	0.697436	0.403646	0.513081	treatment	M00001	Acetatifactor_sp011959105,Alistipes,CAG_56_sp004793585_REP1,COE1_sp002358575,COE1_sp009774375,Clostridia,Dubosiella_sp004793885,Kineothrix_sp000403275,Muribaculaceae,Paramuribaculum_sp001689565,RACS_045_sp013316135,UBA11940_sp013316055,UBA3282,UMGS1004_sp003343805,UMGS1994_sp900553945	0.846154	13	1	4
Inosine monophosphate biosynthesis, PRPP + glutamine => IMP	0.697436	0.403646	0.513081	treatment	M00048	Acetatifactor_sp011959105,Alistipes,CAG_56_sp004793585_REP1,COE1_sp002358575,COE1_sp009774375,Clostridia,Dubosiella_sp004793885,Kineothrix_sp000403275,Muribaculaceae,Paramuribaculum_sp001689565,RACS_045_sp013316135,UBA11940_sp013316055,UBA3282,UBA7173_sp001915385,UMGS1004_sp003343805	0.846154	13	1	4
Shikimate pathway, phosphoenolpyruvate + erythrose-4P => chorismate	0.697436	0.403646	0.513081	treatment	M00022	Acetatifactor_sp011959105,Alistipes,CAG_56_sp004793585_REP1,COE1_sp002358575,COE1_sp009774375,Clostridia,Dubosiella_sp004793885,Kineothrix_sp000403275,Muribaculaceae,Paramuribaculum_sp001689565,RACS_045_sp013316135,UBA11940_sp013316055,UBA3282,UBA7173_sp001915385,UMGS1004_sp003343805	0.846154	13	1	4
Lipoic acid biosynthesis, plants and bacteria, octanoyl-ACP => dihydrolipoyl-E2/H	0.697436	0.403646	0.513081	control	M00881	Alistipes,UBA7173_sp001915385	0.153846	13	0	4
Pentose phosphate pathway (Pentose phosphate cycle)	0.697436	0.403646	0.513081	control	M00004	Acetatifactor_sp011959105,COE1_sp009774375	0.153846	13	0	4
Polyamine biosynthesis, arginine => agmatine => putrescine => spermidine	0.697436	0.403646	0.513081	control	M00133	Acetatifactor_sp011959105,COE1_sp009774375	0.153846	13	0	4
Phosphatidylethanolamine (PE) biosynthesis, PA => PS => PE	0.495339	0.481555	0.582119	treatment	M00093	Alistipes,CAG_56_sp004793585_REP1,Muribaculaceae,Paramuribaculum_sp001689565,UBA7173_sp001915385,UMGS1004_sp003343805	0.307692	13	0.5	4
Glycogen biosynthesis, glucose-1P => glycogen/starch	0.495339	0.481555	0.582119	control	M00854	Acetatifactor_sp011959105,CAG_56_sp004793585_REP1,COE1_sp002358575,COE1_sp009774375,Clostridia,Dubosiella_sp004793885,Kineothrix_sp000403275,RACS_045_sp013316135,UBA11940_sp013316055,UBA3282,UMGS1004_sp003343805	0.692308	13	0.5	4
PRPP biosynthesis, ribose 5P => PRPP	0.326932	0.567471	0.582119	treatment	M00005	Acetatifactor_sp011959105,Alistipes,CAG_56_sp004793585_REP1,COE1_sp002358575,COE1_sp009774375,Clostridia,Dubosiella_sp004793885,Kineothrix_sp000403275,Muribaculaceae,Paramuribaculum_sp001689565,RACS_045_sp013316135,UBA11940_sp013316055,UBA3282,UBA7173_sp001915385,UMGS1004_sp003343805,UMGS1994_sp900553945	0.923077	13	1	4
Acetogen	0.326932	0.567471	0.582119	control	M00618	CAG_56_sp004793585_REP1	0.0769231	13	0	4
ADP-L-glycero-D-manno-heptose biosynthesis	0.326932	0.567471	0.582119	control	M00064	COE1_sp002358575	0.0769231	13	0	4
Cobalamin biosynthesis, anaerobic, uroporphyrinogen III => sirohydrochlorin => cobyrinate a,c-diamide	0.326932	0.567471	0.582119	control	M00924	CAG_56_sp004793585_REP1	0.0769231	13	0	4
Lysine biosynthesis, acetyl-DAP pathway, aspartate => lysine	0.326932	0.567471	0.582119	control	M00525	UBA3282	0.0769231	13	0	4
Nucleotide sugar biosynthesis, glucose => UDP-glucose	0.326932	0.567471	0.582119	control	M00549	RACS_045_sp013316135	0.0769231	13	0	4
Phosphatidylcholine (PC) biosynthesis, PE => PC	0.326932	0.567471	0.582119	control	M00091	CAG_56_sp004793585_REP1	0.0769231	13	0	4
Reductive acetyl-CoA pathway (Wood-Ljungdahl pathway)	0.326932	0.567471	0.582119	control	M00377	CAG_56_sp004793585_REP1	0.0769231	13	0	4
V/A-type ATPase, prokaryotes	0.326932	0.567471	0.582119	control	M00159	RACS_045_sp013316135	0.0769231	13	0	4
Cysteine biosynthesis, serine => cysteine	0.242716	0.622251	0.586241	treatment	M00021	CAG_56_sp004793585_REP1,COE1_sp002358575,COE1_sp009774375,Clostridia,Kineothrix_sp000403275,Muribaculaceae,Paramuribaculum_sp001689565,RACS_045_sp013316135,UBA3282,UBA7173_sp001915385,UMGS1004_sp003343805	0.615385	13	0.75	4
F-type ATPase, prokaryotes and chloroplasts	0.242716	0.622251	0.586241	treatment	M00157	Acetatifactor_sp011959105,CAG_56_sp004793585_REP1,COE1_sp002358575,COE1_sp009774375,Clostridia,Dubosiella_sp004793885,Kineothrix_sp000403275,Muribaculaceae,Paramuribaculum_sp001689565,UBA3282,UBA7173_sp001915385	0.615385	13	0.75	4
Citrate cycle, second carbon oxidation, 2-oxoglutarate => oxaloacetate	0.194597	0.659118	0.586241	treatment	M00011	Alistipes,Muribaculaceae,UBA7173_sp001915385	0.153846	13	0.25	4
CMP-KDO biosynthesis	0.194597	0.659118	0.586241	treatment	M00063	Alistipes,Muribaculaceae,UBA7173_sp001915385	0.153846	13	0.25	4
Cobalamin biosynthesis, cobyrinate a,c-diamide => cobalamin	0.194597	0.659118	0.586241	treatment	M00122	Alistipes,CAG_56_sp004793585_REP1,Muribaculaceae	0.153846	13	0.25	4
Coenzyme A biosynthesis, pantothenate => CoA	0.194597	0.659118	0.586241	control	M00120	Acetatifactor_sp011959105,Alistipes,CAG_56_sp004793585_REP1,COE1_sp002358575,COE1_sp009774375,Clostridia,Dubosiella_sp004793885,Kineothrix_sp000403275,Muribaculaceae,RACS_045_sp013316135,UBA11940_sp013316055,UBA3282,UBA7173_sp001915385,UMGS1004_sp003343805	0.846154	13	0.75	4
Guanine ribonucleotide biosynthesis IMP => GDP,GTP	0.194597	0.659118	0.586241	control	M00050	Acetatifactor_sp011959105,Alistipes,CAG_56_sp004793585_REP1,COE1_sp002358575,COE1_sp009774375,Clostridia,Dubosiella_sp004793885,Kineothrix_sp000403275,Muribaculaceae,Paramuribaculum_sp001689565,RACS_045_sp013316135,UBA3282,UBA7173_sp001915385,UMGS1004_sp003343805	0.846154	13	0.75	4
Methionine degradation	0.194597	0.659118	0.586241	treatment	M00035	Alistipes,CAG_56_sp004793585_REP1,Kineothrix_sp000403275	0.153846	13	0.25	4
beta-Oxidation, acyl-CoA synthesis	0.168132	0.681777	0.586241	control	M00086	Alistipes,CAG_56_sp004793585_REP1,COE1_sp002358575,COE1_sp009774375,Dubosiella_sp004793885,Muribaculaceae,Paramuribaculum_sp001689565,RACS_045_sp013316135,UBA7173_sp001915385,UMGS1994_sp900553945	0.615385	13	0.5	4
NAD biosynthesis, aspartate => quinolinate => NAD	0.168132	0.681777	0.586241	treatment	M00115	Alistipes,COE1_sp002358575,COE1_sp009774375,Muribaculaceae,Paramuribaculum_sp001689565,UBA7173_sp001915385,UMGS1004_sp003343805	0.384615	13	0.5	4
Serine biosynthesis, glycerate-3P => serine	0.168132	0.681777	0.586241	treatment	M00020	Acetatifactor_sp011959105,Alistipes,COE1_sp002358575,COE1_sp009774375,Muribaculaceae,Paramuribaculum_sp001689565,UBA7173_sp001915385	0.384615	13	0.5	4
Phosphate acetyltransferase-acetate kinase pathway, acetyl-CoA => acetate	0.0490385	0.824745	0.660601	control	M00579	CAG_56_sp004793585_REP1,COE1_sp002358575,Kineothrix_sp000403275,UBA3282,UMGS1994_sp900553945	0.307692	13	0.25	4
Gluconeogenesis, oxaloacetate => fructose-6P	0.0490385	0.824745	0.660601	treatment	M00003	Acetatifactor_sp011959105,Alistipes,CAG_56_sp004793585_REP1,COE1_sp002358575,COE1_sp009774375,Clostridia,Kineothrix_sp000403275,Muribaculaceae,Paramuribaculum_sp001689565,RACS_045_sp013316135,UBA3282,UMGS1004_sp003343805	0.692308	13	0.75	4
Lysine biosynthesis, DAP aminotransferase pathway, aspartate => lysine	0.0490385	0.824745	0.660601	treatment	M00527	Acetatifactor_sp011959105,CAG_56_sp004793585_REP1,COE1_sp002358575,COE1_sp009774375,Clostridia,Kineothrix_sp000403275,Muribaculaceae,Paramuribaculum_sp001689565,RACS_045_sp013316135,UBA3282,UBA7173_sp001915385,UMGS1004_sp003343805	0.692308	13	0.75	4
Lysine biosynthesis, DAP dehydrogenase pathway, aspartate => lysine	0.0490385	0.824745	0.660601	treatment	M00526	Acetatifactor_sp011959105,CAG_56_sp004793585_REP1,COE1_sp002358575,COE1_sp009774375,Clostridia,Kineothrix_sp000403275,Muribaculaceae,Paramuribaculum_sp001689565,RACS_045_sp013316135,UBA3282,UBA7173_sp001915385,UMGS1004_sp003343805	0.692308	13	0.75	4
Threonine biosynthesis, aspartate => homoserine => threonine	0.0490385	0.824745	0.660601	treatment	M00018	Acetatifactor_sp011959105,CAG_56_sp004793585_REP1,COE1_sp002358575,COE1_sp009774375,Clostridia,Dubosiella_sp004793885,Kineothrix_sp000403275,Muribaculaceae,Paramuribaculum_sp001689565,RACS_045_sp013316135,UBA3282,UMGS1004_sp003343805	0.692308	13	0.75	4
Fatty acid biosynthesis, elongation	0.0181624	0.892795	0.668	treatment	M00083	Acetatifactor_sp011959105,Alistipes,CAG_56_sp004793585_REP1,COE1_sp002358575,COE1_sp009774375,Muribaculaceae,Paramuribaculum_sp001689565,UMGS1994_sp900553945	0.461538	13	0.5	4
Lysine biosynthesis, succinyl-DAP pathway, aspartate => lysine	0.0181624	0.892795	0.668	control	M00016	CAG_56_sp004793585_REP1,COE1_sp002358575,COE1_sp009774375,Clostridia,Kineothrix_sp000403275,Muribaculaceae,RACS_045_sp013316135,UBA3282,UMGS1004_sp003343805	0.538462	13	0.5	4
Ornithine biosynthesis, glutamate => ornithine	0.0181624	0.892795	0.668	control	M00028	Acetatifactor_sp011959105,CAG_56_sp004793585_REP1,COE1_sp002358575,COE1_sp009774375,Clostridia,Kineothrix_sp000403275,Muribaculaceae,RACS_045_sp013316135,UBA3282	0.538462	13	0.5	4
C5 isoprenoid biosynthesis, non-mevalonate pathway	0.00628703	0.936801	0.668	control	M00096	Acetatifactor_sp011959105,Alistipes,CAG_56_sp004793585_REP1,COE1_sp002358575,COE1_sp009774375,Clostridia,Kineothrix_sp000403275,Muribaculaceae,Paramuribaculum_sp001689565,RACS_045_sp013316135,UBA3282,UBA7173_sp001915385,UMGS1004_sp003343805	0.769231	13	0.75	4
Isoleucine biosynthesis, threonine => 2-oxobutanoate => isoleucine	0.00628703	0.936801	0.668	control	M00570	Acetatifactor_sp011959105,CAG_56_sp004793585_REP1,COE1_sp002358575,COE1_sp009774375,Clostridia,Dubosiella_sp004793885,Kineothrix_sp000403275,Muribaculaceae,Paramuribaculum_sp001689565,RACS_045_sp013316135,UBA3282,UBA7173_sp001915385,UMGS1004_sp003343805	0.769231	13	0.75	4
Leucine biosynthesis, 2-oxoisovalerate => 2-oxoisocaproate	0.00628703	0.936801	0.668	control	M00432	Acetatifactor_sp011959105,CAG_56_sp004793585_REP1,COE1_sp002358575,COE1_sp009774375,Clostridia,Dubosiella_sp004793885,Kineothrix_sp000403275,Muribaculaceae,Paramuribaculum_sp001689565,RACS_045_sp013316135,UBA3282,UBA7173_sp001915385,UMGS1004_sp003343805	0.769231	13	0.75	4
Pyruvate oxidation, pyruvate => acetyl-CoA	0.00628703	0.936801	0.668	control	M00307	Acetatifactor_sp011959105,Alistipes,CAG_56_sp004793585_REP1,COE1_sp002358575,COE1_sp009774375,Dubosiella_sp004793885,Muribaculaceae,Paramuribaculum_sp001689565,RACS_045_sp013316135,UBA11940_sp013316055,UBA7173_sp001915385,UMGS1004_sp003343805,UMGS1994_sp900553945	0.769231	13	0.75	4
Valine/isoleucine biosynthesis, pyruvate => valine / 2-oxobutanoate => isoleucine	0.00628703	0.936801	0.668	control	M00019	Acetatifactor_sp011959105,CAG_56_sp004793585_REP1,COE1_sp002358575,COE1_sp009774375,Clostridia,Dubosiella_sp004793885,Kineothrix_sp000403275,Muribaculaceae,Paramuribaculum_sp001689565,RACS_045_sp013316135,UBA3282,UBA7173_sp001915385,UMGS1004_sp003343805	0.769231	13	0.75	4
beta-Lactam resistance, Bla system	0.00628703	0.936801	0.668	treatment	M00627	Alistipes,CAG_56_sp004793585_REP1,Paramuribaculum_sp001689565,UBA7173_sp001915385	0.230769	13	0.25	4

## Sheet: Acetatifactor_sp011959105-enric
KEGG_MODULE	enrichment_score	unadjusted_p_value	adjusted_q_value	associated_groups	accession	sample_ids	p_control	N_control	p_test	N_test
Pentose phosphate pathway (Pentose phosphate cycle)	7.96885	0.00475893	0.132747	test	M00004	Acetatifactor_sp011959105,COE1_sp009774375	0.0625	16	1	1
Polyamine biosynthesis, arginine => agmatine => putrescine => spermidine	7.96885	0.00475893	0.132747	test	M00133	Acetatifactor_sp011959105,COE1_sp009774375	0.0625	16	1	1
Siroheme biosynthesis, glutamyl-tRNA => siroheme	4.95833	0.0259652	0.362142	test	M00846	Acetatifactor_sp011959105,CAG_56_sp004793585_REP1,Dubosiella_sp004793885	0.125	16	1	1
Vancomycin resistance, D-Ala-D-Ser type	4.95833	0.0259652	0.362142	test	M00652	Acetatifactor_sp011959105,COE1_sp002358575,COE1_sp009774375	0.125	16	1	1
Fatty acid biosynthesis, initiation	3.45313	0.0631323	0.541995	test	M00082	Acetatifactor_sp011959105,CAG_56_sp004793585_REP1,COE1_sp002358575,COE1_sp009774375	0.1875	16	1	1
Multidrug resistance, efflux pump MepA	3.45313	0.0631323	0.541995	test	M00705	Acetatifactor_sp011959105,COE1_sp002358575,COE1_sp009774375,Dubosiella_sp004793885	0.1875	16	1	1
D-Galacturonate degradation (bacteria), D-galacturonate => pyruvate + D-glyceraldehyde 3P	1.94795	0.162808	0.541995	test	M00631	Acetatifactor_sp011959105,Alistipes,COE1_sp002358575,COE1_sp009774375,Dubosiella_sp004793885,UBA3282	0.3125	16	1	1
Cysteine biosynthesis, serine => cysteine	1.94795	0.162808	0.541995	control	M00021	CAG_56_sp004793585_REP1,COE1_sp002358575,COE1_sp009774375,Clostridia,Kineothrix_sp000403275,Muribaculaceae,Paramuribaculum_sp001689565,RACS_045_sp013316135,UBA3282,UBA7173_sp001915385,UMGS1004_sp003343805	0.6875	16	0	1
Serine biosynthesis, glycerate-3P => serine	1.51786	0.217943	0.541995	test	M00020	Acetatifactor_sp011959105,Alistipes,COE1_sp002358575,COE1_sp009774375,Muribaculaceae,Paramuribaculum_sp001689565,UBA7173_sp001915385	0.375	16	1	1
beta-Oxidation, acyl-CoA synthesis	1.51786	0.217943	0.541995	control	M00086	Alistipes,CAG_56_sp004793585_REP1,COE1_sp002358575,COE1_sp009774375,Dubosiella_sp004793885,Muribaculaceae,Paramuribaculum_sp001689565,RACS_045_sp013316135,UBA7173_sp001915385,UMGS1994_sp900553945	0.625	16	0	1
Lysine biosynthesis, succinyl-DAP pathway, aspartate => lysine	1.19531	0.274261	0.541995	control	M00016	CAG_56_sp004793585_REP1,COE1_sp002358575,COE1_sp009774375,Clostridia,Kineothrix_sp000403275,Muribaculaceae,RACS_045_sp013316135,UBA3282,UMGS1004_sp003343805	0.5625	16	0	1
Fatty acid biosynthesis, elongation	1.19531	0.274261	0.541995	test	M00083	Acetatifactor_sp011959105,Alistipes,CAG_56_sp004793585_REP1,COE1_sp002358575,COE1_sp009774375,Muribaculaceae,Paramuribaculum_sp001689565,UMGS1994_sp900553945	0.4375	16	1	1
Proline biosynthesis, glutamate => proline	1.19531	0.274261	0.541995	test	M00015	Acetatifactor_sp011959105,COE1_sp002358575,COE1_sp009774375,Clostridia,Dubosiella_sp004793885,Kineothrix_sp000403275,UBA3282,UBA7173_sp001915385	0.4375	16	1	1
Tetrahydrofolate biosynthesis, GTP => THF	1.19531	0.274261	0.541995	test	M00126	Acetatifactor_sp011959105,Alistipes,CAG_56_sp004793585_REP1,Clostridia,Muribaculaceae,RACS_045_sp013316135,UBA3282,UBA7173_sp001915385	0.4375	16	1	1
Arginine biosynthesis, ornithine => arginine	0.944445	0.331137	0.541995	control	M00844	CAG_56_sp004793585_REP1,COE1_sp002358575,COE1_sp009774375,Clostridia,Kineothrix_sp000403275,RACS_045_sp013316135,UBA3282,UMGS1004_sp003343805	0.5	16	0	1
C1-unit interconversion, prokaryotes	0.944445	0.331137	0.541995	test	M00140	Acetatifactor_sp011959105,CAG_56_sp004793585_REP1,COE1_sp002358575,COE1_sp009774375,Clostridia,Kineothrix_sp000403275,RACS_045_sp013316135,UBA3282,UMGS1004_sp003343805	0.5	16	1	1
Galactose degradation, Leloir pathway, galactose => alpha-D-glucose-1P	0.944445	0.331137	0.541995	test	M00632	Acetatifactor_sp011959105,Alistipes,CAG_56_sp004793585_REP1,Clostridia,Kineothrix_sp000403275,Muribaculaceae,Paramuribaculum_sp001689565,UBA3282,UBA7173_sp001915385	0.5	16	1	1
Ornithine biosynthesis, glutamate => ornithine	0.944445	0.331137	0.541995	test	M00028	Acetatifactor_sp011959105,CAG_56_sp004793585_REP1,COE1_sp002358575,COE1_sp009774375,Clostridia,Kineothrix_sp000403275,Muribaculaceae,RACS_045_sp013316135,UBA3282	0.5	16	1	1
UDP-N-acetyl-D-glucosamine biosynthesis, prokaryotes, glucose => UDP-GlcNAc	0.944445	0.331137	0.541995	test	M00909	Acetatifactor_sp011959105,COE1_sp002358575,COE1_sp009774375,Clostridia,Dubosiella_sp004793885,Kineothrix_sp000403275,RACS_045_sp013316135,UBA3282,UMGS1004_sp003343805	0.5	16	1	1
D-Glucuronate degradation, D-glucuronate => pyruvate + D-glyceraldehyde 3P	0.74375	0.388462	0.541995	test	M00061	Acetatifactor_sp011959105,Alistipes,COE1_sp002358575,COE1_sp009774375,Clostridia,Dubosiella_sp004793885,Muribaculaceae,RACS_045_sp013316135,UBA3282,UMGS1004_sp003343805	0.5625	16	1	1
NAD biosynthesis, aspartate => quinolinate => NAD	0.74375	0.388462	0.541995	control	M00115	Alistipes,COE1_sp002358575,COE1_sp009774375,Muribaculaceae,Paramuribaculum_sp001689565,UBA7173_sp001915385,UMGS1004_sp003343805	0.4375	16	0	1
Methionine biosynthesis, apartate => homoserine => methionine	0.579546	0.44649	0.541995	control	M00017	CAG_56_sp004793585_REP1,Clostridia,Kineothrix_sp000403275,Muribaculaceae,Paramuribaculum_sp001689565,UBA3282	0.375	16	0	1
Phosphatidylethanolamine (PE) biosynthesis, PA => PS => PE	0.579546	0.44649	0.541995	control	M00093	Alistipes,CAG_56_sp004793585_REP1,Muribaculaceae,Paramuribaculum_sp001689565,UBA7173_sp001915385,UMGS1004_sp003343805	0.375	16	0	1
F-type ATPase, prokaryotes and chloroplasts	0.579546	0.44649	0.541995	test	M00157	Acetatifactor_sp011959105,CAG_56_sp004793585_REP1,COE1_sp002358575,COE1_sp009774375,Clostridia,Dubosiella_sp004793885,Kineothrix_sp000403275,Muribaculaceae,Paramuribaculum_sp001689565,UBA3282,UBA7173_sp001915385	0.625	16	1	1
Glycogen biosynthesis, glucose-1P => glycogen/starch	0.579546	0.44649	0.541995	test	M00854	Acetatifactor_sp011959105,CAG_56_sp004793585_REP1,COE1_sp002358575,COE1_sp009774375,Clostridia,Dubosiella_sp004793885,Kineothrix_sp000403275,RACS_045_sp013316135,UBA11940_sp013316055,UBA3282,UMGS1004_sp003343805	0.625	16	1	1
Semi-phosphorylative Entner-Doudoroff pathway, gluconate => glycerate-3P	0.579546	0.44649	0.541995	test	M00308	Acetatifactor_sp011959105,Alistipes,CAG_56_sp004793585_REP1,COE1_sp002358575,COE1_sp009774375,Clostridia,Dubosiella_sp004793885,Muribaculaceae,RACS_045_sp013316135,UBA3282,UMGS1004_sp003343805	0.625	16	1	1
dTDP-L-rhamnose biosynthesis	0.442709	0.505818	0.541995	test	M00793	Acetatifactor_sp011959105,Alistipes,CAG_56_sp004793585_REP1,COE1_sp002358575,COE1_sp009774375,Clostridia,Kineothrix_sp000403275,Muribaculaceae,Paramuribaculum_sp001689565,UBA11940_sp013316055,UBA3282,UBA7173_sp001915385	0.6875	16	1	1
Gluconeogenesis, oxaloacetate => fructose-6P	0.442709	0.505818	0.541995	test	M00003	Acetatifactor_sp011959105,Alistipes,CAG_56_sp004793585_REP1,COE1_sp002358575,COE1_sp009774375,Clostridia,Kineothrix_sp000403275,Muribaculaceae,Paramuribaculum_sp001689565,RACS_045_sp013316135,UBA3282,UMGS1004_sp003343805	0.6875	16	1	1
Glycogen degradation, glycogen => glucose-6P	0.442709	0.505818	0.541995	test	M00855	Acetatifactor_sp011959105,CAG_56_sp004793585_REP1,COE1_sp002358575,COE1_sp009774375,Clostridia,Dubosiella_sp004793885,Kineothrix_sp000403275,Muribaculaceae,RACS_045_sp013316135,UBA3282,UBA7173_sp001915385,UMGS1004_sp003343805	0.6875	16	1	1
Histidine biosynthesis, PRPP => histidine	0.442709	0.505818	0.541995	test	M00026	Acetatifactor_sp011959105,CAG_56_sp004793585_REP1,COE1_sp002358575,COE1_sp009774375,Clostridia,Dubosiella_sp004793885,Kineothrix_sp000403275,Muribaculaceae,RACS_045_sp013316135,UBA3282,UBA7173_sp001915385,UMGS1004_sp003343805	0.6875	16	1	1
Lysine biosynthesis, DAP aminotransferase pathway, aspartate => lysine	0.442709	0.505818	0.541995	test	M00527	Acetatifactor_sp011959105,CAG_56_sp004793585_REP1,COE1_sp002358575,COE1_sp009774375,Clostridia,Kineothrix_sp000403275,Muribaculaceae,Paramuribaculum_sp001689565,RACS_045_sp013316135,UBA3282,UBA7173_sp001915385,UMGS1004_sp003343805	0.6875	16	1	1
Lysine biosynthesis, DAP dehydrogenase pathway, aspartate => lysine	0.442709	0.505818	0.541995	test	M00526	Acetatifactor_sp011959105,CAG_56_sp004793585_REP1,COE1_sp002358575,COE1_sp009774375,Clostridia,Kineothrix_sp000403275,Muribaculaceae,Paramuribaculum_sp001689565,RACS_045_sp013316135,UBA3282,UBA7173_sp001915385,UMGS1004_sp003343805	0.6875	16	1	1
Threonine biosynthesis, aspartate => homoserine => threonine	0.442709	0.505818	0.541995	test	M00018	Acetatifactor_sp011959105,CAG_56_sp004793585_REP1,COE1_sp002358575,COE1_sp009774375,Clostridia,Dubosiella_sp004793885,Kineothrix_sp000403275,Muribaculaceae,Paramuribaculum_sp001689565,RACS_045_sp013316135,UBA3282,UMGS1004_sp003343805	0.6875	16	1	1
Phosphate acetyltransferase-acetate kinase pathway, acetyl-CoA => acetate	0.442709	0.505818	0.541995	control	M00579	CAG_56_sp004793585_REP1,COE1_sp002358575,Kineothrix_sp000403275,UBA3282,UMGS1994_sp900553945	0.3125	16	0	1
beta-Lactam resistance, Bla system	0.326925	0.567476	0.541995	control	M00627	Alistipes,CAG_56_sp004793585_REP1,Paramuribaculum_sp001689565,UBA7173_sp001915385	0.25	16	0	1
C10-C20 isoprenoid biosynthesis, archaea	0.326925	0.567476	0.541995	control	M00365	Alistipes,Muribaculaceae,Paramuribaculum_sp001689565,UBA7173_sp001915385	0.25	16	0	1
C10-C20 isoprenoid biosynthesis, bacteria	0.326925	0.567476	0.541995	control	M00364	Alistipes,Muribaculaceae,Paramuribaculum_sp001689565,UBA7173_sp001915385	0.25	16	0	1
C5 isoprenoid biosynthesis, non-mevalonate pathway	0.326925	0.567476	0.541995	test	M00096	Acetatifactor_sp011959105,Alistipes,CAG_56_sp004793585_REP1,COE1_sp002358575,COE1_sp009774375,Clostridia,Kineothrix_sp000403275,Muribaculaceae,Paramuribaculum_sp001689565,RACS_045_sp013316135,UBA3282,UBA7173_sp001915385,UMGS1004_sp003343805	0.75	16	1	1
CAM (Crassulacean acid metabolism), light	0.326925	0.567476	0.541995	control	M00169	Alistipes,Muribaculaceae,Paramuribaculum_sp001689565,UBA7173_sp001915385	0.25	16	0	1
Isoleucine biosynthesis, threonine => 2-oxobutanoate => isoleucine	0.326925	0.567476	0.541995	test	M00570	Acetatifactor_sp011959105,CAG_56_sp004793585_REP1,COE1_sp002358575,COE1_sp009774375,Clostridia,Dubosiella_sp004793885,Kineothrix_sp000403275,Muribaculaceae,Paramuribaculum_sp001689565,RACS_045_sp013316135,UBA3282,UBA7173_sp001915385,UMGS1004_sp003343805	0.75	16	1	1
KDO2-lipid A biosynthesis, Raetz pathway, non-LpxL-LpxM type	0.326925	0.567476	0.541995	control	M00866	Alistipes,Muribaculaceae,Paramuribaculum_sp001689565,UBA7173_sp001915385	0.25	16	0	1
Leucine biosynthesis, 2-oxoisovalerate => 2-oxoisocaproate	0.326925	0.567476	0.541995	test	M00432	Acetatifactor_sp011959105,CAG_56_sp004793585_REP1,COE1_sp002358575,COE1_sp009774375,Clostridia,Dubosiella_sp004793885,Kineothrix_sp000403275,Muribaculaceae,Paramuribaculum_sp001689565,RACS_045_sp013316135,UBA3282,UBA7173_sp001915385,UMGS1004_sp003343805	0.75	16	1	1
Pantothenate biosynthesis, valine/L-aspartate => pantothenate	0.326925	0.567476	0.541995	control	M00119	Alistipes,Muribaculaceae,Paramuribaculum_sp001689565,UBA7173_sp001915385	0.25	16	0	1
Pyruvate oxidation, pyruvate => acetyl-CoA	0.326925	0.567476	0.541995	test	M00307	Acetatifactor_sp011959105,Alistipes,CAG_56_sp004793585_REP1,COE1_sp002358575,COE1_sp009774375,Dubosiella_sp004793885,Muribaculaceae,Paramuribaculum_sp001689565,RACS_045_sp013316135,UBA11940_sp013316055,UBA7173_sp001915385,UMGS1004_sp003343805,UMGS1994_sp900553945	0.75	16	1	1
Riboflavin biosynthesis, plants and bacteria, GTP => riboflavin/FMN/FAD	0.326925	0.567476	0.541995	control	M00125	CAG_56_sp004793585_REP1,Muribaculaceae,Paramuribaculum_sp001689565,UBA7173_sp001915385	0.25	16	0	1
Succinate dehydrogenase, prokaryotes	0.326925	0.567476	0.541995	control	M00149	Alistipes,Muribaculaceae,Paramuribaculum_sp001689565,UBA7173_sp001915385	0.25	16	0	1
Valine/isoleucine biosynthesis, pyruvate => valine / 2-oxobutanoate => isoleucine	0.326925	0.567476	0.541995	test	M00019	Acetatifactor_sp011959105,CAG_56_sp004793585_REP1,COE1_sp002358575,COE1_sp009774375,Clostridia,Dubosiella_sp004793885,Kineothrix_sp000403275,Muribaculaceae,Paramuribaculum_sp001689565,RACS_045_sp013316135,UBA3282,UBA7173_sp001915385,UMGS1004_sp003343805	0.75	16	1	1
Adenine ribonucleotide biosynthesis, IMP => ADP,ATP	0.227679	0.633251	0.541995	test	M00049	Acetatifactor_sp011959105,Alistipes,CAG_56_sp004793585_REP1,COE1_sp002358575,COE1_sp009774375,Clostridia,Kineothrix_sp000403275,Muribaculaceae,Paramuribaculum_sp001689565,RACS_045_sp013316135,UBA11940_sp013316055,UBA3282,UBA7173_sp001915385,UMGS1004_sp003343805	0.8125	16	1	1
Coenzyme A biosynthesis, pantothenate => CoA	0.227679	0.633251	0.541995	test	M00120	Acetatifactor_sp011959105,Alistipes,CAG_56_sp004793585_REP1,COE1_sp002358575,COE1_sp009774375,Clostridia,Dubosiella_sp004793885,Kineothrix_sp000403275,Muribaculaceae,RACS_045_sp013316135,UBA11940_sp013316055,UBA3282,UBA7173_sp001915385,UMGS1004_sp003343805	0.8125	16	1	1
Glycolysis, core module involving three-carbon compounds	0.227679	0.633251	0.541995	test	M00002	Acetatifactor_sp011959105,Alistipes,CAG_56_sp004793585_REP1,COE1_sp002358575,COE1_sp009774375,Clostridia,Dubosiella_sp004793885,Kineothrix_sp000403275,Muribaculaceae,Paramuribaculum_sp001689565,UBA11940_sp013316055,UBA3282,UMGS1004_sp003343805,UMGS1994_sp900553945	0.8125	16	1	1
Guanine ribonucleotide biosynthesis IMP => GDP,GTP	0.227679	0.633251	0.541995	test	M00050	Acetatifactor_sp011959105,Alistipes,CAG_56_sp004793585_REP1,COE1_sp002358575,COE1_sp009774375,Clostridia,Dubosiella_sp004793885,Kineothrix_sp000403275,Muribaculaceae,Paramuribaculum_sp001689565,RACS_045_sp013316135,UBA3282,UBA7173_sp001915385,UMGS1004_sp003343805	0.8125	16	1	1
Uridine monophosphate biosynthesis, glutamine (+ PRPP) => UMP	0.227679	0.633251	0.541995	test	M00051	Acetatifactor_sp011959105,Alistipes,CAG_56_sp004793585_REP1,COE1_sp002358575,COE1_sp009774375,Clostridia,Dubosiella_sp004793885,Kineothrix_sp000403275,Muribaculaceae,Paramuribaculum_sp001689565,RACS_045_sp013316135,UBA11940_sp013316055,UBA3282,UMGS1004_sp003343805	0.8125	16	1	1
Acylglycerol degradation	0.227679	0.633251	0.541995	control	M00098	Clostridia,RACS_045_sp013316135,UBA3282	0.1875	16	0	1
Biotin biosynthesis, BioW pathway, pimelate => pimeloyl-CoA => biotin	0.227679	0.633251	0.541995	control	M00577	Muribaculaceae,Paramuribaculum_sp001689565,UBA7173_sp001915385	0.1875	16	0	1
Biotin biosynthesis, pimeloyl-ACP/CoA => biotin	0.227679	0.633251	0.541995	control	M00123	Muribaculaceae,Paramuribaculum_sp001689565,UBA7173_sp001915385	0.1875	16	0	1
Citrate cycle, second carbon oxidation, 2-oxoglutarate => oxaloacetate	0.227679	0.633251	0.541995	control	M00011	Alistipes,Muribaculaceae,UBA7173_sp001915385	0.1875	16	0	1
CMP-KDO biosynthesis	0.227679	0.633251	0.541995	control	M00063	Alistipes,Muribaculaceae,UBA7173_sp001915385	0.1875	16	0	1
Cobalamin biosynthesis, cobyrinate a,c-diamide => cobalamin	0.227679	0.633251	0.541995	control	M00122	Alistipes,CAG_56_sp004793585_REP1,Muribaculaceae	0.1875	16	0	1
Methionine degradation	0.227679	0.633251	0.541995	control	M00035	Alistipes,CAG_56_sp004793585_REP1,Kineothrix_sp000403275	0.1875	16	0	1
NADH:quinone oxidoreductase, prokaryotes	0.227679	0.633251	0.541995	control	M00144	Muribaculaceae,Paramuribaculum_sp001689565,UBA7173_sp001915385	0.1875	16	0	1
Pyrimidine ribonucleotide biosynthesis, UMP => UDP/UTP,CDP/CTP	0.227679	0.633251	0.541995	control	M00052	Muribaculaceae,Paramuribaculum_sp001689565,UBA7173_sp001915385	0.1875	16	0	1
Tryptophan biosynthesis, chorismate => tryptophan	0.227679	0.633251	0.541995	control	M00023	COE1_sp002358575,COE1_sp009774375,UBA7173_sp001915385	0.1875	16	0	1
Glycolysis (Embden-Meyerhof pathway), glucose => pyruvate	0.141667	0.70663	0.541995	test	M00001	Acetatifactor_sp011959105,Alistipes,CAG_56_sp004793585_REP1,COE1_sp002358575,COE1_sp009774375,Clostridia,Dubosiella_sp004793885,Kineothrix_sp000403275,Muribaculaceae,Paramuribaculum_sp001689565,RACS_045_sp013316135,UBA11940_sp013316055,UBA3282,UMGS1004_sp003343805,UMGS1994_sp900553945	0.875	16	1	1
Inosine monophosphate biosynthesis, PRPP + glutamine => IMP	0.141667	0.70663	0.541995	test	M00048	Acetatifactor_sp011959105,Alistipes,CAG_56_sp004793585_REP1,COE1_sp002358575,COE1_sp009774375,Clostridia,Dubosiella_sp004793885,Kineothrix_sp000403275,Muribaculaceae,Paramuribaculum_sp001689565,RACS_045_sp013316135,UBA11940_sp013316055,UBA3282,UBA7173_sp001915385,UMGS1004_sp003343805	0.875	16	1	1
Pentose phosphate pathway, non-oxidative phase, fructose 6P => ribose 5P	0.141667	0.70663	0.541995	test	M00007	Acetatifactor_sp011959105,Alistipes,CAG_56_sp004793585_REP1,COE1_sp002358575,COE1_sp009774375,Clostridia,Dubosiella_sp004793885,Kineothrix_sp000403275,Muribaculaceae,Paramuribaculum_sp001689565,RACS_045_sp013316135,UBA3282,UBA7173_sp001915385,UMGS1004_sp003343805,UMGS1994_sp900553945	0.875	16	1	1
Shikimate pathway, phosphoenolpyruvate + erythrose-4P => chorismate	0.141667	0.70663	0.541995	test	M00022	Acetatifactor_sp011959105,Alistipes,CAG_56_sp004793585_REP1,COE1_sp002358575,COE1_sp009774375,Clostridia,Dubosiella_sp004793885,Kineothrix_sp000403275,Muribaculaceae,Paramuribaculum_sp001689565,RACS_045_sp013316135,UBA11940_sp013316055,UBA3282,UBA7173_sp001915385,UMGS1004_sp003343805	0.875	16	1	1
KDO2-lipid A biosynthesis, Raetz pathway, LpxL-LpxM type	0.141667	0.70663	0.541995	control	M00060	Alistipes,Muribaculaceae	0.125	16	0	1
Lipoic acid biosynthesis, plants and bacteria, octanoyl-ACP => dihydrolipoyl-E2/H	0.141667	0.70663	0.541995	control	M00881	Alistipes,UBA7173_sp001915385	0.125	16	0	1
Propanoyl-CoA metabolism, propanoyl-CoA => succinyl-CoA	0.141667	0.70663	0.541995	control	M00741	Alistipes,Muribaculaceae	0.125	16	0	1
Pyridoxal-P biosynthesis, R5P + glyceraldehyde-3P + glutamine => pyridoxal-P	0.141667	0.70663	0.541995	control	M00916	CAG_56_sp004793585_REP1,Kineothrix_sp000403275	0.125	16	0	1
Thiamine biosynthesis, prokaryotes, AIR (+ DXP/tyrosine) => TMP/TPP	0.141667	0.70663	0.541995	control	M00127	CAG_56_sp004793585_REP1,Paramuribaculum_sp001689565	0.125	16	0	1
UDP-L-FucNAm biosynthesis	0.141667	0.70663	0.541995	control	M00923	Muribaculaceae,Paramuribaculum_sp001689565	0.125	16	0	1
Acetogen	0.0664083	0.79664	0.541995	control	M00618	CAG_56_sp004793585_REP1	0.0625	16	0	1
ADP-L-glycero-D-manno-heptose biosynthesis	0.0664083	0.79664	0.541995	control	M00064	COE1_sp002358575	0.0625	16	0	1
Cobalamin biosynthesis, anaerobic, uroporphyrinogen III => sirohydrochlorin => cobyrinate a,c-diamide	0.0664083	0.79664	0.541995	control	M00924	CAG_56_sp004793585_REP1	0.0625	16	0	1
Lysine biosynthesis, acetyl-DAP pathway, aspartate => lysine	0.0664083	0.79664	0.541995	control	M00525	UBA3282	0.0625	16	0	1
Nucleotide sugar biosynthesis, glucose => UDP-glucose	0.0664083	0.79664	0.541995	control	M00549	RACS_045_sp013316135	0.0625	16	0	1
Phosphatidylcholine (PC) biosynthesis, PE => PC	0.0664083	0.79664	0.541995	control	M00091	CAG_56_sp004793585_REP1	0.0625	16	0	1
Reductive acetyl-CoA pathway (Wood-Ljungdahl pathway)	0.0664083	0.79664	0.541995	control	M00377	CAG_56_sp004793585_REP1	0.0625	16	0	1
Thiamine biosynthesis, archaea, AIR (+ NAD+) => TMP/TPP	0.0664083	0.79664	0.541995	control	M00896	Paramuribaculum_sp001689565	0.0625	16	0	1
V/A-type ATPase, prokaryotes	0.0664083	0.79664	0.541995	control	M00159	RACS_045_sp013316135	0.0625	16	0	1
PRPP biosynthesis, ribose 5P => PRPP	0.0664083	0.79664	0.541995	test	M00005	Acetatifactor_sp011959105,Alistipes,CAG_56_sp004793585_REP1,COE1_sp002358575,COE1_sp009774375,Clostridia,Dubosiella_sp004793885,Kineothrix_sp000403275,Muribaculaceae,Paramuribaculum_sp001689565,RACS_045_sp013316135,UBA11940_sp013316055,UBA3282,UBA7173_sp001915385,UMGS1004_sp003343805,UMGS1994_sp900553945	0.9375	16	1	1

## Sheet: Alistipes-enriched
KEGG_MODULE	enrichment_score	unadjusted_p_value	adjusted_q_value	associated_groups	accession	sample_ids	p_control	N_control	p_test	N_test
KDO2-lipid A biosynthesis, Raetz pathway, LpxL-LpxM type	7.96885	0.00475893	0.0867245	test	M00060	Alistipes,Muribaculaceae	0.0625	16	1	1
Lipoic acid biosynthesis, plants and bacteria, octanoyl-ACP => dihydrolipoyl-E2/H	7.96885	0.00475893	0.0867245	test	M00881	Alistipes,UBA7173_sp001915385	0.0625	16	1	1
Propanoyl-CoA metabolism, propanoyl-CoA => succinyl-CoA	7.96885	0.00475893	0.0867245	test	M00741	Alistipes,Muribaculaceae	0.0625	16	1	1
Citrate cycle, second carbon oxidation, 2-oxoglutarate => oxaloacetate	4.95833	0.0259652	0.202791	test	M00011	Alistipes,Muribaculaceae,UBA7173_sp001915385	0.125	16	1	1
CMP-KDO biosynthesis	4.95833	0.0259652	0.202791	test	M00063	Alistipes,Muribaculaceae,UBA7173_sp001915385	0.125	16	1	1
Cobalamin biosynthesis, cobyrinate a,c-diamide => cobalamin	4.95833	0.0259652	0.202791	test	M00122	Alistipes,CAG_56_sp004793585_REP1,Muribaculaceae	0.125	16	1	1
Methionine degradation	4.95833	0.0259652	0.202791	test	M00035	Alistipes,CAG_56_sp004793585_REP1,Kineothrix_sp000403275	0.125	16	1	1
beta-Lactam resistance, Bla system	3.45313	0.0631323	0.203028	test	M00627	Alistipes,CAG_56_sp004793585_REP1,Paramuribaculum_sp001689565,UBA7173_sp001915385	0.1875	16	1	1
C10-C20 isoprenoid biosynthesis, archaea	3.45313	0.0631323	0.203028	test	M00365	Alistipes,Muribaculaceae,Paramuribaculum_sp001689565,UBA7173_sp001915385	0.1875	16	1	1
C10-C20 isoprenoid biosynthesis, bacteria	3.45313	0.0631323	0.203028	test	M00364	Alistipes,Muribaculaceae,Paramuribaculum_sp001689565,UBA7173_sp001915385	0.1875	16	1	1
CAM (Crassulacean acid metabolism), light	3.45313	0.0631323	0.203028	test	M00169	Alistipes,Muribaculaceae,Paramuribaculum_sp001689565,UBA7173_sp001915385	0.1875	16	1	1
KDO2-lipid A biosynthesis, Raetz pathway, non-LpxL-LpxM type	3.45313	0.0631323	0.203028	test	M00866	Alistipes,Muribaculaceae,Paramuribaculum_sp001689565,UBA7173_sp001915385	0.1875	16	1	1
Pantothenate biosynthesis, valine/L-aspartate => pantothenate	3.45313	0.0631323	0.203028	test	M00119	Alistipes,Muribaculaceae,Paramuribaculum_sp001689565,UBA7173_sp001915385	0.1875	16	1	1
Succinate dehydrogenase, prokaryotes	3.45313	0.0631323	0.203028	test	M00149	Alistipes,Muribaculaceae,Paramuribaculum_sp001689565,UBA7173_sp001915385	0.1875	16	1	1
Isoleucine biosynthesis, threonine => 2-oxobutanoate => isoleucine	3.45313	0.0631323	0.203028	control	M00570	Acetatifactor_sp011959105,CAG_56_sp004793585_REP1,COE1_sp002358575,COE1_sp009774375,Clostridia,Dubosiella_sp004793885,Kineothrix_sp000403275,Muribaculaceae,Paramuribaculum_sp001689565,RACS_045_sp013316135,UBA3282,UBA7173_sp001915385,UMGS1004_sp003343805	0.8125	16	0	1
Leucine biosynthesis, 2-oxoisovalerate => 2-oxoisocaproate	3.45313	0.0631323	0.203028	control	M00432	Acetatifactor_sp011959105,CAG_56_sp004793585_REP1,COE1_sp002358575,COE1_sp009774375,Clostridia,Dubosiella_sp004793885,Kineothrix_sp000403275,Muribaculaceae,Paramuribaculum_sp001689565,RACS_045_sp013316135,UBA3282,UBA7173_sp001915385,UMGS1004_sp003343805	0.8125	16	0	1
Valine/isoleucine biosynthesis, pyruvate => valine / 2-oxobutanoate => isoleucine	3.45313	0.0631323	0.203028	control	M00019	Acetatifactor_sp011959105,CAG_56_sp004793585_REP1,COE1_sp002358575,COE1_sp009774375,Clostridia,Dubosiella_sp004793885,Kineothrix_sp000403275,Muribaculaceae,Paramuribaculum_sp001689565,RACS_045_sp013316135,UBA3282,UBA7173_sp001915385,UMGS1004_sp003343805	0.8125	16	0	1
Glycogen degradation, glycogen => glucose-6P	2.55	0.110294	0.274085	control	M00855	Acetatifactor_sp011959105,CAG_56_sp004793585_REP1,COE1_sp002358575,COE1_sp009774375,Clostridia,Dubosiella_sp004793885,Kineothrix_sp000403275,Muribaculaceae,RACS_045_sp013316135,UBA3282,UBA7173_sp001915385,UMGS1004_sp003343805	0.75	16	0	1
Histidine biosynthesis, PRPP => histidine	2.55	0.110294	0.274085	control	M00026	Acetatifactor_sp011959105,CAG_56_sp004793585_REP1,COE1_sp002358575,COE1_sp009774375,Clostridia,Dubosiella_sp004793885,Kineothrix_sp000403275,Muribaculaceae,RACS_045_sp013316135,UBA3282,UBA7173_sp001915385,UMGS1004_sp003343805	0.75	16	0	1
Lysine biosynthesis, DAP aminotransferase pathway, aspartate => lysine	2.55	0.110294	0.274085	control	M00527	Acetatifactor_sp011959105,CAG_56_sp004793585_REP1,COE1_sp002358575,COE1_sp009774375,Clostridia,Kineothrix_sp000403275,Muribaculaceae,Paramuribaculum_sp001689565,RACS_045_sp013316135,UBA3282,UBA7173_sp001915385,UMGS1004_sp003343805	0.75	16	0	1
Lysine biosynthesis, DAP dehydrogenase pathway, aspartate => lysine	2.55	0.110294	0.274085	control	M00526	Acetatifactor_sp011959105,CAG_56_sp004793585_REP1,COE1_sp002358575,COE1_sp009774375,Clostridia,Kineothrix_sp000403275,Muribaculaceae,Paramuribaculum_sp001689565,RACS_045_sp013316135,UBA3282,UBA7173_sp001915385,UMGS1004_sp003343805	0.75	16	0	1
Threonine biosynthesis, aspartate => homoserine => threonine	2.55	0.110294	0.274085	control	M00018	Acetatifactor_sp011959105,CAG_56_sp004793585_REP1,COE1_sp002358575,COE1_sp009774375,Clostridia,Dubosiella_sp004793885,Kineothrix_sp000403275,Muribaculaceae,Paramuribaculum_sp001689565,RACS_045_sp013316135,UBA3282,UMGS1004_sp003343805	0.75	16	0	1
D-Galacturonate degradation (bacteria), D-galacturonate => pyruvate + D-glyceraldehyde 3P	1.94795	0.162808	0.329661	test	M00631	Acetatifactor_sp011959105,Alistipes,COE1_sp002358575,COE1_sp009774375,Dubosiella_sp004793885,UBA3282	0.3125	16	1	1
Phosphatidylethanolamine (PE) biosynthesis, PA => PS => PE	1.94795	0.162808	0.329661	test	M00093	Alistipes,CAG_56_sp004793585_REP1,Muribaculaceae,Paramuribaculum_sp001689565,UBA7173_sp001915385,UMGS1004_sp003343805	0.3125	16	1	1
Cysteine biosynthesis, serine => cysteine	1.94795	0.162808	0.329661	control	M00021	CAG_56_sp004793585_REP1,COE1_sp002358575,COE1_sp009774375,Clostridia,Kineothrix_sp000403275,Muribaculaceae,Paramuribaculum_sp001689565,RACS_045_sp013316135,UBA3282,UBA7173_sp001915385,UMGS1004_sp003343805	0.6875	16	0	1
F-type ATPase, prokaryotes and chloroplasts	1.94795	0.162808	0.329661	control	M00157	Acetatifactor_sp011959105,CAG_56_sp004793585_REP1,COE1_sp002358575,COE1_sp009774375,Clostridia,Dubosiella_sp004793885,Kineothrix_sp000403275,Muribaculaceae,Paramuribaculum_sp001689565,UBA3282,UBA7173_sp001915385	0.6875	16	0	1
Glycogen biosynthesis, glucose-1P => glycogen/starch	1.94795	0.162808	0.329661	control	M00854	Acetatifactor_sp011959105,CAG_56_sp004793585_REP1,COE1_sp002358575,COE1_sp009774375,Clostridia,Dubosiella_sp004793885,Kineothrix_sp000403275,RACS_045_sp013316135,UBA11940_sp013316055,UBA3282,UMGS1004_sp003343805	0.6875	16	0	1
NAD biosynthesis, aspartate => quinolinate => NAD	1.51786	0.217943	0.410866	test	M00115	Alistipes,COE1_sp002358575,COE1_sp009774375,Muribaculaceae,Paramuribaculum_sp001689565,UBA7173_sp001915385,UMGS1004_sp003343805	0.375	16	1	1
Serine biosynthesis, glycerate-3P => serine	1.51786	0.217943	0.410866	test	M00020	Acetatifactor_sp011959105,Alistipes,COE1_sp002358575,COE1_sp009774375,Muribaculaceae,Paramuribaculum_sp001689565,UBA7173_sp001915385	0.375	16	1	1
C1-unit interconversion, prokaryotes	1.19531	0.274261	0.4284	control	M00140	Acetatifactor_sp011959105,CAG_56_sp004793585_REP1,COE1_sp002358575,COE1_sp009774375,Clostridia,Kineothrix_sp000403275,RACS_045_sp013316135,UBA3282,UMGS1004_sp003343805	0.5625	16	0	1
Lysine biosynthesis, succinyl-DAP pathway, aspartate => lysine	1.19531	0.274261	0.4284	control	M00016	CAG_56_sp004793585_REP1,COE1_sp002358575,COE1_sp009774375,Clostridia,Kineothrix_sp000403275,Muribaculaceae,RACS_045_sp013316135,UBA3282,UMGS1004_sp003343805	0.5625	16	0	1
Ornithine biosynthesis, glutamate => ornithine	1.19531	0.274261	0.4284	control	M00028	Acetatifactor_sp011959105,CAG_56_sp004793585_REP1,COE1_sp002358575,COE1_sp009774375,Clostridia,Kineothrix_sp000403275,Muribaculaceae,RACS_045_sp013316135,UBA3282	0.5625	16	0	1
UDP-N-acetyl-D-glucosamine biosynthesis, prokaryotes, glucose => UDP-GlcNAc	1.19531	0.274261	0.4284	control	M00909	Acetatifactor_sp011959105,COE1_sp002358575,COE1_sp009774375,Clostridia,Dubosiella_sp004793885,Kineothrix_sp000403275,RACS_045_sp013316135,UBA3282,UMGS1004_sp003343805	0.5625	16	0	1
Fatty acid biosynthesis, elongation	1.19531	0.274261	0.4284	test	M00083	Acetatifactor_sp011959105,Alistipes,CAG_56_sp004793585_REP1,COE1_sp002358575,COE1_sp009774375,Muribaculaceae,Paramuribaculum_sp001689565,UMGS1994_sp900553945	0.4375	16	1	1
Tetrahydrofolate biosynthesis, GTP => THF	1.19531	0.274261	0.4284	test	M00126	Acetatifactor_sp011959105,Alistipes,CAG_56_sp004793585_REP1,Clostridia,Muribaculaceae,RACS_045_sp013316135,UBA3282,UBA7173_sp001915385	0.4375	16	1	1
Arginine biosynthesis, ornithine => arginine	0.944445	0.331137	0.476408	control	M00844	CAG_56_sp004793585_REP1,COE1_sp002358575,COE1_sp009774375,Clostridia,Kineothrix_sp000403275,RACS_045_sp013316135,UBA3282,UMGS1004_sp003343805	0.5	16	0	1
Proline biosynthesis, glutamate => proline	0.944445	0.331137	0.476408	control	M00015	Acetatifactor_sp011959105,COE1_sp002358575,COE1_sp009774375,Clostridia,Dubosiella_sp004793885,Kineothrix_sp000403275,UBA3282,UBA7173_sp001915385	0.5	16	0	1
Galactose degradation, Leloir pathway, galactose => alpha-D-glucose-1P	0.944445	0.331137	0.476408	test	M00632	Acetatifactor_sp011959105,Alistipes,CAG_56_sp004793585_REP1,Clostridia,Kineothrix_sp000403275,Muribaculaceae,Paramuribaculum_sp001689565,UBA3282,UBA7173_sp001915385	0.5	16	1	1
beta-Oxidation, acyl-CoA synthesis	0.74375	0.388462	0.530937	test	M00086	Alistipes,CAG_56_sp004793585_REP1,COE1_sp002358575,COE1_sp009774375,Dubosiella_sp004793885,Muribaculaceae,Paramuribaculum_sp001689565,RACS_045_sp013316135,UBA7173_sp001915385,UMGS1994_sp900553945	0.5625	16	1	1
D-Glucuronate degradation, D-glucuronate => pyruvate + D-glyceraldehyde 3P	0.74375	0.388462	0.530937	test	M00061	Acetatifactor_sp011959105,Alistipes,COE1_sp002358575,COE1_sp009774375,Clostridia,Dubosiella_sp004793885,Muribaculaceae,RACS_045_sp013316135,UBA3282,UMGS1004_sp003343805	0.5625	16	1	1
Methionine biosynthesis, apartate => homoserine => methionine	0.579546	0.44649	0.531132	control	M00017	CAG_56_sp004793585_REP1,Clostridia,Kineothrix_sp000403275,Muribaculaceae,Paramuribaculum_sp001689565,UBA3282	0.375	16	0	1
Semi-phosphorylative Entner-Doudoroff pathway, gluconate => glycerate-3P	0.579546	0.44649	0.531132	test	M00308	Acetatifactor_sp011959105,Alistipes,CAG_56_sp004793585_REP1,COE1_sp002358575,COE1_sp009774375,Clostridia,Dubosiella_sp004793885,Muribaculaceae,RACS_045_sp013316135,UBA3282,UMGS1004_sp003343805	0.625	16	1	1
dTDP-L-rhamnose biosynthesis	0.442709	0.505818	0.531132	test	M00793	Acetatifactor_sp011959105,Alistipes,CAG_56_sp004793585_REP1,COE1_sp002358575,COE1_sp009774375,Clostridia,Kineothrix_sp000403275,Muribaculaceae,Paramuribaculum_sp001689565,UBA11940_sp013316055,UBA3282,UBA7173_sp001915385	0.6875	16	1	1
Gluconeogenesis, oxaloacetate => fructose-6P	0.442709	0.505818	0.531132	test	M00003	Acetatifactor_sp011959105,Alistipes,CAG_56_sp004793585_REP1,COE1_sp002358575,COE1_sp009774375,Clostridia,Kineothrix_sp000403275,Muribaculaceae,Paramuribaculum_sp001689565,RACS_045_sp013316135,UBA3282,UMGS1004_sp003343805	0.6875	16	1	1
Phosphate acetyltransferase-acetate kinase pathway, acetyl-CoA => acetate	0.442709	0.505818	0.531132	control	M00579	CAG_56_sp004793585_REP1,COE1_sp002358575,Kineothrix_sp000403275,UBA3282,UMGS1994_sp900553945	0.3125	16	0	1
C5 isoprenoid biosynthesis, non-mevalonate pathway	0.326925	0.567476	0.531132	test	M00096	Acetatifactor_sp011959105,Alistipes,CAG_56_sp004793585_REP1,COE1_sp002358575,COE1_sp009774375,Clostridia,Kineothrix_sp000403275,Muribaculaceae,Paramuribaculum_sp001689565,RACS_045_sp013316135,UBA3282,UBA7173_sp001915385,UMGS1004_sp003343805	0.75	16	1	1
Fatty acid biosynthesis, initiation	0.326925	0.567476	0.531132	control	M00082	Acetatifactor_sp011959105,CAG_56_sp004793585_REP1,COE1_sp002358575,COE1_sp009774375	0.25	16	0	1
Multidrug resistance, efflux pump MepA	0.326925	0.567476	0.531132	control	M00705	Acetatifactor_sp011959105,COE1_sp002358575,COE1_sp009774375,Dubosiella_sp004793885	0.25	16	0	1
Pyruvate oxidation, pyruvate => acetyl-CoA	0.326925	0.567476	0.531132	test	M00307	Acetatifactor_sp011959105,Alistipes,CAG_56_sp004793585_REP1,COE1_sp002358575,COE1_sp009774375,Dubosiella_sp004793885,Muribaculaceae,Paramuribaculum_sp001689565,RACS_045_sp013316135,UBA11940_sp013316055,UBA7173_sp001915385,UMGS1004_sp003343805,UMGS1994_sp900553945	0.75	16	1	1
Riboflavin biosynthesis, plants and bacteria, GTP => riboflavin/FMN/FAD	0.326925	0.567476	0.531132	control	M00125	CAG_56_sp004793585_REP1,Muribaculaceae,Paramuribaculum_sp001689565,UBA7173_sp001915385	0.25	16	0	1
Adenine ribonucleotide biosynthesis, IMP => ADP,ATP	0.227679	0.633251	0.531132	test	M00049	Acetatifactor_sp011959105,Alistipes,CAG_56_sp004793585_REP1,COE1_sp002358575,COE1_sp009774375,Clostridia,Kineothrix_sp000403275,Muribaculaceae,Paramuribaculum_sp001689565,RACS_045_sp013316135,UBA11940_sp013316055,UBA3282,UBA7173_sp001915385,UMGS1004_sp003343805	0.8125	16	1	1
Coenzyme A biosynthesis, pantothenate => CoA	0.227679	0.633251	0.531132	test	M00120	Acetatifactor_sp011959105,Alistipes,CAG_56_sp004793585_REP1,COE1_sp002358575,COE1_sp009774375,Clostridia,Dubosiella_sp004793885,Kineothrix_sp000403275,Muribaculaceae,RACS_045_sp013316135,UBA11940_sp013316055,UBA3282,UBA7173_sp001915385,UMGS1004_sp003343805	0.8125	16	1	1
Glycolysis, core module involving three-carbon compounds	0.227679	0.633251	0.531132	test	M00002	Acetatifactor_sp011959105,Alistipes,CAG_56_sp004793585_REP1,COE1_sp002358575,COE1_sp009774375,Clostridia,Dubosiella_sp004793885,Kineothrix_sp000403275,Muribaculaceae,Paramuribaculum_sp001689565,UBA11940_sp013316055,UBA3282,UMGS1004_sp003343805,UMGS1994_sp900553945	0.8125	16	1	1
Guanine ribonucleotide biosynthesis IMP => GDP,GTP	0.227679	0.633251	0.531132	test	M00050	Acetatifactor_sp011959105,Alistipes,CAG_56_sp004793585_REP1,COE1_sp002358575,COE1_sp009774375,Clostridia,Dubosiella_sp004793885,Kineothrix_sp000403275,Muribaculaceae,Paramuribaculum_sp001689565,RACS_045_sp013316135,UBA3282,UBA7173_sp001915385,UMGS1004_sp003343805	0.8125	16	1	1
Uridine monophosphate biosynthesis, glutamine (+ PRPP) => UMP	0.227679	0.633251	0.531132	test	M00051	Acetatifactor_sp011959105,Alistipes,CAG_56_sp004793585_REP1,COE1_sp002358575,COE1_sp009774375,Clostridia,Dubosiella_sp004793885,Kineothrix_sp000403275,Muribaculaceae,Paramuribaculum_sp001689565,RACS_045_sp013316135,UBA11940_sp013316055,UBA3282,UMGS1004_sp003343805	0.8125	16	1	1
Acylglycerol degradation	0.227679	0.633251	0.531132	control	M00098	Clostridia,RACS_045_sp013316135,UBA3282	0.1875	16	0	1
Biotin biosynthesis, BioW pathway, pimelate => pimeloyl-CoA => biotin	0.227679	0.633251	0.531132	control	M00577	Muribaculaceae,Paramuribaculum_sp001689565,UBA7173_sp001915385	0.1875	16	0	1
Biotin biosynthesis, pimeloyl-ACP/CoA => biotin	0.227679	0.633251	0.531132	control	M00123	Muribaculaceae,Paramuribaculum_sp001689565,UBA7173_sp001915385	0.1875	16	0	1
NADH:quinone oxidoreductase, prokaryotes	0.227679	0.633251	0.531132	control	M00144	Muribaculaceae,Paramuribaculum_sp001689565,UBA7173_sp001915385	0.1875	16	0	1
Pyrimidine ribonucleotide biosynthesis, UMP => UDP/UTP,CDP/CTP	0.227679	0.633251	0.531132	control	M00052	Muribaculaceae,Paramuribaculum_sp001689565,UBA7173_sp001915385	0.1875	16	0	1
Siroheme biosynthesis, glutamyl-tRNA => siroheme	0.227679	0.633251	0.531132	control	M00846	Acetatifactor_sp011959105,CAG_56_sp004793585_REP1,Dubosiella_sp004793885	0.1875	16	0	1
Tryptophan biosynthesis, chorismate => tryptophan	0.227679	0.633251	0.531132	control	M00023	COE1_sp002358575,COE1_sp009774375,UBA7173_sp001915385	0.1875	16	0	1
Vancomycin resistance, D-Ala-D-Ser type	0.227679	0.633251	0.531132	control	M00652	Acetatifactor_sp011959105,COE1_sp002358575,COE1_sp009774375	0.1875	16	0	1
Glycolysis (Embden-Meyerhof pathway), glucose => pyruvate	0.141667	0.70663	0.531132	test	M00001	Acetatifactor_sp011959105,Alistipes,CAG_56_sp004793585_REP1,COE1_sp002358575,COE1_sp009774375,Clostridia,Dubosiella_sp004793885,Kineothrix_sp000403275,Muribaculaceae,Paramuribaculum_sp001689565,RACS_045_sp013316135,UBA11940_sp013316055,UBA3282,UMGS1004_sp003343805,UMGS1994_sp900553945	0.875	16	1	1
Inosine monophosphate biosynthesis, PRPP + glutamine => IMP	0.141667	0.70663	0.531132	test	M00048	Acetatifactor_sp011959105,Alistipes,CAG_56_sp004793585_REP1,COE1_sp002358575,COE1_sp009774375,Clostridia,Dubosiella_sp004793885,Kineothrix_sp000403275,Muribaculaceae,Paramuribaculum_sp001689565,RACS_045_sp013316135,UBA11940_sp013316055,UBA3282,UBA7173_sp001915385,UMGS1004_sp003343805	0.875	16	1	1
Pentose phosphate pathway, non-oxidative phase, fructose 6P => ribose 5P	0.141667	0.70663	0.531132	test	M00007	Acetatifactor_sp011959105,Alistipes,CAG_56_sp004793585_REP1,COE1_sp002358575,COE1_sp009774375,Clostridia,Dubosiella_sp004793885,Kineothrix_sp000403275,Muribaculaceae,Paramuribaculum_sp001689565,RACS_045_sp013316135,UBA3282,UBA7173_sp001915385,UMGS1004_sp003343805,UMGS1994_sp900553945	0.875	16	1	1
Shikimate pathway, phosphoenolpyruvate + erythrose-4P => chorismate	0.141667	0.70663	0.531132	test	M00022	Acetatifactor_sp011959105,Alistipes,CAG_56_sp004793585_REP1,COE1_sp002358575,COE1_sp009774375,Clostridia,Dubosiella_sp004793885,Kineothrix_sp000403275,Muribaculaceae,Paramuribaculum_sp001689565,RACS_045_sp013316135,UBA11940_sp013316055,UBA3282,UBA7173_sp001915385,UMGS1004_sp003343805	0.875	16	1	1
Pentose phosphate pathway (Pentose phosphate cycle)	0.141667	0.70663	0.531132	control	M00004	Acetatifactor_sp011959105,COE1_sp009774375	0.125	16	0	1
Polyamine biosynthesis, arginine => agmatine => putrescine => spermidine	0.141667	0.70663	0.531132	control	M00133	Acetatifactor_sp011959105,COE1_sp009774375	0.125	16	0	1
Pyridoxal-P biosynthesis, R5P + glyceraldehyde-3P + glutamine => pyridoxal-P	0.141667	0.70663	0.531132	control	M00916	CAG_56_sp004793585_REP1,Kineothrix_sp000403275	0.125	16	0	1
Thiamine biosynthesis, prokaryotes, AIR (+ DXP/tyrosine) => TMP/TPP	0.141667	0.70663	0.531132	control	M00127	CAG_56_sp004793585_REP1,Paramuribaculum_sp001689565	0.125	16	0	1
UDP-L-FucNAm biosynthesis	0.141667	0.70663	0.531132	control	M00923	Muribaculaceae,Paramuribaculum_sp001689565	0.125	16	0	1
Acetogen	0.0664083	0.79664	0.531132	control	M00618	CAG_56_sp004793585_REP1	0.0625	16	0	1
ADP-L-glycero-D-manno-heptose biosynthesis	0.0664083	0.79664	0.531132	control	M00064	COE1_sp002358575	0.0625	16	0	1
Cobalamin biosynthesis, anaerobic, uroporphyrinogen III => sirohydrochlorin => cobyrinate a,c-diamide	0.0664083	0.79664	0.531132	control	M00924	CAG_56_sp004793585_REP1	0.0625	16	0	1
Lysine biosynthesis, acetyl-DAP pathway, aspartate => lysine	0.0664083	0.79664	0.531132	control	M00525	UBA3282	0.0625	16	0	1
Nucleotide sugar biosynthesis, glucose => UDP-glucose	0.0664083	0.79664	0.531132	control	M00549	RACS_045_sp013316135	0.0625	16	0	1
Phosphatidylcholine (PC) biosynthesis, PE => PC	0.0664083	0.79664	0.531132	control	M00091	CAG_56_sp004793585_REP1	0.0625	16	0	1
Reductive acetyl-CoA pathway (Wood-Ljungdahl pathway)	0.0664083	0.79664	0.531132	control	M00377	CAG_56_sp004793585_REP1	0.0625	16	0	1
Thiamine biosynthesis, archaea, AIR (+ NAD+) => TMP/TPP	0.0664083	0.79664	0.531132	control	M00896	Paramuribaculum_sp001689565	0.0625	16	0	1
V/A-type ATPase, prokaryotes	0.0664083	0.79664	0.531132	control	M00159	RACS_045_sp013316135	0.0625	16	0	1
PRPP biosynthesis, ribose 5P => PRPP	0.0664083	0.79664	0.531132	test	M00005	Acetatifactor_sp011959105,Alistipes,CAG_56_sp004793585_REP1,COE1_sp002358575,COE1_sp009774375,Clostridia,Dubosiella_sp004793885,Kineothrix_sp000403275,Muribaculaceae,Paramuribaculum_sp001689565,RACS_045_sp013316135,UBA11940_sp013316055,UBA3282,UBA7173_sp001915385,UMGS1004_sp003343805,UMGS1994_sp900553945	0.9375	16	1	1

## Sheet: CAG_56_sp004793585_REP1-enriche
KEGG_MODULE	enrichment_score	unadjusted_p_value	adjusted_q_value	associated_groups	accession	sample_ids	p_control	N_control	p_test	N_test
Acetogen	17	3.73798e-05	0.000384371	test	M00618	CAG_56_sp004793585_REP1	0	16	1	1
Cobalamin biosynthesis, anaerobic, uroporphyrinogen III => sirohydrochlorin => cobyrinate a,c-diamide	17	3.73798e-05	0.000384371	test	M00924	CAG_56_sp004793585_REP1	0	16	1	1
Phosphatidylcholine (PC) biosynthesis, PE => PC	17	3.73798e-05	0.000384371	test	M00091	CAG_56_sp004793585_REP1	0	16	1	1
Reductive acetyl-CoA pathway (Wood-Ljungdahl pathway)	17	3.73798e-05	0.000384371	test	M00377	CAG_56_sp004793585_REP1	0	16	1	1
Pyridoxal-P biosynthesis, R5P + glyceraldehyde-3P + glutamine => pyridoxal-P	7.96885	0.00475893	0.0326236	test	M00916	CAG_56_sp004793585_REP1,Kineothrix_sp000403275	0.0625	16	1	1
Thiamine biosynthesis, prokaryotes, AIR (+ DXP/tyrosine) => TMP/TPP	7.96885	0.00475893	0.0326236	test	M00127	CAG_56_sp004793585_REP1,Paramuribaculum_sp001689565	0.0625	16	1	1
Cobalamin biosynthesis, cobyrinate a,c-diamide => cobalamin	4.95833	0.0259652	0.118665	test	M00122	Alistipes,CAG_56_sp004793585_REP1,Muribaculaceae	0.125	16	1	1
Methionine degradation	4.95833	0.0259652	0.118665	test	M00035	Alistipes,CAG_56_sp004793585_REP1,Kineothrix_sp000403275	0.125	16	1	1
Siroheme biosynthesis, glutamyl-tRNA => siroheme	4.95833	0.0259652	0.118665	test	M00846	Acetatifactor_sp011959105,CAG_56_sp004793585_REP1,Dubosiella_sp004793885	0.125	16	1	1
beta-Lactam resistance, Bla system	3.45313	0.0631323	0.216393	test	M00627	Alistipes,CAG_56_sp004793585_REP1,Paramuribaculum_sp001689565,UBA7173_sp001915385	0.1875	16	1	1
Fatty acid biosynthesis, initiation	3.45313	0.0631323	0.216393	test	M00082	Acetatifactor_sp011959105,CAG_56_sp004793585_REP1,COE1_sp002358575,COE1_sp009774375	0.1875	16	1	1
Riboflavin biosynthesis, plants and bacteria, GTP => riboflavin/FMN/FAD	3.45313	0.0631323	0.216393	test	M00125	CAG_56_sp004793585_REP1,Muribaculaceae,Paramuribaculum_sp001689565,UBA7173_sp001915385	0.1875	16	1	1
Phosphate acetyltransferase-acetate kinase pathway, acetyl-CoA => acetate	2.55	0.110294	0.348966	test	M00579	CAG_56_sp004793585_REP1,COE1_sp002358575,Kineothrix_sp000403275,UBA3282,UMGS1994_sp900553945	0.25	16	1	1
Methionine biosynthesis, apartate => homoserine => methionine	1.94795	0.162808	0.38243	test	M00017	CAG_56_sp004793585_REP1,Clostridia,Kineothrix_sp000403275,Muribaculaceae,Paramuribaculum_sp001689565,UBA3282	0.3125	16	1	1
Phosphatidylethanolamine (PE) biosynthesis, PA => PS => PE	1.94795	0.162808	0.38243	test	M00093	Alistipes,CAG_56_sp004793585_REP1,Muribaculaceae,Paramuribaculum_sp001689565,UBA7173_sp001915385,UMGS1004_sp003343805	0.3125	16	1	1
D-Glucuronate degradation, D-glucuronate => pyruvate + D-glyceraldehyde 3P	1.51786	0.217943	0.38243	control	M00061	Acetatifactor_sp011959105,Alistipes,COE1_sp002358575,COE1_sp009774375,Clostridia,Dubosiella_sp004793885,Muribaculaceae,RACS_045_sp013316135,UBA3282,UMGS1004_sp003343805	0.625	16	0	1
UDP-N-acetyl-D-glucosamine biosynthesis, prokaryotes, glucose => UDP-GlcNAc	1.19531	0.274261	0.38243	control	M00909	Acetatifactor_sp011959105,COE1_sp002358575,COE1_sp009774375,Clostridia,Dubosiella_sp004793885,Kineothrix_sp000403275,RACS_045_sp013316135,UBA3282,UMGS1004_sp003343805	0.5625	16	0	1
Arginine biosynthesis, ornithine => arginine	1.19531	0.274261	0.38243	test	M00844	CAG_56_sp004793585_REP1,COE1_sp002358575,COE1_sp009774375,Clostridia,Kineothrix_sp000403275,RACS_045_sp013316135,UBA3282,UMGS1004_sp003343805	0.4375	16	1	1
Fatty acid biosynthesis, elongation	1.19531	0.274261	0.38243	test	M00083	Acetatifactor_sp011959105,Alistipes,CAG_56_sp004793585_REP1,COE1_sp002358575,COE1_sp009774375,Muribaculaceae,Paramuribaculum_sp001689565,UMGS1994_sp900553945	0.4375	16	1	1
Tetrahydrofolate biosynthesis, GTP => THF	1.19531	0.274261	0.38243	test	M00126	Acetatifactor_sp011959105,Alistipes,CAG_56_sp004793585_REP1,Clostridia,Muribaculaceae,RACS_045_sp013316135,UBA3282,UBA7173_sp001915385	0.4375	16	1	1
Proline biosynthesis, glutamate => proline	0.944445	0.331137	0.38243	control	M00015	Acetatifactor_sp011959105,COE1_sp002358575,COE1_sp009774375,Clostridia,Dubosiella_sp004793885,Kineothrix_sp000403275,UBA3282,UBA7173_sp001915385	0.5	16	0	1
C1-unit interconversion, prokaryotes	0.944445	0.331137	0.38243	test	M00140	Acetatifactor_sp011959105,CAG_56_sp004793585_REP1,COE1_sp002358575,COE1_sp009774375,Clostridia,Kineothrix_sp000403275,RACS_045_sp013316135,UBA3282,UMGS1004_sp003343805	0.5	16	1	1
Galactose degradation, Leloir pathway, galactose => alpha-D-glucose-1P	0.944445	0.331137	0.38243	test	M00632	Acetatifactor_sp011959105,Alistipes,CAG_56_sp004793585_REP1,Clostridia,Kineothrix_sp000403275,Muribaculaceae,Paramuribaculum_sp001689565,UBA3282,UBA7173_sp001915385	0.5	16	1	1
Lysine biosynthesis, succinyl-DAP pathway, aspartate => lysine	0.944445	0.331137	0.38243	test	M00016	CAG_56_sp004793585_REP1,COE1_sp002358575,COE1_sp009774375,Clostridia,Kineothrix_sp000403275,Muribaculaceae,RACS_045_sp013316135,UBA3282,UMGS1004_sp003343805	0.5	16	1	1
Ornithine biosynthesis, glutamate => ornithine	0.944445	0.331137	0.38243	test	M00028	Acetatifactor_sp011959105,CAG_56_sp004793585_REP1,COE1_sp002358575,COE1_sp009774375,Clostridia,Kineothrix_sp000403275,Muribaculaceae,RACS_045_sp013316135,UBA3282	0.5	16	1	1
beta-Oxidation, acyl-CoA synthesis	0.74375	0.388462	0.38243	test	M00086	Alistipes,CAG_56_sp004793585_REP1,COE1_sp002358575,COE1_sp009774375,Dubosiella_sp004793885,Muribaculaceae,Paramuribaculum_sp001689565,RACS_045_sp013316135,UBA7173_sp001915385,UMGS1994_sp900553945	0.5625	16	1	1
NAD biosynthesis, aspartate => quinolinate => NAD	0.74375	0.388462	0.38243	control	M00115	Alistipes,COE1_sp002358575,COE1_sp009774375,Muribaculaceae,Paramuribaculum_sp001689565,UBA7173_sp001915385,UMGS1004_sp003343805	0.4375	16	0	1
Serine biosynthesis, glycerate-3P => serine	0.74375	0.388462	0.38243	control	M00020	Acetatifactor_sp011959105,Alistipes,COE1_sp002358575,COE1_sp009774375,Muribaculaceae,Paramuribaculum_sp001689565,UBA7173_sp001915385	0.4375	16	0	1
D-Galacturonate degradation (bacteria), D-galacturonate => pyruvate + D-glyceraldehyde 3P	0.579546	0.44649	0.38243	control	M00631	Acetatifactor_sp011959105,Alistipes,COE1_sp002358575,COE1_sp009774375,Dubosiella_sp004793885,UBA3282	0.375	16	0	1
Cysteine biosynthesis, serine => cysteine	0.579546	0.44649	0.38243	test	M00021	CAG_56_sp004793585_REP1,COE1_sp002358575,COE1_sp009774375,Clostridia,Kineothrix_sp000403275,Muribaculaceae,Paramuribaculum_sp001689565,RACS_045_sp013316135,UBA3282,UBA7173_sp001915385,UMGS1004_sp003343805	0.625	16	1	1
F-type ATPase, prokaryotes and chloroplasts	0.579546	0.44649	0.38243	test	M00157	Acetatifactor_sp011959105,CAG_56_sp004793585_REP1,COE1_sp002358575,COE1_sp009774375,Clostridia,Dubosiella_sp004793885,Kineothrix_sp000403275,Muribaculaceae,Paramuribaculum_sp001689565,UBA3282,UBA7173_sp001915385	0.625	16	1	1
Glycogen biosynthesis, glucose-1P => glycogen/starch	0.579546	0.44649	0.38243	test	M00854	Acetatifactor_sp011959105,CAG_56_sp004793585_REP1,COE1_sp002358575,COE1_sp009774375,Clostridia,Dubosiella_sp004793885,Kineothrix_sp000403275,RACS_045_sp013316135,UBA11940_sp013316055,UBA3282,UMGS1004_sp003343805	0.625	16	1	1
Semi-phosphorylative Entner-Doudoroff pathway, gluconate => glycerate-3P	0.579546	0.44649	0.38243	test	M00308	Acetatifactor_sp011959105,Alistipes,CAG_56_sp004793585_REP1,COE1_sp002358575,COE1_sp009774375,Clostridia,Dubosiella_sp004793885,Muribaculaceae,RACS_045_sp013316135,UBA3282,UMGS1004_sp003343805	0.625	16	1	1
dTDP-L-rhamnose biosynthesis	0.442709	0.505818	0.38243	test	M00793	Acetatifactor_sp011959105,Alistipes,CAG_56_sp004793585_REP1,COE1_sp002358575,COE1_sp009774375,Clostridia,Kineothrix_sp000403275,Muribaculaceae,Paramuribaculum_sp001689565,UBA11940_sp013316055,UBA3282,UBA7173_sp001915385	0.6875	16	1	1
Gluconeogenesis, oxaloacetate => fructose-6P	0.442709	0.505818	0.38243	test	M00003	Acetatifactor_sp011959105,Alistipes,CAG_56_sp004793585_REP1,COE1_sp002358575,COE1_sp009774375,Clostridia,Kineothrix_sp000403275,Muribaculaceae,Paramuribaculum_sp001689565,RACS_045_sp013316135,UBA3282,UMGS1004_sp003343805	0.6875	16	1	1
Glycogen degradation, glycogen => glucose-6P	0.442709	0.505818	0.38243	test	M00855	Acetatifactor_sp011959105,CAG_56_sp004793585_REP1,COE1_sp002358575,COE1_sp009774375,Clostridia,Dubosiella_sp004793885,Kineothrix_sp000403275,Muribaculaceae,RACS_045_sp013316135,UBA3282,UBA7173_sp001915385,UMGS1004_sp003343805	0.6875	16	1	1
Histidine biosynthesis, PRPP => histidine	0.442709	0.505818	0.38243	test	M00026	Acetatifactor_sp011959105,CAG_56_sp004793585_REP1,COE1_sp002358575,COE1_sp009774375,Clostridia,Dubosiella_sp004793885,Kineothrix_sp000403275,Muribaculaceae,RACS_045_sp013316135,UBA3282,UBA7173_sp001915385,UMGS1004_sp003343805	0.6875	16	1	1
Lysine biosynthesis, DAP aminotransferase pathway, aspartate => lysine	0.442709	0.505818	0.38243	test	M00527	Acetatifactor_sp011959105,CAG_56_sp004793585_REP1,COE1_sp002358575,COE1_sp009774375,Clostridia,Kineothrix_sp000403275,Muribaculaceae,Paramuribaculum_sp001689565,RACS_045_sp013316135,UBA3282,UBA7173_sp001915385,UMGS1004_sp003343805	0.6875	16	1	1
Lysine biosynthesis, DAP dehydrogenase pathway, aspartate => lysine	0.442709	0.505818	0.38243	test	M00526	Acetatifactor_sp011959105,CAG_56_sp004793585_REP1,COE1_sp002358575,COE1_sp009774375,Clostridia,Kineothrix_sp000403275,Muribaculaceae,Paramuribaculum_sp001689565,RACS_045_sp013316135,UBA3282,UBA7173_sp001915385,UMGS1004_sp003343805	0.6875	16	1	1
Threonine biosynthesis, aspartate => homoserine => threonine	0.442709	0.505818	0.38243	test	M00018	Acetatifactor_sp011959105,CAG_56_sp004793585_REP1,COE1_sp002358575,COE1_sp009774375,Clostridia,Dubosiella_sp004793885,Kineothrix_sp000403275,Muribaculaceae,Paramuribaculum_sp001689565,RACS_045_sp013316135,UBA3282,UMGS1004_sp003343805	0.6875	16	1	1
C10-C20 isoprenoid biosynthesis, archaea	0.326925	0.567476	0.38243	control	M00365	Alistipes,Muribaculaceae,Paramuribaculum_sp001689565,UBA7173_sp001915385	0.25	16	0	1
C10-C20 isoprenoid biosynthesis, bacteria	0.326925	0.567476	0.38243	control	M00364	Alistipes,Muribaculaceae,Paramuribaculum_sp001689565,UBA7173_sp001915385	0.25	16	0	1
C5 isoprenoid biosynthesis, non-mevalonate pathway	0.326925	0.567476	0.38243	test	M00096	Acetatifactor_sp011959105,Alistipes,CAG_56_sp004793585_REP1,COE1_sp002358575,COE1_sp009774375,Clostridia,Kineothrix_sp000403275,Muribaculaceae,Paramuribaculum_sp001689565,RACS_045_sp013316135,UBA3282,UBA7173_sp001915385,UMGS1004_sp003343805	0.75	16	1	1
CAM (Crassulacean acid metabolism), light	0.326925	0.567476	0.38243	control	M00169	Alistipes,Muribaculaceae,Paramuribaculum_sp001689565,UBA7173_sp001915385	0.25	16	0	1
Isoleucine biosynthesis, threonine => 2-oxobutanoate => isoleucine	0.326925	0.567476	0.38243	test	M00570	Acetatifactor_sp011959105,CAG_56_sp004793585_REP1,COE1_sp002358575,COE1_sp009774375,Clostridia,Dubosiella_sp004793885,Kineothrix_sp000403275,Muribaculaceae,Paramuribaculum_sp001689565,RACS_045_sp013316135,UBA3282,UBA7173_sp001915385,UMGS1004_sp003343805	0.75	16	1	1
KDO2-lipid A biosynthesis, Raetz pathway, non-LpxL-LpxM type	0.326925	0.567476	0.38243	control	M00866	Alistipes,Muribaculaceae,Paramuribaculum_sp001689565,UBA7173_sp001915385	0.25	16	0	1
Leucine biosynthesis, 2-oxoisovalerate => 2-oxoisocaproate	0.326925	0.567476	0.38243	test	M00432	Acetatifactor_sp011959105,CAG_56_sp004793585_REP1,COE1_sp002358575,COE1_sp009774375,Clostridia,Dubosiella_sp004793885,Kineothrix_sp000403275,Muribaculaceae,Paramuribaculum_sp001689565,RACS_045_sp013316135,UBA3282,UBA7173_sp001915385,UMGS1004_sp003343805	0.75	16	1	1
Multidrug resistance, efflux pump MepA	0.326925	0.567476	0.38243	control	M00705	Acetatifactor_sp011959105,COE1_sp002358575,COE1_sp009774375,Dubosiella_sp004793885	0.25	16	0	1
Pantothenate biosynthesis, valine/L-aspartate => pantothenate	0.326925	0.567476	0.38243	control	M00119	Alistipes,Muribaculaceae,Paramuribaculum_sp001689565,UBA7173_sp001915385	0.25	16	0	1
Pyruvate oxidation, pyruvate => acetyl-CoA	0.326925	0.567476	0.38243	test	M00307	Acetatifactor_sp011959105,Alistipes,CAG_56_sp004793585_REP1,COE1_sp002358575,COE1_sp009774375,Dubosiella_sp004793885,Muribaculaceae,Paramuribaculum_sp001689565,RACS_045_sp013316135,UBA11940_sp013316055,UBA7173_sp001915385,UMGS1004_sp003343805,UMGS1994_sp900553945	0.75	16	1	1
Succinate dehydrogenase, prokaryotes	0.326925	0.567476	0.38243	control	M00149	Alistipes,Muribaculaceae,Paramuribaculum_sp001689565,UBA7173_sp001915385	0.25	16	0	1
Valine/isoleucine biosynthesis, pyruvate => valine / 2-oxobutanoate => isoleucine	0.326925	0.567476	0.38243	test	M00019	Acetatifactor_sp011959105,CAG_56_sp004793585_REP1,COE1_sp002358575,COE1_sp009774375,Clostridia,Dubosiella_sp004793885,Kineothrix_sp000403275,Muribaculaceae,Paramuribaculum_sp001689565,RACS_045_sp013316135,UBA3282,UBA7173_sp001915385,UMGS1004_sp003343805	0.75	16	1	1
Adenine ribonucleotide biosynthesis, IMP => ADP,ATP	0.227679	0.633251	0.38243	test	M00049	Acetatifactor_sp011959105,Alistipes,CAG_56_sp004793585_REP1,COE1_sp002358575,COE1_sp009774375,Clostridia,Kineothrix_sp000403275,Muribaculaceae,Paramuribaculum_sp001689565,RACS_045_sp013316135,UBA11940_sp013316055,UBA3282,UBA7173_sp001915385,UMGS1004_sp003343805	0.8125	16	1	1
Coenzyme A biosynthesis, pantothenate => CoA	0.227679	0.633251	0.38243	test	M00120	Acetatifactor_sp011959105,Alistipes,CAG_56_sp004793585_REP1,COE1_sp002358575,COE1_sp009774375,Clostridia,Dubosiella_sp004793885,Kineothrix_sp000403275,Muribaculaceae,RACS_045_sp013316135,UBA11940_sp013316055,UBA3282,UBA7173_sp001915385,UMGS1004_sp003343805	0.8125	16	1	1
Glycolysis, core module involving three-carbon compounds	0.227679	0.633251	0.38243	test	M00002	Acetatifactor_sp011959105,Alistipes,CAG_56_sp004793585_REP1,COE1_sp002358575,COE1_sp009774375,Clostridia,Dubosiella_sp004793885,Kineothrix_sp000403275,Muribaculaceae,Paramuribaculum_sp001689565,UBA11940_sp013316055,UBA3282,UMGS1004_sp003343805,UMGS1994_sp900553945	0.8125	16	1	1
Guanine ribonucleotide biosynthesis IMP => GDP,GTP	0.227679	0.633251	0.38243	test	M00050	Acetatifactor_sp011959105,Alistipes,CAG_56_sp004793585_REP1,COE1_sp002358575,COE1_sp009774375,Clostridia,Dubosiella_sp004793885,Kineothrix_sp000403275,Muribaculaceae,Paramuribaculum_sp001689565,RACS_045_sp013316135,UBA3282,UBA7173_sp001915385,UMGS1004_sp003343805	0.8125	16	1	1
Uridine monophosphate biosynthesis, glutamine (+ PRPP) => UMP	0.227679	0.633251	0.38243	test	M00051	Acetatifactor_sp011959105,Alistipes,CAG_56_sp004793585_REP1,COE1_sp002358575,COE1_sp009774375,Clostridia,Dubosiella_sp004793885,Kineothrix_sp000403275,Muribaculaceae,Paramuribaculum_sp001689565,RACS_045_sp013316135,UBA11940_sp013316055,UBA3282,UMGS1004_sp003343805	0.8125	16	1	1
Acylglycerol degradation	0.227679	0.633251	0.38243	control	M00098	Clostridia,RACS_045_sp013316135,UBA3282	0.1875	16	0	1
Biotin biosynthesis, BioW pathway, pimelate => pimeloyl-CoA => biotin	0.227679	0.633251	0.38243	control	M00577	Muribaculaceae,Paramuribaculum_sp001689565,UBA7173_sp001915385	0.1875	16	0	1
Biotin biosynthesis, pimeloyl-ACP/CoA => biotin	0.227679	0.633251	0.38243	control	M00123	Muribaculaceae,Paramuribaculum_sp001689565,UBA7173_sp001915385	0.1875	16	0	1
Citrate cycle, second carbon oxidation, 2-oxoglutarate => oxaloacetate	0.227679	0.633251	0.38243	control	M00011	Alistipes,Muribaculaceae,UBA7173_sp001915385	0.1875	16	0	1
CMP-KDO biosynthesis	0.227679	0.633251	0.38243	control	M00063	Alistipes,Muribaculaceae,UBA7173_sp001915385	0.1875	16	0	1
NADH:quinone oxidoreductase, prokaryotes	0.227679	0.633251	0.38243	control	M00144	Muribaculaceae,Paramuribaculum_sp001689565,UBA7173_sp001915385	0.1875	16	0	1
Pyrimidine ribonucleotide biosynthesis, UMP => UDP/UTP,CDP/CTP	0.227679	0.633251	0.38243	control	M00052	Muribaculaceae,Paramuribaculum_sp001689565,UBA7173_sp001915385	0.1875	16	0	1
Tryptophan biosynthesis, chorismate => tryptophan	0.227679	0.633251	0.38243	control	M00023	COE1_sp002358575,COE1_sp009774375,UBA7173_sp001915385	0.1875	16	0	1
Vancomycin resistance, D-Ala-D-Ser type	0.227679	0.633251	0.38243	control	M00652	Acetatifactor_sp011959105,COE1_sp002358575,COE1_sp009774375	0.1875	16	0	1
Glycolysis (Embden-Meyerhof pathway), glucose => pyruvate	0.141667	0.70663	0.38243	test	M00001	Acetatifactor_sp011959105,Alistipes,CAG_56_sp004793585_REP1,COE1_sp002358575,COE1_sp009774375,Clostridia,Dubosiella_sp004793885,Kineothrix_sp000403275,Muribaculaceae,Paramuribaculum_sp001689565,RACS_045_sp013316135,UBA11940_sp013316055,UBA3282,UMGS1004_sp003343805,UMGS1994_sp900553945	0.875	16	1	1
Inosine monophosphate biosynthesis, PRPP + glutamine => IMP	0.141667	0.70663	0.38243	test	M00048	Acetatifactor_sp011959105,Alistipes,CAG_56_sp004793585_REP1,COE1_sp002358575,COE1_sp009774375,Clostridia,Dubosiella_sp004793885,Kineothrix_sp000403275,Muribaculaceae,Paramuribaculum_sp001689565,RACS_045_sp013316135,UBA11940_sp013316055,UBA3282,UBA7173_sp001915385,UMGS1004_sp003343805	0.875	16	1	1
Pentose phosphate pathway, non-oxidative phase, fructose 6P => ribose 5P	0.141667	0.70663	0.38243	test	M00007	Acetatifactor_sp011959105,Alistipes,CAG_56_sp004793585_REP1,COE1_sp002358575,COE1_sp009774375,Clostridia,Dubosiella_sp004793885,Kineothrix_sp000403275,Muribaculaceae,Paramuribaculum_sp001689565,RACS_045_sp013316135,UBA3282,UBA7173_sp001915385,UMGS1004_sp003343805,UMGS1994_sp900553945	0.875	16	1	1
Shikimate pathway, phosphoenolpyruvate + erythrose-4P => chorismate	0.141667	0.70663	0.38243	test	M00022	Acetatifactor_sp011959105,Alistipes,CAG_56_sp004793585_REP1,COE1_sp002358575,COE1_sp009774375,Clostridia,Dubosiella_sp004793885,Kineothrix_sp000403275,Muribaculaceae,Paramuribaculum_sp001689565,RACS_045_sp013316135,UBA11940_sp013316055,UBA3282,UBA7173_sp001915385,UMGS1004_sp003343805	0.875	16	1	1
KDO2-lipid A biosynthesis, Raetz pathway, LpxL-LpxM type	0.141667	0.70663	0.38243	control	M00060	Alistipes,Muribaculaceae	0.125	16	0	1
Lipoic acid biosynthesis, plants and bacteria, octanoyl-ACP => dihydrolipoyl-E2/H	0.141667	0.70663	0.38243	control	M00881	Alistipes,UBA7173_sp001915385	0.125	16	0	1
Pentose phosphate pathway (Pentose phosphate cycle)	0.141667	0.70663	0.38243	control	M00004	Acetatifactor_sp011959105,COE1_sp009774375	0.125	16	0	1
Polyamine biosynthesis, arginine => agmatine => putrescine => spermidine	0.141667	0.70663	0.38243	control	M00133	Acetatifactor_sp011959105,COE1_sp009774375	0.125	16	0	1
Propanoyl-CoA metabolism, propanoyl-CoA => succinyl-CoA	0.141667	0.70663	0.38243	control	M00741	Alistipes,Muribaculaceae	0.125	16	0	1
UDP-L-FucNAm biosynthesis	0.141667	0.70663	0.38243	control	M00923	Muribaculaceae,Paramuribaculum_sp001689565	0.125	16	0	1
ADP-L-glycero-D-manno-heptose biosynthesis	0.0664083	0.79664	0.399597	control	M00064	COE1_sp002358575	0.0625	16	0	1
Lysine biosynthesis, acetyl-DAP pathway, aspartate => lysine	0.0664083	0.79664	0.399597	control	M00525	UBA3282	0.0625	16	0	1
Nucleotide sugar biosynthesis, glucose => UDP-glucose	0.0664083	0.79664	0.399597	control	M00549	RACS_045_sp013316135	0.0625	16	0	1
Thiamine biosynthesis, archaea, AIR (+ NAD+) => TMP/TPP	0.0664083	0.79664	0.399597	control	M00896	Paramuribaculum_sp001689565	0.0625	16	0	1
V/A-type ATPase, prokaryotes	0.0664083	0.79664	0.399597	control	M00159	RACS_045_sp013316135	0.0625	16	0	1
PRPP biosynthesis, ribose 5P => PRPP	0.0664083	0.79664	0.399597	test	M00005	Acetatifactor_sp011959105,Alistipes,CAG_56_sp004793585_REP1,COE1_sp002358575,COE1_sp009774375,Clostridia,Dubosiella_sp004793885,Kineothrix_sp000403275,Muribaculaceae,Paramuribaculum_sp001689565,RACS_045_sp013316135,UBA11940_sp013316055,UBA3282,UBA7173_sp001915385,UMGS1004_sp003343805,UMGS1994_sp900553945	0.9375	16	1	1

## Sheet: CAG_56_sp004793585_REP2-enriche
KEGG_MODULE	enrichment_score	unadjusted_p_value	adjusted_q_value	associated_groups	accession	sample_ids	p_control	N_control	p_test	N_test
PRPP biosynthesis, ribose 5P => PRPP	17	3.73798e-05	0.00182651	control	M00005	Acetatifactor_sp011959105,Alistipes,CAG_56_sp004793585_REP1,COE1_sp002358575,COE1_sp009774375,Clostridia,Dubosiella_sp004793885,Kineothrix_sp000403275,Muribaculaceae,Paramuribaculum_sp001689565,RACS_045_sp013316135,UBA11940_sp013316055,UBA3282,UBA7173_sp001915385,UMGS1004_sp003343805,UMGS1994_sp900553945	1	16	0	1
Glycolysis (Embden-Meyerhof pathway), glucose => pyruvate	7.96885	0.00475893	0.0465077	control	M00001	Acetatifactor_sp011959105,Alistipes,CAG_56_sp004793585_REP1,COE1_sp002358575,COE1_sp009774375,Clostridia,Dubosiella_sp004793885,Kineothrix_sp000403275,Muribaculaceae,Paramuribaculum_sp001689565,RACS_045_sp013316135,UBA11940_sp013316055,UBA3282,UMGS1004_sp003343805,UMGS1994_sp900553945	0.9375	16	0	1
Inosine monophosphate biosynthesis, PRPP + glutamine => IMP	7.96885	0.00475893	0.0465077	control	M00048	Acetatifactor_sp011959105,Alistipes,CAG_56_sp004793585_REP1,COE1_sp002358575,COE1_sp009774375,Clostridia,Dubosiella_sp004793885,Kineothrix_sp000403275,Muribaculaceae,Paramuribaculum_sp001689565,RACS_045_sp013316135,UBA11940_sp013316055,UBA3282,UBA7173_sp001915385,UMGS1004_sp003343805	0.9375	16	0	1
Pentose phosphate pathway, non-oxidative phase, fructose 6P => ribose 5P	7.96885	0.00475893	0.0465077	control	M00007	Acetatifactor_sp011959105,Alistipes,CAG_56_sp004793585_REP1,COE1_sp002358575,COE1_sp009774375,Clostridia,Dubosiella_sp004793885,Kineothrix_sp000403275,Muribaculaceae,Paramuribaculum_sp001689565,RACS_045_sp013316135,UBA3282,UBA7173_sp001915385,UMGS1004_sp003343805,UMGS1994_sp900553945	0.9375	16	0	1
Shikimate pathway, phosphoenolpyruvate + erythrose-4P => chorismate	7.96885	0.00475893	0.0465077	control	M00022	Acetatifactor_sp011959105,Alistipes,CAG_56_sp004793585_REP1,COE1_sp002358575,COE1_sp009774375,Clostridia,Dubosiella_sp004793885,Kineothrix_sp000403275,Muribaculaceae,Paramuribaculum_sp001689565,RACS_045_sp013316135,UBA11940_sp013316055,UBA3282,UBA7173_sp001915385,UMGS1004_sp003343805	0.9375	16	0	1
Adenine ribonucleotide biosynthesis, IMP => ADP,ATP	4.95833	0.0259652	0.126875	control	M00049	Acetatifactor_sp011959105,Alistipes,CAG_56_sp004793585_REP1,COE1_sp002358575,COE1_sp009774375,Clostridia,Kineothrix_sp000403275,Muribaculaceae,Paramuribaculum_sp001689565,RACS_045_sp013316135,UBA11940_sp013316055,UBA3282,UBA7173_sp001915385,UMGS1004_sp003343805	0.875	16	0	1
Coenzyme A biosynthesis, pantothenate => CoA	4.95833	0.0259652	0.126875	control	M00120	Acetatifactor_sp011959105,Alistipes,CAG_56_sp004793585_REP1,COE1_sp002358575,COE1_sp009774375,Clostridia,Dubosiella_sp004793885,Kineothrix_sp000403275,Muribaculaceae,RACS_045_sp013316135,UBA11940_sp013316055,UBA3282,UBA7173_sp001915385,UMGS1004_sp003343805	0.875	16	0	1
Glycolysis, core module involving three-carbon compounds	4.95833	0.0259652	0.126875	control	M00002	Acetatifactor_sp011959105,Alistipes,CAG_56_sp004793585_REP1,COE1_sp002358575,COE1_sp009774375,Clostridia,Dubosiella_sp004793885,Kineothrix_sp000403275,Muribaculaceae,Paramuribaculum_sp001689565,UBA11940_sp013316055,UBA3282,UMGS1004_sp003343805,UMGS1994_sp900553945	0.875	16	0	1
Guanine ribonucleotide biosynthesis IMP => GDP,GTP	4.95833	0.0259652	0.126875	control	M00050	Acetatifactor_sp011959105,Alistipes,CAG_56_sp004793585_REP1,COE1_sp002358575,COE1_sp009774375,Clostridia,Dubosiella_sp004793885,Kineothrix_sp000403275,Muribaculaceae,Paramuribaculum_sp001689565,RACS_045_sp013316135,UBA3282,UBA7173_sp001915385,UMGS1004_sp003343805	0.875	16	0	1
Uridine monophosphate biosynthesis, glutamine (+ PRPP) => UMP	4.95833	0.0259652	0.126875	control	M00051	Acetatifactor_sp011959105,Alistipes,CAG_56_sp004793585_REP1,COE1_sp002358575,COE1_sp009774375,Clostridia,Dubosiella_sp004793885,Kineothrix_sp000403275,Muribaculaceae,Paramuribaculum_sp001689565,RACS_045_sp013316135,UBA11940_sp013316055,UBA3282,UMGS1004_sp003343805	0.875	16	0	1
C5 isoprenoid biosynthesis, non-mevalonate pathway	3.45313	0.0631323	0.205658	control	M00096	Acetatifactor_sp011959105,Alistipes,CAG_56_sp004793585_REP1,COE1_sp002358575,COE1_sp009774375,Clostridia,Kineothrix_sp000403275,Muribaculaceae,Paramuribaculum_sp001689565,RACS_045_sp013316135,UBA3282,UBA7173_sp001915385,UMGS1004_sp003343805	0.8125	16	0	1
Isoleucine biosynthesis, threonine => 2-oxobutanoate => isoleucine	3.45313	0.0631323	0.205658	control	M00570	Acetatifactor_sp011959105,CAG_56_sp004793585_REP1,COE1_sp002358575,COE1_sp009774375,Clostridia,Dubosiella_sp004793885,Kineothrix_sp000403275,Muribaculaceae,Paramuribaculum_sp001689565,RACS_045_sp013316135,UBA3282,UBA7173_sp001915385,UMGS1004_sp003343805	0.8125	16	0	1
Leucine biosynthesis, 2-oxoisovalerate => 2-oxoisocaproate	3.45313	0.0631323	0.205658	control	M00432	Acetatifactor_sp011959105,CAG_56_sp004793585_REP1,COE1_sp002358575,COE1_sp009774375,Clostridia,Dubosiella_sp004793885,Kineothrix_sp000403275,Muribaculaceae,Paramuribaculum_sp001689565,RACS_045_sp013316135,UBA3282,UBA7173_sp001915385,UMGS1004_sp003343805	0.8125	16	0	1
Pyruvate oxidation, pyruvate => acetyl-CoA	3.45313	0.0631323	0.205658	control	M00307	Acetatifactor_sp011959105,Alistipes,CAG_56_sp004793585_REP1,COE1_sp002358575,COE1_sp009774375,Dubosiella_sp004793885,Muribaculaceae,Paramuribaculum_sp001689565,RACS_045_sp013316135,UBA11940_sp013316055,UBA7173_sp001915385,UMGS1004_sp003343805,UMGS1994_sp900553945	0.8125	16	0	1
Valine/isoleucine biosynthesis, pyruvate => valine / 2-oxobutanoate => isoleucine	3.45313	0.0631323	0.205658	control	M00019	Acetatifactor_sp011959105,CAG_56_sp004793585_REP1,COE1_sp002358575,COE1_sp009774375,Clostridia,Dubosiella_sp004793885,Kineothrix_sp000403275,Muribaculaceae,Paramuribaculum_sp001689565,RACS_045_sp013316135,UBA3282,UBA7173_sp001915385,UMGS1004_sp003343805	0.8125	16	0	1
dTDP-L-rhamnose biosynthesis	2.55	0.110294	0.244972	control	M00793	Acetatifactor_sp011959105,Alistipes,CAG_56_sp004793585_REP1,COE1_sp002358575,COE1_sp009774375,Clostridia,Kineothrix_sp000403275,Muribaculaceae,Paramuribaculum_sp001689565,UBA11940_sp013316055,UBA3282,UBA7173_sp001915385	0.75	16	0	1
Gluconeogenesis, oxaloacetate => fructose-6P	2.55	0.110294	0.244972	control	M00003	Acetatifactor_sp011959105,Alistipes,CAG_56_sp004793585_REP1,COE1_sp002358575,COE1_sp009774375,Clostridia,Kineothrix_sp000403275,Muribaculaceae,Paramuribaculum_sp001689565,RACS_045_sp013316135,UBA3282,UMGS1004_sp003343805	0.75	16	0	1
Glycogen degradation, glycogen => glucose-6P	2.55	0.110294	0.244972	control	M00855	Acetatifactor_sp011959105,CAG_56_sp004793585_REP1,COE1_sp002358575,COE1_sp009774375,Clostridia,Dubosiella_sp004793885,Kineothrix_sp000403275,Muribaculaceae,RACS_045_sp013316135,UBA3282,UBA7173_sp001915385,UMGS1004_sp003343805	0.75	16	0	1
Histidine biosynthesis, PRPP => histidine	2.55	0.110294	0.244972	control	M00026	Acetatifactor_sp011959105,CAG_56_sp004793585_REP1,COE1_sp002358575,COE1_sp009774375,Clostridia,Dubosiella_sp004793885,Kineothrix_sp000403275,Muribaculaceae,RACS_045_sp013316135,UBA3282,UBA7173_sp001915385,UMGS1004_sp003343805	0.75	16	0	1
Lysine biosynthesis, DAP aminotransferase pathway, aspartate => lysine	2.55	0.110294	0.244972	control	M00527	Acetatifactor_sp011959105,CAG_56_sp004793585_REP1,COE1_sp002358575,COE1_sp009774375,Clostridia,Kineothrix_sp000403275,Muribaculaceae,Paramuribaculum_sp001689565,RACS_045_sp013316135,UBA3282,UBA7173_sp001915385,UMGS1004_sp003343805	0.75	16	0	1
Lysine biosynthesis, DAP dehydrogenase pathway, aspartate => lysine	2.55	0.110294	0.244972	control	M00526	Acetatifactor_sp011959105,CAG_56_sp004793585_REP1,COE1_sp002358575,COE1_sp009774375,Clostridia,Kineothrix_sp000403275,Muribaculaceae,Paramuribaculum_sp001689565,RACS_045_sp013316135,UBA3282,UBA7173_sp001915385,UMGS1004_sp003343805	0.75	16	0	1
Threonine biosynthesis, aspartate => homoserine => threonine	2.55	0.110294	0.244972	control	M00018	Acetatifactor_sp011959105,CAG_56_sp004793585_REP1,COE1_sp002358575,COE1_sp009774375,Clostridia,Dubosiella_sp004793885,Kineothrix_sp000403275,Muribaculaceae,Paramuribaculum_sp001689565,RACS_045_sp013316135,UBA3282,UMGS1004_sp003343805	0.75	16	0	1
Cysteine biosynthesis, serine => cysteine	1.94795	0.162808	0.305977	control	M00021	CAG_56_sp004793585_REP1,COE1_sp002358575,COE1_sp009774375,Clostridia,Kineothrix_sp000403275,Muribaculaceae,Paramuribaculum_sp001689565,RACS_045_sp013316135,UBA3282,UBA7173_sp001915385,UMGS1004_sp003343805	0.6875	16	0	1
F-type ATPase, prokaryotes and chloroplasts	1.94795	0.162808	0.305977	control	M00157	Acetatifactor_sp011959105,CAG_56_sp004793585_REP1,COE1_sp002358575,COE1_sp009774375,Clostridia,Dubosiella_sp004793885,Kineothrix_sp000403275,Muribaculaceae,Paramuribaculum_sp001689565,UBA3282,UBA7173_sp001915385	0.6875	16	0	1
Glycogen biosynthesis, glucose-1P => glycogen/starch	1.94795	0.162808	0.305977	control	M00854	Acetatifactor_sp011959105,CAG_56_sp004793585_REP1,COE1_sp002358575,COE1_sp009774375,Clostridia,Dubosiella_sp004793885,Kineothrix_sp000403275,RACS_045_sp013316135,UBA11940_sp013316055,UBA3282,UMGS1004_sp003343805	0.6875	16	0	1
Semi-phosphorylative Entner-Doudoroff pathway, gluconate => glycerate-3P	1.94795	0.162808	0.305977	control	M00308	Acetatifactor_sp011959105,Alistipes,CAG_56_sp004793585_REP1,COE1_sp002358575,COE1_sp009774375,Clostridia,Dubosiella_sp004793885,Muribaculaceae,RACS_045_sp013316135,UBA3282,UMGS1004_sp003343805	0.6875	16	0	1
beta-Oxidation, acyl-CoA synthesis	1.51786	0.217943	0.380339	control	M00086	Alistipes,CAG_56_sp004793585_REP1,COE1_sp002358575,COE1_sp009774375,Dubosiella_sp004793885,Muribaculaceae,Paramuribaculum_sp001689565,RACS_045_sp013316135,UBA7173_sp001915385,UMGS1994_sp900553945	0.625	16	0	1
D-Glucuronate degradation, D-glucuronate => pyruvate + D-glyceraldehyde 3P	1.51786	0.217943	0.380339	control	M00061	Acetatifactor_sp011959105,Alistipes,COE1_sp002358575,COE1_sp009774375,Clostridia,Dubosiella_sp004793885,Muribaculaceae,RACS_045_sp013316135,UBA3282,UMGS1004_sp003343805	0.625	16	0	1
C1-unit interconversion, prokaryotes	1.19531	0.274261	0.406102	control	M00140	Acetatifactor_sp011959105,CAG_56_sp004793585_REP1,COE1_sp002358575,COE1_sp009774375,Clostridia,Kineothrix_sp000403275,RACS_045_sp013316135,UBA3282,UMGS1004_sp003343805	0.5625	16	0	1
Galactose degradation, Leloir pathway, galactose => alpha-D-glucose-1P	1.19531	0.274261	0.406102	control	M00632	Acetatifactor_sp011959105,Alistipes,CAG_56_sp004793585_REP1,Clostridia,Kineothrix_sp000403275,Muribaculaceae,Paramuribaculum_sp001689565,UBA3282,UBA7173_sp001915385	0.5625	16	0	1
Lysine biosynthesis, succinyl-DAP pathway, aspartate => lysine	1.19531	0.274261	0.406102	control	M00016	CAG_56_sp004793585_REP1,COE1_sp002358575,COE1_sp009774375,Clostridia,Kineothrix_sp000403275,Muribaculaceae,RACS_045_sp013316135,UBA3282,UMGS1004_sp003343805	0.5625	16	0	1
Ornithine biosynthesis, glutamate => ornithine	1.19531	0.274261	0.406102	control	M00028	Acetatifactor_sp011959105,CAG_56_sp004793585_REP1,COE1_sp002358575,COE1_sp009774375,Clostridia,Kineothrix_sp000403275,Muribaculaceae,RACS_045_sp013316135,UBA3282	0.5625	16	0	1
UDP-N-acetyl-D-glucosamine biosynthesis, prokaryotes, glucose => UDP-GlcNAc	1.19531	0.274261	0.406102	control	M00909	Acetatifactor_sp011959105,COE1_sp002358575,COE1_sp009774375,Clostridia,Dubosiella_sp004793885,Kineothrix_sp000403275,RACS_045_sp013316135,UBA3282,UMGS1004_sp003343805	0.5625	16	0	1
[truncated: 49 more rows]

## Sheet: Clostridia-enriched
KEGG_MODULE	enrichment_score	unadjusted_p_value	adjusted_q_value	associated_groups	accession	sample_ids	p_control	N_control	p_test	N_test
[truncated: 82 more rows]

## Sheet: COE1_sp002358575-enriched
KEGG_MODULE	enrichment_score	unadjusted_p_value	adjusted_q_value	associated_groups	accession	sample_ids	p_control	N_control	p_test	N_test
[truncated: 82 more rows]

[truncated: 12 more sheets: COE1_sp009774375-enriched, Dubosiella_sp004793885-enriched, Kineothrix_sp000403275-enriched, Muribaculaceae-enriched, Paramuribaculum_sp001689565-enr, RACS_045_sp013316135-enriched, UBA3282-enriched, UBA7173_sp001915385-enriched, UBA11940_sp013316055-enriched, UMGS1004_sp003343805-enriched, UMGS1994_sp900553945-enriched, heatmap]
