# Supplementary material for: Degenerative Cervical Myelopathy induces sex-specific dysbiosis in mice
Source: Front Microbiol. 2023 Oct 20;14:1229783. doi: 10.3389/fmicb.2023.1229783 (PMC10623434; doi:10.3389/fmicb.2023.1229783)
Supplement: Supplementary file 8 [file Table_8.XLSX]

## Sheet: male_control_matrix
Name	Acetatifactor_sp011959105	COE1_sp002358575	Dubosiella_sp004793885	RACS_045_sp013316135	UBA3282	UBA7173_sp001915385	UMGS1004_sp003343805	UMGS1994_sp900553945
&beta;-(1,4)-mannan degradation	1	1	0	0	0	0	0	0
&beta;-1,4-D-mannosyl-N-acetyl-D-glucosamine degradation	1	1	0	0	1	0	0	0
&beta;-D-glucuronide and D-glucuronate degradation	1	1	1	0	1	0	0	0
(1,4)-&beta;-D-xylan degradation	1	1	0	0	0	0	0	0
(3S)-linalool biosynthesis	1	1	0	1	1	1	0	1
(5Z)-dodecenoate biosynthesis II	0	1	0	0	0	0	0	0
(R,R)-butanediol biosynthesis	0	0	0	0	0	1	0	0
(R,R)-butanediol degradation	0	0	0	0	0	1	0	0
2-aminoethylphosphonate biosynthesis	1	0	0	0	0	0	0	0
2-deoxy-&alpha;-D-ribose 1-phosphate degradation	0	0	0	0	1	0	0	0
3-(4-hydroxyphenyl)pyruvate biosynthesis	1	1	1	1	1	1	1	0
3-dehydroquinate biosynthesis I	1	0	1	1	0	0	0	0
3-hydroxybutyryl-CoA dehydrogenase	1	1	0	0	1	0	0	0
4-deoxy-L-threo-hex-4-enopyranuronate degradation	1	1	0	0	1	0	0	0
5-aminoimidazole ribonucleotide biosynthesis I	1	1	1	1	1	0	1	0
5-aminoimidazole ribonucleotide biosynthesis II	1	1	1	1	1	0	1	0
6-hydroxymethyl-dihydropterin diphosphate biosynthesis I	1	0	0	0	0	0	0	0
6-hydroxymethyl-dihydropterin diphosphate biosynthesis IV (Plasmodium)	1	0	0	0	0	0	0	0
ATP biosynthesis	0	1	0	0	1	1	0	0
Agmatine extracellular biosynthesis	0	0	0	0	0	1	0	0
CDP-4-dehydro-3,6-dideoxy-D-glucose biosynthesis	0	0	0	0	1	0	0	0
CDP-D-arabitol biosynthesis	1	0	0	0	0	0	0	0
CDP-D-mannitol biosynthesis	0	0	0	0	1	0	0	0
CMP phosphorylation	1	1	0	0	0	0	0	0
Coupled NADP reduction via ferredoxin and NADH	1	1	1	1	1	1	1	0
D-arabinose degradation I	0	0	0	1	1	1	0	0
D-fructuronate degradation	1	1	0	0	0	0	0	0
D-galactose degradation I (Leloir pathway)	1	1	0	0	1	1	1	0
D-galactose detoxification	0	0	0	0	1	0	0	0
D-galacturonate degradation I	1	1	1	0	1	0	0	0
D-gluconate degradation	1	1	1	0	1	0	1	0
D-malate degradation	0	0	0	1	0	0	0	0
Electron bifurcating LDH/Etf complex	0	0	1	0	0	0	0	0
Entner-Doudoroff shunt	1	1	0	0	0	0	0	0
Folate biosynthesis from GTP and 4-aminobenzoate via dihydropterin-3-triphosphate	1	0	0	0	1	0	0	0
GDP-6-deoxy-D-talose biosynthesis	1	1	0	0	1	1	0	0
GDP-D-perosamine biosynthesis	1	1	0	0	1	1	0	0
GDP-D-rhamnose biosynthesis	1	1	0	0	1	1	0	0
GDP-L-colitose biosynthesis	0	0	0	0	1	0	0	0
GDP-L-fucose biosynthesis I (from GDP-D-mannose)	1	1	0	0	1	1	0	0
GDP-mannose biosynthesis	0	0	0	0	1	0	1	0
L-alanine biosynthesis II	0	0	1	0	0	1	0	0
L-alanine biosynthesis III	1	1	1	1	1	1	1	0
L-alanine degradation III	0	0	1	0	0	1	0	0
L-alanine degradation IV	0	0	0	0	0	1	0	0
L-arabinose degradation II	1	0	0	0	0	0	0	0
L-arginine biosynthesis II (acetyl cycle)	1	1	0	1	1	0	1	0
L-arginine biosynthesis IV (archaea)	1	1	0	1	1	1	0	0
L-arginine degradation IV (arginine decarboxylase/agmatine deiminase pathway)	0	0	0	0	0	1	0	0
L-asparagine biosynthesis I	1	1	1	1	1	0	1	1
L-asparagine biosynthesis II	1	1	1	1	1	1	1	0
L-asparagine biosynthesis III (tRNA-dependent)	1	1	1	0	1	0	0	0
L-asparagine degradation I	1	0	1	0	1	1	1	0
L-asparagine degradation III (mammalian)	0	0	1	0	0	0	0	0
L-aspartate biosynthesis	1	1	1	1	1	1	1	0
L-aspartate degradation I	1	1	1	1	1	1	1	0
L-citrulline degradation	0	1	0	0	1	0	0	0
L-cysteine biosynthesis I	0	1	0	1	1	1	1	0
L-cysteine biosynthesis III (from L-homocysteine)	0	0	1	0	0	0	0	0
L-cysteine biosynthesis VII (from S-sulfo-L-cysteine)	0	1	0	1	1	1	1	0
L-cysteine degradation II	1	1	1	1	1	1	1	0
L-glutamate biosynthesis I	1	0	0	1	0	1	0	0
L-glutamate biosynthesis II	1	1	0	1	1	1	1	0
L-glutamate biosynthesis III	1	1	1	1	1	1	1	0
L-glutamate biosynthesis IV	1	1	1	1	1	1	1	1
L-glutamate biosynthesis V	0	1	1	0	1	1	0	0
L-glutamate degradation I	1	1	0	1	1	1	1	0
L-glutamate degradation II	0	0	1	0	0	0	0	0
L-glutamate degradation IX (via 4-aminobutanoate)	0	0	0	0	0	1	0	0
L-glutamate degradation X	1	1	0	1	1	1	1	0
L-glutamine biosynthesis I	1	1	1	1	1	0	1	0
L-glutamine biosynthesis III	0	1	1	0	0	0	0	0
L-glutamine degradation I	1	0	0	1	0	1	0	0
L-glutamine degradation II	1	1	1	1	1	1	0	0
L-gulonate degradation	0	0	0	0	0	1	0	0
L-histidine biosynthesis	0	0	1	1	1	1	1	0
L-homoserine biosynthesis	0	1	0	1	1	0	0	0
L-isoleucine biosynthesis I (from threonine)	1	1	1	1	1	1	1	0
L-isoleucine biosynthesis II	1	1	0	0	1	0	1	0
L-lactaldehyde degradation (anaerobic)	0	1	1	1	1	0	1	1
L-leucine biosynthesis	1	1	1	1	1	1	1	0
L-lysine biosynthesis II	0	0	1	0	0	0	0	0
L-lysine biosynthesis III	1	1	0	0	0	1	0	0
L-lysine biosynthesis VI	1	1	1	1	1	0	1	0
L-lyxose degradation	0	0	0	0	1	0	0	0
L-malate degradation I	1	1	1	1	1	1	0	0
L-malate degradation II	1	1	1	1	1	1	0	0
L-methionine biosynthesis I	1	1	0	0	1	1	0	0
L-methionine biosynthesis II	0	0	1	0	0	0	0	0
L-methionine degradation II	1	1	1	1	1	1	1	0
L-ornithine biosynthesis I	1	1	0	1	1	1	0	0
L-ornithine biosynthesis II	1	1	0	0	0	1	0	0
L-proline biosynthesis I (from L-glutamate)	1	1	0	0	0	0	0	0
L-proline biosynthesis III (from L-ornithine)	1	1	0	0	1	0	0	0
L-rhamnose degradation I	0	0	0	0	0	0	1	0
L-serine degradation	1	1	1	1	1	1	1	0
L-threonine biosynthesis	0	0	1	0	0	0	0	0
L-threonine degradation I	1	1	0	1	1	0	0	0
L-threonine degradation IV	0	0	0	1	1	0	1	0
L-tyrosine biosynthesis I	0	1	0	0	1	1	0	0
L-valine biosynthesis	1	1	0	1	1	0	0	0
N-acetyl-D-galactosamine degradation	0	0	0	1	1	0	0	0
N-acetylglucosamine degradation I	1	1	0	0	1	0	1	0
N-acetylglutaminylglutamine amide biosynthesis	0	1	0	0	1	0	0	1
N-end rule pathway I (prokaryotic)	1	1	0	0	0	0	0	0
N6-L-threonylcarbamoyladenosine37-modified tRNA biosynthesis	1	1	0	1	1	0	1	1
NAD salvage pathway V (PNC V cycle)	0	0	0	0	1	0	0	0
NADH repair (prokaryotes)	1	0	0	1	1	1	0	0
NADH to cytochrome bd oxidase electron transfer I	0	0	0	0	0	1	0	0
NADH to cytochrome bo oxidase electron transfer I	0	0	0	0	0	1	0	0
NADP biosynthesis	1	1	0	0	1	1	0	0
NADPH repair (prokaryotes)	1	0	0	1	1	1	0	0
Na(+)-translocating ATPase	1	1	1	1	1	1	0	0
Na(+)-translocating ferredoxin:NAD(+) oxidoreductase complex	1	1	0	0	1	1	0	0
PRPP biosynthesis	0	0	1	0	0	1	1	1
Phosphate ABC transporter	1	1	1	1	1	1	1	1
Pyruvate-ferredoxin oxidorectase to acetyl-CoA	0	0	1	1	0	1	0	0
S-adenosyl-L-methionine biosynthesis	1	1	0	1	1	1	1	1
S-adenosyl-L-methionine salvage II	0	0	0	0	1	0	0	0
S-methyl-5'-thioadenosine degradation IV	0	0	1	0	0	0	0	0
TCA cycle II (plants and fungi)	0	0	0	0	0	1	0	0
Threonine biosynthis from aspartate via homoserine (gapseq)	0	1	1	1	1	0	0	0
UDP-&alpha;-D-galactose biosynthesis	1	1	1	1	1	1	1	0
UDP-&alpha;-D-galacturonate biosynthesis I (from UDP-D-glucuronate)	0	1	0	0	1	1	0	0
UDP-&alpha;-D-glucose biosynthesis	0	1	0	1	1	0	0	0
UDP-&alpha;-D-glucuronate biosynthesis (from UDP-glucose)	0	1	0	0	1	1	0	0
UDP-&beta;-L-arabinose biosynthesis I (from UDP-&alpha;-D-xylose)	1	1	1	1	1	0	1	0
UDP-N-acetyl-&alpha;-D-galactosaminuronate biosynthesis	0	1	0	0	1	0	0	0
UDP-N-acetyl-&alpha;-D-quinovosamine biosynthesis	1	1	0	0	1	0	0	0
UDP-N-acetyl-D-galactosamine biosynthesis I	1	1	1	1	1	1	1	0
UDP-N-acetyl-D-galactosamine biosynthesis II	0	1	0	0	0	0	0	0
UDP-N-acetyl-D-glucosamine biosynthesis I	0	0	1	0	0	0	0	1
UDP-N-acetylmuramoyl-pentapeptide biosynthesis I (meso-diaminopimelate containing)	1	1	0	0	1	0	0	0
UDP-N-acetylmuramoyl-pentapeptide biosynthesis II (lysine-containing)	1	1	0	0	1	0	0	0
UMP biosynthesis II	1	1	1	1	1	0	1	0
UMP biosynthesis III	1	1	1	1	1	0	1	0
UTP and CTP de novo biosynthesis	1	1	0	0	0	0	0	0
acetate and ATP formation from acetyl-CoA I	1	1	0	1	1	1	1	1
acetate formation from acetyl-CoA (succinate)	1	1	0	0	0	1	0	0
acetoin degradation	0	0	0	0	0	1	0	0
acetyl-CoA fermentation to butanoate clostridia	1	1	0	0	0	1	0	0
adenine and adenosine salvage I	1	1	0	0	0	0	0	0
adenine salvage	0	0	1	0	0	0	0	0
adenosine deoxyribonucleotides de novo biosynthesis II	0	0	1	0	0	0	0	0
adenosine ribonucleotides de novo biosynthesis	1	1	0	1	0	1	1	0
alanine racemization	1	1	1	1	1	1	0	0
ammonia assimilation cycle II	0	1	1	0	1	0	0	0
arginine dependent acid resistance	0	1	0	0	0	1	0	0
bergamotene biosynthesis I	1	1	0	1	1	1	1	1
biotin biosynthesis from 8-amino-7-oxononanoate I	0	1	0	0	0	1	0	0
biotin biosynthesis from 8-amino-7-oxononanoate II	0	0	0	0	0	1	0	0
cellulose degradation II (fungi)	1	0	0	0	0	0	0	0
choline degradation III	0	0	1	0	1	0	0	0
chorismate biosynthesis from 3-dehydroquinate	0	0	1	0	0	0	0	0
coenzyme A biosynthesis I (prokaryotic)	0	0	0	0	1	0	0	0
coenzyme A biosynthesis II (eukaryotic)	0	0	0	0	1	0	0	0
cyanide degradation	1	1	1	1	1	1	1	0
cyclohexane-1-carboxylate degradation (anaerobic)	0	1	0	0	1	0	0	0
di-trans,poly-cis-undecaprenyl phosphate biosynthesis	1	1	0	0	1	1	0	0
dipyrromethane cofactor biosynthesis	0	0	1	0	0	0	0	0
ethene biosynthesis III (microbes)	0	0	0	0	0	1	0	0
ethylene glycol degradation	0	0	0	0	0	0	0	1
fatty acid &beta;-oxidation I (generic)	1	0	0	0	0	0	0	0
fatty acid &beta;-oxidation III (unsaturated, odd number)	1	0	0	0	0	0	0	0
fatty acid biosynthesis initiation (type I)	1	1	0	0	1	1	0	1
fatty acid biosynthesis initiation (type II)	1	1	0	0	0	1	0	0
fatty acid elongation -- saturated	1	1	0	0	0	0	0	1
flavin salvage	0	0	1	0	0	0	0	0
folate polyglutamylation	1	0	0	1	1	0	0	1
formaldehyde assimilation III (dihydroxyacetone cycle)	0	0	0	0	0	0	1	0
formaldehyde oxidation VII (THF pathway)	0	0	0	0	0	1	0	0
formate assimilation into 5,10-methylenetetrahydrofolate	1	1	1	1	1	0	1	1
fructose degradation	1	1	0	0	0	0	0	0
fucose degradation	0	0	0	1	1	1	0	0
galactitol degradation	0	0	0	0	1	0	0	0
geranyl diphosphate biosynthesis	1	1	0	1	1	1	0	1
geranylgeranyl diphosphate biosynthesis	1	1	0	1	1	0	0	0
ginsenoside degradation III	0	0	1	1	1	1	1	0
glutaminyl-tRNAgln biosynthesis via transamidation	1	0	0	0	0	0	0	0
glutaryl-CoA degradation	1	1	0	0	1	0	0	0
glycine biosynthesis I	1	1	0	1	1	1	1	0
glycine biosynthesis II	0	0	0	0	0	1	0	0
glycine biosynthesis III	1	1	1	1	1	1	1	0
glycine biosynthesis IV	1	1	0	1	1	1	1	0
glycine cleavage	0	0	0	0	0	1	0	0
glycogen biosynthesis I (from ADP-D-Glucose)	1	1	1	1	1	0	1	0
glycogen degradation I	1	1	0	0	1	0	0	0
glycogen degradation II	0	1	0	0	0	1	0	0
glycolysis I (from glucose 6-phosphate)	0	1	0	0	1	0	0	0
glycolysis II (from fructose 6-phosphate)	0	1	0	0	1	0	0	0
glycolysis III (from glucose)	0	1	0	0	0	0	0	0
guanine and guanosine salvage	0	1	1	0	0	0	0	0
guanine and guanosine salvage II	0	0	1	0	0	0	0	0
guanosine deoxyribonucleotides de novo biosynthesis II	0	0	1	0	0	0	0	0
homocysteine and cysteine interconversion	0	0	1	0	0	0	0	0
hydrogen production I	0	0	0	0	0	0	1	1
hydrogen production III	0	0	0	0	0	1	0	0
hydrogen production VIII	0	0	0	0	0	1	0	0
hydroxymethylpyrimidine salvage	1	0	0	0	0	1	0	0
inosine-5'-phosphate biosynthesis at high carbonate levels	0	0	1	0	0	0	0	0
lactose degradation III	1	1	0	1	1	1	1	0
laminaribiose degradation	0	1	0	0	0	0	0	0
leucyl aminopeptidase test	0	1	0	0	0	0	0	0
linezolid resistance	1	0	1	0	1	0	0	0
long-chain fatty acid activation	0	1	0	1	1	1	0	0
lotaustralin degradation	0	0	1	0	0	0	0	0
magnoflorine biosynthesis	1	1	1	1	1	1	1	0
malate/L-aspartate shuttle pathway	0	0	0	0	0	1	0	0
mannitol degradation I	0	1	1	0	0	0	0	0
melibiose degradation	1	1	0	1	1	1	1	0
menaquinol-4 biosynthesis I	0	0	0	0	0	1	0	0
menaquinol-6 biosynthesis	0	0	0	0	0	1	0	0
menaquinol-8 biosynthesis	0	0	0	0	0	1	0	0
menaquinol-9 biosynthesis	0	0	0	0	0	1	0	0
methanol oxidation to formaldehyde IV	0	0	0	0	0	0	1	0
methyl parathion degradation	1	0	0	0	0	0	0	0
methylerythritol phosphate pathway I	1	1	0	1	1	1	1	0
methylerythritol phosphate pathway II	1	1	0	1	1	1	1	0
methylglyoxal degradation III	0	0	0	1	1	1	1	0
myo-inositol degradation I	0	0	0	1	0	0	0	0
nitric oxide biosynthesis I (plants)	0	0	1	0	0	0	0	0
oxalate degradation I	0	0	0	0	0	0	0	1
oxalate degradation II	0	0	0	0	0	1	0	0
oxalate degradation IV	1	1	1	1	1	1	1	0
palmitate biosynthesis (type I fatty acid synthase)	1	1	1	1	1	1	0	1
pentose phosphate pathway (non-oxidative branch) II	0	0	0	0	0	1	1	0
pentose phosphate pathway (partial)	0	0	0	0	0	1	1	0
peptidoglycan biosynthesis I (meso-diaminopimelate containing)	1	1	0	0	1	0	0	0
phosphate acquisition	0	0	1	0	0	1	0	0
phosphatidylcholine biosynthesis II	0	0	0	0	1	0	0	0
ppGpp metabolism	1	1	0	0	0	0	0	0
protein N-glycosylation processing phase (plants and animals)	0	0	0	0	0	1	0	0
purine ribonucleosides degradation	1	1	1	0	1	0	0	0
putrescine biosynthesis II	0	0	0	0	0	1	0	0
pyridoxal 5'-phosphate biosynthesis I	0	0	0	0	0	1	0	0
pyrimidine nucleobases salvage I	1	1	1	0	0	1	1	0
pyruvate decarboxylation to acetyl CoA II	0	0	1	1	0	1	0	0
pyruvate fermentation to (R)-acetoin I	0	0	1	0	0	0	0	0
pyruvate fermentation to (S)-lactate	0	1	1	0	0	0	0	1
pyruvate fermentation to acetate II	1	1	0	1	1	1	1	1
pyruvate fermentation to butanoate	1	1	0	0	1	0	0	0
pyruvate fermentation to propanoate I	0	0	0	0	0	1	0	0
pyruvate to cytochrome bd oxidase electron transfer	0	0	0	0	0	1	0	0
pyruvate to cytochrome bo oxidase electron transfer	0	0	0	0	0	1	0	0
queuosine biosynthesis II (queuine salvage)	1	1	0	1	1	1	0	1
queuosine biosynthesis III (queuosine salvage)	1	1	0	1	1	1	0	1
sedoheptulose bisphosphate bypass	1	1	0	1	1	1	1	0
seleno-amino acid biosynthesis (plants)	0	1	0	1	1	1	1	0
seleno-amino acid detoxification and volatilization I	1	0	0	1	0	0	0	0
serine racemization	1	1	1	0	0	0	0	0
siroheme biosynthesis	0	1	0	0	0	0	0	0
spermidine biosynthesis II	1	0	0	0	0	1	0	0
spermidine biosynthesis II (only one key enzyme)	1	0	0	1	0	1	0	0
stachyose degradation	0	1	0	0	1	0	0	0
starch degradation V	1	1	1	1	1	0	1	0
stearate biosynthesis III (fungi)	0	1	0	1	1	1	0	1
succinate to cytochrome bd oxidase electron transfer	0	0	0	0	0	1	0	0
succinate to cytochrome bo oxidase electron transfer	0	0	0	0	0	1	0	0
succinoglycan biosynthesis	1	1	1	1	1	1	0	0
sucrose degradation I (sucrose phosphotransferase)	0	0	1	0	0	0	0	0
sucrose degradation III (sucrose invertase)	0	1	0	0	0	1	0	0
sulfoacetaldehyde degradation I	1	1	0	1	1	1	1	0
sulfur reduction III	0	0	0	0	0	1	0	0
tRNA charging	1	1	0	1	1	1	1	1
tetrahydrofolate biosynthesis	1	0	0	0	1	0	0	0
tetrahydrofolate salvage from 5,10-methenyltetrahydrofolate	0	1	0	0	1	0	0	0
trans, trans-farnesyl diphosphate biosynthesis	1	1	0	1	1	0	0	0
trehalose biosynthesis IV	1	1	1	1	1	0	0	0
trehalose biosynthesis VII	1	1	1	1	1	0	0	0
trehalose degradation I (low osmolarity)	0	1	0	0	0	0	0	0
triclosan resistance	1	1	0	0	0	0	0	0
vancomycin resistance I	1	0	0	0	0	0	0	0
vancomycin resistance II	1	1	1	0	0	0	0	0
xanthine and xanthosine salvage	0	0	0	0	1	0	0	0

## Sheet: male_treatment_matrix
Name	Kineothrix_sp000403275	Muribaculaceae	Paramuribaculum_sp001689565	UBA11940_sp013316055
&beta;-(1,4)-mannan degradation	0	0	1	0
(3S)-linalool biosynthesis	1	1	1	1
(S)-lactate fermentation to propanoate	0	1	0	0
2-aminoethylphosphonate degradation I	1	0	0	0
2-deoxy-&alpha;-D-ribose 1-phosphate degradation	1	0	0	0
3-(4-hydroxyphenyl)pyruvate biosynthesis	1	1	1	1
3-dehydroquinate biosynthesis I	1	0	0	1
3-hydroxybutyryl-CoA dehydrogenase	1	0	0	0
4-deoxy-L-threo-hex-4-enopyranuronate degradation	0	1	0	0
5-aminoimidazole ribonucleotide biosynthesis I	1	0	0	1
5-aminoimidazole ribonucleotide biosynthesis II	0	0	0	1
5-hydroxybenzimidazole biosynthesis (anaerobic)	0	0	1	0
ATP biosynthesis	1	1	1	0
Agmatine Transport	0	1	0	0
Agmatine extracellular biosynthesis	0	1	1	0
CDP-D-mannitol biosynthesis	0	0	1	0
Coupled NADP reduction via ferredoxin and NADH	1	1	1	1
D-arabinose degradation I	1	1	1	0
D-galactosamine and N-acetyl-D-galactosamine degradation	1	0	0	0
D-galactose degradation I (Leloir pathway)	1	1	1	0
D-galactose detoxification	1	0	0	0
D-gluconate degradation	0	1	0	0
D-xylose degradation II	0	1	1	0
GDP-L-fucose biosynthesis I (from GDP-D-mannose)	1	0	0	0
GDP-mannose biosynthesis	1	0	0	0
L-alanine biosynthesis II	1	1	0	0
L-alanine biosynthesis III	1	1	1	1
L-alanine degradation II (to D-lactate)	1	0	0	0
L-alanine degradation III	1	1	0	0
L-arabinose degradation II	0	1	0	0
L-arginine biosynthesis II (acetyl cycle)	1	0	0	0
L-arginine biosynthesis IV (archaea)	1	1	1	0
L-arginine degradation IV (arginine decarboxylase/agmatine deiminase pathway)	0	1	1	0
L-asparagine biosynthesis I	1	0	0	0
L-asparagine biosynthesis II	1	1	1	0
L-asparagine degradation I	0	1	1	0
L-aspartate biosynthesis	1	1	1	1
L-aspartate degradation I	1	1	1	1
L-citrulline degradation	1	0	0	0
L-cysteine biosynthesis I	1	1	1	0
L-cysteine biosynthesis VII (from S-sulfo-L-cysteine)	1	1	1	0
L-cysteine degradation II	1	1	1	1
L-glutamate biosynthesis I	0	1	0	0
L-glutamate biosynthesis II	1	1	1	1
L-glutamate biosynthesis III	1	1	1	1
L-glutamate biosynthesis IV	1	1	1	1
L-glutamate degradation I	1	1	1	1
L-glutamate degradation IX (via 4-aminobutanoate)	0	1	1	0
L-glutamate degradation X	1	1	1	1
L-glutamine biosynthesis I	1	1	1	1
L-glutamine degradation I	0	1	0	0
L-glutamine degradation II	1	0	0	0
L-histidine biosynthesis	1	1	0	0
L-homoserine biosynthesis	1	1	1	0
L-isoleucine biosynthesis I (from threonine)	1	1	1	0
L-lactaldehyde degradation (anaerobic)	1	0	1	1
L-leucine biosynthesis	1	1	1	0
L-lysine biosynthesis III	1	0	1	0
L-lysine biosynthesis VI	1	1	1	0
L-malate degradation I	1	1	1	1
L-malate degradation II	1	1	1	1
L-methionine biosynthesis I	1	1	1	0
L-methionine degradation II	1	1	1	1
L-ornithine biosynthesis I	1	1	1	0
L-ornithine biosynthesis II	1	0	0	0
L-proline biosynthesis I (from L-glutamate)	1	0	0	0
L-proline biosynthesis III (from L-ornithine)	1	0	0	0
L-serine degradation	1	1	1	0
L-threonine degradation IV	1	0	0	0
L-tryptophan degradation II (via pyruvate)	0	1	0	0
L-tyrosine biosynthesis I	1	1	0	0
L-valine biosynthesis	1	0	0	0
N-acetyl-D-galactosamine degradation	1	0	0	0
N-acetylglucosamine degradation I	1	1	1	0
N-acetylglutaminylglutamine amide biosynthesis	1	0	0	0
N-acetylneuraminate and N-acetylmannosamine degradation II	0	1	1	0
N6-L-threonylcarbamoyladenosine37-modified tRNA biosynthesis	1	0	0	0
NADH repair (prokaryotes)	1	1	1	0
NADH to cytochrome bd oxidase electron transfer I	0	1	0	0
NADH to cytochrome bo oxidase electron transfer I	0	1	0	0
NADP biosynthesis	1	1	1	0
NADPH repair (prokaryotes)	1	1	1	0
Na(+)-translocating ATPase	1	1	1	0
Na(+)-translocating ferredoxin:NAD(+) oxidoreductase complex	1	0	0	0
PRPP biosynthesis	0	1	1	1
Phosphate ABC transporter	1	1	1	1
Pyruvate-ferredoxin oxidorectase to acetyl-CoA	0	1	1	1
S-adenosyl-L-methionine biosynthesis	1	1	1	1
S-adenosyl-L-methionine salvage II	1	0	0	0
TCA cycle II (plants and fungi)	0	1	0	0
Threonine biosynthis from aspartate via homoserine (gapseq)	1	0	1	0
UDP-&alpha;-D-galactose biosynthesis	1	1	1	1
UDP-&alpha;-D-galacturonate biosynthesis I (from UDP-D-glucuronate)	1	0	0	0
UDP-&alpha;-D-glucuronate biosynthesis (from UDP-glucose)	1	1	1	0
UDP-&beta;-L-arabinose biosynthesis I (from UDP-&alpha;-D-xylose)	1	0	0	1
UDP-N-acetyl-&alpha;-D-galactosaminuronate biosynthesis	1	0	0	0
UDP-N-acetyl-&alpha;-D-quinovosamine biosynthesis	1	0	0	0
UDP-N-acetyl-&beta;-L-fucosamine biosynthesis	0	1	1	0
UDP-N-acetyl-D-galactosamine biosynthesis I	1	1	1	1
UDP-N-acetyl-D-galactosamine biosynthesis II	1	0	0	0
UDP-N-acetylmuramoyl-pentapeptide biosynthesis I (meso-diaminopimelate containing)	1	0	0	0
UDP-N-acetylmuramoyl-pentapeptide biosynthesis II (lysine-containing)	1	0	0	0
UMP biosynthesis II	1	1	0	1
UMP biosynthesis III	1	1	1	1
acetate and ATP formation from acetyl-CoA I	1	1	1	1
acetate formation from acetyl-CoA (succinate)	0	1	1	0
acetoin degradation	0	1	1	0
acetyl-CoA fermentation to butanoate clostridia	0	1	0	0
adenine and adenosine salvage I	1	0	0	0
adenosine deoxyribonucleotides de novo biosynthesis II	0	1	0	0
adenosine ribonucleotides de novo biosynthesis	0	1	0	0
alanine racemization	1	1	1	0
arginine dependent acid resistance	1	1	1	0
bergamotene biosynthesis I	1	1	1	1
biotin biosynthesis from 8-amino-7-oxononanoate I	0	1	1	0
biotin biosynthesis from 8-amino-7-oxononanoate II	0	1	1	0
choline degradation III	1	0	0	0
coenzyme A biosynthesis I (prokaryotic)	1	0	0	0
coenzyme A biosynthesis II (eukaryotic)	1	0	0	0
cyanide degradation	1	1	1	0
cyclohexane-1-carboxylate degradation (anaerobic)	1	0	0	0
dTMP de novo biosynthesis (mitochondrial)	1	0	1	0
di-trans,poly-cis-undecaprenyl phosphate biosynthesis	1	1	0	0
ethene biosynthesis III (microbes)	0	1	0	0
fatty acid biosynthesis initiation (type I)	1	1	0	0
fatty acid biosynthesis initiation (type II)	0	1	1	0
formaldehyde assimilation III (dihydroxyacetone cycle)	0	1	1	0
formate assimilation into 5,10-methylenetetrahydrofolate	1	0	0	1
fructose degradation	1	0	0	1
fructosyllysine and glucosyllysine metabolism	1	0	0	0
fucose degradation	1	1	1	0
geranyl diphosphate biosynthesis	1	1	1	1
geranylgeranyl diphosphate biosynthesis	1	0	0	0
ginsenoside degradation III	1	0	0	1
gluconeogenesis I	0	1	1	0
glutaryl-CoA degradation	1	0	0	0
glycine biosynthesis I	1	1	1	0
glycine biosynthesis II	0	1	1	0
glycine biosynthesis III	1	1	1	1
glycine biosynthesis IV	1	1	1	0
glycine cleavage	0	1	1	0
glycogen biosynthesis I (from ADP-D-Glucose)	1	0	0	1
glycogen degradation II	1	1	0	0
glycolysis I (from glucose 6-phosphate)	1	0	0	0
glycolysis II (from fructose 6-phosphate)	1	0	0	0
glycolysis III (from glucose)	1	1	1	0
guanine and guanosine salvage	1	0	0	0
guanine and guanosine salvage II	1	0	0	0
guanosine deoxyribonucleotides de novo biosynthesis II	0	1	0	0
hydrogen production III	0	1	1	0
hydrogen production VIII	0	1	1	0
hydroxymethylpyrimidine salvage	0	1	0	0
lactose degradation III	0	1	1	0
laminaribiose degradation	1	0	0	0
lipid IVA biosynthesis (E. coli)	0	1	1	0
lipid IVA biosynthesis (P. putida)	0	1	1	0
long-chain fatty acid activation	1	1	1	0
magnoflorine biosynthesis	1	1	1	1
malate/L-aspartate shuttle pathway	0	1	1	0
melibiose degradation	1	1	1	0
menaquinol-4 biosynthesis I	0	1	1	0
menaquinol-6 biosynthesis	0	1	1	0
menaquinol-8 biosynthesis	0	1	1	0
menaquinol-9 biosynthesis	0	1	1	0
methanol oxidation to formaldehyde IV	0	0	1	0
methylerythritol phosphate pathway I	1	0	1	0
methylerythritol phosphate pathway II	1	0	1	0
methylglyoxal degradation III	1	1	1	0
oxalate degradation II	0	1	1	0
oxalate degradation IV	1	1	1	0
palmitate biosynthesis (type I fatty acid synthase)	1	1	1	1
pentose phosphate pathway (non-oxidative branch) II	0	1	1	1
pentose phosphate pathway (partial)	0	1	1	0
peptidoglycan biosynthesis I (meso-diaminopimelate containing)	1	0	0	0
phosphate acquisition	0	1	1	0
protein N-glycosylation processing phase (plants and animals)	0	1	1	0
protein SAMPylation and SAMP-mediated thiolation	0	1	0	0
purine ribonucleosides degradation	1	0	0	0
putrescine biosynthesis II	0	1	1	0
pyridoxal 5'-phosphate biosynthesis I	0	1	1	0
pyridoxal 5'-phosphate biosynthesis II	1	0	0	0
pyrimidine nucleobases salvage I	1	1	1	0
pyrimidine ribonucleosides salvage I	0	1	0	0
pyruvate decarboxylation to acetyl CoA II	0	1	1	1
pyruvate fermentation to acetate II	1	1	1	1
pyruvate fermentation to butanoate	1	0	0	0
pyruvate fermentation to propanoate I	0	1	1	0
queuosine biosynthesis II (queuine salvage)	1	1	1	1
queuosine biosynthesis III (queuosine salvage)	1	1	1	1
sedoheptulose bisphosphate bypass	1	1	1	1
seleno-amino acid biosynthesis (plants)	1	1	1	0
seleno-amino acid detoxification and volatilization I	1	0	0	1
spermidine biosynthesis II	0	1	1	0
spermidine biosynthesis II (only one key enzyme)	0	1	1	0
stachyose degradation	1	0	0	0
starch degradation III	0	0	0	1
starch degradation V	1	0	0	1
stearate biosynthesis III (fungi)	1	1	1	0
succinate to cytochrome bd oxidase electron transfer	0	1	0	0
succinate to cytochrome bo oxidase electron transfer	0	1	0	0
succinoglycan biosynthesis	1	0	0	0
sucrose degradation I (sucrose phosphotransferase)	1	0	0	0
sucrose degradation III (sucrose invertase)	1	1	1	0
sulfoacetaldehyde degradation I	1	1	1	0
tRNA charging	1	1	1	1
tetrahydrofolate salvage from 5,10-methenyltetrahydrofolate	1	0	0	1
trans, trans-farnesyl diphosphate biosynthesis	1	0	0	0
trehalose biosynthesis IV	1	0	0	0
trehalose biosynthesis VII	1	0	0	0
trehalose degradation I (low osmolarity)	1	0	0	0
trehalose degradation IV	1	0	0	0
trehalose degradation V	1	0	0	0

## Sheet: female_control_matrix
Name	COE1_sp002358575	COE1_sp009774375	Clostridia	UBA7173_sp002491305
&beta;-(1,4)-mannan degradation	1	0	0	0
&beta;-1,4-D-mannosyl-N-acetyl-D-glucosamine degradation	1	1	1	0
&beta;-D-glucuronide and D-glucuronate degradation	1	1	0	0
(1,4)-&beta;-D-xylan degradation	1	0	1	0
(3S)-linalool biosynthesis	1	1	1	1
(5Z)-dodecenoate biosynthesis II	1	1	1	0
(S)-lactate fermentation to propanoate	0	0	0	1
3-(4-hydroxyphenyl)pyruvate biosynthesis	1	1	1	1
3-dehydroquinate biosynthesis I	0	1	0	0
3-hydroxybutyryl-CoA dehydrogenase	1	1	1	0
4-deoxy-L-threo-hex-4-enopyranuronate degradation	1	1	0	0
5-aminoimidazole ribonucleotide biosynthesis I	1	1	1	0
5-aminoimidazole ribonucleotide biosynthesis II	1	1	1	0
ATP biosynthesis	1	1	1	1
Agmatine Transport	0	0	0	1
Agmatine extracellular biosynthesis	0	0	0	1
CDP-4-dehydro-3,6-dideoxy-D-glucose biosynthesis	0	0	1	0
CMP phosphorylation	1	1	1	0
Coupled NADP reduction via ferredoxin and NADH	1	1	1	1
D-fructuronate degradation	1	0	1	0
D-galactarate degradation II	1	0	0	0
D-galactose degradation I (Leloir pathway)	1	1	1	0
D-galactose detoxification	0	0	1	0
D-galacturonate degradation I	1	1	0	0
D-gluconate degradation	1	1	1	0
Entner-Doudoroff pathway III (semi-phosphorylative)	1	0	0	0
Entner-Doudoroff shunt	1	1	1	0
Folate biosynthesis from GTP and 4-aminobenzoate via dihydropterin-3-triphosphate	0	0	1	0
GDP-6-deoxy-D-talose biosynthesis	1	1	1	1
GDP-D-perosamine biosynthesis	1	1	1	0
GDP-D-rhamnose biosynthesis	1	1	1	1
GDP-L-fucose biosynthesis I (from GDP-D-mannose)	1	1	1	1
GDP-mannose biosynthesis	0	0	1	0
L-alanine biosynthesis III	1	1	1	1
L-alanine degradation IV	0	0	0	1
L-arginine biosynthesis II (acetyl cycle)	1	1	1	0
L-arginine biosynthesis IV (archaea)	1	1	1	0
L-arginine degradation III (arginine decarboxylase/agmatinase pathway)	0	1	0	0
L-asparagine biosynthesis I	1	1	1	0
L-asparagine biosynthesis II	1	1	1	0
L-asparagine biosynthesis III (tRNA-dependent)	1	1	1	0
L-asparagine degradation I	0	0	1	1
L-aspartate biosynthesis	1	1	1	1
L-aspartate degradation I	1	1	1	1
L-citrulline degradation	1	1	1	0
L-cysteine biosynthesis I	1	1	1	0
L-cysteine biosynthesis VII (from S-sulfo-L-cysteine)	1	0	1	0
L-cysteine degradation II	1	1	1	1
L-galactose degradation	1	0	0	0
L-glutamate biosynthesis II	1	1	1	1
L-glutamate biosynthesis III	1	1	1	1
L-glutamate biosynthesis IV	1	1	1	1
L-glutamate biosynthesis V	1	1	1	0
L-glutamate degradation I	1	1	1	1
L-glutamate degradation X	1	1	1	1
L-glutamine biosynthesis I	1	1	1	1
L-glutamine biosynthesis III	1	0	0	0
L-glutamine degradation II	1	1	1	0
L-gulonate degradation	0	1	0	0
L-histidine biosynthesis	0	0	1	0
L-histidine degradation III	0	0	0	1
L-histidine degradation VI	0	0	0	1
L-homoserine biosynthesis	1	1	1	0
L-isoleucine biosynthesis I (from threonine)	1	1	1	0
L-isoleucine biosynthesis II	1	1	0	0
L-lactaldehyde degradation (anaerobic)	1	1	0	0
L-leucine biosynthesis	1	1	1	0
L-lysine biosynthesis III	1	1	0	0
L-lysine biosynthesis VI	1	1	1	1
L-malate degradation I	1	1	1	1
L-malate degradation II	1	1	1	1
L-methionine biosynthesis I	1	0	0	0
L-methionine degradation II	1	1	1	0
L-ornithine biosynthesis I	1	1	1	0
L-ornithine biosynthesis II	1	1	1	0
L-phenylalanine biosynthesis I	0	0	1	0
L-proline biosynthesis I (from L-glutamate)	1	1	1	0
L-proline biosynthesis III (from L-ornithine)	1	1	1	0
L-rhamnose degradation I	0	1	0	0
L-serine degradation	1	1	1	1
L-threonine degradation I	1	1	1	0
L-tryptophan biosynthesis	0	1	0	0
L-tryptophan biosynthesis (complex)	0	1	0	0
L-tryptophan degradation II (via pyruvate)	0	0	0	1
L-tyrosine biosynthesis I	1	1	1	0
L-valine biosynthesis	1	1	1	0
N-acetylglucosamine degradation I	1	1	1	0
N-acetylglutaminylglutamine amide biosynthesis	1	1	1	0
N-end rule pathway I (prokaryotic)	1	1	0	0
N6-L-threonylcarbamoyladenosine37-modified tRNA biosynthesis	1	1	1	0
NADH repair (prokaryotes)	0	1	1	1
NADH to cytochrome bd oxidase electron transfer I	0	0	0	1
NADH to cytochrome bo oxidase electron transfer I	0	0	0	1
NADP biosynthesis	1	1	1	0
NADPH repair (prokaryotes)	0	1	1	1
Na(+)-translocating ATPase	1	1	1	1
Na(+)-translocating ferredoxin:NAD(+) oxidoreductase complex	1	1	1	0
PRPP biosynthesis	0	0	0	1
Phosphate ABC transporter	1	1	1	1
Pyruvate-ferredoxin oxidorectase to acetyl-CoA	0	0	0	1
S-adenosyl-L-methionine biosynthesis	1	1	1	1
S-adenosyl-L-methionine salvage II	0	0	1	0
S-methyl-5'-thioadenosine degradation IV	0	1	0	0
TCA cycle I (prokaryotic)	0	0	0	1
TCA cycle IV (2-oxoglutarate decarboxylase)	1	0	0	0
TCA cycle VII (acetate-producers)	0	0	0	1
Threonine biosynthis from aspartate via homoserine (gapseq)	1	1	1	0
UDP-&alpha;-D-galactose biosynthesis	1	1	1	1
UDP-&alpha;-D-galacturonate biosynthesis I (from UDP-D-glucuronate)	1	1	1	0
UDP-&alpha;-D-glucose biosynthesis	1	0	1	0
UDP-&alpha;-D-glucuronate biosynthesis (from UDP-glucose)	1	1	1	1
UDP-&beta;-L-arabinose biosynthesis I (from UDP-&alpha;-D-xylose)	1	1	1	0
UDP-N-acetyl-&alpha;-D-galactosaminuronate biosynthesis	1	1	1	0
UDP-N-acetyl-&alpha;-D-mannosaminouronate biosynthesis	0	1	1	1
UDP-N-acetyl-&alpha;-D-quinovosamine biosynthesis	1	1	1	0
UDP-N-acetyl-D-galactosamine biosynthesis I	1	1	1	1
UDP-N-acetyl-D-galactosamine biosynthesis II	1	0	0	0
UDP-N-acetylmuramoyl-pentapeptide biosynthesis I (meso-diaminopimelate containing)	1	1	1	0
UDP-N-acetylmuramoyl-pentapeptide biosynthesis II (lysine-containing)	1	1	1	0
UMP biosynthesis II	1	1	1	1
UMP biosynthesis III	1	1	1	1
UTP and CTP de novo biosynthesis	1	1	1	0
acetate and ATP formation from acetyl-CoA I	1	1	1	1
acetate conversion to acetyl-CoA	0	0	0	1
acetate formation from acetyl-CoA (succinate)	1	1	0	1
acetoin degradation	0	0	0	1
acetyl-CoA fermentation to butanoate clostridia	1	1	0	1
adenine and adenosine salvage I	1	1	0	0
adenosine deoxyribonucleotides de novo biosynthesis II	0	0	0	1
adenosine ribonucleotides de novo biosynthesis	1	1	1	0
alanine racemization	1	1	1	1
ammonia assimilation cycle II	1	1	1	0
arginine dependent acid resistance	1	1	0	1
bergamotene biosynthesis I	1	1	1	1
biotin biosynthesis from 8-amino-7-oxononanoate I	1	0	0	1
biotin biosynthesis from 8-amino-7-oxononanoate II	0	0	0	1
citrate degradation	0	0	0	1
coenzyme A biosynthesis I (prokaryotic)	0	0	1	0
coenzyme A biosynthesis II (eukaryotic)	0	0	1	0
cyanide degradation	1	1	1	0
cyclohexane-1-carboxylate degradation (anaerobic)	1	1	1	0
dTMP de novo biosynthesis (mitochondrial)	0	0	1	0
di-trans,poly-cis-undecaprenyl phosphate biosynthesis	1	1	1	1
ethanol degradation IV	0	0	0	1
ethylene glycol degradation	1	0	0	0
fatty acid &beta;-oxidation II (plant peroxisome)	0	1	0	0
fatty acid &beta;-oxidation VI (mammalian peroxisome)	0	1	0	0
fatty acid biosynthesis initiation (mitochondria)	0	1	0	0
fatty acid biosynthesis initiation (type I)	1	1	1	1
fatty acid biosynthesis initiation (type II)	1	1	1	1
fatty acid elongation -- saturated	1	0	0	0
folate polyglutamylation	0	0	1	0
formaldehyde assimilation III (dihydroxyacetone cycle)	0	0	0	1
formaldehyde oxidation IV (thiol-independent)	1	0	0	0
formate assimilation into 5,10-methylenetetrahydrofolate	1	1	1	0
fructose degradation	1	1	0	0
geranyl diphosphate biosynthesis	1	1	1	1
geranylgeranyl diphosphate biosynthesis	1	1	1	0
ginsenoside degradation III	0	1	1	1
gluconeogenesis I	0	0	0	1
glutaryl-CoA degradation	1	1	1	0
glycine betaine biosynthesis II (Gram-positive bacteria)	1	0	0	0
glycine biosynthesis I	1	1	1	1
glycine biosynthesis II	0	0	0	1
glycine biosynthesis III	1	1	1	1
glycine biosynthesis IV	1	1	1	1
glycine cleavage	0	0	0	1
glycogen biosynthesis I (from ADP-D-Glucose)	1	1	1	0
glycogen degradation I	1	1	1	0
glycogen degradation II	1	0	0	0
glycolysis I (from glucose 6-phosphate)	1	1	1	0
glycolysis II (from fructose 6-phosphate)	1	1	1	0
glycolysis III (from glucose)	1	0	0	1
glycolysis IV	1	0	0	0
guanine and guanosine salvage	1	0	0	0
guanosine deoxyribonucleotides de novo biosynthesis II	0	0	0	1
hydrogen production III	0	0	0	1
hydrogen production VIII	0	0	0	1
hydroxymethylpyrimidine salvage	0	0	0	1
lactose degradation III	1	1	1	0
laminaribiose degradation	1	0	1	0
leucyl aminopeptidase test	1	0	0	0
lipid IVA biosynthesis (E. coli)	0	0	0	1
lipid IVA biosynthesis (P. putida)	0	0	0	1
long-chain fatty acid activation	1	1	1	1
magnoflorine biosynthesis	1	1	1	1
malate/L-aspartate shuttle pathway	0	0	0	1
mannitol degradation I	1	1	0	0
melibiose degradation	1	1	1	1
menaquinol-4 biosynthesis I	0	0	0	1
menaquinol-6 biosynthesis	0	0	0	1
menaquinol-8 biosynthesis	0	0	0	1
menaquinol-9 biosynthesis	0	0	0	1
methylerythritol phosphate pathway I	1	1	1	0
methylerythritol phosphate pathway II	1	1	1	0
methylglyoxal degradation III	0	1	0	1
oxalate degradation II	0	0	0	1
oxalate degradation IV	1	1	1	1
palmitate biosynthesis (type I fatty acid synthase)	1	1	1	1
pentose phosphate pathway (non-oxidative branch) II	0	0	0	1
peptidoglycan biosynthesis I (meso-diaminopimelate containing)	1	1	1	0
phosphate acquisition	0	0	0	1
phosphatidylcholine biosynthesis II	0	0	1	0
phosphatidylinositol biosynthesis II (eukaryotes)	0	0	0	1
ppGpp metabolism	1	1	1	0
purine ribonucleosides degradation	1	1	1	0
putrescine biosynthesis I	0	1	0	0
pyridoxal 5'-phosphate biosynthesis I	0	0	0	1
pyrimidine nucleobases salvage I	1	1	1	1
pyrimidine ribonucleosides salvage I	0	0	0	1
pyruvate decarboxylation to acetyl CoA II	0	0	0	1
pyruvate fermentation to (S)-lactate	1	1	0	1
pyruvate fermentation to acetate II	1	1	1	1
pyruvate fermentation to butanoate	1	1	1	0
pyruvate fermentation to propanoate I	0	0	0	1
queuosine biosynthesis II (queuine salvage)	1	1	1	1
queuosine biosynthesis III (queuosine salvage)	1	1	1	1
sedoheptulose bisphosphate bypass	1	1	1	1
seleno-amino acid biosynthesis (plants)	1	1	1	0
seleno-amino acid detoxification and volatilization I	0	1	0	0
serine racemization	1	1	0	0
siroheme biosynthesis	1	1	0	0
spermidine biosynthesis I	0	1	0	0
spermidine biosynthesis II	0	1	0	1
spermidine biosynthesis II (only one key enzyme)	0	1	0	1
spermine biosynthesis	0	1	0	0
stachyose degradation	1	0	1	0
starch degradation V	1	1	1	0
stearate biosynthesis III (fungi)	1	1	1	1
succinate to cytochrome bd oxidase electron transfer	0	0	0	1
succinate to cytochrome bo oxidase electron transfer	0	0	0	1
succinoglycan biosynthesis	1	1	1	0
sucrose degradation I (sucrose phosphotransferase)	0	1	1	0
sucrose degradation III (sucrose invertase)	1	0	1	1
sucrose degradation IV (sucrose phosphorylase)	0	1	0	0
sulfate activation for sulfonation	0	1	0	0
sulfoacetaldehyde degradation I	1	1	1	0
sulfoacetaldehyde degradation II	1	0	0	0
superoxide radicals degradation	0	0	0	1
tRNA charging	1	1	1	1
tetrahydrofolate biosynthesis	0	0	1	0
tetrahydrofolate salvage from 5,10-methenyltetrahydrofolate	1	1	1	0
trans, trans-farnesyl diphosphate biosynthesis	1	1	1	0
trehalose biosynthesis IV	1	1	1	0
trehalose biosynthesis VII	1	1	1	0
trehalose degradation I (low osmolarity)	1	0	0	0
triclosan resistance	1	1	1	0
vancomycin resistance II	1	1	0	0
xylitol degradation	0	1	0	0

## Sheet: female_treatment_matrix
Name	Alistipes_sp009774895	Lawsonibacter	UBA7173_sp001689485
&beta;-D-glucuronide and D-glucuronate degradation	0	1	0
(3S)-linalool biosynthesis	1	1	1
(5Z)-dodecenoate biosynthesis I	1	0	0
(5Z)-dodecenoate biosynthesis II	1	0	0
(S)-lactate fermentation to propanoate	0	0	1
3-(4-hydroxyphenyl)pyruvate biosynthesis	0	1	1
3-dehydroquinate biosynthesis I	0	1	0
3-hydroxybutyryl-CoA dehydrogenase	0	1	0
4-deoxy-L-threo-hex-4-enopyranuronate degradation	0	1	0
5-aminoimidazole ribonucleotide biosynthesis I	1	1	0
5-aminoimidazole ribonucleotide biosynthesis II	1	1	0
ATP biosynthesis	0	1	1
Agmatine extracellular biosynthesis	0	0	1
CMP-3-deoxy-D-manno-octulosonate biosynthesis	1	0	0
Coupled NADP reduction via ferredoxin and NADH	1	1	1
D-galactose degradation I (Leloir pathway)	1	0	1
D-galacturonate degradation I	0	1	0
D-gluconate degradation	0	1	0
GDP-6-deoxy-D-talose biosynthesis	0	0	1
GDP-D-perosamine biosynthesis	0	0	1
GDP-D-rhamnose biosynthesis	0	0	1
GDP-L-fucose biosynthesis I (from GDP-D-mannose)	0	0	1
L-alanine biosynthesis III	1	1	1
L-alanine degradation IV	0	0	1
L-arginine biosynthesis II (acetyl cycle)	0	1	0
L-arginine biosynthesis IV (archaea)	0	1	0
L-arginine degradation IV (arginine decarboxylase/agmatine deiminase pathway)	0	0	1
L-asparagine biosynthesis I	0	1	0
L-asparagine biosynthesis II	0	1	0
L-asparagine degradation I	1	1	1
L-aspartate biosynthesis	0	1	1
L-aspartate degradation I	0	1	1
L-cysteine biosynthesis I	0	1	0
L-cysteine biosynthesis VII (from S-sulfo-L-cysteine)	0	1	0
L-cysteine degradation II	1	1	1
L-glutamate biosynthesis II	1	1	1
L-glutamate biosynthesis III	1	1	1
L-glutamate biosynthesis IV	1	1	1
L-glutamate degradation I	1	1	1
L-glutamate degradation IX (via 4-aminobutanoate)	0	0	1
L-glutamate degradation V (via hydroxyglutarate)	0	1	0
L-glutamate degradation X	1	1	1
L-glutamine biosynthesis I	0	1	1
L-histidine biosynthesis	0	1	0
L-histidine degradation III	1	1	1
L-histidine degradation VI	0	1	1
L-homoserine biosynthesis	0	1	0
L-isoleucine biosynthesis I (from threonine)	0	1	0
L-lactaldehyde degradation (anaerobic)	0	0	1
L-lysine biosynthesis VI	0	1	1
L-malate degradation I	1	1	1
L-malate degradation II	1	1	1
L-methionine degradation II	0	1	0
L-ornithine biosynthesis I	0	1	0
L-ornithine biosynthesis II	0	1	0
L-phenylalanine degradation VI (reductive Stickland reaction)	0	1	0
L-rhamnose degradation I	0	0	1
L-serine degradation	1	1	1
L-threonine degradation II	0	0	1
L-tryptophan degradation II (via pyruvate)	1	0	1
L-tyrosine degradation V (reductive Stickland reaction)	0	1	0
L-valine biosynthesis	0	1	0
N-acetylglucosamine degradation I	0	1	0
N6-L-threonylcarbamoyladenosine37-modified tRNA biosynthesis	0	1	0
NADH repair (prokaryotes)	0	1	1
NADH to cytochrome bd oxidase electron transfer I	0	0	1
NADH to cytochrome bo oxidase electron transfer I	0	0	1
NADP biosynthesis	1	1	1
NADPH repair (prokaryotes)	0	1	1
Na(+)-translocating ATPase	1	1	1
Na(+)-translocating ferredoxin:NAD(+) oxidoreductase complex	1	1	0
PRPP biosynthesis	1	1	1
Phosphate ABC transporter	1	1	1
Pyruvate-ferredoxin oxidorectase to acetyl-CoA	1	1	1
S-adenosyl-L-methionine biosynthesis	1	1	1
S-adenosyl-L-methionine salvage II	1	1	0
Threonine biosynthis from aspartate via homoserine (gapseq)	0	1	0
UDP-&alpha;-D-galactose biosynthesis	1	1	1
UDP-&alpha;-D-galacturonate biosynthesis I (from UDP-D-glucuronate)	0	0	1
UDP-&alpha;-D-glucuronate biosynthesis (from UDP-glucose)	1	0	1
UDP-&beta;-L-arabinose biosynthesis I (from UDP-&alpha;-D-xylose)	1	1	1
UDP-2,3-diacetamido-2,3-dideoxy-&alpha;-D-mannuronate biosynthesis	0	0	1
UDP-N-acetyl-&alpha;-D-mannosaminouronate biosynthesis	0	0	1
UDP-N-acetyl-D-galactosamine biosynthesis I	1	1	1
UDP-N-acetylmuramoyl-pentapeptide biosynthesis I (meso-diaminopimelate containing)	1	0	0
UDP-N-acetylmuramoyl-pentapeptide biosynthesis II (lysine-containing)	1	0	0
UMP biosynthesis I	1	0	0
UMP biosynthesis II	1	1	1
UMP biosynthesis III	1	1	1
acetate and ATP formation from acetyl-CoA I	0	1	1
acetate formation from acetyl-CoA (succinate)	1	1	1
acetoin degradation	1	0	1
acetyl-CoA fermentation to butanoate clostridia	1	1	1
adenosine deoxyribonucleotides de novo biosynthesis II	0	0	1
adenosine ribonucleotides de novo biosynthesis	1	0	1
alanine racemization	1	1	1
arginine dependent acid resistance	0	0	1
bergamotene biosynthesis I	1	1	1
biotin biosynthesis from 8-amino-7-oxononanoate I	0	0	1
biotin biosynthesis from 8-amino-7-oxononanoate II	0	0	1
cyanide degradation	0	1	0
cyclohexane-1-carboxylate degradation (anaerobic)	0	1	0
dTMP de novo biosynthesis (mitochondrial)	1	0	0
di-trans,poly-cis-undecaprenyl phosphate biosynthesis	1	0	1
fatty acid &beta;-oxidation II (plant peroxisome)	0	1	0
fatty acid &beta;-oxidation VI (mammalian peroxisome)	0	1	0
fatty acid biosynthesis initiation (type I)	0	0	1
fatty acid biosynthesis initiation (type II)	1	0	1
folate polyglutamylation	0	1	0
folate transformations II (plants)	1	0	0
folate transformations III (E. coli)	1	0	0
formaldehyde assimilation III (dihydroxyacetone cycle)	1	0	1
formate assimilation into 5,10-methylenetetrahydrofolate	0	1	0
fructose degradation	0	1	0
geranyl diphosphate biosynthesis	1	1	1
geranylgeranyl diphosphate biosynthesis	0	1	0
ginsenoside degradation III	0	1	1
gluconeogenesis I	1	0	1
glutaryl-CoA degradation	0	1	0
glutathione degradation (DUG pathway - yeast)	0	1	0
glycine biosynthesis I	1	0	1
glycine biosynthesis II	1	0	1
glycine biosynthesis III	0	1	1
glycine biosynthesis IV	1	1	1
glycine cleavage	1	0	1
glycogen biosynthesis I (from ADP-D-Glucose)	0	1	0
glycogen degradation I	0	1	0
glycogen degradation II	1	0	1
glycolysis I (from glucose 6-phosphate)	1	0	0
glycolysis II (from fructose 6-phosphate)	1	0	0
glycolysis III (from glucose)	1	0	1
guanine and guanosine salvage	0	1	0
guanine and guanosine salvage II	0	1	0
guanosine deoxyribonucleotides de novo biosynthesis II	0	0	1
hydrogen production I	0	1	0
hydrogen production III	0	0	1
hydrogen production VIII	0	0	1
hydroxymethylpyrimidine salvage	0	1	1
lactose degradation III	1	0	1
lipid IVA biosynthesis (E. coli)	1	0	1
lipid IVA biosynthesis (P. putida)	1	0	1
lipoate biosynthesis and incorporation I	1	0	0
long-chain fatty acid activation	0	1	1
magnoflorine biosynthesis	1	1	1
malate/L-aspartate shuttle pathway	0	0	1
melibiose degradation	0	1	1
menaquinol-4 biosynthesis I	1	0	1
menaquinol-6 biosynthesis	1	0	1
menaquinol-8 biosynthesis	1	0	1
menaquinol-9 biosynthesis	1	0	1
methanol oxidation to formaldehyde IV	0	0	1
methylerythritol phosphate pathway I	0	1	1
methylerythritol phosphate pathway II	0	1	1
methylglyoxal degradation III	0	0	1
oxalate degradation II	0	0	1
oxalate degradation IV	1	1	1
palmitate biosynthesis (type I fatty acid synthase)	0	1	1
pentose phosphate pathway (non-oxidative branch) I	1	0	0
pentose phosphate pathway (non-oxidative branch) II	1	0	1
pentose phosphate pathway (partial)	1	0	1
peptidoglycan biosynthesis I (meso-diaminopimelate containing)	1	0	0
phosphate acquisition	1	0	1
phosphatidylinositol biosynthesis II (eukaryotes)	0	0	1
protein N-glycosylation processing phase (plants and animals)	1	0	1
putrescine biosynthesis II	0	0	1
pyridoxal 5'-phosphate biosynthesis I	1	0	1
pyrimidine nucleobases salvage I	1	1	1
pyrimidine ribonucleosides salvage I	1	0	0
pyruvate decarboxylation to acetyl CoA II	1	1	1
pyruvate fermentation to (S)-lactate	0	1	0
pyruvate fermentation to acetate II	0	1	1
pyruvate fermentation to butanoate	0	1	0
pyruvate fermentation to propanoate I	1	0	1
queuosine biosynthesis I (de novo)	0	0	1
queuosine biosynthesis II (queuine salvage)	1	1	1
queuosine biosynthesis III (queuosine salvage)	1	1	1
sedoheptulose bisphosphate bypass	1	1	1
seleno-amino acid biosynthesis (plants)	0	1	0
spermidine biosynthesis II	1	0	1
spermidine biosynthesis II (only one key enzyme)	1	1	1
starch degradation V	0	1	0
stearate biosynthesis III (fungi)	0	1	1
succinate to cytochrome bd oxidase electron transfer	1	0	1
succinate to cytochrome bo oxidase electron transfer	1	0	1
succinoglycan biosynthesis	0	1	0
sucrose degradation III (sucrose invertase)	0	0	1
sucrose degradation V (sucrose &alpha;-glucosidase)	0	1	0
sulfoacetaldehyde degradation I	0	1	0
superoxide radicals degradation	0	0	1
tRNA charging	1	1	1
tetrahydrofolate salvage from 5,10-methenyltetrahydrofolate	0	1	0
trans, trans-farnesyl diphosphate biosynthesis	0	1	0
trehalose degradation IV	1	0	0
trehalose degradation V	1	0	0
urea cycle	0	1	0
urea degradation II	1	0	0
xanthine and xanthosine salvage	0	1	0
xylitol degradation	0	1	0
