# Supplementary material for: Degenerative Cervical Myelopathy induces sex-specific dysbiosis in mice
Source: Front Microbiol. 2023 Oct 20;14:1229783. doi: 10.3389/fmicb.2023.1229783 (PMC10623434; doi:10.3389/fmicb.2023.1229783)
Supplement: Supplementary file 9 [file Table_9.XLSX]

## Sheet: Sheet1
Male Reactions
### pyruvate dehydrogenase (NADP+): sham
PYRUVATE-DEHYDROGENASE-NADP+-RXN	1.2.1.51	Dubosiella_sp004793885		UniRef50_A0A1Z4V4B0	44.763	0	983	99	NODE_249_length_45788_cov_14_614830	10983	7498	|PWY-6970|	good_blast	full	rxn00155 rxn33851	NA	0	1
PYRUVATE-DEHYDROGENASE-NADP+-RXN	1.2.1.51	RACS_045_sp013316135		UniRef50_A0A1Z4V4B0	49.168	0	1183	99	NODE_1995_length_9058_cov_4_075419	5311	1793	|PWY-6970|	good_blast	full	rxn00155 rxn33851	NA	0	1
PYRUVATE-DEHYDROGENASE-NADP+-RXN	1.2.1.51	UBA7173_sp001915385		UniRef50_A0A1Z4V4B0	48.017	0	1077	99	NODE_1073_length_13633_cov_116_018559	9875	6363	|PWY-6970|	good_blast	full	rxn00155 rxn33851	NA	0	1
PYRUVATE-DEHYDROGENASE-NADP+-RXN	1.2.1.51	UBA7173_sp001915385		UniRef50_A0A1Z4V4B0	44.296	0	1008	99	NODE_363_length_35679_cov_106_124775	23673	27158	|PWY-6970|	good_blast	full	rxn00155 rxn33851	NA	0	1
### pyruvate fermentation to (S)-lactate: sham
L-LACTATE-DEHYDROGENASE-RXN	1.1.1.27	COE1_sp002358575	NODE_12_length_162894_cov_27_263954	.	CDS	72705	73664	.	+	.	ID=male_bins_95_identity___22186;Name=COG0039;db_xref=COG20:COG0039;product=Malate/lactate dehydrogenase (Mdh) (PDB:4WLO)
L-LACTATE-DEHYDROGENASE-RXN	1.1.1.27	Dubosiella_sp004793885	NODE_513_length_31085_cov_9_943248	.	CDS	3664	4614	.	+	.	ID=male_bins_95_identity___4941;Name=COG0039;db_xref=COG20:COG0039;product=Malate/lactate dehydrogenase (Mdh) (PDB:4WLO)
L-LACTATE-DEHYDROGENASE-RXN	1.1.1.27	UMGS1994_sp900553945	NODE_25713_length_2111_cov_3_410506	.	CDS	1285	2109	.	-	.	ID=male_bins_95_identity___13375;Name=COG0039;db_xref=COG20:COG0039;product=Malate/lactate dehydrogenase (Mdh) (PDB:4WLO)
### pyruvate fermentation to butanoate: sham
ACETYL-COA-ACETYLTRANSFER-RXN	2.3.1.16/2.3.1.9	Acetatifactor_sp011959105	NODE_167_length_73020_cov_15_007798	.	CDS	12711	13895	.	+	.	ID=male_bins_95_identity___6206;Name=COG0183;db_xref=COG20:COG0183;product=Acetyl-CoA acetyltransferase (PaaJ) (PDB:1AFW)
PHOSPHATE-BUTYRYLTRANSFERASE-RXN	2.3.1.19	Acetatifactor_sp011959105	NODE_2152_length_10921_cov_12_821185	.	CDS	1310	2224	.	-	.	ID=male_bins_95_identity___21728;Name=COG0280;db_xref=COG20:COG0280;product=Phosphotransacetylase (includes Pta, EutD and phosphobutyryltransferase) (Pta) (PDB:1QZT) (PUBMED:28754323)
BUTYRATE-KINASE-RXN	2.7.2.14/2.7.2.7	Acetatifactor_sp011959105	NODE_2152_length_10921_cov_12_821185	.	CDS	55	1122	.	-	.	ID=male_bins_95_identity___21727;Name=COG3426;db_xref=COG20:COG3426;product=Butyrate kinase (Buk) (PDB:1SAZ)
ACETYL-COA-ACETYLTRANSFER-RXN	2.3.1.16/2.3.1.9	COE1_sp002358575	NODE_22_length_91632_cov_44_239219	.	CDS	1669	2853	.	+	.	ID=male_bins_95_identity___13736;Name=COG0183;db_xref=COG20:COG0183;product=Acetyl-CoA acetyltransferase (PaaJ) (PDB:1AFW)
PHOSPHATE-BUTYRYLTRANSFERASE-RXN	2.3.1.19	COE1_sp002358575	NODE_59_length_21357_cov_30_720026	.	CDS	16766	17686	.	-	.	ID=male_bins_95_identity___17158;Name=COG0280;db_xref=COG20:COG0280;product=Phosphotransacetylase (includes Pta, EutD and phosphobutyryltransferase) (Pta) (PDB:1QZT) (PUBMED:28754323)
BUTYRATE-KINASE-RXN	2.7.2.14/2.7.2.7	COE1_sp002358575	NODE_59_length_21357_cov_30_720026	.	CDS	15676	16743	.	-	.	ID=male_bins_95_identity___17157;Name=COG3426;db_xref=COG20:COG3426;product=Butyrate kinase (Buk) (PDB:1SAZ)
ACETYL-COA-ACETYLTRANSFER-RXN	2.3.1.16/2.3.1.9	UBA3282	NODE_441_length_36455_cov_7_205495	.	CDS	21662	22861	.	-	.	ID=male_bins_95_identity___18936;Name=COG0183;db_xref=COG20:COG0183;product=Acetyl-CoA acetyltransferase (PaaJ) (PDB:1AFW)
PHOSPHATE-BUTYRYLTRANSFERASE-RXN	2.3.1.19	UBA3282	NODE_495_length_32996_cov_7_734950	.	CDS	22457	23377	.	+	.	ID=male_bins_95_identity___2145;Name=COG0280;db_xref=COG20:COG0280;product=Phosphotransacetylase (includes Pta, EutD and phosphobutyryltransferase) (Pta) (PDB:1QZT) (PUBMED:28754323)
BUTYRATE-KINASE-RXN	2.7.2.14/2.7.2.7	UBA3282	NODE_495_length_32996_cov_7_734950	.	CDS	23451	24518	.	+	.	ID=male_bins_95_identity___2146;Name=COG3426;db_xref=COG20:COG3426;product=Butyrate kinase (Buk) (PDB:1SAZ)
### pyruvate fermentation to propanoate I: sham fumarase, fumarate reductase, propionyl-CoA:succinate CoA transferase, methylmalonyl-CoA carboxyltransferase and malate dehydrogenase.
FUMHYDR-RXN	4.2.1.2	UBA7173_sp001915385	NODE_622_length_21957_cov_90_375947	.	CDS	199	1848	.	-	.	ID=male_bins_95_identity___34768;Name=COG1838;db_xref=COG20:COG1838;product=Tartrate dehydratase beta subunit/Fumarate hydratase class I, C-terminal domain (FumA) (PDB:5L2R)
R601-RXN	1.3.5.4	UBA7173_sp001915385	NODE_116_length_67905_cov_92_200929	.	CDS	54296	56323	.	+	.	ID=male_bins_95_identity___4250;Name=COG1053;db_xref=COG20:COG1053;product=Succinate dehydrogenase/fumarate reductase, flavoprotein subunit (SdhA) (PDB:1KF6)
RXN0-268	propionyl-CoA:succinate CoA transferase	UBA7173_sp001915385	NODE_992_length_14386_cov_96_704557	.	CDS	93	1586	.	-	.	ID=male_bins_95_identity___40833;Name=COG0427;db_xref=COG20:COG0427;product=Propionyl CoA:succinate CoA transferase (ACH1) (PDB:2G39) (PUBMED:10769117)
2.1.3.1-RXN	2.1.3.1	UBA7173_sp001915385	NODE_952_length_14915_cov_96_689906	.	CDS	12684	14567	.	-	.	ID=male_bins_95_identity___3224;Name=COG0511;db_xref=COG20:COG0511;product=Biotin carboxyl carrier protein (AccB) (PDB:1A6X)
2.1.3.1-RXN	2.1.3.1	UBA7173_sp001915385	NODE_952_length_14915_cov_96_689906	14564	12933
MALATE-DEH-RXN	1.1.1.37	UBA7173_sp001915385	NODE_694_length_20090_cov_97_610831	.	CDS	690	1625	.	-	.	ID=male_bins_95_identity___992;Name=COG0039;db_xref=COG20:COG0039;product=Malate/lactate dehydrogenase (Mdh) (PDB:4WLO)
### pyruvate dehydrogenase (NADP+): DCM
PYRUVATE-DEHYDROGENASE-NADP+-RXN	1.2.1.51	Muribaculaceae		UniRef50_A0A1Z4V4B0	47.819	0	1078	99	NODE_21_length_164849_cov_43_300691	63669	67184	|PWY-6970|	good_blast	full	rxn00155 rxn33851	NA	0	1
PYRUVATE-DEHYDROGENASE-NADP+-RXN	1.2.1.51	Paramuribaculum_sp001689565		UniRef50_A0A1Z4V4B0	47.776	0	1065	99	NODE_558_length_11999_cov_10_672137	10150	6635	|PWY-6970|	good_blast	full	rxn00155 rxn33851	NA	0	1
PYRUVATE-DEHYDROGENASE-NADP+-RXN	1.2.1.51	Paramuribaculum_sp001689565		UniRef50_A0A1Z4V4B0	44.482	0	975	98	NODE_47_length_46157_cov_11_134918	19491	22910	|PWY-6970|	good_blast	full	rxn00155 rxn33851	NA	0	1
PYRUVATE-DEHYDROGENASE-NADP+-RXN	1.2.1.51	UBA11940_sp013316055		UniRef50_A0A1Z4V4B0	48.35	0	1117	99	NODE_378_length_37201_cov_43_326845	33432	36956	|PWY-6970|	good_blast	full	rxn00155 rxn33851	NA	0	1
### pyruvate fermentation to butanoate: DCM
ACETYL-COA-ACETYLTRANSFER-RXN	2.3.1.16/2.3.1.9	Kineothrix_sp000403275	NODE_623_length_44400_cov_6_419574	.	CDS	6518	7699	.	+	.	ID=male_bins_95_identity___28173;Name=COG0183;db_xref=COG20:COG0183;product=Acetyl-CoA acetyltransferase (PaaJ) (PDB:1AFW)
PHOSPHATE-BUTYRYLTRANSFERASE-RXN	2.3.1.19	Kineothrix_sp000403275	NODE_623_length_44400_cov_6_419574	.	CDS	20497	21408	.	-	.	ID=male_bins_95_identity___28184;Name=COG0280;db_xref=COG20:COG0280;product=Phosphotransacetylase (includes Pta, EutD and phosphobutyryltransferase) (Pta) (PDB:1QZT) (PUBMED:28754323)
BUTYRATE-KINASE-RXN	2.7.2.14/2.7.2.7	Kineothrix_sp000403275	NODE_623_length_44400_cov_6_419574	.	CDS	19396	20463	.	-	.	ID=male_bins_95_identity___28183;Name=COG3426;db_xref=COG20:COG3426;product=Butyrate kinase (Buk) (PDB:1SAZ)
### pyruvate fermentation to propanoate I: DCM
FUMHYDR-RXN	4.2.1.2	Muribaculaceae	NODE_64_length_117185_cov_40_663468	.	CDS	96508	98160	.	+	.	ID=male_bins_95_identity___35995;Name=COG1838;db_xref=COG20:COG1838;product=Tartrate dehydratase beta subunit/Fumarate hydratase class I, C-terminal domain (FumA) (PDB:5L2R)
R601-RXN	1.3.5.4	Muribaculaceae	NODE_2010_length_11812_cov_43_891299	.	CDS	7184	9211	.	+	.	ID=male_bins_95_identity___38604;Name=COG1053;db_xref=COG20:COG1053;product=Succinate dehydrogenase/fumarate reductase, flavoprotein subunit (SdhA) (PDB:1KF6)
RXN0-268	propionyl-CoA:succinate CoA transferase	Muribaculaceae	NODE_261_length_60402_cov_39_213797	.	CDS	93	1586	.	-	.	ID=male_bins_95_identity___40833;Name=COG0427;db_xref=COG20:COG0427;product=Propionyl CoA:succinate CoA transferase (ACH1) (PDB:2G39) (PUBMED:10769117)
2.1.3.1-RXN	2.1.3.1	Muribaculaceae	NODE_64_length_117185_cov_40_663468	.	CDS	112602	114155	.	-	.	ID=male_bins_95_identity___36012;Name=COG4799;db_xref=COG20:COG4799;product=Acetyl-CoA carboxylase, carboxyltransferase component (MmdA) (PDB:1OD2)
MALATE-DEH-RXN	1.1.1.37	Muribaculaceae	NODE_61_length_119866_cov_41_838938	.	CDS	27716	28645	.	+	.	ID=male_bins_95_identity___24541;Name=COG0039;db_xref=COG20:COG0039;product=Malate/lactate dehydrogenase (Mdh) (PDB:4WLO)
FUMHYDR-RXN
R601-RXN	1.3.5.4	Paramuribaculum_sp001689565	NODE_15_length_100041_cov_12_449063	.	CDS	26163	28190	.	-	.	ID=male_bins_95_identity___11671;Name=COG1053;db_xref=COG20:COG1053;product=Succinate dehydrogenase/fumarate reductase, flavoprotein subunit (SdhA) (PDB:1KF6)
RXN0-268	propionyl-CoA:succinate	Paramuribaculum_sp001689565	NODE_58_length_42096_cov_12_027330	.	CDS	29708	31201	.	+	.	ID=male_bins_95_identity___39676;Name=COG0427;db_xref=COG20:COG0427;product=Propionyl CoA:succinate CoA transferase (ACH1) (PDB:2G39) (PUBMED:10769117)
2.1.3.1-RXN	2.1.3.1	Paramuribaculum_sp001689565	NODE_2185_length_5390_cov_8_372634	.	CDS	1112	2995	.	-	.	ID=male_bins_95_identity___15303;Name=COG0511;db_xref=COG20:COG0511;product=Biotin carboxyl carrier protein (AccB) (PDB:1A6X)
2.1.3.1-RXN	2.1.3.1	Paramuribaculum_sp001689565	NODE_2185_length_5390_cov_8_372634	3010	1598
MALATE-DEH-RXN	1.1.1.37	Paramuribaculum_sp001689565	NODE_999_length_8578_cov_11_267394	.	CDS	4393	5322	.	-	.	ID=male_bins_95_identity___26436;Name=COG0039;db_xref=COG20:COG0039;product=Malate/lactate dehydrogenase (Mdh) (PDB:4WLO)
Female Reactions
### pyruvate dehydrogenase (NADP+): sham
PYRUVATE-DEHYDROGENASE-NADP+-RXN	pyruvate dehydrogenase (NADP+)	1.2.1.51		UniRef50_A0A1Z4V4B0	47.729	0	1071	99	NODE_744_length_22788_cov_16_986627	14017	10499	|PWY-6970|	good_blast	full	rxn00155 rxn33851	NA	0	1
PYRUVATE-DEHYDROGENASE-NADP+-RXN	pyruvate dehydrogenase (NADP+)	1.2.1.51		UniRef50_A0A1Z4V4B0	43.414	0	932	95	NODE_97_length_67678_cov_10_818893	24857	28225	|PWY-6970|	good_blast	full	rxn00155 rxn33851	NA	0	1
### pyruvate fermentation to (S)-lactate: sham
L-LACTATE-DEHYDROGENASE-RXN	1.1.1.27	COE1_sp002358575	NODE_12_length_162894_cov_27_263954	.	CDS	72705	73664	.	+	.	ID=female_bins_95_identity___2148;Name=COG0039;db_xref=COG20:COG0039;product=Malate/lactate dehydrogenase (Mdh) (PDB:4WLO)
L-LACTATE-DEHYDROGENASE-RXN	1.1.1.27	COE1_sp009774375	NODE_162_length_73606_cov_10_860043	.	CDS	48761	49717	.	-	.	ID=female_bins_95_identity___17735;Name=COG0039;db_xref=COG20:COG0039;product=Malate/lactate dehydrogenase (Mdh) (PDB:4WLO)
L-LACTATE-DEHYDROGENASE-RXN	1.1.1.27	UBA7173_sp001689485	NODE_437_length_44039_cov_21_467261	.	CDS	14289	15224	.	+	.	ID=female_bins_95_identity___10430;Name=COG0039;db_xref=COG20:COG0039;product=Malate/lactate dehydrogenase (Mdh) (PDB:4WLO)
### pyruvate fermentation to butanoate: sham
ACETYL-COA-ACETYLTRANSFER-RXN	2.3.1.16/2.3.1.9	COE1_sp002358575	NODE_22_length_91632_cov_44_239219	.	CDS	1669	2853	.	+	.	ID=female_bins_95_identity___6100;Name=COG0183;db_xref=COG20:COG0183;product=Acetyl-CoA acetyltransferase (PaaJ) (PDB:1AFW)
PHOSPHATE-BUTYRYLTRANSFERASE-RXN	2.3.1.19	COE1_sp002358575	NODE_59_length_21357_cov_30_720026	.	CDS	16766	17686	.	-	.	ID=female_bins_95_identity___17486;Name=COG0280;db_xref=COG20:COG0280;product=Phosphotransacetylase (includes Pta, EutD and phosphobutyryltransferase) (Pta) (PDB:1QZT) (PUBMED:28754323)
BUTYRATE-KINASE-RXN	2.7.2.14/2.7.2.7	COE1_sp002358575	NODE_59_length_21357_cov_30_720026	.	CDS	15676	16743	.	-	.	ID=female_bins_95_identity___17485;Name=COG3426;db_xref=COG20:COG3426;product=Butyrate kinase (Buk) (PDB:1SAZ)
ACETYL-COA-ACETYLTRANSFER-RXN	2.3.1.16/2.3.1.9	COE1_sp009774375	NODE_171_length_72308_cov_10_393506	27794	26625	.	CDS	26616	27800	.	-	.	ID=female_bins_95_identity___18699;Name=COG0183;db_xref=COG20:COG0183;product=Acetyl-CoA acetyltransferase (PaaJ) (PDB:1AFW)
PHOSPHATE-BUTYRYLTRANSFERASE-RXN	2.3.1.19	COE1_sp009774375	NODE_171_length_72308_cov_10_393506	.	CDS	18819	19739	.	+	.	ID=female_bins_95_identity___18691;Name=COG0280;db_xref=COG20:COG0280;product=Phosphotransacetylase (includes Pta, EutD and phosphobutyryltransferase) (Pta) (PDB:1QZT) (PUBMED:28754323)
BUTYRATE-KINASE-RXN	2.7.2.14/2.7.2.7	COE1_sp009774375	NODE_171_length_72308_cov_10_393506	.	CDS	19785	20852	.	+	.	ID=female_bins_95_identity___18692;Name=COG3426;db_xref=COG20:COG3426;product=Butyrate kinase (Buk) (PDB:1SAZ)
ACETYL-COA-ACETYLTRANSFER-RXN	2.3.1.16/2.3.1.9	Clostridia	NODE_140_length_83594_cov_14_981709	.	CDS	62142	63332	.	-	.	ID=female_bins_95_identity___12679;Name=COG0183;db_xref=COG20:COG0183;product=Acetyl-CoA acetyltransferase (PaaJ) (PDB:1AFW)
PHOSPHATE-BUTYRYLTRANSFERASE-RXN	2.3.1.19	Clostridia	NODE_217_length_68110_cov_15_560062	.	CDS	38864	39781	.	-	.	ID=female_bins_95_identity___13827;Name=COG0280;db_xref=COG20:COG0280;product=Phosphotransacetylase (includes Pta, EutD and phosphobutyryltransferase) (Pta) (PDB:1QZT) (PUBMED:28754323)
BUTYRATE-KINASE-RXN	2.7.2.14/2.7.2.7	Clostridia	NODE_217_length_68110_cov_15_560062	.	CDS	37645	38712	.	-	.	ID=female_bins_95_identity___13826;Name=COG3426;db_xref=COG20:COG3426;product=Butyrate kinase (Buk) (PDB:1SAZ)
### pyruvate fermentation to propanoate I: sham
FUMHYDR-RXN	4.2.1.2	UBA7173_sp002491305	NODE_175_length_53319_cov_11_307093	.	CDS	38709	40358	.	-	.	ID=female_bins_95_identity___5471;Name=COG1838;db_xref=COG20:COG1838;product=Tartrate dehydratase beta subunit/Fumarate hydratase class I, C-terminal domain (FumA) (PDB:5L2R)
R601-RXN	1.3.5.4	UBA7173_sp002491305	NODE_738_length_22925_cov_12_576213	.	CDS	12219	14246	.	-	.	ID=female_bins_95_identity___18507;Name=COG1053;db_xref=COG20:COG1053;product=Succinate dehydrogenase/fumarate reductase, flavoprotein subunit (SdhA) (PDB:1KF6)
RXN0-268	propionyl-CoA:succinate CoA transferase	UBA7173_sp002491305	NODE_396_length_33243_cov_10_070538	.	CDS	29609	31102	.	+	.	ID=female_bins_95_identity___12057;Name=COG0427;db_xref=COG20:COG0427;product=Propionyl CoA:succinate CoA transferase (ACH1) (PDB:2G39) (PUBMED:10769117)
2.1.3.1-RXN	2.1.3.1	UBA7173_sp002491305	NODE_508_length_28927_cov_12_023206	.	CDS	2771	4324	.	-	.	ID=female_bins_95_identity___13305;Name=COG4799;db_xref=COG20:COG4799;product=Acetyl-CoA carboxylase, carboxyltransferase component (MmdA) (PDB:1OD2)
MALATE-DEH-RXN	1.1.1.37	UBA7173_sp002491305	NODE_56_length_79368_cov_11_927250	.	CDS	41188	42123	.	+	.	ID=female_bins_95_identity___1234;Name=COG0039;db_xref=COG20:COG0039;product=Malate/lactate dehydrogenase (Mdh) (PDB:4WLO)
### pyruvate dehydrogenase (NADP+): DCM
PYRUVATE-DEHYDROGENASE-NADP+-RXN	1.2.1.51	Alistipes_sp009774895		UniRef50_A0A1Z4V4B0	49.298	0	1123	99	NODE_54_length_52269_cov_8_164247	33514	29996	|PWY-6970|	good_blast	full	rxn00155 rxn33851	NA	0	1
PYRUVATE-DEHYDROGENASE-NADP+-RXN	1.2.1.51	Lawsonibacter		UniRef50_A0A1Z4V4B0	45.942	0	1064	99	NODE_81_length_82498_cov_30_295950	4293	7919	|PWY-6970|	good_blast	full	rxn00155 rxn33851	NA	0	1
PYRUVATE-DEHYDROGENASE-NADP+-RXN	1.2.1.51	UBA7173_sp001689485		UniRef50_A0A1Z4V4B0	47.521	0	1058	99	NODE_110_length_110366_cov_23_541143	69576	73094	|PWY-6970|	good_blast	full	rxn00155 rxn33851	NA	0	1
PYRUVATE-DEHYDROGENASE-NADP+-RXN	1.2.1.51	UBA7173_sp001689485		UniRef50_A0A1Z4V4B0	44.349	0	974	95	NODE_356_length_50923_cov_30_539553	21502	18125	|PWY-6970|	good_blast	full	rxn00155 rxn33851	NA	0	1
### pyruvate fermentation to (S)-lactate: DCM
L-LACTATE-DEHYDROGENASE-RXN	1.1.1.27	Lawsonibacter	NODE_55_length_100217_cov_27_686957	.	CDS	38439	39383	.	-	.	ID=female_bins_95_identity___10611;Name=COG0039;db_xref=COG20:COG0039;product=Malate/lactate dehydrogenase (Mdh) (PDB:4WLO)
### pyruvate fermentation to butanoate: DCM
ACETYL-COA-ACETYLTRANSFER-RXN	2.3.1.16/2.3.1.9	Lawsonibacter	NODE_759_length_23276_cov_27_951811	.	CDS	13142	14257	.	+	.	ID=female_bins_95_identity___4499;Name=COG0183;db_xref=COG20:COG0183;product=Acetyl-CoA acetyltransferase (PaaJ) (PDB:1AFW)
PHOSPHATE-BUTYRYLTRANSFERASE-RXN	2.3.1.19	Lawsonibacter	NODE_104_length_71662_cov_29_282766
BUTYRATE-KINASE-RXN	2.7.2.14/2.7.2.7	Lawsonibacter	NODE_104_length_71662_cov_29_282766
### pyruvate fermentation to propanoate I: DCM
FUMHYDR-RXN	4.2.1.2	Alistipes_sp009774895	NODE_109_length_39689_cov_8_252309	.	CDS	19027	20640	.	-	.	ID=female_bins_95_identity___733;Name=COG1838;db_xref=COG20:COG1838;product=Tartrate dehydratase beta subunit/Fumarate hydratase class I, C-terminal domain (FumA) (PDB:5L2R)
R601-RXN	1.3.5.4	Alistipes_sp009774895	NODE_367_length_22214_cov_7_095672	.	CDS	9796	11742	.	+	.	ID=female_bins_95_identity___7688;Name=COG1053;db_xref=COG20:COG1053;product=Succinate dehydrogenase/fumarate reductase, flavoprotein subunit (SdhA) (PDB:1KF6)
RXN0-268	propionyl-CoA:succinate CoA transferase	Alistipes_sp009774895	NODE_5_length_114957_cov_9_480653	.	CDS	3647	4942	.	+	.	ID=female_bins_95_identity___14859;Name=COG0427;db_xref=COG20:COG0427;product=Propionyl CoA:succinate CoA transferase (ACH1) (PDB:2G39) (PUBMED:10769117)
2.1.3.1-RXN	2.1.3.1	Alistipes_sp009774895	NODE_263_length_26288_cov_7_226470	.	CDS	629	2482	.	-	.	ID=female_bins_95_identity___4461;Name=COG4770;db_xref=COG20:COG4770;product=Acetyl/propionyl-CoA carboxylase, alpha subunit (PccA) (PDB:3U9S)
MALATE-DEH-RXN	1.1.1.37	Alistipes_sp009774895	NODE_31_length_65208_cov_9_345019	.	CDS	34323	35264	.	-	.	ID=female_bins_95_identity___15275;Name=COG0039;db_xref=COG20:COG0039;product=Malate/lactate dehydrogenase (Mdh) (PDB:4WLO)
FUMHYDR-RXN	4.2.1.2	UBA7173_sp001689485	NODE_127_length_101912_cov_22_804697	.	CDS	100091	101740	.	-	.	ID=female_bins_95_identity___4649;Name=COG1838;db_xref=COG20:COG1838;product=Tartrate dehydratase beta subunit/Fumarate hydratase class I, C-terminal domain (FumA) (PDB:5L2R)
R601-RXN	1.3.5.4	UBA7173_sp001689485	NODE_110_length_110366_cov_23_541143	.	CDS	106882	108909	.	-	.	ID=female_bins_95_identity___2532;Name=COG1053;db_xref=COG20:COG1053;product=Succinate dehydrogenase/fumarate reductase, flavoprotein subunit (SdhA) (PDB:1KF6)
RXN0-268	propionyl-CoA:succinate CoA transferase	UBA7173_sp001689485	NODE_88_length_121142_cov_21_119517	.	CDS	77686	79179	.	-	.	ID=female_bins_95_identity___2013;Name=COG0427;db_xref=COG20:COG0427;product=Propionyl CoA:succinate CoA transferase (ACH1) (PDB:2G39) (PUBMED:10769117)
2.1.3.1-RXN	2.1.3.1	UBA7173_sp001689485	NODE_39_length_189199_cov_19_758850	.	CDS	107316	109214	.	+	.	ID=female_bins_95_identity___18818;Name=COG0511;db_xref=COG20:COG0511;product=Biotin carboxyl carrier protein (AccB) (PDB:1A6X)
MALATE-DEH-RXN	1.1.1.37	UBA7173_sp001689485	NODE_437_length_44039_cov_21_467261	.	CDS	14289	15224	.	+	.	ID=female_bins_95_identity___10430;Name=COG0039;db_xref=COG20:COG0039;product=Malate/lactate dehydrogenase (Mdh) (PDB:4WLO)
